# Supplementary material for: HTE- and AI-assisted development of DHP-catalyzed decarboxylative selenation
Source: Royal Society of Chemistry journal article supplement (doi:10.1039/d2cc06217h), 2023-01-01
Supplement: d2cc06217h1.xlsx [file d2cc06217h1.xlsx]

## Sheet: Data set A
Entry	Substrate_1	Substrate_2	Catalyst	Solvent	Product	Yield
1	BrC1=CC=C(CC(O)=O)C=C1	C1([Se][Se]C2=CC=CC=C2)=CC=CC=C1	NC(C1=CN(CC2=CC=C(OC)C=C2)C=CC1)=O	CS(C)=O	BrC1=CC=C(C[Se]C2=CC=CC=C2)C=C1	0.27376
2	BrC1=CC=C(CC(O)=O)C=C1	C1([Se][Se]C2=CC=CC=C2)=CC=CC=C1	NC(C1=CN(CC2=CC=CC=C2)C=C(C(N)=O)C1C3=CC=CC=C3)=O	CS(C)=O	BrC1=CC=C(C[Se]C2=CC=CC=C2)C=C1	0.215354
3	O=C(CCCC1=CNC2=C1C=CC=C2)O	C1([Se][Se]C2=CC=CC=C2)=CC=CC=C1	NC(C1=CN(CC2=CC=C(C(F)(F)F)C=C2)C=CC1)=O	CS(C)=O	C1(CCC[Se]C2=CC=CC=C2)=CNC3=C1C=CC=C3	0.726506
4	O=C(CCCC1=CNC2=C1C=CC=C2)O	C1([Se][Se]C2=CC=CC=C2)=CC=CC=C1	NC(C1=CN(CC2=CC=CC=C2)C=C(C(N)=O)C1C3=CC=CC=C3)=O	CS(C)=O	C1(CCC[Se]C2=CC=CC=C2)=CNC3=C1C=CC=C3	0.564986
5	CC1=CC=C(S(N2CCC(C(O)=O)CC2)(=O)=O)C=C1	C1([Se][Se]C2=CC=CC=C2)=CC=CC=C1	NC(C1=CN(CC2=CC=CC=C2)C=CC1)=O	CS(C)=O	CC1=CC=C(S(N2CCC([Se]C3=CC=CC=C3)CC2)(=O)=O)C=C1	0.99
6	CC1=CC=C(S(N2CCC(C(O)=O)CC2)(=O)=O)C=C1	C1([Se][Se]C2=CC=CC=C2)=CC=CC=C1	NC(C1=CN(CC2=CC=C(OC)C=C2)C=CC1)=O	CS(C)=O	CC1=CC=C(S(N2CCC([Se]C3=CC=CC=C3)CC2)(=O)=O)C=C1	0.99
7	CC1=CC=C(S(N2CCC(C(O)=O)CC2)(=O)=O)C=C1	C1([Se][Se]C2=CC=CC=C2)=CC=CC=C1	NC(C1=CN(CC2=CC=C(C(F)(F)F)C=C2)C=CC1)=O	CS(C)=O	CC1=CC=C(S(N2CCC([Se]C3=CC=CC=C3)CC2)(=O)=O)C=C1	0.99
8	O=C1C2=CC(CC(O)=O)=CC=C2OCC3=CC=CC=C13	C1([Se][Se]C2=CC=CC=C2)=CC=CC=C1	NC(C1=CN(CC2=CC=CC=C2)C=CC1)=O	CS(C)=O	O=C1C2=CC(C[Se]C3=CC=CC=C3)=CC=C2OCC4=CC=CC=C14	0.769537
9	O=C(N1CCC(C(O)=O)CC1)OCC2=CC=CC=C2	C1([Se][Se]C2=CC=CC=C2)=CC=CC=C1	NC(C1=CN(CC2=CC=C(OC)C=C2)C=CC1)=O	CS(C)=O	O=C(N1CCC([Se]C2=CC=CC=C2)CC1)OCC3=CC=CC=C3	0.854504
10	O=C(N1CCC(C(O)=O)CC1)OCC2=CC=CC=C2	C1([Se][Se]C2=CC=CC=C2)=CC=CC=C1	NC(C1=CN(CC2=CC=CC=C2)C=C(C(N)=O)C1)=O	CS(C)=O	O=C(N1CCC([Se]C2=CC=CC=C2)CC1)OCC3=CC=CC=C3	0.830446
11	O=C(OCC1=CC=CC=C1)[C@H](NC(OC(C)(C)C)=O)CC(O)=O	C1([Se][Se]C2=CC=CC=C2)=CC=CC=C1	NC(C1=CN(CC2=CC=CC=C2)C=C(C(N)=O)C1)=O	CS(C)=O	O=C(OCC1=CC=CC=C1)[C@H](NC(OC(C)(C)C)=O)C[Se]C2=CC=CC=C2	0.858129
12	CC(C1=CC=C2C=C(OC)C=CC2=C1)C(O)=O	C1([Se][Se]C2=CC=CC=C2)=CC=CC=C1	NC(C1=CN(CC2=CC=C(OC)C=C2)C=CC1)=O	CS(C)=O	CC(C1=CC=C2C=C(OC)C=CC2=C1)[Se]C3=CC=CC=C3	0.605574
13	O=C(C1(C2=CC=CC=C2)CC1)O	C1([Se][Se]C2=CC=CC=C2)=CC=CC=C1	NC(C1=CN(CC2=CC=C(OC)C=C2)C=CC1)=O	CS(C)=O	C1(C2([Se]C3=CC=CC=C3)CC2)=CC=CC=C1	0.78
14	O=C(C1(C2=CC=CC=C2)CC1)O	C1([Se][Se]C2=CC=CC=C2)=CC=CC=C1	NC(C1=CN(CC2=CC=C(C(F)(F)F)C=C2)C=CC1)=O	CS(C)=O	C1(C2([Se]C3=CC=CC=C3)CC2)=CC=CC=C1	0.651262
15	O=C(C1(C2=CC=CC=C2)CC1)O	C1([Se][Se]C2=CC=CC=C2)=CC=CC=C1	NC(C1=CN(CC2=CC=CC=C2)C=C(C(N)=O)C1)=O	CS(C)=O	C1(C2([Se]C3=CC=CC=C3)CC2)=CC=CC=C1	0.586629
16	CC1=CC=C(S(N2CCC(C(O)=O)CC2)(=O)=O)C=C1	C1([Se][Se]C2=CC=CC=C2)=CC=CC=C1	NC(C1=CN(CC2=CC=C(OC)C=C2)C=CC1)=O	[H]C(N(C)C)=O	CC1=CC=C(S(N2CCC([Se]C3=CC=CC=C3)CC2)(=O)=O)C=C1	0.640715
17	FC1(F)CCC(C(O)=O)CC1	C1([Se][Se]C2=CC=CC=C2)=CC=CC=C1	NC(C1=CN(CC2=CC=CC=C2)C=CC1)=O	[H]C(N(C)C)=O	FC1(F)CCC([Se]C2=CC=CC=C2)CC1	0.250331
18	FC1(F)CCC(C(O)=O)CC1	C1([Se][Se]C2=CC=CC=C2)=CC=CC=C1	NC(C1=CN(CC2=CC=C(OC)C=C2)C=CC1)=O	[H]C(N(C)C)=O	FC1(F)CCC([Se]C2=CC=CC=C2)CC1	0.249313
19	FC1(F)CCC(C(O)=O)CC1	C1([Se][Se]C2=CC=CC=C2)=CC=CC=C1	NC(C1=CN(CC2=CC=CC=C2)C=C(C(N)=O)C1C3=CC=CC=C3)=O	[H]C(N(C)C)=O	FC1(F)CCC([Se]C2=CC=CC=C2)CC1	0.14899
20	CC(C1=CC=C(CC2C(CCC2)=O)C=C1)C(O)=O	C1([Se][Se]C2=CC=CC=C2)=CC=CC=C1	NC(C1=CN(CC2=CC=CC=C2)C=C(C(N)=O)C1C3=CC=CC=C3)=O	[H]C(N(C)C)=O	CC(C1=CC=C(CC2C(CCC2)=O)C=C1)[Se]C3=CC=CC=C3	0.00954165
21	CC(N1C(C2=CC=C(Cl)C=C2)=O)=C(CC(O)=O)C3=C1C=CC(OC)=C3	C1([Se][Se]C2=CC=CC=C2)=CC=CC=C1	NC(C1=CN(CC2=CC=CC=C2)C=C(C(N)=O)C1)=O	[H]C(N(C)C)=O	CC(N1C(C2=CC=C(Cl)C=C2)=O)=C(C[Se]C3=CC=CC=C3)C4=C1C=CC(OC)=C4	0.454334
22	CC(N1C(C2=CC=C(Cl)C=C2)=O)=C(CC(O)=O)C3=C1C=CC(OC)=C3	C1([Se][Se]C2=CC=CC=C2)=CC=CC=C1	NC(C1=CN(CC2=CC=CC=C2)C=C(C(N)=O)C1C3=CC=CC=C3)=O	[H]C(N(C)C)=O	CC(N1C(C2=CC=C(Cl)C=C2)=O)=C(C[Se]C3=CC=CC=C3)C4=C1C=CC(OC)=C4	0.320481
23	COC1=CC=C(CC(O)=O)C=C1	C1([Se][Se]C2=CC=CC=C2)=CC=CC=C1	NC(C1=CN(CC2=CC=CC=C2)C=C(C(N)=O)C1C3=CC=CC=C3)=O	[H]C(N(C)C)=O	COC1=CC=C(C[Se]C2=CC=CC=C2)C=C1	0.302455
24	O=C(C1CCOCC1)O	C1([Se][Se]C2=CC=CC=C2)=CC=CC=C1	NC(C1=CN(CC2=CC=CC=C2)C=CC1)=O	[H]C(N(C)C)=O	C1([Se]C2=CC=CC=C2)CCOCC1	0.753973
25	O=C(C1CCOCC1)O	C1([Se][Se]C2=CC=CC=C2)=CC=CC=C1	NC(C1=CN(CC2=CC=C(C(F)(F)F)C=C2)C=CC1)=O	[H]C(N(C)C)=O	C1([Se]C2=CC=CC=C2)CCOCC1	0.763302
26	O=C(N1CCC(C(O)=O)CC1)OCC2=CC=CC=C2	C1([Se][Se]C2=CC=CC=C2)=CC=CC=C1	NC(C1=CN(CC2=CC=CC=C2)C=C(C(N)=O)C1C3=CC=CC=C3)=O	[H]C(N(C)C)=O	O=C(N1CCC([Se]C2=CC=CC=C2)CC1)OCC3=CC=CC=C3	0.622515
27	O=C(C1CCC1)O	C1([Se][Se]C2=CC=CC=C2)=CC=CC=C1	NC(C1=CN(CC2=CC=C(OC)C=C2)C=CC1)=O	[H]C(N(C)C)=O	C1([Se]C2=CC=CC=C2)CCC1	0.640482
28	O=C(C1CCC1)O	C1([Se][Se]C2=CC=CC=C2)=CC=CC=C1	NC(C1=CN(CC2=CC=C(C(F)(F)F)C=C2)C=CC1)=O	[H]C(N(C)C)=O	C1([Se]C2=CC=CC=C2)CCC1	0.68023
29	O=C(C1CCC1)O	C1([Se][Se]C2=CC=CC=C2)=CC=CC=C1	NC(C1=CN(CC2=CC=CC=C2)C=C(C(N)=O)C1C3=CC=CC=C3)=O	[H]C(N(C)C)=O	C1([Se]C2=CC=CC=C2)CCC1	0.483041
30	CC(C1=CC=C2C=C(OC)C=CC2=C1)C(O)=O	C1([Se][Se]C2=CC=CC=C2)=CC=CC=C1	NC(C1=CN(CC2=CC=CC=C2)C=CC1)=O	[H]C(N(C)C)=O	CC(C1=CC=C2C=C(OC)C=CC2=C1)[Se]C3=CC=CC=C3	0.642473
31	CC(C1=CC=C2C=C(OC)C=CC2=C1)C(O)=O	C1([Se][Se]C2=CC=CC=C2)=CC=CC=C1	NC(C1=CN(CC2=CC=C(C(F)(F)F)C=C2)C=CC1)=O	[H]C(N(C)C)=O	CC(C1=CC=C2C=C(OC)C=CC2=C1)[Se]C3=CC=CC=C3	0.621643
32	O=C(C1(C2=CC=CC=C2)CC1)O	C1([Se][Se]C2=CC=CC=C2)=CC=CC=C1	NC(C1=CN(CC2=CC=C(OC)C=C2)C=CC1)=O	[H]C(N(C)C)=O	C1(C2([Se]C3=CC=CC=C3)CC2)=CC=CC=C1	0
33	O=C(CCCC1=CNC2=C1C=CC=C2)O	C1([Se][Se]C2=CC=CC=C2)=CC=CC=C1	NC(C1=CN(CC2=CC=C(OC)C=C2)C=CC1)=O	CC#N	C1(CCC[Se]C2=CC=CC=C2)=CNC3=C1C=CC=C3	0.667359
34	O=C(CCCC1=CNC2=C1C=CC=C2)O	C1([Se][Se]C2=CC=CC=C2)=CC=CC=C1	NC(C1=CN(CC2=CC=C(C(F)(F)F)C=C2)C=CC1)=O	CC#N	C1(CCC[Se]C2=CC=CC=C2)=CNC3=C1C=CC=C3	0.59321
35	CC1=CC=C(S(N2CCC(C(O)=O)CC2)(=O)=O)C=C1	C1([Se][Se]C2=CC=CC=C2)=CC=CC=C1	NC(C1=CN(CC2=CC=CC=C2)C=C(C(N)=O)C1)=O	CC#N	CC1=CC=C(S(N2CCC([Se]C3=CC=CC=C3)CC2)(=O)=O)C=C1	0.358787
36	CC1=CC=C(S(N2CCC(C(O)=O)CC2)(=O)=O)C=C1	C1([Se][Se]C2=CC=CC=C2)=CC=CC=C1	NC(C1=CN(CC2=CC=CC=C2)C=C(C(N)=O)C1C3=CC=CC=C3)=O	CC#N	CC1=CC=C(S(N2CCC([Se]C3=CC=CC=C3)CC2)(=O)=O)C=C1	0.0706403
37	O=C(CCC1=CC=CC=C1)O	C1([Se][Se]C2=CC=CC=C2)=CC=CC=C1	NC(C1=CN(CC2=CC=CC=C2)C=C(C(N)=O)C1C3=CC=CC=C3)=O	CC#N	C1(CC[Se]C2=CC=CC=C2)=CC=CC=C1	0
38	FC1(F)CCC(C(O)=O)CC1	C1([Se][Se]C2=CC=CC=C2)=CC=CC=C1	NC(C1=CN(CC2=CC=CC=C2)C=C(C(N)=O)C1)=O	CC#N	FC1(F)CCC([Se]C2=CC=CC=C2)CC1	0.184129
39	O=C1C2=CC(CC(O)=O)=CC=C2OCC3=CC=CC=C13	C1([Se][Se]C2=CC=CC=C2)=CC=CC=C1	NC(C1=CN(CC2=CC=CC=C2)C=C(C(N)=O)C1)=O	CC#N	O=C1C2=CC(C[Se]C3=CC=CC=C3)=CC=C2OCC4=CC=CC=C14	0.476499
40	CC(C1=CC=C(CC2C(CCC2)=O)C=C1)C(O)=O	C1([Se][Se]C2=CC=CC=C2)=CC=CC=C1	NC(C1=CN(CC2=CC=CC=C2)C=CC1)=O	CC#N	CC(C1=CC=C(CC2C(CCC2)=O)C=C1)[Se]C3=CC=CC=C3	0.549839
41	CC1=CC=C(CC(O)=O)C=C1	C1([Se][Se]C2=CC=CC=C2)=CC=CC=C1	NC(C1=CN(CC2=CC=C(C(F)(F)F)C=C2)C=CC1)=O	CC#N	CC1=CC=C(C[Se]C2=CC=CC=C2)C=C1	0.118179
42	CC1=CC=C(CC(O)=O)C=C1	C1([Se][Se]C2=CC=CC=C2)=CC=CC=C1	NC(C1=CN(CC2=CC=CC=C2)C=C(C(N)=O)C1C3=CC=CC=C3)=O	CC#N	CC1=CC=C(C[Se]C2=CC=CC=C2)C=C1	0
43	BrC1=CC=C(CC(O)=O)C=C1	C1([Se][Se]C2=CC=CC=C2)=CC=CC=C1	NC(C1=CN(CC2=CC=C(OC)C=C2)C=CC1)=O	CC#N	BrC1=CC=C(C[Se]C2=CC=CC=C2)C=C1	0.271746
44	COC1=CC=C(CC(O)=O)C=C1	C1([Se][Se]C2=CC=CC=C2)=CC=CC=C1	NC(C1=CN(CC2=CC=CC=C2)C=C(C(N)=O)C1C3=CC=CC=C3)=O	CC#N	COC1=CC=C(C[Se]C2=CC=CC=C2)C=C1	0
45	O=C(N1CCC(C(O)=O)CC1)OCC2=CC=CC=C2	C1([Se][Se]C2=CC=CC=C2)=CC=CC=C1	NC(C1=CN(CC2=CC=C(C(F)(F)F)C=C2)C=CC1)=O	CC#N	O=C(N1CCC([Se]C2=CC=CC=C2)CC1)OCC3=CC=CC=C3	0.59056
46	O=C(OCC1=CC=CC=C1)[C@H](NC(OC(C)(C)C)=O)CC(O)=O	C1([Se][Se]C2=CC=CC=C2)=CC=CC=C1	NC(C1=CN(CC2=CC=CC=C2)C=CC1)=O	CC#N	O=C(OCC1=CC=CC=C1)[C@H](NC(OC(C)(C)C)=O)C[Se]C2=CC=CC=C2	0.752062
47	O=C(OCC1=CC=CC=C1)[C@H](NC(OC(C)(C)C)=O)CC(O)=O	C1([Se][Se]C2=CC=CC=C2)=CC=CC=C1	NC(C1=CN(CC2=CC=C(OC)C=C2)C=CC1)=O	CC#N	O=C(OCC1=CC=CC=C1)[C@H](NC(OC(C)(C)C)=O)C[Se]C2=CC=CC=C2	0.901023
48	O=C(OCC1=CC=CC=C1)[C@H](NC(OC(C)(C)C)=O)CC(O)=O	C1([Se][Se]C2=CC=CC=C2)=CC=CC=C1	NC(C1=CN(CC2=CC=CC=C2)C=C(C(N)=O)C1C3=CC=CC=C3)=O	CC#N	O=C(OCC1=CC=CC=C1)[C@H](NC(OC(C)(C)C)=O)C[Se]C2=CC=CC=C2	0.084659
49	CC(N(C(C1=C2C=CC=C1)=O)C2=O)C(O)=O	C1(C[Se][Se]CC2=CC=CC=C2)=CC=CC=C1	NC(C1=CN(CC2=CC=C(C(F)(F)F)C=C2)C=CC1)=O	CS(C)=O	CC(N(C(C1=C2C=CC=C1)=O)C2=O)[Se]CC3=CC=CC=C3	0.198208
50	O=C(CCCC1=CNC2=C1C=CC=C2)O	C1(C[Se][Se]CC2=CC=CC=C2)=CC=CC=C1	NC(C1=CN(CC2=CC=C(OC)C=C2)C=CC1)=O	CS(C)=O	C1(CCC[Se]CC2=CC=CC=C2)=CNC3=C1C=CC=C3	0.13498
51	O=C(CCCC1=CNC2=C1C=CC=C2)O	C1(C[Se][Se]CC2=CC=CC=C2)=CC=CC=C1	NC(C1=CN(CC2=CC=C(C(F)(F)F)C=C2)C=CC1)=O	CS(C)=O	C1(CCC[Se]CC2=CC=CC=C2)=CNC3=C1C=CC=C3	0.0768673
52	O=C1C2=CC(CC(O)=O)=CC=C2OCC3=CC=CC=C13	C1(C[Se][Se]CC2=CC=CC=C2)=CC=CC=C1	NC(C1=CN(CC2=CC=C(C(F)(F)F)C=C2)C=CC1)=O	CS(C)=O	O=C1C2=CC(C[Se]CC3=CC=CC=C3)=CC=C2OCC4=CC=CC=C14	0.274048
53	O=C1C2=CC(CC(O)=O)=CC=C2OCC3=CC=CC=C13	C1(C[Se][Se]CC2=CC=CC=C2)=CC=CC=C1	NC(C1=CN(CC2=CC=CC=C2)C=C(C(N)=O)C1)=O	CS(C)=O	O=C1C2=CC(C[Se]CC3=CC=CC=C3)=CC=C2OCC4=CC=CC=C14	0.276098
54	CC(C1=CC=C(CC2C(CCC2)=O)C=C1)C(O)=O	C1(C[Se][Se]CC2=CC=CC=C2)=CC=CC=C1	NC(C1=CN(CC2=CC=C(OC)C=C2)C=CC1)=O	CS(C)=O	CC(C1=CC=C(CC2C(CCC2)=O)C=C1)[Se]CC3=CC=CC=C3	0.166509
55	CC(N(C(C1=C2C=CC=C1)=O)C2=O)C(O)=O	C1(C[Se][Se]CC2=CC=CC=C2)=CC=CC=C1	NC(C1=CN(CC2=CC=CC=C2)C=CC1)=O	[H]C(N(C)C)=O	CC(N(C(C1=C2C=CC=C1)=O)C2=O)[Se]CC3=CC=CC=C3	0.202539
56	CC1=CC=C(S(N2CCC(C(O)=O)CC2)(=O)=O)C=C1	C1(C[Se][Se]CC2=CC=CC=C2)=CC=CC=C1	NC(C1=CN(CC2=CC=C(OC)C=C2)C=CC1)=O	[H]C(N(C)C)=O	CC1=CC=C(S(N2CCC([Se]CC3=CC=CC=C3)CC2)(=O)=O)C=C1	0.157108
57	O=C1C2=CC(CC(O)=O)=CC=C2OCC3=CC=CC=C13	C1(C[Se][Se]CC2=CC=CC=C2)=CC=CC=C1	NC(C1=CN(CC2=CC=C(C(F)(F)F)C=C2)C=CC1)=O	[H]C(N(C)C)=O	O=C1C2=CC(C[Se]CC3=CC=CC=C3)=CC=C2OCC4=CC=CC=C14	0.277123
58	O=C1C2=CC(CC(O)=O)=CC=C2OCC3=CC=CC=C13	C1(C[Se][Se]CC2=CC=CC=C2)=CC=CC=C1	NC(C1=CN(CC2=CC=CC=C2)C=C(C(N)=O)C1)=O	[H]C(N(C)C)=O	O=C1C2=CC(C[Se]CC3=CC=CC=C3)=CC=C2OCC4=CC=CC=C14	0.285325
59	O=C1C2=CC(CC(O)=O)=CC=C2OCC3=CC=CC=C13	C1(C[Se][Se]CC2=CC=CC=C2)=CC=CC=C1	NC(C1=CN(CC2=CC=CC=C2)C=C(C(N)=O)C1C3=CC=CC=C3)=O	[H]C(N(C)C)=O	O=C1C2=CC(C[Se]CC3=CC=CC=C3)=CC=C2OCC4=CC=CC=C14	0.283275
60	CC(C1=CC=C(CC2C(CCC2)=O)C=C1)C(O)=O	C1(C[Se][Se]CC2=CC=CC=C2)=CC=CC=C1	NC(C1=CN(CC2=CC=CC=C2)C=C(C(N)=O)C1)=O	[H]C(N(C)C)=O	CC(C1=CC=C(CC2C(CCC2)=O)C=C1)[Se]CC3=CC=CC=C3	0
61	CC(N1C(C2=CC=C(Cl)C=C2)=O)=C(CC(O)=O)C3=C1C=CC(OC)=C3	C1(C[Se][Se]CC2=CC=CC=C2)=CC=CC=C1	NC(C1=CN(CC2=CC=C(OC)C=C2)C=CC1)=O	[H]C(N(C)C)=O	CC(N1C(C2=CC=C(Cl)C=C2)=O)=C(C[Se]CC3=CC=CC=C3)C4=C1C=CC(OC)=C4	0.0226881
62	CC(N(C(C1=C2C=CC=C1)=O)C2=O)C(O)=O	C1(C[Se][Se]CC2=CC=CC=C2)=CC=CC=C1	NC(C1=CN(CC2=CC=C(C(F)(F)F)C=C2)C=CC1)=O	CC#N	CC(N(C(C1=C2C=CC=C1)=O)C2=O)[Se]CC3=CC=CC=C3	0.245687
63	CC1=CC=C(S(N2CCC(C(O)=O)CC2)(=O)=O)C=C1	C1(C[Se][Se]CC2=CC=CC=C2)=CC=CC=C1	NC(C1=CN(CC2=CC=CC=C2)C=C(C(N)=O)C1)=O	CC#N	CC1=CC=C(S(N2CCC([Se]CC3=CC=CC=C3)CC2)(=O)=O)C=C1	0
64	CC(N1C(C2=CC=C(Cl)C=C2)=O)=C(CC(O)=O)C3=C1C=CC(OC)=C3	C1(C[Se][Se]CC2=CC=CC=C2)=CC=CC=C1	NC(C1=CN(CC2=CC=CC=C2)C=C(C(N)=O)C1C3=CC=CC=C3)=O	CC#N	CC(N1C(C2=CC=C(Cl)C=C2)=O)=C(C[Se]CC3=CC=CC=C3)C4=C1C=CC(OC)=C4	0
65	O=C(N1CCC(C(O)=O)CC1)OCC2=CC=CC=C2	C1(C[Se][Se]CC2=CC=CC=C2)=CC=CC=C1	NC(C1=CN(CC2=CC=CC=C2)C=C(C(N)=O)C1C3=CC=CC=C3)=O	CS(C)=O	O=C(N1CCC([Se]CC2=CC=CC=C2)CC1)OCC3=CC=CC=C3	0.0106761
66	CC(C1=CC=C2C=C(OC)C=CC2=C1)C(O)=O	C1(C[Se][Se]CC2=CC=CC=C2)=CC=CC=C1	NC(C1=CN(CC2=CC=C(OC)C=C2)C=CC1)=O	CS(C)=O	CC(C1=CC=C2C=C(OC)C=CC2=C1)[Se]CC3=CC=CC=C3	0.0975506
67	CC(C1=CC=C2C=C(OC)C=CC2=C1)C(O)=O	C1(C[Se][Se]CC2=CC=CC=C2)=CC=CC=C1	NC(C1=CN(CC2=CC=CC=C2)C=C(C(N)=O)C1)=O	CS(C)=O	CC(C1=CC=C2C=C(OC)C=CC2=C1)[Se]CC3=CC=CC=C3	0.005
68	O=C(C1CCCCC1)O	C1(C[Se][Se]CC2=CC=CC=C2)=CC=CC=C1	NC(C1=CN(CC2=CC=CC=C2)C=C(C(N)=O)C1C3=CC=CC=C3)=O	[H]C(N(C)C)=O	C1([Se]CC2=CC=CC=C2)CCCCC1	0
69	O=C(N1CCC(C(O)=O)CC1)OCC2=CC=CC=C2	C1(C[Se][Se]CC2=CC=CC=C2)=CC=CC=C1	NC(C1=CN(CC2=CC=C(C(F)(F)F)C=C2)C=CC1)=O	[H]C(N(C)C)=O	O=C(N1CCC([Se]CC2=CC=CC=C2)CC1)OCC3=CC=CC=C3	0.0495984
70	O=C(OCC1=CC=CC=C1)[C@H](NC(OC(C)(C)C)=O)CC(O)=O	C1(C[Se][Se]CC2=CC=CC=C2)=CC=CC=C1	NC(C1=CN(CC2=CC=CC=C2)C=CC1)=O	[H]C(N(C)C)=O	O=C(OCC1=CC=CC=C1)[C@H](NC(OC(C)(C)C)=O)C[Se]CC2=CC=CC=C2	0.00601089
71	O=C(OCC1=CC=CC=C1)[C@H](NC(OC(C)(C)C)=O)CC(O)=O	C1(C[Se][Se]CC2=CC=CC=C2)=CC=CC=C1	NC(C1=CN(CC2=CC=CC=C2)C=C(C(N)=O)C1C3=CC=CC=C3)=O	[H]C(N(C)C)=O	O=C(OCC1=CC=CC=C1)[C@H](NC(OC(C)(C)C)=O)C[Se]CC2=CC=CC=C2	0
72	O=C(C1CCCCC1)O	C1(C[Se][Se]CC2=CC=CC=C2)=CC=CC=C1	NC(C1=CN(CC2=CC=CC=C2)C=CC1)=O	CC#N	C1([Se]CC2=CC=CC=C2)CCCCC1	0
73	O=C(C1CCC1)O	C1(C[Se][Se]CC2=CC=CC=C2)=CC=CC=C1	NC(C1=CN(CC2=CC=CC=C2)C=CC1)=O	CC#N	C1([Se]CC2=CC=CC=C2)CCC1	0.0225236
74	O=C(C1CCC1)O	C1(C[Se][Se]CC2=CC=CC=C2)=CC=CC=C1	NC(C1=CN(CC2=CC=C(C(F)(F)F)C=C2)C=CC1)=O	CC#N	C1([Se]CC2=CC=CC=C2)CCC1	0.0156096
75	O=C(C1CCC1)O	C1(C[Se][Se]CC2=CC=CC=C2)=CC=CC=C1	NC(C1=CN(CC2=CC=CC=C2)C=C(C(N)=O)C1)=O	CC#N	C1([Se]CC2=CC=CC=C2)CCC1	0.0145459
76	CC(C1=CC=C2C=C(OC)C=CC2=C1)C(O)=O	C1(C[Se][Se]CC2=CC=CC=C2)=CC=CC=C1	NC(C1=CN(CC2=CC=CC=C2)C=CC1)=O	CC#N	CC(C1=CC=C2C=C(OC)C=CC2=C1)[Se]CC3=CC=CC=C3	0.0471642
77	CC(N(C(C1=C2C=CC=C1)=O)C2=O)C(O)=O	CC[Se][Se]CC	NC(C1=CN(CC2=CC=C(OC)C=C2)C=CC1)=O	CS(C)=O	CC(N(C(C1=C2C=CC=C1)=O)C2=O)[Se]CC	0
78	O=C(CCCC1=CNC2=C1C=CC=C2)O	CC[Se][Se]CC	NC(C1=CN(CC2=CC=CC=C2)C=CC1)=O	CS(C)=O	CC[Se]CCCC1=CNC2=C1C=CC=C2	0.435427
79	O=C(CCCC1=CNC2=C1C=CC=C2)O	CC[Se][Se]CC	NC(C1=CN(CC2=CC=C(OC)C=C2)C=CC1)=O	CS(C)=O	CC[Se]CCCC1=CNC2=C1C=CC=C2	0.529312
80	CC1=CC=C(S(N2CCC(C(O)=O)CC2)(=O)=O)C=C1	CC[Se][Se]CC	NC(C1=CN(CC2=CC=CC=C2)C=C(C(N)=O)C1)=O	CS(C)=O	CC1=CC=C(S(N2CCC([Se]CC)CC2)(=O)=O)C=C1	0.138459
81	CC(C1=CC=C(CC2C(CCC2)=O)C=C1)C(O)=O	CC[Se][Se]CC	NC(C1=CN(CC2=CC=CC=C2)C=C(C(N)=O)C1C3=CC=CC=C3)=O	CS(C)=O	CC(C1=CC=C(CC2C(CCC2)=O)C=C1)[Se]CC	0.0182695
82	CC(C1=CC=C(CC2C(CCC2)=O)C=C1)C(O)=O	CC[Se][Se]CC	NC(C1=CN(CC2=CC=C(OC)C=C2)C=CC1)=O	[H]C(N(C)C)=O	CC(C1=CC=C(CC2C(CCC2)=O)C=C1)[Se]CC	0.140148
83	CC(C1=CC=C(CC2C(CCC2)=O)C=C1)C(O)=O	CC[Se][Se]CC	NC(C1=CN(CC2=CC=CC=C2)C=C(C(N)=O)C1C3=CC=CC=C3)=O	[H]C(N(C)C)=O	CC(C1=CC=C(CC2C(CCC2)=O)C=C1)[Se]CC	0.0132745
84	CC(N1C(C2=CC=C(Cl)C=C2)=O)=C(CC(O)=O)C3=C1C=CC(OC)=C3	CC[Se][Se]CC	NC(C1=CN(CC2=CC=C(C(F)(F)F)C=C2)C=CC1)=O	[H]C(N(C)C)=O	CC(N1C(C2=CC=C(Cl)C=C2)=O)=C(C[Se]CC)C3=C1C=CC(OC)=C3	0
85	CC(N1C(C2=CC=C(Cl)C=C2)=O)=C(CC(O)=O)C3=C1C=CC(OC)=C3	CC[Se][Se]CC	NC(C1=CN(CC2=CC=CC=C2)C=C(C(N)=O)C1C3=CC=CC=C3)=O	[H]C(N(C)C)=O	CC(N1C(C2=CC=C(Cl)C=C2)=O)=C(C[Se]CC)C3=C1C=CC(OC)=C3	0.0285
86	CC(N(C(C1=C2C=CC=C1)=O)C2=O)C(O)=O	CC[Se][Se]CC	NC(C1=CN(CC2=CC=CC=C2)C=CC1)=O	CC#N	CC(N(C(C1=C2C=CC=C1)=O)C2=O)[Se]CC	0
87	CC(N(C(C1=C2C=CC=C1)=O)C2=O)C(O)=O	CC[Se][Se]CC	NC(C1=CN(CC2=CC=CC=C2)C=C(C(N)=O)C1C3=CC=CC=C3)=O	CC#N	CC(N(C(C1=C2C=CC=C1)=O)C2=O)[Se]CC	0
88	O=C(CCCC1=CNC2=C1C=CC=C2)O	CC[Se][Se]CC	NC(C1=CN(CC2=CC=C(OC)C=C2)C=CC1)=O	CC#N	CC[Se]CCCC1=CNC2=C1C=CC=C2	0.0549438
89	O=C(CCCC1=CNC2=C1C=CC=C2)O	CC[Se][Se]CC	NC(C1=CN(CC2=CC=CC=C2)C=C(C(N)=O)C1)=O	CC#N	CC[Se]CCCC1=CNC2=C1C=CC=C2	0.118482
90	O=C(CCCC1=CNC2=C1C=CC=C2)O	CC[Se][Se]CC	NC(C1=CN(CC2=CC=CC=C2)C=C(C(N)=O)C1C3=CC=CC=C3)=O	CC#N	CC[Se]CCCC1=CNC2=C1C=CC=C2	0.169753
91	O=C1C2=CC(CC(O)=O)=CC=C2OCC3=CC=CC=C13	CC[Se][Se]CC	NC(C1=CN(CC2=CC=CC=C2)C=C(C(N)=O)C1)=O	CC#N	O=C1C2=CC(C[Se]CC)=CC=C2OCC3=CC=CC=C13	0
92	O=C1C2=CC(CC(O)=O)=CC=C2OCC3=CC=CC=C13	CC[Se][Se]CC	NC(C1=CN(CC2=CC=CC=C2)C=C(C(N)=O)C1C3=CC=CC=C3)=O	CC#N	O=C1C2=CC(C[Se]CC)=CC=C2OCC3=CC=CC=C13	0
93	CC(C1=CC=C(CC2C(CCC2)=O)C=C1)C(O)=O	CC[Se][Se]CC	NC(C1=CN(CC2=CC=CC=C2)C=C(C(N)=O)C1)=O	CC#N	CC(C1=CC=C(CC2C(CCC2)=O)C=C1)[Se]CC	0.025762
94	CC(N1C(C2=CC=C(Cl)C=C2)=O)=C(CC(O)=O)C3=C1C=CC(OC)=C3	CC[Se][Se]CC	NC(C1=CN(CC2=CC=CC=C2)C=C(C(N)=O)C1C3=CC=CC=C3)=O	CC#N	CC(N1C(C2=CC=C(Cl)C=C2)=O)=C(C[Se]CC)C3=C1C=CC(OC)=C3	0
95	CC1=CC=C(CC(O)=O)C=C1	CC[Se][Se]CC	NC(C1=CN(CC2=CC=CC=C2)C=C(C(N)=O)C1)=O	CS(C)=O	CC1=CC=C(C[Se]CC)C=C1	0
96	BrC1=CC=C(CC(O)=O)C=C1	CC[Se][Se]CC	NC(C1=CN(CC2=CC=C(OC)C=C2)C=CC1)=O	CS(C)=O	BrC1=CC=C(C[Se]CC)C=C1	0.018456
97	COC1=CC=C(CC(O)=O)C=C1	CC[Se][Se]CC	NC(C1=CN(CC2=CC=CC=C2)C=CC1)=O	CS(C)=O	COC1=CC=C(C[Se]CC)C=C1	0.282558
98	O=C(CC1=CNC2=C1C=CC=C2)O	CC[Se][Se]CC	NC(C1=CN(CC2=CC=CC=C2)C=CC1)=O	CS(C)=O	CC[Se]CC1=CNC2=C1C=CC=C2	0.580806
99	O=C(CC1=CNC2=C1C=CC=C2)O	CC[Se][Se]CC	NC(C1=CN(CC2=CC=C(C(F)(F)F)C=C2)C=CC1)=O	CS(C)=O	CC[Se]CC1=CNC2=C1C=CC=C2	0.55325
100	BrC1=CC=C(CC(O)=O)C=C1	CC[Se][Se]CC	NC(C1=CN(CC2=CC=C(C(F)(F)F)C=C2)C=CC1)=O	[H]C(N(C)C)=O	BrC1=CC=C(C[Se]CC)C=C1	0
101	COC1=CC=C(CC(O)=O)C=C1	CC[Se][Se]CC	NC(C1=CN(CC2=CC=CC=C2)C=CC1)=O	[H]C(N(C)C)=O	COC1=CC=C(C[Se]CC)C=C1	0.0905168
102	COC1=CC=C(CC(O)=O)C=C1	CC[Se][Se]CC	NC(C1=CN(CC2=CC=CC=C2)C=C(C(N)=O)C1)=O	[H]C(N(C)C)=O	COC1=CC=C(C[Se]CC)C=C1	0.0494888
103	CC1=C(CC(O)=O)C=CC=C1	CC[Se][Se]CC	NC(C1=CN(CC2=CC=CC=C2)C=CC1)=O	[H]C(N(C)C)=O	CC1=C(C[Se]CC)C=CC=C1	0.007317
104	CC1=C(CC(O)=O)C=CC=C1	CC[Se][Se]CC	NC(C1=CN(CC2=CC=CC=C2)C=C(C(N)=O)C1)=O	[H]C(N(C)C)=O	CC1=C(C[Se]CC)C=CC=C1	0
105	CC1=C(CC(O)=O)C=CC=C1	CC[Se][Se]CC	NC(C1=CN(CC2=CC=CC=C2)C=C(C(N)=O)C1C3=CC=CC=C3)=O	[H]C(N(C)C)=O	CC1=C(C[Se]CC)C=CC=C1	0
106	COC1=CC=C(CC(O)=O)C=C1	CC[Se][Se]CC	NC(C1=CN(CC2=CC=CC=C2)C=C(C(N)=O)C1)=O	CC#N	COC1=CC=C(C[Se]CC)C=C1	0.0602192
107	CC1=C(CC(O)=O)C=CC=C1	CC[Se][Se]CC	NC(C1=CN(CC2=CC=CC=C2)C=CC1)=O	CC#N	CC1=C(C[Se]CC)C=CC=C1	0
108	CC1=C(CC(O)=O)C=CC=C1	CC[Se][Se]CC	NC(C1=CN(CC2=CC=CC=C2)C=C(C(N)=O)C1)=O	CC#N	CC1=C(C[Se]CC)C=CC=C1	0.0075
109	CC(C1=CC=C(CC2C(CCC2)=O)C=C1)C(O)=O	C1([Se][Se]C2=CC=CC=C2)=CC=CC=C1	NC(C1=CN(CC2=CC=C(OC)C=C2)C=CC1)=O	CS(C)=O	CC(C1=CC=C(CC2C(CCC2)=O)C=C1)[Se]C3=CC=CC=C3	0.596632
110	CC(N1C(C2=CC=C(Cl)C=C2)=O)=C(CC(O)=O)C3=C1C=CC(OC)=C3	C1([Se][Se]C2=CC=CC=C2)=CC=CC=C1	NC(C1=CN(CC2=CC=CC=C2)C=C(C(N)=O)C1)=O	CS(C)=O	CC(N1C(C2=CC=C(Cl)C=C2)=O)=C(C[Se]C3=CC=CC=C3)C4=C1C=CC(OC)=C4	0.675111
111	CC1=CC=C(CC(O)=O)C=C1	C1([Se][Se]C2=CC=CC=C2)=CC=CC=C1	NC(C1=CN(CC2=CC=CC=C2)C=CC1)=O	CS(C)=O	CC1=CC=C(C[Se]C2=CC=CC=C2)C=C1	0.772926
112	BrC1=CC=C(CC(O)=O)C=C1	C1([Se][Se]C2=CC=CC=C2)=CC=CC=C1	NC(C1=CN(CC2=CC=C(C(F)(F)F)C=C2)C=CC1)=O	CS(C)=O	BrC1=CC=C(C[Se]C2=CC=CC=C2)C=C1	0.266711
113	BrC1=CC=C(CC(O)=O)C=C1	C1([Se][Se]C2=CC=CC=C2)=CC=CC=C1	NC(C1=CN(CC2=CC=CC=C2)C=C(C(N)=O)C1)=O	CS(C)=O	BrC1=CC=C(C[Se]C2=CC=CC=C2)C=C1	0.241536
114	COC1=CC=C(CC(O)=O)C=C1	C1([Se][Se]C2=CC=CC=C2)=CC=CC=C1	NC(C1=CN(CC2=CC=CC=C2)C=C(C(N)=O)C1C3=CC=CC=C3)=O	CS(C)=O	COC1=CC=C(C[Se]C2=CC=CC=C2)C=C1	0
115	CC1=C(CC(O)=O)C=CC=C1	C1([Se][Se]C2=CC=CC=C2)=CC=CC=C1	NC(C1=CN(CC2=CC=C(OC)C=C2)C=CC1)=O	CS(C)=O	CC1=C(C[Se]C2=CC=CC=C2)C=CC=C1	0.261432
116	CC1=C(CC(O)=O)C=CC=C1	C1([Se][Se]C2=CC=CC=C2)=CC=CC=C1	NC(C1=CN(CC2=CC=CC=C2)C=C(C(N)=O)C1C3=CC=CC=C3)=O	CS(C)=O	CC1=C(C[Se]C2=CC=CC=C2)C=CC=C1	0
117	O=C(CCCC1=CNC2=C1C=CC=C2)O	C1([Se][Se]C2=CC=CC=C2)=CC=CC=C1	NC(C1=CN(CC2=CC=C(OC)C=C2)C=CC1)=O	CS(C)=O	C1(CCC[Se]C2=CC=CC=C2)=CNC3=C1C=CC=C3	0.731551
118	FC1(F)CCC(C(O)=O)CC1	C1([Se][Se]C2=CC=CC=C2)=CC=CC=C1	NC(C1=CN(CC2=CC=C(OC)C=C2)C=CC1)=O	CS(C)=O	FC1(F)CCC([Se]C2=CC=CC=C2)CC1	0.258989
119	FC1(F)CCC(C(O)=O)CC1	C1([Se][Se]C2=CC=CC=C2)=CC=CC=C1	NC(C1=CN(CC2=CC=C(C(F)(F)F)C=C2)C=CC1)=O	CS(C)=O	FC1(F)CCC([Se]C2=CC=CC=C2)CC1	0.275794
120	O=C(C1CCOCC1)O	C1([Se][Se]C2=CC=CC=C2)=CC=CC=C1	NC(C1=CN(CC2=CC=CC=C2)C=CC1)=O	CS(C)=O	C1([Se]C2=CC=CC=C2)CCOCC1	0.869418
121	O=C(N1CCC(C(O)=O)CC1)OCC2=CC=CC=C2	C1([Se][Se]C2=CC=CC=C2)=CC=CC=C1	NC(C1=CN(CC2=CC=CC=C2)C=CC1)=O	CS(C)=O	O=C(N1CCC([Se]C2=CC=CC=C2)CC1)OCC3=CC=CC=C3	0.879044
122	O=C(N1CCC(C(O)=O)CC1)OCC2=CC=CC=C2	C1([Se][Se]C2=CC=CC=C2)=CC=CC=C1	NC(C1=CN(CC2=CC=CC=C2)C=C(C(N)=O)C1C3=CC=CC=C3)=O	CS(C)=O	O=C(N1CCC([Se]C2=CC=CC=C2)CC1)OCC3=CC=CC=C3	0.650005
123	O=C(OCC1=CC=CC=C1)[C@H](NC(OC(C)(C)C)=O)CC(O)=O	C1([Se][Se]C2=CC=CC=C2)=CC=CC=C1	NC(C1=CN(CC2=CC=CC=C2)C=CC1)=O	CS(C)=O	O=C(OCC1=CC=CC=C1)[C@H](NC(OC(C)(C)C)=O)C[Se]C2=CC=CC=C2	0.871815
124	O=C(OCC1=CC=CC=C1)[C@H](NC(OC(C)(C)C)=O)CC(O)=O	C1([Se][Se]C2=CC=CC=C2)=CC=CC=C1	NC(C1=CN(CC2=CC=C(C(F)(F)F)C=C2)C=CC1)=O	CS(C)=O	O=C(OCC1=CC=CC=C1)[C@H](NC(OC(C)(C)C)=O)C[Se]C2=CC=CC=C2	0.812668
125	O=C(C1CCC1)O	C1([Se][Se]C2=CC=CC=C2)=CC=CC=C1	NC(C1=CN(CC2=CC=CC=C2)C=C(C(N)=O)C1C3=CC=CC=C3)=O	CS(C)=O	C1([Se]C2=CC=CC=C2)CCC1	0.483041
126	CC(C1=CC=C2C=C(OC)C=CC2=C1)C(O)=O	C1([Se][Se]C2=CC=CC=C2)=CC=CC=C1	NC(C1=CN(CC2=CC=C(C(F)(F)F)C=C2)C=CC1)=O	CS(C)=O	CC(C1=CC=C2C=C(OC)C=CC2=C1)[Se]C3=CC=CC=C3	0.621643
127	O=C(CCCC1=CNC2=C1C=CC=C2)O	C1([Se][Se]C2=CC=CC=C2)=CC=CC=C1	NC(C1=CN(CC2=CC=CC=C2)C=C(C(N)=O)C1C3=CC=CC=C3)=O	[H]C(N(C)C)=O	C1(CCC[Se]C2=CC=CC=C2)=CNC3=C1C=CC=C3	0.091216
128	CC1=CC=C(S(N2CCC(C(O)=O)CC2)(=O)=O)C=C1	C1([Se][Se]C2=CC=CC=C2)=CC=CC=C1	NC(C1=CN(CC2=CC=CC=C2)C=CC1)=O	[H]C(N(C)C)=O	CC1=CC=C(S(N2CCC([Se]C3=CC=CC=C3)CC2)(=O)=O)C=C1	0.532919
129	O=C(CCC1=CC=CC=C1)O	C1([Se][Se]C2=CC=CC=C2)=CC=CC=C1	NC(C1=CN(CC2=CC=CC=C2)C=C(C(N)=O)C1C3=CC=CC=C3)=O	[H]C(N(C)C)=O	C1(CC[Se]C2=CC=CC=C2)=CC=CC=C1	0
130	CC(C1=CC=C(CC2C(CCC2)=O)C=C1)C(O)=O	C1([Se][Se]C2=CC=CC=C2)=CC=CC=C1	NC(C1=CN(CC2=CC=C(C(F)(F)F)C=C2)C=CC1)=O	[H]C(N(C)C)=O	CC(C1=CC=C(CC2C(CCC2)=O)C=C1)[Se]C3=CC=CC=C3	0.545201
131	CC(C1=CC=C(CC2C(CCC2)=O)C=C1)C(O)=O	C1([Se][Se]C2=CC=CC=C2)=CC=CC=C1	NC(C1=CN(CC2=CC=CC=C2)C=C(C(N)=O)C1)=O	[H]C(N(C)C)=O	CC(C1=CC=C(CC2C(CCC2)=O)C=C1)[Se]C3=CC=CC=C3	0.335969
132	BrC1=CC=C(CC(O)=O)C=C1	C1([Se][Se]C2=CC=CC=C2)=CC=CC=C1	NC(C1=CN(CC2=CC=CC=C2)C=CC1)=O	[H]C(N(C)C)=O	BrC1=CC=C(C[Se]C2=CC=CC=C2)C=C1	0.422796
133	BrC1=CC=C(CC(O)=O)C=C1	C1([Se][Se]C2=CC=CC=C2)=CC=CC=C1	NC(C1=CN(CC2=CC=CC=C2)C=C(C(N)=O)C1)=O	[H]C(N(C)C)=O	BrC1=CC=C(C[Se]C2=CC=CC=C2)C=C1	0.341726
134	BrC1=CC=C(CC(O)=O)C=C1	C1([Se][Se]C2=CC=CC=C2)=CC=CC=C1	NC(C1=CN(CC2=CC=CC=C2)C=C(C(N)=O)C1C3=CC=CC=C3)=O	[H]C(N(C)C)=O	BrC1=CC=C(C[Se]C2=CC=CC=C2)C=C1	0.227438
135	COC1=CC=C(CC(O)=O)C=C1	C1([Se][Se]C2=CC=CC=C2)=CC=CC=C1	NC(C1=CN(CC2=CC=C(OC)C=C2)C=CC1)=O	[H]C(N(C)C)=O	COC1=CC=C(C[Se]C2=CC=CC=C2)C=C1	0.678428
136	O=C(C1CCOCC1)O	C1([Se][Se]C2=CC=CC=C2)=CC=CC=C1	NC(C1=CN(CC2=CC=C(OC)C=C2)C=CC1)=O	[H]C(N(C)C)=O	C1([Se]C2=CC=CC=C2)CCOCC1	0.770298
137	O=C(N1CCC(C(O)=O)CC1)OCC2=CC=CC=C2	C1([Se][Se]C2=CC=CC=C2)=CC=CC=C1	NC(C1=CN(CC2=CC=C(C(F)(F)F)C=C2)C=CC1)=O	[H]C(N(C)C)=O	O=C(N1CCC([Se]C2=CC=CC=C2)CC1)OCC3=CC=CC=C3	0.862144
138	O=C(OCC1=CC=CC=C1)[C@H](NC(OC(C)(C)C)=O)CC(O)=O	C1([Se][Se]C2=CC=CC=C2)=CC=CC=C1	NC(C1=CN(CC2=CC=C(OC)C=C2)C=CC1)=O	[H]C(N(C)C)=O	O=C(OCC1=CC=CC=C1)[C@H](NC(OC(C)(C)C)=O)C[Se]C2=CC=CC=C2	0.85502
139	CC(C1=CC=C2C=C(OC)C=CC2=C1)C(O)=O	C1([Se][Se]C2=CC=CC=C2)=CC=CC=C1	NC(C1=CN(CC2=CC=CC=C2)C=C(C(N)=O)C1C3=CC=CC=C3)=O	[H]C(N(C)C)=O	CC(C1=CC=C2C=C(OC)C=CC2=C1)[Se]C3=CC=CC=C3	0.318711
140	O=C(C1(C2=CC=CC=C2)CC1)O	C1([Se][Se]C2=CC=CC=C2)=CC=CC=C1	NC(C1=CN(CC2=CC=CC=C2)C=C(C(N)=O)C1)=O	[H]C(N(C)C)=O	C1(C2([Se]C3=CC=CC=C3)CC2)=CC=CC=C1	0
141	CC1=CC=C(S(N2CCC(C(O)=O)CC2)(=O)=O)C=C1	C1([Se][Se]C2=CC=CC=C2)=CC=CC=C1	NC(C1=CN(CC2=CC=C(OC)C=C2)C=CC1)=O	CC#N	CC1=CC=C(S(N2CCC([Se]C3=CC=CC=C3)CC2)(=O)=O)C=C1	0.99
142	O=C1C2=CC(CC(O)=O)=CC=C2OCC3=CC=CC=C13	C1([Se][Se]C2=CC=CC=C2)=CC=CC=C1	NC(C1=CN(CC2=CC=CC=C2)C=CC1)=O	CC#N	O=C1C2=CC(C[Se]C3=CC=CC=C3)=CC=C2OCC4=CC=CC=C14	0.578226
143	CC(N1C(C2=CC=C(Cl)C=C2)=O)=C(CC(O)=O)C3=C1C=CC(OC)=C3	C1([Se][Se]C2=CC=CC=C2)=CC=CC=C1	NC(C1=CN(CC2=CC=CC=C2)C=CC1)=O	CC#N	CC(N1C(C2=CC=C(Cl)C=C2)=O)=C(C[Se]C3=CC=CC=C3)C4=C1C=CC(OC)=C4	0.535651
144	CC1=CC=C(CC(O)=O)C=C1	C1([Se][Se]C2=CC=CC=C2)=CC=CC=C1	NC(C1=CN(CC2=CC=CC=C2)C=CC1)=O	CC#N	CC1=CC=C(C[Se]C2=CC=CC=C2)C=C1	0.142455
145	COC1=CC=C(CC(O)=O)C=C1	C1([Se][Se]C2=CC=CC=C2)=CC=CC=C1	NC(C1=CN(CC2=CC=CC=C2)C=CC1)=O	CC#N	COC1=CC=C(C[Se]C2=CC=CC=C2)C=C1	0.198275
146	CC1=C(CC(O)=O)C=CC=C1	C1([Se][Se]C2=CC=CC=C2)=CC=CC=C1	NC(C1=CN(CC2=CC=CC=C2)C=CC1)=O	CC#N	CC1=C(C[Se]C2=CC=CC=C2)C=CC=C1	0.2063
147	CC1=C(CC(O)=O)C=CC=C1	C1([Se][Se]C2=CC=CC=C2)=CC=CC=C1	NC(C1=CN(CC2=CC=CC=C2)C=C(C(N)=O)C1C3=CC=CC=C3)=O	CC#N	CC1=C(C[Se]C2=CC=CC=C2)C=CC=C1	0
148	O=C(C1CCOCC1)O	C1([Se][Se]C2=CC=CC=C2)=CC=CC=C1	NC(C1=CN(CC2=CC=C(C(F)(F)F)C=C2)C=CC1)=O	CC#N	C1([Se]C2=CC=CC=C2)CCOCC1	0.03
149	O=C(N1CCC(C(O)=O)CC1)OCC2=CC=CC=C2	C1([Se][Se]C2=CC=CC=C2)=CC=CC=C1	NC(C1=CN(CC2=CC=C(OC)C=C2)C=CC1)=O	CC#N	O=C(N1CCC([Se]C2=CC=CC=C2)CC1)OCC3=CC=CC=C3	0.680556
150	O=C(N1CCC(C(O)=O)CC1)OCC2=CC=CC=C2	C1([Se][Se]C2=CC=CC=C2)=CC=CC=C1	NC(C1=CN(CC2=CC=CC=C2)C=C(C(N)=O)C1C3=CC=CC=C3)=O	CC#N	O=C(N1CCC([Se]C2=CC=CC=C2)CC1)OCC3=CC=CC=C3	0.070848
151	O=C(C1CCC1)O	C1([Se][Se]C2=CC=CC=C2)=CC=CC=C1	NC(C1=CN(CC2=CC=CC=C2)C=C(C(N)=O)C1C3=CC=CC=C3)=O	CC#N	C1([Se]C2=CC=CC=C2)CCC1	0.0076212
152	O=C(C1(C2=CC=CC=C2)CC1)O	C1([Se][Se]C2=CC=CC=C2)=CC=CC=C1	NC(C1=CN(CC2=CC=C(C(F)(F)F)C=C2)C=CC1)=O	CC#N	C1(C2([Se]C3=CC=CC=C3)CC2)=CC=CC=C1	0.233343
153	O=C(C1(C2=CC=CC=C2)CC1)O	C1([Se][Se]C2=CC=CC=C2)=CC=CC=C1	NC(C1=CN(CC2=CC=CC=C2)C=C(C(N)=O)C1)=O	CC#N	C1(C2([Se]C3=CC=CC=C3)CC2)=CC=CC=C1	0.0870504
154	CC(N(C(C1=C2C=CC=C1)=O)C2=O)C(O)=O	C1(C[Se][Se]CC2=CC=CC=C2)=CC=CC=C1	NC(C1=CN(CC2=CC=CC=C2)C=CC1)=O	CS(C)=O	CC(N(C(C1=C2C=CC=C1)=O)C2=O)[Se]CC3=CC=CC=C3	0.258731
155	CC(N(C(C1=C2C=CC=C1)=O)C2=O)C(O)=O	C1(C[Se][Se]CC2=CC=CC=C2)=CC=CC=C1	NC(C1=CN(CC2=CC=C(OC)C=C2)C=CC1)=O	CS(C)=O	CC(N(C(C1=C2C=CC=C1)=O)C2=O)[Se]CC3=CC=CC=C3	0.326558
156	CC(N(C(C1=C2C=CC=C1)=O)C2=O)C(O)=O	C1(C[Se][Se]CC2=CC=CC=C2)=CC=CC=C1	NC(C1=CN(CC2=CC=CC=C2)C=C(C(N)=O)C1C3=CC=CC=C3)=O	CS(C)=O	CC(N(C(C1=C2C=CC=C1)=O)C2=O)[Se]CC3=CC=CC=C3	0.161164
157	CC1=CC=C(S(N2CCC(C(O)=O)CC2)(=O)=O)C=C1	C1(C[Se][Se]CC2=CC=CC=C2)=CC=CC=C1	NC(C1=CN(CC2=CC=C(C(F)(F)F)C=C2)C=CC1)=O	CS(C)=O	CC1=CC=C(S(N2CCC([Se]CC3=CC=CC=C3)CC2)(=O)=O)C=C1	0.08914
158	O=C1C2=CC(CC(O)=O)=CC=C2OCC3=CC=CC=C13	C1(C[Se][Se]CC2=CC=CC=C2)=CC=CC=C1	NC(C1=CN(CC2=CC=CC=C2)C=CC1)=O	CS(C)=O	O=C1C2=CC(C[Se]CC3=CC=CC=C3)=CC=C2OCC4=CC=CC=C14	0.279686
159	CC(C1=CC=C(CC2C(CCC2)=O)C=C1)C(O)=O	C1(C[Se][Se]CC2=CC=CC=C2)=CC=CC=C1	NC(C1=CN(CC2=CC=CC=C2)C=C(C(N)=O)C1)=O	CS(C)=O	CC(C1=CC=C(CC2C(CCC2)=O)C=C1)[Se]CC3=CC=CC=C3	0.0083612
160	CC(C1=CC=C(CC2C(CCC2)=O)C=C1)C(O)=O	C1(C[Se][Se]CC2=CC=CC=C2)=CC=CC=C1	NC(C1=CN(CC2=CC=CC=C2)C=C(C(N)=O)C1C3=CC=CC=C3)=O	CS(C)=O	CC(C1=CC=C(CC2C(CCC2)=O)C=C1)[Se]CC3=CC=CC=C3	0
161	CC(N(C(C1=C2C=CC=C1)=O)C2=O)C(O)=O	C1(C[Se][Se]CC2=CC=CC=C2)=CC=CC=C1	NC(C1=CN(CC2=CC=C(OC)C=C2)C=CC1)=O	[H]C(N(C)C)=O	CC(N(C(C1=C2C=CC=C1)=O)C2=O)[Se]CC3=CC=CC=C3	0.236296
162	CC(N(C(C1=C2C=CC=C1)=O)C2=O)C(O)=O	C1(C[Se][Se]CC2=CC=CC=C2)=CC=CC=C1	NC(C1=CN(CC2=CC=C(C(F)(F)F)C=C2)C=CC1)=O	[H]C(N(C)C)=O	CC(N(C(C1=C2C=CC=C1)=O)C2=O)[Se]CC3=CC=CC=C3	0.140294
163	CC(N(C(C1=C2C=CC=C1)=O)C2=O)C(O)=O	C1(C[Se][Se]CC2=CC=CC=C2)=CC=CC=C1	NC(C1=CN(CC2=CC=CC=C2)C=C(C(N)=O)C1)=O	[H]C(N(C)C)=O	CC(N(C(C1=C2C=CC=C1)=O)C2=O)[Se]CC3=CC=CC=C3	0.098032
164	O=C(CCCC1=CNC2=C1C=CC=C2)O	C1(C[Se][Se]CC2=CC=CC=C2)=CC=CC=C1	NC(C1=CN(CC2=CC=CC=C2)C=C(C(N)=O)C1C3=CC=CC=C3)=O	[H]C(N(C)C)=O	C1(CCC[Se]CC2=CC=CC=C2)=CNC3=C1C=CC=C3	0.0239199
165	CC1=CC=C(S(N2CCC(C(O)=O)CC2)(=O)=O)C=C1	C1(C[Se][Se]CC2=CC=CC=C2)=CC=CC=C1	NC(C1=CN(CC2=CC=CC=C2)C=CC1)=O	[H]C(N(C)C)=O	CC1=CC=C(S(N2CCC([Se]CC3=CC=CC=C3)CC2)(=O)=O)C=C1	0.11873
166	CC1=CC=C(S(N2CCC(C(O)=O)CC2)(=O)=O)C=C1	C1(C[Se][Se]CC2=CC=CC=C2)=CC=CC=C1	NC(C1=CN(CC2=CC=CC=C2)C=C(C(N)=O)C1)=O	[H]C(N(C)C)=O	CC1=CC=C(S(N2CCC([Se]CC3=CC=CC=C3)CC2)(=O)=O)C=C1	0.0421288
167	CC(C1=CC=C(CC2C(CCC2)=O)C=C1)C(O)=O	C1(C[Se][Se]CC2=CC=CC=C2)=CC=CC=C1	NC(C1=CN(CC2=CC=C(C(F)(F)F)C=C2)C=CC1)=O	[H]C(N(C)C)=O	CC(C1=CC=C(CC2C(CCC2)=O)C=C1)[Se]CC3=CC=CC=C3	0
168	CC1=CC=C(S(N2CCC(C(O)=O)CC2)(=O)=O)C=C1	C1(C[Se][Se]CC2=CC=CC=C2)=CC=CC=C1	NC(C1=CN(CC2=CC=CC=C2)C=C(C(N)=O)C1C3=CC=CC=C3)=O	CC#N	CC1=CC=C(S(N2CCC([Se]CC3=CC=CC=C3)CC2)(=O)=O)C=C1	0
169	CC(C1=CC=C(CC2C(CCC2)=O)C=C1)C(O)=O	C1(C[Se][Se]CC2=CC=CC=C2)=CC=CC=C1	NC(C1=CN(CC2=CC=CC=C2)C=C(C(N)=O)C1)=O	CC#N	CC(C1=CC=C(CC2C(CCC2)=O)C=C1)[Se]CC3=CC=CC=C3	0.012167
170	CC(N1C(C2=CC=C(Cl)C=C2)=O)=C(CC(O)=O)C3=C1C=CC(OC)=C3	C1(C[Se][Se]CC2=CC=CC=C2)=CC=CC=C1	NC(C1=CN(CC2=CC=C(C(F)(F)F)C=C2)C=CC1)=O	CC#N	CC(N1C(C2=CC=C(Cl)C=C2)=O)=C(C[Se]CC3=CC=CC=C3)C4=C1C=CC(OC)=C4	0
171	CC(N1C(C2=CC=C(Cl)C=C2)=O)=C(CC(O)=O)C3=C1C=CC(OC)=C3	C1(C[Se][Se]CC2=CC=CC=C2)=CC=CC=C1	NC(C1=CN(CC2=CC=CC=C2)C=C(C(N)=O)C1)=O	CC#N	CC(N1C(C2=CC=C(Cl)C=C2)=O)=C(C[Se]CC3=CC=CC=C3)C4=C1C=CC(OC)=C4	0
172	O=C(C1CCCCC1)O	C1(C[Se][Se]CC2=CC=CC=C2)=CC=CC=C1	NC(C1=CN(CC2=CC=C(C(F)(F)F)C=C2)C=CC1)=O	CS(C)=O	C1([Se]CC2=CC=CC=C2)CCCCC1	0.0314784
173	O=C(N1CCC(C(O)=O)CC1)OCC2=CC=CC=C2	C1(C[Se][Se]CC2=CC=CC=C2)=CC=CC=C1	NC(C1=CN(CC2=CC=C(C(F)(F)F)C=C2)C=CC1)=O	CS(C)=O	O=C(N1CCC([Se]CC2=CC=CC=C2)CC1)OCC3=CC=CC=C3	0.048279
174	O=C(OCC1=CC=CC=C1)[C@H](NC(OC(C)(C)C)=O)CC(O)=O	C1(C[Se][Se]CC2=CC=CC=C2)=CC=CC=C1	NC(C1=CN(CC2=CC=CC=C2)C=CC1)=O	CS(C)=O	O=C(OCC1=CC=CC=C1)[C@H](NC(OC(C)(C)C)=O)C[Se]CC2=CC=CC=C2	0.044813
175	O=C(OCC1=CC=CC=C1)[C@H](NC(OC(C)(C)C)=O)CC(O)=O	C1(C[Se][Se]CC2=CC=CC=C2)=CC=CC=C1	NC(C1=CN(CC2=CC=CC=C2)C=C(C(N)=O)C1C3=CC=CC=C3)=O	CS(C)=O	O=C(OCC1=CC=CC=C1)[C@H](NC(OC(C)(C)C)=O)C[Se]CC2=CC=CC=C2	0.0081975
176	O=C(C1CCC1)O	C1(C[Se][Se]CC2=CC=CC=C2)=CC=CC=C1	NC(C1=CN(CC2=CC=C(C(F)(F)F)C=C2)C=CC1)=O	CS(C)=O	C1([Se]CC2=CC=CC=C2)CCC1	0.0475206
177	O=C(C1CCC1)O	C1(C[Se][Se]CC2=CC=CC=C2)=CC=CC=C1	NC(C1=CN(CC2=CC=CC=C2)C=C(C(N)=O)C1)=O	CS(C)=O	C1([Se]CC2=CC=CC=C2)CCC1	0.0118867
178	CC(C1=CC=C2C=C(OC)C=CC2=C1)C(O)=O	C1(C[Se][Se]CC2=CC=CC=C2)=CC=CC=C1	NC(C1=CN(CC2=CC=CC=C2)C=CC1)=O	CS(C)=O	CC(C1=CC=C2C=C(OC)C=CC2=C1)[Se]CC3=CC=CC=C3	0.0466375
179	O=C(N1CCC(C(O)=O)CC1)OCC2=CC=CC=C2	C1(C[Se][Se]CC2=CC=CC=C2)=CC=CC=C1	NC(C1=CN(CC2=CC=CC=C2)C=CC1)=O	[H]C(N(C)C)=O	O=C(N1CCC([Se]CC2=CC=CC=C2)CC1)OCC3=CC=CC=C3	0.0495984
180	O=C(N1CCC(C(O)=O)CC1)OCC2=CC=CC=C2	C1(C[Se][Se]CC2=CC=CC=C2)=CC=CC=C1	NC(C1=CN(CC2=CC=C(OC)C=C2)C=CC1)=O	[H]C(N(C)C)=O	O=C(N1CCC([Se]CC2=CC=CC=C2)CC1)OCC3=CC=CC=C3	0.0654312
181	O=C(N1CCC(C(O)=O)CC1)OCC2=CC=CC=C2	C1(C[Se][Se]CC2=CC=CC=C2)=CC=CC=C1	NC(C1=CN(CC2=CC=CC=C2)C=C(C(N)=O)C1)=O	[H]C(N(C)C)=O	O=C(N1CCC([Se]CC2=CC=CC=C2)CC1)OCC3=CC=CC=C3	0.015294
182	O=C(N1CCC(C(O)=O)CC1)OCC2=CC=CC=C2	C1(C[Se][Se]CC2=CC=CC=C2)=CC=CC=C1	NC(C1=CN(CC2=CC=CC=C2)C=C(C(N)=O)C1C3=CC=CC=C3)=O	[H]C(N(C)C)=O	O=C(N1CCC([Se]CC2=CC=CC=C2)CC1)OCC3=CC=CC=C3	0.0159537
183	O=C(C1CCC1)O	C1(C[Se][Se]CC2=CC=CC=C2)=CC=CC=C1	NC(C1=CN(CC2=CC=CC=C2)C=CC1)=O	[H]C(N(C)C)=O	C1([Se]CC2=CC=CC=C2)CCC1	0.0215908
184	O=C(C1CCC1)O	C1(C[Se][Se]CC2=CC=CC=C2)=CC=CC=C1	NC(C1=CN(CC2=CC=CC=C2)C=C(C(N)=O)C1C3=CC=CC=C3)=O	[H]C(N(C)C)=O	C1([Se]CC2=CC=CC=C2)CCC1	0
185	O=C(N1CCC(C(O)=O)CC1)OCC2=CC=CC=C2	C1(C[Se][Se]CC2=CC=CC=C2)=CC=CC=C1	NC(C1=CN(CC2=CC=C(OC)C=C2)C=CC1)=O	CC#N	O=C(N1CCC([Se]CC2=CC=CC=C2)CC1)OCC3=CC=CC=C3	0.0251895
186	O=C(N1CCC(C(O)=O)CC1)OCC2=CC=CC=C2	C1(C[Se][Se]CC2=CC=CC=C2)=CC=CC=C1	NC(C1=CN(CC2=CC=C(C(F)(F)F)C=C2)C=CC1)=O	CC#N	O=C(N1CCC([Se]CC2=CC=CC=C2)CC1)OCC3=CC=CC=C3	0.0100164
187	O=C(OCC1=CC=CC=C1)[C@H](NC(OC(C)(C)C)=O)CC(O)=O	C1(C[Se][Se]CC2=CC=CC=C2)=CC=CC=C1	NC(C1=CN(CC2=CC=C(C(F)(F)F)C=C2)C=CC1)=O	CC#N	O=C(OCC1=CC=CC=C1)[C@H](NC(OC(C)(C)C)=O)C[Se]CC2=CC=CC=C2	0.0440101
188	O=C(OCC1=CC=CC=C1)[C@H](NC(OC(C)(C)C)=O)CC(O)=O	C1(C[Se][Se]CC2=CC=CC=C2)=CC=CC=C1	NC(C1=CN(CC2=CC=CC=C2)C=C(C(N)=O)C1)=O	CC#N	O=C(OCC1=CC=CC=C1)[C@H](NC(OC(C)(C)C)=O)C[Se]CC2=CC=CC=C2	0
189	CC(N(C(C1=C2C=CC=C1)=O)C2=O)C(O)=O	CC[Se][Se]CC	NC(C1=CN(CC2=CC=CC=C2)C=CC1)=O	CS(C)=O	CC(N(C(C1=C2C=CC=C1)=O)C2=O)[Se]CC	0
190	CC(C1=CC=C(CC2C(CCC2)=O)C=C1)C(O)=O	CC[Se][Se]CC	NC(C1=CN(CC2=CC=CC=C2)C=CC1)=O	CS(C)=O	CC(C1=CC=C(CC2C(CCC2)=O)C=C1)[Se]CC	0.262026
191	CC(C1=CC=C(CC2C(CCC2)=O)C=C1)C(O)=O	CC[Se][Se]CC	NC(C1=CN(CC2=CC=C(OC)C=C2)C=CC1)=O	CS(C)=O	CC(C1=CC=C(CC2C(CCC2)=O)C=C1)[Se]CC	0.291996
192	CC(N1C(C2=CC=C(Cl)C=C2)=O)=C(CC(O)=O)C3=C1C=CC(OC)=C3	CC[Se][Se]CC	NC(C1=CN(CC2=CC=C(OC)C=C2)C=CC1)=O	CS(C)=O	CC(N1C(C2=CC=C(Cl)C=C2)=O)=C(C[Se]CC)C3=C1C=CC(OC)=C3	0.181193
193	CC(N1C(C2=CC=C(Cl)C=C2)=O)=C(CC(O)=O)C3=C1C=CC(OC)=C3	CC[Se][Se]CC	NC(C1=CN(CC2=CC=CC=C2)C=C(C(N)=O)C1)=O	CS(C)=O	CC(N1C(C2=CC=C(Cl)C=C2)=O)=C(C[Se]CC)C3=C1C=CC(OC)=C3	0.162438
194	O=C1C2=CC(CC(O)=O)=CC=C2OCC3=CC=CC=C13	CC[Se][Se]CC	NC(C1=CN(CC2=CC=CC=C2)C=CC1)=O	[H]C(N(C)C)=O	O=C1C2=CC(C[Se]CC)=CC=C2OCC3=CC=CC=C13	0
195	O=C1C2=CC(CC(O)=O)=CC=C2OCC3=CC=CC=C13	CC[Se][Se]CC	NC(C1=CN(CC2=CC=CC=C2)C=C(C(N)=O)C1)=O	[H]C(N(C)C)=O	O=C1C2=CC(C[Se]CC)=CC=C2OCC3=CC=CC=C13	0
196	CC(C1=CC=C(CC2C(CCC2)=O)C=C1)C(O)=O	CC[Se][Se]CC	NC(C1=CN(CC2=CC=CC=C2)C=CC1)=O	[H]C(N(C)C)=O	CC(C1=CC=C(CC2C(CCC2)=O)C=C1)[Se]CC	0.131822
197	CC(C1=CC=C(CC2C(CCC2)=O)C=C1)C(O)=O	CC[Se][Se]CC	NC(C1=CN(CC2=CC=CC=C2)C=C(C(N)=O)C1)=O	[H]C(N(C)C)=O	CC(C1=CC=C(CC2C(CCC2)=O)C=C1)[Se]CC	0.133654
198	CC(N(C(C1=C2C=CC=C1)=O)C2=O)C(O)=O	CC[Se][Se]CC	NC(C1=CN(CC2=CC=C(OC)C=C2)C=CC1)=O	CC#N	CC(N(C(C1=C2C=CC=C1)=O)C2=O)[Se]CC	0
199	CC1=CC=C(S(N2CCC(C(O)=O)CC2)(=O)=O)C=C1	CC[Se][Se]CC	NC(C1=CN(CC2=CC=C(OC)C=C2)C=CC1)=O	CC#N	CC1=CC=C(S(N2CCC([Se]CC)CC2)(=O)=O)C=C1	0.0082048
200	O=C1C2=CC(CC(O)=O)=CC=C2OCC3=CC=CC=C13	CC[Se][Se]CC	NC(C1=CN(CC2=CC=CC=C2)C=CC1)=O	CC#N	O=C1C2=CC(C[Se]CC)=CC=C2OCC3=CC=CC=C13	0
201	CC1=CC=C(CC(O)=O)C=C1	CC[Se][Se]CC	NC(C1=CN(CC2=CC=CC=C2)C=CC1)=O	CS(C)=O	CC1=CC=C(C[Se]CC)C=C1	0.118274
202	CC1=CC=C(CC(O)=O)C=C1	CC[Se][Se]CC	NC(C1=CN(CC2=CC=CC=C2)C=C(C(N)=O)C1C3=CC=CC=C3)=O	CS(C)=O	CC1=CC=C(C[Se]CC)C=C1	0.0170032
203	COC1=CC=C(CC(O)=O)C=C1	CC[Se][Se]CC	NC(C1=CN(CC2=CC=C(OC)C=C2)C=CC1)=O	CS(C)=O	COC1=CC=C(C[Se]CC)C=C1	0.318536
204	CC1=C(CC(O)=O)C=CC=C1	CC[Se][Se]CC	NC(C1=CN(CC2=CC=CC=C2)C=C(C(N)=O)C1)=O	CS(C)=O	CC1=C(C[Se]CC)C=CC=C1	0.22
205	O=C(CC1=CNC2=C1C=CC=C2)O	CC[Se][Se]CC	NC(C1=CN(CC2=CC=CC=C2)C=C(C(N)=O)C1C3=CC=CC=C3)=O	CS(C)=O	CC[Se]CC1=CNC2=C1C=CC=C2	0.194015
206	CC1=CC=C(CC(O)=O)C=C1	CC[Se][Se]CC	NC(C1=CN(CC2=CC=CC=C2)C=CC1)=O	[H]C(N(C)C)=O	CC1=CC=C(C[Se]CC)C=C1	0.0525136
207	COC1=CC=C(CC(O)=O)C=C1	CC[Se][Se]CC	NC(C1=CN(CC2=CC=C(OC)C=C2)C=CC1)=O	[H]C(N(C)C)=O	COC1=CC=C(C[Se]CC)C=C1	0.059588
208	COC1=CC=C(CC(O)=O)C=C1	CC[Se][Se]CC	NC(C1=CN(CC2=CC=C(C(F)(F)F)C=C2)C=CC1)=O	[H]C(N(C)C)=O	COC1=CC=C(C[Se]CC)C=C1	0.069056
209	O=C(CC1=CNC2=C1C=CC=C2)O	CC[Se][Se]CC	NC(C1=CN(CC2=CC=CC=C2)C=CC1)=O	[H]C(N(C)C)=O	CC[Se]CC1=CNC2=C1C=CC=C2	0.014725
210	CC1=CC=C(CC(O)=O)C=C1	CC[Se][Se]CC	NC(C1=CN(CC2=CC=CC=C2)C=C(C(N)=O)C1)=O	CC#N	CC1=CC=C(C[Se]CC)C=C1	0
211	CC1=CC=C(CC(O)=O)C=C1	CC[Se][Se]CC	NC(C1=CN(CC2=CC=CC=C2)C=C(C(N)=O)C1C3=CC=CC=C3)=O	CC#N	CC1=CC=C(C[Se]CC)C=C1	0
212	CC1=C(CC(O)=O)C=CC=C1	CC[Se][Se]CC	NC(C1=CN(CC2=CC=C(C(F)(F)F)C=C2)C=CC1)=O	CC#N	CC1=C(C[Se]CC)C=CC=C1	0.06125
213	CC(C1=CC=C(CC2C(CCC2)=O)C=C1)C(O)=O	C1([Se][Se]C2=CC=CC=C2)=CC=CC=C1	NC(C1=CN(CC2=CC=CC=C2)C=C(C(N)=O)C1)=O	CS(C)=O	CC(C1=CC=C(CC2C(CCC2)=O)C=C1)[Se]C3=CC=CC=C3	0.592785
214	CC(C1=CC=C(CC2C(CCC2)=O)C=C1)C(O)=O	C1([Se][Se]C2=CC=CC=C2)=CC=CC=C1	NC(C1=CN(CC2=CC=CC=C2)C=C(C(N)=O)C1C3=CC=CC=C3)=O	CS(C)=O	CC(C1=CC=C(CC2C(CCC2)=O)C=C1)[Se]C3=CC=CC=C3	0.37
215	CC(N1C(C2=CC=C(Cl)C=C2)=O)=C(CC(O)=O)C3=C1C=CC(OC)=C3	C1([Se][Se]C2=CC=CC=C2)=CC=CC=C1	NC(C1=CN(CC2=CC=C(OC)C=C2)C=CC1)=O	CS(C)=O	CC(N1C(C2=CC=C(Cl)C=C2)=O)=C(C[Se]C3=CC=CC=C3)C4=C1C=CC(OC)=C4	0.64343
216	CC(N1C(C2=CC=C(Cl)C=C2)=O)=C(CC(O)=O)C3=C1C=CC(OC)=C3	C1([Se][Se]C2=CC=CC=C2)=CC=CC=C1	NC(C1=CN(CC2=CC=CC=C2)C=C(C(N)=O)C1C3=CC=CC=C3)=O	CS(C)=O	CC(N1C(C2=CC=C(Cl)C=C2)=O)=C(C[Se]C3=CC=CC=C3)C4=C1C=CC(OC)=C4	0.394748
217	CC1=CC=C(CC(O)=O)C=C1	C1([Se][Se]C2=CC=CC=C2)=CC=CC=C1	NC(C1=CN(CC2=CC=CC=C2)C=C(C(N)=O)C1)=O	CS(C)=O	CC1=CC=C(C[Se]C2=CC=CC=C2)C=C1	0.783246
218	O=C(CCCC1=CNC2=C1C=CC=C2)O	C1([Se][Se]C2=CC=CC=C2)=CC=CC=C1	NC(C1=CN(CC2=CC=CC=C2)C=CC1)=O	CS(C)=O	C1(CCC[Se]C2=CC=CC=C2)=CNC3=C1C=CC=C3	0.7971
219	O=C(CCC1=CC=CC=C1)O	C1([Se][Se]C2=CC=CC=C2)=CC=CC=C1	NC(C1=CN(CC2=CC=C(C(F)(F)F)C=C2)C=CC1)=O	CS(C)=O	C1(CC[Se]C2=CC=CC=C2)=CC=CC=C1	0.8891
220	FC1(F)CCC(C(O)=O)CC1	C1([Se][Se]C2=CC=CC=C2)=CC=CC=C1	NC(C1=CN(CC2=CC=CC=C2)C=C(C(N)=O)C1C3=CC=CC=C3)=O	CS(C)=O	FC1(F)CCC([Se]C2=CC=CC=C2)CC1	0.180564
221	O=C1C2=CC(CC(O)=O)=CC=C2OCC3=CC=CC=C13	C1([Se][Se]C2=CC=CC=C2)=CC=CC=C1	NC(C1=CN(CC2=CC=CC=C2)C=C(C(N)=O)C1C3=CC=CC=C3)=O	CS(C)=O	O=C1C2=CC(C[Se]C3=CC=CC=C3)=CC=C2OCC4=CC=CC=C14	0.624032
222	O=C(C1CCOCC1)O	C1([Se][Se]C2=CC=CC=C2)=CC=CC=C1	NC(C1=CN(CC2=CC=C(OC)C=C2)C=CC1)=O	CS(C)=O	C1([Se]C2=CC=CC=C2)CCOCC1	0.837362
223	O=C(C1CCOCC1)O	C1([Se][Se]C2=CC=CC=C2)=CC=CC=C1	NC(C1=CN(CC2=CC=CC=C2)C=C(C(N)=O)C1C3=CC=CC=C3)=O	CS(C)=O	C1([Se]C2=CC=CC=C2)CCOCC1	0.495
224	O=C(N1CCC(C(O)=O)CC1)OCC2=CC=CC=C2	C1([Se][Se]C2=CC=CC=C2)=CC=CC=C1	NC(C1=CN(CC2=CC=C(C(F)(F)F)C=C2)C=CC1)=O	CS(C)=O	O=C(N1CCC([Se]C2=CC=CC=C2)CC1)OCC3=CC=CC=C3	0.900216
225	CC(C1=CC=C2C=C(OC)C=CC2=C1)C(O)=O	C1([Se][Se]C2=CC=CC=C2)=CC=CC=C1	NC(C1=CN(CC2=CC=CC=C2)C=CC1)=O	CS(C)=O	CC(C1=CC=C2C=C(OC)C=CC2=C1)[Se]C3=CC=CC=C3	0.642473
226	O=C1C2=CC(CC(O)=O)=CC=C2OCC3=CC=CC=C13	C1([Se][Se]C2=CC=CC=C2)=CC=CC=C1	NC(C1=CN(CC2=CC=CC=C2)C=C(C(N)=O)C1)=O	[H]C(N(C)C)=O	O=C1C2=CC(C[Se]C3=CC=CC=C3)=CC=C2OCC4=CC=CC=C14	0.576807
227	CC(N1C(C2=CC=C(Cl)C=C2)=O)=C(CC(O)=O)C3=C1C=CC(OC)=C3	C1([Se][Se]C2=CC=CC=C2)=CC=CC=C1	NC(C1=CN(CC2=CC=CC=C2)C=CC1)=O	[H]C(N(C)C)=O	CC(N1C(C2=CC=C(Cl)C=C2)=O)=C(C[Se]C3=CC=CC=C3)C4=C1C=CC(OC)=C4	0.648972
228	CC(N1C(C2=CC=C(Cl)C=C2)=O)=C(CC(O)=O)C3=C1C=CC(OC)=C3	C1([Se][Se]C2=CC=CC=C2)=CC=CC=C1	NC(C1=CN(CC2=CC=C(OC)C=C2)C=CC1)=O	[H]C(N(C)C)=O	CC(N1C(C2=CC=C(Cl)C=C2)=O)=C(C[Se]C3=CC=CC=C3)C4=C1C=CC(OC)=C4	0.659568
229	CC(N1C(C2=CC=C(Cl)C=C2)=O)=C(CC(O)=O)C3=C1C=CC(OC)=C3	C1([Se][Se]C2=CC=CC=C2)=CC=CC=C1	NC(C1=CN(CC2=CC=C(C(F)(F)F)C=C2)C=CC1)=O	[H]C(N(C)C)=O	CC(N1C(C2=CC=C(Cl)C=C2)=O)=C(C[Se]C3=CC=CC=C3)C4=C1C=CC(OC)=C4	0.703481
230	BrC1=CC=C(CC(O)=O)C=C1	C1([Se][Se]C2=CC=CC=C2)=CC=CC=C1	NC(C1=CN(CC2=CC=C(C(F)(F)F)C=C2)C=CC1)=O	[H]C(N(C)C)=O	BrC1=CC=C(C[Se]C2=CC=CC=C2)C=C1	0.418264
231	COC1=CC=C(CC(O)=O)C=C1	C1([Se][Se]C2=CC=CC=C2)=CC=CC=C1	NC(C1=CN(CC2=CC=CC=C2)C=CC1)=O	[H]C(N(C)C)=O	COC1=CC=C(C[Se]C2=CC=CC=C2)C=C1	0.69915
232	O=C(N1CCC(C(O)=O)CC1)OCC2=CC=CC=C2	C1([Se][Se]C2=CC=CC=C2)=CC=CC=C1	NC(C1=CN(CC2=CC=CC=C2)C=C(C(N)=O)C1)=O	[H]C(N(C)C)=O	O=C(N1CCC([Se]C2=CC=CC=C2)CC1)OCC3=CC=CC=C3	0.795325
233	O=C(C1CCC1)O	C1([Se][Se]C2=CC=CC=C2)=CC=CC=C1	NC(C1=CN(CC2=CC=CC=C2)C=C(C(N)=O)C1)=O	[H]C(N(C)C)=O	C1([Se]C2=CC=CC=C2)CCC1	0.595057
234	O=C(C1(C2=CC=CC=C2)CC1)O	C1([Se][Se]C2=CC=CC=C2)=CC=CC=C1	NC(C1=CN(CC2=CC=CC=C2)C=C(C(N)=O)C1C3=CC=CC=C3)=O	[H]C(N(C)C)=O	C1(C2([Se]C3=CC=CC=C3)CC2)=CC=CC=C1	0
235	O=C(CCCC1=CNC2=C1C=CC=C2)O	C1([Se][Se]C2=CC=CC=C2)=CC=CC=C1	NC(C1=CN(CC2=CC=CC=C2)C=C(C(N)=O)C1C3=CC=CC=C3)=O	CC#N	C1(CCC[Se]C2=CC=CC=C2)=CNC3=C1C=CC=C3	0.293044
236	O=C(CCC1=CC=CC=C1)O	C1([Se][Se]C2=CC=CC=C2)=CC=CC=C1	NC(C1=CN(CC2=CC=C(C(F)(F)F)C=C2)C=CC1)=O	CC#N	C1(CC[Se]C2=CC=CC=C2)=CC=CC=C1	0.1929
237	FC1(F)CCC(C(O)=O)CC1	C1([Se][Se]C2=CC=CC=C2)=CC=CC=C1	NC(C1=CN(CC2=CC=CC=C2)C=C(C(N)=O)C1C3=CC=CC=C3)=O	CC#N	FC1(F)CCC([Se]C2=CC=CC=C2)CC1	0.0410295
238	BrC1=CC=C(CC(O)=O)C=C1	C1([Se][Se]C2=CC=CC=C2)=CC=CC=C1	NC(C1=CN(CC2=CC=CC=C2)C=CC1)=O	CC#N	BrC1=CC=C(C[Se]C2=CC=CC=C2)C=C1	0.290879
239	COC1=CC=C(CC(O)=O)C=C1	C1([Se][Se]C2=CC=CC=C2)=CC=CC=C1	NC(C1=CN(CC2=CC=C(C(F)(F)F)C=C2)C=CC1)=O	CC#N	COC1=CC=C(C[Se]C2=CC=CC=C2)C=C1	0.223141
240	COC1=CC=C(CC(O)=O)C=C1	C1([Se][Se]C2=CC=CC=C2)=CC=CC=C1	NC(C1=CN(CC2=CC=CC=C2)C=C(C(N)=O)C1)=O	CC#N	COC1=CC=C(C[Se]C2=CC=CC=C2)C=C1	0.0272035
241	CC1=C(CC(O)=O)C=CC=C1	C1([Se][Se]C2=CC=CC=C2)=CC=CC=C1	NC(C1=CN(CC2=CC=C(OC)C=C2)C=CC1)=O	CC#N	CC1=C(C[Se]C2=CC=CC=C2)C=CC=C1	0.286533
242	O=C(C1CCOCC1)O	C1([Se][Se]C2=CC=CC=C2)=CC=CC=C1	NC(C1=CN(CC2=CC=CC=C2)C=C(C(N)=O)C1)=O	CC#N	C1([Se]C2=CC=CC=C2)CCOCC1	0
243	O=C(C1CCOCC1)O	C1([Se][Se]C2=CC=CC=C2)=CC=CC=C1	NC(C1=CN(CC2=CC=CC=C2)C=C(C(N)=O)C1C3=CC=CC=C3)=O	CC#N	C1([Se]C2=CC=CC=C2)CCOCC1	0
244	O=C(OCC1=CC=CC=C1)[C@H](NC(OC(C)(C)C)=O)CC(O)=O	C1([Se][Se]C2=CC=CC=C2)=CC=CC=C1	NC(C1=CN(CC2=CC=C(C(F)(F)F)C=C2)C=CC1)=O	CC#N	O=C(OCC1=CC=CC=C1)[C@H](NC(OC(C)(C)C)=O)C[Se]C2=CC=CC=C2	0.813079
245	O=C(C1CCC1)O	C1([Se][Se]C2=CC=CC=C2)=CC=CC=C1	NC(C1=CN(CC2=CC=CC=C2)C=C(C(N)=O)C1)=O	CC#N	C1([Se]C2=CC=CC=C2)CCC1	0.175902
246	CC(C1=CC=C2C=C(OC)C=CC2=C1)C(O)=O	C1([Se][Se]C2=CC=CC=C2)=CC=CC=C1	NC(C1=CN(CC2=CC=C(OC)C=C2)C=CC1)=O	CC#N	CC(C1=CC=C2C=C(OC)C=CC2=C1)[Se]C3=CC=CC=C3	0.29431
247	CC(C1=CC=C2C=C(OC)C=CC2=C1)C(O)=O	C1([Se][Se]C2=CC=CC=C2)=CC=CC=C1	NC(C1=CN(CC2=CC=CC=C2)C=C(C(N)=O)C1C3=CC=CC=C3)=O	CC#N	CC(C1=CC=C2C=C(OC)C=CC2=C1)[Se]C3=CC=CC=C3	0
248	O=C(CCCC1=CNC2=C1C=CC=C2)O	C1(C[Se][Se]CC2=CC=CC=C2)=CC=CC=C1	NC(C1=CN(CC2=CC=CC=C2)C=C(C(N)=O)C1)=O	CS(C)=O	C1(CCC[Se]CC2=CC=CC=C2)=CNC3=C1C=CC=C3	0.0271484
249	CC1=CC=C(S(N2CCC(C(O)=O)CC2)(=O)=O)C=C1	C1(C[Se][Se]CC2=CC=CC=C2)=CC=CC=C1	NC(C1=CN(CC2=CC=CC=C2)C=C(C(N)=O)C1C3=CC=CC=C3)=O	CS(C)=O	CC1=CC=C(S(N2CCC([Se]CC3=CC=CC=C3)CC2)(=O)=O)C=C1	0.0358984
250	O=C1C2=CC(CC(O)=O)=CC=C2OCC3=CC=CC=C13	C1(C[Se][Se]CC2=CC=CC=C2)=CC=CC=C1	NC(C1=CN(CC2=CC=C(OC)C=C2)C=CC1)=O	CS(C)=O	O=C1C2=CC(C[Se]CC3=CC=CC=C3)=CC=C2OCC4=CC=CC=C14	0.283787
251	CC(C1=CC=C(CC2C(CCC2)=O)C=C1)C(O)=O	C1(C[Se][Se]CC2=CC=CC=C2)=CC=CC=C1	NC(C1=CN(CC2=CC=CC=C2)C=CC1)=O	CS(C)=O	CC(C1=CC=C(CC2C(CCC2)=O)C=C1)[Se]CC3=CC=CC=C3	0.11
252	CC(N1C(C2=CC=C(Cl)C=C2)=O)=C(CC(O)=O)C3=C1C=CC(OC)=C3	C1(C[Se][Se]CC2=CC=CC=C2)=CC=CC=C1	NC(C1=CN(CC2=CC=CC=C2)C=C(C(N)=O)C1)=O	CS(C)=O	CC(N1C(C2=CC=C(Cl)C=C2)=O)=C(C[Se]CC3=CC=CC=C3)C4=C1C=CC(OC)=C4	0
253	CC(N(C(C1=C2C=CC=C1)=O)C2=O)C(O)=O	C1(C[Se][Se]CC2=CC=CC=C2)=CC=CC=C1	NC(C1=CN(CC2=CC=CC=C2)C=C(C(N)=O)C1C3=CC=CC=C3)=O	[H]C(N(C)C)=O	CC(N(C(C1=C2C=CC=C1)=O)C2=O)[Se]CC3=CC=CC=C3	0.134277
254	O=C(CCCC1=CNC2=C1C=CC=C2)O	C1(C[Se][Se]CC2=CC=CC=C2)=CC=CC=C1	NC(C1=CN(CC2=CC=CC=C2)C=CC1)=O	[H]C(N(C)C)=O	C1(CCC[Se]CC2=CC=CC=C2)=CNC3=C1C=CC=C3	0.0594334
255	O=C(CCCC1=CNC2=C1C=CC=C2)O	C1(C[Se][Se]CC2=CC=CC=C2)=CC=CC=C1	NC(C1=CN(CC2=CC=CC=C2)C=C(C(N)=O)C1)=O	[H]C(N(C)C)=O	C1(CCC[Se]CC2=CC=CC=C2)=CNC3=C1C=CC=C3	0.0265027
256	CC1=CC=C(S(N2CCC(C(O)=O)CC2)(=O)=O)C=C1	C1(C[Se][Se]CC2=CC=CC=C2)=CC=CC=C1	NC(C1=CN(CC2=CC=CC=C2)C=C(C(N)=O)C1C3=CC=CC=C3)=O	[H]C(N(C)C)=O	CC1=CC=C(S(N2CCC([Se]CC3=CC=CC=C3)CC2)(=O)=O)C=C1	0.0364648
257	CC(N1C(C2=CC=C(Cl)C=C2)=O)=C(CC(O)=O)C3=C1C=CC(OC)=C3	C1(C[Se][Se]CC2=CC=CC=C2)=CC=CC=C1	NC(C1=CN(CC2=CC=CC=C2)C=C(C(N)=O)C1C3=CC=CC=C3)=O	[H]C(N(C)C)=O	CC(N1C(C2=CC=C(Cl)C=C2)=O)=C(C[Se]CC3=CC=CC=C3)C4=C1C=CC(OC)=C4	0.0386538
258	CC(N(C(C1=C2C=CC=C1)=O)C2=O)C(O)=O	C1(C[Se][Se]CC2=CC=CC=C2)=CC=CC=C1	NC(C1=CN(CC2=CC=CC=C2)C=C(C(N)=O)C1)=O	CC#N	CC(N(C(C1=C2C=CC=C1)=O)C2=O)[Se]CC3=CC=CC=C3	0.18986
259	O=C(CCCC1=CNC2=C1C=CC=C2)O	C1(C[Se][Se]CC2=CC=CC=C2)=CC=CC=C1	NC(C1=CN(CC2=CC=CC=C2)C=CC1)=O	CC#N	C1(CCC[Se]CC2=CC=CC=C2)=CNC3=C1C=CC=C3	0.0272609
260	O=C(CCCC1=CNC2=C1C=CC=C2)O	C1(C[Se][Se]CC2=CC=CC=C2)=CC=CC=C1	NC(C1=CN(CC2=CC=CC=C2)C=C(C(N)=O)C1)=O	CC#N	C1(CCC[Se]CC2=CC=CC=C2)=CNC3=C1C=CC=C3	0.118482
261	O=C(CCCC1=CNC2=C1C=CC=C2)O	C1(C[Se][Se]CC2=CC=CC=C2)=CC=CC=C1	NC(C1=CN(CC2=CC=CC=C2)C=C(C(N)=O)C1C3=CC=CC=C3)=O	CC#N	C1(CCC[Se]CC2=CC=CC=C2)=CNC3=C1C=CC=C3	0.169753
262	CC1=CC=C(S(N2CCC(C(O)=O)CC2)(=O)=O)C=C1	C1(C[Se][Se]CC2=CC=CC=C2)=CC=CC=C1	NC(C1=CN(CC2=CC=CC=C2)C=CC1)=O	CC#N	CC1=CC=C(S(N2CCC([Se]CC3=CC=CC=C3)CC2)(=O)=O)C=C1	0
263	O=C1C2=CC(CC(O)=O)=CC=C2OCC3=CC=CC=C13	C1(C[Se][Se]CC2=CC=CC=C2)=CC=CC=C1	NC(C1=CN(CC2=CC=CC=C2)C=CC1)=O	CC#N	O=C1C2=CC(C[Se]CC3=CC=CC=C3)=CC=C2OCC4=CC=CC=C14	0.348637
264	O=C1C2=CC(CC(O)=O)=CC=C2OCC3=CC=CC=C13	C1(C[Se][Se]CC2=CC=CC=C2)=CC=CC=C1	NC(C1=CN(CC2=CC=CC=C2)C=C(C(N)=O)C1C3=CC=CC=C3)=O	CC#N	O=C1C2=CC(C[Se]CC3=CC=CC=C3)=CC=C2OCC4=CC=CC=C14	0.322833
265	CC(C1=CC=C(CC2C(CCC2)=O)C=C1)C(O)=O	C1(C[Se][Se]CC2=CC=CC=C2)=CC=CC=C1	NC(C1=CN(CC2=CC=CC=C2)C=CC1)=O	CC#N	CC(C1=CC=C(CC2C(CCC2)=O)C=C1)[Se]CC3=CC=CC=C3	0
266	O=C(C1CCCCC1)O	C1(C[Se][Se]CC2=CC=CC=C2)=CC=CC=C1	NC(C1=CN(CC2=CC=CC=C2)C=CC1)=O	CS(C)=O	C1([Se]CC2=CC=CC=C2)CCCCC1	0.0473248
267	O=C(C1CCCCC1)O	C1(C[Se][Se]CC2=CC=CC=C2)=CC=CC=C1	NC(C1=CN(CC2=CC=C(OC)C=C2)C=CC1)=O	CS(C)=O	C1([Se]CC2=CC=CC=C2)CCCCC1	0.0661424
268	O=C(N1CCC(C(O)=O)CC1)OCC2=CC=CC=C2	C1(C[Se][Se]CC2=CC=CC=C2)=CC=CC=C1	NC(C1=CN(CC2=CC=CC=C2)C=CC1)=O	CS(C)=O	O=C(N1CCC([Se]CC2=CC=CC=C2)CC1)OCC3=CC=CC=C3	0.048279
269	O=C(N1CCC(C(O)=O)CC1)OCC2=CC=CC=C2	C1(C[Se][Se]CC2=CC=CC=C2)=CC=CC=C1	NC(C1=CN(CC2=CC=C(OC)C=C2)C=CC1)=O	CS(C)=O	O=C(N1CCC([Se]CC2=CC=CC=C2)CC1)OCC3=CC=CC=C3	0.0786252
270	O=C(OCC1=CC=CC=C1)[C@H](NC(OC(C)(C)C)=O)CC(O)=O	C1(C[Se][Se]CC2=CC=CC=C2)=CC=CC=C1	NC(C1=CN(CC2=CC=CC=C2)C=C(C(N)=O)C1)=O	CS(C)=O	O=C(OCC1=CC=CC=C1)[C@H](NC(OC(C)(C)C)=O)C[Se]CC2=CC=CC=C2	0.0158485
271	O=C(C1CCCCC1)O	C1(C[Se][Se]CC2=CC=CC=C2)=CC=CC=C1	NC(C1=CN(CC2=CC=CC=C2)C=CC1)=O	[H]C(N(C)C)=O	C1([Se]CC2=CC=CC=C2)CCCCC1	0.018108
272	O=C(C1CCCCC1)O	C1(C[Se][Se]CC2=CC=CC=C2)=CC=CC=C1	NC(C1=CN(CC2=CC=C(C(F)(F)F)C=C2)C=CC1)=O	[H]C(N(C)C)=O	C1([Se]CC2=CC=CC=C2)CCCCC1	0.008204
273	O=C(C1CCCCC1)O	C1(C[Se][Se]CC2=CC=CC=C2)=CC=CC=C1	NC(C1=CN(CC2=CC=CC=C2)C=C(C(N)=O)C1)=O	[H]C(N(C)C)=O	C1([Se]CC2=CC=CC=C2)CCCCC1	0
274	O=C(OCC1=CC=CC=C1)[C@H](NC(OC(C)(C)C)=O)CC(O)=O	C1(C[Se][Se]CC2=CC=CC=C2)=CC=CC=C1	NC(C1=CN(CC2=CC=C(C(F)(F)F)C=C2)C=CC1)=O	[H]C(N(C)C)=O	O=C(OCC1=CC=CC=C1)[C@H](NC(OC(C)(C)C)=O)C[Se]CC2=CC=CC=C2	0.0274862
275	O=C(OCC1=CC=CC=C1)[C@H](NC(OC(C)(C)C)=O)CC(O)=O	C1(C[Se][Se]CC2=CC=CC=C2)=CC=CC=C1	NC(C1=CN(CC2=CC=CC=C2)C=C(C(N)=O)C1)=O	[H]C(N(C)C)=O	O=C(OCC1=CC=CC=C1)[C@H](NC(OC(C)(C)C)=O)C[Se]CC2=CC=CC=C2	0.00546445
276	O=C(C1CCC1)O	C1(C[Se][Se]CC2=CC=CC=C2)=CC=CC=C1	NC(C1=CN(CC2=CC=C(C(F)(F)F)C=C2)C=CC1)=O	[H]C(N(C)C)=O	C1([Se]CC2=CC=CC=C2)CCC1	0
277	O=C(C1CCC1)O	C1(C[Se][Se]CC2=CC=CC=C2)=CC=CC=C1	NC(C1=CN(CC2=CC=CC=C2)C=C(C(N)=O)C1)=O	[H]C(N(C)C)=O	C1([Se]CC2=CC=CC=C2)CCC1	0
278	CC(C1=CC=C2C=C(OC)C=CC2=C1)C(O)=O	C1(C[Se][Se]CC2=CC=CC=C2)=CC=CC=C1	NC(C1=CN(CC2=CC=CC=C2)C=CC1)=O	[H]C(N(C)C)=O	CC(C1=CC=C2C=C(OC)C=CC2=C1)[Se]CC3=CC=CC=C3	0.05572
279	CC(C1=CC=C2C=C(OC)C=CC2=C1)C(O)=O	C1(C[Se][Se]CC2=CC=CC=C2)=CC=CC=C1	NC(C1=CN(CC2=CC=C(OC)C=C2)C=CC1)=O	[H]C(N(C)C)=O	CC(C1=CC=C2C=C(OC)C=CC2=C1)[Se]CC3=CC=CC=C3	0.0800975
280	CC(C1=CC=C2C=C(OC)C=CC2=C1)C(O)=O	C1(C[Se][Se]CC2=CC=CC=C2)=CC=CC=C1	NC(C1=CN(CC2=CC=CC=C2)C=C(C(N)=O)C1C3=CC=CC=C3)=O	[H]C(N(C)C)=O	CC(C1=CC=C2C=C(OC)C=CC2=C1)[Se]CC3=CC=CC=C3	0
281	O=C(C1CCCCC1)O	C1(C[Se][Se]CC2=CC=CC=C2)=CC=CC=C1	NC(C1=CN(CC2=CC=C(OC)C=C2)C=CC1)=O	CC#N	C1([Se]CC2=CC=CC=C2)CCCCC1	0
282	O=C(C1CCCCC1)O	C1(C[Se][Se]CC2=CC=CC=C2)=CC=CC=C1	NC(C1=CN(CC2=CC=C(C(F)(F)F)C=C2)C=CC1)=O	CC#N	C1([Se]CC2=CC=CC=C2)CCCCC1	0
283	O=C(C1CCCCC1)O	C1(C[Se][Se]CC2=CC=CC=C2)=CC=CC=C1	NC(C1=CN(CC2=CC=CC=C2)C=C(C(N)=O)C1)=O	CC#N	C1([Se]CC2=CC=CC=C2)CCCCC1	0
284	O=C(C1CCC1)O	C1(C[Se][Se]CC2=CC=CC=C2)=CC=CC=C1	NC(C1=CN(CC2=CC=CC=C2)C=C(C(N)=O)C1C3=CC=CC=C3)=O	CC#N	C1([Se]CC2=CC=CC=C2)CCC1	0.0124185
285	CC(C1=CC=C2C=C(OC)C=CC2=C1)C(O)=O	C1(C[Se][Se]CC2=CC=CC=C2)=CC=CC=C1	NC(C1=CN(CC2=CC=CC=C2)C=C(C(N)=O)C1C3=CC=CC=C3)=O	CC#N	CC(C1=CC=C2C=C(OC)C=CC2=C1)[Se]CC3=CC=CC=C3	0
286	CC(N(C(C1=C2C=CC=C1)=O)C2=O)C(O)=O	CC[Se][Se]CC	NC(C1=CN(CC2=CC=CC=C2)C=C(C(N)=O)C1)=O	CS(C)=O	CC(N(C(C1=C2C=CC=C1)=O)C2=O)[Se]CC	0
287	CC(N(C(C1=C2C=CC=C1)=O)C2=O)C(O)=O	CC[Se][Se]CC	NC(C1=CN(CC2=CC=CC=C2)C=C(C(N)=O)C1C3=CC=CC=C3)=O	CS(C)=O	CC(N(C(C1=C2C=CC=C1)=O)C2=O)[Se]CC	0
288	CC(C1=CC=C(CC2C(CCC2)=O)C=C1)C(O)=O	CC[Se][Se]CC	NC(C1=CN(CC2=CC=CC=C2)C=C(C(N)=O)C1)=O	CS(C)=O	CC(C1=CC=C(CC2C(CCC2)=O)C=C1)[Se]CC	0.183805
289	CC(N1C(C2=CC=C(Cl)C=C2)=O)=C(CC(O)=O)C3=C1C=CC(OC)=C3	CC[Se][Se]CC	NC(C1=CN(CC2=CC=CC=C2)C=CC1)=O	CS(C)=O	CC(N1C(C2=CC=C(Cl)C=C2)=O)=C(C[Se]CC)C3=C1C=CC(OC)=C3	0.1828
290	CC(N(C(C1=C2C=CC=C1)=O)C2=O)C(O)=O	CC[Se][Se]CC	NC(C1=CN(CC2=CC=C(C(F)(F)F)C=C2)C=CC1)=O	[H]C(N(C)C)=O	CC(N(C(C1=C2C=CC=C1)=O)C2=O)[Se]CC	0
291	O=C(CCCC1=CNC2=C1C=CC=C2)O	CC[Se][Se]CC	NC(C1=CN(CC2=CC=CC=C2)C=CC1)=O	[H]C(N(C)C)=O	CC[Se]CCCC1=CNC2=C1C=CC=C2	0.100504
292	O=C(CCCC1=CNC2=C1C=CC=C2)O	CC[Se][Se]CC	NC(C1=CN(CC2=CC=C(C(F)(F)F)C=C2)C=CC1)=O	[H]C(N(C)C)=O	CC[Se]CCCC1=CNC2=C1C=CC=C2	0.151109
293	O=C(CCCC1=CNC2=C1C=CC=C2)O	CC[Se][Se]CC	NC(C1=CN(CC2=CC=CC=C2)C=C(C(N)=O)C1C3=CC=CC=C3)=O	[H]C(N(C)C)=O	CC[Se]CCCC1=CNC2=C1C=CC=C2	0.108495
294	CC1=CC=C(S(N2CCC(C(O)=O)CC2)(=O)=O)C=C1	CC[Se][Se]CC	NC(C1=CN(CC2=CC=C(C(F)(F)F)C=C2)C=CC1)=O	[H]C(N(C)C)=O	CC1=CC=C(S(N2CCC([Se]CC)CC2)(=O)=O)C=C1	0
295	O=C1C2=CC(CC(O)=O)=CC=C2OCC3=CC=CC=C13	CC[Se][Se]CC	NC(C1=CN(CC2=CC=C(C(F)(F)F)C=C2)C=CC1)=O	[H]C(N(C)C)=O	O=C1C2=CC(C[Se]CC)=CC=C2OCC3=CC=CC=C13	0
296	O=C1C2=CC(CC(O)=O)=CC=C2OCC3=CC=CC=C13	CC[Se][Se]CC	NC(C1=CN(CC2=CC=CC=C2)C=C(C(N)=O)C1C3=CC=CC=C3)=O	[H]C(N(C)C)=O	O=C1C2=CC(C[Se]CC)=CC=C2OCC3=CC=CC=C13	0
297	CC(N1C(C2=CC=C(Cl)C=C2)=O)=C(CC(O)=O)C3=C1C=CC(OC)=C3	CC[Se][Se]CC	NC(C1=CN(CC2=CC=CC=C2)C=CC1)=O	[H]C(N(C)C)=O	CC(N1C(C2=CC=C(Cl)C=C2)=O)=C(C[Se]CC)C3=C1C=CC(OC)=C3	0.0235957
298	CC(N(C(C1=C2C=CC=C1)=O)C2=O)C(O)=O	CC[Se][Se]CC	NC(C1=CN(CC2=CC=CC=C2)C=C(C(N)=O)C1)=O	CC#N	CC(N(C(C1=C2C=CC=C1)=O)C2=O)[Se]CC	0
299	O=C(CCCC1=CNC2=C1C=CC=C2)O	CC[Se][Se]CC	NC(C1=CN(CC2=CC=CC=C2)C=CC1)=O	CC#N	CC[Se]CCCC1=CNC2=C1C=CC=C2	0.0272609
300	O=C(CCCC1=CNC2=C1C=CC=C2)O	CC[Se][Se]CC	NC(C1=CN(CC2=CC=C(C(F)(F)F)C=C2)C=CC1)=O	CC#N	CC[Se]CCCC1=CNC2=C1C=CC=C2	0.0265951
301	CC1=CC=C(S(N2CCC(C(O)=O)CC2)(=O)=O)C=C1	CC[Se][Se]CC	NC(C1=CN(CC2=CC=CC=C2)C=CC1)=O	CC#N	CC1=CC=C(S(N2CCC([Se]CC)CC2)(=O)=O)C=C1	0
302	CC1=CC=C(S(N2CCC(C(O)=O)CC2)(=O)=O)C=C1	CC[Se][Se]CC	NC(C1=CN(CC2=CC=C(C(F)(F)F)C=C2)C=CC1)=O	CC#N	CC1=CC=C(S(N2CCC([Se]CC)CC2)(=O)=O)C=C1	0
303	CC(N1C(C2=CC=C(Cl)C=C2)=O)=C(CC(O)=O)C3=C1C=CC(OC)=C3	CC[Se][Se]CC	NC(C1=CN(CC2=CC=C(OC)C=C2)C=CC1)=O	CC#N	CC(N1C(C2=CC=C(Cl)C=C2)=O)=C(C[Se]CC)C3=C1C=CC(OC)=C3	0
304	CC(N1C(C2=CC=C(Cl)C=C2)=O)=C(CC(O)=O)C3=C1C=CC(OC)=C3	CC[Se][Se]CC	NC(C1=CN(CC2=CC=CC=C2)C=C(C(N)=O)C1)=O	CC#N	CC(N1C(C2=CC=C(Cl)C=C2)=O)=C(C[Se]CC)C3=C1C=CC(OC)=C3	0
305	BrC1=CC=C(CC(O)=O)C=C1	CC[Se][Se]CC	NC(C1=CN(CC2=CC=C(C(F)(F)F)C=C2)C=CC1)=O	CS(C)=O	BrC1=CC=C(C[Se]CC)C=C1	0.00769
306	COC1=CC=C(CC(O)=O)C=C1	CC[Se][Se]CC	NC(C1=CN(CC2=CC=CC=C2)C=C(C(N)=O)C1)=O	CS(C)=O	COC1=CC=C(C[Se]CC)C=C1	0.183459
307	CC1=C(CC(O)=O)C=CC=C1	CC[Se][Se]CC	NC(C1=CN(CC2=CC=CC=C2)C=CC1)=O	CS(C)=O	CC1=C(C[Se]CC)C=CC=C1	0.492272
308	CC1=C(CC(O)=O)C=CC=C1	CC[Se][Se]CC	NC(C1=CN(CC2=CC=CC=C2)C=C(C(N)=O)C1C3=CC=CC=C3)=O	CS(C)=O	CC1=C(C[Se]CC)C=CC=C1	0
309	O=C(CC1=CNC2=C1C=CC=C2)O	CC[Se][Se]CC	NC(C1=CN(CC2=CC=C(OC)C=C2)C=CC1)=O	CS(C)=O	CC[Se]CC1=CNC2=C1C=CC=C2	0.568589
310	CC1=CC=C(CC(O)=O)C=C1	CC[Se][Se]CC	NC(C1=CN(CC2=CC=C(OC)C=C2)C=CC1)=O	[H]C(N(C)C)=O	CC1=CC=C(C[Se]CC)C=C1	0.101176
311	BrC1=CC=C(CC(O)=O)C=C1	CC[Se][Se]CC	NC(C1=CN(CC2=CC=CC=C2)C=C(C(N)=O)C1)=O	[H]C(N(C)C)=O	BrC1=CC=C(C[Se]CC)C=C1	0
312	CC1=C(CC(O)=O)C=CC=C1	CC[Se][Se]CC	NC(C1=CN(CC2=CC=C(C(F)(F)F)C=C2)C=CC1)=O	[H]C(N(C)C)=O	CC1=C(C[Se]CC)C=CC=C1	0.00813
313	O=C(CC1=CNC2=C1C=CC=C2)O	CC[Se][Se]CC	NC(C1=CN(CC2=CC=C(OC)C=C2)C=CC1)=O	[H]C(N(C)C)=O	CC[Se]CC1=CNC2=C1C=CC=C2	0.03255
314	CC1=CC=C(CC(O)=O)C=C1	CC[Se][Se]CC	NC(C1=CN(CC2=CC=C(C(F)(F)F)C=C2)C=CC1)=O	CC#N	CC1=CC=C(C[Se]CC)C=C1	0
315	BrC1=CC=C(CC(O)=O)C=C1	CC[Se][Se]CC	NC(C1=CN(CC2=CC=CC=C2)C=C(C(N)=O)C1C3=CC=CC=C3)=O	CC#N	BrC1=CC=C(C[Se]CC)C=C1	0
316	COC1=CC=C(CC(O)=O)C=C1	CC[Se][Se]CC	NC(C1=CN(CC2=CC=CC=C2)C=CC1)=O	CC#N	COC1=CC=C(C[Se]CC)C=C1	0.0987224
317	COC1=CC=C(CC(O)=O)C=C1	CC[Se][Se]CC	NC(C1=CN(CC2=CC=C(C(F)(F)F)C=C2)C=CC1)=O	CC#N	COC1=CC=C(C[Se]CC)C=C1	0.0652688
318	COC1=CC=C(CC(O)=O)C=C1	CC[Se][Se]CC	NC(C1=CN(CC2=CC=CC=C2)C=C(C(N)=O)C1C3=CC=CC=C3)=O	CC#N	COC1=CC=C(C[Se]CC)C=C1	0.0475952
319	O=C(CC1=CNC2=C1C=CC=C2)O	CC[Se][Se]CC	NC(C1=CN(CC2=CC=C(OC)C=C2)C=CC1)=O	CC#N	CC[Se]CC1=CNC2=C1C=CC=C2	0.1225
320	CC(C1=CC=C(CC2C(CCC2)=O)C=C1)C(O)=O	C1([Se][Se]C2=CC=CC=C2)=CC=CC=C1	NC(C1=CN(CC2=CC=C(C(F)(F)F)C=C2)C=CC1)=O	CS(C)=O	CC(C1=CC=C(CC2C(CCC2)=O)C=C1)[Se]C3=CC=CC=C3	0.638295
321	BrC1=CC=C(CC(O)=O)C=C1	C1([Se][Se]C2=CC=CC=C2)=CC=CC=C1	NC(C1=CN(CC2=CC=CC=C2)C=CC1)=O	CS(C)=O	BrC1=CC=C(C[Se]C2=CC=CC=C2)C=C1	0.269228
322	COC1=CC=C(CC(O)=O)C=C1	C1([Se][Se]C2=CC=CC=C2)=CC=CC=C1	NC(C1=CN(CC2=CC=C(C(F)(F)F)C=C2)C=CC1)=O	CS(C)=O	COC1=CC=C(C[Se]C2=CC=CC=C2)C=C1	0.160976
323	COC1=CC=C(CC(O)=O)C=C1	C1([Se][Se]C2=CC=CC=C2)=CC=CC=C1	NC(C1=CN(CC2=CC=CC=C2)C=C(C(N)=O)C1)=O	CS(C)=O	COC1=CC=C(C[Se]C2=CC=CC=C2)C=C1	0.160976
324	O=C(CCC1=CC=CC=C1)O	C1([Se][Se]C2=CC=CC=C2)=CC=CC=C1	NC(C1=CN(CC2=CC=CC=C2)C=C(C(N)=O)C1)=O	CS(C)=O	C1(CC[Se]C2=CC=CC=C2)=CC=CC=C1	0.909493
325	FC1(F)CCC(C(O)=O)CC1	C1([Se][Se]C2=CC=CC=C2)=CC=CC=C1	NC(C1=CN(CC2=CC=CC=C2)C=C(C(N)=O)C1)=O	CS(C)=O	FC1(F)CCC([Se]C2=CC=CC=C2)CC1	0.25797
326	O=C1C2=CC(CC(O)=O)=CC=C2OCC3=CC=CC=C13	C1([Se][Se]C2=CC=CC=C2)=CC=CC=C1	NC(C1=CN(CC2=CC=C(C(F)(F)F)C=C2)C=CC1)=O	CS(C)=O	O=C1C2=CC(C[Se]C3=CC=CC=C3)=CC=C2OCC4=CC=CC=C14	0.715913
327	O=C1C2=CC(CC(O)=O)=CC=C2OCC3=CC=CC=C13	C1([Se][Se]C2=CC=CC=C2)=CC=CC=C1	NC(C1=CN(CC2=CC=CC=C2)C=C(C(N)=O)C1)=O	CS(C)=O	O=C1C2=CC(C[Se]C3=CC=CC=C3)=CC=C2OCC4=CC=CC=C14	0.765636
328	O=C(C1CCC1)O	C1([Se][Se]C2=CC=CC=C2)=CC=CC=C1	NC(C1=CN(CC2=CC=C(OC)C=C2)C=CC1)=O	CS(C)=O	C1([Se]C2=CC=CC=C2)CCC1	0.640482
329	O=C(C1CCC1)O	C1([Se][Se]C2=CC=CC=C2)=CC=CC=C1	NC(C1=CN(CC2=CC=CC=C2)C=C(C(N)=O)C1)=O	CS(C)=O	C1([Se]C2=CC=CC=C2)CCC1	0.595057
330	CC1=CC=C(S(N2CCC(C(O)=O)CC2)(=O)=O)C=C1	C1([Se][Se]C2=CC=CC=C2)=CC=CC=C1	NC(C1=CN(CC2=CC=CC=C2)C=C(C(N)=O)C1)=O	[H]C(N(C)C)=O	CC1=CC=C(S(N2CCC([Se]C3=CC=CC=C3)CC2)(=O)=O)C=C1	0.378481
331	O=C(CCC1=CC=CC=C1)O	C1([Se][Se]C2=CC=CC=C2)=CC=CC=C1	NC(C1=CN(CC2=CC=C(OC)C=C2)C=CC1)=O	[H]C(N(C)C)=O	C1(CC[Se]C2=CC=CC=C2)=CC=CC=C1	0.101193
332	O=C(CCC1=CC=CC=C1)O	C1([Se][Se]C2=CC=CC=C2)=CC=CC=C1	NC(C1=CN(CC2=CC=CC=C2)C=C(C(N)=O)C1)=O	[H]C(N(C)C)=O	C1(CC[Se]C2=CC=CC=C2)=CC=CC=C1	0.0236157
333	FC1(F)CCC(C(O)=O)CC1	C1([Se][Se]C2=CC=CC=C2)=CC=CC=C1	NC(C1=CN(CC2=CC=CC=C2)C=C(C(N)=O)C1)=O	[H]C(N(C)C)=O	FC1(F)CCC([Se]C2=CC=CC=C2)CC1	0.245239
334	CC(C1=CC=C(CC2C(CCC2)=O)C=C1)C(O)=O	C1([Se][Se]C2=CC=CC=C2)=CC=CC=C1	NC(C1=CN(CC2=CC=CC=C2)C=CC1)=O	[H]C(N(C)C)=O	CC(C1=CC=C(CC2C(CCC2)=O)C=C1)[Se]C3=CC=CC=C3	0.556539
335	CC(C1=CC=C(CC2C(CCC2)=O)C=C1)C(O)=O	C1([Se][Se]C2=CC=CC=C2)=CC=CC=C1	NC(C1=CN(CC2=CC=C(OC)C=C2)C=CC1)=O	[H]C(N(C)C)=O	CC(C1=CC=C(CC2C(CCC2)=O)C=C1)[Se]C3=CC=CC=C3	0.523041
336	CC1=CC=C(CC(O)=O)C=C1	C1([Se][Se]C2=CC=CC=C2)=CC=CC=C1	NC(C1=CN(CC2=CC=C(OC)C=C2)C=CC1)=O	[H]C(N(C)C)=O	CC1=CC=C(C[Se]C2=CC=CC=C2)C=C1	0.500231
337	BrC1=CC=C(CC(O)=O)C=C1	C1([Se][Se]C2=CC=CC=C2)=CC=CC=C1	NC(C1=CN(CC2=CC=C(OC)C=C2)C=CC1)=O	[H]C(N(C)C)=O	BrC1=CC=C(C[Se]C2=CC=CC=C2)C=C1	0.389062
338	CC1=C(CC(O)=O)C=CC=C1	C1([Se][Se]C2=CC=CC=C2)=CC=CC=C1	NC(C1=CN(CC2=CC=CC=C2)C=CC1)=O	[H]C(N(C)C)=O	CC1=C(C[Se]C2=CC=CC=C2)C=CC=C1	0.630666
339	CC1=C(CC(O)=O)C=CC=C1	C1([Se][Se]C2=CC=CC=C2)=CC=CC=C1	NC(C1=CN(CC2=CC=C(C(F)(F)F)C=C2)C=CC1)=O	[H]C(N(C)C)=O	CC1=C(C[Se]C2=CC=CC=C2)C=CC=C1	0.630666
340	CC1=C(CC(O)=O)C=CC=C1	C1([Se][Se]C2=CC=CC=C2)=CC=CC=C1	NC(C1=CN(CC2=CC=CC=C2)C=C(C(N)=O)C1)=O	[H]C(N(C)C)=O	CC1=C(C[Se]C2=CC=CC=C2)C=CC=C1	0.405827
341	O=C(C1CCOCC1)O	C1([Se][Se]C2=CC=CC=C2)=CC=CC=C1	NC(C1=CN(CC2=CC=CC=C2)C=C(C(N)=O)C1)=O	[H]C(N(C)C)=O	C1([Se]C2=CC=CC=C2)CCOCC1	0.351923
342	O=C(N1CCC(C(O)=O)CC1)OCC2=CC=CC=C2	C1([Se][Se]C2=CC=CC=C2)=CC=CC=C1	NC(C1=CN(CC2=CC=C(OC)C=C2)C=CC1)=O	[H]C(N(C)C)=O	O=C(N1CCC([Se]C2=CC=CC=C2)CC1)OCC3=CC=CC=C3	0.818366
343	CC(C1=CC=C2C=C(OC)C=CC2=C1)C(O)=O	C1([Se][Se]C2=CC=CC=C2)=CC=CC=C1	NC(C1=CN(CC2=CC=CC=C2)C=C(C(N)=O)C1)=O	[H]C(N(C)C)=O	CC(C1=CC=C2C=C(OC)C=CC2=C1)[Se]C3=CC=CC=C3	0.640687
344	O=C(CCCC1=CNC2=C1C=CC=C2)O	C1([Se][Se]C2=CC=CC=C2)=CC=CC=C1	NC(C1=CN(CC2=CC=CC=C2)C=CC1)=O	CC#N	C1(CCC[Se]C2=CC=CC=C2)=CNC3=C1C=CC=C3	0.618356
345	O=C(CCCC1=CNC2=C1C=CC=C2)O	C1([Se][Se]C2=CC=CC=C2)=CC=CC=C1	NC(C1=CN(CC2=CC=CC=C2)C=C(C(N)=O)C1)=O	CC#N	C1(CCC[Se]C2=CC=CC=C2)=CNC3=C1C=CC=C3	0.40139
346	CC1=CC=C(S(N2CCC(C(O)=O)CC2)(=O)=O)C=C1	C1([Se][Se]C2=CC=CC=C2)=CC=CC=C1	NC(C1=CN(CC2=CC=C(C(F)(F)F)C=C2)C=CC1)=O	CC#N	CC1=CC=C(S(N2CCC([Se]C3=CC=CC=C3)CC2)(=O)=O)C=C1	0.910205
347	O=C(CCC1=CC=CC=C1)O	C1([Se][Se]C2=CC=CC=C2)=CC=CC=C1	NC(C1=CN(CC2=CC=CC=C2)C=CC1)=O	CC#N	C1(CC[Se]C2=CC=CC=C2)=CC=CC=C1	0.055
348	O=C(CCC1=CC=CC=C1)O	C1([Se][Se]C2=CC=CC=C2)=CC=CC=C1	NC(C1=CN(CC2=CC=C(OC)C=C2)C=CC1)=O	CC#N	C1(CC[Se]C2=CC=CC=C2)=CC=CC=C1	0.275066
349	FC1(F)CCC(C(O)=O)CC1	C1([Se][Se]C2=CC=CC=C2)=CC=CC=C1	NC(C1=CN(CC2=CC=C(OC)C=C2)C=CC1)=O	CC#N	FC1(F)CCC([Se]C2=CC=CC=C2)CC1	0.147972
350	O=C1C2=CC(CC(O)=O)=CC=C2OCC3=CC=CC=C13	C1([Se][Se]C2=CC=CC=C2)=CC=CC=C1	NC(C1=CN(CC2=CC=C(C(F)(F)F)C=C2)C=CC1)=O	CC#N	O=C1C2=CC(C[Se]C3=CC=CC=C3)=CC=C2OCC4=CC=CC=C14	0.591001
351	CC(C1=CC=C(CC2C(CCC2)=O)C=C1)C(O)=O	C1([Se][Se]C2=CC=CC=C2)=CC=CC=C1	NC(C1=CN(CC2=CC=C(OC)C=C2)C=CC1)=O	CC#N	CC(C1=CC=C(CC2C(CCC2)=O)C=C1)[Se]C3=CC=CC=C3	0.583852
352	CC(N1C(C2=CC=C(Cl)C=C2)=O)=C(CC(O)=O)C3=C1C=CC(OC)=C3	C1([Se][Se]C2=CC=CC=C2)=CC=CC=C1	NC(C1=CN(CC2=CC=CC=C2)C=C(C(N)=O)C1C3=CC=CC=C3)=O	CC#N	CC(N1C(C2=CC=C(Cl)C=C2)=O)=C(C[Se]C3=CC=CC=C3)C4=C1C=CC(OC)=C4	0.210031
353	CC1=CC=C(CC(O)=O)C=C1	C1([Se][Se]C2=CC=CC=C2)=CC=CC=C1	NC(C1=CN(CC2=CC=CC=C2)C=C(C(N)=O)C1)=O	CC#N	CC1=CC=C(C[Se]C2=CC=CC=C2)C=C1	0.157975
354	BrC1=CC=C(CC(O)=O)C=C1	C1([Se][Se]C2=CC=CC=C2)=CC=CC=C1	NC(C1=CN(CC2=CC=C(C(F)(F)F)C=C2)C=CC1)=O	CC#N	BrC1=CC=C(C[Se]C2=CC=CC=C2)C=C1	0.320082
355	CC1=C(CC(O)=O)C=CC=C1	C1([Se][Se]C2=CC=CC=C2)=CC=CC=C1	NC(C1=CN(CC2=CC=C(C(F)(F)F)C=C2)C=CC1)=O	CC#N	CC1=C(C[Se]C2=CC=CC=C2)C=CC=C1	0.243729
356	CC(C1=CC=C2C=C(OC)C=CC2=C1)C(O)=O	C1([Se][Se]C2=CC=CC=C2)=CC=CC=C1	NC(C1=CN(CC2=CC=CC=C2)C=CC1)=O	CC#N	CC(C1=CC=C2C=C(OC)C=CC2=C1)[Se]C3=CC=CC=C3	0.27467
357	CC(C1=CC=C2C=C(OC)C=CC2=C1)C(O)=O	C1([Se][Se]C2=CC=CC=C2)=CC=CC=C1	NC(C1=CN(CC2=CC=C(C(F)(F)F)C=C2)C=CC1)=O	CC#N	CC(C1=CC=C2C=C(OC)C=CC2=C1)[Se]C3=CC=CC=C3	0.106838
358	CC(C1=CC=C2C=C(OC)C=CC2=C1)C(O)=O	C1([Se][Se]C2=CC=CC=C2)=CC=CC=C1	NC(C1=CN(CC2=CC=CC=C2)C=C(C(N)=O)C1)=O	CC#N	CC(C1=CC=C2C=C(OC)C=CC2=C1)[Se]C3=CC=CC=C3	0.0229217
359	O=C(C1(C2=CC=CC=C2)CC1)O	C1([Se][Se]C2=CC=CC=C2)=CC=CC=C1	NC(C1=CN(CC2=CC=CC=C2)C=CC1)=O	CC#N	C1(C2([Se]C3=CC=CC=C3)CC2)=CC=CC=C1	0.262508
360	O=C(C1(C2=CC=CC=C2)CC1)O	C1([Se][Se]C2=CC=CC=C2)=CC=CC=C1	NC(C1=CN(CC2=CC=CC=C2)C=C(C(N)=O)C1C3=CC=CC=C3)=O	CC#N	C1(C2([Se]C3=CC=CC=C3)CC2)=CC=CC=C1	0
361	O=C(CCCC1=CNC2=C1C=CC=C2)O	C1(C[Se][Se]CC2=CC=CC=C2)=CC=CC=C1	NC(C1=CN(CC2=CC=CC=C2)C=CC1)=O	CS(C)=O	C1(CCC[Se]CC2=CC=CC=C2)=CNC3=C1C=CC=C3	0.0955926
362	CC1=CC=C(S(N2CCC(C(O)=O)CC2)(=O)=O)C=C1	C1(C[Se][Se]CC2=CC=CC=C2)=CC=CC=C1	NC(C1=CN(CC2=CC=CC=C2)C=CC1)=O	CS(C)=O	CC1=CC=C(S(N2CCC([Se]CC3=CC=CC=C3)CC2)(=O)=O)C=C1	0.13955
363	CC1=CC=C(S(N2CCC(C(O)=O)CC2)(=O)=O)C=C1	C1(C[Se][Se]CC2=CC=CC=C2)=CC=CC=C1	NC(C1=CN(CC2=CC=C(OC)C=C2)C=CC1)=O	CS(C)=O	CC1=CC=C(S(N2CCC([Se]CC3=CC=CC=C3)CC2)(=O)=O)C=C1	0.156542
364	O=C1C2=CC(CC(O)=O)=CC=C2OCC3=CC=CC=C13	C1(C[Se][Se]CC2=CC=CC=C2)=CC=CC=C1	NC(C1=CN(CC2=CC=CC=C2)C=C(C(N)=O)C1C3=CC=CC=C3)=O	CS(C)=O	O=C1C2=CC(C[Se]CC3=CC=CC=C3)=CC=C2OCC4=CC=CC=C14	0.281768
365	CC(C1=CC=C(CC2C(CCC2)=O)C=C1)C(O)=O	C1(C[Se][Se]CC2=CC=CC=C2)=CC=CC=C1	NC(C1=CN(CC2=CC=CC=C2)C=CC1)=O	[H]C(N(C)C)=O	CC(C1=CC=C(CC2C(CCC2)=O)C=C1)[Se]CC3=CC=CC=C3	0.125342
366	CC(C1=CC=C(CC2C(CCC2)=O)C=C1)C(O)=O	C1(C[Se][Se]CC2=CC=CC=C2)=CC=CC=C1	NC(C1=CN(CC2=CC=C(OC)C=C2)C=CC1)=O	[H]C(N(C)C)=O	CC(C1=CC=C(CC2C(CCC2)=O)C=C1)[Se]CC3=CC=CC=C3	0.177377
367	CC(C1=CC=C(CC2C(CCC2)=O)C=C1)C(O)=O	C1(C[Se][Se]CC2=CC=CC=C2)=CC=CC=C1	NC(C1=CN(CC2=CC=CC=C2)C=C(C(N)=O)C1C3=CC=CC=C3)=O	[H]C(N(C)C)=O	CC(C1=CC=C(CC2C(CCC2)=O)C=C1)[Se]CC3=CC=CC=C3	0
368	CC(N1C(C2=CC=C(Cl)C=C2)=O)=C(CC(O)=O)C3=C1C=CC(OC)=C3	C1(C[Se][Se]CC2=CC=CC=C2)=CC=CC=C1	NC(C1=CN(CC2=CC=C(C(F)(F)F)C=C2)C=CC1)=O	[H]C(N(C)C)=O	CC(N1C(C2=CC=C(Cl)C=C2)=O)=C(C[Se]CC3=CC=CC=C3)C4=C1C=CC(OC)=C4	0
369	CC(N(C(C1=C2C=CC=C1)=O)C2=O)C(O)=O	C1(C[Se][Se]CC2=CC=CC=C2)=CC=CC=C1	NC(C1=CN(CC2=CC=C(OC)C=C2)C=CC1)=O	CC#N	CC(N(C(C1=C2C=CC=C1)=O)C2=O)[Se]CC3=CC=CC=C3	0.244122
370	CC1=CC=C(S(N2CCC(C(O)=O)CC2)(=O)=O)C=C1	C1(C[Se][Se]CC2=CC=CC=C2)=CC=CC=C1	NC(C1=CN(CC2=CC=C(C(F)(F)F)C=C2)C=CC1)=O	CC#N	CC1=CC=C(S(N2CCC([Se]CC3=CC=CC=C3)CC2)(=O)=O)C=C1	0
371	O=C1C2=CC(CC(O)=O)=CC=C2OCC3=CC=CC=C13	C1(C[Se][Se]CC2=CC=CC=C2)=CC=CC=C1	NC(C1=CN(CC2=CC=C(OC)C=C2)C=CC1)=O	CC#N	O=C1C2=CC(C[Se]CC3=CC=CC=C3)=CC=C2OCC4=CC=CC=C14	0.360594
372	CC(C1=CC=C(CC2C(CCC2)=O)C=C1)C(O)=O	C1(C[Se][Se]CC2=CC=CC=C2)=CC=CC=C1	NC(C1=CN(CC2=CC=C(C(F)(F)F)C=C2)C=CC1)=O	CC#N	CC(C1=CC=C(CC2C(CCC2)=O)C=C1)[Se]CC3=CC=CC=C3	0
373	CC(C1=CC=C(CC2C(CCC2)=O)C=C1)C(O)=O	C1(C[Se][Se]CC2=CC=CC=C2)=CC=CC=C1	NC(C1=CN(CC2=CC=CC=C2)C=C(C(N)=O)C1C3=CC=CC=C3)=O	CC#N	CC(C1=CC=C(CC2C(CCC2)=O)C=C1)[Se]CC3=CC=CC=C3	0
374	CC(N1C(C2=CC=C(Cl)C=C2)=O)=C(CC(O)=O)C3=C1C=CC(OC)=C3	C1(C[Se][Se]CC2=CC=CC=C2)=CC=CC=C1	NC(C1=CN(CC2=CC=CC=C2)C=CC1)=O	CC#N	CC(N1C(C2=CC=C(Cl)C=C2)=O)=C(C[Se]CC3=CC=CC=C3)C4=C1C=CC(OC)=C4	0
375	O=C(C1CCCCC1)O	C1(C[Se][Se]CC2=CC=CC=C2)=CC=CC=C1	NC(C1=CN(CC2=CC=CC=C2)C=C(C(N)=O)C1C3=CC=CC=C3)=O	CS(C)=O	C1([Se]CC2=CC=CC=C2)CCCCC1	0
376	O=C(C1CCC1)O	C1(C[Se][Se]CC2=CC=CC=C2)=CC=CC=C1	NC(C1=CN(CC2=CC=CC=C2)C=CC1)=O	CS(C)=O	C1([Se]CC2=CC=CC=C2)CCC1	0.067199
377	O=C(C1CCC1)O	C1(C[Se][Se]CC2=CC=CC=C2)=CC=CC=C1	NC(C1=CN(CC2=CC=C(OC)C=C2)C=CC1)=O	CS(C)=O	C1([Se]CC2=CC=CC=C2)CCC1	0.074645
378	O=C(C1CCC1)O	C1(C[Se][Se]CC2=CC=CC=C2)=CC=CC=C1	NC(C1=CN(CC2=CC=CC=C2)C=C(C(N)=O)C1C3=CC=CC=C3)=O	CS(C)=O	C1([Se]CC2=CC=CC=C2)CCC1	0.0092274
379	CC(C1=CC=C2C=C(OC)C=CC2=C1)C(O)=O	C1(C[Se][Se]CC2=CC=CC=C2)=CC=CC=C1	NC(C1=CN(CC2=CC=C(C(F)(F)F)C=C2)C=CC1)=O	CS(C)=O	CC(C1=CC=C2C=C(OC)C=CC2=C1)[Se]CC3=CC=CC=C3	0.0324166
380	CC(C1=CC=C2C=C(OC)C=CC2=C1)C(O)=O	C1(C[Se][Se]CC2=CC=CC=C2)=CC=CC=C1	NC(C1=CN(CC2=CC=CC=C2)C=C(C(N)=O)C1C3=CC=CC=C3)=O	CS(C)=O	CC(C1=CC=C2C=C(OC)C=CC2=C1)[Se]CC3=CC=CC=C3	0
381	O=C(C1CCC1)O	C1(C[Se][Se]CC2=CC=CC=C2)=CC=CC=C1	NC(C1=CN(CC2=CC=C(OC)C=C2)C=CC1)=O	[H]C(N(C)C)=O	C1([Se]CC2=CC=CC=C2)CCC1	0.0176136
382	CC(C1=CC=C2C=C(OC)C=CC2=C1)C(O)=O	C1(C[Se][Se]CC2=CC=CC=C2)=CC=CC=C1	NC(C1=CN(CC2=CC=C(C(F)(F)F)C=C2)C=CC1)=O	[H]C(N(C)C)=O	CC(C1=CC=C2C=C(OC)C=CC2=C1)[Se]CC3=CC=CC=C3	0.0622875
383	O=C(N1CCC(C(O)=O)CC1)OCC2=CC=CC=C2	C1(C[Se][Se]CC2=CC=CC=C2)=CC=CC=C1	NC(C1=CN(CC2=CC=CC=C2)C=CC1)=O	CC#N	O=C(N1CCC([Se]CC2=CC=CC=C2)CC1)OCC3=CC=CC=C3	0.0245298
384	O=C(OCC1=CC=CC=C1)[C@H](NC(OC(C)(C)C)=O)CC(O)=O	C1(C[Se][Se]CC2=CC=CC=C2)=CC=CC=C1	NC(C1=CN(CC2=CC=CC=C2)C=CC1)=O	CC#N	O=C(OCC1=CC=CC=C1)[C@H](NC(OC(C)(C)C)=O)C[Se]CC2=CC=CC=C2	0.0508345
385	CC(N(C(C1=C2C=CC=C1)=O)C2=O)C(O)=O	CC[Se][Se]CC	NC(C1=CN(CC2=CC=C(C(F)(F)F)C=C2)C=CC1)=O	CS(C)=O	CC(N(C(C1=C2C=CC=C1)=O)C2=O)[Se]CC	0
386	O=C(CCCC1=CNC2=C1C=CC=C2)O	CC[Se][Se]CC	NC(C1=CN(CC2=CC=C(C(F)(F)F)C=C2)C=CC1)=O	CS(C)=O	CC[Se]CCCC1=CNC2=C1C=CC=C2	0.586575
387	O=C(CCCC1=CNC2=C1C=CC=C2)O	CC[Se][Se]CC	NC(C1=CN(CC2=CC=CC=C2)C=C(C(N)=O)C1)=O	CS(C)=O	CC[Se]CCCC1=CNC2=C1C=CC=C2	0.290272
388	CC1=CC=C(S(N2CCC(C(O)=O)CC2)(=O)=O)C=C1	CC[Se][Se]CC	NC(C1=CN(CC2=CC=C(C(F)(F)F)C=C2)C=CC1)=O	CS(C)=O	CC1=CC=C(S(N2CCC([Se]CC)CC2)(=O)=O)C=C1	0.367434
389	O=C1C2=CC(CC(O)=O)=CC=C2OCC3=CC=CC=C13	CC[Se][Se]CC	NC(C1=CN(CC2=CC=CC=C2)C=CC1)=O	CS(C)=O	O=C1C2=CC(C[Se]CC)=CC=C2OCC3=CC=CC=C13	0.0111798
390	O=C1C2=CC(CC(O)=O)=CC=C2OCC3=CC=CC=C13	CC[Se][Se]CC	NC(C1=CN(CC2=CC=C(OC)C=C2)C=CC1)=O	CS(C)=O	O=C1C2=CC(C[Se]CC)=CC=C2OCC3=CC=CC=C13	0
391	CC(C1=CC=C(CC2C(CCC2)=O)C=C1)C(O)=O	CC[Se][Se]CC	NC(C1=CN(CC2=CC=C(C(F)(F)F)C=C2)C=CC1)=O	CS(C)=O	CC(C1=CC=C(CC2C(CCC2)=O)C=C1)[Se]CC	0.371416
392	CC(N1C(C2=CC=C(Cl)C=C2)=O)=C(CC(O)=O)C3=C1C=CC(OC)=C3	CC[Se][Se]CC	NC(C1=CN(CC2=CC=CC=C2)C=C(C(N)=O)C1C3=CC=CC=C3)=O	CS(C)=O	CC(N1C(C2=CC=C(Cl)C=C2)=O)=C(C[Se]CC)C3=C1C=CC(OC)=C3	0.0086491
393	CC(N(C(C1=C2C=CC=C1)=O)C2=O)C(O)=O	CC[Se][Se]CC	NC(C1=CN(CC2=CC=CC=C2)C=CC1)=O	[H]C(N(C)C)=O	CC(N(C(C1=C2C=CC=C1)=O)C2=O)[Se]CC	0
394	CC(N(C(C1=C2C=CC=C1)=O)C2=O)C(O)=O	CC[Se][Se]CC	NC(C1=CN(CC2=CC=C(OC)C=C2)C=CC1)=O	[H]C(N(C)C)=O	CC(N(C(C1=C2C=CC=C1)=O)C2=O)[Se]CC	0
395	O=C(CCCC1=CNC2=C1C=CC=C2)O	CC[Se][Se]CC	NC(C1=CN(CC2=CC=CC=C2)C=C(C(N)=O)C1)=O	[H]C(N(C)C)=O	CC[Se]CCCC1=CNC2=C1C=CC=C2	0.0991728
396	CC1=CC=C(S(N2CCC(C(O)=O)CC2)(=O)=O)C=C1	CC[Se][Se]CC	NC(C1=CN(CC2=CC=CC=C2)C=CC1)=O	[H]C(N(C)C)=O	CC1=CC=C(S(N2CCC([Se]CC)CC2)(=O)=O)C=C1	0
397	CC(N1C(C2=CC=C(Cl)C=C2)=O)=C(CC(O)=O)C3=C1C=CC(OC)=C3	CC[Se][Se]CC	NC(C1=CN(CC2=CC=C(OC)C=C2)C=CC1)=O	[H]C(N(C)C)=O	CC(N1C(C2=CC=C(Cl)C=C2)=O)=C(C[Se]CC)C3=C1C=CC(OC)=C3	0
398	CC(N1C(C2=CC=C(Cl)C=C2)=O)=C(CC(O)=O)C3=C1C=CC(OC)=C3	CC[Se][Se]CC	NC(C1=CN(CC2=CC=CC=C2)C=C(C(N)=O)C1)=O	[H]C(N(C)C)=O	CC(N1C(C2=CC=C(Cl)C=C2)=O)=C(C[Se]CC)C3=C1C=CC(OC)=C3	0.0863474
399	CC1=CC=C(S(N2CCC(C(O)=O)CC2)(=O)=O)C=C1	CC[Se][Se]CC	NC(C1=CN(CC2=CC=CC=C2)C=C(C(N)=O)C1C3=CC=CC=C3)=O	CC#N	CC1=CC=C(S(N2CCC([Se]CC)CC2)(=O)=O)C=C1	0
400	O=C1C2=CC(CC(O)=O)=CC=C2OCC3=CC=CC=C13	CC[Se][Se]CC	NC(C1=CN(CC2=CC=C(OC)C=C2)C=CC1)=O	CC#N	O=C1C2=CC(C[Se]CC)=CC=C2OCC3=CC=CC=C13	0
401	CC(C1=CC=C(CC2C(CCC2)=O)C=C1)C(O)=O	CC[Se][Se]CC	NC(C1=CN(CC2=CC=C(C(F)(F)F)C=C2)C=CC1)=O	CC#N	CC(C1=CC=C(CC2C(CCC2)=O)C=C1)[Se]CC	0.0252625
402	CC(N1C(C2=CC=C(Cl)C=C2)=O)=C(CC(O)=O)C3=C1C=CC(OC)=C3	CC[Se][Se]CC	NC(C1=CN(CC2=CC=CC=C2)C=CC1)=O	CC#N	CC(N1C(C2=CC=C(Cl)C=C2)=O)=C(C[Se]CC)C3=C1C=CC(OC)=C3	0
403	CC(N1C(C2=CC=C(Cl)C=C2)=O)=C(CC(O)=O)C3=C1C=CC(OC)=C3	CC[Se][Se]CC	NC(C1=CN(CC2=CC=C(C(F)(F)F)C=C2)C=CC1)=O	CC#N	CC(N1C(C2=CC=C(Cl)C=C2)=O)=C(C[Se]CC)C3=C1C=CC(OC)=C3	0
404	CC1=CC=C(CC(O)=O)C=C1	CC[Se][Se]CC	NC(C1=CN(CC2=CC=C(OC)C=C2)C=CC1)=O	CS(C)=O	CC1=CC=C(C[Se]CC)C=C1	0.147866
405	BrC1=CC=C(CC(O)=O)C=C1	CC[Se][Se]CC	NC(C1=CN(CC2=CC=CC=C2)C=C(C(N)=O)C1C3=CC=CC=C3)=O	CS(C)=O	BrC1=CC=C(C[Se]CC)C=C1	0
406	COC1=CC=C(CC(O)=O)C=C1	CC[Se][Se]CC	NC(C1=CN(CC2=CC=C(C(F)(F)F)C=C2)C=CC1)=O	CS(C)=O	COC1=CC=C(C[Se]CC)C=C1	0.295182
407	COC1=CC=C(CC(O)=O)C=C1	CC[Se][Se]CC	NC(C1=CN(CC2=CC=CC=C2)C=C(C(N)=O)C1C3=CC=CC=C3)=O	CS(C)=O	COC1=CC=C(C[Se]CC)C=C1	0.0673184
408	CC1=C(CC(O)=O)C=CC=C1	CC[Se][Se]CC	NC(C1=CN(CC2=CC=C(OC)C=C2)C=CC1)=O	CS(C)=O	CC1=C(C[Se]CC)C=CC=C1	0.542056
409	O=C(CC1=CNC2=C1C=CC=C2)O	CC[Se][Se]CC	NC(C1=CN(CC2=CC=CC=C2)C=C(C(N)=O)C1)=O	CS(C)=O	CC[Se]CC1=CNC2=C1C=CC=C2	0.215
410	CC1=CC=C(CC(O)=O)C=C1	CC[Se][Se]CC	NC(C1=CN(CC2=CC=CC=C2)C=C(C(N)=O)C1)=O	[H]C(N(C)C)=O	CC1=CC=C(C[Se]CC)C=C1	0.0722416
411	COC1=CC=C(CC(O)=O)C=C1	CC[Se][Se]CC	NC(C1=CN(CC2=CC=CC=C2)C=C(C(N)=O)C1C3=CC=CC=C3)=O	[H]C(N(C)C)=O	COC1=CC=C(C[Se]CC)C=C1	0.043808
412	CC1=C(CC(O)=O)C=CC=C1	CC[Se][Se]CC	NC(C1=CN(CC2=CC=C(OC)C=C2)C=CC1)=O	[H]C(N(C)C)=O	CC1=C(C[Se]CC)C=CC=C1	0.026829
413	O=C(CC1=CNC2=C1C=CC=C2)O	CC[Se][Se]CC	NC(C1=CN(CC2=CC=C(C(F)(F)F)C=C2)C=CC1)=O	[H]C(N(C)C)=O	CC[Se]CC1=CNC2=C1C=CC=C2	0.018175
414	O=C(CC1=CNC2=C1C=CC=C2)O	CC[Se][Se]CC	NC(C1=CN(CC2=CC=CC=C2)C=C(C(N)=O)C1C3=CC=CC=C3)=O	[H]C(N(C)C)=O	CC[Se]CC1=CNC2=C1C=CC=C2	0
415	BrC1=CC=C(CC(O)=O)C=C1	CC[Se][Se]CC	NC(C1=CN(CC2=CC=CC=C2)C=CC1)=O	CC#N	BrC1=CC=C(C[Se]CC)C=C1	0
416	BrC1=CC=C(CC(O)=O)C=C1	CC[Se][Se]CC	NC(C1=CN(CC2=CC=C(OC)C=C2)C=CC1)=O	CC#N	BrC1=CC=C(C[Se]CC)C=C1	0
417	BrC1=CC=C(CC(O)=O)C=C1	CC[Se][Se]CC	NC(C1=CN(CC2=CC=C(C(F)(F)F)C=C2)C=CC1)=O	CC#N	BrC1=CC=C(C[Se]CC)C=C1	0
418	CC1=C(CC(O)=O)C=CC=C1	CC[Se][Se]CC	NC(C1=CN(CC2=CC=C(OC)C=C2)C=CC1)=O	CC#N	CC1=C(C[Se]CC)C=CC=C1	0.0175
419	CC1=C(CC(O)=O)C=CC=C1	CC[Se][Se]CC	NC(C1=CN(CC2=CC=CC=C2)C=C(C(N)=O)C1C3=CC=CC=C3)=O	CC#N	CC1=C(C[Se]CC)C=CC=C1	0
420	O=C(CC1=CNC2=C1C=CC=C2)O	CC[Se][Se]CC	NC(C1=CN(CC2=CC=CC=C2)C=CC1)=O	CC#N	CC[Se]CC1=CNC2=C1C=CC=C2	0.132998
421	O=C(CC1=CNC2=C1C=CC=C2)O	CC[Se][Se]CC	NC(C1=CN(CC2=CC=C(C(F)(F)F)C=C2)C=CC1)=O	CC#N	CC[Se]CC1=CNC2=C1C=CC=C2	0.162522
422	O=C(CC1=CNC2=C1C=CC=C2)O	CC[Se][Se]CC	NC(C1=CN(CC2=CC=CC=C2)C=C(C(N)=O)C1C3=CC=CC=C3)=O	CC#N	CC[Se]CC1=CNC2=C1C=CC=C2	0
423	CC(C1=CC=C(CC2C(CCC2)=O)C=C1)C(O)=O	C1([Se][Se]C2=CC=CC=C2)=CC=CC=C1	NC(C1=CN(CC2=CC=CC=C2)C=CC1)=O	CS(C)=O	CC(C1=CC=C(CC2C(CCC2)=O)C=C1)[Se]C3=CC=CC=C3	0.676829
424	CC(N1C(C2=CC=C(Cl)C=C2)=O)=C(CC(O)=O)C3=C1C=CC(OC)=C3	C1([Se][Se]C2=CC=CC=C2)=CC=CC=C1	NC(C1=CN(CC2=CC=C(C(F)(F)F)C=C2)C=CC1)=O	CS(C)=O	CC(N1C(C2=CC=C(Cl)C=C2)=O)=C(C[Se]C3=CC=CC=C3)C4=C1C=CC(OC)=C4	0.794649
425	COC1=CC=C(CC(O)=O)C=C1	C1([Se][Se]C2=CC=CC=C2)=CC=CC=C1	NC(C1=CN(CC2=CC=CC=C2)C=CC1)=O	CS(C)=O	COC1=CC=C(C[Se]C2=CC=CC=C2)C=C1	0.163936
426	COC1=CC=C(CC(O)=O)C=C1	C1([Se][Se]C2=CC=CC=C2)=CC=CC=C1	NC(C1=CN(CC2=CC=C(OC)C=C2)C=CC1)=O	CS(C)=O	COC1=CC=C(C[Se]C2=CC=CC=C2)C=C1	0.158016
427	CC1=C(CC(O)=O)C=CC=C1	C1([Se][Se]C2=CC=CC=C2)=CC=CC=C1	NC(C1=CN(CC2=CC=CC=C2)C=CC1)=O	CS(C)=O	CC1=C(C[Se]C2=CC=CC=C2)C=CC=C1	0.306954
428	CC1=C(CC(O)=O)C=CC=C1	C1([Se][Se]C2=CC=CC=C2)=CC=CC=C1	NC(C1=CN(CC2=CC=C(C(F)(F)F)C=C2)C=CC1)=O	CS(C)=O	CC1=C(C[Se]C2=CC=CC=C2)C=CC=C1	0.259409
429	CC1=C(CC(O)=O)C=CC=C1	C1([Se][Se]C2=CC=CC=C2)=CC=CC=C1	NC(C1=CN(CC2=CC=CC=C2)C=C(C(N)=O)C1)=O	CS(C)=O	CC1=C(C[Se]C2=CC=CC=C2)C=CC=C1	0.2063
430	O=C(CCCC1=CNC2=C1C=CC=C2)O	C1([Se][Se]C2=CC=CC=C2)=CC=CC=C1	NC(C1=CN(CC2=CC=CC=C2)C=C(C(N)=O)C1)=O	CS(C)=O	C1(CCC[Se]C2=CC=CC=C2)=CNC3=C1C=CC=C3	0.749577
431	CC1=CC=C(S(N2CCC(C(O)=O)CC2)(=O)=O)C=C1	C1([Se][Se]C2=CC=CC=C2)=CC=CC=C1	NC(C1=CN(CC2=CC=CC=C2)C=C(C(N)=O)C1)=O	CS(C)=O	CC1=CC=C(S(N2CCC([Se]C3=CC=CC=C3)CC2)(=O)=O)C=C1	0.99
432	O=C(CCC1=CC=CC=C1)O	C1([Se][Se]C2=CC=CC=C2)=CC=CC=C1	NC(C1=CN(CC2=CC=CC=C2)C=C(C(N)=O)C1C3=CC=CC=C3)=O	CS(C)=O	C1(CC[Se]C2=CC=CC=C2)=CC=CC=C1	0.646181
433	FC1(F)CCC(C(O)=O)CC1	C1([Se][Se]C2=CC=CC=C2)=CC=CC=C1	NC(C1=CN(CC2=CC=CC=C2)C=CC1)=O	CS(C)=O	FC1(F)CCC([Se]C2=CC=CC=C2)CC1	0.267646
434	O=C1C2=CC(CC(O)=O)=CC=C2OCC3=CC=CC=C13	C1([Se][Se]C2=CC=CC=C2)=CC=CC=C1	NC(C1=CN(CC2=CC=C(OC)C=C2)C=CC1)=O	CS(C)=O	O=C1C2=CC(C[Se]C3=CC=CC=C3)=CC=C2OCC4=CC=CC=C14	0.711339
435	O=C(OCC1=CC=CC=C1)[C@H](NC(OC(C)(C)C)=O)CC(O)=O	C1([Se][Se]C2=CC=CC=C2)=CC=CC=C1	NC(C1=CN(CC2=CC=C(OC)C=C2)C=CC1)=O	CS(C)=O	O=C(OCC1=CC=CC=C1)[C@H](NC(OC(C)(C)C)=O)C[Se]C2=CC=CC=C2	0.85502
436	O=C(C1CCC1)O	C1([Se][Se]C2=CC=CC=C2)=CC=CC=C1	NC(C1=CN(CC2=CC=C(C(F)(F)F)C=C2)C=CC1)=O	CS(C)=O	C1([Se]C2=CC=CC=C2)CCC1	0.68023
437	CC(C1=CC=C2C=C(OC)C=CC2=C1)C(O)=O	C1([Se][Se]C2=CC=CC=C2)=CC=CC=C1	NC(C1=CN(CC2=CC=CC=C2)C=C(C(N)=O)C1)=O	CS(C)=O	CC(C1=CC=C2C=C(OC)C=CC2=C1)[Se]C3=CC=CC=C3	0.640687
438	CC(C1=CC=C2C=C(OC)C=CC2=C1)C(O)=O	C1([Se][Se]C2=CC=CC=C2)=CC=CC=C1	NC(C1=CN(CC2=CC=CC=C2)C=C(C(N)=O)C1C3=CC=CC=C3)=O	CS(C)=O	CC(C1=CC=C2C=C(OC)C=CC2=C1)[Se]C3=CC=CC=C3	0.318711
439	O=C(C1(C2=CC=CC=C2)CC1)O	C1([Se][Se]C2=CC=CC=C2)=CC=CC=C1	NC(C1=CN(CC2=CC=CC=C2)C=CC1)=O	CS(C)=O	C1(C2([Se]C3=CC=CC=C3)CC2)=CC=CC=C1	0.8
440	O=C(C1(C2=CC=CC=C2)CC1)O	C1([Se][Se]C2=CC=CC=C2)=CC=CC=C1	NC(C1=CN(CC2=CC=CC=C2)C=C(C(N)=O)C1C3=CC=CC=C3)=O	CS(C)=O	C1(C2([Se]C3=CC=CC=C3)CC2)=CC=CC=C1	0.418743
441	O=C(CCCC1=CNC2=C1C=CC=C2)O	C1([Se][Se]C2=CC=CC=C2)=CC=CC=C1	NC(C1=CN(CC2=CC=C(C(F)(F)F)C=C2)C=CC1)=O	[H]C(N(C)C)=O	C1(CCC[Se]C2=CC=CC=C2)=CNC3=C1C=CC=C3	0.629424
442	O=C(CCCC1=CNC2=C1C=CC=C2)O	C1([Se][Se]C2=CC=CC=C2)=CC=CC=C1	NC(C1=CN(CC2=CC=CC=C2)C=C(C(N)=O)C1)=O	[H]C(N(C)C)=O	C1(CCC[Se]C2=CC=CC=C2)=CNC3=C1C=CC=C3	0.51044
443	O=C(CCC1=CC=CC=C1)O	C1([Se][Se]C2=CC=CC=C2)=CC=CC=C1	NC(C1=CN(CC2=CC=CC=C2)C=CC1)=O	[H]C(N(C)C)=O	C1(CC[Se]C2=CC=CC=C2)=CC=CC=C1	0.0821093
444	FC1(F)CCC(C(O)=O)CC1	C1([Se][Se]C2=CC=CC=C2)=CC=CC=C1	NC(C1=CN(CC2=CC=C(C(F)(F)F)C=C2)C=CC1)=O	[H]C(N(C)C)=O	FC1(F)CCC([Se]C2=CC=CC=C2)CC1	0.251859
445	O=C1C2=CC(CC(O)=O)=CC=C2OCC3=CC=CC=C13	C1([Se][Se]C2=CC=CC=C2)=CC=CC=C1	NC(C1=CN(CC2=CC=CC=C2)C=CC1)=O	[H]C(N(C)C)=O	O=C1C2=CC(C[Se]C3=CC=CC=C3)=CC=C2OCC4=CC=CC=C14	0.69746
446	O=C1C2=CC(CC(O)=O)=CC=C2OCC3=CC=CC=C13	C1([Se][Se]C2=CC=CC=C2)=CC=CC=C1	NC(C1=CN(CC2=CC=CC=C2)C=C(C(N)=O)C1C3=CC=CC=C3)=O	[H]C(N(C)C)=O	O=C1C2=CC(C[Se]C3=CC=CC=C3)=CC=C2OCC4=CC=CC=C14	0.235
447	CC1=C(CC(O)=O)C=CC=C1	C1([Se][Se]C2=CC=CC=C2)=CC=CC=C1	NC(C1=CN(CC2=CC=C(OC)C=C2)C=CC1)=O	[H]C(N(C)C)=O	CC1=C(C[Se]C2=CC=CC=C2)C=CC=C1	0.625608
448	CC1=C(CC(O)=O)C=CC=C1	C1([Se][Se]C2=CC=CC=C2)=CC=CC=C1	NC(C1=CN(CC2=CC=CC=C2)C=C(C(N)=O)C1C3=CC=CC=C3)=O	[H]C(N(C)C)=O	CC1=C(C[Se]C2=CC=CC=C2)C=CC=C1	0.286722
449	O=C(N1CCC(C(O)=O)CC1)OCC2=CC=CC=C2	C1([Se][Se]C2=CC=CC=C2)=CC=CC=C1	NC(C1=CN(CC2=CC=CC=C2)C=CC1)=O	[H]C(N(C)C)=O	O=C(N1CCC([Se]C2=CC=CC=C2)CC1)OCC3=CC=CC=C3	0.841868
450	O=C(OCC1=CC=CC=C1)[C@H](NC(OC(C)(C)C)=O)CC(O)=O	C1([Se][Se]C2=CC=CC=C2)=CC=CC=C1	NC(C1=CN(CC2=CC=CC=C2)C=CC1)=O	[H]C(N(C)C)=O	O=C(OCC1=CC=CC=C1)[C@H](NC(OC(C)(C)C)=O)C[Se]C2=CC=CC=C2	0.871815
451	O=C(OCC1=CC=CC=C1)[C@H](NC(OC(C)(C)C)=O)CC(O)=O	C1([Se][Se]C2=CC=CC=C2)=CC=CC=C1	NC(C1=CN(CC2=CC=C(C(F)(F)F)C=C2)C=CC1)=O	[H]C(N(C)C)=O	O=C(OCC1=CC=CC=C1)[C@H](NC(OC(C)(C)C)=O)C[Se]C2=CC=CC=C2	0.812668
452	CC(C1=CC=C2C=C(OC)C=CC2=C1)C(O)=O	C1([Se][Se]C2=CC=CC=C2)=CC=CC=C1	NC(C1=CN(CC2=CC=C(OC)C=C2)C=CC1)=O	[H]C(N(C)C)=O	CC(C1=CC=C2C=C(OC)C=CC2=C1)[Se]C3=CC=CC=C3	0.605574
453	O=C(CCC1=CC=CC=C1)O	C1([Se][Se]C2=CC=CC=C2)=CC=CC=C1	NC(C1=CN(CC2=CC=CC=C2)C=C(C(N)=O)C1)=O	CC#N	C1(CC[Se]C2=CC=CC=C2)=CC=CC=C1	0.0640859
454	FC1(F)CCC(C(O)=O)CC1	C1([Se][Se]C2=CC=CC=C2)=CC=CC=C1	NC(C1=CN(CC2=CC=CC=C2)C=CC1)=O	CC#N	FC1(F)CCC([Se]C2=CC=CC=C2)CC1	0.233017
455	FC1(F)CCC(C(O)=O)CC1	C1([Se][Se]C2=CC=CC=C2)=CC=CC=C1	NC(C1=CN(CC2=CC=C(C(F)(F)F)C=C2)C=CC1)=O	CC#N	FC1(F)CCC([Se]C2=CC=CC=C2)CC1	0.22385
456	O=C1C2=CC(CC(O)=O)=CC=C2OCC3=CC=CC=C13	C1([Se][Se]C2=CC=CC=C2)=CC=CC=C1	NC(C1=CN(CC2=CC=CC=C2)C=C(C(N)=O)C1C3=CC=CC=C3)=O	CC#N	O=C1C2=CC(C[Se]C3=CC=CC=C3)=CC=C2OCC4=CC=CC=C14	0.38045
457	CC(C1=CC=C(CC2C(CCC2)=O)C=C1)C(O)=O	C1([Se][Se]C2=CC=CC=C2)=CC=CC=C1	NC(C1=CN(CC2=CC=C(C(F)(F)F)C=C2)C=CC1)=O	CC#N	CC(C1=CC=C(CC2C(CCC2)=O)C=C1)[Se]C3=CC=CC=C3	0.582821
458	CC(C1=CC=C(CC2C(CCC2)=O)C=C1)C(O)=O	C1([Se][Se]C2=CC=CC=C2)=CC=CC=C1	NC(C1=CN(CC2=CC=CC=C2)C=C(C(N)=O)C1C3=CC=CC=C3)=O	CC#N	CC(C1=CC=C(CC2C(CCC2)=O)C=C1)[Se]C3=CC=CC=C3	0.216658
459	CC(N1C(C2=CC=C(Cl)C=C2)=O)=C(CC(O)=O)C3=C1C=CC(OC)=C3	C1([Se][Se]C2=CC=CC=C2)=CC=CC=C1	NC(C1=CN(CC2=CC=C(OC)C=C2)C=CC1)=O	CC#N	CC(N1C(C2=CC=C(Cl)C=C2)=O)=C(C[Se]C3=CC=CC=C3)C4=C1C=CC(OC)=C4	0.54091
460	CC(N1C(C2=CC=C(Cl)C=C2)=O)=C(CC(O)=O)C3=C1C=CC(OC)=C3	C1([Se][Se]C2=CC=CC=C2)=CC=CC=C1	NC(C1=CN(CC2=CC=C(C(F)(F)F)C=C2)C=CC1)=O	CC#N	CC(N1C(C2=CC=C(Cl)C=C2)=O)=C(C[Se]C3=CC=CC=C3)C4=C1C=CC(OC)=C4	0.524653
461	CC1=C(CC(O)=O)C=CC=C1	C1([Se][Se]C2=CC=CC=C2)=CC=CC=C1	NC(C1=CN(CC2=CC=CC=C2)C=C(C(N)=O)C1)=O	CC#N	CC1=C(C[Se]C2=CC=CC=C2)C=CC=C1	0.0522798
462	CC(N(C(C1=C2C=CC=C1)=O)C2=O)C(O)=O	C1(C[Se][Se]CC2=CC=CC=C2)=CC=CC=C1	NC(C1=CN(CC2=CC=CC=C2)C=C(C(N)=O)C1)=O	CS(C)=O	CC(N(C(C1=C2C=CC=C1)=O)C2=O)[Se]CC3=CC=CC=C3	0.158555
463	O=C(CCCC1=CNC2=C1C=CC=C2)O	C1(C[Se][Se]CC2=CC=CC=C2)=CC=CC=C1	NC(C1=CN(CC2=CC=CC=C2)C=C(C(N)=O)C1C3=CC=CC=C3)=O	CS(C)=O	C1(CCC[Se]CC2=CC=CC=C2)=CNC3=C1C=CC=C3	0.0219828
464	CC1=CC=C(S(N2CCC(C(O)=O)CC2)(=O)=O)C=C1	C1(C[Se][Se]CC2=CC=CC=C2)=CC=CC=C1	NC(C1=CN(CC2=CC=CC=C2)C=C(C(N)=O)C1)=O	CS(C)=O	CC1=CC=C(S(N2CCC([Se]CC3=CC=CC=C3)CC2)(=O)=O)C=C1	0.04666
465	CC(C1=CC=C(CC2C(CCC2)=O)C=C1)C(O)=O	C1(C[Se][Se]CC2=CC=CC=C2)=CC=CC=C1	NC(C1=CN(CC2=CC=C(C(F)(F)F)C=C2)C=CC1)=O	CS(C)=O	CC(C1=CC=C(CC2C(CCC2)=O)C=C1)[Se]CC3=CC=CC=C3	0.105
466	CC(N1C(C2=CC=C(Cl)C=C2)=O)=C(CC(O)=O)C3=C1C=CC(OC)=C3	C1(C[Se][Se]CC2=CC=CC=C2)=CC=CC=C1	NC(C1=CN(CC2=CC=CC=C2)C=CC1)=O	CS(C)=O	CC(N1C(C2=CC=C(Cl)C=C2)=O)=C(C[Se]CC3=CC=CC=C3)C4=C1C=CC(OC)=C4	0.112318
467	CC(N1C(C2=CC=C(Cl)C=C2)=O)=C(CC(O)=O)C3=C1C=CC(OC)=C3	C1(C[Se][Se]CC2=CC=CC=C2)=CC=CC=C1	NC(C1=CN(CC2=CC=C(OC)C=C2)C=CC1)=O	CS(C)=O	CC(N1C(C2=CC=C(Cl)C=C2)=O)=C(C[Se]CC3=CC=CC=C3)C4=C1C=CC(OC)=C4	0.146739
468	CC(N1C(C2=CC=C(Cl)C=C2)=O)=C(CC(O)=O)C3=C1C=CC(OC)=C3	C1(C[Se][Se]CC2=CC=CC=C2)=CC=CC=C1	NC(C1=CN(CC2=CC=C(C(F)(F)F)C=C2)C=CC1)=O	CS(C)=O	CC(N1C(C2=CC=C(Cl)C=C2)=O)=C(C[Se]CC3=CC=CC=C3)C4=C1C=CC(OC)=C4	0.0824514
469	CC(N1C(C2=CC=C(Cl)C=C2)=O)=C(CC(O)=O)C3=C1C=CC(OC)=C3	C1(C[Se][Se]CC2=CC=CC=C2)=CC=CC=C1	NC(C1=CN(CC2=CC=CC=C2)C=C(C(N)=O)C1C3=CC=CC=C3)=O	CS(C)=O	CC(N1C(C2=CC=C(Cl)C=C2)=O)=C(C[Se]CC3=CC=CC=C3)C4=C1C=CC(OC)=C4	0.05
470	O=C(CCCC1=CNC2=C1C=CC=C2)O	C1(C[Se][Se]CC2=CC=CC=C2)=CC=CC=C1	NC(C1=CN(CC2=CC=C(OC)C=C2)C=CC1)=O	[H]C(N(C)C)=O	C1(CCC[Se]CC2=CC=CC=C2)=CNC3=C1C=CC=C3	0.132398
471	O=C(CCCC1=CNC2=C1C=CC=C2)O	C1(C[Se][Se]CC2=CC=CC=C2)=CC=CC=C1	NC(C1=CN(CC2=CC=C(C(F)(F)F)C=C2)C=CC1)=O	[H]C(N(C)C)=O	C1(CCC[Se]CC2=CC=CC=C2)=CNC3=C1C=CC=C3	0.0671818
472	CC1=CC=C(S(N2CCC(C(O)=O)CC2)(=O)=O)C=C1	C1(C[Se][Se]CC2=CC=CC=C2)=CC=CC=C1	NC(C1=CN(CC2=CC=C(C(F)(F)F)C=C2)C=CC1)=O	[H]C(N(C)C)=O	CC1=CC=C(S(N2CCC([Se]CC3=CC=CC=C3)CC2)(=O)=O)C=C1	0.0993352
473	O=C1C2=CC(CC(O)=O)=CC=C2OCC3=CC=CC=C13	C1(C[Se][Se]CC2=CC=CC=C2)=CC=CC=C1	NC(C1=CN(CC2=CC=CC=C2)C=CC1)=O	[H]C(N(C)C)=O	O=C1C2=CC(C[Se]CC3=CC=CC=C3)=CC=C2OCC4=CC=CC=C14	0.29609
474	O=C1C2=CC(CC(O)=O)=CC=C2OCC3=CC=CC=C13	C1(C[Se][Se]CC2=CC=CC=C2)=CC=CC=C1	NC(C1=CN(CC2=CC=C(OC)C=C2)C=CC1)=O	[H]C(N(C)C)=O	O=C1C2=CC(C[Se]CC3=CC=CC=C3)=CC=C2OCC4=CC=CC=C14	0.314543
475	CC(N1C(C2=CC=C(Cl)C=C2)=O)=C(CC(O)=O)C3=C1C=CC(OC)=C3	C1(C[Se][Se]CC2=CC=CC=C2)=CC=CC=C1	NC(C1=CN(CC2=CC=CC=C2)C=CC1)=O	[H]C(N(C)C)=O	CC(N1C(C2=CC=C(Cl)C=C2)=O)=C(C[Se]CC3=CC=CC=C3)C4=C1C=CC(OC)=C4	0.016806
476	CC(N1C(C2=CC=C(Cl)C=C2)=O)=C(CC(O)=O)C3=C1C=CC(OC)=C3	C1(C[Se][Se]CC2=CC=CC=C2)=CC=CC=C1	NC(C1=CN(CC2=CC=CC=C2)C=C(C(N)=O)C1)=O	[H]C(N(C)C)=O	CC(N1C(C2=CC=C(Cl)C=C2)=O)=C(C[Se]CC3=CC=CC=C3)C4=C1C=CC(OC)=C4	0.0151254
477	O=C(CCCC1=CNC2=C1C=CC=C2)O	C1(C[Se][Se]CC2=CC=CC=C2)=CC=CC=C1	NC(C1=CN(CC2=CC=C(C(F)(F)F)C=C2)C=CC1)=O	CC#N	C1(CCC[Se]CC2=CC=CC=C2)=CNC3=C1C=CC=C3	0.0265951
478	CC1=CC=C(S(N2CCC(C(O)=O)CC2)(=O)=O)C=C1	C1(C[Se][Se]CC2=CC=CC=C2)=CC=CC=C1	NC(C1=CN(CC2=CC=C(OC)C=C2)C=CC1)=O	CC#N	CC1=CC=C(S(N2CCC([Se]CC3=CC=CC=C3)CC2)(=O)=O)C=C1	0.0082048
479	O=C1C2=CC(CC(O)=O)=CC=C2OCC3=CC=CC=C13	C1(C[Se][Se]CC2=CC=CC=C2)=CC=CC=C1	NC(C1=CN(CC2=CC=C(C(F)(F)F)C=C2)C=CC1)=O	CC#N	O=C1C2=CC(C[Se]CC3=CC=CC=C3)=CC=C2OCC4=CC=CC=C14	0.347378
480	O=C1C2=CC(CC(O)=O)=CC=C2OCC3=CC=CC=C13	C1(C[Se][Se]CC2=CC=CC=C2)=CC=CC=C1	NC(C1=CN(CC2=CC=CC=C2)C=C(C(N)=O)C1)=O	CC#N	O=C1C2=CC(C[Se]CC3=CC=CC=C3)=CC=C2OCC4=CC=CC=C14	0.344861
481	CC(C1=CC=C(CC2C(CCC2)=O)C=C1)C(O)=O	C1(C[Se][Se]CC2=CC=CC=C2)=CC=CC=C1	NC(C1=CN(CC2=CC=C(OC)C=C2)C=CC1)=O	CC#N	CC(C1=CC=C(CC2C(CCC2)=O)C=C1)[Se]CC3=CC=CC=C3	0.03
482	CC(N1C(C2=CC=C(Cl)C=C2)=O)=C(CC(O)=O)C3=C1C=CC(OC)=C3	C1(C[Se][Se]CC2=CC=CC=C2)=CC=CC=C1	NC(C1=CN(CC2=CC=C(OC)C=C2)C=CC1)=O	CC#N	CC(N1C(C2=CC=C(Cl)C=C2)=O)=C(C[Se]CC3=CC=CC=C3)C4=C1C=CC(OC)=C4	0
483	O=C(C1CCCCC1)O	C1(C[Se][Se]CC2=CC=CC=C2)=CC=CC=C1	NC(C1=CN(CC2=CC=CC=C2)C=C(C(N)=O)C1)=O	CS(C)=O	C1([Se]CC2=CC=CC=C2)CCCCC1	0
484	O=C(N1CCC(C(O)=O)CC1)OCC2=CC=CC=C2	C1(C[Se][Se]CC2=CC=CC=C2)=CC=CC=C1	NC(C1=CN(CC2=CC=CC=C2)C=C(C(N)=O)C1)=O	CS(C)=O	O=C(N1CCC([Se]CC2=CC=CC=C2)CC1)OCC3=CC=CC=C3	0.0172731
485	O=C(OCC1=CC=CC=C1)[C@H](NC(OC(C)(C)C)=O)CC(O)=O	C1(C[Se][Se]CC2=CC=CC=C2)=CC=CC=C1	NC(C1=CN(CC2=CC=C(OC)C=C2)C=CC1)=O	CS(C)=O	O=C(OCC1=CC=CC=C1)[C@H](NC(OC(C)(C)C)=O)C[Se]CC2=CC=CC=C2	0.0442665
486	O=C(OCC1=CC=CC=C1)[C@H](NC(OC(C)(C)C)=O)CC(O)=O	C1(C[Se][Se]CC2=CC=CC=C2)=CC=CC=C1	NC(C1=CN(CC2=CC=C(C(F)(F)F)C=C2)C=CC1)=O	CS(C)=O	O=C(OCC1=CC=CC=C1)[C@H](NC(OC(C)(C)C)=O)C[Se]CC2=CC=CC=C2	0.036069
487	O=C(C1CCCCC1)O	C1(C[Se][Se]CC2=CC=CC=C2)=CC=CC=C1	NC(C1=CN(CC2=CC=C(OC)C=C2)C=CC1)=O	[H]C(N(C)C)=O	C1([Se]CC2=CC=CC=C2)CCCCC1	0.0260312
488	O=C(OCC1=CC=CC=C1)[C@H](NC(OC(C)(C)C)=O)CC(O)=O	C1(C[Se][Se]CC2=CC=CC=C2)=CC=CC=C1	NC(C1=CN(CC2=CC=C(OC)C=C2)C=CC1)=O	[H]C(N(C)C)=O	O=C(OCC1=CC=CC=C1)[C@H](NC(OC(C)(C)C)=O)C[Se]CC2=CC=CC=C2	0.0362294
489	CC(C1=CC=C2C=C(OC)C=CC2=C1)C(O)=O	C1(C[Se][Se]CC2=CC=CC=C2)=CC=CC=C1	NC(C1=CN(CC2=CC=CC=C2)C=C(C(N)=O)C1)=O	[H]C(N(C)C)=O	CC(C1=CC=C2C=C(OC)C=CC2=C1)[Se]CC3=CC=CC=C3	0.0084575
490	O=C(C1CCCCC1)O	C1(C[Se][Se]CC2=CC=CC=C2)=CC=CC=C1	NC(C1=CN(CC2=CC=CC=C2)C=C(C(N)=O)C1C3=CC=CC=C3)=O	CC#N	C1([Se]CC2=CC=CC=C2)CCCCC1	0
491	O=C(N1CCC(C(O)=O)CC1)OCC2=CC=CC=C2	C1(C[Se][Se]CC2=CC=CC=C2)=CC=CC=C1	NC(C1=CN(CC2=CC=CC=C2)C=C(C(N)=O)C1)=O	CC#N	O=C(N1CCC([Se]CC2=CC=CC=C2)CC1)OCC3=CC=CC=C3	0
492	O=C(N1CCC(C(O)=O)CC1)OCC2=CC=CC=C2	C1(C[Se][Se]CC2=CC=CC=C2)=CC=CC=C1	NC(C1=CN(CC2=CC=CC=C2)C=C(C(N)=O)C1C3=CC=CC=C3)=O	CC#N	O=C(N1CCC([Se]CC2=CC=CC=C2)CC1)OCC3=CC=CC=C3	0
493	O=C(OCC1=CC=CC=C1)[C@H](NC(OC(C)(C)C)=O)CC(O)=O	C1(C[Se][Se]CC2=CC=CC=C2)=CC=CC=C1	NC(C1=CN(CC2=CC=C(OC)C=C2)C=CC1)=O	CC#N	O=C(OCC1=CC=CC=C1)[C@H](NC(OC(C)(C)C)=O)C[Se]CC2=CC=CC=C2	0.055709
494	O=C(OCC1=CC=CC=C1)[C@H](NC(OC(C)(C)C)=O)CC(O)=O	C1(C[Se][Se]CC2=CC=CC=C2)=CC=CC=C1	NC(C1=CN(CC2=CC=CC=C2)C=C(C(N)=O)C1C3=CC=CC=C3)=O	CC#N	O=C(OCC1=CC=CC=C1)[C@H](NC(OC(C)(C)C)=O)C[Se]CC2=CC=CC=C2	0.0129873
495	O=C(C1CCC1)O	C1(C[Se][Se]CC2=CC=CC=C2)=CC=CC=C1	NC(C1=CN(CC2=CC=C(OC)C=C2)C=CC1)=O	CC#N	C1([Se]CC2=CC=CC=C2)CCC1	0.0305014
496	CC(C1=CC=C2C=C(OC)C=CC2=C1)C(O)=O	C1(C[Se][Se]CC2=CC=CC=C2)=CC=CC=C1	NC(C1=CN(CC2=CC=C(OC)C=C2)C=CC1)=O	CC#N	CC(C1=CC=C2C=C(OC)C=CC2=C1)[Se]CC3=CC=CC=C3	0.0687589
497	CC(C1=CC=C2C=C(OC)C=CC2=C1)C(O)=O	C1(C[Se][Se]CC2=CC=CC=C2)=CC=CC=C1	NC(C1=CN(CC2=CC=C(C(F)(F)F)C=C2)C=CC1)=O	CC#N	CC(C1=CC=C2C=C(OC)C=CC2=C1)[Se]CC3=CC=CC=C3	0.0255695
498	CC(C1=CC=C2C=C(OC)C=CC2=C1)C(O)=O	C1(C[Se][Se]CC2=CC=CC=C2)=CC=CC=C1	NC(C1=CN(CC2=CC=CC=C2)C=C(C(N)=O)C1)=O	CC#N	CC(C1=CC=C2C=C(OC)C=CC2=C1)[Se]CC3=CC=CC=C3	0.0019874
499	CC1=CC=C(S(N2CCC(C(O)=O)CC2)(=O)=O)C=C1	CC[Se][Se]CC	NC(C1=CN(CC2=CC=CC=C2)C=CC1)=O	CS(C)=O	CC1=CC=C(S(N2CCC([Se]CC)CC2)(=O)=O)C=C1	0.321125
500	CC1=CC=C(S(N2CCC(C(O)=O)CC2)(=O)=O)C=C1	CC[Se][Se]CC	NC(C1=CN(CC2=CC=C(OC)C=C2)C=CC1)=O	CS(C)=O	CC1=CC=C(S(N2CCC([Se]CC)CC2)(=O)=O)C=C1	0.377725
501	CC1=CC=C(S(N2CCC(C(O)=O)CC2)(=O)=O)C=C1	CC[Se][Se]CC	NC(C1=CN(CC2=CC=CC=C2)C=C(C(N)=O)C1C3=CC=CC=C3)=O	CS(C)=O	CC1=CC=C(S(N2CCC([Se]CC)CC2)(=O)=O)C=C1	0
502	O=C1C2=CC(CC(O)=O)=CC=C2OCC3=CC=CC=C13	CC[Se][Se]CC	NC(C1=CN(CC2=CC=C(C(F)(F)F)C=C2)C=CC1)=O	CS(C)=O	O=C1C2=CC(C[Se]CC)=CC=C2OCC3=CC=CC=C13	0
503	O=C1C2=CC(CC(O)=O)=CC=C2OCC3=CC=CC=C13	CC[Se][Se]CC	NC(C1=CN(CC2=CC=CC=C2)C=C(C(N)=O)C1)=O	CS(C)=O	O=C1C2=CC(C[Se]CC)=CC=C2OCC3=CC=CC=C13	0
504	O=C1C2=CC(CC(O)=O)=CC=C2OCC3=CC=CC=C13	CC[Se][Se]CC	NC(C1=CN(CC2=CC=CC=C2)C=C(C(N)=O)C1C3=CC=CC=C3)=O	CS(C)=O	O=C1C2=CC(C[Se]CC)=CC=C2OCC3=CC=CC=C13	0
505	CC(N1C(C2=CC=C(Cl)C=C2)=O)=C(CC(O)=O)C3=C1C=CC(OC)=C3	CC[Se][Se]CC	NC(C1=CN(CC2=CC=C(C(F)(F)F)C=C2)C=CC1)=O	CS(C)=O	CC(N1C(C2=CC=C(Cl)C=C2)=O)=C(C[Se]CC)C3=C1C=CC(OC)=C3	0.148094
506	CC(N(C(C1=C2C=CC=C1)=O)C2=O)C(O)=O	CC[Se][Se]CC	NC(C1=CN(CC2=CC=CC=C2)C=C(C(N)=O)C1)=O	[H]C(N(C)C)=O	CC(N(C(C1=C2C=CC=C1)=O)C2=O)[Se]CC	0
507	CC(N(C(C1=C2C=CC=C1)=O)C2=O)C(O)=O	CC[Se][Se]CC	NC(C1=CN(CC2=CC=CC=C2)C=C(C(N)=O)C1C3=CC=CC=C3)=O	[H]C(N(C)C)=O	CC(N(C(C1=C2C=CC=C1)=O)C2=O)[Se]CC	0
508	CC1=CC=C(S(N2CCC(C(O)=O)CC2)(=O)=O)C=C1	CC[Se][Se]CC	NC(C1=CN(CC2=CC=C(OC)C=C2)C=CC1)=O	[H]C(N(C)C)=O	CC1=CC=C(S(N2CCC([Se]CC)CC2)(=O)=O)C=C1	0
509	CC1=CC=C(S(N2CCC(C(O)=O)CC2)(=O)=O)C=C1	CC[Se][Se]CC	NC(C1=CN(CC2=CC=CC=C2)C=C(C(N)=O)C1)=O	[H]C(N(C)C)=O	CC1=CC=C(S(N2CCC([Se]CC)CC2)(=O)=O)C=C1	0
510	CC1=CC=C(S(N2CCC(C(O)=O)CC2)(=O)=O)C=C1	CC[Se][Se]CC	NC(C1=CN(CC2=CC=CC=C2)C=C(C(N)=O)C1C3=CC=CC=C3)=O	[H]C(N(C)C)=O	CC1=CC=C(S(N2CCC([Se]CC)CC2)(=O)=O)C=C1	0
511	O=C1C2=CC(CC(O)=O)=CC=C2OCC3=CC=CC=C13	CC[Se][Se]CC	NC(C1=CN(CC2=CC=C(OC)C=C2)C=CC1)=O	[H]C(N(C)C)=O	O=C1C2=CC(C[Se]CC)=CC=C2OCC3=CC=CC=C13	0
512	CC(C1=CC=C(CC2C(CCC2)=O)C=C1)C(O)=O	CC[Se][Se]CC	NC(C1=CN(CC2=CC=C(C(F)(F)F)C=C2)C=CC1)=O	[H]C(N(C)C)=O	CC(C1=CC=C(CC2C(CCC2)=O)C=C1)[Se]CC	0.011776
513	CC(N(C(C1=C2C=CC=C1)=O)C2=O)C(O)=O	CC[Se][Se]CC	NC(C1=CN(CC2=CC=C(C(F)(F)F)C=C2)C=CC1)=O	CC#N	CC(N(C(C1=C2C=CC=C1)=O)C2=O)[Se]CC	0
514	CC1=CC=C(S(N2CCC(C(O)=O)CC2)(=O)=O)C=C1	CC[Se][Se]CC	NC(C1=CN(CC2=CC=CC=C2)C=C(C(N)=O)C1)=O	CC#N	CC1=CC=C(S(N2CCC([Se]CC)CC2)(=O)=O)C=C1	0
515	O=C1C2=CC(CC(O)=O)=CC=C2OCC3=CC=CC=C13	CC[Se][Se]CC	NC(C1=CN(CC2=CC=C(C(F)(F)F)C=C2)C=CC1)=O	CC#N	O=C1C2=CC(C[Se]CC)=CC=C2OCC3=CC=CC=C13	0
516	CC(C1=CC=C(CC2C(CCC2)=O)C=C1)C(O)=O	CC[Se][Se]CC	NC(C1=CN(CC2=CC=CC=C2)C=CC1)=O	CC#N	CC(C1=CC=C(CC2C(CCC2)=O)C=C1)[Se]CC	0.025762
517	CC(C1=CC=C(CC2C(CCC2)=O)C=C1)C(O)=O	CC[Se][Se]CC	NC(C1=CN(CC2=CC=C(OC)C=C2)C=CC1)=O	CC#N	CC(C1=CC=C(CC2C(CCC2)=O)C=C1)[Se]CC	0.038749
518	CC(C1=CC=C(CC2C(CCC2)=O)C=C1)C(O)=O	CC[Se][Se]CC	NC(C1=CN(CC2=CC=CC=C2)C=C(C(N)=O)C1C3=CC=CC=C3)=O	CC#N	CC(C1=CC=C(CC2C(CCC2)=O)C=C1)[Se]CC	0.019768
519	CC1=CC=C(CC(O)=O)C=C1	CC[Se][Se]CC	NC(C1=CN(CC2=CC=C(C(F)(F)F)C=C2)C=CC1)=O	CS(C)=O	CC1=CC=C(C[Se]CC)C=C1	0.114986
520	BrC1=CC=C(CC(O)=O)C=C1	CC[Se][Se]CC	NC(C1=CN(CC2=CC=CC=C2)C=CC1)=O	CS(C)=O	BrC1=CC=C(C[Se]CC)C=C1	0.016918
521	BrC1=CC=C(CC(O)=O)C=C1	CC[Se][Se]CC	NC(C1=CN(CC2=CC=CC=C2)C=C(C(N)=O)C1)=O	CS(C)=O	BrC1=CC=C(C[Se]CC)C=C1	0
522	CC1=C(CC(O)=O)C=CC=C1	CC[Se][Se]CC	NC(C1=CN(CC2=CC=C(C(F)(F)F)C=C2)C=CC1)=O	CS(C)=O	CC1=C(C[Se]CC)C=CC=C1	0.404702
523	CC1=CC=C(CC(O)=O)C=C1	CC[Se][Se]CC	NC(C1=CN(CC2=CC=CC=C2)C=C(C(N)=O)C1C3=CC=CC=C3)=O	[H]C(N(C)C)=O	CC1=CC=C(C[Se]CC)C=C1	0.022264
524	BrC1=CC=C(CC(O)=O)C=C1	CC[Se][Se]CC	NC(C1=CN(CC2=CC=CC=C2)C=CC1)=O	[H]C(N(C)C)=O	BrC1=CC=C(C[Se]CC)C=C1	0
525	BrC1=CC=C(CC(O)=O)C=C1	CC[Se][Se]CC	NC(C1=CN(CC2=CC=C(OC)C=C2)C=CC1)=O	[H]C(N(C)C)=O	BrC1=CC=C(C[Se]CC)C=C1	0
526	BrC1=CC=C(CC(O)=O)C=C1	CC[Se][Se]CC	NC(C1=CN(CC2=CC=CC=C2)C=C(C(N)=O)C1C3=CC=CC=C3)=O	[H]C(N(C)C)=O	BrC1=CC=C(C[Se]CC)C=C1	0
527	O=C(CC1=CNC2=C1C=CC=C2)O	CC[Se][Se]CC	NC(C1=CN(CC2=CC=CC=C2)C=C(C(N)=O)C1)=O	[H]C(N(C)C)=O	CC[Se]CC1=CNC2=C1C=CC=C2	0
528	CC1=CC=C(CC(O)=O)C=C1	CC[Se][Se]CC	NC(C1=CN(CC2=CC=CC=C2)C=CC1)=O	CC#N	CC1=CC=C(C[Se]CC)C=C1	0
529	CC1=CC=C(CC(O)=O)C=C1	CC[Se][Se]CC	NC(C1=CN(CC2=CC=C(OC)C=C2)C=CC1)=O	CC#N	CC1=CC=C(C[Se]CC)C=C1	0
530	BrC1=CC=C(CC(O)=O)C=C1	CC[Se][Se]CC	NC(C1=CN(CC2=CC=CC=C2)C=C(C(N)=O)C1)=O	CC#N	BrC1=CC=C(C[Se]CC)C=C1	0
531	COC1=CC=C(CC(O)=O)C=C1	CC[Se][Se]CC	NC(C1=CN(CC2=CC=C(OC)C=C2)C=CC1)=O	CC#N	COC1=CC=C(C[Se]CC)C=C1	0.110084
532	O=C(CC1=CNC2=C1C=CC=C2)O	CC[Se][Se]CC	NC(C1=CN(CC2=CC=CC=C2)C=C(C(N)=O)C1)=O	CC#N	CC[Se]CC1=CNC2=C1C=CC=C2	0

## Sheet: Data set B
Entry	Substrate_1	Substrate_2	Catalyst	Solvent	Product	Yield
1	O=C(C1CCCCC1)O	C1(C[Se][Se]CC2=CC=CC=C2)=CC=CC=C1	OC(C1=CN(CC2=CC=CC=C2)C=CC1)=O	CC#N	C1([Se]CC2=CC=CC=C2)CCCCC1	0
2	O=C1C2=CC(CC(O)=O)=CC=C2OCC3=CC=CC=C13	CC[Se][Se]CC	CC1=C(C(OCC)=O)CC(C(OCC)=O)=C(C)N1	[H]C(N(C)C)=O	O=C1C2=CC(C[Se]CC)=CC=C2OCC3=CC=CC=C13	0
3	O=C1C2=CC(CC(O)=O)=CC=C2OCC3=CC=CC=C13	CC[Se][Se]CC	CC1=C(C(OCC)=O)CC(C(OCC)=O)=C(C)N1	CC#N	O=C1C2=CC(C[Se]CC)=CC=C2OCC3=CC=CC=C13	0
4	COC1=CC=C(CC(O)=O)C=C1	C1([Se][Se]C2=CC=CC=C2)=CC=CC=C1	OC(C1=CN(CC2=CC=CC=C2)C=CC1)=O	CS(C)=O	COC1=CC=C(C[Se]C2=CC=CC=C2)C=C1	0
5	CC1=CC=C(CC(O)=O)C=C1	CC[Se][Se]CC	CC1=C(C(OCC)=O)CC(C(OCC)=O)=C(C)N1	CC#N	CC1=CC=C(C[Se]CC)C=C1	0
6	CC1=CC=C(S(N2CCC(C(O)=O)CC2)(=O)=O)C=C1	CC[Se][Se]CC	CC1=C(C(OCC)=O)CC(C(OCC)=O)=C(C)N1	[H]C(N(C)C)=O	CC1=CC=C(S(N2CCC([Se]CC)CC2)(=O)=O)C=C1	0
7	CC1=CC=C(S(N2CCC(C(O)=O)CC2)(=O)=O)C=C1	CC[Se][Se]CC	CC1=C(C(OCC)=O)CC(C(OCC)=O)=C(C)N1	CC#N	CC1=CC=C(S(N2CCC([Se]CC)CC2)(=O)=O)C=C1	0
8	CC1=CC=C(S(N2CCC(C(O)=O)CC2)(=O)=O)C=C1	C1(C[Se][Se]CC2=CC=CC=C2)=CC=CC=C1	CC1=C(C(OCC)=O)CC(C(OCC)=O)=C(C)N1	CC#N	CC1=CC=C(S(N2CCC([Se]CC3=CC=CC=C3)CC2)(=O)=O)C=C1	0
9	BrC1=CC=C(CC(O)=O)C=C1	CC[Se][Se]CC	CC1=C(C(OCC)=O)CC(C(OCC)=O)=C(C)N1	[H]C(N(C)C)=O	BrC1=CC=C(C[Se]CC)C=C1	0
10	CC(N1C(C2=CC=C(Cl)C=C2)=O)=C(CC(O)=O)C3=C1C=CC(OC)=C3	CC[Se][Se]CC	CC1=C(C(OCC)=O)CC(C(OCC)=O)=C(C)N1	CC#N	CC(N1C(C2=CC=C(Cl)C=C2)=O)=C(C[Se]CC)C3=C1C=CC(OC)=C3	0
11	CC(C1=CC=C2C=C(OC)C=CC2=C1)C(O)=O	C1(C[Se][Se]CC2=CC=CC=C2)=CC=CC=C1	OC(C1=CN(CC2=CC=CC=C2)C=CC1)=O	CS(C)=O	CC(C1=CC=C2C=C(OC)C=CC2=C1)[Se]CC3=CC=CC=C3	0
12	BrC1=CC=C(CC(O)=O)C=C1	CC[Se][Se]CC	CC1=C(C(OCC)=O)CC(C(OCC)=O)=C(C)N1	CC#N	BrC1=CC=C(C[Se]CC)C=C1	0
13	O=C(C1(C2=CC=CC=C2)CC1)O	C1([Se][Se]C2=CC=CC=C2)=CC=CC=C1	N#CC1=CN(CC2=CC=CC=C2)C=CC1	CC#N	C1(C2([Se]C3=CC=CC=C3)CC2)=CC=CC=C1	0
14	CC(N1C(C2=CC=C(Cl)C=C2)=O)=C(CC(O)=O)C3=C1C=CC(OC)=C3	C1(C[Se][Se]CC2=CC=CC=C2)=CC=CC=C1	CC1=C(C(OCC)=O)CC(C(OCC)=O)=C(C)N1	CC#N	CC(N1C(C2=CC=C(Cl)C=C2)=O)=C(C[Se]CC3=CC=CC=C3)C4=C1C=CC(OC)=C4	0
15	CC1=C(CC(O)=O)C=CC=C1	C1([Se][Se]C2=CC=CC=C2)=CC=CC=C1	CC1=C(C(OCC)=O)CC(C(OCC)=O)=C(C)N1	CC#N	CC1=C(C[Se]C2=CC=CC=C2)C=CC=C1	0
16	CC1=C(CC(O)=O)C=CC=C1	CC[Se][Se]CC	CC1=C(C(OCC)=O)CC(C(OCC)=O)=C(C)N1	CC#N	CC1=C(C[Se]CC)C=CC=C1	0
17	CC(N1C(C2=CC=C(Cl)C=C2)=O)=C(CC(O)=O)C3=C1C=CC(OC)=C3	CC[Se][Se]CC	NC(C1=CN(CCCC)C=CC1)=O	CC#N	CC(N1C(C2=CC=C(Cl)C=C2)=O)=C(C[Se]CC)C3=C1C=CC(OC)=C3	0
18	CC1=CC=C(CC(O)=O)C=C1	CC[Se][Se]CC	NC(C1=CN(CCCC)C=CC1)=O	CC#N	CC1=CC=C(C[Se]CC)C=C1	0
19	CC1=C(CC(O)=O)C=CC=C1	CC[Se][Se]CC	OC(C1=CN(CC2=CC=CC=C2)C=CC1)=O	CC#N	CC1=C(C[Se]CC)C=CC=C1	0
20	BrC1=CC=C(CC(O)=O)C=C1	CC[Se][Se]CC	OC(C1=CN(CC2=CC=CC=C2)C=CC1)=O	CC#N	BrC1=CC=C(C[Se]CC)C=C1	0
21	O=C1C2=CC(CC(O)=O)=CC=C2OCC3=CC=CC=C13	CC[Se][Se]CC	OC(C1=CN(CC2=CC=CC=C2)C=CC1)=O	CC#N	O=C1C2=CC(C[Se]CC)=CC=C2OCC3=CC=CC=C13	0
22	COC1=CC=C(CC(O)=O)C=C1	C1([Se][Se]C2=CC=CC=C2)=CC=CC=C1	CC1=C(C(OCC)=O)CC(C(OCC)=O)=C(C)N1	CC#N	COC1=CC=C(C[Se]C2=CC=CC=C2)C=C1	0
23	CC1=CC=C(S(N2CCC(C(O)=O)CC2)(=O)=O)C=C1	CC[Se][Se]CC	NC(C1=CN(CCCC)C=CC1)=O	[H]C(N(C)C)=O	CC1=CC=C(S(N2CCC([Se]CC)CC2)(=O)=O)C=C1	0
24	CC1=CC=C(S(N2CCC(C(O)=O)CC2)(=O)=O)C=C1	CC[Se][Se]CC	OC(C1=CN(CC2=CC=CC=C2)C=CC1)=O	[H]C(N(C)C)=O	CC1=CC=C(S(N2CCC([Se]CC)CC2)(=O)=O)C=C1	0
25	O=C1C2=CC(CC(O)=O)=CC=C2OCC3=CC=CC=C13	CC[Se][Se]CC	NC(C1=CN(CCCC)C=CC1)=O	[H]C(N(C)C)=O	O=C1C2=CC(C[Se]CC)=CC=C2OCC3=CC=CC=C13	0
26	O=C1C2=CC(CC(O)=O)=CC=C2OCC3=CC=CC=C13	CC[Se][Se]CC	OC(C1=CN(CC2=CC=CC=C2)C=CC1)=O	[H]C(N(C)C)=O	O=C1C2=CC(C[Se]CC)=CC=C2OCC3=CC=CC=C13	0
27	O=C1C2=CC(CC(O)=O)=CC=C2OCC3=CC=CC=C13	CC[Se][Se]CC	NC(C1=CN(CCCC)C=CC1)=O	CC#N	O=C1C2=CC(C[Se]CC)=CC=C2OCC3=CC=CC=C13	0
28	CC(N1C(C2=CC=C(Cl)C=C2)=O)=C(CC(O)=O)C3=C1C=CC(OC)=C3	CC[Se][Se]CC	OC(C1=CN(CC2=CC=CC=C2)C=CC1)=O	CC#N	CC(N1C(C2=CC=C(Cl)C=C2)=O)=C(C[Se]CC)C3=C1C=CC(OC)=C3	0
29	BrC1=CC=C(CC(O)=O)C=C1	CC[Se][Se]CC	NC(C1=CN(CCCC)C=CC1)=O	[H]C(N(C)C)=O	BrC1=CC=C(C[Se]CC)C=C1	0
30	BrC1=CC=C(CC(O)=O)C=C1	CC[Se][Se]CC	OC(C1=CN(CC2=CC=CC=C2)C=CC1)=O	[H]C(N(C)C)=O	BrC1=CC=C(C[Se]CC)C=C1	0
31	CC1=CC=C(CC(O)=O)C=C1	CC[Se][Se]CC	OC(C1=CN(CC2=CC=CC=C2)C=CC1)=O	CC#N	CC1=CC=C(C[Se]CC)C=C1	0
32	BrC1=CC=C(CC(O)=O)C=C1	CC[Se][Se]CC	NC(C1=CN(CCCC)C=CC1)=O	CC#N	BrC1=CC=C(C[Se]CC)C=C1	0
33	CC1=CC=C(S(N2CCC(C(O)=O)CC2)(=O)=O)C=C1	C1(C[Se][Se]CC2=CC=CC=C2)=CC=CC=C1	OC(C1=CN(CC2=CC=CC=C2)C=CC1)=O	CC#N	CC1=CC=C(S(N2CCC([Se]CC3=CC=CC=C3)CC2)(=O)=O)C=C1	0
34	CC1=CC=C(S(N2CCC(C(O)=O)CC2)(=O)=O)C=C1	CC[Se][Se]CC	OC(C1=CN(CC2=CC=CC=C2)C=CC1)=O	CC#N	CC1=CC=C(S(N2CCC([Se]CC)CC2)(=O)=O)C=C1	0
35	O=C(C1CCCCC1)O	C1(C[Se][Se]CC2=CC=CC=C2)=CC=CC=C1	CC1=C(C(OCC)=O)CC(C(OCC)=O)=C(C)N1	CC#N	C1([Se]CC2=CC=CC=C2)CCCCC1	0
36	CC1=C(CC(O)=O)C=CC=C1	CC[Se][Se]CC	CC1=C(C(OCC)=O)CC(C(OCC)=O)=C(C)N1	[H]C(N(C)C)=O	CC1=C(C[Se]CC)C=CC=C1	0
37	O=C(OCC1=CC=CC=C1)[C@H](NC(OC(C)(C)C)=O)CC(O)=O	C1(C[Se][Se]CC2=CC=CC=C2)=CC=CC=C1	OC(C1=CN(CC2=CC=CC=C2)C=CC1)=O	[H]C(N(C)C)=O	O=C(OCC1=CC=CC=C1)[C@H](NC(OC(C)(C)C)=O)C[Se]CC2=CC=CC=C2	0
38	O=C(C1CCC1)O	C1(C[Se][Se]CC2=CC=CC=C2)=CC=CC=C1	CC1=C(C(OCC)=O)CC(C(OCC)=O)=C(C)N1	[H]C(N(C)C)=O	C1([Se]CC2=CC=CC=C2)CCC1	0
39	O=C(C1CCC1)O	C1(C[Se][Se]CC2=CC=CC=C2)=CC=CC=C1	OC(C1=CN(CC2=CC=CC=C2)C=CC1)=O	[H]C(N(C)C)=O	C1([Se]CC2=CC=CC=C2)CCC1	0
40	CC(C1=CC=C(CC2C(CCC2)=O)C=C1)C(O)=O	C1(C[Se][Se]CC2=CC=CC=C2)=CC=CC=C1	OC(C1=CN(CC2=CC=CC=C2)C=CC1)=O	CC#N	CC(C1=CC=C(CC2C(CCC2)=O)C=C1)[Se]CC3=CC=CC=C3	0
41	CC(N1C(C2=CC=C(Cl)C=C2)=O)=C(CC(O)=O)C3=C1C=CC(OC)=C3	C1(C[Se][Se]CC2=CC=CC=C2)=CC=CC=C1	CC1=C(C(OCC)=O)CC(C(OCC)=O)=C(C)N1	[H]C(N(C)C)=O	CC(N1C(C2=CC=C(Cl)C=C2)=O)=C(C[Se]CC3=CC=CC=C3)C4=C1C=CC(OC)=C4	0
42	O=C1C2=CC(CC(O)=O)=CC=C2OCC3=CC=CC=C13	CC[Se][Se]CC	NC(C1=CN(CCCC)C=CC1)=O	CS(C)=O	O=C1C2=CC(C[Se]CC)=CC=C2OCC3=CC=CC=C13	0
43	O=C1C2=CC(CC(O)=O)=CC=C2OCC3=CC=CC=C13	CC[Se][Se]CC	OC(C1=CN(CC2=CC=CC=C2)C=CC1)=O	CS(C)=O	O=C1C2=CC(C[Se]CC)=CC=C2OCC3=CC=CC=C13	0
44	O=C(C1CCCCC1)O	C1(C[Se][Se]CC2=CC=CC=C2)=CC=CC=C1	NC(C1=CN(CCCC)C=CC1)=O	CC#N	C1([Se]CC2=CC=CC=C2)CCCCC1	0
45	BrC1=CC=C(CC(O)=O)C=C1	CC[Se][Se]CC	OC(C1=CN(CC2=CC=CC=C2)C=CC1)=O	CS(C)=O	BrC1=CC=C(C[Se]CC)C=C1	0
46	CC1=C(CC(O)=O)C=CC=C1	CC[Se][Se]CC	OC(C1=CN(CC2=CC=CC=C2)C=CC1)=O	[H]C(N(C)C)=O	CC1=C(C[Se]CC)C=CC=C1	0
47	CC(N1C(C2=CC=C(Cl)C=C2)=O)=C(CC(O)=O)C3=C1C=CC(OC)=C3	C1(C[Se][Se]CC2=CC=CC=C2)=CC=CC=C1	NC(C1=CN(CCCC)C=CC1)=O	CC#N	CC(N1C(C2=CC=C(Cl)C=C2)=O)=C(C[Se]CC3=CC=CC=C3)C4=C1C=CC(OC)=C4	0
48	BrC1=CC=C(CC(O)=O)C=C1	CC[Se][Se]CC	CC1=C(C(OCC)=O)CC(C(OCC)=O)=C(C)N1	CS(C)=O	BrC1=CC=C(C[Se]CC)C=C1	0
49	CC(C1=CC=C(CC2C(CCC2)=O)C=C1)C(O)=O	C1(C[Se][Se]CC2=CC=CC=C2)=CC=CC=C1	CC1=C(C(OCC)=O)CC(C(OCC)=O)=C(C)N1	[H]C(N(C)C)=O	CC(C1=CC=C(CC2C(CCC2)=O)C=C1)[Se]CC3=CC=CC=C3	0
50	CC(N1C(C2=CC=C(Cl)C=C2)=O)=C(CC(O)=O)C3=C1C=CC(OC)=C3	C1(C[Se][Se]CC2=CC=CC=C2)=CC=CC=C1	OC(C1=CN(CC2=CC=CC=C2)C=CC1)=O	[H]C(N(C)C)=O	CC(N1C(C2=CC=C(Cl)C=C2)=O)=C(C[Se]CC3=CC=CC=C3)C4=C1C=CC(OC)=C4	0
51	O=C(CC1=CNC2=C1C=CC=C2)O	CC[Se][Se]CC	CC1=C(C(OCC)=O)CC(C(OCC)=O)=C(C)N1	[H]C(N(C)C)=O	CC[Se]CC1=CNC2=C1C=CC=C2	0
52	CC(C1=CC=C2C=C(OC)C=CC2=C1)C(O)=O	C1(C[Se][Se]CC2=CC=CC=C2)=CC=CC=C1	CC1=C(C(OCC)=O)CC(C(OCC)=O)=C(C)N1	CS(C)=O	CC(C1=CC=C2C=C(OC)C=CC2=C1)[Se]CC3=CC=CC=C3	0.01
53	O=C(CCC1=CC=CC=C1)O	C1([Se][Se]C2=CC=CC=C2)=CC=CC=C1	N#CC1=CN(CC2=CC=CC=C2)C=CC1	CC#N	C1(CC[Se]C2=CC=CC=C2)=CC=CC=C1	0.01
54	CC(C1=CC=C(CC2C(CCC2)=O)C=C1)C(O)=O	C1(C[Se][Se]CC2=CC=CC=C2)=CC=CC=C1	OC(C1=CN(CC2=CC=CC=C2)C=CC1)=O	[H]C(N(C)C)=O	CC(C1=CC=C(CC2C(CCC2)=O)C=C1)[Se]CC3=CC=CC=C3	0.01
55	O=C(C1CCCCC1)O	C1(C[Se][Se]CC2=CC=CC=C2)=CC=CC=C1	CC1=C(C(OCC)=O)CC(C(OCC)=O)=C(C)N1	[H]C(N(C)C)=O	C1([Se]CC2=CC=CC=C2)CCCCC1	0.01
56	CC(C1=CC=C(CC2C(CCC2)=O)C=C1)C(O)=O	C1(C[Se][Se]CC2=CC=CC=C2)=CC=CC=C1	CC1=C(C(OCC)=O)CC(C(OCC)=O)=C(C)N1	CC#N	CC(C1=CC=C(CC2C(CCC2)=O)C=C1)[Se]CC3=CC=CC=C3	0.01
57	CC(C1=CC=C2C=C(OC)C=CC2=C1)C(O)=O	C1(C[Se][Se]CC2=CC=CC=C2)=CC=CC=C1	CC1=C(C(OCC)=O)CC(C(OCC)=O)=C(C)N1	[H]C(N(C)C)=O	CC(C1=CC=C2C=C(OC)C=CC2=C1)[Se]CC3=CC=CC=C3	0.01
58	O=C(OCC1=CC=CC=C1)[C@H](NC(OC(C)(C)C)=O)CC(O)=O	C1(C[Se][Se]CC2=CC=CC=C2)=CC=CC=C1	CC1=C(C(OCC)=O)CC(C(OCC)=O)=C(C)N1	[H]C(N(C)C)=O	O=C(OCC1=CC=CC=C1)[C@H](NC(OC(C)(C)C)=O)C[Se]CC2=CC=CC=C2	0.01
59	O=C(CC1=CNC2=C1C=CC=C2)O	CC[Se][Se]CC	CC1=C(C(OCC)=O)CC(C(OCC)=O)=C(C)N1	CC#N	CC[Se]CC1=CNC2=C1C=CC=C2	0.01
60	O=C(C1CCCCC1)O	C1(C[Se][Se]CC2=CC=CC=C2)=CC=CC=C1	CC1=C(C(OCC)=O)CC(C(OCC)=O)=C(C)N1	CS(C)=O	C1([Se]CC2=CC=CC=C2)CCCCC1	0.01
61	CC1=CC=C(S(N2CCC(C(O)=O)CC2)(=O)=O)C=C1	CC[Se][Se]CC	NC(C1=CN(CCCC)C=CC1)=O	CC#N	CC1=CC=C(S(N2CCC([Se]CC)CC2)(=O)=O)C=C1	0.01
62	CC1=CC=C(S(N2CCC(C(O)=O)CC2)(=O)=O)C=C1	C1(C[Se][Se]CC2=CC=CC=C2)=CC=CC=C1	NC(C1=CN(CCCC)C=CC1)=O	CC#N	CC1=CC=C(S(N2CCC([Se]CC3=CC=CC=C3)CC2)(=O)=O)C=C1	0.01
63	CC(C1=CC=C2C=C(OC)C=CC2=C1)C(O)=O	C1([Se][Se]C2=CC=CC=C2)=CC=CC=C1	OC(C1=CN(CC2=CC=CC=C2)C=CC1)=O	CC#N	CC(C1=CC=C2C=C(OC)C=CC2=C1)[Se]C3=CC=CC=C3	0.01
64	O=C(OCC1=CC=CC=C1)[C@H](NC(OC(C)(C)C)=O)CC(O)=O	C1(C[Se][Se]CC2=CC=CC=C2)=CC=CC=C1	NC(C1=CN(CCCC)C=CC1)=O	[H]C(N(C)C)=O	O=C(OCC1=CC=CC=C1)[C@H](NC(OC(C)(C)C)=O)C[Se]CC2=CC=CC=C2	0.01
65	O=C(C1CCCCC1)O	C1(C[Se][Se]CC2=CC=CC=C2)=CC=CC=C1	OC(C1=CN(CC2=CC=CC=C2)C=CC1)=O	CS(C)=O	C1([Se]CC2=CC=CC=C2)CCCCC1	0.01
66	FC1(F)CCC(C(O)=O)CC1	C1([Se][Se]C2=CC=CC=C2)=CC=CC=C1	N#CC1=CN(CC2=CC=CC=C2)C=CC1	CC#N	FC1(F)CCC([Se]C2=CC=CC=C2)CC1	0.01
67	CC(C1=CC=C2C=C(OC)C=CC2=C1)C(O)=O	C1(C[Se][Se]CC2=CC=CC=C2)=CC=CC=C1	CC1=C(C(OCC)=O)CC(C(OCC)=O)=C(C)N1	CC#N	CC(C1=CC=C2C=C(OC)C=CC2=C1)[Se]CC3=CC=CC=C3	0.01
68	O=C(C1CCCCC1)O	C1(C[Se][Se]CC2=CC=CC=C2)=CC=CC=C1	OC(C1=CN(CC2=CC=CC=C2)C=CC1)=O	[H]C(N(C)C)=O	C1([Se]CC2=CC=CC=C2)CCCCC1	0.0101848
69	CC(C1=CC=C2C=C(OC)C=CC2=C1)C(O)=O	C1([Se][Se]C2=CC=CC=C2)=CC=CC=C1	CC1=C(C(OCC)=O)CC(C(OCC)=O)=C(C)N1	CC#N	CC(C1=CC=C2C=C(OC)C=CC2=C1)[Se]C3=CC=CC=C3	0.01081
70	CC(N1C(C2=CC=C(Cl)C=C2)=O)=C(CC(O)=O)C3=C1C=CC(OC)=C3	C1(C[Se][Se]CC2=CC=CC=C2)=CC=CC=C1	OC(C1=CN(CC2=CC=CC=C2)C=CC1)=O	CC#N	CC(N1C(C2=CC=C(Cl)C=C2)=O)=C(C[Se]CC3=CC=CC=C3)C4=C1C=CC(OC)=C4	0.0109239
71	O=C(N1CCC(C(O)=O)CC1)OCC2=CC=CC=C2	C1(C[Se][Se]CC2=CC=CC=C2)=CC=CC=C1	OC(C1=CN(CC2=CC=CC=C2)C=CC1)=O	CC#N	O=C(N1CCC([Se]CC2=CC=CC=C2)CC1)OCC3=CC=CC=C3	0.0113358
72	CC(C1=CC=C2C=C(OC)C=CC2=C1)C(O)=O	C1(C[Se][Se]CC2=CC=CC=C2)=CC=CC=C1	OC(C1=CN(CC2=CC=CC=C2)C=CC1)=O	CC#N	CC(C1=CC=C2C=C(OC)C=CC2=C1)[Se]CC3=CC=CC=C3	0.0118753
73	CC(C1=CC=C(CC2C(CCC2)=O)C=C1)C(O)=O	CC[Se][Se]CC	NC(C1=CN(CCCC)C=CC1)=O	[H]C(N(C)C)=O	CC(C1=CC=C(CC2C(CCC2)=O)C=C1)[Se]CC	0.0122755
74	O=C(C1CCC1)O	C1(C[Se][Se]CC2=CC=CC=C2)=CC=CC=C1	OC(C1=CN(CC2=CC=CC=C2)C=CC1)=O	CS(C)=O	C1([Se]CC2=CC=CC=C2)CCC1	0.0129503
75	O=C(C1CCC1)O	C1(C[Se][Se]CC2=CC=CC=C2)=CC=CC=C1	CC1=C(C(OCC)=O)CC(C(OCC)=O)=C(C)N1	CS(C)=O	C1([Se]CC2=CC=CC=C2)CCC1	0.0134822
76	O=C(OCC1=CC=CC=C1)[C@H](NC(OC(C)(C)C)=O)CC(O)=O	C1(C[Se][Se]CC2=CC=CC=C2)=CC=CC=C1	OC(C1=CN(CC2=CC=CC=C2)C=CC1)=O	CS(C)=O	O=C(OCC1=CC=CC=C1)[C@H](NC(OC(C)(C)C)=O)C[Se]CC2=CC=CC=C2	0.0136625
77	CC(C1=CC=C(CC2C(CCC2)=O)C=C1)C(O)=O	C1(C[Se][Se]CC2=CC=CC=C2)=CC=CC=C1	OC(C1=CN(CC2=CC=CC=C2)C=CC1)=O	CS(C)=O	CC(C1=CC=C(CC2C(CCC2)=O)C=C1)[Se]CC3=CC=CC=C3	0.0142851
78	O=C(CCCC1=CNC2=C1C=CC=C2)O	CC[Se][Se]CC	CC1=C(C(OCC)=O)CC(C(OCC)=O)=C(C)N1	CC#N	CC[Se]CCCC1=CNC2=C1C=CC=C2	0.015
79	CC1=C(CC(O)=O)C=CC=C1	C1([Se][Se]C2=CC=CC=C2)=CC=CC=C1	N#CC1=CN(CC2=CC=CC=C2)C=CC1	CC#N	CC1=C(C[Se]C2=CC=CC=C2)C=CC=C1	0.015
80	O=C(N1CCC(C(O)=O)CC1)OCC2=CC=CC=C2	C1(C[Se][Se]CC2=CC=CC=C2)=CC=CC=C1	CC1=C(C(OCC)=O)CC(C(OCC)=O)=C(C)N1	CS(C)=O	O=C(N1CCC([Se]CC2=CC=CC=C2)CC1)OCC3=CC=CC=C3	0.015294
81	O=C(N1CCC(C(O)=O)CC1)OCC2=CC=CC=C2	C1(C[Se][Se]CC2=CC=CC=C2)=CC=CC=C1	CC1=C(C(OCC)=O)CC(C(OCC)=O)=C(C)N1	[H]C(N(C)C)=O	O=C(N1CCC([Se]CC2=CC=CC=C2)CC1)OCC3=CC=CC=C3	0.0159537
82	O=C(N1CCC(C(O)=O)CC1)OCC2=CC=CC=C2	C1(C[Se][Se]CC2=CC=CC=C2)=CC=CC=C1	OC(C1=CN(CC2=CC=CC=C2)C=CC1)=O	CS(C)=O	O=C(N1CCC([Se]CC2=CC=CC=C2)CC1)OCC3=CC=CC=C3	0.0159537
83	O=C(C1CCC1)O	C1(C[Se][Se]CC2=CC=CC=C2)=CC=CC=C1	OC(C1=CN(CC2=CC=CC=C2)C=CC1)=O	CC#N	C1([Se]CC2=CC=CC=C2)CCC1	0.0172051
84	O=C(C1CCC1)O	C1(C[Se][Se]CC2=CC=CC=C2)=CC=CC=C1	CC1=C(C(OCC)=O)CC(C(OCC)=O)=C(C)N1	CC#N	C1([Se]CC2=CC=CC=C2)CCC1	0.0172051
85	O=C(N1CCC(C(O)=O)CC1)OCC2=CC=CC=C2	C1(C[Se][Se]CC2=CC=CC=C2)=CC=CC=C1	CC1=C(C(OCC)=O)CC(C(OCC)=O)=C(C)N1	CC#N	O=C(N1CCC([Se]CC2=CC=CC=C2)CC1)OCC3=CC=CC=C3	0.0185925
86	CC(N1C(C2=CC=C(Cl)C=C2)=O)=C(CC(O)=O)C3=C1C=CC(OC)=C3	C1(C[Se][Se]CC2=CC=CC=C2)=CC=CC=C1	NC(C1=CN(CCCC)C=CC1)=O	[H]C(N(C)C)=O	CC(N1C(C2=CC=C(Cl)C=C2)=O)=C(C[Se]CC3=CC=CC=C3)C4=C1C=CC(OC)=C4	0.0201672
87	CC(C1=CC=C(CC2C(CCC2)=O)C=C1)C(O)=O	CC[Se][Se]CC	CC1=C(C(OCC)=O)CC(C(OCC)=O)=C(C)N1	CC#N	CC(C1=CC=C(CC2C(CCC2)=O)C=C1)[Se]CC	0.021766
88	CC(C1=CC=C(CC2C(CCC2)=O)C=C1)C(O)=O	CC[Se][Se]CC	OC(C1=CN(CC2=CC=CC=C2)C=CC1)=O	CC#N	CC(C1=CC=C(CC2C(CCC2)=O)C=C1)[Se]CC	0.0222655
89	CC(N1C(C2=CC=C(Cl)C=C2)=O)=C(CC(O)=O)C3=C1C=CC(OC)=C3	CC[Se][Se]CC	NC(C1=CN(CCCC)C=CC1)=O	[H]C(N(C)C)=O	CC(N1C(C2=CC=C(Cl)C=C2)=O)=C(C[Se]CC)C3=C1C=CC(OC)=C3	0.023
90	CC1=C(CC(O)=O)C=CC=C1	CC[Se][Se]CC	NC(C1=CN(CCCC)C=CC1)=O	[H]C(N(C)C)=O	CC1=C(C[Se]CC)C=CC=C1	0.025203
91	O=C(CC1=CNC2=C1C=CC=C2)O	CC[Se][Se]CC	OC(C1=CN(CC2=CC=CC=C2)C=CC1)=O	[H]C(N(C)C)=O	CC[Se]CC1=CNC2=C1C=CC=C2	0.027125
92	CC1=CC=C(CC(O)=O)C=C1	C1([Se][Se]C2=CC=CC=C2)=CC=CC=C1	CC1=C(C(OCC)=O)CC(C(OCC)=O)=C(C)N1	CC#N	CC1=CC=C(C[Se]C2=CC=CC=C2)C=C1	0.0271607
93	CC(C1=CC=C2C=C(OC)C=CC2=C1)C(O)=O	C1(C[Se][Se]CC2=CC=CC=C2)=CC=CC=C1	OC(C1=CN(CC2=CC=CC=C2)C=CC1)=O	[H]C(N(C)C)=O	CC(C1=CC=C2C=C(OC)C=CC2=C1)[Se]CC3=CC=CC=C3	0.0273625
94	O=C(CCCC1=CNC2=C1C=CC=C2)O	C1(C[Se][Se]CC2=CC=CC=C2)=CC=CC=C1	OC(C1=CN(CC2=CC=CC=C2)C=CC1)=O	CC#N	C1(CCC[Se]CC2=CC=CC=C2)=CNC3=C1C=CC=C3	0.0285927
95	O=C(CCCC1=CNC2=C1C=CC=C2)O	CC[Se][Se]CC	OC(C1=CN(CC2=CC=CC=C2)C=CC1)=O	CC#N	CC[Se]CCCC1=CNC2=C1C=CC=C2	0.0285927
96	COC1=CC=C(CC(O)=O)C=C1	C1([Se][Se]C2=CC=CC=C2)=CC=CC=C1	N#CC1=CN(CC2=CC=CC=C2)C=CC1	CC#N	COC1=CC=C(C[Se]C2=CC=CC=C2)C=C1	0.03
97	O=C(N1CCC(C(O)=O)CC1)OCC2=CC=CC=C2	C1(C[Se][Se]CC2=CC=CC=C2)=CC=CC=C1	OC(C1=CN(CC2=CC=CC=C2)C=CC1)=O	[H]C(N(C)C)=O	O=C(N1CCC([Se]CC2=CC=CC=C2)CC1)OCC3=CC=CC=C3	0.0304671
98	O=C(CCC1=CC=CC=C1)O	C1([Se][Se]C2=CC=CC=C2)=CC=CC=C1	CC1=C(C(OCC)=O)CC(C(OCC)=O)=C(C)N1	[H]C(N(C)C)=O	C1(CC[Se]C2=CC=CC=C2)=CC=CC=C1	0.0322799
99	O=C(OCC1=CC=CC=C1)[C@H](NC(OC(C)(C)C)=O)CC(O)=O	C1(C[Se][Se]CC2=CC=CC=C2)=CC=CC=C1	OC(C1=CN(CC2=CC=CC=C2)C=CC1)=O	CC#N	O=C(OCC1=CC=CC=C1)[C@H](NC(OC(C)(C)C)=O)C[Se]CC2=CC=CC=C2	0.0323114
100	CC(C1=CC=C(CC2C(CCC2)=O)C=C1)C(O)=O	CC[Se][Se]CC	CC1=C(C(OCC)=O)CC(C(OCC)=O)=C(C)N1	[H]C(N(C)C)=O	CC(C1=CC=C(CC2C(CCC2)=O)C=C1)[Se]CC	0.0342535
101	CC(N1C(C2=CC=C(Cl)C=C2)=O)=C(CC(O)=O)C3=C1C=CC(OC)=C3	C1(C[Se][Se]CC2=CC=CC=C2)=CC=CC=C1	CC1=C(C(OCC)=O)CC(C(OCC)=O)=C(C)N1	CS(C)=O	CC(N1C(C2=CC=C(Cl)C=C2)=O)=C(C[Se]CC3=CC=CC=C3)C4=C1C=CC(OC)=C4	0.035
102	CC(N(C(C1=C2C=CC=C1)=O)C2=O)C(O)=O	C1([Se][Se]C2=CC=CC=C2)=CC=CC=C1	N#CC1=CN(CC2=CC=CC=C2)C=CC1	CC#N	CC(N(C(C1=C2C=CC=C1)=O)C2=O)[Se]C3=CC=CC=C3	0.035
103	O=C(C1CCC1)O	C1(C[Se][Se]CC2=CC=CC=C2)=CC=CC=C1	NC(C1=CN(CCCC)C=CC1)=O	[H]C(N(C)C)=O	C1([Se]CC2=CC=CC=C2)CCC1	0.0352272
104	O=C(C1CCC1)O	C1(C[Se][Se]CC2=CC=CC=C2)=CC=CC=C1	NC(C1=CN(CCCC)C=CC1)=O	CC#N	C1([Se]CC2=CC=CC=C2)CCC1	0.0358199
105	O=C(OCC1=CC=CC=C1)[C@H](NC(OC(C)(C)C)=O)CC(O)=O	C1(C[Se][Se]CC2=CC=CC=C2)=CC=CC=C1	CC1=C(C(OCC)=O)CC(C(OCC)=O)=C(C)N1	CC#N	O=C(OCC1=CC=CC=C1)[C@H](NC(OC(C)(C)C)=O)C[Se]CC2=CC=CC=C2	0.0362109
106	O=C(CCC1=CC=CC=C1)O	C1([Se][Se]C2=CC=CC=C2)=CC=CC=C1	CC1=C(C(OCC)=O)CC(C(OCC)=O)=C(C)N1	CC#N	C1(CC[Se]C2=CC=CC=C2)=CC=CC=C1	0.0375809
107	O=C(CCCC1=CNC2=C1C=CC=C2)O	CC[Se][Se]CC	NC(C1=CN(CCCC)C=CC1)=O	[H]C(N(C)C)=O	CC[Se]CCCC1=CNC2=C1C=CC=C2	0.0379145
108	CC(N1C(C2=CC=C(Cl)C=C2)=O)=C(CC(O)=O)C3=C1C=CC(OC)=C3	CC[Se][Se]CC	OC(C1=CN(CC2=CC=CC=C2)C=CC1)=O	[H]C(N(C)C)=O	CC(N1C(C2=CC=C(Cl)C=C2)=O)=C(C[Se]CC)C3=C1C=CC(OC)=C3	0.0382776
109	O=C(CCCC1=CNC2=C1C=CC=C2)O	C1(C[Se][Se]CC2=CC=CC=C2)=CC=CC=C1	CC1=C(C(OCC)=O)CC(C(OCC)=O)=C(C)N1	[H]C(N(C)C)=O	C1(CCC[Se]CC2=CC=CC=C2)=CNC3=C1C=CC=C3	0.0394167
110	O=C(C1CCC1)O	C1([Se][Se]C2=CC=CC=C2)=CC=CC=C1	N#CC1=CN(CC2=CC=CC=C2)C=CC1	CC#N	C1([Se]C2=CC=CC=C2)CCC1	0.04
111	CC(C1=CC=C(CC2C(CCC2)=O)C=C1)C(O)=O	CC[Se][Se]CC	NC(C1=CN(CCCC)C=CC1)=O	CC#N	CC(C1=CC=C(CC2C(CCC2)=O)C=C1)[Se]CC	0.0402475
112	BrC1=CC=C(CC(O)=O)C=C1	CC[Se][Se]CC	NC(C1=CN(CCCC)C=CC1)=O	CS(C)=O	BrC1=CC=C(C[Se]CC)C=C1	0.040757
113	O=C(N1CCC(C(O)=O)CC1)OCC2=CC=CC=C2	C1(C[Se][Se]CC2=CC=CC=C2)=CC=CC=C1	NC(C1=CN(CCCC)C=CC1)=O	CC#N	O=C(N1CCC([Se]CC2=CC=CC=C2)CC1)OCC3=CC=CC=C3	0.0423417
114	CC1=CC=C(CC(O)=O)C=C1	CC[Se][Se]CC	CC1=C(C(OCC)=O)CC(C(OCC)=O)=C(C)N1	CS(C)=O	CC1=CC=C(C[Se]CC)C=C1	0.0433072
115	O=C(C1CCCCC1)O	C1(C[Se][Se]CC2=CC=CC=C2)=CC=CC=C1	NC(C1=CN(CCCC)C=CC1)=O	[H]C(N(C)C)=O	C1([Se]CC2=CC=CC=C2)CCCCC1	0.0438584
116	O=C(CCCC1=CNC2=C1C=CC=C2)O	C1(C[Se][Se]CC2=CC=CC=C2)=CC=CC=C1	OC(C1=CN(CC2=CC=CC=C2)C=CC1)=O	CS(C)=O	C1(CCC[Se]CC2=CC=CC=C2)=CNC3=C1C=CC=C3	0.0439366
117	CC(N1C(C2=CC=C(Cl)C=C2)=O)=C(CC(O)=O)C3=C1C=CC(OC)=C3	C1(C[Se][Se]CC2=CC=CC=C2)=CC=CC=C1	OC(C1=CN(CC2=CC=CC=C2)C=CC1)=O	CS(C)=O	CC(N1C(C2=CC=C(Cl)C=C2)=O)=C(C[Se]CC3=CC=CC=C3)C4=C1C=CC(OC)=C4	0.0449875
118	COC1=CC=C(CC(O)=O)C=C1	CC[Se][Se]CC	CC1=C(C(OCC)=O)CC(C(OCC)=O)=C(C)N1	[H]C(N(C)C)=O	COC1=CC=C(C[Se]CC)C=C1	0.0457016
119	CC1=CC=C(CC(O)=O)C=C1	CC[Se][Se]CC	CC1=C(C(OCC)=O)CC(C(OCC)=O)=C(C)N1	[H]C(N(C)C)=O	CC1=CC=C(C[Se]CC)C=C1	0.0472528
120	O=C(OCC1=CC=CC=C1)[C@H](NC(OC(C)(C)C)=O)CC(O)=O	C1(C[Se][Se]CC2=CC=CC=C2)=CC=CC=C1	NC(C1=CN(CCCC)C=CC1)=O	CS(C)=O	O=C(OCC1=CC=CC=C1)[C@H](NC(OC(C)(C)C)=O)C[Se]CC2=CC=CC=C2	0.048092
121	COC1=CC=C(CC(O)=O)C=C1	CC[Se][Se]CC	CC1=C(C(OCC)=O)CC(C(OCC)=O)=C(C)N1	CC#N	COC1=CC=C(C[Se]CC)C=C1	0.0494888
122	O=C(CCCC1=CNC2=C1C=CC=C2)O	C1(C[Se][Se]CC2=CC=CC=C2)=CC=CC=C1	OC(C1=CN(CC2=CC=CC=C2)C=CC1)=O	[H]C(N(C)C)=O	C1(CCC[Se]CC2=CC=CC=C2)=CNC3=C1C=CC=C3	0.0497479
123	COC1=CC=C(CC(O)=O)C=C1	CC[Se][Se]CC	OC(C1=CN(CC2=CC=CC=C2)C=CC1)=O	CC#N	COC1=CC=C(C[Se]CC)C=C1	0.0507512
124	CC1=CC=C(S(N2CCC(C(O)=O)CC2)(=O)=O)C=C1	C1(C[Se][Se]CC2=CC=CC=C2)=CC=CC=C1	CC1=C(C(OCC)=O)CC(C(OCC)=O)=C(C)N1	[H]C(N(C)C)=O	CC1=CC=C(S(N2CCC([Se]CC3=CC=CC=C3)CC2)(=O)=O)C=C1	0.052324
125	COC1=CC=C(CC(O)=O)C=C1	CC[Se][Se]CC	NC(C1=CN(CCCC)C=CC1)=O	CC#N	COC1=CC=C(C[Se]CC)C=C1	0.0525848
126	O=C(N1CCC(C(O)=O)CC1)OCC2=CC=CC=C2	C1(C[Se][Se]CC2=CC=CC=C2)=CC=CC=C1	NC(C1=CN(CCCC)C=CC1)=O	[H]C(N(C)C)=O	O=C(N1CCC([Se]CC2=CC=CC=C2)CC1)OCC3=CC=CC=C3	0.054876
127	CC1=CC=C(S(N2CCC(C(O)=O)CC2)(=O)=O)C=C1	C1(C[Se][Se]CC2=CC=CC=C2)=CC=CC=C1	CC1=C(C(OCC)=O)CC(C(OCC)=O)=C(C)N1	CS(C)=O	CC1=CC=C(S(N2CCC([Se]CC3=CC=CC=C3)CC2)(=O)=O)C=C1	0.0557224
128	CC1=C(CC(O)=O)C=CC=C1	CC[Se][Se]CC	NC(C1=CN(CCCC)C=CC1)=O	CC#N	CC1=C(C[Se]CC)C=CC=C1	0.06
129	O=C(OCC1=CC=CC=C1)[C@H](NC(OC(C)(C)C)=O)CC(O)=O	C1(C[Se][Se]CC2=CC=CC=C2)=CC=CC=C1	NC(C1=CN(CCCC)C=CC1)=O	CC#N	O=C(OCC1=CC=CC=C1)[C@H](NC(OC(C)(C)C)=O)C[Se]CC2=CC=CC=C2	0.0610709
130	COC1=CC=C(CC(O)=O)C=C1	CC[Se][Se]CC	OC(C1=CN(CC2=CC=CC=C2)C=CC1)=O	[H]C(N(C)C)=O	COC1=CC=C(C[Se]CC)C=C1	0.0621128
131	O=C(CCC1=CC=CC=C1)O	C1([Se][Se]C2=CC=CC=C2)=CC=CC=C1	OC(C1=CN(CC2=CC=CC=C2)C=CC1)=O	[H]C(N(C)C)=O	C1(CC[Se]C2=CC=CC=C2)=CC=CC=C1	0.0640859
132	O=C(CC1=CNC2=C1C=CC=C2)O	CC[Se][Se]CC	NC(C1=CN(CCCC)C=CC1)=O	[H]C(N(C)C)=O	CC[Se]CC1=CNC2=C1C=CC=C2	0.067425
133	CC1=CC=C(S(N2CCC(C(O)=O)CC2)(=O)=O)C=C1	C1(C[Se][Se]CC2=CC=CC=C2)=CC=CC=C1	OC(C1=CN(CC2=CC=CC=C2)C=CC1)=O	CS(C)=O	CC1=CC=C(S(N2CCC([Se]CC3=CC=CC=C3)CC2)(=O)=O)C=C1	0.0676168
134	CC1=CC=C(S(N2CCC(C(O)=O)CC2)(=O)=O)C=C1	C1(C[Se][Se]CC2=CC=CC=C2)=CC=CC=C1	OC(C1=CN(CC2=CC=CC=C2)C=CC1)=O	[H]C(N(C)C)=O	CC1=CC=C(S(N2CCC([Se]CC3=CC=CC=C3)CC2)(=O)=O)C=C1	0.0676168
135	O=C(C1CCOCC1)O	C1([Se][Se]C2=CC=CC=C2)=CC=CC=C1	CC1=C(C(OCC)=O)CC(C(OCC)=O)=C(C)N1	CC#N	C1([Se]C2=CC=CC=C2)CCOCC1	0.068006
136	COC1=CC=C(CC(O)=O)C=C1	C1([Se][Se]C2=CC=CC=C2)=CC=CC=C1	CC1=C(C(OCC)=O)CC(C(OCC)=O)=C(C)N1	CS(C)=O	COC1=CC=C(C[Se]C2=CC=CC=C2)C=C1	0.0703924
137	O=C(CCCC1=CNC2=C1C=CC=C2)O	CC[Se][Se]CC	NC(C1=CN(CCCC)C=CC1)=O	CC#N	CC[Se]CCCC1=CNC2=C1C=CC=C2	0.0752021
138	O=C(CCCC1=CNC2=C1C=CC=C2)O	C1(C[Se][Se]CC2=CC=CC=C2)=CC=CC=C1	NC(C1=CN(CCCC)C=CC1)=O	CC#N	C1(CCC[Se]CC2=CC=CC=C2)=CNC3=C1C=CC=C3	0.0752021
139	FC1(F)CCC(C(O)=O)CC1	C1([Se][Se]C2=CC=CC=C2)=CC=CC=C1	N#CC1=CN(CC2=CC=CC=C2)C=CC1	CS(C)=O	FC1(F)CCC([Se]C2=CC=CC=C2)CC1	0.08
140	CC1=C(CC(O)=O)C=CC=C1	C1([Se][Se]C2=CC=CC=C2)=CC=CC=C1	CC1=C(C(OCC)=O)CC(C(OCC)=O)=C(C)N1	CS(C)=O	CC1=C(C[Se]C2=CC=CC=C2)C=CC=C1	0.083896
141	CC(N1C(C2=CC=C(Cl)C=C2)=O)=C(CC(O)=O)C3=C1C=CC(OC)=C3	CC[Se][Se]CC	CC1=C(C(OCC)=O)CC(C(OCC)=O)=C(C)N1	[H]C(N(C)C)=O	CC(N1C(C2=CC=C(Cl)C=C2)=O)=C(C[Se]CC)C3=C1C=CC(OC)=C3	0.0847398
142	CC(C1=CC=C2C=C(OC)C=CC2=C1)C(O)=O	C1(C[Se][Se]CC2=CC=CC=C2)=CC=CC=C1	NC(C1=CN(CCCC)C=CC1)=O	CC#N	CC(C1=CC=C2C=C(OC)C=CC2=C1)[Se]CC3=CC=CC=C3	0.0871934
143	O=C(C1CCCCC1)O	C1(C[Se][Se]CC2=CC=CC=C2)=CC=CC=C1	NC(C1=CN(CCCC)C=CC1)=O	CS(C)=O	C1([Se]CC2=CC=CC=C2)CCCCC1	0.0889216
144	FC1(F)CCC(C(O)=O)CC1	C1([Se][Se]C2=CC=CC=C2)=CC=CC=C1	CC1=C(C(OCC)=O)CC(C(OCC)=O)=C(C)N1	CC#N	FC1(F)CCC([Se]C2=CC=CC=C2)CC1	0.0899175
145	BrC1=CC=C(CC(O)=O)C=C1	C1([Se][Se]C2=CC=CC=C2)=CC=CC=C1	N#CC1=CN(CC2=CC=CC=C2)C=CC1	[H]C(N(C)C)=O	BrC1=CC=C(C[Se]C2=CC=CC=C2)C=C1	0.09
146	CC(C1=CC=C2C=C(OC)C=CC2=C1)C(O)=O	C1(C[Se][Se]CC2=CC=CC=C2)=CC=CC=C1	NC(C1=CN(CCCC)C=CC1)=O	[H]C(N(C)C)=O	CC(C1=CC=C2C=C(OC)C=CC2=C1)[Se]CC3=CC=CC=C3	0.0940275
147	COC1=CC=C(CC(O)=O)C=C1	CC[Se][Se]CC	NC(C1=CN(CCCC)C=CC1)=O	[H]C(N(C)C)=O	COC1=CC=C(C[Se]CC)C=C1	0.0955664
148	O=C(CC1=CNC2=C1C=CC=C2)O	CC[Se][Se]CC	OC(C1=CN(CC2=CC=CC=C2)C=CC1)=O	CC#N	CC[Se]CC1=CNC2=C1C=CC=C2	0.0969124
149	CC1=CC=C(CC(O)=O)C=C1	CC[Se][Se]CC	OC(C1=CN(CC2=CC=CC=C2)C=CC1)=O	[H]C(N(C)C)=O	CC1=CC=C(C[Se]CC)C=C1	0.101176
150	CC(C1=CC=C(CC2C(CCC2)=O)C=C1)C(O)=O	CC[Se][Se]CC	OC(C1=CN(CC2=CC=CC=C2)C=CC1)=O	[H]C(N(C)C)=O	CC(C1=CC=C(CC2C(CCC2)=O)C=C1)[Se]CC	0.103184
151	CC(C1=CC=C(CC2C(CCC2)=O)C=C1)C(O)=O	CC[Se][Se]CC	CC1=C(C(OCC)=O)CC(C(OCC)=O)=C(C)N1	CS(C)=O	CC(C1=CC=C(CC2C(CCC2)=O)C=C1)[Se]CC	0.103684
152	O=C(CCCC1=CNC2=C1C=CC=C2)O	CC[Se][Se]CC	OC(C1=CN(CC2=CC=CC=C2)C=CC1)=O	[H]C(N(C)C)=O	CC[Se]CCCC1=CNC2=C1C=CC=C2	0.105165
153	O=C(C1CCC1)O	C1(C[Se][Se]CC2=CC=CC=C2)=CC=CC=C1	NC(C1=CN(CCCC)C=CC1)=O	CS(C)=O	C1([Se]CC2=CC=CC=C2)CCC1	0.108683
154	CC(C1=CC=C2C=C(OC)C=CC2=C1)C(O)=O	C1(C[Se][Se]CC2=CC=CC=C2)=CC=CC=C1	NC(C1=CN(CCCC)C=CC1)=O	CS(C)=O	CC(C1=CC=C2C=C(OC)C=CC2=C1)[Se]CC3=CC=CC=C3	0.109841
155	O=C(N1CCC(C(O)=O)CC1)OCC2=CC=CC=C2	C1(C[Se][Se]CC2=CC=CC=C2)=CC=CC=C1	NC(C1=CN(CCCC)C=CC1)=O	CS(C)=O	O=C(N1CCC([Se]CC2=CC=CC=C2)CC1)OCC3=CC=CC=C3	0.115568
156	O=C(CCCC1=CNC2=C1C=CC=C2)O	CC[Se][Se]CC	CC1=C(C(OCC)=O)CC(C(OCC)=O)=C(C)N1	[H]C(N(C)C)=O	CC[Se]CCCC1=CNC2=C1C=CC=C2	0.117151
157	FC1(F)CCC(C(O)=O)CC1	C1([Se][Se]C2=CC=CC=C2)=CC=CC=C1	N#CC1=CN(CC2=CC=CC=C2)C=CC1	[H]C(N(C)C)=O	FC1(F)CCC([Se]C2=CC=CC=C2)CC1	0.12
158	CC1=CC=C(CC(O)=O)C=C1	CC[Se][Se]CC	NC(C1=CN(CCCC)C=CC1)=O	[H]C(N(C)C)=O	CC1=CC=C(C[Se]CC)C=C1	0.124192
159	FC1(F)CCC(C(O)=O)CC1	C1([Se][Se]C2=CC=CC=C2)=CC=CC=C1	NC(C1=CN(CCCC)C=CC1)=O	CC#N	FC1(F)CCC([Se]C2=CC=CC=C2)CC1	0.125
160	O=C(CCC1=CC=CC=C1)O	C1([Se][Se]C2=CC=CC=C2)=CC=CC=C1	NC(C1=CN(CCCC)C=CC1)=O	[H]C(N(C)C)=O	C1(CC[Se]C2=CC=CC=C2)=CC=CC=C1	0.125578
161	O=C(CCC1=CC=CC=C1)O	C1([Se][Se]C2=CC=CC=C2)=CC=CC=C1	OC(C1=CN(CC2=CC=CC=C2)C=CC1)=O	CC#N	C1(CC[Se]C2=CC=CC=C2)=CC=CC=C1	0.126005
162	CC1=CC=C(CC(O)=O)C=C1	CC[Se][Se]CC	OC(C1=CN(CC2=CC=CC=C2)C=CC1)=O	CS(C)=O	CC1=CC=C(C[Se]CC)C=C1	0.128138
163	O=C(C1(C2=CC=CC=C2)CC1)O	C1([Se][Se]C2=CC=CC=C2)=CC=CC=C1	CC1=C(C(OCC)=O)CC(C(OCC)=O)=C(C)N1	CC#N	C1(C2([Se]C3=CC=CC=C3)CC2)=CC=CC=C1	0.134734
164	COC1=CC=C(CC(O)=O)C=C1	CC[Se][Se]CC	CC1=C(C(OCC)=O)CC(C(OCC)=O)=C(C)N1	CS(C)=O	COC1=CC=C(C[Se]CC)C=C1	0.137382
165	CC1=CC=C(CC(O)=O)C=C1	C1([Se][Se]C2=CC=CC=C2)=CC=CC=C1	N#CC1=CN(CC2=CC=CC=C2)C=CC1	CC#N	CC1=CC=C(C[Se]C2=CC=CC=C2)C=C1	0.14
166	CC1=CC=C(S(N2CCC(C(O)=O)CC2)(=O)=O)C=C1	CC[Se][Se]CC	OC(C1=CN(CC2=CC=CC=C2)C=CC1)=O	CS(C)=O	CC1=CC=C(S(N2CCC([Se]CC)CC2)(=O)=O)C=C1	0.145149
167	CC(C1=CC=C(CC2C(CCC2)=O)C=C1)C(O)=O	C1(C[Se][Se]CC2=CC=CC=C2)=CC=CC=C1	NC(C1=CN(CCCC)C=CC1)=O	[H]C(N(C)C)=O	CC(C1=CC=C(CC2C(CCC2)=O)C=C1)[Se]CC3=CC=CC=C3	0.146764
168	O=C(CCCC1=CNC2=C1C=CC=C2)O	C1(C[Se][Se]CC2=CC=CC=C2)=CC=CC=C1	NC(C1=CN(CCCC)C=CC1)=O	[H]C(N(C)C)=O	C1(CCC[Se]CC2=CC=CC=C2)=CNC3=C1C=CC=C3	0.153706
169	CC(N1C(C2=CC=C(Cl)C=C2)=O)=C(CC(O)=O)C3=C1C=CC(OC)=C3	C1(C[Se][Se]CC2=CC=CC=C2)=CC=CC=C1	NC(C1=CN(CCCC)C=CC1)=O	CS(C)=O	CC(N1C(C2=CC=C(Cl)C=C2)=O)=C(C[Se]CC3=CC=CC=C3)C4=C1C=CC(OC)=C4	0.15736
170	CC(C1=CC=C2C=C(OC)C=CC2=C1)C(O)=O	C1([Se][Se]C2=CC=CC=C2)=CC=CC=C1	CC(C1=CN(CC2=CC=CC=C2)C=CC1)=O	CC#N	CC(C1=CC=C2C=C(OC)C=CC2=C1)[Se]C3=CC=CC=C3	0.16
171	CC1=CC=C(CC(O)=O)C=C1	C1([Se][Se]C2=CC=CC=C2)=CC=CC=C1	OC(C1=CN(CC2=CC=CC=C2)C=CC1)=O	CC#N	CC1=CC=C(C[Se]C2=CC=CC=C2)C=C1	0.16646
172	CC1=C(CC(O)=O)C=CC=C1	C1([Se][Se]C2=CC=CC=C2)=CC=CC=C1	OC(C1=CN(CC2=CC=CC=C2)C=CC1)=O	CS(C)=O	CC1=C(C[Se]C2=CC=CC=C2)C=CC=C1	0.167859
173	CC(N(C(C1=C2C=CC=C1)=O)C2=O)C(O)=O	C1(C[Se][Se]CC2=CC=CC=C2)=CC=CC=C1	CC1=C(C(OCC)=O)CC(C(OCC)=O)=C(C)N1	CS(C)=O	CC(N(C(C1=C2C=CC=C1)=O)C2=O)[Se]CC3=CC=CC=C3	0.174729
174	CC1=C(CC(O)=O)C=CC=C1	CC[Se][Se]CC	OC(C1=CN(CC2=CC=CC=C2)C=CC1)=O	CS(C)=O	CC1=C(C[Se]CC)C=CC=C1	0.17625
175	CC1=CC=C(S(N2CCC(C(O)=O)CC2)(=O)=O)C=C1	C1(C[Se][Se]CC2=CC=CC=C2)=CC=CC=C1	NC(C1=CN(CCCC)C=CC1)=O	[H]C(N(C)C)=O	CC1=CC=C(S(N2CCC([Se]CC3=CC=CC=C3)CC2)(=O)=O)C=C1	0.178631
176	CC(N(C(C1=C2C=CC=C1)=O)C2=O)C(O)=O	C1(C[Se][Se]CC2=CC=CC=C2)=CC=CC=C1	OC(C1=CN(CC2=CC=CC=C2)C=CC1)=O	[H]C(N(C)C)=O	CC(N(C(C1=C2C=CC=C1)=O)C2=O)[Se]CC3=CC=CC=C3	0.180469
177	COC1=CC=C(CC(O)=O)C=C1	C1([Se][Se]C2=CC=CC=C2)=CC=CC=C1	OC(C1=CN(CC2=CC=CC=C2)C=CC1)=O	CC#N	COC1=CC=C(C[Se]C2=CC=CC=C2)C=C1	0.180514
178	CC(N1C(C2=CC=C(Cl)C=C2)=O)=C(CC(O)=O)C3=C1C=CC(OC)=C3	CC[Se][Se]CC	NC(C1=CN(CCCC)C=CC1)=O	CS(C)=O	CC(N1C(C2=CC=C(Cl)C=C2)=O)=C(C[Se]CC)C3=C1C=CC(OC)=C3	0.180774
179	COC1=CC=C(CC(O)=O)C=C1	C1([Se][Se]C2=CC=CC=C2)=CC=CC=C1	NC(C1=CN(CCCC)C=CC1)=O	CS(C)=O	COC1=CC=C(C[Se]C2=CC=CC=C2)C=C1	0.181106
180	CC(N1C(C2=CC=C(Cl)C=C2)=O)=C(CC(O)=O)C3=C1C=CC(OC)=C3	CC[Se][Se]CC	OC(C1=CN(CC2=CC=CC=C2)C=CC1)=O	CS(C)=O	CC(N1C(C2=CC=C(Cl)C=C2)=O)=C(C[Se]CC)C3=C1C=CC(OC)=C3	0.181193
181	CC(N(C(C1=C2C=CC=C1)=O)C2=O)C(O)=O	C1(C[Se][Se]CC2=CC=CC=C2)=CC=CC=C1	CC1=C(C(OCC)=O)CC(C(OCC)=O)=C(C)N1	[H]C(N(C)C)=O	CC(N(C(C1=C2C=CC=C1)=O)C2=O)[Se]CC3=CC=CC=C3	0.183077
182	CC(C1=CC=C(CC2C(CCC2)=O)C=C1)C(O)=O	C1(C[Se][Se]CC2=CC=CC=C2)=CC=CC=C1	NC(C1=CN(CCCC)C=CC1)=O	CC#N	CC(C1=CC=C(CC2C(CCC2)=O)C=C1)[Se]CC3=CC=CC=C3	0.184213
183	O=C(C1CCC1)O	C1([Se][Se]C2=CC=CC=C2)=CC=CC=C1	CC1=C(C(OCC)=O)CC(C(OCC)=O)=C(C)N1	CC#N	C1([Se]C2=CC=CC=C2)CCC1	0.186226
184	FC1(F)CCC(C(O)=O)CC1	C1([Se][Se]C2=CC=CC=C2)=CC=CC=C1	CC1=C(C(OCC)=O)CC(C(OCC)=O)=C(C)N1	[H]C(N(C)C)=O	FC1(F)CCC([Se]C2=CC=CC=C2)CC1	0.187921
185	CC(N(C(C1=C2C=CC=C1)=O)C2=O)C(O)=O	C1(C[Se][Se]CC2=CC=CC=C2)=CC=CC=C1	OC(C1=CN(CC2=CC=CC=C2)C=CC1)=O	CS(C)=O	CC(N(C(C1=C2C=CC=C1)=O)C2=O)[Se]CC3=CC=CC=C3	0.191947
186	BrC1=CC=C(CC(O)=O)C=C1	C1([Se][Se]C2=CC=CC=C2)=CC=CC=C1	OC(C1=CN(CC2=CC=CC=C2)C=CC1)=O	CC#N	BrC1=CC=C(C[Se]C2=CC=CC=C2)C=C1	0.1932
187	O=C(C1(C2=CC=CC=C2)CC1)O	C1([Se][Se]C2=CC=CC=C2)=CC=CC=C1	OC(C1=CN(CC2=CC=CC=C2)C=CC1)=O	CC#N	C1(C2([Se]C3=CC=CC=C3)CC2)=CC=CC=C1	0.203714
188	O=C(C1CCOCC1)O	C1([Se][Se]C2=CC=CC=C2)=CC=CC=C1	OC(C1=CN(CC2=CC=CC=C2)C=CC1)=O	CC#N	C1([Se]C2=CC=CC=C2)CCOCC1	0.205
189	CC(N(C(C1=C2C=CC=C1)=O)C2=O)C(O)=O	C1(C[Se][Se]CC2=CC=CC=C2)=CC=CC=C1	OC(C1=CN(CC2=CC=CC=C2)C=CC1)=O	CC#N	CC(N(C(C1=C2C=CC=C1)=O)C2=O)[Se]CC3=CC=CC=C3	0.205512
190	CC(C1=CC=C(CC2C(CCC2)=O)C=C1)C(O)=O	C1(C[Se][Se]CC2=CC=CC=C2)=CC=CC=C1	NC(C1=CN(CCCC)C=CC1)=O	CS(C)=O	CC(C1=CC=C(CC2C(CCC2)=O)C=C1)[Se]CC3=CC=CC=C3	0.207554
191	BrC1=CC=C(CC(O)=O)C=C1	C1([Se][Se]C2=CC=CC=C2)=CC=CC=C1	OC(C1=CN(CC2=CC=CC=C2)C=CC1)=O	CS(C)=O	BrC1=CC=C(C[Se]C2=CC=CC=C2)C=C1	0.220892
192	BrC1=CC=C(CC(O)=O)C=C1	C1([Se][Se]C2=CC=CC=C2)=CC=CC=C1	CC1=C(C(OCC)=O)CC(C(OCC)=O)=C(C)N1	CS(C)=O	BrC1=CC=C(C[Se]C2=CC=CC=C2)C=C1	0.222907
193	CC1=C(CC(O)=O)C=CC=C1	C1([Se][Se]C2=CC=CC=C2)=CC=CC=C1	OC(C1=CN(CC2=CC=CC=C2)C=CC1)=O	CC#N	CC1=C(C[Se]C2=CC=CC=C2)C=CC=C1	0.222991
194	FC1(F)CCC(C(O)=O)CC1	C1([Se][Se]C2=CC=CC=C2)=CC=CC=C1	OC(C1=CN(CC2=CC=CC=C2)C=CC1)=O	CC#N	FC1(F)CCC([Se]C2=CC=CC=C2)CC1	0.227924
195	O=C(CCCC1=CNC2=C1C=CC=C2)O	C1(C[Se][Se]CC2=CC=CC=C2)=CC=CC=C1	NC(C1=CN(CCCC)C=CC1)=O	CS(C)=O	C1(CCC[Se]CC2=CC=CC=C2)=CNC3=C1C=CC=C3	0.229252
196	CC1=CC=C(S(N2CCC(C(O)=O)CC2)(=O)=O)C=C1	C1(C[Se][Se]CC2=CC=CC=C2)=CC=CC=C1	NC(C1=CN(CCCC)C=CC1)=O	CS(C)=O	CC1=CC=C(S(N2CCC([Se]CC3=CC=CC=C3)CC2)(=O)=O)C=C1	0.234138
197	CC(N(C(C1=C2C=CC=C1)=O)C2=O)C(O)=O	C1(C[Se][Se]CC2=CC=CC=C2)=CC=CC=C1	CC1=C(C(OCC)=O)CC(C(OCC)=O)=C(C)N1	CC#N	CC(N(C(C1=C2C=CC=C1)=O)C2=O)[Se]CC3=CC=CC=C3	0.235
198	FC1(F)CCC(C(O)=O)CC1	C1([Se][Se]C2=CC=CC=C2)=CC=CC=C1	CC1=C(C(OCC)=O)CC(C(OCC)=O)=C(C)N1	CS(C)=O	FC1(F)CCC([Se]C2=CC=CC=C2)CC1	0.235054
199	CC(C1=CC=C(CC2C(CCC2)=O)C=C1)C(O)=O	CC[Se][Se]CC	OC(C1=CN(CC2=CC=CC=C2)C=CC1)=O	CS(C)=O	CC(C1=CC=C(CC2C(CCC2)=O)C=C1)[Se]CC	0.235279
200	FC1(F)CCC(C(O)=O)CC1	C1([Se][Se]C2=CC=CC=C2)=CC=CC=C1	OC(C1=CN(CC2=CC=CC=C2)C=CC1)=O	[H]C(N(C)C)=O	FC1(F)CCC([Se]C2=CC=CC=C2)CC1	0.249822
201	COC1=CC=C(CC(O)=O)C=C1	CC[Se][Se]CC	OC(C1=CN(CC2=CC=CC=C2)C=CC1)=O	CS(C)=O	COC1=CC=C(C[Se]CC)C=C1	0.254154
202	FC1(F)CCC(C(O)=O)CC1	C1([Se][Se]C2=CC=CC=C2)=CC=CC=C1	OC(C1=CN(CC2=CC=CC=C2)C=CC1)=O	CS(C)=O	FC1(F)CCC([Se]C2=CC=CC=C2)CC1	0.256442
203	FC1(F)CCC(C(O)=O)CC1	C1([Se][Se]C2=CC=CC=C2)=CC=CC=C1	NC(C1=CN(CCCC)C=CC1)=O	[H]C(N(C)C)=O	FC1(F)CCC([Se]C2=CC=CC=C2)CC1	0.262553
204	FC1(F)CCC(C(O)=O)CC1	C1([Se][Se]C2=CC=CC=C2)=CC=CC=C1	NC(C1=CN(CCCC)C=CC1)=O	CS(C)=O	FC1(F)CCC([Se]C2=CC=CC=C2)CC1	0.26459
205	O=C1C2=CC(CC(O)=O)=CC=C2OCC3=CC=CC=C13	C1(C[Se][Se]CC2=CC=CC=C2)=CC=CC=C1	CC1=C(C(OCC)=O)CC(C(OCC)=O)=C(C)N1	[H]C(N(C)C)=O	O=C1C2=CC(C[Se]CC3=CC=CC=C3)=CC=C2OCC4=CC=CC=C14	0.271485
206	O=C1C2=CC(CC(O)=O)=CC=C2OCC3=CC=CC=C13	C1(C[Se][Se]CC2=CC=CC=C2)=CC=CC=C1	OC(C1=CN(CC2=CC=CC=C2)C=CC1)=O	[H]C(N(C)C)=O	O=C1C2=CC(C[Se]CC3=CC=CC=C3)=CC=C2OCC4=CC=CC=C14	0.271997
207	O=C1C2=CC(CC(O)=O)=CC=C2OCC3=CC=CC=C13	C1(C[Se][Se]CC2=CC=CC=C2)=CC=CC=C1	CC1=C(C(OCC)=O)CC(C(OCC)=O)=C(C)N1	CS(C)=O	O=C1C2=CC(C[Se]CC3=CC=CC=C3)=CC=C2OCC4=CC=CC=C14	0.273023
208	O=C(CCC1=CC=CC=C1)O	C1([Se][Se]C2=CC=CC=C2)=CC=CC=C1	CC(C1=CN(CC2=CC=CC=C2)C=CC1)=O	CC#N	C1(CC[Se]C2=CC=CC=C2)=CC=CC=C1	0.275
209	O=C1C2=CC(CC(O)=O)=CC=C2OCC3=CC=CC=C13	C1(C[Se][Se]CC2=CC=CC=C2)=CC=CC=C1	OC(C1=CN(CC2=CC=CC=C2)C=CC1)=O	CS(C)=O	O=C1C2=CC(C[Se]CC3=CC=CC=C3)=CC=C2OCC4=CC=CC=C14	0.278661
210	CC(C1=CC=C(CC2C(CCC2)=O)C=C1)C(O)=O	C1([Se][Se]C2=CC=CC=C2)=CC=CC=C1	CC1=C(C(OCC)=O)CC(C(OCC)=O)=C(C)N1	[H]C(N(C)C)=O	CC(C1=CC=C(CC2C(CCC2)=O)C=C1)[Se]C3=CC=CC=C3	0.27928
211	CC1=CC=C(S(N2CCC(C(O)=O)CC2)(=O)=O)C=C1	C1([Se][Se]C2=CC=CC=C2)=CC=CC=C1	CC1=C(C(OCC)=O)CC(C(OCC)=O)=C(C)N1	[H]C(N(C)C)=O	CC1=CC=C(S(N2CCC([Se]C3=CC=CC=C3)CC2)(=O)=O)C=C1	0.28105
212	CC1=CC=C(S(N2CCC(C(O)=O)CC2)(=O)=O)C=C1	C1([Se][Se]C2=CC=CC=C2)=CC=CC=C1	CC1=C(C(OCC)=O)CC(C(OCC)=O)=C(C)N1	CC#N	CC1=CC=C(S(N2CCC([Se]C3=CC=CC=C3)CC2)(=O)=O)C=C1	0.281568
213	CC(C1=CC=C(CC2C(CCC2)=O)C=C1)C(O)=O	C1([Se][Se]C2=CC=CC=C2)=CC=CC=C1	CC1=C(C(OCC)=O)CC(C(OCC)=O)=C(C)N1	CC#N	CC(C1=CC=C(CC2C(CCC2)=O)C=C1)[Se]C3=CC=CC=C3	0.285309
214	BrC1=CC=C(CC(O)=O)C=C1	C1([Se][Se]C2=CC=CC=C2)=CC=CC=C1	NC(C1=CN(CCCC)C=CC1)=O	CS(C)=O	BrC1=CC=C(C[Se]C2=CC=CC=C2)C=C1	0.29239
215	O=C(CCCC1=CNC2=C1C=CC=C2)O	CC[Se][Se]CC	OC(C1=CN(CC2=CC=CC=C2)C=CC1)=O	CS(C)=O	CC[Se]CCCC1=CNC2=C1C=CC=C2	0.297596
216	CC(N(C(C1=C2C=CC=C1)=O)C2=O)C(O)=O	C1(C[Se][Se]CC2=CC=CC=C2)=CC=CC=C1	NC(C1=CN(CCCC)C=CC1)=O	CC#N	CC(N(C(C1=C2C=CC=C1)=O)C2=O)[Se]CC3=CC=CC=C3	0.304645
217	O=C1C2=CC(CC(O)=O)=CC=C2OCC3=CC=CC=C13	C1(C[Se][Se]CC2=CC=CC=C2)=CC=CC=C1	NC(C1=CN(CCCC)C=CC1)=O	CS(C)=O	O=C1C2=CC(C[Se]CC3=CC=CC=C3)=CC=C2OCC4=CC=CC=C14	0.306854
218	O=C1C2=CC(CC(O)=O)=CC=C2OCC3=CC=CC=C13	C1(C[Se][Se]CC2=CC=CC=C2)=CC=CC=C1	NC(C1=CN(CCCC)C=CC1)=O	[H]C(N(C)C)=O	O=C1C2=CC(C[Se]CC3=CC=CC=C3)=CC=C2OCC4=CC=CC=C14	0.308392
219	BrC1=CC=C(CC(O)=O)C=C1	C1([Se][Se]C2=CC=CC=C2)=CC=CC=C1	NC(C1=CN(CCCC)C=CC1)=O	CC#N	BrC1=CC=C(C[Se]C2=CC=CC=C2)C=C1	0.309509
220	O=C(C1(C2=CC=CC=C2)CC1)O	C1([Se][Se]C2=CC=CC=C2)=CC=CC=C1	NC(C1=CN(CCCC)C=CC1)=O	CC#N	C1(C2([Se]C3=CC=CC=C3)CC2)=CC=CC=C1	0.31297
221	O=C(N1CCC(C(O)=O)CC1)OCC2=CC=CC=C2	C1([Se][Se]C2=CC=CC=C2)=CC=CC=C1	CC1=C(C(OCC)=O)CC(C(OCC)=O)=C(C)N1	CC#N	O=C(N1CCC([Se]C2=CC=CC=C2)CC1)OCC3=CC=CC=C3	0.31342
222	O=C1C2=CC(CC(O)=O)=CC=C2OCC3=CC=CC=C13	C1(C[Se][Se]CC2=CC=CC=C2)=CC=CC=C1	OC(C1=CN(CC2=CC=CC=C2)C=CC1)=O	CC#N	O=C1C2=CC(C[Se]CC3=CC=CC=C3)=CC=C2OCC4=CC=CC=C14	0.314652
223	CC1=CC=C(CC(O)=O)C=C1	CC[Se][Se]CC	NC(C1=CN(CCCC)C=CC1)=O	CS(C)=O	CC1=CC=C(C[Se]CC)C=C1	0.316211
224	CC1=C(CC(O)=O)C=CC=C1	C1([Se][Se]C2=CC=CC=C2)=CC=CC=C1	NC(C1=CN(CCCC)C=CC1)=O	CS(C)=O	CC1=C(C[Se]C2=CC=CC=C2)C=CC=C1	0.31707
225	CC(N(C(C1=C2C=CC=C1)=O)C2=O)C(O)=O	C1(C[Se][Se]CC2=CC=CC=C2)=CC=CC=C1	NC(C1=CN(CCCC)C=CC1)=O	CS(C)=O	CC(N(C(C1=C2C=CC=C1)=O)C2=O)[Se]CC3=CC=CC=C3	0.319776
226	O=C(OCC1=CC=CC=C1)[C@H](NC(OC(C)(C)C)=O)CC(O)=O	C1([Se][Se]C2=CC=CC=C2)=CC=CC=C1	CC1=C(C(OCC)=O)CC(C(OCC)=O)=C(C)N1	CC#N	O=C(OCC1=CC=CC=C1)[C@H](NC(OC(C)(C)C)=O)C[Se]C2=CC=CC=C2	0.322704
227	CC(C1=CC=C(CC2C(CCC2)=O)C=C1)C(O)=O	CC[Se][Se]CC	NC(C1=CN(CCCC)C=CC1)=O	CS(C)=O	CC(C1=CC=C(CC2C(CCC2)=O)C=C1)[Se]CC	0.331456
228	CC(N(C(C1=C2C=CC=C1)=O)C2=O)C(O)=O	C1(C[Se][Se]CC2=CC=CC=C2)=CC=CC=C1	NC(C1=CN(CCCC)C=CC1)=O	[H]C(N(C)C)=O	CC(N(C(C1=C2C=CC=C1)=O)C2=O)[Se]CC3=CC=CC=C3	0.333497
229	O=C(CC1=CNC2=C1C=CC=C2)O	CC[Se][Se]CC	NC(C1=CN(CCCC)C=CC1)=O	CC#N	CC[Se]CC1=CNC2=C1C=CC=C2	0.334421
230	O=C1C2=CC(CC(O)=O)=CC=C2OCC3=CC=CC=C13	C1(C[Se][Se]CC2=CC=CC=C2)=CC=CC=C1	CC1=C(C(OCC)=O)CC(C(OCC)=O)=C(C)N1	CC#N	O=C1C2=CC(C[Se]CC3=CC=CC=C3)=CC=C2OCC4=CC=CC=C14	0.336679
231	CC(N1C(C2=CC=C(Cl)C=C2)=O)=C(CC(O)=O)C3=C1C=CC(OC)=C3	C1([Se][Se]C2=CC=CC=C2)=CC=CC=C1	CC1=C(C(OCC)=O)CC(C(OCC)=O)=C(C)N1	CC#N	CC(N1C(C2=CC=C(Cl)C=C2)=O)=C(C[Se]C3=CC=CC=C3)C4=C1C=CC(OC)=C4	0.339131
232	CC1=CC=C(CC(O)=O)C=C1	C1([Se][Se]C2=CC=CC=C2)=CC=CC=C1	N#CC1=CN(CC2=CC=CC=C2)C=CC1	[H]C(N(C)C)=O	CC1=CC=C(C[Se]C2=CC=CC=C2)C=C1	0.34
233	O=C1C2=CC(CC(O)=O)=CC=C2OCC3=CC=CC=C13	C1([Se][Se]C2=CC=CC=C2)=CC=CC=C1	CC1=C(C(OCC)=O)CC(C(OCC)=O)=C(C)N1	[H]C(N(C)C)=O	O=C1C2=CC(C[Se]C3=CC=CC=C3)=CC=C2OCC4=CC=CC=C14	0.34
234	O=C(CCC1=CC=CC=C1)O	C1([Se][Se]C2=CC=CC=C2)=CC=CC=C1	NC(C1=CN(CCCC)C=CC1)=O	CC#N	C1(CC[Se]C2=CC=CC=C2)=CC=CC=C1	0.358822
235	CC1=CC=C(CC(O)=O)C=C1	C1([Se][Se]C2=CC=CC=C2)=CC=CC=C1	OC(C1=CN(CC2=CC=CC=C2)C=CC1)=O	[H]C(N(C)C)=O	CC1=CC=C(C[Se]C2=CC=CC=C2)C=C1	0.362746
236	CC1=C(CC(O)=O)C=CC=C1	C1([Se][Se]C2=CC=CC=C2)=CC=CC=C1	CC1=C(C(OCC)=O)CC(C(OCC)=O)=C(C)N1	[H]C(N(C)C)=O	CC1=C(C[Se]C2=CC=CC=C2)C=CC=C1	0.368156
237	COC1=CC=C(CC(O)=O)C=C1	CC[Se][Se]CC	NC(C1=CN(CCCC)C=CC1)=O	CS(C)=O	COC1=CC=C(C[Se]CC)C=C1	0.370926
238	CC1=CC=C(CC(O)=O)C=C1	C1([Se][Se]C2=CC=CC=C2)=CC=CC=C1	NC(C1=CN(CCCC)C=CC1)=O	CC#N	CC1=CC=C(C[Se]C2=CC=CC=C2)C=C1	0.37249
239	BrC1=CC=C(CC(O)=O)C=C1	C1([Se][Se]C2=CC=CC=C2)=CC=CC=C1	N#CC1=CN(CC2=CC=CC=C2)C=CC1	CC#N	BrC1=CC=C(C[Se]C2=CC=CC=C2)C=C1	0.375
240	CC(C1=CC=C2C=C(OC)C=CC2=C1)C(O)=O	C1([Se][Se]C2=CC=CC=C2)=CC=CC=C1	NC(C1=CN(CCCC)C=CC1)=O	CC#N	CC(C1=CC=C2C=C(OC)C=CC2=C1)[Se]C3=CC=CC=C3	0.400842
241	BrC1=CC=C(CC(O)=O)C=C1	C1([Se][Se]C2=CC=CC=C2)=CC=CC=C1	OC(C1=CN(CC2=CC=CC=C2)C=CC1)=O	[H]C(N(C)C)=O	BrC1=CC=C(C[Se]C2=CC=CC=C2)C=C1	0.401145
242	COC1=CC=C(CC(O)=O)C=C1	C1([Se][Se]C2=CC=CC=C2)=CC=CC=C1	CC1=C(C(OCC)=O)CC(C(OCC)=O)=C(C)N1	[H]C(N(C)C)=O	COC1=CC=C(C[Se]C2=CC=CC=C2)C=C1	0.42207
243	CC(C1=CC=C(CC2C(CCC2)=O)C=C1)C(O)=O	C1([Se][Se]C2=CC=CC=C2)=CC=CC=C1	OC(C1=CN(CC2=CC=CC=C2)C=CC1)=O	[H]C(N(C)C)=O	CC(C1=CC=C(CC2C(CCC2)=O)C=C1)[Se]C3=CC=CC=C3	0.423578
244	O=C1C2=CC(CC(O)=O)=CC=C2OCC3=CC=CC=C13	C1(C[Se][Se]CC2=CC=CC=C2)=CC=CC=C1	NC(C1=CN(CCCC)C=CC1)=O	CC#N	O=C1C2=CC(C[Se]CC3=CC=CC=C3)=CC=C2OCC4=CC=CC=C14	0.426047
245	CC1=CC=C(S(N2CCC(C(O)=O)CC2)(=O)=O)C=C1	CC[Se][Se]CC	NC(C1=CN(CCCC)C=CC1)=O	CS(C)=O	CC1=CC=C(S(N2CCC([Se]CC)CC2)(=O)=O)C=C1	0.435869
246	CC(N1C(C2=CC=C(Cl)C=C2)=O)=C(CC(O)=O)C3=C1C=CC(OC)=C3	C1([Se][Se]C2=CC=CC=C2)=CC=CC=C1	CC1=C(C(OCC)=O)CC(C(OCC)=O)=C(C)N1	[H]C(N(C)C)=O	CC(N1C(C2=CC=C(Cl)C=C2)=O)=C(C[Se]C3=CC=CC=C3)C4=C1C=CC(OC)=C4	0.43763
247	BrC1=CC=C(CC(O)=O)C=C1	C1([Se][Se]C2=CC=CC=C2)=CC=CC=C1	NC(C1=CN(CCCC)C=CC1)=O	[H]C(N(C)C)=O	BrC1=CC=C(C[Se]C2=CC=CC=C2)C=C1	0.441929
248	CC(C1=CC=C(CC2C(CCC2)=O)C=C1)C(O)=O	C1([Se][Se]C2=CC=CC=C2)=CC=CC=C1	CC1=C(C(OCC)=O)CC(C(OCC)=O)=C(C)N1	CS(C)=O	CC(C1=CC=C(CC2C(CCC2)=O)C=C1)[Se]C3=CC=CC=C3	0.444157
249	CC(N1C(C2=CC=C(Cl)C=C2)=O)=C(CC(O)=O)C3=C1C=CC(OC)=C3	C1([Se][Se]C2=CC=CC=C2)=CC=CC=C1	OC(C1=CN(CC2=CC=CC=C2)C=CC1)=O	CC#N	CC(N1C(C2=CC=C(Cl)C=C2)=O)=C(C[Se]C3=CC=CC=C3)C4=C1C=CC(OC)=C4	0.444324
250	CC1=CC=C(S(N2CCC(C(O)=O)CC2)(=O)=O)C=C1	C1([Se][Se]C2=CC=CC=C2)=CC=CC=C1	OC(C1=CN(CC2=CC=CC=C2)C=CC1)=O	[H]C(N(C)C)=O	CC1=CC=C(S(N2CCC([Se]C3=CC=CC=C3)CC2)(=O)=O)C=C1	0.454145
251	BrC1=CC=C(CC(O)=O)C=C1	C1([Se][Se]C2=CC=CC=C2)=CC=CC=C1	CC1=C(C(OCC)=O)CC(C(OCC)=O)=C(C)N1	CC#N	BrC1=CC=C(C[Se]C2=CC=CC=C2)C=C1	0.457537
252	O=C(CC1=CNC2=C1C=CC=C2)O	CC[Se][Se]CC	CC1=C(C(OCC)=O)CC(C(OCC)=O)=C(C)N1	CS(C)=O	CC[Se]CC1=CNC2=C1C=CC=C2	0.465641
253	O=C(CCCC1=CNC2=C1C=CC=C2)O	C1([Se][Se]C2=CC=CC=C2)=CC=CC=C1	CC1=C(C(OCC)=O)CC(C(OCC)=O)=C(C)N1	[H]C(N(C)C)=O	C1(CCC[Se]C2=CC=CC=C2)=CNC3=C1C=CC=C3	0.467628
254	O=C1C2=CC(CC(O)=O)=CC=C2OCC3=CC=CC=C13	C1([Se][Se]C2=CC=CC=C2)=CC=CC=C1	NC(C1=CN(CCCC)C=CC1)=O	[H]C(N(C)C)=O	O=C1C2=CC(C[Se]C3=CC=CC=C3)=CC=C2OCC4=CC=CC=C14	0.485
255	CC(C1=CC=C(CC2C(CCC2)=O)C=C1)C(O)=O	C1([Se][Se]C2=CC=CC=C2)=CC=CC=C1	OC(C1=CN(CC2=CC=CC=C2)C=CC1)=O	CC#N	CC(C1=CC=C(CC2C(CCC2)=O)C=C1)[Se]C3=CC=CC=C3	0.485
256	COC1=CC=C(CC(O)=O)C=C1	C1([Se][Se]C2=CC=CC=C2)=CC=CC=C1	NC(C1=CN(CCCC)C=CC1)=O	CC#N	COC1=CC=C(C[Se]C2=CC=CC=C2)C=C1	0.487788
257	O=C(CCCC1=CNC2=C1C=CC=C2)O	C1([Se][Se]C2=CC=CC=C2)=CC=CC=C1	CC1=C(C(OCC)=O)CC(C(OCC)=O)=C(C)N1	CC#N	C1(CCC[Se]C2=CC=CC=C2)=CNC3=C1C=CC=C3	0.494872
258	O=C(C1(C2=CC=CC=C2)CC1)O	C1([Se][Se]C2=CC=CC=C2)=CC=CC=C1	CC1=C(C(OCC)=O)CC(C(OCC)=O)=C(C)N1	CS(C)=O	C1(C2([Se]C3=CC=CC=C3)CC2)=CC=CC=C1	0.499139
259	CC(C1=CC=C(CC2C(CCC2)=O)C=C1)C(O)=O	C1([Se][Se]C2=CC=CC=C2)=CC=CC=C1	NC(C1=CN(CCCC)C=CC1)=O	[H]C(N(C)C)=O	CC(C1=CC=C(CC2C(CCC2)=O)C=C1)[Se]C3=CC=CC=C3	0.501911
260	O=C(OCC1=CC=CC=C1)[C@H](NC(OC(C)(C)C)=O)CC(O)=O	C1([Se][Se]C2=CC=CC=C2)=CC=CC=C1	OC(C1=CN(CC2=CC=CC=C2)C=CC1)=O	CC#N	O=C(OCC1=CC=CC=C1)[C@H](NC(OC(C)(C)C)=O)C[Se]C2=CC=CC=C2	0.517596
261	CC1=C(CC(O)=O)C=CC=C1	C1([Se][Se]C2=CC=CC=C2)=CC=CC=C1	NC(C1=CN(CCCC)C=CC1)=O	CC#N	CC1=C(C[Se]C2=CC=CC=C2)C=CC=C1	0.518994
262	O=C1C2=CC(CC(O)=O)=CC=C2OCC3=CC=CC=C13	C1([Se][Se]C2=CC=CC=C2)=CC=CC=C1	OC(C1=CN(CC2=CC=CC=C2)C=CC1)=O	CC#N	O=C1C2=CC(C[Se]C3=CC=CC=C3)=CC=C2OCC4=CC=CC=C14	0.520975
263	O=C1C2=CC(CC(O)=O)=CC=C2OCC3=CC=CC=C13	C1([Se][Se]C2=CC=CC=C2)=CC=CC=C1	CC1=C(C(OCC)=O)CC(C(OCC)=O)=C(C)N1	CC#N	O=C1C2=CC(C[Se]C3=CC=CC=C3)=CC=C2OCC4=CC=CC=C14	0.523814
264	O=C(C1CCC1)O	C1([Se][Se]C2=CC=CC=C2)=CC=CC=C1	NC(C1=CN(CCCC)C=CC1)=O	CC#N	C1([Se]C2=CC=CC=C2)CCC1	0.528489
265	CC1=CC=C(CC(O)=O)C=C1	C1([Se][Se]C2=CC=CC=C2)=CC=CC=C1	CC(C1=CN(CC2=CC=CC=C2)C=CC1)=O	[H]C(N(C)C)=O	CC1=CC=C(C[Se]C2=CC=CC=C2)C=C1	0.53
266	CC(C1=CC=C(CC2C(CCC2)=O)C=C1)C(O)=O	C1([Se][Se]C2=CC=CC=C2)=CC=CC=C1	N#CC1=CN(CC2=CC=CC=C2)C=CC1	[H]C(N(C)C)=O	CC(C1=CC=C(CC2C(CCC2)=O)C=C1)[Se]C3=CC=CC=C3	0.535
267	O=C(C1(C2=CC=CC=C2)CC1)O	C1([Se][Se]C2=CC=CC=C2)=CC=CC=C1	OC(C1=CN(CC2=CC=CC=C2)C=CC1)=O	CS(C)=O	C1(C2([Se]C3=CC=CC=C3)CC2)=CC=CC=C1	0.536973
268	CC(C1=CC=C2C=C(OC)C=CC2=C1)C(O)=O	C1([Se][Se]C2=CC=CC=C2)=CC=CC=C1	OC(C1=CN(CC2=CC=CC=C2)C=CC1)=O	CS(C)=O	CC(C1=CC=C2C=C(OC)C=CC2=C1)[Se]C3=CC=CC=C3	0.538917
269	CC(C1=CC=C2C=C(OC)C=CC2=C1)C(O)=O	C1([Se][Se]C2=CC=CC=C2)=CC=CC=C1	OC(C1=CN(CC2=CC=CC=C2)C=CC1)=O	[H]C(N(C)C)=O	CC(C1=CC=C2C=C(OC)C=CC2=C1)[Se]C3=CC=CC=C3	0.538917
270	O=C(CCCC1=CNC2=C1C=CC=C2)O	C1([Se][Se]C2=CC=CC=C2)=CC=CC=C1	OC(C1=CN(CC2=CC=CC=C2)C=CC1)=O	CC#N	C1(CCC[Se]C2=CC=CC=C2)=CNC3=C1C=CC=C3	0.542273
271	CC(C1=CC=C(CC2C(CCC2)=O)C=C1)C(O)=O	C1([Se][Se]C2=CC=CC=C2)=CC=CC=C1	OC(C1=CN(CC2=CC=CC=C2)C=CC1)=O	CS(C)=O	CC(C1=CC=C(CC2C(CCC2)=O)C=C1)[Se]C3=CC=CC=C3	0.549324
272	O=C1C2=CC(CC(O)=O)=CC=C2OCC3=CC=CC=C13	C1([Se][Se]C2=CC=CC=C2)=CC=CC=C1	NC(C1=CN(CCCC)C=CC1)=O	CC#N	O=C1C2=CC(C[Se]C3=CC=CC=C3)=CC=C2OCC4=CC=CC=C14	0.563086
273	CC1=CC=C(CC(O)=O)C=C1	C1([Se][Se]C2=CC=CC=C2)=CC=CC=C1	NC(C1=CN(CCCC)C=CC1)=O	[H]C(N(C)C)=O	CC1=CC=C(C[Se]C2=CC=CC=C2)C=C1	0.565824
274	CC(N1C(C2=CC=C(Cl)C=C2)=O)=C(CC(O)=O)C3=C1C=CC(OC)=C3	C1([Se][Se]C2=CC=CC=C2)=CC=CC=C1	OC(C1=CN(CC2=CC=CC=C2)C=CC1)=O	[H]C(N(C)C)=O	CC(N1C(C2=CC=C(Cl)C=C2)=O)=C(C[Se]C3=CC=CC=C3)C4=C1C=CC(OC)=C4	0.56673
275	CC(N1C(C2=CC=C(Cl)C=C2)=O)=C(CC(O)=O)C3=C1C=CC(OC)=C3	C1([Se][Se]C2=CC=CC=C2)=CC=CC=C1	NC(C1=CN(CCCC)C=CC1)=O	CC#N	CC(N1C(C2=CC=C(Cl)C=C2)=O)=C(C[Se]C3=CC=CC=C3)C4=C1C=CC(OC)=C4	0.569599
276	CC1=C(CC(O)=O)C=CC=C1	CC[Se][Se]CC	NC(C1=CN(CCCC)C=CC1)=O	CS(C)=O	CC1=C(C[Se]CC)C=CC=C1	0.573845
277	O=C(C1CCC1)O	C1([Se][Se]C2=CC=CC=C2)=CC=CC=C1	OC(C1=CN(CC2=CC=CC=C2)C=CC1)=O	[H]C(N(C)C)=O	C1([Se]C2=CC=CC=C2)CCC1	0.581119
278	O=C(C1CCC1)O	C1([Se][Se]C2=CC=CC=C2)=CC=CC=C1	OC(C1=CN(CC2=CC=CC=C2)C=CC1)=O	CS(C)=O	C1([Se]C2=CC=CC=C2)CCC1	0.581119
279	CC1=CC=C(CC(O)=O)C=C1	C1([Se][Se]C2=CC=CC=C2)=CC=CC=C1	N#CC1=CN(CC2=CC=CC=C2)C=CC1	CS(C)=O	CC1=CC=C(C[Se]C2=CC=CC=C2)C=C1	0.585
280	CC(C1=CC=C(CC2C(CCC2)=O)C=C1)C(O)=O	C1([Se][Se]C2=CC=CC=C2)=CC=CC=C1	NC(C1=CN(CCCC)C=CC1)=O	CC#N	CC(C1=CC=C(CC2C(CCC2)=O)C=C1)[Se]C3=CC=CC=C3	0.585398
281	O=C(C1CCC1)O	C1([Se][Se]C2=CC=CC=C2)=CC=CC=C1	NC(C1=CN(CCCC)C=CC1)=O	CS(C)=O	C1([Se]C2=CC=CC=C2)CCC1	0.6
282	CC(C1=CC=C2C=C(OC)C=CC2=C1)C(O)=O	C1([Se][Se]C2=CC=CC=C2)=CC=CC=C1	NC(C1=CN(CCCC)C=CC1)=O	CS(C)=O	CC(C1=CC=C2C=C(OC)C=CC2=C1)[Se]C3=CC=CC=C3	0.602129
283	CC(C1=CC=C2C=C(OC)C=CC2=C1)C(O)=O	C1([Se][Se]C2=CC=CC=C2)=CC=CC=C1	NC(C1=CN(CCCC)C=CC1)=O	[H]C(N(C)C)=O	CC(C1=CC=C2C=C(OC)C=CC2=C1)[Se]C3=CC=CC=C3	0.602129
284	CC1=CC=C(S(N2CCC(C(O)=O)CC2)(=O)=O)C=C1	C1([Se][Se]C2=CC=CC=C2)=CC=CC=C1	NC(C1=CN(CCCC)C=CC1)=O	[H]C(N(C)C)=O	CC1=CC=C(S(N2CCC([Se]C3=CC=CC=C3)CC2)(=O)=O)C=C1	0.604438
285	O=C(C1CCOCC1)O	C1([Se][Se]C2=CC=CC=C2)=CC=CC=C1	CC1=C(C(OCC)=O)CC(C(OCC)=O)=C(C)N1	[H]C(N(C)C)=O	C1([Se]C2=CC=CC=C2)CCOCC1	0.608802
286	COC1=CC=C(CC(O)=O)C=C1	C1([Se][Se]C2=CC=CC=C2)=CC=CC=C1	OC(C1=CN(CC2=CC=CC=C2)C=CC1)=O	[H]C(N(C)C)=O	COC1=CC=C(C[Se]C2=CC=CC=C2)C=C1	0.628104
287	O=C1C2=CC(CC(O)=O)=CC=C2OCC3=CC=CC=C13	C1([Se][Se]C2=CC=CC=C2)=CC=CC=C1	CC(C1=CN(CC2=CC=CC=C2)C=CC1)=O	[H]C(N(C)C)=O	O=C1C2=CC(C[Se]C3=CC=CC=C3)=CC=C2OCC4=CC=CC=C14	0.63
288	CC(N1C(C2=CC=C(Cl)C=C2)=O)=C(CC(O)=O)C3=C1C=CC(OC)=C3	C1([Se][Se]C2=CC=CC=C2)=CC=CC=C1	CC1=C(C(OCC)=O)CC(C(OCC)=O)=C(C)N1	CS(C)=O	CC(N1C(C2=CC=C(Cl)C=C2)=O)=C(C[Se]C3=CC=CC=C3)C4=C1C=CC(OC)=C4	0.630165
289	O=C(CC1=CNC2=C1C=CC=C2)O	CC[Se][Se]CC	OC(C1=CN(CC2=CC=CC=C2)C=CC1)=O	CS(C)=O	CC[Se]CC1=CNC2=C1C=CC=C2	0.641475
290	O=C(C1(C2=CC=CC=C2)CC1)O	C1([Se][Se]C2=CC=CC=C2)=CC=CC=C1	NC(C1=CN(CCCC)C=CC1)=O	CS(C)=O	C1(C2([Se]C3=CC=CC=C3)CC2)=CC=CC=C1	0.641803
291	CC1=C(CC(O)=O)C=CC=C1	C1([Se][Se]C2=CC=CC=C2)=CC=CC=C1	OC(C1=CN(CC2=CC=CC=C2)C=CC1)=O	[H]C(N(C)C)=O	CC1=C(C[Se]C2=CC=CC=C2)C=CC=C1	0.644828
292	O=C(N1CCC(C(O)=O)CC1)OCC2=CC=CC=C2	C1([Se][Se]C2=CC=CC=C2)=CC=CC=C1	N#CC1=CN(CC2=CC=CC=C2)C=CC1	[H]C(N(C)C)=O	O=C(N1CCC([Se]C2=CC=CC=C2)CC1)OCC3=CC=CC=C3	0.645
293	CC(N1C(C2=CC=C(Cl)C=C2)=O)=C(CC(O)=O)C3=C1C=CC(OC)=C3	C1([Se][Se]C2=CC=CC=C2)=CC=CC=C1	NC(C1=CN(CCCC)C=CC1)=O	[H]C(N(C)C)=O	CC(N1C(C2=CC=C(Cl)C=C2)=O)=C(C[Se]C3=CC=CC=C3)C4=C1C=CC(OC)=C4	0.646103
294	COC1=CC=C(CC(O)=O)C=C1	C1([Se][Se]C2=CC=CC=C2)=CC=CC=C1	NC(C1=CN(CCCC)C=CC1)=O	[H]C(N(C)C)=O	COC1=CC=C(C[Se]C2=CC=CC=C2)C=C1	0.66185
295	O=C(C1CCC1)O	C1([Se][Se]C2=CC=CC=C2)=CC=CC=C1	CC1=C(C(OCC)=O)CC(C(OCC)=O)=C(C)N1	CS(C)=O	C1([Se]C2=CC=CC=C2)CCC1	0.663711
296	O=C(C1CCC1)O	C1([Se][Se]C2=CC=CC=C2)=CC=CC=C1	CC1=C(C(OCC)=O)CC(C(OCC)=O)=C(C)N1	[H]C(N(C)C)=O	C1([Se]C2=CC=CC=C2)CCC1	0.663711
297	O=C(CCCC1=CNC2=C1C=CC=C2)O	CC[Se][Se]CC	NC(C1=CN(CCCC)C=CC1)=O	CS(C)=O	CC[Se]CCCC1=CNC2=C1C=CC=C2	0.667143
298	CC(C1=CC=C(CC2C(CCC2)=O)C=C1)C(O)=O	C1([Se][Se]C2=CC=CC=C2)=CC=CC=C1	NC(C1=CN(CCCC)C=CC1)=O	CS(C)=O	CC(C1=CC=C(CC2C(CCC2)=O)C=C1)[Se]C3=CC=CC=C3	0.671504
299	CC1=C(CC(O)=O)C=CC=C1	C1([Se][Se]C2=CC=CC=C2)=CC=CC=C1	NC(C1=CN(CCCC)C=CC1)=O	[H]C(N(C)C)=O	CC1=C(C[Se]C2=CC=CC=C2)C=CC=C1	0.690856
300	O=C(CCCC1=CNC2=C1C=CC=C2)O	C1([Se][Se]C2=CC=CC=C2)=CC=CC=C1	OC(C1=CN(CC2=CC=CC=C2)C=CC1)=O	CS(C)=O	C1(CCC[Se]C2=CC=CC=C2)=CNC3=C1C=CC=C3	0.698121
301	CC1=CC=C(S(N2CCC(C(O)=O)CC2)(=O)=O)C=C1	C1([Se][Se]C2=CC=CC=C2)=CC=CC=C1	OC(C1=CN(CC2=CC=CC=C2)C=CC1)=O	CC#N	CC1=CC=C(S(N2CCC([Se]C3=CC=CC=C3)CC2)(=O)=O)C=C1	0.699796
302	O=C(CCCC1=CNC2=C1C=CC=C2)O	C1([Se][Se]C2=CC=CC=C2)=CC=CC=C1	CC1=C(C(OCC)=O)CC(C(OCC)=O)=C(C)N1	CS(C)=O	C1(CCC[Se]C2=CC=CC=C2)=CNC3=C1C=CC=C3	0.700743
303	O=C(CC1=CNC2=C1C=CC=C2)O	CC[Se][Se]CC	NC(C1=CN(CCCC)C=CC1)=O	CS(C)=O	CC[Se]CC1=CNC2=C1C=CC=C2	0.701837
304	CC(C1=CC=C(CC2C(CCC2)=O)C=C1)C(O)=O	C1([Se][Se]C2=CC=CC=C2)=CC=CC=C1	CC(C1=CN(CC2=CC=CC=C2)C=CC1)=O	CC#N	CC(C1=CC=C(CC2C(CCC2)=O)C=C1)[Se]C3=CC=CC=C3	0.71
305	O=C1C2=CC(CC(O)=O)=CC=C2OCC3=CC=CC=C13	C1([Se][Se]C2=CC=CC=C2)=CC=CC=C1	CC(C1=CN(CC2=CC=CC=C2)C=CC1)=O	CC#N	O=C1C2=CC(C[Se]C3=CC=CC=C3)=CC=C2OCC4=CC=CC=C14	0.72
306	CC(N1C(C2=CC=C(Cl)C=C2)=O)=C(CC(O)=O)C3=C1C=CC(OC)=C3	C1([Se][Se]C2=CC=CC=C2)=CC=CC=C1	OC(C1=CN(CC2=CC=CC=C2)C=CC1)=O	CS(C)=O	CC(N1C(C2=CC=C(Cl)C=C2)=O)=C(C[Se]C3=CC=CC=C3)C4=C1C=CC(OC)=C4	0.721013
307	O=C(N1CCC(C(O)=O)CC1)OCC2=CC=CC=C2	C1([Se][Se]C2=CC=CC=C2)=CC=CC=C1	CC1=C(C(OCC)=O)CC(C(OCC)=O)=C(C)N1	[H]C(N(C)C)=O	O=C(N1CCC([Se]C2=CC=CC=C2)CC1)OCC3=CC=CC=C3	0.740958
308	O=C1C2=CC(CC(O)=O)=CC=C2OCC3=CC=CC=C13	C1([Se][Se]C2=CC=CC=C2)=CC=CC=C1	OC(C1=CN(CC2=CC=CC=C2)C=CC1)=O	[H]C(N(C)C)=O	O=C1C2=CC(C[Se]C3=CC=CC=C3)=CC=C2OCC4=CC=CC=C14	0.742883
309	O=C(N1CCC(C(O)=O)CC1)OCC2=CC=CC=C2	C1([Se][Se]C2=CC=CC=C2)=CC=CC=C1	OC(C1=CN(CC2=CC=CC=C2)C=CC1)=O	[H]C(N(C)C)=O	O=C(N1CCC([Se]C2=CC=CC=C2)CC1)OCC3=CC=CC=C3	0.743712
310	CC(C1=CC=C2C=C(OC)C=CC2=C1)C(O)=O	C1([Se][Se]C2=CC=CC=C2)=CC=CC=C1	CC(C1=CN(CC2=CC=CC=C2)C=CC1)=O	CS(C)=O	CC(C1=CC=C2C=C(OC)C=CC2=C1)[Se]C3=CC=CC=C3	0.755
311	O=C(C1CCOCC1)O	C1([Se][Se]C2=CC=CC=C2)=CC=CC=C1	OC(C1=CN(CC2=CC=CC=C2)C=CC1)=O	[H]C(N(C)C)=O	C1([Se]C2=CC=CC=C2)CCOCC1	0.758054
312	O=C(CCCC1=CNC2=C1C=CC=C2)O	C1([Se][Se]C2=CC=CC=C2)=CC=CC=C1	NC(C1=CN(CCCC)C=CC1)=O	CS(C)=O	C1(CCC[Se]C2=CC=CC=C2)=CNC3=C1C=CC=C3	0.759737
313	O=C(N1CCC(C(O)=O)CC1)OCC2=CC=CC=C2	C1([Se][Se]C2=CC=CC=C2)=CC=CC=C1	OC(C1=CN(CC2=CC=CC=C2)C=CC1)=O	CS(C)=O	O=C(N1CCC([Se]C2=CC=CC=C2)CC1)OCC3=CC=CC=C3	0.776554
314	O=C(OCC1=CC=CC=C1)[C@H](NC(OC(C)(C)C)=O)CC(O)=O	C1([Se][Se]C2=CC=CC=C2)=CC=CC=C1	OC(C1=CN(CC2=CC=CC=C2)C=CC1)=O	CS(C)=O	O=C(OCC1=CC=CC=C1)[C@H](NC(OC(C)(C)C)=O)C[Se]C2=CC=CC=C2	0.784191
315	O=C(OCC1=CC=CC=C1)[C@H](NC(OC(C)(C)C)=O)CC(O)=O	C1([Se][Se]C2=CC=CC=C2)=CC=CC=C1	OC(C1=CN(CC2=CC=CC=C2)C=CC1)=O	[H]C(N(C)C)=O	O=C(OCC1=CC=CC=C1)[C@H](NC(OC(C)(C)C)=O)C[Se]C2=CC=CC=C2	0.784191
316	O=C(OCC1=CC=CC=C1)[C@H](NC(OC(C)(C)C)=O)CC(O)=O	C1([Se][Se]C2=CC=CC=C2)=CC=CC=C1	CC1=C(C(OCC)=O)CC(C(OCC)=O)=C(C)N1	CS(C)=O	O=C(OCC1=CC=CC=C1)[C@H](NC(OC(C)(C)C)=O)C[Se]C2=CC=CC=C2	0.790032
317	O=C(OCC1=CC=CC=C1)[C@H](NC(OC(C)(C)C)=O)CC(O)=O	C1([Se][Se]C2=CC=CC=C2)=CC=CC=C1	CC1=C(C(OCC)=O)CC(C(OCC)=O)=C(C)N1	[H]C(N(C)C)=O	O=C(OCC1=CC=CC=C1)[C@H](NC(OC(C)(C)C)=O)C[Se]C2=CC=CC=C2	0.790032
318	O=C1C2=CC(CC(O)=O)=CC=C2OCC3=CC=CC=C13	C1([Se][Se]C2=CC=CC=C2)=CC=CC=C1	NC(C1=CN(CCCC)C=CC1)=O	CS(C)=O	O=C1C2=CC(C[Se]C3=CC=CC=C3)=CC=C2OCC4=CC=CC=C14	0.798556
319	O=C(C1CCOCC1)O	C1([Se][Se]C2=CC=CC=C2)=CC=CC=C1	NC(C1=CN(CCCC)C=CC1)=O	[H]C(N(C)C)=O	C1([Se]C2=CC=CC=C2)CCOCC1	0.808194
320	CC1=CC=C(CC(O)=O)C=C1	C1([Se][Se]C2=CC=CC=C2)=CC=CC=C1	CC1=C(C(OCC)=O)CC(C(OCC)=O)=C(C)N1	CS(C)=O	CC1=CC=C(C[Se]C2=CC=CC=C2)C=C1	0.815255
321	O=C(OCC1=CC=CC=C1)[C@H](NC(OC(C)(C)C)=O)CC(O)=O	C1([Se][Se]C2=CC=CC=C2)=CC=CC=C1	NC(C1=CN(CCCC)C=CC1)=O	[H]C(N(C)C)=O	O=C(OCC1=CC=CC=C1)[C@H](NC(OC(C)(C)C)=O)C[Se]C2=CC=CC=C2	0.832384
322	O=C(OCC1=CC=CC=C1)[C@H](NC(OC(C)(C)C)=O)CC(O)=O	C1([Se][Se]C2=CC=CC=C2)=CC=CC=C1	NC(C1=CN(CCCC)C=CC1)=O	CS(C)=O	O=C(OCC1=CC=CC=C1)[C@H](NC(OC(C)(C)C)=O)C[Se]C2=CC=CC=C2	0.832384
323	O=C(N1CCC(C(O)=O)CC1)OCC2=CC=CC=C2	C1([Se][Se]C2=CC=CC=C2)=CC=CC=C1	NC(C1=CN(CCCC)C=CC1)=O	[H]C(N(C)C)=O	O=C(N1CCC([Se]C2=CC=CC=C2)CC1)OCC3=CC=CC=C3	0.843251
324	O=C1C2=CC(CC(O)=O)=CC=C2OCC3=CC=CC=C13	C1([Se][Se]C2=CC=CC=C2)=CC=CC=C1	CC1=C(C(OCC)=O)CC(C(OCC)=O)=C(C)N1	CS(C)=O	O=C1C2=CC(C[Se]C3=CC=CC=C3)=CC=C2OCC4=CC=CC=C14	0.847605
325	O=C1C2=CC(CC(O)=O)=CC=C2OCC3=CC=CC=C13	C1([Se][Se]C2=CC=CC=C2)=CC=CC=C1	OC(C1=CN(CC2=CC=CC=C2)C=CC1)=O	CS(C)=O	O=C1C2=CC(C[Se]C3=CC=CC=C3)=CC=C2OCC4=CC=CC=C14	0.847793
326	O=C(CCC1=CC=CC=C1)O	C1([Se][Se]C2=CC=CC=C2)=CC=CC=C1	CC1=C(C(OCC)=O)CC(C(OCC)=O)=C(C)N1	CS(C)=O	C1(CC[Se]C2=CC=CC=C2)=CC=CC=C1	0.85851
327	CC1=CC=C(CC(O)=O)C=C1	C1([Se][Se]C2=CC=CC=C2)=CC=CC=C1	NC(C1=CN(CCCC)C=CC1)=O	CS(C)=O	CC1=CC=C(C[Se]C2=CC=CC=C2)C=C1	0.864477
328	O=C(C1CCOCC1)O	C1([Se][Se]C2=CC=CC=C2)=CC=CC=C1	NC(C1=CN(CCCC)C=CC1)=O	CS(C)=O	C1([Se]C2=CC=CC=C2)CCOCC1	0.866792
329	O=C(N1CCC(C(O)=O)CC1)OCC2=CC=CC=C2	C1([Se][Se]C2=CC=CC=C2)=CC=CC=C1	NC(C1=CN(CCCC)C=CC1)=O	CS(C)=O	O=C(N1CCC([Se]C2=CC=CC=C2)CC1)OCC3=CC=CC=C3	0.880488
330	CC1=CC=C(CC(O)=O)C=C1	C1([Se][Se]C2=CC=CC=C2)=CC=CC=C1	OC(C1=CN(CC2=CC=CC=C2)C=CC1)=O	CS(C)=O	CC1=CC=C(C[Se]C2=CC=CC=C2)C=C1	0.892394
331	O=C(CCC1=CC=CC=C1)O	C1([Se][Se]C2=CC=CC=C2)=CC=CC=C1	OC(C1=CN(CC2=CC=CC=C2)C=CC1)=O	CS(C)=O	C1(CC[Se]C2=CC=CC=C2)=CC=CC=C1	0.905295
332	O=C(CCC1=CC=CC=C1)O	C1([Se][Se]C2=CC=CC=C2)=CC=CC=C1	NC(C1=CN(CCCC)C=CC1)=O	CS(C)=O	C1(CC[Se]C2=CC=CC=C2)=CC=CC=C1	0.945481
333	CC1=CC=C(S(N2CCC(C(O)=O)CC2)(=O)=O)C=C1	C1([Se][Se]C2=CC=CC=C2)=CC=CC=C1	NC(C1=CN(CCCC)C=CC1)=O	CC#N	CC1=CC=C(S(N2CCC([Se]C3=CC=CC=C3)CC2)(=O)=O)C=C1	0.98042
334	CC1=CC=C(S(N2CCC(C(O)=O)CC2)(=O)=O)C=C1	C1([Se][Se]C2=CC=CC=C2)=CC=CC=C1	CC1=C(C(OCC)=O)CC(C(OCC)=O)=C(C)N1	CS(C)=O	CC1=CC=C(S(N2CCC([Se]C3=CC=CC=C3)CC2)(=O)=O)C=C1	0.983279
335	CC1=CC=C(S(N2CCC(C(O)=O)CC2)(=O)=O)C=C1	C1([Se][Se]C2=CC=CC=C2)=CC=CC=C1	OC(C1=CN(CC2=CC=CC=C2)C=CC1)=O	CS(C)=O	CC1=CC=C(S(N2CCC([Se]C3=CC=CC=C3)CC2)(=O)=O)C=C1	0.99
336	CC1=CC=C(S(N2CCC(C(O)=O)CC2)(=O)=O)C=C1	C1([Se][Se]C2=CC=CC=C2)=CC=CC=C1	NC(C1=CN(CCCC)C=CC1)=O	CS(C)=O	CC1=CC=C(S(N2CCC([Se]C3=CC=CC=C3)CC2)(=O)=O)C=C1	0.99
