# Supplementary material for: HTE- and AI-assisted development of DHP-catalyzed decarboxylative selenation
Source: Royal Society of Chemistry journal article supplement (doi:10.1039/d2cc06217h), 2023-01-01
Supplement: d2cc06217h2.xlsx [file d2cc06217h2.xlsx]

## Sheet: Figure S5_XGB
0	1	2	3	4	5	6	7	8	9	10	11	12	13	14	15	16	17	18	19	20	21	22	23	24	25	26	27	28	29	30	31	32	33	34	35	36	37	38	39	40	41	42	43	44	45	46	47	48	49
0	0	0	1	0	4	0	0	0	0	3	0	1	2	0	0	0	3	1	1	0	0	1	0	0	2	1	0	0	0	0	0	0	1	0	0	1	0	0	2	1	0	1	2	1	0	0	3	0	1
1	0	0	1	0	4	1	0	0	0	3	3	1	1	0	0	2	2	0	1	0	0	0	1	0	2	1	0	0	0	3	0	0	1	1	0	1	0	1	2	0	0	1	0	1	2	0	3	2	0
3	3	1	1	1	3	1	0	1	1	3	1	1	3	0	0	0	2	0	1	0	0	0	1	0	3	1	2	0	0	1	0	0	3	1	0	1	0	0	2	0	1	0	0	1	1	0	2	1	0
2	0	0	1	0	4	1	0	0	0	3	1	1	1	0	0	0	2	0	1	0	0	1	1	0	2	0	0	1	0	3	2	2	3	1	0	1	1	1	3	0	0	1	0	1	2	0	3	1	0
2	0	0	1	0	4	1	0	0	0	3	1	1	0	0	0	0	2	0	1	0	0	1	1	0	2	1	0	0	0	2	2	2	3	1	0	1	0	1	3	0	0	1	1	1	2	0	3	1	0
0	0	1	1	0	4	0	1	0	0	2	0	1	0	0	0	0	2	0	1	0	2	2	0	0	2	1	0	1	0	0	0	0	1	1	0	1	0	0	2	0	0	3	1	1	0	0	4	0	0
0	0	0	1	0	4	1	2	2	0	3	1	1	1	0	0	0	2	0	1	0	0	1	1	0	2	0	2	1	0	3	0	0	1	1	0	3	1	1	2	0	0	1	0	1	2	0	3	1	0
1	0	0	1	0	3	0	0	0	0	2	0	1	3	0	0	0	3	1	1	0	0	2	0	0	2	1	0	0	0	1	0	0	2	1	0	1	0	0	2	0	0	0	0	1	0	0	2	1	1
1	0	1	1	0	3	0	1	0	0	4	0	1	1	0	0	0	2	0	1	0	0	0	0	0	0	1	0	1	0	1	0	0	2	0	0	0	2	2	2	1	0	2	1	1	0	0	3	1	0
1	2	0	1	2	3	0	0	0	0	4	0	1	1	0	0	0	0	1	3	0	0	0	0	0	1	1	2	0	0	3	0	0	4	1	0	0	0	0	2	1	0	2	1	1	2	0	3	3	0
4	0	0	1	0	3	0	0	0	0	4	2	1	1	0	0	0	0	0	1	0	0	0	1	0	0	1	0	0	0	3	2	2	4	1	0	0	0	0	3	0	0	2	0	1	2	0	2	1	0
1	1	0	1	0	3	0	0	1	1	4	3	1	1	0	0	2	0	1	2	0	2	0	0	0	0	1	0	0	0	3	0	0	1	1	0	0	0	0	2	0	1	2	0	3	1	0	3	1	0
1	0	0	1	0	4	0	0	0	0	4	3	1	0	0	0	2	0	1	2	0	2	0	0	0	0	1	0	0	0	2	0	0	1	1	0	0	0	0	2	0	0	3	1	3	0	0	4	0	0
3	2	0	1	0	4	0	0	2	0	4	1	1	0	0	0	2	0	0	3	0	0	0	0	0	0	1	0	0	0	0	0	0	3	1	0	0	1	2	3	0	0	4	2	1	0	0	4	0	0
2	2	0	1	0	2	0	0	0	0	4	0	1	1	0	0	0	1	0	1	0	0	1	0	0	1	1	2	0	0	1	0	0	4	1	0	1	0	2	3	0	0	1	0	1	0	0	3	1	0
1	0	1	1	0	1	0	1	0	0	3	0	1	1	0	0	0	2	0	1	0	0	1	0	0	0	1	0	1	0	1	0	0	4	1	0	0	2	3	2	0	0	0	0	1	0	0	2	1	0
0	0	1	1	0	2	0	1	0	0	3	0	1	1	0	0	0	2	0	1	0	0	1	0	0	0	0	0	2	0	1	0	0	3	1	0	0	3	3	2	0	0	1	0	1	0	0	3	0	0
0	2	0	1	2	2	0	0	0	0	4	0	1	1	0	0	0	0	0	3	0	0	1	0	0	1	0	2	1	0	3	0	0	4	2	0	0	1	2	2	0	0	1	0	1	2	0	3	2	0
2	0	2	1	0	2	0	0	0	0	4	0	1	2	0	1	0	2	1	3	0	1	1	0	0	0	1	0	0	0	0	0	0	4	1	0	0	0	2	3	1	0	1	1	1	2	2	1	2	2
0	1	0	1	0	1	0	0	1	1	4	0	1	1	0	0	0	2	1	1	0	0	0	0	0	0	1	0	0	0	1	0	0	3	0	0	0	2	3	2	3	1	0	1	1	1	0	2	1	0
1	0	0	1	0	3	0	0	0	0	4	1	1	1	0	0	0	1	1	1	0	0	0	0	0	0	1	0	0	0	1	0	0	4	1	0	0	0	2	2	1	0	1	0	1	0	0	3	1	0
1	0	0	1	0	3	0	0	0	0	4	1	1	0	0	0	0	1	1	1	0	0	0	0	0	0	1	0	0	0	0	0	0	4	1	0	0	0	2	2	1	0	1	1	1	0	0	3	0	0
0	0	0	1	0	3	0	0	0	0	3	0	1	1	0	0	0	1	1	1	0	0	1	0	0	0	1	0	0	0	1	0	0	4	1	0	0	0	2	2	1	0	1	0	1	0	0	3	1	0
0	0	0	1	0	4	0	0	0	0	3	0	1	3	0	0	0	3	1	1	0	0	1	0	0	2	0	0	1	0	1	0	0	1	0	0	1	1	0	2	1	0	1	1	1	0	0	3	0	1
2	3	1	1	1	3	1	0	1	1	3	0	1	3	0	0	0	2	0	1	0	0	0	1	0	3	1	2	0	0	1	0	0	3	0	0	1	0	0	2	1	1	0	1	1	1	0	2	1	0
1	0	0	1	0	4	0	0	0	0	3	1	1	3	0	0	0	3	1	1	0	0	1	0	0	2	0	0	1	0	1	0	0	1	1	0	1	1	0	2	0	0	1	0	1	0	0	3	0	1
2	0	0	1	0	3	1	0	0	0	3	3	1	1	0	0	2	2	0	1	0	0	0	1	0	2	1	0	0	0	3	0	0	2	1	0	1	0	1	2	0	0	0	0	1	2	0	2	2	0
2	0	2	1	0	4	0	0	0	0	3	0	1	3	0	1	0	3	1	3	0	0	2	0	0	2	1	0	0	0	1	0	0	3	1	0	1	0	0	3	0	0	1	0	1	2	2	3	3	2
0	0	0	1	0	4	0	0	0	0	2	0	1	1	0	0	0	2	1	1	0	0	2	0	0	2	1	0	0	0	1	0	0	3	1	0	1	0	0	2	0	0	1	0	1	0	0	4	1	1
2	2	0	1	0	4	0	0	0	0	4	0	1	0	0	0	0	1	0	1	0	0	0	0	0	1	1	2	0	0	0	0	0	3	0	0	0	0	0	3	1	0	3	2	1	0	0	4	0	0
3	2	0	1	0	4	0	0	0	0	4	1	1	1	0	0	0	1	0	1	0	0	0	0	0	1	0	2	1	0	1	0	0	3	1	0	0	1	0	3	0	0	3	0	1	0	0	4	0	0
1	0	1	1	0	4	0	1	0	0	4	1	1	0	0	0	0	2	0	1	0	0	0	0	0	0	1	0	1	0	0	0	0	1	1	0	0	2	2	2	0	0	3	1	1	0	0	4	0	0
3	0	0	1	0	4	0	0	0	0	4	2	1	1	0	0	0	0	0	1	0	0	0	1	0	0	1	0	0	0	3	2	2	3	1	0	0	0	0	3	0	0	3	0	1	2	0	3	1	0
3	0	0	1	0	4	0	0	0	0	4	2	1	1	0	0	0	0	0	1	0	0	0	1	0	0	0	0	1	0	3	2	2	3	1	0	0	1	0	3	0	0	3	0	1	2	0	3	0	0
0	2	0	1	2	4	0	0	0	0	3	0	1	1	0	0	0	0	1	3	0	0	1	0	0	1	0	2	1	0	3	0	0	3	2	0	0	1	0	2	0	0	3	0	1	2	0	4	2	0
2	0	2	1	0	4	0	0	0	0	3	0	1	3	0	1	0	1	1	3	0	1	1	0	0	0	0	0	1	0	1	0	0	3	1	0	0	1	0	3	0	0	3	0	1	2	2	3	2	2
2	2	0	1	0	4	0	0	2	0	4	0	1	1	0	0	2	0	0	3	0	0	0	0	0	0	1	0	0	0	1	0	0	3	0	0	0	1	2	3	1	0	4	2	1	0	0	4	1	0
0	1	0	1	2	3	0	0	1	1	3	1	1	1	0	0	0	0	0	1	0	0	0	1	0	0	1	0	0	0	3	0	0	1	0	0	0	0	0	3	1	1	2	1	1	3	0	2	1	0
1	0	0	1	0	4	0	0	0	0	4	2	3	0	0	0	0	0	0	3	0	0	0	1	0	0	1	0	0	0	2	0	0	1	1	0	0	0	0	3	0	2	4	1	1	2	0	4	0	0
1	0	0	1	0	3	0	0	0	0	3	1	3	1	0	0	0	0	0	3	0	0	1	1	0	0	1	0	0	0	3	0	0	2	1	0	0	0	0	3	0	2	3	0	1	2	0	3	1	0
2	2	0	1	0	4	0	0	2	0	3	0	1	1	0	0	2	0	0	3	0	0	1	0	0	0	0	0	1	0	1	0	0	3	1	0	0	2	2	3	0	0	4	1	1	0	0	4	0	0
2	0	0	1	0	2	0	0	0	0	4	0	1	1	0	0	0	2	1	1	0	0	0	0	0	0	1	0	0	0	1	2	0	4	0	0	0	0	2	2	2	0	1	1	1	0	0	1	1	0
3	0	0	1	0	1	0	0	0	0	4	0	1	3	0	0	0	2	1	1	0	0	0	0	0	0	1	0	0	0	1	0	0	5	0	0	0	0	2	2	2	0	0	1	1	0	0	0	1	0
3	1	0	1	0	1	0	0	1	1	4	1	1	3	0	0	0	2	1	1	0	0	0	0	0	0	1	0	0	0	1	0	0	4	1	0	0	0	2	2	1	1	0	0	1	1	0	0	1	0
0	2	0	1	2	4	0	0	0	0	4	0	1	1	0	0	0	0	1	3	0	0	0	0	0	1	1	2	0	0	3	0	0	3	1	0	0	0	0	2	1	0	3	1	1	2	0	4	3	0
2	0	2	1	0	4	0	0	0	0	4	0	1	3	0	1	0	1	1	3	0	1	0	0	0	0	0	0	1	0	1	0	0	3	0	0	0	1	0	3	1	0	3	1	1	2	2	3	2	2
1	0	1	1	0	4	0	1	0	0	4	1	1	1	0	0	0	2	0	1	0	0	0	0	0	0	1	0	1	0	1	0	0	1	1	0	0	2	2	2	0	0	3	0	1	0	0	4	1	0
0	0	1	1	0	4	0	1	0	0	3	0	1	1	0	0	0	2	0	1	0	0	1	0	0	0	1	0	1	0	1	0	0	1	1	0	0	2	2	2	0	0	3	0	1	0	0	4	1	0
0	0	0	1	0	4	0	0	0	0	3	2	1	0	0	0	2	0	1	2	0	2	1	0	0	0	1	0	0	0	2	0	0	1	1	0	0	0	0	2	0	0	3	1	3	0	0	4	0	0
1	1	2	1	2	3	0	0	1	1	3	2	1	1	0	0	0	0	0	1	0	0	0	1	0	0	1	0	0	0	3	0	0	1	1	0	0	0	0	2	0	1	2	0	1	3	0	2	1	0
1	0	2	1	2	4	0	0	0	0	3	2	1	1	0	0	0	0	0	1	0	0	0	1	0	0	0	0	1	0	3	0	0	1	1	0	0	1	0	2	0	0	3	0	1	2	0	3	0	0
1	0	0	1	2	4	0	0	0	0	3	2	1	1	0	0	0	0	0	1	0	0	0	1	0	0	0	0	1	0	3	0	0	1	1	0	0	1	0	3	0	0	3	0	1	2	0	3	0	0
2	2	0	1	1	4	0	0	0	0	2	0	1	2	0	0	0	0	1	1	0	0	1	1	0	1	1	2	0	0	0	0	0	3	1	0	0	0	0	2	0	0	3	1	1	0	0	3	0	0
2	2	0	1	0	2	0	0	0	0	5	0	1	0	0	0	0	1	0	1	0	0	0	0	0	1	1	2	0	0	0	0	0	4	0	0	1	0	2	3	1	0	1	2	1	0	0	3	0	0
1	1	1	1	0	1	0	1	1	1	4	1	1	1	0	0	0	2	0	1	0	0	0	0	0	0	1	0	1	0	1	0	0	3	1	0	0	2	3	2	0	1	0	0	1	1	0	2	1	0
3	1	0	1	0	1	0	0	1	1	5	2	1	1	0	0	0	0	0	1	0	0	0	1	0	0	1	0	0	0	3	2	2	4	1	0	0	0	2	3	0	1	0	0	1	3	0	0	1	0
1	1	0	1	0	2	0	0	1	1	5	3	1	1	0	0	2	1	1	1	0	2	0	0	0	0	1	0	0	0	3	0	0	3	1	0	0	0	2	2	1	1	0	0	3	1	0	2	1	0
0	1	1	1	0	1	0	1	1	1	3	0	1	1	0	0	0	2	0	1	0	0	1	0	0	0	1	0	1	0	1	0	0	3	1	0	0	2	3	2	0	1	0	0	1	1	0	2	1	0
0	1	0	1	0	2	0	0	1	1	4	0	1	3	0	0	0	2	1	1	0	0	0	0	0	0	1	0	0	0	1	0	0	3	0	0	0	0	2	2	2	1	0	1	1	1	0	0	1	0
2	0	0	1	0	2	0	0	0	0	4	0	1	3	0	0	0	2	1	1	0	0	0	0	0	0	0	0	1	0	1	0	0	4	0	0	0	1	2	2	2	0	1	1	1	0	0	1	0	0
2	1	0	1	0	1	0	0	1	1	3	0	1	1	0	0	0	2	1	1	0	0	1	0	0	0	1	0	0	0	1	2	0	4	1	0	0	0	2	2	1	1	0	0	1	1	0	0	1	0
0	0	1	1	0	4	0	1	0	0	3	0	1	1	0	0	0	2	0	1	0	2	1	0	0	2	0	0	2	0	1	0	0	1	0	0	1	1	0	2	1	0	3	1	1	0	0	4	0	0
0	0	0	1	0	4	1	2	2	0	4	1	1	1	0	0	0	2	0	1	0	0	0	1	0	2	0	2	1	0	3	0	0	1	0	0	3	1	1	2	1	0	1	1	1	2	0	3	1	0
2	2	1	1	2	3	1	0	0	0	4	1	1	1	0	0	0	2	0	3	0	0	0	0	0	3	1	2	0	0	3	0	0	4	2	0	1	0	0	2	0	0	0	0	1	2	0	3	3	0
1	0	0	1	0	3	1	2	2	0	3	1	1	1	0	0	0	2	0	1	0	0	1	1	0	2	1	2	0	0	3	0	0	2	1	0	3	0	1	2	0	0	0	0	1	2	0	2	2	0
0	1	0	1	0	3	0	0	1	1	3	2	1	1	0	0	2	2	1	1	0	2	2	0	0	2	1	0	0	0	3	0	0	1	1	0	1	0	0	2	0	1	0	0	3	1	0	3	1	1
2	0	0	1	0	4	0	0	0	0	2	0	1	1	0	0	0	3	1	1	0	0	2	0	0	2	0	0	1	0	1	2	0	3	1	0	1	1	0	2	0	0	1	0	1	0	0	3	0	1
0	1	0	1	0	3	0	0	1	1	2	0	1	1	0	0	0	2	1	1	0	0	2	0	0	2	1	0	0	0	1	0	0	3	1	0	1	0	0	2	0	1	0	0	1	1	0	3	1	1
0	0	1	1	2	4	0	0	0	0	3	1	1	0	0	0	0	2	0	2	0	0	1	1	0	2	1	0	0	0	2	0	0	1	1	0	3	0	0	2	1	0	1	1	3	0	0	4	1	0
0	0	2	1	2	4	0	0	0	0	3	1	1	0	0	0	0	0	0	1	0	0	0	1	0	0	1	0	0	0	2	0	0	1	0	0	0	0	0	2	1	0	3	2	1	2	0	3	0	0
1	0	0	1	2	3	0	0	0	0	3	1	1	1	0	0	0	0	0	1	0	0	0	1	0	0	1	0	0	0	3	0	0	2	0	0	0	0	0	3	1	0	2	1	1	2	0	2	1	0
0	0	0	1	2	4	0	0	0	0	3	1	1	0	0	0	0	0	0	1	0	0	0	1	0	0	1	0	0	0	2	0	0	1	0	0	0	0	0	3	1	0	3	2	1	2	0	3	0	0
2	3	0	1	1	3	0	0	1	1	3	0	1	3	0	0	0	0	1	1	0	0	0	1	0	1	1	2	0	0	1	0	0	3	0	0	0	0	0	2	1	1	2	1	1	1	0	2	1	0
2	2	0	1	1	4	0	0	0	0	3	0	1	2	0	0	0	0	1	1	0	0	0	1	0	1	1	2	0	0	0	0	0	3	0	0	0	0	0	2	1	0	3	2	1	0	0	3	0	0
0	0	0	1	0	4	0	0	0	0	3	1	3	1	0	0	0	0	0	3	0	0	1	1	0	0	1	0	0	0	3	0	0	1	1	0	0	0	0	3	0	2	4	0	1	2	0	4	1	0
2	3	0	1	0	1	0	0	1	1	5	0	1	1	0	0	0	1	0	1	0	0	0	0	0	1	1	2	0	0	1	0	0	4	0	0	1	0	2	3	1	1	0	1	1	1	0	2	1	0
0	1	1	1	0	1	0	1	1	1	4	0	1	1	0	0	0	2	0	1	0	0	0	0	0	0	1	0	1	0	1	0	0	3	0	0	0	2	3	2	1	1	0	1	1	1	0	2	1	0
1	0	0	1	0	2	0	0	0	0	5	2	1	1	0	0	2	1	1	1	0	2	0	0	0	0	1	0	0	0	3	0	0	4	0	0	0	0	2	2	2	0	0	1	3	0	0	2	1	0
3	0	2	1	0	2	0	0	0	0	5	1	1	3	0	1	0	2	1	3	0	1	0	0	0	0	0	0	1	0	1	0	0	4	1	0	0	1	2	3	1	0	1	0	1	2	2	1	2	2
2	0	0	1	0	2	0	0	0	0	4	1	1	0	0	0	0	0	0	1	0	0	1	1	0	0	1	0	0	0	2	2	2	4	1	0	0	0	2	3	0	0	1	1	1	2	0	1	0	0
2	1	2	1	0	1	0	0	1	1	4	0	1	3	0	1	0	2	1	3	0	1	1	0	0	0	1	0	0	0	1	0	0	4	1	0	0	0	2	3	1	1	0	0	1	3	2	0	3	2
0	0	0	1	0	2	0	0	0	0	3	0	1	1	0	0	0	2	1	1	0	0	1	0	0	0	1	0	0	0	1	0	0	3	1	0	0	2	3	2	2	0	1	0	1	0	0	3	1	0
0	2	1	1	2	4	1	0	0	0	4	0	1	1	0	0	0	2	0	3	0	0	0	0	0	3	1	2	0	0	3	0	0	3	1	0	1	0	0	2	1	0	1	1	1	2	0	4	3	0
0	0	1	1	0	4	0	1	0	0	3	0	1	0	0	0	0	2	0	1	0	2	1	0	0	2	1	0	1	0	0	0	0	1	0	0	1	0	0	2	1	0	3	2	1	0	0	4	0	0
0	0	0	1	0	4	1	2	2	0	4	1	1	1	0	0	0	2	0	1	0	0	0	1	0	2	1	2	0	0	3	0	0	1	0	0	3	0	1	2	1	0	1	1	1	2	0	3	2	0
2	2	1	1	1	4	1	0	0	0	3	0	1	3	0	0	0	2	0	1	0	0	0	1	0	3	0	2	1	0	1	0	0	3	0	0	1	1	0	2	1	0	1	1	1	0	0	3	0	0
0	0	1	1	2	4	0	0	0	0	4	1	1	1	0	0	0	2	0	2	0	0	0	1	0	2	1	0	0	0	3	0	0	1	0	0	3	0	0	2	2	0	1	1	3	0	0	4	2	0
1	0	1	1	0	4	0	1	0	0	3	1	1	1	0	0	0	2	0	1	0	2	1	0	0	2	1	0	1	0	1	0	0	1	1	0	1	0	0	2	0	0	3	0	1	0	0	4	1	0
1	0	0	1	0	4	0	0	0	0	4	3	1	1	0	0	2	2	1	1	0	2	1	0	0	2	1	0	0	0	3	0	0	1	1	0	1	0	0	2	0	0	1	0	3	0	0	4	1	1
1	0	0	1	0	4	1	0	0	0	4	2	3	1	0	0	0	2	0	3	0	0	0	1	0	2	1	0	0	0	3	0	0	1	1	0	1	0	1	3	0	2	3	0	1	2	0	4	2	0
3	3	0	1	0	3	0	0	3	1	4	1	1	1	0	0	2	2	0	3	0	0	1	0	0	2	1	0	0	0	1	0	0	3	1	0	1	1	2	3	1	1	2	1	1	1	0	3	1	0
0	0	0	1	0	4	0	0	0	0	3	2	1	0	0	0	2	2	1	1	0	2	2	0	0	2	1	0	0	0	2	0	0	1	1	0	1	0	0	2	0	0	1	1	3	0	0	4	0	1
3	0	2	1	0	3	0	0	0	0	3	0	1	3	0	1	0	3	1	3	0	0	2	0	0	2	1	0	0	0	1	0	0	4	1	0	1	0	0	3	0	0	0	0	1	2	2	2	3	2
2	0	0	1	0	4	0	0	0	0	4	1	1	1	0	0	0	0	0	1	0	0	0	1	0	0	0	0	1	0	3	2	2	3	0	0	0	1	0	3	1	0	3	1	1	2	0	3	0	0
0	3	0	1	2	3	0	0	1	1	4	0	1	1	0	0	0	0	1	3	0	0	0	0	0	1	1	2	0	0	3	0	0	3	1	0	0	0	0	2	1	1	2	1	1	3	0	3	3	0
2	1	2	1	0	3	0	0	1	1	4	0	1	3	0	1	0	1	1	3	0	1	0	0	0	0	1	0	0	0	1	0	0	3	0	0	0	0	0	3	1	1	2	1	1	3	2	2	3	2
1	0	0	1	0	4	0	0	0	0	4	3	1	1	0	0	2	0	1	2	0	2	0	0	0	0	1	0	0	0	3	0	0	1	1	0	0	0	0	2	0	0	3	0	3	0	0	4	1	0
0	1	1	1	0	3	0	1	1	1	3	0	1	1	0	0	0	2	0	1	0	0	1	0	0	0	1	0	1	0	1	0	0	1	1	0	0	2	2	2	0	1	2	0	1	1	0	3	1	0
2	0	2	1	2	3	0	0	0	0	3	2	1	1	0	0	0	0	0	1	0	0	0	1	0	0	1	0	0	0	3	0	0	2	1	0	0	0	0	2	0	0	2	0	1	2	0	2	1	0
0	0	2	1	2	4	0	0	0	0	2	1	1	0	0	0	0	0	0	1	0	0	1	1	0	0	1	0	0	0	2	0	0	1	1	0	0	0	0	2	0	0	3	1	1	2	0	3	0	0
2	0	0	1	0	2	0	0	0	0	5	1	1	0	0	0	0	0	0	1	0	0	0	1	0	0	1	0	0	0	2	2	2	4	0	0	0	0	2	3	1	0	1	2	1	2	0	1	0	0
0	1	0	1	0	2	0	0	1	1	5	2	1	1	0	0	2	1	1	1	0	2	0	0	0	0	1	0	0	0	3	0	0	3	0	0	0	0	2	2	2	1	0	1	3	1	0	2	1	0
2	1	2	1	0	1	0	0	1	1	5	0	1	3	0	1	0	2	1	3	0	1	0	0	0	0	1	0	0	0	1	0	0	4	0	0	0	0	2	3	2	1	0	1	1	3	2	0	3	2
4	0	0	1	0	1	0	0	0	0	5	2	1	1	0	0	0	0	0	1	0	0	0	1	0	0	1	0	0	0	3	2	2	5	1	0	0	0	2	3	0	0	0	0	1	2	0	0	1	0
1	3	0	1	2	1	0	0	1	1	5	1	1	1	0	0	0	0	0	3	0	0	0	0	0	1	1	2	0	0	3	0	0	4	2	0	0	0	2	2	0	1	0	0	1	3	0	2	3	0
1	2	0	1	2	1	0	0	0	0	4	0	1	1	0	0	0	0	0	3	0	0	1	0	0	1	1	2	0	0	3	0	0	5	2	0	0	0	2	2	0	0	0	0	1	2	0	2	3	0
0	0	0	1	0	3	0	0	0	0	4	0	1	3	0	0	0	2	1	1	0	0	0	0	0	0	1	0	0	0	1	0	0	3	0	0	0	0	2	2	2	0	1	1	1	0	0	1	1	0
0	0	1	1	0	4	0	1	0	0	3	0	1	0	0	0	0	3	0	1	0	0	1	0	0	2	1	0	1	0	0	0	0	1	0	0	1	2	2	2	1	0	1	2	1	0	0	4	0	0
1	0	0	1	0	3	1	0	0	0	4	1	3	1	0	0	0	2	0	3	0	0	0	1	0	2	1	0	0	0	3	0	0	2	0	0	1	0	1	3	1	2	2	1	1	2	0	3	2	0
0	0	0	1	0	4	1	0	0	0	4	1	3	1	0	0	0	2	0	3	0	0	0	1	0	2	0	0	1	0	3	0	0	1	0	0	1	1	1	3	1	2	3	1	1	2	0	4	1	0
3	2	1	1	1	3	1	0	0	0	3	0	1	3	0	0	0	2	0	1	0	0	0	1	0	3	1	2	0	0	1	0	0	4	0	0	1	0	0	2	1	0	0	1	1	0	0	2	1	0
0	0	1	1	2	4	0	0	0	0	4	1	1	1	0	0	0	2	0	2	0	0	0	1	0	2	0	0	1	0	3	0	0	1	0	0	3	1	0	2	2	0	1	1	3	0	0	4	1	0
4	0	0	1	0	3	1	0	0	0	4	2	1	1	0	0	0	2	0	1	0	0	0	1	0	2	1	0	0	0	3	2	2	4	1	0	1	0	1	3	0	0	0	0	1	2	0	2	2	0
1	0	0	1	0	4	1	2	2	0	4	2	1	0	0	0	0	2	0	1	0	0	0	1	0	2	1	2	0	0	2	0	0	1	1	0	3	0	1	2	0	0	1	1	1	2	0	3	1	0
1	2	1	1	2	4	1	0	0	0	4	1	1	0	0	0	0	2	0	3	0	0	0	0	0	3	1	2	0	0	2	0	0	3	2	0	1	0	0	2	0	0	1	1	1	2	0	4	2	0
3	0	2	1	0	4	0	0	0	0	4	1	1	2	0	1	0	3	1	3	0	0	1	0	0	2	1	0	0	0	0	0	0	3	1	0	1	0	0	3	0	0	1	1	1	2	2	3	2	2
3	2	1	1	1	4	1	0	0	0	3	1	1	3	0	0	0	2	0	1	0	0	0	1	0	3	1	2	0	0	1	0	0	3	1	0	1	0	0	2	0	0	1	0	1	0	0	3	1	0
0	0	0	1	0	4	0	0	0	0	3	2	1	1	0	0	2	2	1	1	0	2	2	0	0	2	0	0	1	0	3	0	0	1	1	0	1	1	0	2	0	0	1	0	3	0	0	4	0	1
0	2	1	1	2	4	1	0	0	0	3	0	1	1	0	0	0	2	0	3	0	0	1	0	0	3	1	2	0	0	3	0	0	3	2	0	1	0	0	2	0	0	1	0	1	2	0	4	3	0
2	1	0	1	0	3	0	0	1	1	2	0	1	1	0	0	0	3	1	1	0	0	2	0	0	2	1	0	0	0	1	2	0	3	1	0	1	0	0	2	0	1	0	0	1	1	0	2	1	1
2	0	0	1	0	4	0	0	0	0	2	0	1	0	0	0	0	3	1	1	0	0	2	0	0	2	1	0	0	0	0	2	0	3	1	0	1	0	0	2	0	0	1	1	1	0	0	3	0	1
0	0	0	1	0	4	0	0	0	0	4	2	1	1	0	0	2	0	1	2	0	2	0	0	0	0	0	0	1	0	3	0	0	1	0	0	0	1	0	2	1	0	3	1	3	0	0	4	0	0
1	2	0	1	2	4	0	0	0	0	4	1	1	1	0	0	0	0	1	3	0	0	0	0	0	1	0	2	1	0	3	0	0	3	2	0	0	1	0	2	0	0	3	0	1	2	0	4	2	0
3	2	0	1	1	3	0	0	0	0	3	0	1	3	0	0	0	0	1	1	0	0	0	1	0	1	1	2	0	0	1	0	0	4	0	0	0	0	0	2	1	0	2	1	1	0	0	2	1	0
1	0	2	1	2	4	0	0	0	0	3	2	1	0	0	0	0	0	0	1	0	0	0	1	0	0	1	0	0	0	2	0	0	1	1	0	0	0	0	2	0	0	3	1	1	2	0	3	0	0
1	1	0	1	0	3	0	0	1	1	4	2	3	1	0	0	0	0	0	3	0	0	0	1	0	0	1	0	0	0	3	0	0	1	1	0	0	0	0	3	0	3	3	0	1	3	0	3	1	0
3	2	0	1	0	4	0	0	2	0	4	1	1	1	0	0	2	0	0	3	0	0	0	0	0	0	1	0	0	0	1	0	0	3	1	0	0	1	2	3	0	0	4	1	1	0	0	4	1	0
2	2	0	1	2	1	0	0	0	0	5	1	1	1	0	0	0	0	0	3	0	0	0	0	0	1	1	2	0	0	3	0	0	5	2	0	0	0	2	2	0	0	0	0	1	2	0	2	3	0
3	0	2	1	0	2	0	0	0	0	5	1	1	2	0	1	0	2	1	3	0	1	0	0	0	0	1	0	0	0	0	0	0	4	1	0	0	0	2	3	1	0	1	1	1	2	2	1	2	2
2	2	0	1	0	2	0	0	0	0	4	0	1	0	0	0	0	1	0	1	0	0	1	0	0	1	1	2	0	0	0	0	0	4	1	0	1	0	2	3	0	0	1	1	1	0	0	3	0	0
2	0	0	1	0	2	0	0	0	0	4	0	1	1	0	0	0	2	1	1	0	0	0	0	0	0	0	0	1	0	1	2	0	4	0	0	0	1	2	2	2	0	1	1	1	0	0	1	0	0
1	1	0	1	0	2	0	0	1	1	4	1	1	3	0	0	0	2	1	1	0	0	0	0	0	0	1	0	0	0	1	0	0	3	1	0	0	0	2	2	1	1	0	0	1	1	0	0	1	0
3	0	0	1	0	2	0	0	0	0	4	1	1	3	0	0	0	2	1	1	0	0	0	0	0	0	0	0	1	0	1	0	0	4	1	0	0	1	2	2	1	0	1	0	1	0	0	1	0	0
1	2	1	1	2	3	1	0	0	0	4	0	1	1	0	0	0	2	0	3	0	0	0	0	0	3	1	2	0	0	3	0	0	4	1	0	1	0	0	2	1	0	0	1	1	2	0	3	3	0
1	0	0	1	0	3	1	2	2	0	4	1	1	1	0	0	0	2	0	1	0	0	0	1	0	2	1	2	0	0	3	0	0	2	0	0	3	0	1	2	1	0	0	1	1	2	0	2	2	0
0	0	0	1	0	4	1	0	0	0	3	2	1	1	0	0	2	2	0	1	0	0	0	1	0	2	1	0	0	0	3	0	0	1	0	0	1	0	1	2	1	0	1	1	1	2	0	3	2	0
2	3	0	1	0	3	0	0	3	1	4	0	1	1	0	0	2	2	0	3	0	0	1	0	0	2	1	0	0	0	1	0	0	3	0	0	1	1	2	3	2	1	2	2	1	1	0	3	1	0
1	3	1	1	2	3	1	0	1	1	4	1	1	1	0	0	0	2	0	3	0	0	0	0	0	3	1	2	0	0	3	0	0	3	2	0	1	0	0	2	0	1	0	0	1	3	0	3	3	0
1	0	0	1	0	4	0	0	0	0	3	1	1	3	0	0	0	3	1	1	0	0	1	0	0	2	1	0	0	0	1	0	0	1	1	0	1	0	0	2	0	0	1	0	1	0	0	3	1	1
4	0	0	1	0	3	0	0	0	0	3	1	1	3	0	0	0	3	1	1	0	0	1	0	0	2	1	0	0	0	1	0	0	4	1	0	1	0	0	2	0	0	0	0	1	0	0	2	1	1
3	0	0	1	0	3	1	0	0	0	3	1	1	1	0	0	0	2	0	1	0	0	1	1	0	2	1	0	0	0	3	2	2	4	1	0	1	0	1	3	0	0	0	0	1	2	0	2	2	0
0	0	0	1	0	4	0	0	0	0	2	0	1	0	0	0	0	2	1	1	0	0	2	0	0	2	1	0	0	0	0	0	0	3	1	0	1	0	0	2	0	0	1	1	1	0	0	4	0	1
0	0	0	1	0	4	1	0	0	0	3	1	3	0	0	0	0	2	0	3	0	0	1	1	0	2	1	0	0	0	2	0	0	1	1	0	1	0	1	3	0	2	3	1	1	2	0	4	1	0
0	0	1	1	2	4	0	0	0	0	3	1	1	1	0	0	0	2	0	2	0	0	1	1	0	2	0	0	1	0	3	0	0	1	1	0	3	1	0	2	1	0	1	0	3	0	0	4	1	0
0	2	0	1	2	4	0	0	0	0	4	0	1	0	0	0	0	0	1	3	0	0	0	0	0	1	1	2	0	0	2	0	0	3	1	0	0	0	0	2	1	0	3	2	1	2	0	4	2	0
0	1	0	1	0	3	0	0	1	1	4	1	3	1	0	0	0	0	0	3	0	0	0	1	0	0	1	0	0	0	3	0	0	1	0	0	0	0	0	3	1	3	3	1	1	3	0	3	1	0
2	2	0	1	0	4	0	0	2	0	4	0	1	0	0	0	2	0	0	3	0	0	0	0	0	0	1	0	0	0	0	0	0	3	0	0	0	1	2	3	1	0	4	3	1	0	0	4	0	0
1	0	0	1	0	4	0	0	0	0	4	2	3	1	0	0	0	0	0	3	0	0	0	1	0	0	0	0	1	0	3	0	0	1	1	0	0	1	0	3	0	2	4	0	1	2	0	4	0	0
2	2	0	1	0	2	0	0	0	0	5	0	1	1	0	0	0	1	0	1	0	0	0	0	0	1	1	2	0	0	1	0	0	4	0	0	1	0	2	3	1	0	1	1	1	0	0	3	1	0
0	2	0	1	2	2	0	0	0	0	5	0	1	1	0	0	0	0	0	3	0	0	0	0	0	1	1	2	0	0	3	0	0	4	1	0	0	0	2	2	1	0	1	1	1	2	0	3	3	0
2	0	2	1	0	2	0	0	0	0	5	0	1	3	0	1	0	2	1	3	0	1	0	0	0	0	0	0	1	0	1	0	0	4	0	0	0	1	2	3	2	0	1	1	1	2	2	1	2	2
1	0	0	1	0	3	0	0	0	0	5	3	1	1	0	0	2	1	1	1	0	2	0	0	0	0	1	0	0	0	3	0	0	3	1	0	0	0	2	2	1	0	1	0	3	0	0	3	1	0
1	2	0	1	2	2	0	0	0	0	5	1	1	1	0	0	0	0	0	3	0	0	0	0	0	1	1	2	0	0	3	0	0	4	2	0	0	0	2	2	0	0	1	0	1	2	0	3	3	0
0	0	0	1	0	2	0	0	0	0	4	0	1	0	0	0	0	2	1	1	0	0	0	0	0	0	1	0	0	0	0	0	0	3	0	0	0	2	3	2	3	0	1	2	1	0	0	3	0	0
2	0	0	1	0	2	0	0	0	0	3	0	1	1	0	0	0	2	1	1	0	0	1	0	0	0	0	0	1	0	1	2	0	4	1	0	0	1	2	2	1	0	1	0	1	0	0	1	0	0
2	0	0	1	0	2	0	0	0	0	3	0	1	0	0	0	0	2	1	1	0	0	1	0	0	0	1	0	0	0	0	2	0	4	1	0	0	0	2	2	1	0	1	1	1	0	0	1	0	0
0	0	0	1	0	4	0	0	0	0	4	2	1	0	0	0	2	2	1	1	0	2	1	0	0	2	1	0	0	0	2	0	0	1	0	0	1	0	0	2	1	0	1	2	3	0	0	4	0	1
0	0	0	1	0	4	1	0	0	0	3	2	1	0	0	0	2	2	0	1	0	0	0	1	0	2	1	0	0	0	2	0	0	1	0	0	1	0	1	2	1	0	1	2	1	2	0	3	1	0
0	1	0	1	0	3	1	0	1	1	4	1	3	1	0	0	0	2	0	3	0	0	0	1	0	2	1	0	0	0	3	0	0	1	0	0	1	0	1	3	1	3	2	1	1	3	0	3	2	0
1	0	0	1	0	4	0	0	0	0	4	3	1	1	0	0	2	2	1	1	0	2	1	0	0	2	0	0	1	0	3	0	0	1	1	0	1	1	0	2	0	0	1	0	3	0	0	4	0	1
0	0	0	1	0	4	1	2	2	0	3	1	1	0	0	0	0	2	0	1	0	0	1	1	0	2	1	2	0	0	2	0	0	1	1	0	3	0	1	2	0	0	1	1	1	2	0	3	1	0
2	1	0	1	0	3	0	0	1	1	2	0	1	3	0	0	0	3	1	1	0	0	2	0	0	2	1	0	0	0	1	0	0	3	1	0	1	0	0	2	0	1	0	0	1	1	0	2	1	1
2	0	0	1	0	4	0	0	0	0	2	0	1	3	0	0	0	3	1	1	0	0	2	0	0	2	0	0	1	0	1	0	0	3	1	0	1	1	0	2	0	0	1	0	1	0	0	3	0	1
0	0	0	1	0	4	1	0	0	0	2	2	1	1	0	0	2	2	0	1	0	0	1	1	0	2	0	0	1	0	3	0	0	1	1	0	1	1	1	2	0	0	1	0	1	2	0	3	1	0
1	0	0	1	0	3	0	0	0	0	4	2	1	1	0	0	2	0	1	2	0	2	0	0	0	0	1	0	0	0	3	0	0	2	0	0	0	0	0	2	1	0	2	1	3	0	0	3	1	0
3	2	0	1	0	4	0	0	0	0	4	1	1	0	0	0	0	1	0	1	0	0	0	0	0	1	1	2	0	0	0	0	0	3	1	0	0	0	0	3	0	0	3	1	1	0	0	4	0	0
1	0	1	1	0	4	0	1	0	0	4	1	1	1	0	0	0	2	0	1	0	0	0	0	0	0	0	0	2	0	1	0	0	1	1	0	0	3	2	2	0	0	3	0	1	0	0	4	0	0
3	0	2	1	0	4	0	0	0	0	4	1	1	2	0	1	0	1	1	3	0	1	0	0	0	0	1	0	0	0	0	0	0	3	1	0	0	0	0	3	0	0	3	1	1	2	2	3	2	2
0	2	0	1	2	4	0	0	0	0	3	0	1	1	0	0	0	0	1	3	0	0	1	0	0	1	1	2	0	0	3	0	0	3	2	0	0	0	0	2	0	0	3	0	1	2	0	4	3	0
1	0	2	1	2	3	0	0	0	0	3	1	1	1	0	0	0	0	0	1	0	0	0	1	0	0	1	0	0	0	3	0	0	2	0	0	0	0	0	2	1	0	2	1	1	2	0	2	1	0
2	2	0	1	0	4	0	0	2	0	4	0	1	1	0	0	2	0	0	3	0	0	0	0	0	0	0	0	1	0	1	0	0	3	0	0	0	2	2	3	1	0	4	2	1	0	0	4	0	0
1	0	2	1	2	4	0	0	0	0	3	2	1	1	0	0	0	0	0	1	0	0	0	1	0	0	1	0	0	0	3	0	0	1	1	0	0	0	0	2	0	0	3	0	1	2	0	3	1	0
3	2	0	1	0	4	0	0	2	0	4	1	1	1	0	0	2	0	0	3	0	0	0	0	0	0	0	0	1	0	1	0	0	3	1	0	0	2	2	3	0	0	4	1	1	0	0	4	0	0
1	1	0	1	2	3	0	0	1	1	3	2	1	1	0	0	0	0	0	1	0	0	0	1	0	0	1	0	0	0	3	0	0	1	1	0	0	0	0	3	0	1	2	0	1	3	0	2	1	0
3	2	0	1	1	4	0	0	0	0	3	1	1	2	0	0	0	0	1	1	0	0	0	1	0	1	1	2	0	0	0	0	0	3	1	0	0	0	0	2	0	0	3	1	1	0	0	3	0	0
1	0	2	1	2	3	0	0	0	0	2	1	1	1	0	0	0	0	0	1	0	0	1	1	0	0	1	0	0	0	3	0	0	2	1	0	0	0	0	2	0	0	2	0	1	2	0	2	1	0
0	0	1	1	0	2	0	1	0	0	3	0	1	1	0	0	0	2	0	1	0	0	1	0	0	0	1	0	1	0	1	0	0	3	1	0	0	2	3	2	0	0	1	0	1	0	0	3	1	0
2	0	2	1	0	2	0	0	0	0	4	0	1	3	0	1	0	2	1	3	0	1	1	0	0	0	0	0	1	0	1	0	0	4	1	0	0	1	2	3	1	0	1	0	1	2	2	1	2	2
1	0	0	1	0	3	0	0	0	0	4	1	1	3	0	0	0	2	1	1	0	0	0	0	0	0	0	0	1	0	1	0	0	3	1	0	0	1	2	2	1	0	1	0	1	0	0	1	0	0
1	1	0	1	0	2	0	0	1	1	4	1	1	1	0	0	0	1	1	1	0	0	0	0	0	0	1	0	0	0	1	0	0	4	1	0	0	0	2	2	1	1	0	0	1	1	0	2	1	0
2	0	0	1	0	1	0	0	0	0	4	1	1	1	0	0	0	2	1	1	0	0	0	0	0	0	1	0	0	0	1	0	0	4	1	0	0	2	3	2	2	0	0	0	1	0	0	2	1	0
2	1	0	1	0	1	0	0	1	1	3	0	1	3	0	0	0	2	1	1	0	0	1	0	0	0	1	0	0	0	1	0	0	4	1	0	0	0	2	2	1	1	0	0	1	1	0	0	1	0
2	1	0	1	0	3	0	0	1	1	3	0	1	3	0	0	0	3	1	1	0	0	1	0	0	2	1	0	0	0	1	0	0	3	0	0	1	0	0	2	1	1	0	1	1	1	0	2	1	1
0	0	0	1	2	4	1	0	0	0	3	1	1	1	0	0	0	2	0	1	0	0	0	1	0	2	0	0	1	0	3	0	0	1	0	0	1	1	1	3	1	0	1	1	1	2	0	3	1	0
1	0	0	1	0	4	0	0	0	0	3	1	1	1	0	0	0	2	1	1	0	0	1	0	0	2	0	0	1	0	1	0	0	3	1	0	1	1	0	2	0	0	1	0	1	0	0	4	0	1
2	0	0	1	0	4	0	0	0	0	4	1	1	1	0	0	0	0	0	1	0	0	0	1	0	0	1	0	0	0	3	2	2	3	0	0	0	0	0	3	1	0	3	1	1	2	0	3	1	0
1	2	0	1	2	4	0	0	0	0	4	1	1	1	0	0	0	0	1	3	0	0	0	0	0	1	1	2	0	0	3	0	0	3	2	0	0	0	0	2	0	0	3	0	1	2	0	4	3	0
3	1	2	1	0	3	0	0	1	1	4	1	1	3	0	1	0	1	1	3	0	1	0	0	0	0	1	0	0	0	1	0	0	3	1	0	0	0	0	3	0	1	2	0	1	3	2	2	3	2
0	0	0	1	0	3	0	0	0	0	5	2	1	1	0	0	2	1	1	1	0	2	0	0	0	0	1	0	0	0	3	0	0	3	0	0	0	0	2	2	2	0	1	1	3	0	0	3	1	0
2	0	2	1	0	2	0	0	0	0	4	0	1	3	0	1	0	2	1	3	0	1	1	0	0	0	1	0	0	0	1	0	0	4	1	0	0	0	2	3	1	0	1	0	1	2	2	1	3	2
0	0	0	1	0	3	0	0	0	0	4	0	1	2	0	0	0	2	1	1	0	0	0	0	0	0	1	0	0	0	0	0	0	3	0	0	0	0	2	2	2	0	1	2	1	0	0	1	0	0
3	0	0	1	0	2	0	0	0	0	4	1	1	2	0	0	0	2	1	1	0	0	0	0	0	0	1	0	0	0	0	0	0	4	1	0	0	0	2	2	1	0	1	1	1	0	0	1	0	0
0	0	0	1	0	3	0	0	0	0	3	0	1	0	0	0	0	1	1	1	0	0	1	0	0	0	1	0	0	0	0	0	0	4	1	0	0	0	2	2	1	0	1	1	1	0	0	3	0	0
0	0	0	1	0	4	0	0	0	0	3	0	1	1	0	0	0	2	1	1	0	0	1	0	0	2	0	0	1	0	1	0	0	3	0	0	1	1	0	2	1	0	1	1	1	0	0	4	0	1
0	1	0	1	2	3	1	0	1	1	3	1	1	1	0	0	0	2	0	1	0	0	0	1	0	2	1	0	0	0	3	0	0	1	0	0	1	0	1	3	1	1	0	1	1	3	0	2	2	0
2	2	1	1	1	4	1	0	0	0	3	0	1	2	0	0	0	2	0	1	0	0	0	1	0	3	1	2	0	0	0	0	0	3	0	0	1	0	0	2	1	0	1	2	1	0	0	3	0	0
1	1	1	1	0	3	0	1	1	1	3	1	1	1	0	0	0	3	0	1	0	0	1	0	0	2	1	0	1	0	1	0	0	1	1	0	1	2	2	2	0	1	0	0	1	1	0	3	1	0
4	2	1	1	1	3	1	0	0	0	3	1	1	3	0	0	0	2	0	1	0	0	0	1	0	3	1	2	0	0	1	0	0	4	1	0	1	0	0	2	0	0	0	0	1	0	0	2	1	0
0	0	1	1	0	4	0	1	0	0	4	0	1	0	0	0	0	2	0	1	0	0	0	0	0	0	1	0	1	0	0	0	0	1	0	0	0	2	2	2	1	0	3	2	1	0	0	4	0	0
3	0	2	1	0	3	0	0	0	0	4	0	1	3	0	1	0	1	1	3	0	1	0	0	0	0	1	0	0	0	1	0	0	4	0	0	0	0	0	3	1	0	2	1	1	2	2	2	3	2
0	1	0	1	0	3	0	0	1	1	3	2	1	1	0	0	2	0	1	2	0	2	1	0	0	0	1	0	0	0	3	0	0	1	1	0	0	0	0	2	0	1	2	0	3	1	0	3	1	0
0	0	0	1	0	4	0	0	0	0	3	2	1	1	0	0	2	0	1	2	0	2	1	0	0	0	0	0	1	0	3	0	0	1	1	0	0	1	0	2	0	0	3	0	3	0	0	4	0	0
2	2	0	1	0	4	0	0	2	0	3	0	1	0	0	0	2	0	0	3	0	0	1	0	0	0	1	0	0	0	0	0	0	3	1	0	0	1	2	3	0	0	4	2	1	0	0	4	0	0
2	0	0	1	0	2	0	0	0	0	5	1	1	1	0	0	0	0	0	1	0	0	0	1	0	0	1	0	0	0	3	2	2	4	0	0	0	0	2	3	1	0	1	1	1	2	0	1	1	0
0	0	0	1	0	3	0	0	0	0	5	2	1	1	0	0	2	1	1	1	0	2	0	0	0	0	0	0	1	0	3	0	0	3	0	0	0	1	2	2	2	0	1	1	3	0	0	3	0	0
0	0	0	1	0	3	0	0	0	0	5	2	1	0	0	0	2	1	1	1	0	2	0	0	0	0	1	0	0	0	2	0	0	3	0	0	0	0	2	2	2	0	1	2	3	0	0	3	0	0
3	0	0	1	0	2	0	0	0	0	5	2	1	1	0	0	0	0	0	1	0	0	0	1	0	0	0	0	1	0	3	2	2	4	1	0	0	1	2	3	0	0	1	0	1	2	0	1	0	0
3	0	0	1	0	2	0	0	0	0	5	2	1	0	0	0	0	0	0	1	0	0	0	1	0	0	1	0	0	0	2	2	2	4	1	0	0	0	2	3	0	0	1	1	1	2	0	1	0	0
0	2	0	1	2	2	0	0	0	0	4	0	1	0	0	0	0	0	0	3	0	0	1	0	0	1	1	2	0	0	2	0	0	4	2	0	0	0	2	2	0	0	1	1	1	2	0	3	2	0
0	1	0	1	0	2	0	0	1	1	4	0	1	1	0	0	0	1	1	1	0	0	0	0	0	0	1	0	0	0	1	0	0	4	0	0	0	0	2	2	2	1	0	1	1	1	0	2	1	0
1	0	0	1	0	3	0	0	0	0	4	1	1	3	0	0	0	2	1	1	0	0	0	0	0	0	1	0	0	0	1	0	0	3	1	0	0	0	2	2	1	0	1	0	1	0	0	1	1	0
2	0	0	1	0	2	0	0	0	0	4	1	1	3	0	0	0	2	1	1	0	0	0	0	0	0	1	0	0	0	1	0	0	4	1	0	0	0	2	2	1	0	0	0	1	0	0	0	1	0
3	0	0	1	0	1	0	0	0	0	3	0	1	1	0	0	0	2	1	1	0	0	1	0	0	0	1	0	0	0	1	2	0	5	1	0	0	0	2	2	1	0	0	0	1	0	0	0	1	0
0	1	1	1	0	3	0	1	1	1	3	0	1	1	0	0	0	3	0	1	0	0	1	0	0	2	1	0	1	0	1	0	0	1	0	0	1	2	2	2	1	1	0	1	1	1	0	3	1	0
0	0	0	1	0	4	0	0	0	0	4	2	1	1	0	0	2	2	1	1	0	2	1	0	0	2	1	0	0	0	3	0	0	1	0	0	1	0	0	2	1	0	1	1	3	0	0	4	1	1
0	1	1	1	2	3	0	0	1	1	4	1	1	1	0	0	0	2	0	2	0	0	0	1	0	2	1	0	0	0	3	0	0	1	0	0	3	0	0	2	2	1	0	1	3	1	0	3	2	0
3	0	0	1	0	4	0	0	0	0	3	1	1	2	0	0	0	3	1	1	0	0	1	0	0	2	1	0	0	0	0	0	0	3	1	0	1	0	0	2	0	0	1	1	1	0	0	3	0	1
1	1	0	1	0	3	1	0	1	1	3	3	1	1	0	0	2	2	0	1	0	0	0	1	0	2	1	0	0	0	3	0	0	1	1	0	1	0	1	2	0	1	0	0	1	3	0	2	2	0
2	0	0	1	2	3	1	0	0	0	3	2	1	1	0	0	0	2	0	1	0	0	0	1	0	2	1	0	0	0	3	0	0	2	1	0	1	0	1	3	0	0	0	0	1	2	0	2	2	0
1	0	0	1	2	4	1	0	0	0	3	2	1	0	0	0	0	2	0	1	0	0	0	1	0	2	1	0	0	0	2	0	0	1	1	0	1	0	1	3	0	0	1	1	1	2	0	3	1	0
1	0	1	1	0	3	0	1	0	0	2	0	1	1	0	0	0	3	0	1	0	0	2	0	0	2	1	0	1	0	1	0	0	2	1	0	1	2	2	2	0	0	0	0	1	0	0	3	1	0
2	2	0	1	0	4	0	0	2	0	3	0	1	1	0	0	2	2	0	3	0	0	2	0	0	2	1	0	0	0	1	0	0	3	1	0	1	1	2	3	1	0	3	1	1	0	0	4	1	0
0	1	1	1	0	3	0	1	1	1	4	0	1	1	0	0	0	2	0	1	0	0	0	0	0	0	1	0	1	0	1	0	0	1	0	0	0	2	2	2	1	1	2	1	1	1	0	3	1	0
2	0	2	1	0	4	0	0	0	0	3	0	1	2	0	1	0	1	1	3	0	1	1	0	0	0	1	0	0	0	0	0	0	3	1	0	0	0	0	3	0	0	3	1	1	2	2	3	2	2
0	0	0	1	2	4	0	0	0	0	2	1	1	1	0	0	0	0	0	1	0	0	1	1	0	0	0	0	1	0	3	0	0	1	1	0	0	1	0	3	0	0	3	0	1	2	0	3	0	0
3	2	0	1	0	1	0	0	0	0	5	0	1	1	0	0	0	1	0	1	0	0	0	0	0	1	1	2	0	0	1	0	0	5	0	0	1	0	2	3	1	0	0	1	1	0	0	2	1	0
0	0	1	1	0	2	0	1	0	0	4	0	1	1	0	0	0	2	0	1	0	0	0	0	0	0	1	0	1	0	1	0	0	3	0	0	0	2	3	2	1	0	1	1	1	0	0	3	1	0
0	2	0	1	2	2	0	0	0	0	5	0	1	0	0	0	0	0	0	3	0	0	0	0	0	1	1	2	0	0	2	0	0	4	1	0	0	0	2	2	1	0	1	2	1	2	0	3	2	0
3	1	2	1	0	1	0	0	1	1	5	1	1	3	0	1	0	2	1	3	0	1	0	0	0	0	1	0	0	0	1	0	0	4	1	0	0	0	2	3	1	1	0	0	1	3	2	0	3	2
1	0	0	1	0	2	0	0	0	0	4	0	1	3	0	0	0	2	1	1	0	0	0	0	0	0	1	0	0	0	1	0	0	4	0	0	0	0	2	2	2	0	0	1	1	0	0	0	1	0
3	0	0	1	0	2	0	0	0	0	4	1	1	3	0	0	0	2	1	1	0	0	0	0	0	0	1	0	0	0	1	0	0	4	1	0	0	0	2	2	1	0	1	0	1	0	0	1	1	0
0	0	0	1	0	3	0	0	0	0	3	0	1	1	0	0	0	1	1	1	0	0	1	0	0	0	0	0	1	0	1	0	0	4	1	0	0	1	2	2	1	0	1	0	1	0	0	3	0	0
0	1	0	1	0	3	0	0	1	1	3	0	1	3	0	0	0	3	1	1	0	0	1	0	0	2	1	0	0	0	1	0	0	1	0	0	1	0	0	2	1	1	0	1	1	1	0	2	1	1
2	0	0	1	0	4	0	0	0	0	3	0	1	2	0	0	0	3	1	1	0	0	1	0	0	2	1	0	0	0	0	0	0	3	0	0	1	0	0	2	1	0	1	2	1	0	0	3	0	1
0	0	0	1	0	4	1	0	0	0	4	1	3	0	0	0	0	2	0	3	0	0	0	1	0	2	1	0	0	0	2	0	0	1	0	0	1	0	1	3	1	2	3	2	1	2	0	4	1	0
2	2	0	1	0	4	0	0	2	0	4	0	1	1	0	0	2	2	0	3	0	0	1	0	0	2	1	0	0	0	1	0	0	3	0	0	1	1	2	3	2	0	3	2	1	0	0	4	1	0
3	0	0	1	0	4	1	0	0	0	4	2	1	1	0	0	0	2	0	1	0	0	0	1	0	2	1	0	0	0	3	2	2	3	1	0	1	0	1	3	0	0	1	0	1	2	0	3	2	0
1	0	1	1	0	4	0	1	0	0	3	1	1	0	0	0	0	2	0	1	0	2	1	0	0	2	1	0	1	0	0	0	0	1	1	0	1	0	0	2	0	0	3	1	1	0	0	4	0	0
1	0	0	1	0	4	0	0	0	0	3	1	1	2	0	0	0	3	1	1	0	0	1	0	0	2	1	0	0	0	0	0	0	1	1	0	1	0	0	2	0	0	1	1	1	0	0	3	0	1
1	1	0	1	0	3	1	0	1	1	4	2	3	1	0	0	0	2	0	3	0	0	0	1	0	2	1	0	0	0	3	0	0	1	1	0	1	0	1	3	0	3	2	0	1	3	0	3	2	0
1	0	1	1	2	4	0	0	0	0	4	2	1	1	0	0	0	2	0	2	0	0	0	1	0	2	0	0	1	0	3	0	0	1	1	0	3	1	0	2	1	0	1	0	3	0	0	4	1	0
0	0	0	1	0	4	0	0	0	0	3	2	1	1	0	0	2	2	1	1	0	2	2	0	0	2	1	0	0	0	3	0	0	1	1	0	1	0	0	2	0	0	1	0	3	0	0	4	1	1
2	0	0	1	0	4	0	0	0	0	2	0	1	1	0	0	0	3	1	1	0	0	2	0	0	2	1	0	0	0	1	2	0	3	1	0	1	0	0	2	0	0	1	0	1	0	0	3	1	1
0	1	0	1	0	3	1	0	1	1	2	2	1	1	0	0	2	2	0	1	0	0	1	1	0	2	1	0	0	0	3	0	0	1	1	0	1	0	1	2	0	1	0	0	1	3	0	2	2	0
1	0	0	1	0	3	1	0	0	0	3	1	3	1	0	0	0	2	0	3	0	0	1	1	0	2	1	0	0	0	3	0	0	2	1	0	1	0	1	3	0	2	2	0	1	2	0	3	2	0
0	0	0	1	2	4	1	0	0	0	2	1	1	0	0	0	0	2	0	1	0	0	1	1	0	2	1	0	0	0	2	0	0	1	1	0	1	0	1	3	0	0	1	1	1	2	0	3	1	0
0	2	0	1	2	4	0	0	0	0	4	0	1	1	0	0	0	0	1	3	0	0	0	0	0	1	0	2	1	0	3	0	0	3	1	0	0	1	0	2	1	0	3	1	1	2	0	4	2	0
4	2	0	1	0	3	0	0	0	0	4	1	1	1	0	0	0	1	0	1	0	0	0	0	0	1	1	2	0	0	1	0	0	4	1	0	0	0	0	3	0	0	2	0	1	0	0	3	1	0
2	0	0	1	0	4	0	0	0	0	3	1	1	0	0	0	0	0	0	1	0	0	1	1	0	0	1	0	0	0	2	2	2	3	1	0	0	0	0	3	0	0	3	1	1	2	0	3	0	0
2	2	0	1	1	4	0	0	0	0	3	0	1	3	0	0	0	0	1	1	0	0	0	1	0	1	1	2	0	0	1	0	0	3	0	0	0	0	0	2	1	0	3	1	1	0	0	3	1	0
2	0	0	1	0	3	0	0	0	0	4	2	3	1	0	0	0	0	0	3	0	0	0	1	0	0	1	0	0	0	3	0	0	2	1	0	0	0	0	3	0	2	3	0	1	2	0	3	1	0
1	0	0	1	2	4	0	0	0	0	3	2	1	0	0	0	0	0	0	1	0	0	0	1	0	0	1	0	0	0	2	0	0	1	1	0	0	0	0	3	0	0	3	1	1	2	0	3	0	0
1	2	0	1	2	2	0	0	0	0	5	1	1	1	0	0	0	0	0	3	0	0	0	0	0	1	0	2	1	0	3	0	0	4	2	0	0	1	2	2	0	0	1	0	1	2	0	3	2	0
3	2	0	1	0	1	0	0	0	0	4	0	1	1	0	0	0	1	0	1	0	0	1	0	0	1	1	2	0	0	1	0	0	5	1	0	1	0	2	3	0	0	0	0	1	0	0	2	1	0
2	0	0	1	0	2	0	0	0	0	4	0	1	0	0	0	0	2	1	1	0	0	0	0	0	0	1	0	0	0	0	2	0	4	0	0	0	0	2	2	2	0	1	2	1	0	0	1	0	0
1	0	0	1	0	2	0	0	0	0	4	1	1	1	0	0	0	2	1	1	0	0	0	0	0	0	1	0	0	0	1	0	0	3	1	0	0	2	3	2	2	0	1	0	1	0	0	3	1	0
2	2	1	1	1	4	1	0	0	0	3	0	1	3	0	0	0	2	0	1	0	0	0	1	0	3	1	2	0	0	1	0	0	3	0	0	1	0	0	2	1	0	1	1	1	0	0	3	1	0
4	0	2	1	0	3	0	0	0	0	4	1	1	3	0	1	0	3	1	3	0	0	1	0	0	2	1	0	0	0	1	0	0	4	1	0	1	0	0	3	0	0	0	0	1	2	2	2	3	2
1	1	0	1	0	3	0	0	1	1	3	1	1	3	0	0	0	3	1	1	0	0	1	0	0	2	1	0	0	0	1	0	0	1	1	0	1	0	0	2	0	1	0	0	1	1	0	2	1	1
3	0	0	1	0	4	0	0	0	0	3	1	1	3	0	0	0	3	1	1	0	0	1	0	0	2	1	0	0	0	1	0	0	3	1	0	1	0	0	2	0	0	1	0	1	0	0	3	1	1
1	0	0	1	0	4	1	0	0	0	4	2	3	1	0	0	0	2	0	3	0	0	0	1	0	2	0	0	1	0	3	0	0	1	1	0	1	1	1	3	0	2	3	0	1	2	0	4	1	0
0	1	1	1	0	3	0	1	1	1	2	0	1	1	0	0	0	2	0	1	0	2	2	0	0	2	1	0	1	0	1	0	0	1	1	0	1	0	0	2	0	1	2	0	1	1	0	3	1	0
0	0	0	1	0	4	0	0	0	0	2	0	1	3	0	0	0	3	1	1	0	0	2	0	0	2	1	0	0	0	1	0	0	1	1	0	1	0	0	2	0	0	1	0	1	0	0	3	1	1
3	2	1	1	1	3	1	0	0	0	2	0	1	3	0	0	0	2	0	1	0	0	1	1	0	3	1	2	0	0	1	0	0	4	1	0	1	0	0	2	0	0	0	0	1	0	0	2	1	0
0	0	1	1	0	4	0	1	0	0	4	0	1	1	0	0	0	2	0	1	0	0	0	0	0	0	0	0	2	0	1	0	0	1	0	0	0	3	2	2	1	0	3	1	1	0	0	4	0	0
2	0	0	1	0	4	0	0	0	0	4	1	1	0	0	0	0	0	0	1	0	0	0	1	0	0	1	0	0	0	2	2	2	3	0	0	0	0	0	3	1	0	3	2	1	2	0	3	0	0
3	0	0	1	0	4	0	0	0	0	4	2	1	0	0	0	0	0	0	1	0	0	0	1	0	0	1	0	0	0	2	2	2	3	1	0	0	0	0	3	0	0	3	1	1	2	0	3	0	0
2	2	0	1	0	4	0	0	0	0	3	0	1	1	0	0	0	1	0	1	0	0	1	0	0	1	0	2	1	0	1	0	0	3	1	0	0	1	0	3	0	0	3	0	1	0	0	4	0	0
3	3	0	1	0	3	0	0	3	1	4	1	1	1	0	0	2	0	0	3	0	0	0	0	0	0	1	0	0	0	1	0	0	3	1	0	0	1	2	3	0	1	3	1	1	1	0	3	1	0
4	2	0	1	1	3	0	0	0	0	3	1	1	3	0	0	0	0	1	1	0	0	0	1	0	1	1	2	0	0	1	0	0	4	1	0	0	0	0	2	0	0	2	0	1	0	0	2	1	0
0	0	0	1	2	4	0	0	0	0	2	1	1	0	0	0	0	0	0	1	0	0	1	1	0	0	1	0	0	0	2	0	0	1	1	0	0	0	0	3	0	0	3	1	1	2	0	3	0	0
1	0	0	1	0	3	0	0	0	0	5	3	1	0	0	0	2	1	1	1	0	2	0	0	0	0	1	0	0	0	2	0	0	3	1	0	0	0	2	2	1	0	1	1	3	0	0	3	0	0
2	0	0	1	0	2	0	0	0	0	4	1	1	1	0	0	0	0	0	1	0	0	1	1	0	0	1	0	0	0	3	2	2	4	1	0	0	0	2	3	0	0	1	0	1	2	0	1	1	0
2	1	0	1	0	1	0	0	1	1	4	1	1	1	0	0	0	0	0	1	0	0	1	1	0	0	1	0	0	0	3	2	2	4	1	0	0	0	2	3	0	1	0	0	1	3	0	0	1	0
0	0	0	1	0	3	0	0	0	0	4	0	1	1	0	0	0	1	1	1	0	0	0	0	0	0	1	0	0	0	1	0	0	4	0	0	0	0	2	2	2	0	1	1	1	0	0	3	1	0
0	0	0	1	0	3	0	0	0	0	4	0	1	0	0	0	0	1	1	1	0	0	0	0	0	0	1	0	0	0	0	0	0	4	0	0	0	0	2	2	2	0	1	2	1	0	0	3	0	0
0	0	0	1	0	3	0	0	0	0	3	0	1	2	0	0	0	2	1	1	0	0	1	0	0	0	1	0	0	0	0	0	0	3	1	0	0	0	2	2	1	0	1	1	1	0	0	1	0	0
2	0	0	1	0	2	0	0	0	0	3	0	1	3	0	0	0	2	1	1	0	0	1	0	0	0	1	0	0	0	1	0	0	4	1	0	0	0	2	2	1	0	1	0	1	0	0	1	1	0
0	0	0	1	0	4	0	0	0	0	3	0	1	3	0	0	0	3	1	1	0	0	1	0	0	2	1	0	0	0	1	0	0	1	0	0	1	0	0	2	1	0	1	1	1	0	0	3	1	1
2	0	0	1	0	4	0	0	0	0	3	0	1	3	0	0	0	3	1	1	0	0	1	0	0	2	0	0	1	0	1	0	0	3	0	0	1	1	0	2	1	0	1	1	1	0	0	3	0	1
3	0	0	1	0	4	1	0	0	0	4	2	1	1	0	0	0	2	0	1	0	0	0	1	0	2	0	0	1	0	3	2	2	3	1	0	1	1	1	3	0	0	1	0	1	2	0	3	1	0
1	0	0	1	0	4	1	2	2	0	4	2	1	1	0	0	0	2	0	1	0	0	0	1	0	2	0	2	1	0	3	0	0	1	1	0	3	1	1	2	0	0	1	0	1	2	0	3	1	0
2	0	0	1	0	3	0	0	0	0	3	1	1	3	0	0	0	3	1	1	0	0	1	0	0	2	1	0	0	0	1	0	0	2	1	0	1	0	0	2	0	0	0	0	1	0	0	2	1	1
3	2	1	1	1	4	1	0	0	0	3	1	1	3	0	0	0	2	0	1	0	0	0	1	0	3	0	2	1	0	1	0	0	3	1	0	1	1	0	2	0	0	1	0	1	0	0	3	0	0
2	0	2	1	0	4	0	0	0	0	3	0	1	2	0	1	0	3	1	3	0	0	2	0	0	2	1	0	0	0	0	0	0	3	1	0	1	0	0	3	0	0	1	1	1	2	2	3	2	2
2	2	1	1	1	4	1	0	0	0	2	0	1	3	0	0	0	2	0	1	0	0	1	1	0	3	1	2	0	0	1	0	0	3	1	0	1	0	0	2	0	0	1	0	1	0	0	3	1	0
2	2	1	1	1	4	1	0	0	0	2	0	1	3	0	0	0	2	0	1	0	0	1	1	0	3	0	2	1	0	1	0	0	3	1	0	1	1	0	2	0	0	1	0	1	0	0	3	0	0
3	2	0	1	0	3	0	0	0	0	3	0	1	1	0	0	0	1	0	1	0	0	1	0	0	1	1	2	0	0	1	0	0	4	1	0	0	0	0	3	0	0	2	0	1	0	0	3	1	0
0	0	0	1	2	4	0	0	0	0	3	1	1	1	0	0	0	0	0	1	0	0	0	1	0	0	1	0	0	0	3	0	0	1	0	0	0	0	0	3	1	0	3	1	1	2	0	3	1	0
2	2	0	1	0	4	0	0	2	0	3	0	1	1	0	0	2	0	0	3	0	0	1	0	0	0	1	0	0	0	1	0	0	3	1	0	0	1	2	3	0	0	4	1	1	0	0	4	1	0
4	0	2	1	0	1	0	0	0	0	5	1	1	3	0	1	0	2	1	3	0	1	0	0	0	0	1	0	0	0	1	0	0	5	1	0	0	0	2	3	1	0	0	0	1	2	2	0	3	2
1	0	0	1	0	2	0	0	0	0	4	2	1	1	0	0	2	1	1	1	0	2	1	0	0	0	1	0	0	0	3	0	0	4	1	0	0	0	2	2	1	0	0	0	3	0	0	2	1	0
2	0	0	1	0	2	0	0	0	0	4	0	1	2	0	0	0	2	1	1	0	0	0	0	0	0	1	0	0	0	0	0	0	4	0	0	0	0	2	2	2	0	1	2	1	0	0	1	0	0
2	0	0	1	0	2	0	0	0	0	4	1	1	1	0	0	0	1	1	1	0	0	0	0	0	0	1	0	0	0	1	0	0	5	1	0	0	0	2	2	1	0	0	0	1	0	0	2	1	0
1	1	0	1	0	1	0	0	1	1	4	1	1	1	0	0	0	2	1	1	0	0	0	0	0	0	1	0	0	0	1	0	0	3	1	0	0	2	3	2	2	1	0	0	1	1	0	2	1	0
1	0	0	1	0	2	0	0	0	0	4	1	1	0	0	0	0	2	1	1	0	0	0	0	0	0	1	0	0	0	0	0	0	3	1	0	0	2	3	2	2	0	1	1	1	0	0	3	0	0
0	0	0	1	0	3	0	0	0	0	3	0	1	3	0	0	0	2	1	1	0	0	1	0	0	0	1	0	0	0	1	0	0	3	1	0	0	0	2	2	1	0	1	0	1	0	0	1	1	0
0	1	0	1	0	1	0	0	1	1	3	0	1	1	0	0	0	2	1	1	0	0	1	0	0	0	1	0	0	0	1	0	0	3	1	0	0	2	3	2	2	1	0	0	1	1	0	2	1	0
0	0	0	1	0	2	0	0	0	0	3	0	1	0	0	0	0	2	1	1	0	0	1	0	0	0	1	0	0	0	0	0	0	3	1	0	0	2	3	2	2	0	1	1	1	0	0	3	0	0
2	1	2	1	0	3	0	0	1	1	4	0	1	3	0	1	0	3	1	3	0	0	1	0	0	2	1	0	0	0	1	0	0	3	0	0	1	0	0	3	1	1	0	1	1	3	2	2	3	2
2	0	0	1	0	4	0	0	0	0	3	0	1	3	0	0	0	3	1	1	0	0	1	0	0	2	1	0	0	0	1	0	0	3	0	0	1	0	0	2	1	0	1	1	1	0	0	3	1	1
0	1	0	1	0	3	0	0	1	1	3	0	1	1	0	0	0	2	1	1	0	0	1	0	0	2	1	0	0	0	1	0	0	3	0	0	1	0	0	2	1	1	0	1	1	1	0	3	1	1
1	0	1	1	0	4	0	1	0	0	3	1	1	1	0	0	0	3	0	1	0	0	1	0	0	2	0	0	2	0	1	0	0	1	1	0	1	3	2	2	0	0	1	0	1	0	0	4	0	0
3	2	0	1	0	4	0	0	2	0	4	1	1	1	0	0	2	2	0	3	0	0	1	0	0	2	1	0	0	0	1	0	0	3	1	0	1	1	2	3	1	0	3	1	1	0	0	4	1	0
0	1	0	1	0	3	1	2	3	1	3	1	1	1	0	0	0	2	0	1	0	0	1	1	0	2	1	2	0	0	3	0	0	1	1	0	3	0	1	2	0	1	0	0	1	3	0	2	2	0
0	2	1	1	2	4	1	0	0	0	3	0	1	0	0	0	0	2	0	3	0	0	1	0	0	3	1	2	0	0	2	0	0	3	2	0	1	0	0	2	0	0	1	1	1	2	0	4	2	0
2	2	0	1	0	4	0	0	0	0	4	0	1	1	0	0	0	1	0	1	0	0	0	0	0	1	0	2	1	0	1	0	0	3	0	0	0	1	0	3	1	0	3	1	1	0	0	4	0	0
2	0	2	1	0	4	0	0	0	0	4	0	1	2	0	1	0	1	1	3	0	1	0	0	0	0	1	0	0	0	0	0	0	3	0	0	0	0	0	3	1	0	3	2	1	2	2	3	2	2
3	0	2	1	0	4	0	0	0	0	4	1	1	3	0	1	0	1	1	3	0	1	0	0	0	0	1	0	0	0	1	0	0	3	1	0	0	0	0	3	0	0	3	0	1	2	2	3	3	2
3	0	0	1	0	3	0	0	0	0	3	1	1	1	0	0	0	0	0	1	0	0	1	1	0	0	1	0	0	0	3	2	2	4	1	0	0	0	0	3	0	0	2	0	1	2	0	2	1	0
2	3	0	1	0	3	0	0	3	1	4	0	1	1	0	0	2	0	0	3	0	0	0	0	0	0	1	0	0	0	1	0	0	3	0	0	0	1	2	3	1	1	3	2	1	1	0	3	1	0
0	0	0	1	0	4	0	0	0	0	3	1	3	1	0	0	0	0	0	3	0	0	1	1	0	0	0	0	1	0	3	0	0	1	1	0	0	1	0	3	0	2	4	0	1	2	0	4	0	0
0	0	0	1	0	4	0	0	0	0	3	1	3	0	0	0	0	0	0	3	0	0	1	1	0	0	1	0	0	0	2	0	0	1	1	0	0	0	0	3	0	2	4	1	1	2	0	4	0	0
3	2	0	1	1	3	0	0	0	0	2	0	1	3	0	0	0	0	1	1	0	0	1	1	0	1	1	2	0	0	1	0	0	4	1	0	0	0	0	2	0	0	2	0	1	0	0	2	1	0
3	2	0	1	0	2	0	0	0	0	5	1	1	1	0	0	0	1	0	1	0	0	0	0	0	1	0	2	1	0	1	0	0	4	1	0	1	1	2	3	0	0	1	0	1	0	0	3	0	0
2	0	0	1	0	2	0	0	0	0	5	3	1	1	0	0	2	1	1	1	0	2	0	0	0	0	1	0	0	0	3	0	0	4	1	0	0	0	2	2	1	0	0	0	3	0	0	2	1	0
0	1	0	1	0	2	0	0	1	1	4	2	1	1	0	0	2	1	1	1	0	2	1	0	0	0	1	0	0	0	3	0	0	3	1	0	0	0	2	2	1	1	0	0	3	1	0	2	1	0
0	0	0	1	0	3	0	0	0	0	4	0	1	3	0	0	0	2	1	1	0	0	0	0	0	0	0	0	1	0	1	0	0	3	0	0	0	1	2	2	2	0	1	1	1	0	0	1	0	0
1	0	0	1	0	2	0	0	0	0	4	1	1	1	0	0	0	2	1	1	0	0	0	0	0	0	0	0	1	0	1	0	0	3	1	0	0	3	3	2	2	0	1	0	1	0	0	3	0	0
0	0	0	1	0	2	0	0	0	0	3	0	1	1	0	0	0	2	1	1	0	0	1	0	0	0	0	0	1	0	1	0	0	3	1	0	0	3	3	2	2	0	1	0	1	0	0	3	0	0
1	0	0	1	0	3	0	0	0	0	3	0	1	3	0	0	0	3	1	1	0	0	1	0	0	2	1	0	0	0	1	0	0	2	0	0	1	0	0	2	1	0	0	1	1	0	0	2	1	1
2	0	0	1	0	4	1	0	0	0	4	1	1	1	0	0	0	2	0	1	0	0	0	1	0	2	1	0	0	0	3	2	2	3	0	0	1	0	1	3	1	0	1	1	1	2	0	3	2	0
3	0	0	1	0	3	1	0	0	0	4	1	1	1	0	0	0	2	0	1	0	0	0	1	0	2	1	0	0	0	3	2	2	4	0	0	1	0	1	3	1	0	0	1	1	2	0	2	2	0
2	0	0	1	0	3	1	2	2	0	4	2	1	1	0	0	0	2	0	1	0	0	0	1	0	2	1	2	0	0	3	0	0	2	1	0	3	0	1	2	0	0	0	0	1	2	0	2	2	0
1	1	0	1	2	3	1	0	1	1	3	2	1	1	0	0	0	2	0	1	0	0	0	1	0	2	1	0	0	0	3	0	0	1	1	0	1	0	1	3	0	1	0	0	1	3	0	2	2	0
2	0	1	1	2	3	0	0	0	0	4	2	1	1	0	0	0	2	0	2	0	0	0	1	0	2	1	0	0	0	3	0	0	2	1	0	3	0	0	2	1	0	0	0	3	0	0	3	2	0
0	1	0	1	0	3	1	0	1	1	3	1	3	1	0	0	0	2	0	3	0	0	1	1	0	2	1	0	0	0	3	0	0	1	1	0	1	0	1	3	0	3	2	0	1	3	0	3	2	0
3	2	0	1	0	3	0	0	2	0	3	0	1	1	0	0	2	2	0	3	0	0	2	0	0	2	1	0	0	0	1	0	0	4	1	0	1	1	2	3	1	0	2	1	1	0	0	3	1	0
2	2	0	1	0	4	0	0	2	0	3	0	1	0	0	0	2	2	0	3	0	0	2	0	0	2	1	0	0	0	0	0	0	3	1	0	1	1	2	3	1	0	3	2	1	0	0	4	0	0
3	2	0	1	0	4	0	0	0	0	4	1	1	1	0	0	0	1	0	1	0	0	0	0	0	1	1	2	0	0	1	0	0	3	1	0	0	0	0	3	0	0	3	0	1	0	0	4	1	0
1	0	0	1	0	4	0	0	0	0	4	3	1	1	0	0	2	0	1	2	0	2	0	0	0	0	0	0	1	0	3	0	0	1	1	0	0	1	0	2	0	0	3	0	3	0	0	4	0	0
4	0	2	1	0	3	0	0	0	0	4	1	1	3	0	1	0	1	1	3	0	1	0	0	0	0	1	0	0	0	1	0	0	4	1	0	0	0	0	3	0	0	2	0	1	2	2	2	3	2
2	3	0	1	0	3	0	0	1	1	3	0	1	1	0	0	0	1	0	1	0	0	1	0	0	1	1	2	0	0	1	0	0	3	1	0	0	0	0	3	0	1	2	0	1	1	0	3	1	0
2	0	0	1	0	4	0	0	0	0	3	1	1	1	0	0	0	0	0	1	0	0	1	1	0	0	0	0	1	0	3	2	2	3	1	0	0	1	0	3	0	0	3	0	1	2	0	3	0	0
2	2	0	1	1	4	0	0	0	0	3	0	1	3	0	0	0	0	1	1	0	0	0	1	0	1	0	2	1	0	1	0	0	3	0	0	0	1	0	2	1	0	3	1	1	0	0	3	0	0
0	0	2	1	2	4	0	0	0	0	2	1	1	1	0	0	0	0	0	1	0	0	1	1	0	0	1	0	0	0	3	0	0	1	1	0	0	0	0	2	0	0	3	0	1	2	0	3	1	0
0	0	0	1	2	4	0	0	0	0	2	1	1	1	0	0	0	0	0	1	0	0	1	1	0	0	1	0	0	0	3	0	0	1	1	0	0	0	0	3	0	0	3	0	1	2	0	3	1	0
2	2	0	1	1	4	0	0	0	0	2	0	1	3	0	0	0	0	1	1	0	0	1	1	0	1	1	2	0	0	1	0	0	3	1	0	0	0	0	2	0	0	3	0	1	0	0	3	1	0
1	0	1	1	0	1	0	1	0	0	4	0	1	1	0	0	0	2	0	1	0	0	0	0	0	0	1	0	1	0	1	0	0	4	0	0	0	2	3	2	1	0	0	1	1	0	0	2	1	0
0	0	1	1	0	2	0	1	0	0	3	0	1	0	0	0	0	2	0	1	0	0	1	0	0	0	1	0	1	0	0	0	0	3	1	0	0	2	3	2	0	0	1	1	1	0	0	3	0	0
0	0	0	1	0	3	0	0	0	0	4	2	1	1	0	0	2	1	1	1	0	2	1	0	0	0	0	0	1	0	3	0	0	3	1	0	0	1	2	2	1	0	1	0	3	0	0	3	0	0
0	0	0	1	0	3	0	0	0	0	4	2	1	0	0	0	2	1	1	1	0	2	1	0	0	0	1	0	0	0	2	0	0	3	1	0	0	0	2	2	1	0	1	1	3	0	0	3	0	0
2	0	0	1	0	2	0	0	0	0	4	0	1	3	0	0	0	2	1	1	0	0	0	0	0	0	1	0	0	0	1	0	0	4	0	0	0	0	2	2	2	0	1	1	1	0	0	1	1	0
0	0	0	1	0	2	0	0	0	0	4	0	1	1	0	0	0	2	1	1	0	0	0	0	0	0	1	0	0	0	1	0	0	3	0	0	0	2	3	2	3	0	1	1	1	0	0	3	1	0
2	0	2	1	0	4	0	0	0	0	4	0	1	3	0	1	0	3	1	3	0	0	1	0	0	2	0	0	1	0	1	0	0	3	0	0	1	1	0	3	1	0	1	1	1	2	2	3	2	2
1	0	0	1	0	3	0	0	0	0	3	0	1	1	0	0	0	2	1	1	0	0	1	0	0	2	1	0	0	0	1	0	0	4	0	0	1	0	0	2	1	0	0	1	1	0	0	3	1	1
0	0	0	1	2	4	1	0	0	0	3	1	1	0	0	0	0	2	0	1	0	0	0	1	0	2	1	0	0	0	2	0	0	1	0	0	1	0	1	3	1	0	1	2	1	2	0	3	1	0
1	2	1	1	2	4	1	0	0	0	4	1	1	1	0	0	0	2	0	3	0	0	0	0	0	3	0	2	1	0	3	0	0	3	2	0	1	1	0	2	0	0	1	0	1	2	0	4	2	0
4	2	0	1	0	3	0	0	2	0	4	1	1	1	0	0	2	2	0	3	0	0	1	0	0	2	1	0	0	0	1	0	0	4	1	0	1	1	2	3	1	0	2	1	1	0	0	3	1	0
3	2	1	1	1	4	1	0	0	0	3	1	1	2	0	0	0	2	0	1	0	0	0	1	0	3	1	2	0	0	0	0	0	3	1	0	1	0	0	2	0	0	1	1	1	0	0	3	0	0
2	2	0	1	0	4	0	0	0	0	4	0	1	1	0	0	0	1	0	1	0	0	0	0	0	1	1	2	0	0	1	0	0	3	0	0	0	0	0	3	1	0	3	1	1	0	0	4	1	0
3	2	0	1	0	3	0	0	0	0	4	0	1	1	0	0	0	1	0	1	0	0	0	0	0	1	1	2	0	0	1	0	0	4	0	0	0	0	0	3	1	0	2	1	1	0	0	3	1	0
2	1	0	1	0	3	0	0	1	1	4	1	1	1	0	0	0	0	0	1	0	0	0	1	0	0	1	0	0	0	3	2	2	3	0	0	0	0	0	3	1	1	2	1	1	3	0	2	1	0
0	0	0	1	0	4	0	0	0	0	4	2	1	1	0	0	2	0	1	2	0	2	0	0	0	0	1	0	0	0	3	0	0	1	0	0	0	0	0	2	1	0	3	1	3	0	0	4	1	0
1	3	0	1	2	3	0	0	1	1	4	1	1	1	0	0	0	0	1	3	0	0	0	0	0	1	1	2	0	0	3	0	0	3	2	0	0	0	0	2	0	1	2	0	1	3	0	3	3	0
0	1	2	1	2	3	0	0	1	1	3	1	1	1	0	0	0	0	0	1	0	0	0	1	0	0	1	0	0	0	3	0	0	1	0	0	0	0	0	2	1	1	2	1	1	3	0	2	1	0
0	0	0	1	2	4	0	0	0	0	3	1	1	1	0	0	0	0	0	1	0	0	0	1	0	0	0	0	1	0	3	0	0	1	0	0	0	1	0	3	1	0	3	1	1	2	0	3	0	0
1	0	0	1	0	4	0	0	0	0	4	2	3	1	0	0	0	0	0	3	0	0	0	1	0	0	1	0	0	0	3	0	0	1	1	0	0	0	0	3	0	2	4	0	1	2	0	4	1	0
1	0	0	1	2	4	0	0	0	0	3	2	1	1	0	0	0	0	0	1	0	0	0	1	0	0	1	0	0	0	3	0	0	1	1	0	0	0	0	3	0	0	3	0	1	2	0	3	1	0
0	1	0	1	0	3	0	0	1	1	3	1	3	1	0	0	0	0	0	3	0	0	1	1	0	0	1	0	0	0	3	0	0	1	1	0	0	0	0	3	0	3	3	0	1	3	0	3	1	0
2	3	0	1	0	3	0	0	3	1	3	0	1	1	0	0	2	0	0	3	0	0	1	0	0	0	1	0	0	0	1	0	0	3	1	0	0	1	2	3	0	1	3	1	1	1	0	3	1	0
1	2	0	1	2	1	0	0	0	0	5	0	1	1	0	0	0	0	0	3	0	0	0	0	0	1	1	2	0	0	3	0	0	5	1	0	0	0	2	2	1	0	0	1	1	2	0	2	3	0
3	0	0	1	0	1	0	0	0	0	4	1	1	1	0	0	0	0	0	1	0	0	1	1	0	0	1	0	0	0	3	2	2	5	1	0	0	0	2	3	0	0	0	0	1	2	0	0	1	0
0	0	0	1	0	3	0	0	0	0	4	0	1	1	0	0	0	1	1	1	0	0	0	0	0	0	0	0	1	0	1	0	0	4	0	0	0	1	2	2	2	0	1	1	1	0	0	3	0	0
4	0	0	1	0	1	0	0	0	0	4	1	1	3	0	0	0	2	1	1	0	0	0	0	0	0	1	0	0	0	1	0	0	5	1	0	0	0	2	2	1	0	0	0	1	0	0	0	1	0
0	2	1	1	2	4	1	0	0	0	4	0	1	1	0	0	0	2	0	3	0	0	0	0	0	3	0	2	1	0	3	0	0	3	1	0	1	1	0	2	1	0	1	1	1	2	0	4	2	0
0	2	1	1	2	4	1	0	0	0	4	0	1	0	0	0	0	2	0	3	0	0	0	0	0	3	1	2	0	0	2	0	0	3	1	0	1	0	0	2	1	0	1	2	1	2	0	4	2	0
0	0	1	1	0	4	0	1	0	0	3	0	1	1	0	0	0	3	0	1	0	0	1	0	0	2	1	0	1	0	1	0	0	1	0	0	1	2	2	2	1	0	1	1	1	0	0	4	1	0
0	1	1	1	0	3	0	1	1	1	3	0	1	1	0	0	0	2	0	1	0	2	1	0	0	2	1	0	1	0	1	0	0	1	0	0	1	0	0	2	1	1	2	1	1	1	0	3	1	0
0	0	0	1	0	4	1	2	2	0	4	1	1	0	0	0	0	2	0	1	0	0	0	1	0	2	1	2	0	0	2	0	0	1	0	0	3	0	1	2	1	0	1	2	1	2	0	3	1	0
3	0	2	1	0	4	0	0	0	0	4	1	1	3	0	1	0	3	1	3	0	0	1	0	0	2	1	0	0	0	1	0	0	3	1	0	1	0	0	3	0	0	1	0	1	2	2	3	3	2
1	0	1	1	2	4	0	0	0	0	4	2	1	0	0	0	0	2	0	2	0	0	0	1	0	2	1	0	0	0	2	0	0	1	1	0	3	0	0	2	1	0	1	1	3	0	0	4	1	0
0	0	1	1	0	4	0	1	0	0	2	0	1	0	0	0	0	3	0	1	0	0	2	0	0	2	1	0	1	0	0	0	0	1	1	0	1	2	2	2	0	0	1	1	1	0	0	4	0	0
1	0	0	1	0	3	0	0	0	0	2	0	1	1	0	0	0	2	1	1	0	0	2	0	0	2	1	0	0	0	1	0	0	4	1	0	1	0	0	2	0	0	0	0	1	0	0	3	1	1
0	0	0	1	2	4	1	0	0	0	2	1	1	1	0	0	0	2	0	1	0	0	1	1	0	2	0	0	1	0	3	0	0	1	1	0	1	1	1	3	0	0	1	0	1	2	0	3	1	0
0	0	1	1	0	4	0	1	0	0	3	0	1	0	0	0	0	2	0	1	0	0	1	0	0	0	1	0	1	0	0	0	0	1	1	0	0	2	2	2	0	0	3	1	1	0	0	4	0	0
0	0	0	1	0	4	0	0	0	0	4	1	3	1	0	0	0	0	0	3	0	0	0	1	0	0	1	0	0	0	3	0	0	1	0	0	0	0	0	3	1	2	4	1	1	2	0	4	1	0
1	0	0	1	0	3	0	0	0	0	4	1	3	1	0	0	0	0	0	3	0	0	0	1	0	0	1	0	0	0	3	0	0	2	0	0	0	0	0	3	1	2	3	1	1	2	0	3	1	0
3	2	0	1	1	4	0	0	0	0	3	1	1	3	0	0	0	0	1	1	0	0	0	1	0	1	1	2	0	0	1	0	0	3	1	0	0	0	0	2	0	0	3	0	1	0	0	3	1	0
1	0	1	1	0	2	0	1	0	0	4	1	1	0	0	0	0	2	0	1	0	0	0	0	0	0	1	0	1	0	0	0	0	3	1	0	0	2	3	2	0	0	1	1	1	0	0	3	0	0
1	0	0	1	0	1	0	0	0	0	4	0	1	1	0	0	0	2	1	1	0	0	0	0	0	0	1	0	0	0	1	0	0	4	0	0	0	2	3	2	3	0	0	1	1	0	0	2	1	0
4	0	0	1	0	1	0	0	0	0	4	1	1	1	0	0	0	2	1	1	0	0	0	0	0	0	1	0	0	0	1	2	0	5	1	0	0	0	2	2	1	0	0	0	1	0	0	0	1	0
0	3	1	1	2	3	1	0	1	1	4	0	1	1	0	0	0	2	0	3	0	0	0	0	0	3	1	2	0	0	3	0	0	3	1	0	1	0	0	2	1	1	0	1	1	3	0	3	3	0
0	0	0	1	0	4	0	0	0	0	4	2	1	1	0	0	2	2	1	1	0	2	1	0	0	2	0	0	1	0	3	0	0	1	0	0	1	1	0	2	1	0	1	1	3	0	0	4	0	1
2	0	1	1	0	3	0	1	0	0	3	1	1	1	0	0	0	2	0	1	0	2	1	0	0	2	1	0	1	0	1	0	0	2	1	0	1	0	0	2	0	0	2	0	1	0	0	3	1	0
1	0	1	1	0	4	0	1	0	0	3	1	1	1	0	0	0	2	0	1	0	2	1	0	0	2	0	0	2	0	1	0	0	1	1	0	1	1	0	2	0	0	3	0	1	0	0	4	0	0
1	2	1	1	2	4	1	0	0	0	4	1	1	1	0	0	0	2	0	3	0	0	0	0	0	3	1	2	0	0	3	0	0	3	2	0	1	0	0	2	0	0	1	0	1	2	0	4	3	0
1	0	0	1	0	4	0	0	0	0	3	1	1	1	0	0	0	2	1	1	0	0	1	0	0	2	1	0	0	0	1	0	0	3	1	0	1	0	0	2	0	0	1	0	1	0	0	4	1	1
1	1	0	1	0	3	0	0	1	1	3	1	1	1	0	0	0	2	1	1	0	0	1	0	0	2	1	0	0	0	1	0	0	3	1	0	1	0	0	2	0	1	0	0	1	1	0	3	1	1
2	0	0	1	0	3	1	0	0	0	4	2	3	1	0	0	0	2	0	3	0	0	0	1	0	2	1	0	0	0	3	0	0	2	1	0	1	0	1	3	0	2	2	0	1	2	0	3	2	0
0	0	1	1	0	4	0	1	0	0	2	0	1	1	0	0	0	3	0	1	0	0	2	0	0	2	1	0	1	0	1	0	0	1	1	0	1	2	2	2	0	0	1	0	1	0	0	4	1	0
0	0	1	1	0	4	0	1	0	0	2	0	1	1	0	0	0	3	0	1	0	0	2	0	0	2	0	0	2	0	1	0	0	1	1	0	1	3	2	2	0	0	1	0	1	0	0	4	0	0
2	1	0	1	0	3	1	0	1	1	3	1	1	1	0	0	0	2	0	1	0	0	1	1	0	2	1	0	0	0	3	2	2	3	1	0	1	0	1	3	0	1	0	0	1	3	0	2	2	0
1	0	1	1	0	3	0	1	0	0	2	0	1	1	0	0	0	2	0	1	0	2	2	0	0	2	1	0	1	0	1	0	0	2	1	0	1	0	0	2	0	0	2	0	1	0	0	3	1	0
1	2	1	1	2	3	1	0	0	0	3	0	1	1	0	0	0	2	0	3	0	0	1	0	0	3	1	2	0	0	3	0	0	4	2	0	1	0	0	2	0	0	0	0	1	2	0	3	3	0
0	0	0	1	0	4	0	0	0	0	4	2	1	0	0	0	2	0	1	2	0	2	0	0	0	0	1	0	0	0	2	0	0	1	0	0	0	0	0	2	1	0	3	2	3	0	0	4	0	0
1	2	0	1	2	4	0	0	0	0	4	1	1	0	0	0	0	0	1	3	0	0	0	0	0	1	1	2	0	0	2	0	0	3	2	0	0	0	0	2	0	0	3	1	1	2	0	4	2	0
2	1	0	1	0	3	0	0	1	1	3	1	1	1	0	0	0	0	0	1	0	0	1	1	0	0	1	0	0	0	3	2	2	3	1	0	0	0	0	3	0	1	2	0	1	3	0	2	1	0
1	0	0	1	0	3	0	0	0	0	3	2	1	1	0	0	2	0	1	2	0	2	1	0	0	0	1	0	0	0	3	0	0	2	1	0	0	0	0	2	0	0	2	0	3	0	0	3	1	0
0	3	0	1	2	3	0	0	1	1	3	0	1	1	0	0	0	0	1	3	0	0	1	0	0	1	1	2	0	0	3	0	0	3	2	0	0	0	0	2	0	1	2	0	1	3	0	3	3	0
0	2	0	1	2	4	0	0	0	0	3	0	1	0	0	0	0	0	1	3	0	0	1	0	0	1	1	2	0	0	2	0	0	3	2	0	0	0	0	2	0	0	3	1	1	2	0	4	2	0
2	1	0	1	0	1	0	0	1	1	5	1	1	1	0	0	0	0	0	1	0	0	0	1	0	0	1	0	0	0	3	2	2	4	0	0	0	0	2	3	1	1	0	1	1	3	0	0	1	0
0	3	0	1	2	1	0	0	1	1	5	0	1	1	0	0	0	0	0	3	0	0	0	0	0	1	1	2	0	0	3	0	0	4	1	0	0	0	2	2	1	1	0	1	1	3	0	2	3	0
2	0	2	1	0	2	0	0	0	0	5	0	1	2	0	1	0	2	1	3	0	1	0	0	0	0	1	0	0	0	0	0	0	4	0	0	0	0	2	3	2	0	1	2	1	2	2	1	2	2
3	2	0	1	0	2	0	0	0	0	5	1	1	1	0	0	0	1	0	1	0	0	0	0	0	1	1	2	0	0	1	0	0	4	1	0	1	0	2	3	0	0	1	0	1	0	0	3	1	0
4	2	0	1	0	1	0	0	0	0	5	1	1	1	0	0	0	1	0	1	0	0	0	0	0	1	1	2	0	0	1	0	0	5	1	0	1	0	2	3	0	0	0	0	1	0	0	2	1	0
1	0	0	1	0	2	0	0	0	0	4	0	1	1	0	0	0	1	1	1	0	0	0	0	0	0	1	0	0	0	1	0	0	5	0	0	0	0	2	2	2	0	0	1	1	0	0	2	1	0
0	0	0	1	0	2	0	0	0	0	4	0	1	1	0	0	0	2	1	1	0	0	0	0	0	0	0	0	1	0	1	0	0	3	0	0	0	3	3	2	3	0	1	1	1	0	0	3	0	0
3	0	0	1	0	2	0	0	0	0	4	1	1	1	0	0	0	2	1	1	0	0	0	0	0	0	0	0	1	0	1	2	0	4	1	0	0	1	2	2	1	0	1	0	1	0	0	1	0	0
1	0	0	1	0	2	0	0	0	0	3	0	1	3	0	0	0	2	1	1	0	0	1	0	0	0	1	0	0	0	1	0	0	4	1	0	0	0	2	2	1	0	0	0	1	0	0	0	1	0
0	1	0	1	0	2	0	0	1	1	3	0	1	3	0	0	0	2	1	1	0	0	1	0	0	0	1	0	0	0	1	0	0	3	1	0	0	0	2	2	1	1	0	0	1	1	0	0	1	0
0	0	0	1	0	4	0	0	0	0	3	0	1	1	0	0	0	2	1	1	0	0	1	0	0	2	1	0	0	0	1	0	0	3	0	0	1	0	0	2	1	0	1	1	1	0	0	4	1	1
1	0	0	1	0	3	0	0	0	0	4	2	1	1	0	0	2	2	1	1	0	2	1	0	0	2	1	0	0	0	3	0	0	2	0	0	1	0	0	2	1	0	0	1	3	0	0	3	1	1
2	0	0	1	0	3	0	0	0	0	3	1	1	1	0	0	0	2	1	1	0	0	1	0	0	2	1	0	0	0	1	0	0	4	1	0	1	0	0	2	0	0	0	0	1	0	0	3	1	1
0	3	1	1	2	3	1	0	1	1	3	0	1	1	0	0	0	2	0	3	0	0	1	0	0	3	1	2	0	0	3	0	0	3	2	0	1	0	0	2	0	1	0	0	1	3	0	3	3	0
3	0	2	1	0	4	0	0	0	0	4	1	1	3	0	1	0	1	1	3	0	1	0	0	0	0	0	0	1	0	1	0	0	3	1	0	0	1	0	3	0	0	3	0	1	2	2	3	2	2
1	2	0	1	2	3	0	0	0	0	3	0	1	1	0	0	0	0	1	3	0	0	1	0	0	1	1	2	0	0	3	0	0	4	2	0	0	0	0	2	0	0	2	0	1	2	0	3	3	0
3	2	0	1	0	3	0	0	2	0	3	0	1	1	0	0	2	0	0	3	0	0	1	0	0	0	1	0	0	0	1	0	0	4	1	0	0	1	2	3	0	0	3	1	1	0	0	3	1	0
1	0	0	1	2	3	0	0	0	0	2	1	1	1	0	0	0	0	0	1	0	0	1	1	0	0	1	0	0	0	3	0	0	2	1	0	0	0	0	3	0	0	2	0	1	2	0	2	1	0
2	2	0	1	1	4	0	0	0	0	2	0	1	3	0	0	0	0	1	1	0	0	1	1	0	1	0	2	1	0	1	0	0	3	1	0	0	1	0	2	0	0	3	0	1	0	0	3	0	0
2	0	0	1	0	2	0	0	0	0	4	1	1	1	0	0	0	0	0	1	0	0	1	1	0	0	0	0	1	0	3	2	2	4	1	0	0	1	2	3	0	0	1	0	1	2	0	1	0	0
0	2	0	1	2	2	0	0	0	0	4	0	1	1	0	0	0	0	0	3	0	0	1	0	0	1	1	2	0	0	3	0	0	4	2	0	0	0	2	2	0	0	1	0	1	2	0	3	3	0
2	1	0	1	0	1	0	0	1	1	4	0	1	1	0	0	0	2	1	1	0	0	0	0	0	0	1	0	0	0	1	2	0	4	0	0	0	0	2	2	2	1	0	1	1	1	0	0	1	0
3	0	0	1	0	2	0	0	0	0	4	1	1	0	0	0	0	2	1	1	0	0	0	0	0	0	1	0	0	0	0	2	0	4	1	0	0	0	2	2	1	0	1	1	1	0	0	1	0	0
1	0	0	1	0	3	0	0	0	0	4	1	1	2	0	0	0	2	1	1	0	0	0	0	0	0	1	0	0	0	0	0	0	3	1	0	0	0	2	2	1	0	1	1	1	0	0	1	0	0
3	0	0	1	0	1	0	0	0	0	3	0	1	3	0	0	0	2	1	1	0	0	1	0	0	0	1	0	0	0	1	0	0	5	1	0	0	0	2	2	1	0	0	0	1	0	0	0	1	0
2	1	0	1	0	3	1	0	1	1	4	1	1	1	0	0	0	2	0	1	0	0	0	1	0	2	1	0	0	0	3	2	2	3	0	0	1	0	1	3	1	1	0	1	1	3	0	2	2	0
2	2	0	1	0	4	0	0	2	0	4	0	1	1	0	0	2	2	0	3	0	0	1	0	0	2	0	0	1	0	1	0	0	3	0	0	1	2	2	3	2	0	3	2	1	0	0	4	0	0
1	0	1	1	2	3	0	0	0	0	4	1	1	1	0	0	0	2	0	2	0	0	0	1	0	2	1	0	0	0	3	0	0	2	0	0	3	0	0	2	2	0	0	1	3	0	0	3	2	0
1	0	0	1	0	4	1	2	2	0	4	2	1	1	0	0	0	2	0	1	0	0	0	1	0	2	1	2	0	0	3	0	0	1	1	0	3	0	1	2	0	0	1	0	1	2	0	3	2	0
3	0	2	1	0	4	0	0	0	0	4	1	1	3	0	1	0	3	1	3	0	0	1	0	0	2	0	0	1	0	1	0	0	3	1	0	1	1	0	3	0	0	1	0	1	2	2	3	2	2
1	0	0	1	0	4	1	0	0	0	4	2	3	0	0	0	0	2	0	3	0	0	0	1	0	2	1	0	0	0	2	0	0	1	1	0	1	0	1	3	0	2	3	1	1	2	0	4	1	0
0	1	1	1	0	3	0	1	1	1	2	0	1	1	0	0	0	3	0	1	0	0	2	0	0	2	1	0	1	0	1	0	0	1	1	0	1	2	2	2	0	1	0	0	1	1	0	3	1	0
2	0	0	1	0	4	0	0	0	0	2	0	1	2	0	0	0	3	1	1	0	0	2	0	0	2	1	0	0	0	0	0	0	3	1	0	1	0	0	2	0	0	1	1	1	0	0	3	0	1
2	3	0	1	0	3	0	0	1	1	4	0	1	1	0	0	0	1	0	1	0	0	0	0	0	1	1	2	0	0	1	0	0	3	0	0	0	0	0	3	1	1	2	1	1	1	0	3	1	0
0	1	0	1	0	3	0	0	1	1	4	2	1	1	0	0	2	0	1	2	0	2	0	0	0	0	1	0	0	0	3	0	0	1	0	0	0	0	0	2	1	1	2	1	3	1	0	3	1	0
0	0	0	1	0	4	0	0	0	0	4	1	3	0	0	0	0	0	0	3	0	0	0	1	0	0	1	0	0	0	2	0	0	1	0	0	0	0	0	3	1	2	4	2	1	2	0	4	0	0
0	1	0	1	2	3	0	0	1	1	2	1	1	1	0	0	0	0	0	1	0	0	1	1	0	0	1	0	0	0	3	0	0	1	1	0	0	0	0	3	0	1	2	0	1	3	0	2	1	0
2	0	0	1	0	2	0	0	0	0	5	1	1	1	0	0	0	0	0	1	0	0	0	1	0	0	0	0	1	0	3	2	2	4	0	0	0	1	2	3	1	0	1	1	1	2	0	1	0	0
1	2	0	1	2	2	0	0	0	0	5	1	1	0	0	0	0	0	0	3	0	0	0	0	0	1	1	2	0	0	2	0	0	4	2	0	0	0	2	2	0	0	1	1	1	2	0	3	2	0
1	0	0	1	0	3	0	0	0	0	4	1	1	1	0	0	0	1	1	1	0	0	0	0	0	0	0	0	1	0	1	0	0	4	1	0	0	1	2	2	1	0	1	0	1	0	0	3	0	0
2	0	0	1	0	2	0	0	0	0	3	0	1	3	0	0	0	2	1	1	0	0	1	0	0	0	0	0	1	0	1	0	0	4	1	0	0	1	2	2	1	0	1	0	1	0	0	1	0	0
2	0	0	1	0	4	0	0	0	0	3	0	1	1	0	0	0	3	1	1	0	0	1	0	0	2	1	0	0	0	1	2	0	3	0	0	1	0	0	2	1	0	1	1	1	0	0	3	1	1
0	0	0	1	0	4	0	0	0	0	3	0	1	0	0	0	0	2	1	1	0	0	1	0	0	2	1	0	0	0	0	0	0	3	0	0	1	0	0	2	1	0	1	2	1	0	0	4	0	1
1	0	1	1	0	3	0	1	0	0	3	0	1	1	0	0	0	3	0	1	0	0	1	0	0	2	1	0	1	0	1	0	0	2	0	0	1	2	2	2	1	0	0	1	1	0	0	3	1	0
0	1	0	1	0	3	1	2	3	1	4	1	1	1	0	0	0	2	0	1	0	0	0	1	0	2	1	2	0	0	3	0	0	1	0	0	3	0	1	2	1	1	0	1	1	3	0	2	2	0
0	0	0	1	0	4	1	0	0	0	4	1	3	1	0	0	0	2	0	3	0	0	0	1	0	2	1	0	0	0	3	0	0	1	0	0	1	0	1	3	1	2	3	1	1	2	0	4	2	0
1	0	1	1	0	4	0	1	0	0	3	1	1	0	0	0	0	3	0	1	0	0	1	0	0	2	1	0	1	0	0	0	0	1	1	0	1	2	2	2	0	0	1	1	1	0	0	4	0	0
2	0	0	1	0	4	0	0	0	0	2	0	1	3	0	0	0	3	1	1	0	0	2	0	0	2	1	0	0	0	1	0	0	3	1	0	1	0	0	2	0	0	1	0	1	0	0	3	1	1
0	1	1	1	2	3	0	0	1	1	3	1	1	1	0	0	0	2	0	2	0	0	1	1	0	2	1	0	0	0	3	0	0	1	1	0	3	0	0	2	1	1	0	0	3	1	0	3	2	0
3	3	0	1	0	3	0	0	1	1	4	1	1	1	0	0	0	1	0	1	0	0	0	0	0	1	1	2	0	0	1	0	0	3	1	0	0	0	0	3	0	1	2	0	1	1	0	3	1	0
2	1	2	1	0	3	0	0	1	1	3	0	1	3	0	1	0	1	1	3	0	1	1	0	0	0	1	0	0	0	1	0	0	3	1	0	0	0	0	3	0	1	2	0	1	3	2	2	3	2
3	0	2	1	0	1	0	0	0	0	5	0	1	3	0	1	0	2	1	3	0	1	0	0	0	0	1	0	0	0	1	0	0	5	0	0	0	0	2	3	2	0	0	1	1	2	2	0	3	2
1	0	0	1	0	3	0	0	0	0	5	3	1	1	0	0	2	1	1	1	0	2	0	0	0	0	0	0	1	0	3	0	0	3	1	0	0	1	2	2	1	0	1	0	3	0	0	3	0	0
0	0	0	1	0	3	0	0	0	0	4	2	1	1	0	0	2	1	1	1	0	2	1	0	0	0	1	0	0	0	3	0	0	3	1	0	0	0	2	2	1	0	1	0	3	0	0	3	1	0
3	0	0	1	0	2	0	0	0	0	4	1	1	1	0	0	0	2	1	1	0	0	0	0	0	0	1	0	0	0	1	2	0	4	1	0	0	0	2	2	1	0	1	0	1	0	0	1	1	0
0	1	0	1	0	2	0	0	1	1	3	0	1	1	0	0	0	1	1	1	0	0	1	0	0	0	1	0	0	0	1	0	0	4	1	0	0	0	2	2	1	1	0	0	1	1	0	2	1	0
3	0	2	1	0	3	0	0	0	0	4	0	1	3	0	1	0	3	1	3	0	0	1	0	0	2	1	0	0	0	1	0	0	4	0	0	1	0	0	3	1	0	0	1	1	2	2	2	3	2
2	0	2	1	0	4	0	0	0	0	4	0	1	2	0	1	0	3	1	3	0	0	1	0	0	2	1	0	0	0	0	0	0	3	0	0	1	0	0	3	1	0	1	2	1	2	2	3	2	2
2	0	0	1	0	4	0	0	0	0	3	0	1	1	0	0	0	3	1	1	0	0	1	0	0	2	0	0	1	0	1	2	0	3	0	0	1	1	0	2	1	0	1	1	1	0	0	3	0	1
1	0	0	1	0	3	1	0	0	0	3	2	1	1	0	0	2	2	0	1	0	0	0	1	0	2	1	0	0	0	3	0	0	2	0	0	1	0	1	2	1	0	0	1	1	2	0	2	2	0
3	1	2	1	0	3	0	0	1	1	4	1	1	3	0	1	0	3	1	3	0	0	1	0	0	2	1	0	0	0	1	0	0	3	1	0	1	0	0	3	0	1	0	0	1	3	2	2	3	2
1	0	0	1	2	4	1	0	0	0	3	2	1	1	0	0	0	2	0	1	0	0	0	1	0	2	0	0	1	0	3	0	0	1	1	0	1	1	1	3	0	0	1	0	1	2	0	3	1	0
0	0	0	1	0	4	1	0	0	0	2	2	1	0	0	0	2	2	0	1	0	0	1	1	0	2	1	0	0	0	2	0	0	1	1	0	1	0	1	2	0	0	1	1	1	2	0	3	1	0
2	3	0	1	0	3	0	0	3	1	3	0	1	1	0	0	2	2	0	3	0	0	2	0	0	2	1	0	0	0	1	0	0	3	1	0	1	1	2	3	1	1	2	1	1	1	0	3	1	0
2	2	1	1	1	4	1	0	0	0	2	0	1	2	0	0	0	2	0	1	0	0	1	1	0	3	1	2	0	0	0	0	0	3	1	0	1	0	0	2	0	0	1	1	1	0	0	3	0	0
0	0	1	1	0	4	0	1	0	0	3	0	1	1	0	0	0	2	0	1	0	0	1	0	0	0	0	0	2	0	1	0	0	1	1	0	0	3	2	2	0	0	3	0	1	0	0	4	0	0
2	0	0	1	0	4	0	0	0	0	3	1	1	1	0	0	0	0	0	1	0	0	1	1	0	0	1	0	0	0	3	2	2	3	1	0	0	0	0	3	0	0	3	0	1	2	0	3	1	0
0	0	0	1	0	4	0	0	0	0	3	2	1	1	0	0	2	0	1	2	0	2	1	0	0	0	1	0	0	0	3	0	0	1	1	0	0	0	0	2	0	0	3	0	3	0	0	4	1	0
0	0	2	1	2	4	0	0	0	0	3	1	1	1	0	0	0	0	0	1	0	0	0	1	0	0	1	0	0	0	3	0	0	1	0	0	0	0	0	2	1	0	3	1	1	2	0	3	1	0
0	1	2	1	2	3	0	0	1	1	2	1	1	1	0	0	0	0	0	1	0	0	1	1	0	0	1	0	0	0	3	0	0	1	1	0	0	0	0	2	0	1	2	0	1	3	0	2	1	0
0	0	2	1	2	4	0	0	0	0	2	1	1	1	0	0	0	0	0	1	0	0	1	1	0	0	0	0	1	0	3	0	0	1	1	0	0	1	0	2	0	0	3	0	1	2	0	3	0	0
2	2	0	1	0	2	0	0	0	0	5	0	1	1	0	0	0	1	0	1	0	0	0	0	0	1	0	2	1	0	1	0	0	4	0	0	1	1	2	3	1	0	1	1	1	0	0	3	0	0
0	2	0	1	2	2	0	0	0	0	5	0	1	1	0	0	0	0	0	3	0	0	0	0	0	1	0	2	1	0	3	0	0	4	1	0	0	1	2	2	1	0	1	1	1	2	0	3	2	0
2	0	2	1	0	2	0	0	0	0	5	0	1	3	0	1	0	2	1	3	0	1	0	0	0	0	1	0	0	0	1	0	0	4	0	0	0	0	2	3	2	0	1	1	1	2	2	1	3	2
3	3	0	1	0	1	0	0	1	1	5	1	1	1	0	0	0	1	0	1	0	0	0	0	0	1	1	2	0	0	1	0	0	4	1	0	1	0	2	3	0	1	0	0	1	1	0	2	1	0
1	0	1	1	0	2	0	1	0	0	4	1	1	1	0	0	0	2	0	1	0	0	0	0	0	0	1	0	1	0	1	0	0	3	1	0	0	2	3	2	0	0	1	0	1	0	0	3	1	0
3	0	2	1	0	2	0	0	0	0	5	1	1	3	0	1	0	2	1	3	0	1	0	0	0	0	1	0	0	0	1	0	0	4	1	0	0	0	2	3	1	0	1	0	1	2	2	1	3	2
2	2	0	1	0	2	0	0	0	0	4	0	1	1	0	0	0	1	0	1	0	0	1	0	0	1	0	2	1	0	1	0	0	4	1	0	1	1	2	3	0	0	1	0	1	0	0	3	0	0
3	0	2	1	0	1	0	0	0	0	4	0	1	3	0	1	0	2	1	3	0	1	1	0	0	0	1	0	0	0	1	0	0	5	1	0	0	0	2	3	1	0	0	0	1	2	2	0	3	2
2	0	0	1	0	2	0	0	0	0	3	0	1	2	0	0	0	2	1	1	0	0	1	0	0	0	1	0	0	0	0	0	0	4	1	0	0	0	2	2	1	0	1	1	1	0	0	1	0	0
1	0	0	1	0	1	0	0	0	0	3	0	1	1	0	0	0	2	1	1	0	0	1	0	0	0	1	0	0	0	1	0	0	4	1	0	0	2	3	2	2	0	0	0	1	0	0	2	1	0
0	1	0	1	0	3	0	0	1	1	4	2	1	1	0	0	2	2	1	1	0	2	1	0	0	2	1	0	0	0	3	0	0	1	0	0	1	0	0	2	1	1	0	1	3	1	0	3	1	1
1	0	0	1	2	3	1	0	0	0	3	1	1	1	0	0	0	2	0	1	0	0	0	1	0	2	1	0	0	0	3	0	0	2	0	0	1	0	1	3	1	0	0	1	1	2	0	2	2	0
4	0	0	1	0	3	0	0	0	0	3	1	1	1	0	0	0	3	1	1	0	0	1	0	0	2	1	0	0	0	1	2	0	4	1	0	1	0	0	2	0	0	0	0	1	0	0	2	1	1
1	0	0	1	0	4	1	0	0	0	3	3	1	1	0	0	2	2	0	1	0	0	0	1	0	2	0	0	1	0	3	0	0	1	1	0	1	1	1	2	0	0	1	0	1	2	0	3	1	0
0	0	1	1	0	4	0	1	0	0	2	0	1	1	0	0	0	2	0	1	0	2	2	0	0	2	1	0	1	0	1	0	0	1	1	0	1	0	0	2	0	0	3	0	1	0	0	4	1	0
0	1	0	1	0	3	0	0	1	1	2	0	1	3	0	0	0	3	1	1	0	0	2	0	0	2	1	0	0	0	1	0	0	1	1	0	1	0	0	2	0	1	0	0	1	1	0	2	1	1
2	3	1	1	1	3	1	0	1	1	2	0	1	3	0	0	0	2	0	1	0	0	1	1	0	3	1	2	0	0	1	0	0	3	1	0	1	0	0	2	0	1	0	0	1	1	0	2	1	0
0	0	1	1	2	4	0	0	0	0	3	1	1	1	0	0	0	2	0	2	0	0	1	1	0	2	1	0	0	0	3	0	0	1	1	0	3	0	0	2	1	0	1	0	3	0	0	4	2	0
0	0	1	1	0	4	0	1	0	0	4	0	1	1	0	0	0	2	0	1	0	0	0	0	0	0	1	0	1	0	1	0	0	1	0	0	0	2	2	2	1	0	3	1	1	0	0	4	1	0
3	0	0	1	0	3	0	0	0	0	4	1	1	1	0	0	0	0	0	1	0	0	0	1	0	0	1	0	0	0	3	2	2	4	0	0	0	0	0	3	1	0	2	1	1	2	0	2	1	0
2	2	0	1	2	3	0	0	0	0	4	1	1	1	0	0	0	0	1	3	0	0	0	0	0	1	1	2	0	0	3	0	0	4	2	0	0	0	0	2	0	0	2	0	1	2	0	3	3	0
2	0	2	1	0	4	0	0	0	0	3	0	1	3	0	1	0	1	1	3	0	1	1	0	0	0	1	0	0	0	1	0	0	3	1	0	0	0	0	3	0	0	3	0	1	2	2	3	3	2
2	0	0	1	2	3	0	0	0	0	3	2	1	1	0	0	0	0	0	1	0	0	0	1	0	0	1	0	0	0	3	0	0	2	1	0	0	0	0	3	0	0	2	0	1	2	0	2	1	0
3	3	0	1	1	3	0	0	1	1	3	1	1	3	0	0	0	0	1	1	0	0	0	1	0	1	1	2	0	0	1	0	0	3	1	0	0	0	0	2	0	1	2	0	1	1	0	2	1	0
0	0	1	1	0	2	0	1	0	0	4	0	1	1	0	0	0	2	0	1	0	0	0	0	0	0	0	0	2	0	1	0	0	3	0	0	0	3	3	2	1	0	1	1	1	0	0	3	0	0
1	0	1	1	0	2	0	1	0	0	4	1	1	1	0	0	0	2	0	1	0	0	0	0	0	0	0	0	2	0	1	0	0	3	1	0	0	3	3	2	0	0	1	0	1	0	0	3	0	0
3	0	0	1	0	2	0	0	0	0	5	2	1	1	0	0	0	0	0	1	0	0	0	1	0	0	1	0	0	0	3	2	2	4	1	0	0	0	2	3	0	0	1	0	1	2	0	1	1	0
0	3	0	1	2	1	0	0	1	1	4	0	1	1	0	0	0	0	0	3	0	0	1	0	0	1	1	2	0	0	3	0	0	4	2	0	0	0	2	2	0	1	0	0	1	3	0	2	3	0
3	0	0	1	0	1	0	0	0	0	4	0	1	1	0	0	0	2	1	1	0	0	0	0	0	0	1	0	0	0	1	2	0	5	0	0	0	0	2	2	2	0	0	1	1	0	0	0	1	0
2	1	0	1	0	1	0	0	1	1	4	0	1	3	0	0	0	2	1	1	0	0	0	0	0	0	1	0	0	0	1	0	0	4	0	0	0	0	2	2	2	1	0	1	1	1	0	0	1	0
1	0	0	1	0	2	0	0	0	0	3	0	1	1	0	0	0	1	1	1	0	0	1	0	0	0	1	0	0	0	1	0	0	5	1	0	0	0	2	2	1	0	0	0	1	0	0	2	1	0
3	0	0	1	0	3	0	0	0	0	3	0	1	3	0	0	0	3	1	1	0	0	1	0	0	2	1	0	0	0	1	0	0	4	0	0	1	0	0	2	1	0	0	1	1	0	0	2	1	1
0	0	1	1	0	4	0	1	0	0	3	0	1	1	0	0	0	3	0	1	0	0	1	0	0	2	0	0	2	0	1	0	0	1	0	0	1	3	2	2	1	0	1	1	1	0	0	4	0	0
2	0	0	1	0	4	1	0	0	0	4	1	1	1	0	0	0	2	0	1	0	0	0	1	0	2	0	0	1	0	3	2	2	3	0	0	1	1	1	3	1	0	1	1	1	2	0	3	1	0
3	2	0	1	0	3	0	0	2	0	4	0	1	1	0	0	2	2	0	3	0	0	1	0	0	2	1	0	0	0	1	0	0	4	0	0	1	1	2	3	2	0	2	2	1	0	0	3	1	0
0	0	1	1	2	4	0	0	0	0	4	1	1	0	0	0	0	2	0	2	0	0	0	1	0	2	1	0	0	0	2	0	0	1	0	0	3	0	0	2	2	0	1	2	3	0	0	4	1	0
1	1	0	1	0	3	1	2	3	1	4	2	1	1	0	0	0	2	0	1	0	0	0	1	0	2	1	2	0	0	3	0	0	1	1	0	3	0	1	2	0	1	0	0	1	3	0	2	2	0
1	0	0	1	0	4	0	0	0	0	4	3	1	0	0	0	2	2	1	1	0	2	1	0	0	2	1	0	0	0	2	0	0	1	1	0	1	0	0	2	0	0	1	1	3	0	0	4	0	1
1	0	0	1	0	4	0	0	0	0	3	1	1	0	0	0	0	2	1	1	0	0	1	0	0	2	1	0	0	0	0	0	0	3	1	0	1	0	0	2	0	0	1	1	1	0	0	4	0	1
0	0	1	1	0	4	0	1	0	0	2	0	1	1	0	0	0	2	0	1	0	2	2	0	0	2	0	0	2	0	1	0	0	1	1	0	1	1	0	2	0	0	3	0	1	0	0	4	0	0
0	0	0	1	0	4	1	2	2	0	3	1	1	1	0	0	0	2	0	1	0	0	1	1	0	2	1	2	0	0	3	0	0	1	1	0	3	0	1	2	0	0	1	0	1	2	0	3	2	0
2	1	2	1	0	3	0	0	1	1	3	0	1	3	0	1	0	3	1	3	0	0	2	0	0	2	1	0	0	0	1	0	0	3	1	0	1	0	0	3	0	1	0	0	1	3	2	2	3	2
0	0	0	1	0	4	0	0	0	0	2	0	1	1	0	0	0	2	1	1	0	0	2	0	0	2	0	0	1	0	1	0	0	3	1	0	1	1	0	2	0	0	1	0	1	0	0	4	0	1
2	0	2	1	0	4	0	0	0	0	4	0	1	3	0	1	0	1	1	3	0	1	0	0	0	0	1	0	0	0	1	0	0	3	0	0	0	0	0	3	1	0	3	1	1	2	2	3	3	2
2	0	1	1	0	3	0	1	0	0	4	1	1	1	0	0	0	2	0	1	0	0	0	0	0	0	1	0	1	0	1	0	0	2	1	0	0	2	2	2	0	0	2	0	1	0	0	3	1	0
1	1	1	1	0	3	0	1	1	1	4	1	1	1	0	0	0	2	0	1	0	0	0	0	0	0	1	0	1	0	1	0	0	1	1	0	0	2	2	2	0	1	2	0	1	1	0	3	1	0
3	1	0	1	0	3	0	0	1	1	4	2	1	1	0	0	0	0	0	1	0	0	0	1	0	0	1	0	0	0	3	2	2	3	1	0	0	0	0	3	0	1	2	0	1	3	0	2	1	0
2	0	0	1	0	3	0	0	0	0	4	3	1	1	0	0	2	0	1	2	0	2	0	0	0	0	1	0	0	0	3	0	0	2	1	0	0	0	0	2	0	0	2	0	3	0	0	3	1	0
3	0	2	1	0	3	0	0	0	0	3	0	1	3	0	1	0	1	1	3	0	1	1	0	0	0	1	0	0	0	1	0	0	4	1	0	0	0	0	3	0	0	2	0	1	2	2	2	3	2
0	0	2	1	2	4	0	0	0	0	3	1	1	1	0	0	0	0	0	1	0	0	0	1	0	0	0	0	1	0	3	0	0	1	0	0	0	1	0	2	1	0	3	1	1	2	0	3	0	0
0	0	0	1	0	4	0	0	0	0	4	1	3	1	0	0	0	0	0	3	0	0	0	1	0	0	0	0	1	0	3	0	0	1	0	0	0	1	0	3	1	2	4	1	1	2	0	4	0	0
3	2	0	1	0	3	0	0	2	0	4	0	1	1	0	0	2	0	0	3	0	0	0	0	0	0	1	0	0	0	1	0	0	4	0	0	0	1	2	3	1	0	3	2	1	0	0	3	1	0
4	2	0	1	0	3	0	0	2	0	4	1	1	1	0	0	2	0	0	3	0	0	0	0	0	0	1	0	0	0	1	0	0	4	1	0	0	1	2	3	0	0	3	1	1	0	0	3	1	0
3	2	0	1	1	4	0	0	0	0	3	1	1	3	0	0	0	0	1	1	0	0	0	1	0	1	0	2	1	0	1	0	0	3	1	0	0	1	0	2	0	0	3	0	1	0	0	3	0	0
2	3	0	1	1	3	0	0	1	1	2	0	1	3	0	0	0	0	1	1	0	0	1	1	0	1	1	2	0	0	1	0	0	3	1	0	0	0	0	2	0	1	2	0	1	1	0	2	1	0
3	0	0	1	0	1	0	0	0	0	5	1	1	1	0	0	0	0	0	1	0	0	0	1	0	0	1	0	0	0	3	2	2	5	0	0	0	0	2	3	1	0	0	1	1	2	0	0	1	0
3	2	0	1	0	2	0	0	0	0	5	1	1	0	0	0	0	1	0	1	0	0	0	0	0	1	1	2	0	0	0	0	0	4	1	0	1	0	2	3	0	0	1	1	1	0	0	3	0	0
2	3	0	1	0	1	0	0	1	1	4	0	1	1	0	0	0	1	0	1	0	0	1	0	0	1	1	2	0	0	1	0	0	4	1	0	1	0	2	3	0	1	0	0	1	1	0	2	1	0
2	0	0	1	0	2	0	0	0	0	3	0	1	1	0	0	0	2	1	1	0	0	1	0	0	0	1	0	0	0	1	2	0	4	1	0	0	0	2	2	1	0	1	0	1	0	0	1	1	0
0	0	0	1	0	3	0	0	0	0	3	0	1	3	0	0	0	2	1	1	0	0	1	0	0	0	0	0	1	0	1	0	0	3	1	0	0	1	2	2	1	0	1	0	1	0	0	1	0	0
[truncated: 85 more columns]

## Sheet: Figure S6_RF
0	1	2	3	4	5	6	7	8	9	10	11	12	13	14	15	16	17	18	19	20	21	22	23	24	25	26	27	28	29	30	31	32	33	34	35	36	37	38	39	40	41	42	43	44	45	46	47	48	49
0	0	0	1	0	4	0	0	0	0	3	0	1	2	0	0	0	3	1	1	0	0	1	0	0	2	1	0	0	0	0	0	0	1	0	0	1	0	0	2	1	0	1	2	1	0	0	3	0	1
1	0	0	1	0	4	1	0	0	0	3	3	1	1	0	0	2	2	0	1	0	0	0	1	0	2	1	0	0	0	3	0	0	1	1	0	1	0	1	2	0	0	1	0	1	2	0	3	2	0
3	3	1	1	1	3	1	0	1	1	3	1	1	3	0	0	0	2	0	1	0	0	0	1	0	3	1	2	0	0	1	0	0	3	1	0	1	0	0	2	0	1	0	0	1	1	0	2	1	0
2	0	0	1	0	4	1	0	0	0	3	1	1	1	0	0	0	2	0	1	0	0	1	1	0	2	0	0	1	0	3	2	2	3	1	0	1	1	1	3	0	0	1	0	1	2	0	3	1	0
2	0	0	1	0	4	1	0	0	0	3	1	1	0	0	0	0	2	0	1	0	0	1	1	0	2	1	0	0	0	2	2	2	3	1	0	1	0	1	3	0	0	1	1	1	2	0	3	1	0
0	0	1	1	0	4	0	1	0	0	2	0	1	0	0	0	0	2	0	1	0	2	2	0	0	2	1	0	1	0	0	0	0	1	1	0	1	0	0	2	0	0	3	1	1	0	0	4	0	0
0	0	0	1	0	4	1	2	2	0	3	1	1	1	0	0	0	2	0	1	0	0	1	1	0	2	0	2	1	0	3	0	0	1	1	0	3	1	1	2	0	0	1	0	1	2	0	3	1	0
1	0	0	1	0	3	0	0	0	0	2	0	1	3	0	0	0	3	1	1	0	0	2	0	0	2	1	0	0	0	1	0	0	2	1	0	1	0	0	2	0	0	0	0	1	0	0	2	1	1
1	0	1	1	0	3	0	1	0	0	4	0	1	1	0	0	0	2	0	1	0	0	0	0	0	0	1	0	1	0	1	0	0	2	0	0	0	2	2	2	1	0	2	1	1	0	0	3	1	0
1	2	0	1	2	3	0	0	0	0	4	0	1	1	0	0	0	0	1	3	0	0	0	0	0	1	1	2	0	0	3	0	0	4	1	0	0	0	0	2	1	0	2	1	1	2	0	3	3	0
4	0	0	1	0	3	0	0	0	0	4	2	1	1	0	0	0	0	0	1	0	0	0	1	0	0	1	0	0	0	3	2	2	4	1	0	0	0	0	3	0	0	2	0	1	2	0	2	1	0
1	1	0	1	0	3	0	0	1	1	4	3	1	1	0	0	2	0	1	2	0	2	0	0	0	0	1	0	0	0	3	0	0	1	1	0	0	0	0	2	0	1	2	0	3	1	0	3	1	0
1	0	0	1	0	4	0	0	0	0	4	3	1	0	0	0	2	0	1	2	0	2	0	0	0	0	1	0	0	0	2	0	0	1	1	0	0	0	0	2	0	0	3	1	3	0	0	4	0	0
3	2	0	1	0	4	0	0	2	0	4	1	1	0	0	0	2	0	0	3	0	0	0	0	0	0	1	0	0	0	0	0	0	3	1	0	0	1	2	3	0	0	4	2	1	0	0	4	0	0
2	2	0	1	0	2	0	0	0	0	4	0	1	1	0	0	0	1	0	1	0	0	1	0	0	1	1	2	0	0	1	0	0	4	1	0	1	0	2	3	0	0	1	0	1	0	0	3	1	0
1	0	1	1	0	1	0	1	0	0	3	0	1	1	0	0	0	2	0	1	0	0	1	0	0	0	1	0	1	0	1	0	0	4	1	0	0	2	3	2	0	0	0	0	1	0	0	2	1	0
0	0	1	1	0	2	0	1	0	0	3	0	1	1	0	0	0	2	0	1	0	0	1	0	0	0	0	0	2	0	1	0	0	3	1	0	0	3	3	2	0	0	1	0	1	0	0	3	0	0
0	2	0	1	2	2	0	0	0	0	4	0	1	1	0	0	0	0	0	3	0	0	1	0	0	1	0	2	1	0	3	0	0	4	2	0	0	1	2	2	0	0	1	0	1	2	0	3	2	0
2	0	2	1	0	2	0	0	0	0	4	0	1	2	0	1	0	2	1	3	0	1	1	0	0	0	1	0	0	0	0	0	0	4	1	0	0	0	2	3	1	0	1	1	1	2	2	1	2	2
0	1	0	1	0	1	0	0	1	1	4	0	1	1	0	0	0	2	1	1	0	0	0	0	0	0	1	0	0	0	1	0	0	3	0	0	0	2	3	2	3	1	0	1	1	1	0	2	1	0
1	0	0	1	0	3	0	0	0	0	4	1	1	1	0	0	0	1	1	1	0	0	0	0	0	0	1	0	0	0	1	0	0	4	1	0	0	0	2	2	1	0	1	0	1	0	0	3	1	0
1	0	0	1	0	3	0	0	0	0	4	1	1	0	0	0	0	1	1	1	0	0	0	0	0	0	1	0	0	0	0	0	0	4	1	0	0	0	2	2	1	0	1	1	1	0	0	3	0	0
0	0	0	1	0	3	0	0	0	0	3	0	1	1	0	0	0	1	1	1	0	0	1	0	0	0	1	0	0	0	1	0	0	4	1	0	0	0	2	2	1	0	1	0	1	0	0	3	1	0
0	0	0	1	0	4	0	0	0	0	3	0	1	3	0	0	0	3	1	1	0	0	1	0	0	2	0	0	1	0	1	0	0	1	0	0	1	1	0	2	1	0	1	1	1	0	0	3	0	1
2	3	1	1	1	3	1	0	1	1	3	0	1	3	0	0	0	2	0	1	0	0	0	1	0	3	1	2	0	0	1	0	0	3	0	0	1	0	0	2	1	1	0	1	1	1	0	2	1	0
1	0	0	1	0	4	0	0	0	0	3	1	1	3	0	0	0	3	1	1	0	0	1	0	0	2	0	0	1	0	1	0	0	1	1	0	1	1	0	2	0	0	1	0	1	0	0	3	0	1
2	0	0	1	0	3	1	0	0	0	3	3	1	1	0	0	2	2	0	1	0	0	0	1	0	2	1	0	0	0	3	0	0	2	1	0	1	0	1	2	0	0	0	0	1	2	0	2	2	0
2	0	2	1	0	4	0	0	0	0	3	0	1	3	0	1	0	3	1	3	0	0	2	0	0	2	1	0	0	0	1	0	0	3	1	0	1	0	0	3	0	0	1	0	1	2	2	3	3	2
0	0	0	1	0	4	0	0	0	0	2	0	1	1	0	0	0	2	1	1	0	0	2	0	0	2	1	0	0	0	1	0	0	3	1	0	1	0	0	2	0	0	1	0	1	0	0	4	1	1
2	2	0	1	0	4	0	0	0	0	4	0	1	0	0	0	0	1	0	1	0	0	0	0	0	1	1	2	0	0	0	0	0	3	0	0	0	0	0	3	1	0	3	2	1	0	0	4	0	0
3	2	0	1	0	4	0	0	0	0	4	1	1	1	0	0	0	1	0	1	0	0	0	0	0	1	0	2	1	0	1	0	0	3	1	0	0	1	0	3	0	0	3	0	1	0	0	4	0	0
1	0	1	1	0	4	0	1	0	0	4	1	1	0	0	0	0	2	0	1	0	0	0	0	0	0	1	0	1	0	0	0	0	1	1	0	0	2	2	2	0	0	3	1	1	0	0	4	0	0
3	0	0	1	0	4	0	0	0	0	4	2	1	1	0	0	0	0	0	1	0	0	0	1	0	0	1	0	0	0	3	2	2	3	1	0	0	0	0	3	0	0	3	0	1	2	0	3	1	0
3	0	0	1	0	4	0	0	0	0	4	2	1	1	0	0	0	0	0	1	0	0	0	1	0	0	0	0	1	0	3	2	2	3	1	0	0	1	0	3	0	0	3	0	1	2	0	3	0	0
0	2	0	1	2	4	0	0	0	0	3	0	1	1	0	0	0	0	1	3	0	0	1	0	0	1	0	2	1	0	3	0	0	3	2	0	0	1	0	2	0	0	3	0	1	2	0	4	2	0
2	0	2	1	0	4	0	0	0	0	3	0	1	3	0	1	0	1	1	3	0	1	1	0	0	0	0	0	1	0	1	0	0	3	1	0	0	1	0	3	0	0	3	0	1	2	2	3	2	2
2	2	0	1	0	4	0	0	2	0	4	0	1	1	0	0	2	0	0	3	0	0	0	0	0	0	1	0	0	0	1	0	0	3	0	0	0	1	2	3	1	0	4	2	1	0	0	4	1	0
0	1	0	1	2	3	0	0	1	1	3	1	1	1	0	0	0	0	0	1	0	0	0	1	0	0	1	0	0	0	3	0	0	1	0	0	0	0	0	3	1	1	2	1	1	3	0	2	1	0
1	0	0	1	0	4	0	0	0	0	4	2	3	0	0	0	0	0	0	3	0	0	0	1	0	0	1	0	0	0	2	0	0	1	1	0	0	0	0	3	0	2	4	1	1	2	0	4	0	0
1	0	0	1	0	3	0	0	0	0	3	1	3	1	0	0	0	0	0	3	0	0	1	1	0	0	1	0	0	0	3	0	0	2	1	0	0	0	0	3	0	2	3	0	1	2	0	3	1	0
2	2	0	1	0	4	0	0	2	0	3	0	1	1	0	0	2	0	0	3	0	0	1	0	0	0	0	0	1	0	1	0	0	3	1	0	0	2	2	3	0	0	4	1	1	0	0	4	0	0
2	0	0	1	0	2	0	0	0	0	4	0	1	1	0	0	0	2	1	1	0	0	0	0	0	0	1	0	0	0	1	2	0	4	0	0	0	0	2	2	2	0	1	1	1	0	0	1	1	0
3	0	0	1	0	1	0	0	0	0	4	0	1	3	0	0	0	2	1	1	0	0	0	0	0	0	1	0	0	0	1	0	0	5	0	0	0	0	2	2	2	0	0	1	1	0	0	0	1	0
3	1	0	1	0	1	0	0	1	1	4	1	1	3	0	0	0	2	1	1	0	0	0	0	0	0	1	0	0	0	1	0	0	4	1	0	0	0	2	2	1	1	0	0	1	1	0	0	1	0
0	2	0	1	2	4	0	0	0	0	4	0	1	1	0	0	0	0	1	3	0	0	0	0	0	1	1	2	0	0	3	0	0	3	1	0	0	0	0	2	1	0	3	1	1	2	0	4	3	0
2	0	2	1	0	4	0	0	0	0	4	0	1	3	0	1	0	1	1	3	0	1	0	0	0	0	0	0	1	0	1	0	0	3	0	0	0	1	0	3	1	0	3	1	1	2	2	3	2	2
1	0	1	1	0	4	0	1	0	0	4	1	1	1	0	0	0	2	0	1	0	0	0	0	0	0	1	0	1	0	1	0	0	1	1	0	0	2	2	2	0	0	3	0	1	0	0	4	1	0
0	0	1	1	0	4	0	1	0	0	3	0	1	1	0	0	0	2	0	1	0	0	1	0	0	0	1	0	1	0	1	0	0	1	1	0	0	2	2	2	0	0	3	0	1	0	0	4	1	0
0	0	0	1	0	4	0	0	0	0	3	2	1	0	0	0	2	0	1	2	0	2	1	0	0	0	1	0	0	0	2	0	0	1	1	0	0	0	0	2	0	0	3	1	3	0	0	4	0	0
1	1	2	1	2	3	0	0	1	1	3	2	1	1	0	0	0	0	0	1	0	0	0	1	0	0	1	0	0	0	3	0	0	1	1	0	0	0	0	2	0	1	2	0	1	3	0	2	1	0
1	0	2	1	2	4	0	0	0	0	3	2	1	1	0	0	0	0	0	1	0	0	0	1	0	0	0	0	1	0	3	0	0	1	1	0	0	1	0	2	0	0	3	0	1	2	0	3	0	0
1	0	0	1	2	4	0	0	0	0	3	2	1	1	0	0	0	0	0	1	0	0	0	1	0	0	0	0	1	0	3	0	0	1	1	0	0	1	0	3	0	0	3	0	1	2	0	3	0	0
2	2	0	1	1	4	0	0	0	0	2	0	1	2	0	0	0	0	1	1	0	0	1	1	0	1	1	2	0	0	0	0	0	3	1	0	0	0	0	2	0	0	3	1	1	0	0	3	0	0
2	2	0	1	0	2	0	0	0	0	5	0	1	0	0	0	0	1	0	1	0	0	0	0	0	1	1	2	0	0	0	0	0	4	0	0	1	0	2	3	1	0	1	2	1	0	0	3	0	0
1	1	1	1	0	1	0	1	1	1	4	1	1	1	0	0	0	2	0	1	0	0	0	0	0	0	1	0	1	0	1	0	0	3	1	0	0	2	3	2	0	1	0	0	1	1	0	2	1	0
3	1	0	1	0	1	0	0	1	1	5	2	1	1	0	0	0	0	0	1	0	0	0	1	0	0	1	0	0	0	3	2	2	4	1	0	0	0	2	3	0	1	0	0	1	3	0	0	1	0
1	1	0	1	0	2	0	0	1	1	5	3	1	1	0	0	2	1	1	1	0	2	0	0	0	0	1	0	0	0	3	0	0	3	1	0	0	0	2	2	1	1	0	0	3	1	0	2	1	0
0	1	1	1	0	1	0	1	1	1	3	0	1	1	0	0	0	2	0	1	0	0	1	0	0	0	1	0	1	0	1	0	0	3	1	0	0	2	3	2	0	1	0	0	1	1	0	2	1	0
0	1	0	1	0	2	0	0	1	1	4	0	1	3	0	0	0	2	1	1	0	0	0	0	0	0	1	0	0	0	1	0	0	3	0	0	0	0	2	2	2	1	0	1	1	1	0	0	1	0
2	0	0	1	0	2	0	0	0	0	4	0	1	3	0	0	0	2	1	1	0	0	0	0	0	0	0	0	1	0	1	0	0	4	0	0	0	1	2	2	2	0	1	1	1	0	0	1	0	0
2	1	0	1	0	1	0	0	1	1	3	0	1	1	0	0	0	2	1	1	0	0	1	0	0	0	1	0	0	0	1	2	0	4	1	0	0	0	2	2	1	1	0	0	1	1	0	0	1	0
0	0	1	1	0	4	0	1	0	0	3	0	1	1	0	0	0	2	0	1	0	2	1	0	0	2	0	0	2	0	1	0	0	1	0	0	1	1	0	2	1	0	3	1	1	0	0	4	0	0
0	0	0	1	0	4	1	2	2	0	4	1	1	1	0	0	0	2	0	1	0	0	0	1	0	2	0	2	1	0	3	0	0	1	0	0	3	1	1	2	1	0	1	1	1	2	0	3	1	0
2	2	1	1	2	3	1	0	0	0	4	1	1	1	0	0	0	2	0	3	0	0	0	0	0	3	1	2	0	0	3	0	0	4	2	0	1	0	0	2	0	0	0	0	1	2	0	3	3	0
1	0	0	1	0	3	1	2	2	0	3	1	1	1	0	0	0	2	0	1	0	0	1	1	0	2	1	2	0	0	3	0	0	2	1	0	3	0	1	2	0	0	0	0	1	2	0	2	2	0
0	1	0	1	0	3	0	0	1	1	3	2	1	1	0	0	2	2	1	1	0	2	2	0	0	2	1	0	0	0	3	0	0	1	1	0	1	0	0	2	0	1	0	0	3	1	0	3	1	1
2	0	0	1	0	4	0	0	0	0	2	0	1	1	0	0	0	3	1	1	0	0	2	0	0	2	0	0	1	0	1	2	0	3	1	0	1	1	0	2	0	0	1	0	1	0	0	3	0	1
0	1	0	1	0	3	0	0	1	1	2	0	1	1	0	0	0	2	1	1	0	0	2	0	0	2	1	0	0	0	1	0	0	3	1	0	1	0	0	2	0	1	0	0	1	1	0	3	1	1
0	0	1	1	2	4	0	0	0	0	3	1	1	0	0	0	0	2	0	2	0	0	1	1	0	2	1	0	0	0	2	0	0	1	1	0	3	0	0	2	1	0	1	1	3	0	0	4	1	0
0	0	2	1	2	4	0	0	0	0	3	1	1	0	0	0	0	0	0	1	0	0	0	1	0	0	1	0	0	0	2	0	0	1	0	0	0	0	0	2	1	0	3	2	1	2	0	3	0	0
1	0	0	1	2	3	0	0	0	0	3	1	1	1	0	0	0	0	0	1	0	0	0	1	0	0	1	0	0	0	3	0	0	2	0	0	0	0	0	3	1	0	2	1	1	2	0	2	1	0
0	0	0	1	2	4	0	0	0	0	3	1	1	0	0	0	0	0	0	1	0	0	0	1	0	0	1	0	0	0	2	0	0	1	0	0	0	0	0	3	1	0	3	2	1	2	0	3	0	0
2	3	0	1	1	3	0	0	1	1	3	0	1	3	0	0	0	0	1	1	0	0	0	1	0	1	1	2	0	0	1	0	0	3	0	0	0	0	0	2	1	1	2	1	1	1	0	2	1	0
2	2	0	1	1	4	0	0	0	0	3	0	1	2	0	0	0	0	1	1	0	0	0	1	0	1	1	2	0	0	0	0	0	3	0	0	0	0	0	2	1	0	3	2	1	0	0	3	0	0
0	0	0	1	0	4	0	0	0	0	3	1	3	1	0	0	0	0	0	3	0	0	1	1	0	0	1	0	0	0	3	0	0	1	1	0	0	0	0	3	0	2	4	0	1	2	0	4	1	0
2	3	0	1	0	1	0	0	1	1	5	0	1	1	0	0	0	1	0	1	0	0	0	0	0	1	1	2	0	0	1	0	0	4	0	0	1	0	2	3	1	1	0	1	1	1	0	2	1	0
0	1	1	1	0	1	0	1	1	1	4	0	1	1	0	0	0	2	0	1	0	0	0	0	0	0	1	0	1	0	1	0	0	3	0	0	0	2	3	2	1	1	0	1	1	1	0	2	1	0
1	0	0	1	0	2	0	0	0	0	5	2	1	1	0	0	2	1	1	1	0	2	0	0	0	0	1	0	0	0	3	0	0	4	0	0	0	0	2	2	2	0	0	1	3	0	0	2	1	0
3	0	2	1	0	2	0	0	0	0	5	1	1	3	0	1	0	2	1	3	0	1	0	0	0	0	0	0	1	0	1	0	0	4	1	0	0	1	2	3	1	0	1	0	1	2	2	1	2	2
2	0	0	1	0	2	0	0	0	0	4	1	1	0	0	0	0	0	0	1	0	0	1	1	0	0	1	0	0	0	2	2	2	4	1	0	0	0	2	3	0	0	1	1	1	2	0	1	0	0
2	1	2	1	0	1	0	0	1	1	4	0	1	3	0	1	0	2	1	3	0	1	1	0	0	0	1	0	0	0	1	0	0	4	1	0	0	0	2	3	1	1	0	0	1	3	2	0	3	2
0	0	0	1	0	2	0	0	0	0	3	0	1	1	0	0	0	2	1	1	0	0	1	0	0	0	1	0	0	0	1	0	0	3	1	0	0	2	3	2	2	0	1	0	1	0	0	3	1	0
0	2	1	1	2	4	1	0	0	0	4	0	1	1	0	0	0	2	0	3	0	0	0	0	0	3	1	2	0	0	3	0	0	3	1	0	1	0	0	2	1	0	1	1	1	2	0	4	3	0
0	0	1	1	0	4	0	1	0	0	3	0	1	0	0	0	0	2	0	1	0	2	1	0	0	2	1	0	1	0	0	0	0	1	0	0	1	0	0	2	1	0	3	2	1	0	0	4	0	0
0	0	0	1	0	4	1	2	2	0	4	1	1	1	0	0	0	2	0	1	0	0	0	1	0	2	1	2	0	0	3	0	0	1	0	0	3	0	1	2	1	0	1	1	1	2	0	3	2	0
2	2	1	1	1	4	1	0	0	0	3	0	1	3	0	0	0	2	0	1	0	0	0	1	0	3	0	2	1	0	1	0	0	3	0	0	1	1	0	2	1	0	1	1	1	0	0	3	0	0
0	0	1	1	2	4	0	0	0	0	4	1	1	1	0	0	0	2	0	2	0	0	0	1	0	2	1	0	0	0	3	0	0	1	0	0	3	0	0	2	2	0	1	1	3	0	0	4	2	0
1	0	1	1	0	4	0	1	0	0	3	1	1	1	0	0	0	2	0	1	0	2	1	0	0	2	1	0	1	0	1	0	0	1	1	0	1	0	0	2	0	0	3	0	1	0	0	4	1	0
1	0	0	1	0	4	0	0	0	0	4	3	1	1	0	0	2	2	1	1	0	2	1	0	0	2	1	0	0	0	3	0	0	1	1	0	1	0	0	2	0	0	1	0	3	0	0	4	1	1
1	0	0	1	0	4	1	0	0	0	4	2	3	1	0	0	0	2	0	3	0	0	0	1	0	2	1	0	0	0	3	0	0	1	1	0	1	0	1	3	0	2	3	0	1	2	0	4	2	0
3	3	0	1	0	3	0	0	3	1	4	1	1	1	0	0	2	2	0	3	0	0	1	0	0	2	1	0	0	0	1	0	0	3	1	0	1	1	2	3	1	1	2	1	1	1	0	3	1	0
0	0	0	1	0	4	0	0	0	0	3	2	1	0	0	0	2	2	1	1	0	2	2	0	0	2	1	0	0	0	2	0	0	1	1	0	1	0	0	2	0	0	1	1	3	0	0	4	0	1
3	0	2	1	0	3	0	0	0	0	3	0	1	3	0	1	0	3	1	3	0	0	2	0	0	2	1	0	0	0	1	0	0	4	1	0	1	0	0	3	0	0	0	0	1	2	2	2	3	2
2	0	0	1	0	4	0	0	0	0	4	1	1	1	0	0	0	0	0	1	0	0	0	1	0	0	0	0	1	0	3	2	2	3	0	0	0	1	0	3	1	0	3	1	1	2	0	3	0	0
0	3	0	1	2	3	0	0	1	1	4	0	1	1	0	0	0	0	1	3	0	0	0	0	0	1	1	2	0	0	3	0	0	3	1	0	0	0	0	2	1	1	2	1	1	3	0	3	3	0
2	1	2	1	0	3	0	0	1	1	4	0	1	3	0	1	0	1	1	3	0	1	0	0	0	0	1	0	0	0	1	0	0	3	0	0	0	0	0	3	1	1	2	1	1	3	2	2	3	2
1	0	0	1	0	4	0	0	0	0	4	3	1	1	0	0	2	0	1	2	0	2	0	0	0	0	1	0	0	0	3	0	0	1	1	0	0	0	0	2	0	0	3	0	3	0	0	4	1	0
0	1	1	1	0	3	0	1	1	1	3	0	1	1	0	0	0	2	0	1	0	0	1	0	0	0	1	0	1	0	1	0	0	1	1	0	0	2	2	2	0	1	2	0	1	1	0	3	1	0
2	0	2	1	2	3	0	0	0	0	3	2	1	1	0	0	0	0	0	1	0	0	0	1	0	0	1	0	0	0	3	0	0	2	1	0	0	0	0	2	0	0	2	0	1	2	0	2	1	0
0	0	2	1	2	4	0	0	0	0	2	1	1	0	0	0	0	0	0	1	0	0	1	1	0	0	1	0	0	0	2	0	0	1	1	0	0	0	0	2	0	0	3	1	1	2	0	3	0	0
2	0	0	1	0	2	0	0	0	0	5	1	1	0	0	0	0	0	0	1	0	0	0	1	0	0	1	0	0	0	2	2	2	4	0	0	0	0	2	3	1	0	1	2	1	2	0	1	0	0
0	1	0	1	0	2	0	0	1	1	5	2	1	1	0	0	2	1	1	1	0	2	0	0	0	0	1	0	0	0	3	0	0	3	0	0	0	0	2	2	2	1	0	1	3	1	0	2	1	0
2	1	2	1	0	1	0	0	1	1	5	0	1	3	0	1	0	2	1	3	0	1	0	0	0	0	1	0	0	0	1	0	0	4	0	0	0	0	2	3	2	1	0	1	1	3	2	0	3	2
4	0	0	1	0	1	0	0	0	0	5	2	1	1	0	0	0	0	0	1	0	0	0	1	0	0	1	0	0	0	3	2	2	5	1	0	0	0	2	3	0	0	0	0	1	2	0	0	1	0
1	3	0	1	2	1	0	0	1	1	5	1	1	1	0	0	0	0	0	3	0	0	0	0	0	1	1	2	0	0	3	0	0	4	2	0	0	0	2	2	0	1	0	0	1	3	0	2	3	0
1	2	0	1	2	1	0	0	0	0	4	0	1	1	0	0	0	0	0	3	0	0	1	0	0	1	1	2	0	0	3	0	0	5	2	0	0	0	2	2	0	0	0	0	1	2	0	2	3	0
0	0	0	1	0	3	0	0	0	0	4	0	1	3	0	0	0	2	1	1	0	0	0	0	0	0	1	0	0	0	1	0	0	3	0	0	0	0	2	2	2	0	1	1	1	0	0	1	1	0
0	0	1	1	0	4	0	1	0	0	3	0	1	0	0	0	0	3	0	1	0	0	1	0	0	2	1	0	1	0	0	0	0	1	0	0	1	2	2	2	1	0	1	2	1	0	0	4	0	0
1	0	0	1	0	3	1	0	0	0	4	1	3	1	0	0	0	2	0	3	0	0	0	1	0	2	1	0	0	0	3	0	0	2	0	0	1	0	1	3	1	2	2	1	1	2	0	3	2	0
0	0	0	1	0	4	1	0	0	0	4	1	3	1	0	0	0	2	0	3	0	0	0	1	0	2	0	0	1	0	3	0	0	1	0	0	1	1	1	3	1	2	3	1	1	2	0	4	1	0
3	2	1	1	1	3	1	0	0	0	3	0	1	3	0	0	0	2	0	1	0	0	0	1	0	3	1	2	0	0	1	0	0	4	0	0	1	0	0	2	1	0	0	1	1	0	0	2	1	0
0	0	1	1	2	4	0	0	0	0	4	1	1	1	0	0	0	2	0	2	0	0	0	1	0	2	0	0	1	0	3	0	0	1	0	0	3	1	0	2	2	0	1	1	3	0	0	4	1	0
4	0	0	1	0	3	1	0	0	0	4	2	1	1	0	0	0	2	0	1	0	0	0	1	0	2	1	0	0	0	3	2	2	4	1	0	1	0	1	3	0	0	0	0	1	2	0	2	2	0
1	0	0	1	0	4	1	2	2	0	4	2	1	0	0	0	0	2	0	1	0	0	0	1	0	2	1	2	0	0	2	0	0	1	1	0	3	0	1	2	0	0	1	1	1	2	0	3	1	0
1	2	1	1	2	4	1	0	0	0	4	1	1	0	0	0	0	2	0	3	0	0	0	0	0	3	1	2	0	0	2	0	0	3	2	0	1	0	0	2	0	0	1	1	1	2	0	4	2	0
3	0	2	1	0	4	0	0	0	0	4	1	1	2	0	1	0	3	1	3	0	0	1	0	0	2	1	0	0	0	0	0	0	3	1	0	1	0	0	3	0	0	1	1	1	2	2	3	2	2
3	2	1	1	1	4	1	0	0	0	3	1	1	3	0	0	0	2	0	1	0	0	0	1	0	3	1	2	0	0	1	0	0	3	1	0	1	0	0	2	0	0	1	0	1	0	0	3	1	0
0	0	0	1	0	4	0	0	0	0	3	2	1	1	0	0	2	2	1	1	0	2	2	0	0	2	0	0	1	0	3	0	0	1	1	0	1	1	0	2	0	0	1	0	3	0	0	4	0	1
0	2	1	1	2	4	1	0	0	0	3	0	1	1	0	0	0	2	0	3	0	0	1	0	0	3	1	2	0	0	3	0	0	3	2	0	1	0	0	2	0	0	1	0	1	2	0	4	3	0
2	1	0	1	0	3	0	0	1	1	2	0	1	1	0	0	0	3	1	1	0	0	2	0	0	2	1	0	0	0	1	2	0	3	1	0	1	0	0	2	0	1	0	0	1	1	0	2	1	1
2	0	0	1	0	4	0	0	0	0	2	0	1	0	0	0	0	3	1	1	0	0	2	0	0	2	1	0	0	0	0	2	0	3	1	0	1	0	0	2	0	0	1	1	1	0	0	3	0	1
0	0	0	1	0	4	0	0	0	0	4	2	1	1	0	0	2	0	1	2	0	2	0	0	0	0	0	0	1	0	3	0	0	1	0	0	0	1	0	2	1	0	3	1	3	0	0	4	0	0
1	2	0	1	2	4	0	0	0	0	4	1	1	1	0	0	0	0	1	3	0	0	0	0	0	1	0	2	1	0	3	0	0	3	2	0	0	1	0	2	0	0	3	0	1	2	0	4	2	0
3	2	0	1	1	3	0	0	0	0	3	0	1	3	0	0	0	0	1	1	0	0	0	1	0	1	1	2	0	0	1	0	0	4	0	0	0	0	0	2	1	0	2	1	1	0	0	2	1	0
1	0	2	1	2	4	0	0	0	0	3	2	1	0	0	0	0	0	0	1	0	0	0	1	0	0	1	0	0	0	2	0	0	1	1	0	0	0	0	2	0	0	3	1	1	2	0	3	0	0
1	1	0	1	0	3	0	0	1	1	4	2	3	1	0	0	0	0	0	3	0	0	0	1	0	0	1	0	0	0	3	0	0	1	1	0	0	0	0	3	0	3	3	0	1	3	0	3	1	0
3	2	0	1	0	4	0	0	2	0	4	1	1	1	0	0	2	0	0	3	0	0	0	0	0	0	1	0	0	0	1	0	0	3	1	0	0	1	2	3	0	0	4	1	1	0	0	4	1	0
2	2	0	1	2	1	0	0	0	0	5	1	1	1	0	0	0	0	0	3	0	0	0	0	0	1	1	2	0	0	3	0	0	5	2	0	0	0	2	2	0	0	0	0	1	2	0	2	3	0
3	0	2	1	0	2	0	0	0	0	5	1	1	2	0	1	0	2	1	3	0	1	0	0	0	0	1	0	0	0	0	0	0	4	1	0	0	0	2	3	1	0	1	1	1	2	2	1	2	2
2	2	0	1	0	2	0	0	0	0	4	0	1	0	0	0	0	1	0	1	0	0	1	0	0	1	1	2	0	0	0	0	0	4	1	0	1	0	2	3	0	0	1	1	1	0	0	3	0	0
2	0	0	1	0	2	0	0	0	0	4	0	1	1	0	0	0	2	1	1	0	0	0	0	0	0	0	0	1	0	1	2	0	4	0	0	0	1	2	2	2	0	1	1	1	0	0	1	0	0
1	1	0	1	0	2	0	0	1	1	4	1	1	3	0	0	0	2	1	1	0	0	0	0	0	0	1	0	0	0	1	0	0	3	1	0	0	0	2	2	1	1	0	0	1	1	0	0	1	0
3	0	0	1	0	2	0	0	0	0	4	1	1	3	0	0	0	2	1	1	0	0	0	0	0	0	0	0	1	0	1	0	0	4	1	0	0	1	2	2	1	0	1	0	1	0	0	1	0	0
1	2	1	1	2	3	1	0	0	0	4	0	1	1	0	0	0	2	0	3	0	0	0	0	0	3	1	2	0	0	3	0	0	4	1	0	1	0	0	2	1	0	0	1	1	2	0	3	3	0
1	0	0	1	0	3	1	2	2	0	4	1	1	1	0	0	0	2	0	1	0	0	0	1	0	2	1	2	0	0	3	0	0	2	0	0	3	0	1	2	1	0	0	1	1	2	0	2	2	0
0	0	0	1	0	4	1	0	0	0	3	2	1	1	0	0	2	2	0	1	0	0	0	1	0	2	1	0	0	0	3	0	0	1	0	0	1	0	1	2	1	0	1	1	1	2	0	3	2	0
2	3	0	1	0	3	0	0	3	1	4	0	1	1	0	0	2	2	0	3	0	0	1	0	0	2	1	0	0	0	1	0	0	3	0	0	1	1	2	3	2	1	2	2	1	1	0	3	1	0
1	3	1	1	2	3	1	0	1	1	4	1	1	1	0	0	0	2	0	3	0	0	0	0	0	3	1	2	0	0	3	0	0	3	2	0	1	0	0	2	0	1	0	0	1	3	0	3	3	0
1	0	0	1	0	4	0	0	0	0	3	1	1	3	0	0	0	3	1	1	0	0	1	0	0	2	1	0	0	0	1	0	0	1	1	0	1	0	0	2	0	0	1	0	1	0	0	3	1	1
4	0	0	1	0	3	0	0	0	0	3	1	1	3	0	0	0	3	1	1	0	0	1	0	0	2	1	0	0	0	1	0	0	4	1	0	1	0	0	2	0	0	0	0	1	0	0	2	1	1
3	0	0	1	0	3	1	0	0	0	3	1	1	1	0	0	0	2	0	1	0	0	1	1	0	2	1	0	0	0	3	2	2	4	1	0	1	0	1	3	0	0	0	0	1	2	0	2	2	0
0	0	0	1	0	4	0	0	0	0	2	0	1	0	0	0	0	2	1	1	0	0	2	0	0	2	1	0	0	0	0	0	0	3	1	0	1	0	0	2	0	0	1	1	1	0	0	4	0	1
0	0	0	1	0	4	1	0	0	0	3	1	3	0	0	0	0	2	0	3	0	0	1	1	0	2	1	0	0	0	2	0	0	1	1	0	1	0	1	3	0	2	3	1	1	2	0	4	1	0
0	0	1	1	2	4	0	0	0	0	3	1	1	1	0	0	0	2	0	2	0	0	1	1	0	2	0	0	1	0	3	0	0	1	1	0	3	1	0	2	1	0	1	0	3	0	0	4	1	0
0	2	0	1	2	4	0	0	0	0	4	0	1	0	0	0	0	0	1	3	0	0	0	0	0	1	1	2	0	0	2	0	0	3	1	0	0	0	0	2	1	0	3	2	1	2	0	4	2	0
0	1	0	1	0	3	0	0	1	1	4	1	3	1	0	0	0	0	0	3	0	0	0	1	0	0	1	0	0	0	3	0	0	1	0	0	0	0	0	3	1	3	3	1	1	3	0	3	1	0
2	2	0	1	0	4	0	0	2	0	4	0	1	0	0	0	2	0	0	3	0	0	0	0	0	0	1	0	0	0	0	0	0	3	0	0	0	1	2	3	1	0	4	3	1	0	0	4	0	0
1	0	0	1	0	4	0	0	0	0	4	2	3	1	0	0	0	0	0	3	0	0	0	1	0	0	0	0	1	0	3	0	0	1	1	0	0	1	0	3	0	2	4	0	1	2	0	4	0	0
2	2	0	1	0	2	0	0	0	0	5	0	1	1	0	0	0	1	0	1	0	0	0	0	0	1	1	2	0	0	1	0	0	4	0	0	1	0	2	3	1	0	1	1	1	0	0	3	1	0
0	2	0	1	2	2	0	0	0	0	5	0	1	1	0	0	0	0	0	3	0	0	0	0	0	1	1	2	0	0	3	0	0	4	1	0	0	0	2	2	1	0	1	1	1	2	0	3	3	0
2	0	2	1	0	2	0	0	0	0	5	0	1	3	0	1	0	2	1	3	0	1	0	0	0	0	0	0	1	0	1	0	0	4	0	0	0	1	2	3	2	0	1	1	1	2	2	1	2	2
1	0	0	1	0	3	0	0	0	0	5	3	1	1	0	0	2	1	1	1	0	2	0	0	0	0	1	0	0	0	3	0	0	3	1	0	0	0	2	2	1	0	1	0	3	0	0	3	1	0
1	2	0	1	2	2	0	0	0	0	5	1	1	1	0	0	0	0	0	3	0	0	0	0	0	1	1	2	0	0	3	0	0	4	2	0	0	0	2	2	0	0	1	0	1	2	0	3	3	0
0	0	0	1	0	2	0	0	0	0	4	0	1	0	0	0	0	2	1	1	0	0	0	0	0	0	1	0	0	0	0	0	0	3	0	0	0	2	3	2	3	0	1	2	1	0	0	3	0	0
2	0	0	1	0	2	0	0	0	0	3	0	1	1	0	0	0	2	1	1	0	0	1	0	0	0	0	0	1	0	1	2	0	4	1	0	0	1	2	2	1	0	1	0	1	0	0	1	0	0
2	0	0	1	0	2	0	0	0	0	3	0	1	0	0	0	0	2	1	1	0	0	1	0	0	0	1	0	0	0	0	2	0	4	1	0	0	0	2	2	1	0	1	1	1	0	0	1	0	0
0	0	0	1	0	4	0	0	0	0	4	2	1	0	0	0	2	2	1	1	0	2	1	0	0	2	1	0	0	0	2	0	0	1	0	0	1	0	0	2	1	0	1	2	3	0	0	4	0	1
0	0	0	1	0	4	1	0	0	0	3	2	1	0	0	0	2	2	0	1	0	0	0	1	0	2	1	0	0	0	2	0	0	1	0	0	1	0	1	2	1	0	1	2	1	2	0	3	1	0
0	1	0	1	0	3	1	0	1	1	4	1	3	1	0	0	0	2	0	3	0	0	0	1	0	2	1	0	0	0	3	0	0	1	0	0	1	0	1	3	1	3	2	1	1	3	0	3	2	0
1	0	0	1	0	4	0	0	0	0	4	3	1	1	0	0	2	2	1	1	0	2	1	0	0	2	0	0	1	0	3	0	0	1	1	0	1	1	0	2	0	0	1	0	3	0	0	4	0	1
0	0	0	1	0	4	1	2	2	0	3	1	1	0	0	0	0	2	0	1	0	0	1	1	0	2	1	2	0	0	2	0	0	1	1	0	3	0	1	2	0	0	1	1	1	2	0	3	1	0
2	1	0	1	0	3	0	0	1	1	2	0	1	3	0	0	0	3	1	1	0	0	2	0	0	2	1	0	0	0	1	0	0	3	1	0	1	0	0	2	0	1	0	0	1	1	0	2	1	1
2	0	0	1	0	4	0	0	0	0	2	0	1	3	0	0	0	3	1	1	0	0	2	0	0	2	0	0	1	0	1	0	0	3	1	0	1	1	0	2	0	0	1	0	1	0	0	3	0	1
0	0	0	1	0	4	1	0	0	0	2	2	1	1	0	0	2	2	0	1	0	0	1	1	0	2	0	0	1	0	3	0	0	1	1	0	1	1	1	2	0	0	1	0	1	2	0	3	1	0
1	0	0	1	0	3	0	0	0	0	4	2	1	1	0	0	2	0	1	2	0	2	0	0	0	0	1	0	0	0	3	0	0	2	0	0	0	0	0	2	1	0	2	1	3	0	0	3	1	0
3	2	0	1	0	4	0	0	0	0	4	1	1	0	0	0	0	1	0	1	0	0	0	0	0	1	1	2	0	0	0	0	0	3	1	0	0	0	0	3	0	0	3	1	1	0	0	4	0	0
1	0	1	1	0	4	0	1	0	0	4	1	1	1	0	0	0	2	0	1	0	0	0	0	0	0	0	0	2	0	1	0	0	1	1	0	0	3	2	2	0	0	3	0	1	0	0	4	0	0
3	0	2	1	0	4	0	0	0	0	4	1	1	2	0	1	0	1	1	3	0	1	0	0	0	0	1	0	0	0	0	0	0	3	1	0	0	0	0	3	0	0	3	1	1	2	2	3	2	2
0	2	0	1	2	4	0	0	0	0	3	0	1	1	0	0	0	0	1	3	0	0	1	0	0	1	1	2	0	0	3	0	0	3	2	0	0	0	0	2	0	0	3	0	1	2	0	4	3	0
1	0	2	1	2	3	0	0	0	0	3	1	1	1	0	0	0	0	0	1	0	0	0	1	0	0	1	0	0	0	3	0	0	2	0	0	0	0	0	2	1	0	2	1	1	2	0	2	1	0
2	2	0	1	0	4	0	0	2	0	4	0	1	1	0	0	2	0	0	3	0	0	0	0	0	0	0	0	1	0	1	0	0	3	0	0	0	2	2	3	1	0	4	2	1	0	0	4	0	0
1	0	2	1	2	4	0	0	0	0	3	2	1	1	0	0	0	0	0	1	0	0	0	1	0	0	1	0	0	0	3	0	0	1	1	0	0	0	0	2	0	0	3	0	1	2	0	3	1	0
3	2	0	1	0	4	0	0	2	0	4	1	1	1	0	0	2	0	0	3	0	0	0	0	0	0	0	0	1	0	1	0	0	3	1	0	0	2	2	3	0	0	4	1	1	0	0	4	0	0
1	1	0	1	2	3	0	0	1	1	3	2	1	1	0	0	0	0	0	1	0	0	0	1	0	0	1	0	0	0	3	0	0	1	1	0	0	0	0	3	0	1	2	0	1	3	0	2	1	0
3	2	0	1	1	4	0	0	0	0	3	1	1	2	0	0	0	0	1	1	0	0	0	1	0	1	1	2	0	0	0	0	0	3	1	0	0	0	0	2	0	0	3	1	1	0	0	3	0	0
1	0	2	1	2	3	0	0	0	0	2	1	1	1	0	0	0	0	0	1	0	0	1	1	0	0	1	0	0	0	3	0	0	2	1	0	0	0	0	2	0	0	2	0	1	2	0	2	1	0
0	0	1	1	0	2	0	1	0	0	3	0	1	1	0	0	0	2	0	1	0	0	1	0	0	0	1	0	1	0	1	0	0	3	1	0	0	2	3	2	0	0	1	0	1	0	0	3	1	0
2	0	2	1	0	2	0	0	0	0	4	0	1	3	0	1	0	2	1	3	0	1	1	0	0	0	0	0	1	0	1	0	0	4	1	0	0	1	2	3	1	0	1	0	1	2	2	1	2	2
1	0	0	1	0	3	0	0	0	0	4	1	1	3	0	0	0	2	1	1	0	0	0	0	0	0	0	0	1	0	1	0	0	3	1	0	0	1	2	2	1	0	1	0	1	0	0	1	0	0
1	1	0	1	0	2	0	0	1	1	4	1	1	1	0	0	0	1	1	1	0	0	0	0	0	0	1	0	0	0	1	0	0	4	1	0	0	0	2	2	1	1	0	0	1	1	0	2	1	0
2	0	0	1	0	1	0	0	0	0	4	1	1	1	0	0	0	2	1	1	0	0	0	0	0	0	1	0	0	0	1	0	0	4	1	0	0	2	3	2	2	0	0	0	1	0	0	2	1	0
2	1	0	1	0	1	0	0	1	1	3	0	1	3	0	0	0	2	1	1	0	0	1	0	0	0	1	0	0	0	1	0	0	4	1	0	0	0	2	2	1	1	0	0	1	1	0	0	1	0
2	1	0	1	0	3	0	0	1	1	3	0	1	3	0	0	0	3	1	1	0	0	1	0	0	2	1	0	0	0	1	0	0	3	0	0	1	0	0	2	1	1	0	1	1	1	0	2	1	1
0	0	0	1	2	4	1	0	0	0	3	1	1	1	0	0	0	2	0	1	0	0	0	1	0	2	0	0	1	0	3	0	0	1	0	0	1	1	1	3	1	0	1	1	1	2	0	3	1	0
1	0	0	1	0	4	0	0	0	0	3	1	1	1	0	0	0	2	1	1	0	0	1	0	0	2	0	0	1	0	1	0	0	3	1	0	1	1	0	2	0	0	1	0	1	0	0	4	0	1
2	0	0	1	0	4	0	0	0	0	4	1	1	1	0	0	0	0	0	1	0	0	0	1	0	0	1	0	0	0	3	2	2	3	0	0	0	0	0	3	1	0	3	1	1	2	0	3	1	0
1	2	0	1	2	4	0	0	0	0	4	1	1	1	0	0	0	0	1	3	0	0	0	0	0	1	1	2	0	0	3	0	0	3	2	0	0	0	0	2	0	0	3	0	1	2	0	4	3	0
3	1	2	1	0	3	0	0	1	1	4	1	1	3	0	1	0	1	1	3	0	1	0	0	0	0	1	0	0	0	1	0	0	3	1	0	0	0	0	3	0	1	2	0	1	3	2	2	3	2
0	0	0	1	0	3	0	0	0	0	5	2	1	1	0	0	2	1	1	1	0	2	0	0	0	0	1	0	0	0	3	0	0	3	0	0	0	0	2	2	2	0	1	1	3	0	0	3	1	0
2	0	2	1	0	2	0	0	0	0	4	0	1	3	0	1	0	2	1	3	0	1	1	0	0	0	1	0	0	0	1	0	0	4	1	0	0	0	2	3	1	0	1	0	1	2	2	1	3	2
0	0	0	1	0	3	0	0	0	0	4	0	1	2	0	0	0	2	1	1	0	0	0	0	0	0	1	0	0	0	0	0	0	3	0	0	0	0	2	2	2	0	1	2	1	0	0	1	0	0
3	0	0	1	0	2	0	0	0	0	4	1	1	2	0	0	0	2	1	1	0	0	0	0	0	0	1	0	0	0	0	0	0	4	1	0	0	0	2	2	1	0	1	1	1	0	0	1	0	0
0	0	0	1	0	3	0	0	0	0	3	0	1	0	0	0	0	1	1	1	0	0	1	0	0	0	1	0	0	0	0	0	0	4	1	0	0	0	2	2	1	0	1	1	1	0	0	3	0	0
0	0	0	1	0	4	0	0	0	0	3	0	1	1	0	0	0	2	1	1	0	0	1	0	0	2	0	0	1	0	1	0	0	3	0	0	1	1	0	2	1	0	1	1	1	0	0	4	0	1
0	1	0	1	2	3	1	0	1	1	3	1	1	1	0	0	0	2	0	1	0	0	0	1	0	2	1	0	0	0	3	0	0	1	0	0	1	0	1	3	1	1	0	1	1	3	0	2	2	0
2	2	1	1	1	4	1	0	0	0	3	0	1	2	0	0	0	2	0	1	0	0	0	1	0	3	1	2	0	0	0	0	0	3	0	0	1	0	0	2	1	0	1	2	1	0	0	3	0	0
1	1	1	1	0	3	0	1	1	1	3	1	1	1	0	0	0	3	0	1	0	0	1	0	0	2	1	0	1	0	1	0	0	1	1	0	1	2	2	2	0	1	0	0	1	1	0	3	1	0
4	2	1	1	1	3	1	0	0	0	3	1	1	3	0	0	0	2	0	1	0	0	0	1	0	3	1	2	0	0	1	0	0	4	1	0	1	0	0	2	0	0	0	0	1	0	0	2	1	0
0	0	1	1	0	4	0	1	0	0	4	0	1	0	0	0	0	2	0	1	0	0	0	0	0	0	1	0	1	0	0	0	0	1	0	0	0	2	2	2	1	0	3	2	1	0	0	4	0	0
3	0	2	1	0	3	0	0	0	0	4	0	1	3	0	1	0	1	1	3	0	1	0	0	0	0	1	0	0	0	1	0	0	4	0	0	0	0	0	3	1	0	2	1	1	2	2	2	3	2
0	1	0	1	0	3	0	0	1	1	3	2	1	1	0	0	2	0	1	2	0	2	1	0	0	0	1	0	0	0	3	0	0	1	1	0	0	0	0	2	0	1	2	0	3	1	0	3	1	0
0	0	0	1	0	4	0	0	0	0	3	2	1	1	0	0	2	0	1	2	0	2	1	0	0	0	0	0	1	0	3	0	0	1	1	0	0	1	0	2	0	0	3	0	3	0	0	4	0	0
2	2	0	1	0	4	0	0	2	0	3	0	1	0	0	0	2	0	0	3	0	0	1	0	0	0	1	0	0	0	0	0	0	3	1	0	0	1	2	3	0	0	4	2	1	0	0	4	0	0
2	0	0	1	0	2	0	0	0	0	5	1	1	1	0	0	0	0	0	1	0	0	0	1	0	0	1	0	0	0	3	2	2	4	0	0	0	0	2	3	1	0	1	1	1	2	0	1	1	0
0	0	0	1	0	3	0	0	0	0	5	2	1	1	0	0	2	1	1	1	0	2	0	0	0	0	0	0	1	0	3	0	0	3	0	0	0	1	2	2	2	0	1	1	3	0	0	3	0	0
0	0	0	1	0	3	0	0	0	0	5	2	1	0	0	0	2	1	1	1	0	2	0	0	0	0	1	0	0	0	2	0	0	3	0	0	0	0	2	2	2	0	1	2	3	0	0	3	0	0
3	0	0	1	0	2	0	0	0	0	5	2	1	1	0	0	0	0	0	1	0	0	0	1	0	0	0	0	1	0	3	2	2	4	1	0	0	1	2	3	0	0	1	0	1	2	0	1	0	0
3	0	0	1	0	2	0	0	0	0	5	2	1	0	0	0	0	0	0	1	0	0	0	1	0	0	1	0	0	0	2	2	2	4	1	0	0	0	2	3	0	0	1	1	1	2	0	1	0	0
0	2	0	1	2	2	0	0	0	0	4	0	1	0	0	0	0	0	0	3	0	0	1	0	0	1	1	2	0	0	2	0	0	4	2	0	0	0	2	2	0	0	1	1	1	2	0	3	2	0
0	1	0	1	0	2	0	0	1	1	4	0	1	1	0	0	0	1	1	1	0	0	0	0	0	0	1	0	0	0	1	0	0	4	0	0	0	0	2	2	2	1	0	1	1	1	0	2	1	0
1	0	0	1	0	3	0	0	0	0	4	1	1	3	0	0	0	2	1	1	0	0	0	0	0	0	1	0	0	0	1	0	0	3	1	0	0	0	2	2	1	0	1	0	1	0	0	1	1	0
2	0	0	1	0	2	0	0	0	0	4	1	1	3	0	0	0	2	1	1	0	0	0	0	0	0	1	0	0	0	1	0	0	4	1	0	0	0	2	2	1	0	0	0	1	0	0	0	1	0
3	0	0	1	0	1	0	0	0	0	3	0	1	1	0	0	0	2	1	1	0	0	1	0	0	0	1	0	0	0	1	2	0	5	1	0	0	0	2	2	1	0	0	0	1	0	0	0	1	0
0	1	1	1	0	3	0	1	1	1	3	0	1	1	0	0	0	3	0	1	0	0	1	0	0	2	1	0	1	0	1	0	0	1	0	0	1	2	2	2	1	1	0	1	1	1	0	3	1	0
0	0	0	1	0	4	0	0	0	0	4	2	1	1	0	0	2	2	1	1	0	2	1	0	0	2	1	0	0	0	3	0	0	1	0	0	1	0	0	2	1	0	1	1	3	0	0	4	1	1
0	1	1	1	2	3	0	0	1	1	4	1	1	1	0	0	0	2	0	2	0	0	0	1	0	2	1	0	0	0	3	0	0	1	0	0	3	0	0	2	2	1	0	1	3	1	0	3	2	0
3	0	0	1	0	4	0	0	0	0	3	1	1	2	0	0	0	3	1	1	0	0	1	0	0	2	1	0	0	0	0	0	0	3	1	0	1	0	0	2	0	0	1	1	1	0	0	3	0	1
1	1	0	1	0	3	1	0	1	1	3	3	1	1	0	0	2	2	0	1	0	0	0	1	0	2	1	0	0	0	3	0	0	1	1	0	1	0	1	2	0	1	0	0	1	3	0	2	2	0
2	0	0	1	2	3	1	0	0	0	3	2	1	1	0	0	0	2	0	1	0	0	0	1	0	2	1	0	0	0	3	0	0	2	1	0	1	0	1	3	0	0	0	0	1	2	0	2	2	0
1	0	0	1	2	4	1	0	0	0	3	2	1	0	0	0	0	2	0	1	0	0	0	1	0	2	1	0	0	0	2	0	0	1	1	0	1	0	1	3	0	0	1	1	1	2	0	3	1	0
1	0	1	1	0	3	0	1	0	0	2	0	1	1	0	0	0	3	0	1	0	0	2	0	0	2	1	0	1	0	1	0	0	2	1	0	1	2	2	2	0	0	0	0	1	0	0	3	1	0
2	2	0	1	0	4	0	0	2	0	3	0	1	1	0	0	2	2	0	3	0	0	2	0	0	2	1	0	0	0	1	0	0	3	1	0	1	1	2	3	1	0	3	1	1	0	0	4	1	0
0	1	1	1	0	3	0	1	1	1	4	0	1	1	0	0	0	2	0	1	0	0	0	0	0	0	1	0	1	0	1	0	0	1	0	0	0	2	2	2	1	1	2	1	1	1	0	3	1	0
2	0	2	1	0	4	0	0	0	0	3	0	1	2	0	1	0	1	1	3	0	1	1	0	0	0	1	0	0	0	0	0	0	3	1	0	0	0	0	3	0	0	3	1	1	2	2	3	2	2
0	0	0	1	2	4	0	0	0	0	2	1	1	1	0	0	0	0	0	1	0	0	1	1	0	0	0	0	1	0	3	0	0	1	1	0	0	1	0	3	0	0	3	0	1	2	0	3	0	0
3	2	0	1	0	1	0	0	0	0	5	0	1	1	0	0	0	1	0	1	0	0	0	0	0	1	1	2	0	0	1	0	0	5	0	0	1	0	2	3	1	0	0	1	1	0	0	2	1	0
0	0	1	1	0	2	0	1	0	0	4	0	1	1	0	0	0	2	0	1	0	0	0	0	0	0	1	0	1	0	1	0	0	3	0	0	0	2	3	2	1	0	1	1	1	0	0	3	1	0
0	2	0	1	2	2	0	0	0	0	5	0	1	0	0	0	0	0	0	3	0	0	0	0	0	1	1	2	0	0	2	0	0	4	1	0	0	0	2	2	1	0	1	2	1	2	0	3	2	0
3	1	2	1	0	1	0	0	1	1	5	1	1	3	0	1	0	2	1	3	0	1	0	0	0	0	1	0	0	0	1	0	0	4	1	0	0	0	2	3	1	1	0	0	1	3	2	0	3	2
1	0	0	1	0	2	0	0	0	0	4	0	1	3	0	0	0	2	1	1	0	0	0	0	0	0	1	0	0	0	1	0	0	4	0	0	0	0	2	2	2	0	0	1	1	0	0	0	1	0
3	0	0	1	0	2	0	0	0	0	4	1	1	3	0	0	0	2	1	1	0	0	0	0	0	0	1	0	0	0	1	0	0	4	1	0	0	0	2	2	1	0	1	0	1	0	0	1	1	0
0	0	0	1	0	3	0	0	0	0	3	0	1	1	0	0	0	1	1	1	0	0	1	0	0	0	0	0	1	0	1	0	0	4	1	0	0	1	2	2	1	0	1	0	1	0	0	3	0	0
0	1	0	1	0	3	0	0	1	1	3	0	1	3	0	0	0	3	1	1	0	0	1	0	0	2	1	0	0	0	1	0	0	1	0	0	1	0	0	2	1	1	0	1	1	1	0	2	1	1
2	0	0	1	0	4	0	0	0	0	3	0	1	2	0	0	0	3	1	1	0	0	1	0	0	2	1	0	0	0	0	0	0	3	0	0	1	0	0	2	1	0	1	2	1	0	0	3	0	1
0	0	0	1	0	4	1	0	0	0	4	1	3	0	0	0	0	2	0	3	0	0	0	1	0	2	1	0	0	0	2	0	0	1	0	0	1	0	1	3	1	2	3	2	1	2	0	4	1	0
2	2	0	1	0	4	0	0	2	0	4	0	1	1	0	0	2	2	0	3	0	0	1	0	0	2	1	0	0	0	1	0	0	3	0	0	1	1	2	3	2	0	3	2	1	0	0	4	1	0
3	0	0	1	0	4	1	0	0	0	4	2	1	1	0	0	0	2	0	1	0	0	0	1	0	2	1	0	0	0	3	2	2	3	1	0	1	0	1	3	0	0	1	0	1	2	0	3	2	0
1	0	1	1	0	4	0	1	0	0	3	1	1	0	0	0	0	2	0	1	0	2	1	0	0	2	1	0	1	0	0	0	0	1	1	0	1	0	0	2	0	0	3	1	1	0	0	4	0	0
1	0	0	1	0	4	0	0	0	0	3	1	1	2	0	0	0	3	1	1	0	0	1	0	0	2	1	0	0	0	0	0	0	1	1	0	1	0	0	2	0	0	1	1	1	0	0	3	0	1
1	1	0	1	0	3	1	0	1	1	4	2	3	1	0	0	0	2	0	3	0	0	0	1	0	2	1	0	0	0	3	0	0	1	1	0	1	0	1	3	0	3	2	0	1	3	0	3	2	0
1	0	1	1	2	4	0	0	0	0	4	2	1	1	0	0	0	2	0	2	0	0	0	1	0	2	0	0	1	0	3	0	0	1	1	0	3	1	0	2	1	0	1	0	3	0	0	4	1	0
0	0	0	1	0	4	0	0	0	0	3	2	1	1	0	0	2	2	1	1	0	2	2	0	0	2	1	0	0	0	3	0	0	1	1	0	1	0	0	2	0	0	1	0	3	0	0	4	1	1
2	0	0	1	0	4	0	0	0	0	2	0	1	1	0	0	0	3	1	1	0	0	2	0	0	2	1	0	0	0	1	2	0	3	1	0	1	0	0	2	0	0	1	0	1	0	0	3	1	1
0	1	0	1	0	3	1	0	1	1	2	2	1	1	0	0	2	2	0	1	0	0	1	1	0	2	1	0	0	0	3	0	0	1	1	0	1	0	1	2	0	1	0	0	1	3	0	2	2	0
1	0	0	1	0	3	1	0	0	0	3	1	3	1	0	0	0	2	0	3	0	0	1	1	0	2	1	0	0	0	3	0	0	2	1	0	1	0	1	3	0	2	2	0	1	2	0	3	2	0
0	0	0	1	2	4	1	0	0	0	2	1	1	0	0	0	0	2	0	1	0	0	1	1	0	2	1	0	0	0	2	0	0	1	1	0	1	0	1	3	0	0	1	1	1	2	0	3	1	0
0	2	0	1	2	4	0	0	0	0	4	0	1	1	0	0	0	0	1	3	0	0	0	0	0	1	0	2	1	0	3	0	0	3	1	0	0	1	0	2	1	0	3	1	1	2	0	4	2	0
4	2	0	1	0	3	0	0	0	0	4	1	1	1	0	0	0	1	0	1	0	0	0	0	0	1	1	2	0	0	1	0	0	4	1	0	0	0	0	3	0	0	2	0	1	0	0	3	1	0
2	0	0	1	0	4	0	0	0	0	3	1	1	0	0	0	0	0	0	1	0	0	1	1	0	0	1	0	0	0	2	2	2	3	1	0	0	0	0	3	0	0	3	1	1	2	0	3	0	0
2	2	0	1	1	4	0	0	0	0	3	0	1	3	0	0	0	0	1	1	0	0	0	1	0	1	1	2	0	0	1	0	0	3	0	0	0	0	0	2	1	0	3	1	1	0	0	3	1	0
2	0	0	1	0	3	0	0	0	0	4	2	3	1	0	0	0	0	0	3	0	0	0	1	0	0	1	0	0	0	3	0	0	2	1	0	0	0	0	3	0	2	3	0	1	2	0	3	1	0
1	0	0	1	2	4	0	0	0	0	3	2	1	0	0	0	0	0	0	1	0	0	0	1	0	0	1	0	0	0	2	0	0	1	1	0	0	0	0	3	0	0	3	1	1	2	0	3	0	0
1	2	0	1	2	2	0	0	0	0	5	1	1	1	0	0	0	0	0	3	0	0	0	0	0	1	0	2	1	0	3	0	0	4	2	0	0	1	2	2	0	0	1	0	1	2	0	3	2	0
3	2	0	1	0	1	0	0	0	0	4	0	1	1	0	0	0	1	0	1	0	0	1	0	0	1	1	2	0	0	1	0	0	5	1	0	1	0	2	3	0	0	0	0	1	0	0	2	1	0
2	0	0	1	0	2	0	0	0	0	4	0	1	0	0	0	0	2	1	1	0	0	0	0	0	0	1	0	0	0	0	2	0	4	0	0	0	0	2	2	2	0	1	2	1	0	0	1	0	0
1	0	0	1	0	2	0	0	0	0	4	1	1	1	0	0	0	2	1	1	0	0	0	0	0	0	1	0	0	0	1	0	0	3	1	0	0	2	3	2	2	0	1	0	1	0	0	3	1	0
2	2	1	1	1	4	1	0	0	0	3	0	1	3	0	0	0	2	0	1	0	0	0	1	0	3	1	2	0	0	1	0	0	3	0	0	1	0	0	2	1	0	1	1	1	0	0	3	1	0
4	0	2	1	0	3	0	0	0	0	4	1	1	3	0	1	0	3	1	3	0	0	1	0	0	2	1	0	0	0	1	0	0	4	1	0	1	0	0	3	0	0	0	0	1	2	2	2	3	2
1	1	0	1	0	3	0	0	1	1	3	1	1	3	0	0	0	3	1	1	0	0	1	0	0	2	1	0	0	0	1	0	0	1	1	0	1	0	0	2	0	1	0	0	1	1	0	2	1	1
3	0	0	1	0	4	0	0	0	0	3	1	1	3	0	0	0	3	1	1	0	0	1	0	0	2	1	0	0	0	1	0	0	3	1	0	1	0	0	2	0	0	1	0	1	0	0	3	1	1
1	0	0	1	0	4	1	0	0	0	4	2	3	1	0	0	0	2	0	3	0	0	0	1	0	2	0	0	1	0	3	0	0	1	1	0	1	1	1	3	0	2	3	0	1	2	0	4	1	0
0	1	1	1	0	3	0	1	1	1	2	0	1	1	0	0	0	2	0	1	0	2	2	0	0	2	1	0	1	0	1	0	0	1	1	0	1	0	0	2	0	1	2	0	1	1	0	3	1	0
0	0	0	1	0	4	0	0	0	0	2	0	1	3	0	0	0	3	1	1	0	0	2	0	0	2	1	0	0	0	1	0	0	1	1	0	1	0	0	2	0	0	1	0	1	0	0	3	1	1
3	2	1	1	1	3	1	0	0	0	2	0	1	3	0	0	0	2	0	1	0	0	1	1	0	3	1	2	0	0	1	0	0	4	1	0	1	0	0	2	0	0	0	0	1	0	0	2	1	0
0	0	1	1	0	4	0	1	0	0	4	0	1	1	0	0	0	2	0	1	0	0	0	0	0	0	0	0	2	0	1	0	0	1	0	0	0	3	2	2	1	0	3	1	1	0	0	4	0	0
2	0	0	1	0	4	0	0	0	0	4	1	1	0	0	0	0	0	0	1	0	0	0	1	0	0	1	0	0	0	2	2	2	3	0	0	0	0	0	3	1	0	3	2	1	2	0	3	0	0
3	0	0	1	0	4	0	0	0	0	4	2	1	0	0	0	0	0	0	1	0	0	0	1	0	0	1	0	0	0	2	2	2	3	1	0	0	0	0	3	0	0	3	1	1	2	0	3	0	0
2	2	0	1	0	4	0	0	0	0	3	0	1	1	0	0	0	1	0	1	0	0	1	0	0	1	0	2	1	0	1	0	0	3	1	0	0	1	0	3	0	0	3	0	1	0	0	4	0	0
3	3	0	1	0	3	0	0	3	1	4	1	1	1	0	0	2	0	0	3	0	0	0	0	0	0	1	0	0	0	1	0	0	3	1	0	0	1	2	3	0	1	3	1	1	1	0	3	1	0
4	2	0	1	1	3	0	0	0	0	3	1	1	3	0	0	0	0	1	1	0	0	0	1	0	1	1	2	0	0	1	0	0	4	1	0	0	0	0	2	0	0	2	0	1	0	0	2	1	0
0	0	0	1	2	4	0	0	0	0	2	1	1	0	0	0	0	0	0	1	0	0	1	1	0	0	1	0	0	0	2	0	0	1	1	0	0	0	0	3	0	0	3	1	1	2	0	3	0	0
1	0	0	1	0	3	0	0	0	0	5	3	1	0	0	0	2	1	1	1	0	2	0	0	0	0	1	0	0	0	2	0	0	3	1	0	0	0	2	2	1	0	1	1	3	0	0	3	0	0
2	0	0	1	0	2	0	0	0	0	4	1	1	1	0	0	0	0	0	1	0	0	1	1	0	0	1	0	0	0	3	2	2	4	1	0	0	0	2	3	0	0	1	0	1	2	0	1	1	0
2	1	0	1	0	1	0	0	1	1	4	1	1	1	0	0	0	0	0	1	0	0	1	1	0	0	1	0	0	0	3	2	2	4	1	0	0	0	2	3	0	1	0	0	1	3	0	0	1	0
0	0	0	1	0	3	0	0	0	0	4	0	1	1	0	0	0	1	1	1	0	0	0	0	0	0	1	0	0	0	1	0	0	4	0	0	0	0	2	2	2	0	1	1	1	0	0	3	1	0
0	0	0	1	0	3	0	0	0	0	4	0	1	0	0	0	0	1	1	1	0	0	0	0	0	0	1	0	0	0	0	0	0	4	0	0	0	0	2	2	2	0	1	2	1	0	0	3	0	0
0	0	0	1	0	3	0	0	0	0	3	0	1	2	0	0	0	2	1	1	0	0	1	0	0	0	1	0	0	0	0	0	0	3	1	0	0	0	2	2	1	0	1	1	1	0	0	1	0	0
2	0	0	1	0	2	0	0	0	0	3	0	1	3	0	0	0	2	1	1	0	0	1	0	0	0	1	0	0	0	1	0	0	4	1	0	0	0	2	2	1	0	1	0	1	0	0	1	1	0
0	0	0	1	0	4	0	0	0	0	3	0	1	3	0	0	0	3	1	1	0	0	1	0	0	2	1	0	0	0	1	0	0	1	0	0	1	0	0	2	1	0	1	1	1	0	0	3	1	1
2	0	0	1	0	4	0	0	0	0	3	0	1	3	0	0	0	3	1	1	0	0	1	0	0	2	0	0	1	0	1	0	0	3	0	0	1	1	0	2	1	0	1	1	1	0	0	3	0	1
3	0	0	1	0	4	1	0	0	0	4	2	1	1	0	0	0	2	0	1	0	0	0	1	0	2	0	0	1	0	3	2	2	3	1	0	1	1	1	3	0	0	1	0	1	2	0	3	1	0
1	0	0	1	0	4	1	2	2	0	4	2	1	1	0	0	0	2	0	1	0	0	0	1	0	2	0	2	1	0	3	0	0	1	1	0	3	1	1	2	0	0	1	0	1	2	0	3	1	0
2	0	0	1	0	3	0	0	0	0	3	1	1	3	0	0	0	3	1	1	0	0	1	0	0	2	1	0	0	0	1	0	0	2	1	0	1	0	0	2	0	0	0	0	1	0	0	2	1	1
3	2	1	1	1	4	1	0	0	0	3	1	1	3	0	0	0	2	0	1	0	0	0	1	0	3	0	2	1	0	1	0	0	3	1	0	1	1	0	2	0	0	1	0	1	0	0	3	0	0
2	0	2	1	0	4	0	0	0	0	3	0	1	2	0	1	0	3	1	3	0	0	2	0	0	2	1	0	0	0	0	0	0	3	1	0	1	0	0	3	0	0	1	1	1	2	2	3	2	2
2	2	1	1	1	4	1	0	0	0	2	0	1	3	0	0	0	2	0	1	0	0	1	1	0	3	1	2	0	0	1	0	0	3	1	0	1	0	0	2	0	0	1	0	1	0	0	3	1	0
2	2	1	1	1	4	1	0	0	0	2	0	1	3	0	0	0	2	0	1	0	0	1	1	0	3	0	2	1	0	1	0	0	3	1	0	1	1	0	2	0	0	1	0	1	0	0	3	0	0
3	2	0	1	0	3	0	0	0	0	3	0	1	1	0	0	0	1	0	1	0	0	1	0	0	1	1	2	0	0	1	0	0	4	1	0	0	0	0	3	0	0	2	0	1	0	0	3	1	0
0	0	0	1	2	4	0	0	0	0	3	1	1	1	0	0	0	0	0	1	0	0	0	1	0	0	1	0	0	0	3	0	0	1	0	0	0	0	0	3	1	0	3	1	1	2	0	3	1	0
2	2	0	1	0	4	0	0	2	0	3	0	1	1	0	0	2	0	0	3	0	0	1	0	0	0	1	0	0	0	1	0	0	3	1	0	0	1	2	3	0	0	4	1	1	0	0	4	1	0
4	0	2	1	0	1	0	0	0	0	5	1	1	3	0	1	0	2	1	3	0	1	0	0	0	0	1	0	0	0	1	0	0	5	1	0	0	0	2	3	1	0	0	0	1	2	2	0	3	2
1	0	0	1	0	2	0	0	0	0	4	2	1	1	0	0	2	1	1	1	0	2	1	0	0	0	1	0	0	0	3	0	0	4	1	0	0	0	2	2	1	0	0	0	3	0	0	2	1	0
2	0	0	1	0	2	0	0	0	0	4	0	1	2	0	0	0	2	1	1	0	0	0	0	0	0	1	0	0	0	0	0	0	4	0	0	0	0	2	2	2	0	1	2	1	0	0	1	0	0
2	0	0	1	0	2	0	0	0	0	4	1	1	1	0	0	0	1	1	1	0	0	0	0	0	0	1	0	0	0	1	0	0	5	1	0	0	0	2	2	1	0	0	0	1	0	0	2	1	0
1	1	0	1	0	1	0	0	1	1	4	1	1	1	0	0	0	2	1	1	0	0	0	0	0	0	1	0	0	0	1	0	0	3	1	0	0	2	3	2	2	1	0	0	1	1	0	2	1	0
1	0	0	1	0	2	0	0	0	0	4	1	1	0	0	0	0	2	1	1	0	0	0	0	0	0	1	0	0	0	0	0	0	3	1	0	0	2	3	2	2	0	1	1	1	0	0	3	0	0
0	0	0	1	0	3	0	0	0	0	3	0	1	3	0	0	0	2	1	1	0	0	1	0	0	0	1	0	0	0	1	0	0	3	1	0	0	0	2	2	1	0	1	0	1	0	0	1	1	0
0	1	0	1	0	1	0	0	1	1	3	0	1	1	0	0	0	2	1	1	0	0	1	0	0	0	1	0	0	0	1	0	0	3	1	0	0	2	3	2	2	1	0	0	1	1	0	2	1	0
0	0	0	1	0	2	0	0	0	0	3	0	1	0	0	0	0	2	1	1	0	0	1	0	0	0	1	0	0	0	0	0	0	3	1	0	0	2	3	2	2	0	1	1	1	0	0	3	0	0
2	1	2	1	0	3	0	0	1	1	4	0	1	3	0	1	0	3	1	3	0	0	1	0	0	2	1	0	0	0	1	0	0	3	0	0	1	0	0	3	1	1	0	1	1	3	2	2	3	2
2	0	0	1	0	4	0	0	0	0	3	0	1	3	0	0	0	3	1	1	0	0	1	0	0	2	1	0	0	0	1	0	0	3	0	0	1	0	0	2	1	0	1	1	1	0	0	3	1	1
0	1	0	1	0	3	0	0	1	1	3	0	1	1	0	0	0	2	1	1	0	0	1	0	0	2	1	0	0	0	1	0	0	3	0	0	1	0	0	2	1	1	0	1	1	1	0	3	1	1
1	0	1	1	0	4	0	1	0	0	3	1	1	1	0	0	0	3	0	1	0	0	1	0	0	2	0	0	2	0	1	0	0	1	1	0	1	3	2	2	0	0	1	0	1	0	0	4	0	0
3	2	0	1	0	4	0	0	2	0	4	1	1	1	0	0	2	2	0	3	0	0	1	0	0	2	1	0	0	0	1	0	0	3	1	0	1	1	2	3	1	0	3	1	1	0	0	4	1	0
0	1	0	1	0	3	1	2	3	1	3	1	1	1	0	0	0	2	0	1	0	0	1	1	0	2	1	2	0	0	3	0	0	1	1	0	3	0	1	2	0	1	0	0	1	3	0	2	2	0
0	2	1	1	2	4	1	0	0	0	3	0	1	0	0	0	0	2	0	3	0	0	1	0	0	3	1	2	0	0	2	0	0	3	2	0	1	0	0	2	0	0	1	1	1	2	0	4	2	0
2	2	0	1	0	4	0	0	0	0	4	0	1	1	0	0	0	1	0	1	0	0	0	0	0	1	0	2	1	0	1	0	0	3	0	0	0	1	0	3	1	0	3	1	1	0	0	4	0	0
2	0	2	1	0	4	0	0	0	0	4	0	1	2	0	1	0	1	1	3	0	1	0	0	0	0	1	0	0	0	0	0	0	3	0	0	0	0	0	3	1	0	3	2	1	2	2	3	2	2
3	0	2	1	0	4	0	0	0	0	4	1	1	3	0	1	0	1	1	3	0	1	0	0	0	0	1	0	0	0	1	0	0	3	1	0	0	0	0	3	0	0	3	0	1	2	2	3	3	2
3	0	0	1	0	3	0	0	0	0	3	1	1	1	0	0	0	0	0	1	0	0	1	1	0	0	1	0	0	0	3	2	2	4	1	0	0	0	0	3	0	0	2	0	1	2	0	2	1	0
2	3	0	1	0	3	0	0	3	1	4	0	1	1	0	0	2	0	0	3	0	0	0	0	0	0	1	0	0	0	1	0	0	3	0	0	0	1	2	3	1	1	3	2	1	1	0	3	1	0
0	0	0	1	0	4	0	0	0	0	3	1	3	1	0	0	0	0	0	3	0	0	1	1	0	0	0	0	1	0	3	0	0	1	1	0	0	1	0	3	0	2	4	0	1	2	0	4	0	0
0	0	0	1	0	4	0	0	0	0	3	1	3	0	0	0	0	0	0	3	0	0	1	1	0	0	1	0	0	0	2	0	0	1	1	0	0	0	0	3	0	2	4	1	1	2	0	4	0	0
3	2	0	1	1	3	0	0	0	0	2	0	1	3	0	0	0	0	1	1	0	0	1	1	0	1	1	2	0	0	1	0	0	4	1	0	0	0	0	2	0	0	2	0	1	0	0	2	1	0
3	2	0	1	0	2	0	0	0	0	5	1	1	1	0	0	0	1	0	1	0	0	0	0	0	1	0	2	1	0	1	0	0	4	1	0	1	1	2	3	0	0	1	0	1	0	0	3	0	0
2	0	0	1	0	2	0	0	0	0	5	3	1	1	0	0	2	1	1	1	0	2	0	0	0	0	1	0	0	0	3	0	0	4	1	0	0	0	2	2	1	0	0	0	3	0	0	2	1	0
0	1	0	1	0	2	0	0	1	1	4	2	1	1	0	0	2	1	1	1	0	2	1	0	0	0	1	0	0	0	3	0	0	3	1	0	0	0	2	2	1	1	0	0	3	1	0	2	1	0
0	0	0	1	0	3	0	0	0	0	4	0	1	3	0	0	0	2	1	1	0	0	0	0	0	0	0	0	1	0	1	0	0	3	0	0	0	1	2	2	2	0	1	1	1	0	0	1	0	0
1	0	0	1	0	2	0	0	0	0	4	1	1	1	0	0	0	2	1	1	0	0	0	0	0	0	0	0	1	0	1	0	0	3	1	0	0	3	3	2	2	0	1	0	1	0	0	3	0	0
0	0	0	1	0	2	0	0	0	0	3	0	1	1	0	0	0	2	1	1	0	0	1	0	0	0	0	0	1	0	1	0	0	3	1	0	0	3	3	2	2	0	1	0	1	0	0	3	0	0
1	0	0	1	0	3	0	0	0	0	3	0	1	3	0	0	0	3	1	1	0	0	1	0	0	2	1	0	0	0	1	0	0	2	0	0	1	0	0	2	1	0	0	1	1	0	0	2	1	1
2	0	0	1	0	4	1	0	0	0	4	1	1	1	0	0	0	2	0	1	0	0	0	1	0	2	1	0	0	0	3	2	2	3	0	0	1	0	1	3	1	0	1	1	1	2	0	3	2	0
3	0	0	1	0	3	1	0	0	0	4	1	1	1	0	0	0	2	0	1	0	0	0	1	0	2	1	0	0	0	3	2	2	4	0	0	1	0	1	3	1	0	0	1	1	2	0	2	2	0
2	0	0	1	0	3	1	2	2	0	4	2	1	1	0	0	0	2	0	1	0	0	0	1	0	2	1	2	0	0	3	0	0	2	1	0	3	0	1	2	0	0	0	0	1	2	0	2	2	0
1	1	0	1	2	3	1	0	1	1	3	2	1	1	0	0	0	2	0	1	0	0	0	1	0	2	1	0	0	0	3	0	0	1	1	0	1	0	1	3	0	1	0	0	1	3	0	2	2	0
2	0	1	1	2	3	0	0	0	0	4	2	1	1	0	0	0	2	0	2	0	0	0	1	0	2	1	0	0	0	3	0	0	2	1	0	3	0	0	2	1	0	0	0	3	0	0	3	2	0
0	1	0	1	0	3	1	0	1	1	3	1	3	1	0	0	0	2	0	3	0	0	1	1	0	2	1	0	0	0	3	0	0	1	1	0	1	0	1	3	0	3	2	0	1	3	0	3	2	0
3	2	0	1	0	3	0	0	2	0	3	0	1	1	0	0	2	2	0	3	0	0	2	0	0	2	1	0	0	0	1	0	0	4	1	0	1	1	2	3	1	0	2	1	1	0	0	3	1	0
2	2	0	1	0	4	0	0	2	0	3	0	1	0	0	0	2	2	0	3	0	0	2	0	0	2	1	0	0	0	0	0	0	3	1	0	1	1	2	3	1	0	3	2	1	0	0	4	0	0
3	2	0	1	0	4	0	0	0	0	4	1	1	1	0	0	0	1	0	1	0	0	0	0	0	1	1	2	0	0	1	0	0	3	1	0	0	0	0	3	0	0	3	0	1	0	0	4	1	0
1	0	0	1	0	4	0	0	0	0	4	3	1	1	0	0	2	0	1	2	0	2	0	0	0	0	0	0	1	0	3	0	0	1	1	0	0	1	0	2	0	0	3	0	3	0	0	4	0	0
4	0	2	1	0	3	0	0	0	0	4	1	1	3	0	1	0	1	1	3	0	1	0	0	0	0	1	0	0	0	1	0	0	4	1	0	0	0	0	3	0	0	2	0	1	2	2	2	3	2
2	3	0	1	0	3	0	0	1	1	3	0	1	1	0	0	0	1	0	1	0	0	1	0	0	1	1	2	0	0	1	0	0	3	1	0	0	0	0	3	0	1	2	0	1	1	0	3	1	0
2	0	0	1	0	4	0	0	0	0	3	1	1	1	0	0	0	0	0	1	0	0	1	1	0	0	0	0	1	0	3	2	2	3	1	0	0	1	0	3	0	0	3	0	1	2	0	3	0	0
2	2	0	1	1	4	0	0	0	0	3	0	1	3	0	0	0	0	1	1	0	0	0	1	0	1	0	2	1	0	1	0	0	3	0	0	0	1	0	2	1	0	3	1	1	0	0	3	0	0
0	0	2	1	2	4	0	0	0	0	2	1	1	1	0	0	0	0	0	1	0	0	1	1	0	0	1	0	0	0	3	0	0	1	1	0	0	0	0	2	0	0	3	0	1	2	0	3	1	0
0	0	0	1	2	4	0	0	0	0	2	1	1	1	0	0	0	0	0	1	0	0	1	1	0	0	1	0	0	0	3	0	0	1	1	0	0	0	0	3	0	0	3	0	1	2	0	3	1	0
2	2	0	1	1	4	0	0	0	0	2	0	1	3	0	0	0	0	1	1	0	0	1	1	0	1	1	2	0	0	1	0	0	3	1	0	0	0	0	2	0	0	3	0	1	0	0	3	1	0
1	0	1	1	0	1	0	1	0	0	4	0	1	1	0	0	0	2	0	1	0	0	0	0	0	0	1	0	1	0	1	0	0	4	0	0	0	2	3	2	1	0	0	1	1	0	0	2	1	0
0	0	1	1	0	2	0	1	0	0	3	0	1	0	0	0	0	2	0	1	0	0	1	0	0	0	1	0	1	0	0	0	0	3	1	0	0	2	3	2	0	0	1	1	1	0	0	3	0	0
0	0	0	1	0	3	0	0	0	0	4	2	1	1	0	0	2	1	1	1	0	2	1	0	0	0	0	0	1	0	3	0	0	3	1	0	0	1	2	2	1	0	1	0	3	0	0	3	0	0
0	0	0	1	0	3	0	0	0	0	4	2	1	0	0	0	2	1	1	1	0	2	1	0	0	0	1	0	0	0	2	0	0	3	1	0	0	0	2	2	1	0	1	1	3	0	0	3	0	0
2	0	0	1	0	2	0	0	0	0	4	0	1	3	0	0	0	2	1	1	0	0	0	0	0	0	1	0	0	0	1	0	0	4	0	0	0	0	2	2	2	0	1	1	1	0	0	1	1	0
0	0	0	1	0	2	0	0	0	0	4	0	1	1	0	0	0	2	1	1	0	0	0	0	0	0	1	0	0	0	1	0	0	3	0	0	0	2	3	2	3	0	1	1	1	0	0	3	1	0
2	0	2	1	0	4	0	0	0	0	4	0	1	3	0	1	0	3	1	3	0	0	1	0	0	2	0	0	1	0	1	0	0	3	0	0	1	1	0	3	1	0	1	1	1	2	2	3	2	2
1	0	0	1	0	3	0	0	0	0	3	0	1	1	0	0	0	2	1	1	0	0	1	0	0	2	1	0	0	0	1	0	0	4	0	0	1	0	0	2	1	0	0	1	1	0	0	3	1	1
0	0	0	1	2	4	1	0	0	0	3	1	1	0	0	0	0	2	0	1	0	0	0	1	0	2	1	0	0	0	2	0	0	1	0	0	1	0	1	3	1	0	1	2	1	2	0	3	1	0
1	2	1	1	2	4	1	0	0	0	4	1	1	1	0	0	0	2	0	3	0	0	0	0	0	3	0	2	1	0	3	0	0	3	2	0	1	1	0	2	0	0	1	0	1	2	0	4	2	0
4	2	0	1	0	3	0	0	2	0	4	1	1	1	0	0	2	2	0	3	0	0	1	0	0	2	1	0	0	0	1	0	0	4	1	0	1	1	2	3	1	0	2	1	1	0	0	3	1	0
3	2	1	1	1	4	1	0	0	0	3	1	1	2	0	0	0	2	0	1	0	0	0	1	0	3	1	2	0	0	0	0	0	3	1	0	1	0	0	2	0	0	1	1	1	0	0	3	0	0
2	2	0	1	0	4	0	0	0	0	4	0	1	1	0	0	0	1	0	1	0	0	0	0	0	1	1	2	0	0	1	0	0	3	0	0	0	0	0	3	1	0	3	1	1	0	0	4	1	0
3	2	0	1	0	3	0	0	0	0	4	0	1	1	0	0	0	1	0	1	0	0	0	0	0	1	1	2	0	0	1	0	0	4	0	0	0	0	0	3	1	0	2	1	1	0	0	3	1	0
2	1	0	1	0	3	0	0	1	1	4	1	1	1	0	0	0	0	0	1	0	0	0	1	0	0	1	0	0	0	3	2	2	3	0	0	0	0	0	3	1	1	2	1	1	3	0	2	1	0
0	0	0	1	0	4	0	0	0	0	4	2	1	1	0	0	2	0	1	2	0	2	0	0	0	0	1	0	0	0	3	0	0	1	0	0	0	0	0	2	1	0	3	1	3	0	0	4	1	0
1	3	0	1	2	3	0	0	1	1	4	1	1	1	0	0	0	0	1	3	0	0	0	0	0	1	1	2	0	0	3	0	0	3	2	0	0	0	0	2	0	1	2	0	1	3	0	3	3	0
0	1	2	1	2	3	0	0	1	1	3	1	1	1	0	0	0	0	0	1	0	0	0	1	0	0	1	0	0	0	3	0	0	1	0	0	0	0	0	2	1	1	2	1	1	3	0	2	1	0
0	0	0	1	2	4	0	0	0	0	3	1	1	1	0	0	0	0	0	1	0	0	0	1	0	0	0	0	1	0	3	0	0	1	0	0	0	1	0	3	1	0	3	1	1	2	0	3	0	0
1	0	0	1	0	4	0	0	0	0	4	2	3	1	0	0	0	0	0	3	0	0	0	1	0	0	1	0	0	0	3	0	0	1	1	0	0	0	0	3	0	2	4	0	1	2	0	4	1	0
1	0	0	1	2	4	0	0	0	0	3	2	1	1	0	0	0	0	0	1	0	0	0	1	0	0	1	0	0	0	3	0	0	1	1	0	0	0	0	3	0	0	3	0	1	2	0	3	1	0
0	1	0	1	0	3	0	0	1	1	3	1	3	1	0	0	0	0	0	3	0	0	1	1	0	0	1	0	0	0	3	0	0	1	1	0	0	0	0	3	0	3	3	0	1	3	0	3	1	0
2	3	0	1	0	3	0	0	3	1	3	0	1	1	0	0	2	0	0	3	0	0	1	0	0	0	1	0	0	0	1	0	0	3	1	0	0	1	2	3	0	1	3	1	1	1	0	3	1	0
1	2	0	1	2	1	0	0	0	0	5	0	1	1	0	0	0	0	0	3	0	0	0	0	0	1	1	2	0	0	3	0	0	5	1	0	0	0	2	2	1	0	0	1	1	2	0	2	3	0
3	0	0	1	0	1	0	0	0	0	4	1	1	1	0	0	0	0	0	1	0	0	1	1	0	0	1	0	0	0	3	2	2	5	1	0	0	0	2	3	0	0	0	0	1	2	0	0	1	0
0	0	0	1	0	3	0	0	0	0	4	0	1	1	0	0	0	1	1	1	0	0	0	0	0	0	0	0	1	0	1	0	0	4	0	0	0	1	2	2	2	0	1	1	1	0	0	3	0	0
4	0	0	1	0	1	0	0	0	0	4	1	1	3	0	0	0	2	1	1	0	0	0	0	0	0	1	0	0	0	1	0	0	5	1	0	0	0	2	2	1	0	0	0	1	0	0	0	1	0
0	2	1	1	2	4	1	0	0	0	4	0	1	1	0	0	0	2	0	3	0	0	0	0	0	3	0	2	1	0	3	0	0	3	1	0	1	1	0	2	1	0	1	1	1	2	0	4	2	0
0	2	1	1	2	4	1	0	0	0	4	0	1	0	0	0	0	2	0	3	0	0	0	0	0	3	1	2	0	0	2	0	0	3	1	0	1	0	0	2	1	0	1	2	1	2	0	4	2	0
0	0	1	1	0	4	0	1	0	0	3	0	1	1	0	0	0	3	0	1	0	0	1	0	0	2	1	0	1	0	1	0	0	1	0	0	1	2	2	2	1	0	1	1	1	0	0	4	1	0
0	1	1	1	0	3	0	1	1	1	3	0	1	1	0	0	0	2	0	1	0	2	1	0	0	2	1	0	1	0	1	0	0	1	0	0	1	0	0	2	1	1	2	1	1	1	0	3	1	0
0	0	0	1	0	4	1	2	2	0	4	1	1	0	0	0	0	2	0	1	0	0	0	1	0	2	1	2	0	0	2	0	0	1	0	0	3	0	1	2	1	0	1	2	1	2	0	3	1	0
3	0	2	1	0	4	0	0	0	0	4	1	1	3	0	1	0	3	1	3	0	0	1	0	0	2	1	0	0	0	1	0	0	3	1	0	1	0	0	3	0	0	1	0	1	2	2	3	3	2
1	0	1	1	2	4	0	0	0	0	4	2	1	0	0	0	0	2	0	2	0	0	0	1	0	2	1	0	0	0	2	0	0	1	1	0	3	0	0	2	1	0	1	1	3	0	0	4	1	0
0	0	1	1	0	4	0	1	0	0	2	0	1	0	0	0	0	3	0	1	0	0	2	0	0	2	1	0	1	0	0	0	0	1	1	0	1	2	2	2	0	0	1	1	1	0	0	4	0	0
1	0	0	1	0	3	0	0	0	0	2	0	1	1	0	0	0	2	1	1	0	0	2	0	0	2	1	0	0	0	1	0	0	4	1	0	1	0	0	2	0	0	0	0	1	0	0	3	1	1
0	0	0	1	2	4	1	0	0	0	2	1	1	1	0	0	0	2	0	1	0	0	1	1	0	2	0	0	1	0	3	0	0	1	1	0	1	1	1	3	0	0	1	0	1	2	0	3	1	0
0	0	1	1	0	4	0	1	0	0	3	0	1	0	0	0	0	2	0	1	0	0	1	0	0	0	1	0	1	0	0	0	0	1	1	0	0	2	2	2	0	0	3	1	1	0	0	4	0	0
0	0	0	1	0	4	0	0	0	0	4	1	3	1	0	0	0	0	0	3	0	0	0	1	0	0	1	0	0	0	3	0	0	1	0	0	0	0	0	3	1	2	4	1	1	2	0	4	1	0
1	0	0	1	0	3	0	0	0	0	4	1	3	1	0	0	0	0	0	3	0	0	0	1	0	0	1	0	0	0	3	0	0	2	0	0	0	0	0	3	1	2	3	1	1	2	0	3	1	0
3	2	0	1	1	4	0	0	0	0	3	1	1	3	0	0	0	0	1	1	0	0	0	1	0	1	1	2	0	0	1	0	0	3	1	0	0	0	0	2	0	0	3	0	1	0	0	3	1	0
1	0	1	1	0	2	0	1	0	0	4	1	1	0	0	0	0	2	0	1	0	0	0	0	0	0	1	0	1	0	0	0	0	3	1	0	0	2	3	2	0	0	1	1	1	0	0	3	0	0
1	0	0	1	0	1	0	0	0	0	4	0	1	1	0	0	0	2	1	1	0	0	0	0	0	0	1	0	0	0	1	0	0	4	0	0	0	2	3	2	3	0	0	1	1	0	0	2	1	0
4	0	0	1	0	1	0	0	0	0	4	1	1	1	0	0	0	2	1	1	0	0	0	0	0	0	1	0	0	0	1	2	0	5	1	0	0	0	2	2	1	0	0	0	1	0	0	0	1	0
0	3	1	1	2	3	1	0	1	1	4	0	1	1	0	0	0	2	0	3	0	0	0	0	0	3	1	2	0	0	3	0	0	3	1	0	1	0	0	2	1	1	0	1	1	3	0	3	3	0
0	0	0	1	0	4	0	0	0	0	4	2	1	1	0	0	2	2	1	1	0	2	1	0	0	2	0	0	1	0	3	0	0	1	0	0	1	1	0	2	1	0	1	1	3	0	0	4	0	1
2	0	1	1	0	3	0	1	0	0	3	1	1	1	0	0	0	2	0	1	0	2	1	0	0	2	1	0	1	0	1	0	0	2	1	0	1	0	0	2	0	0	2	0	1	0	0	3	1	0
1	0	1	1	0	4	0	1	0	0	3	1	1	1	0	0	0	2	0	1	0	2	1	0	0	2	0	0	2	0	1	0	0	1	1	0	1	1	0	2	0	0	3	0	1	0	0	4	0	0
1	2	1	1	2	4	1	0	0	0	4	1	1	1	0	0	0	2	0	3	0	0	0	0	0	3	1	2	0	0	3	0	0	3	2	0	1	0	0	2	0	0	1	0	1	2	0	4	3	0
1	0	0	1	0	4	0	0	0	0	3	1	1	1	0	0	0	2	1	1	0	0	1	0	0	2	1	0	0	0	1	0	0	3	1	0	1	0	0	2	0	0	1	0	1	0	0	4	1	1
1	1	0	1	0	3	0	0	1	1	3	1	1	1	0	0	0	2	1	1	0	0	1	0	0	2	1	0	0	0	1	0	0	3	1	0	1	0	0	2	0	1	0	0	1	1	0	3	1	1
2	0	0	1	0	3	1	0	0	0	4	2	3	1	0	0	0	2	0	3	0	0	0	1	0	2	1	0	0	0	3	0	0	2	1	0	1	0	1	3	0	2	2	0	1	2	0	3	2	0
0	0	1	1	0	4	0	1	0	0	2	0	1	1	0	0	0	3	0	1	0	0	2	0	0	2	1	0	1	0	1	0	0	1	1	0	1	2	2	2	0	0	1	0	1	0	0	4	1	0
0	0	1	1	0	4	0	1	0	0	2	0	1	1	0	0	0	3	0	1	0	0	2	0	0	2	0	0	2	0	1	0	0	1	1	0	1	3	2	2	0	0	1	0	1	0	0	4	0	0
2	1	0	1	0	3	1	0	1	1	3	1	1	1	0	0	0	2	0	1	0	0	1	1	0	2	1	0	0	0	3	2	2	3	1	0	1	0	1	3	0	1	0	0	1	3	0	2	2	0
1	0	1	1	0	3	0	1	0	0	2	0	1	1	0	0	0	2	0	1	0	2	2	0	0	2	1	0	1	0	1	0	0	2	1	0	1	0	0	2	0	0	2	0	1	0	0	3	1	0
1	2	1	1	2	3	1	0	0	0	3	0	1	1	0	0	0	2	0	3	0	0	1	0	0	3	1	2	0	0	3	0	0	4	2	0	1	0	0	2	0	0	0	0	1	2	0	3	3	0
0	0	0	1	0	4	0	0	0	0	4	2	1	0	0	0	2	0	1	2	0	2	0	0	0	0	1	0	0	0	2	0	0	1	0	0	0	0	0	2	1	0	3	2	3	0	0	4	0	0
1	2	0	1	2	4	0	0	0	0	4	1	1	0	0	0	0	0	1	3	0	0	0	0	0	1	1	2	0	0	2	0	0	3	2	0	0	0	0	2	0	0	3	1	1	2	0	4	2	0
2	1	0	1	0	3	0	0	1	1	3	1	1	1	0	0	0	0	0	1	0	0	1	1	0	0	1	0	0	0	3	2	2	3	1	0	0	0	0	3	0	1	2	0	1	3	0	2	1	0
1	0	0	1	0	3	0	0	0	0	3	2	1	1	0	0	2	0	1	2	0	2	1	0	0	0	1	0	0	0	3	0	0	2	1	0	0	0	0	2	0	0	2	0	3	0	0	3	1	0
0	3	0	1	2	3	0	0	1	1	3	0	1	1	0	0	0	0	1	3	0	0	1	0	0	1	1	2	0	0	3	0	0	3	2	0	0	0	0	2	0	1	2	0	1	3	0	3	3	0
0	2	0	1	2	4	0	0	0	0	3	0	1	0	0	0	0	0	1	3	0	0	1	0	0	1	1	2	0	0	2	0	0	3	2	0	0	0	0	2	0	0	3	1	1	2	0	4	2	0
2	1	0	1	0	1	0	0	1	1	5	1	1	1	0	0	0	0	0	1	0	0	0	1	0	0	1	0	0	0	3	2	2	4	0	0	0	0	2	3	1	1	0	1	1	3	0	0	1	0
0	3	0	1	2	1	0	0	1	1	5	0	1	1	0	0	0	0	0	3	0	0	0	0	0	1	1	2	0	0	3	0	0	4	1	0	0	0	2	2	1	1	0	1	1	3	0	2	3	0
2	0	2	1	0	2	0	0	0	0	5	0	1	2	0	1	0	2	1	3	0	1	0	0	0	0	1	0	0	0	0	0	0	4	0	0	0	0	2	3	2	0	1	2	1	2	2	1	2	2
3	2	0	1	0	2	0	0	0	0	5	1	1	1	0	0	0	1	0	1	0	0	0	0	0	1	1	2	0	0	1	0	0	4	1	0	1	0	2	3	0	0	1	0	1	0	0	3	1	0
4	2	0	1	0	1	0	0	0	0	5	1	1	1	0	0	0	1	0	1	0	0	0	0	0	1	1	2	0	0	1	0	0	5	1	0	1	0	2	3	0	0	0	0	1	0	0	2	1	0
1	0	0	1	0	2	0	0	0	0	4	0	1	1	0	0	0	1	1	1	0	0	0	0	0	0	1	0	0	0	1	0	0	5	0	0	0	0	2	2	2	0	0	1	1	0	0	2	1	0
0	0	0	1	0	2	0	0	0	0	4	0	1	1	0	0	0	2	1	1	0	0	0	0	0	0	0	0	1	0	1	0	0	3	0	0	0	3	3	2	3	0	1	1	1	0	0	3	0	0
3	0	0	1	0	2	0	0	0	0	4	1	1	1	0	0	0	2	1	1	0	0	0	0	0	0	0	0	1	0	1	2	0	4	1	0	0	1	2	2	1	0	1	0	1	0	0	1	0	0
1	0	0	1	0	2	0	0	0	0	3	0	1	3	0	0	0	2	1	1	0	0	1	0	0	0	1	0	0	0	1	0	0	4	1	0	0	0	2	2	1	0	0	0	1	0	0	0	1	0
0	1	0	1	0	2	0	0	1	1	3	0	1	3	0	0	0	2	1	1	0	0	1	0	0	0	1	0	0	0	1	0	0	3	1	0	0	0	2	2	1	1	0	0	1	1	0	0	1	0
0	0	0	1	0	4	0	0	0	0	3	0	1	1	0	0	0	2	1	1	0	0	1	0	0	2	1	0	0	0	1	0	0	3	0	0	1	0	0	2	1	0	1	1	1	0	0	4	1	1
1	0	0	1	0	3	0	0	0	0	4	2	1	1	0	0	2	2	1	1	0	2	1	0	0	2	1	0	0	0	3	0	0	2	0	0	1	0	0	2	1	0	0	1	3	0	0	3	1	1
2	0	0	1	0	3	0	0	0	0	3	1	1	1	0	0	0	2	1	1	0	0	1	0	0	2	1	0	0	0	1	0	0	4	1	0	1	0	0	2	0	0	0	0	1	0	0	3	1	1
0	3	1	1	2	3	1	0	1	1	3	0	1	1	0	0	0	2	0	3	0	0	1	0	0	3	1	2	0	0	3	0	0	3	2	0	1	0	0	2	0	1	0	0	1	3	0	3	3	0
3	0	2	1	0	4	0	0	0	0	4	1	1	3	0	1	0	1	1	3	0	1	0	0	0	0	0	0	1	0	1	0	0	3	1	0	0	1	0	3	0	0	3	0	1	2	2	3	2	2
1	2	0	1	2	3	0	0	0	0	3	0	1	1	0	0	0	0	1	3	0	0	1	0	0	1	1	2	0	0	3	0	0	4	2	0	0	0	0	2	0	0	2	0	1	2	0	3	3	0
3	2	0	1	0	3	0	0	2	0	3	0	1	1	0	0	2	0	0	3	0	0	1	0	0	0	1	0	0	0	1	0	0	4	1	0	0	1	2	3	0	0	3	1	1	0	0	3	1	0
1	0	0	1	2	3	0	0	0	0	2	1	1	1	0	0	0	0	0	1	0	0	1	1	0	0	1	0	0	0	3	0	0	2	1	0	0	0	0	3	0	0	2	0	1	2	0	2	1	0
2	2	0	1	1	4	0	0	0	0	2	0	1	3	0	0	0	0	1	1	0	0	1	1	0	1	0	2	1	0	1	0	0	3	1	0	0	1	0	2	0	0	3	0	1	0	0	3	0	0
2	0	0	1	0	2	0	0	0	0	4	1	1	1	0	0	0	0	0	1	0	0	1	1	0	0	0	0	1	0	3	2	2	4	1	0	0	1	2	3	0	0	1	0	1	2	0	1	0	0
0	2	0	1	2	2	0	0	0	0	4	0	1	1	0	0	0	0	0	3	0	0	1	0	0	1	1	2	0	0	3	0	0	4	2	0	0	0	2	2	0	0	1	0	1	2	0	3	3	0
2	1	0	1	0	1	0	0	1	1	4	0	1	1	0	0	0	2	1	1	0	0	0	0	0	0	1	0	0	0	1	2	0	4	0	0	0	0	2	2	2	1	0	1	1	1	0	0	1	0
3	0	0	1	0	2	0	0	0	0	4	1	1	0	0	0	0	2	1	1	0	0	0	0	0	0	1	0	0	0	0	2	0	4	1	0	0	0	2	2	1	0	1	1	1	0	0	1	0	0
1	0	0	1	0	3	0	0	0	0	4	1	1	2	0	0	0	2	1	1	0	0	0	0	0	0	1	0	0	0	0	0	0	3	1	0	0	0	2	2	1	0	1	1	1	0	0	1	0	0
3	0	0	1	0	1	0	0	0	0	3	0	1	3	0	0	0	2	1	1	0	0	1	0	0	0	1	0	0	0	1	0	0	5	1	0	0	0	2	2	1	0	0	0	1	0	0	0	1	0
2	1	0	1	0	3	1	0	1	1	4	1	1	1	0	0	0	2	0	1	0	0	0	1	0	2	1	0	0	0	3	2	2	3	0	0	1	0	1	3	1	1	0	1	1	3	0	2	2	0
2	2	0	1	0	4	0	0	2	0	4	0	1	1	0	0	2	2	0	3	0	0	1	0	0	2	0	0	1	0	1	0	0	3	0	0	1	2	2	3	2	0	3	2	1	0	0	4	0	0
1	0	1	1	2	3	0	0	0	0	4	1	1	1	0	0	0	2	0	2	0	0	0	1	0	2	1	0	0	0	3	0	0	2	0	0	3	0	0	2	2	0	0	1	3	0	0	3	2	0
1	0	0	1	0	4	1	2	2	0	4	2	1	1	0	0	0	2	0	1	0	0	0	1	0	2	1	2	0	0	3	0	0	1	1	0	3	0	1	2	0	0	1	0	1	2	0	3	2	0
3	0	2	1	0	4	0	0	0	0	4	1	1	3	0	1	0	3	1	3	0	0	1	0	0	2	0	0	1	0	1	0	0	3	1	0	1	1	0	3	0	0	1	0	1	2	2	3	2	2
1	0	0	1	0	4	1	0	0	0	4	2	3	0	0	0	0	2	0	3	0	0	0	1	0	2	1	0	0	0	2	0	0	1	1	0	1	0	1	3	0	2	3	1	1	2	0	4	1	0
0	1	1	1	0	3	0	1	1	1	2	0	1	1	0	0	0	3	0	1	0	0	2	0	0	2	1	0	1	0	1	0	0	1	1	0	1	2	2	2	0	1	0	0	1	1	0	3	1	0
2	0	0	1	0	4	0	0	0	0	2	0	1	2	0	0	0	3	1	1	0	0	2	0	0	2	1	0	0	0	0	0	0	3	1	0	1	0	0	2	0	0	1	1	1	0	0	3	0	1
2	3	0	1	0	3	0	0	1	1	4	0	1	1	0	0	0	1	0	1	0	0	0	0	0	1	1	2	0	0	1	0	0	3	0	0	0	0	0	3	1	1	2	1	1	1	0	3	1	0
0	1	0	1	0	3	0	0	1	1	4	2	1	1	0	0	2	0	1	2	0	2	0	0	0	0	1	0	0	0	3	0	0	1	0	0	0	0	0	2	1	1	2	1	3	1	0	3	1	0
0	0	0	1	0	4	0	0	0	0	4	1	3	0	0	0	0	0	0	3	0	0	0	1	0	0	1	0	0	0	2	0	0	1	0	0	0	0	0	3	1	2	4	2	1	2	0	4	0	0
0	1	0	1	2	3	0	0	1	1	2	1	1	1	0	0	0	0	0	1	0	0	1	1	0	0	1	0	0	0	3	0	0	1	1	0	0	0	0	3	0	1	2	0	1	3	0	2	1	0
2	0	0	1	0	2	0	0	0	0	5	1	1	1	0	0	0	0	0	1	0	0	0	1	0	0	0	0	1	0	3	2	2	4	0	0	0	1	2	3	1	0	1	1	1	2	0	1	0	0
1	2	0	1	2	2	0	0	0	0	5	1	1	0	0	0	0	0	0	3	0	0	0	0	0	1	1	2	0	0	2	0	0	4	2	0	0	0	2	2	0	0	1	1	1	2	0	3	2	0
1	0	0	1	0	3	0	0	0	0	4	1	1	1	0	0	0	1	1	1	0	0	0	0	0	0	0	0	1	0	1	0	0	4	1	0	0	1	2	2	1	0	1	0	1	0	0	3	0	0
2	0	0	1	0	2	0	0	0	0	3	0	1	3	0	0	0	2	1	1	0	0	1	0	0	0	0	0	1	0	1	0	0	4	1	0	0	1	2	2	1	0	1	0	1	0	0	1	0	0
2	0	0	1	0	4	0	0	0	0	3	0	1	1	0	0	0	3	1	1	0	0	1	0	0	2	1	0	0	0	1	2	0	3	0	0	1	0	0	2	1	0	1	1	1	0	0	3	1	1
0	0	0	1	0	4	0	0	0	0	3	0	1	0	0	0	0	2	1	1	0	0	1	0	0	2	1	0	0	0	0	0	0	3	0	0	1	0	0	2	1	0	1	2	1	0	0	4	0	1
1	0	1	1	0	3	0	1	0	0	3	0	1	1	0	0	0	3	0	1	0	0	1	0	0	2	1	0	1	0	1	0	0	2	0	0	1	2	2	2	1	0	0	1	1	0	0	3	1	0
0	1	0	1	0	3	1	2	3	1	4	1	1	1	0	0	0	2	0	1	0	0	0	1	0	2	1	2	0	0	3	0	0	1	0	0	3	0	1	2	1	1	0	1	1	3	0	2	2	0
0	0	0	1	0	4	1	0	0	0	4	1	3	1	0	0	0	2	0	3	0	0	0	1	0	2	1	0	0	0	3	0	0	1	0	0	1	0	1	3	1	2	3	1	1	2	0	4	2	0
1	0	1	1	0	4	0	1	0	0	3	1	1	0	0	0	0	3	0	1	0	0	1	0	0	2	1	0	1	0	0	0	0	1	1	0	1	2	2	2	0	0	1	1	1	0	0	4	0	0
2	0	0	1	0	4	0	0	0	0	2	0	1	3	0	0	0	3	1	1	0	0	2	0	0	2	1	0	0	0	1	0	0	3	1	0	1	0	0	2	0	0	1	0	1	0	0	3	1	1
0	1	1	1	2	3	0	0	1	1	3	1	1	1	0	0	0	2	0	2	0	0	1	1	0	2	1	0	0	0	3	0	0	1	1	0	3	0	0	2	1	1	0	0	3	1	0	3	2	0
3	3	0	1	0	3	0	0	1	1	4	1	1	1	0	0	0	1	0	1	0	0	0	0	0	1	1	2	0	0	1	0	0	3	1	0	0	0	0	3	0	1	2	0	1	1	0	3	1	0
2	1	2	1	0	3	0	0	1	1	3	0	1	3	0	1	0	1	1	3	0	1	1	0	0	0	1	0	0	0	1	0	0	3	1	0	0	0	0	3	0	1	2	0	1	3	2	2	3	2
3	0	2	1	0	1	0	0	0	0	5	0	1	3	0	1	0	2	1	3	0	1	0	0	0	0	1	0	0	0	1	0	0	5	0	0	0	0	2	3	2	0	0	1	1	2	2	0	3	2
1	0	0	1	0	3	0	0	0	0	5	3	1	1	0	0	2	1	1	1	0	2	0	0	0	0	0	0	1	0	3	0	0	3	1	0	0	1	2	2	1	0	1	0	3	0	0	3	0	0
0	0	0	1	0	3	0	0	0	0	4	2	1	1	0	0	2	1	1	1	0	2	1	0	0	0	1	0	0	0	3	0	0	3	1	0	0	0	2	2	1	0	1	0	3	0	0	3	1	0
3	0	0	1	0	2	0	0	0	0	4	1	1	1	0	0	0	2	1	1	0	0	0	0	0	0	1	0	0	0	1	2	0	4	1	0	0	0	2	2	1	0	1	0	1	0	0	1	1	0
0	1	0	1	0	2	0	0	1	1	3	0	1	1	0	0	0	1	1	1	0	0	1	0	0	0	1	0	0	0	1	0	0	4	1	0	0	0	2	2	1	1	0	0	1	1	0	2	1	0
3	0	2	1	0	3	0	0	0	0	4	0	1	3	0	1	0	3	1	3	0	0	1	0	0	2	1	0	0	0	1	0	0	4	0	0	1	0	0	3	1	0	0	1	1	2	2	2	3	2
2	0	2	1	0	4	0	0	0	0	4	0	1	2	0	1	0	3	1	3	0	0	1	0	0	2	1	0	0	0	0	0	0	3	0	0	1	0	0	3	1	0	1	2	1	2	2	3	2	2
2	0	0	1	0	4	0	0	0	0	3	0	1	1	0	0	0	3	1	1	0	0	1	0	0	2	0	0	1	0	1	2	0	3	0	0	1	1	0	2	1	0	1	1	1	0	0	3	0	1
1	0	0	1	0	3	1	0	0	0	3	2	1	1	0	0	2	2	0	1	0	0	0	1	0	2	1	0	0	0	3	0	0	2	0	0	1	0	1	2	1	0	0	1	1	2	0	2	2	0
3	1	2	1	0	3	0	0	1	1	4	1	1	3	0	1	0	3	1	3	0	0	1	0	0	2	1	0	0	0	1	0	0	3	1	0	1	0	0	3	0	1	0	0	1	3	2	2	3	2
1	0	0	1	2	4	1	0	0	0	3	2	1	1	0	0	0	2	0	1	0	0	0	1	0	2	0	0	1	0	3	0	0	1	1	0	1	1	1	3	0	0	1	0	1	2	0	3	1	0
0	0	0	1	0	4	1	0	0	0	2	2	1	0	0	0	2	2	0	1	0	0	1	1	0	2	1	0	0	0	2	0	0	1	1	0	1	0	1	2	0	0	1	1	1	2	0	3	1	0
2	3	0	1	0	3	0	0	3	1	3	0	1	1	0	0	2	2	0	3	0	0	2	0	0	2	1	0	0	0	1	0	0	3	1	0	1	1	2	3	1	1	2	1	1	1	0	3	1	0
2	2	1	1	1	4	1	0	0	0	2	0	1	2	0	0	0	2	0	1	0	0	1	1	0	3	1	2	0	0	0	0	0	3	1	0	1	0	0	2	0	0	1	1	1	0	0	3	0	0
0	0	1	1	0	4	0	1	0	0	3	0	1	1	0	0	0	2	0	1	0	0	1	0	0	0	0	0	2	0	1	0	0	1	1	0	0	3	2	2	0	0	3	0	1	0	0	4	0	0
2	0	0	1	0	4	0	0	0	0	3	1	1	1	0	0	0	0	0	1	0	0	1	1	0	0	1	0	0	0	3	2	2	3	1	0	0	0	0	3	0	0	3	0	1	2	0	3	1	0
0	0	0	1	0	4	0	0	0	0	3	2	1	1	0	0	2	0	1	2	0	2	1	0	0	0	1	0	0	0	3	0	0	1	1	0	0	0	0	2	0	0	3	0	3	0	0	4	1	0
0	0	2	1	2	4	0	0	0	0	3	1	1	1	0	0	0	0	0	1	0	0	0	1	0	0	1	0	0	0	3	0	0	1	0	0	0	0	0	2	1	0	3	1	1	2	0	3	1	0
0	1	2	1	2	3	0	0	1	1	2	1	1	1	0	0	0	0	0	1	0	0	1	1	0	0	1	0	0	0	3	0	0	1	1	0	0	0	0	2	0	1	2	0	1	3	0	2	1	0
0	0	2	1	2	4	0	0	0	0	2	1	1	1	0	0	0	0	0	1	0	0	1	1	0	0	0	0	1	0	3	0	0	1	1	0	0	1	0	2	0	0	3	0	1	2	0	3	0	0
2	2	0	1	0	2	0	0	0	0	5	0	1	1	0	0	0	1	0	1	0	0	0	0	0	1	0	2	1	0	1	0	0	4	0	0	1	1	2	3	1	0	1	1	1	0	0	3	0	0
0	2	0	1	2	2	0	0	0	0	5	0	1	1	0	0	0	0	0	3	0	0	0	0	0	1	0	2	1	0	3	0	0	4	1	0	0	1	2	2	1	0	1	1	1	2	0	3	2	0
2	0	2	1	0	2	0	0	0	0	5	0	1	3	0	1	0	2	1	3	0	1	0	0	0	0	1	0	0	0	1	0	0	4	0	0	0	0	2	3	2	0	1	1	1	2	2	1	3	2
3	3	0	1	0	1	0	0	1	1	5	1	1	1	0	0	0	1	0	1	0	0	0	0	0	1	1	2	0	0	1	0	0	4	1	0	1	0	2	3	0	1	0	0	1	1	0	2	1	0
1	0	1	1	0	2	0	1	0	0	4	1	1	1	0	0	0	2	0	1	0	0	0	0	0	0	1	0	1	0	1	0	0	3	1	0	0	2	3	2	0	0	1	0	1	0	0	3	1	0
3	0	2	1	0	2	0	0	0	0	5	1	1	3	0	1	0	2	1	3	0	1	0	0	0	0	1	0	0	0	1	0	0	4	1	0	0	0	2	3	1	0	1	0	1	2	2	1	3	2
2	2	0	1	0	2	0	0	0	0	4	0	1	1	0	0	0	1	0	1	0	0	1	0	0	1	0	2	1	0	1	0	0	4	1	0	1	1	2	3	0	0	1	0	1	0	0	3	0	0
3	0	2	1	0	1	0	0	0	0	4	0	1	3	0	1	0	2	1	3	0	1	1	0	0	0	1	0	0	0	1	0	0	5	1	0	0	0	2	3	1	0	0	0	1	2	2	0	3	2
2	0	0	1	0	2	0	0	0	0	3	0	1	2	0	0	0	2	1	1	0	0	1	0	0	0	1	0	0	0	0	0	0	4	1	0	0	0	2	2	1	0	1	1	1	0	0	1	0	0
1	0	0	1	0	1	0	0	0	0	3	0	1	1	0	0	0	2	1	1	0	0	1	0	0	0	1	0	0	0	1	0	0	4	1	0	0	2	3	2	2	0	0	0	1	0	0	2	1	0
0	1	0	1	0	3	0	0	1	1	4	2	1	1	0	0	2	2	1	1	0	2	1	0	0	2	1	0	0	0	3	0	0	1	0	0	1	0	0	2	1	1	0	1	3	1	0	3	1	1
1	0	0	1	2	3	1	0	0	0	3	1	1	1	0	0	0	2	0	1	0	0	0	1	0	2	1	0	0	0	3	0	0	2	0	0	1	0	1	3	1	0	0	1	1	2	0	2	2	0
4	0	0	1	0	3	0	0	0	0	3	1	1	1	0	0	0	3	1	1	0	0	1	0	0	2	1	0	0	0	1	2	0	4	1	0	1	0	0	2	0	0	0	0	1	0	0	2	1	1
1	0	0	1	0	4	1	0	0	0	3	3	1	1	0	0	2	2	0	1	0	0	0	1	0	2	0	0	1	0	3	0	0	1	1	0	1	1	1	2	0	0	1	0	1	2	0	3	1	0
0	0	1	1	0	4	0	1	0	0	2	0	1	1	0	0	0	2	0	1	0	2	2	0	0	2	1	0	1	0	1	0	0	1	1	0	1	0	0	2	0	0	3	0	1	0	0	4	1	0
0	1	0	1	0	3	0	0	1	1	2	0	1	3	0	0	0	3	1	1	0	0	2	0	0	2	1	0	0	0	1	0	0	1	1	0	1	0	0	2	0	1	0	0	1	1	0	2	1	1
2	3	1	1	1	3	1	0	1	1	2	0	1	3	0	0	0	2	0	1	0	0	1	1	0	3	1	2	0	0	1	0	0	3	1	0	1	0	0	2	0	1	0	0	1	1	0	2	1	0
0	0	1	1	2	4	0	0	0	0	3	1	1	1	0	0	0	2	0	2	0	0	1	1	0	2	1	0	0	0	3	0	0	1	1	0	3	0	0	2	1	0	1	0	3	0	0	4	2	0
0	0	1	1	0	4	0	1	0	0	4	0	1	1	0	0	0	2	0	1	0	0	0	0	0	0	1	0	1	0	1	0	0	1	0	0	0	2	2	2	1	0	3	1	1	0	0	4	1	0
3	0	0	1	0	3	0	0	0	0	4	1	1	1	0	0	0	0	0	1	0	0	0	1	0	0	1	0	0	0	3	2	2	4	0	0	0	0	0	3	1	0	2	1	1	2	0	2	1	0
2	2	0	1	2	3	0	0	0	0	4	1	1	1	0	0	0	0	1	3	0	0	0	0	0	1	1	2	0	0	3	0	0	4	2	0	0	0	0	2	0	0	2	0	1	2	0	3	3	0
2	0	2	1	0	4	0	0	0	0	3	0	1	3	0	1	0	1	1	3	0	1	1	0	0	0	1	0	0	0	1	0	0	3	1	0	0	0	0	3	0	0	3	0	1	2	2	3	3	2
2	0	0	1	2	3	0	0	0	0	3	2	1	1	0	0	0	0	0	1	0	0	0	1	0	0	1	0	0	0	3	0	0	2	1	0	0	0	0	3	0	0	2	0	1	2	0	2	1	0
3	3	0	1	1	3	0	0	1	1	3	1	1	3	0	0	0	0	1	1	0	0	0	1	0	1	1	2	0	0	1	0	0	3	1	0	0	0	0	2	0	1	2	0	1	1	0	2	1	0
0	0	1	1	0	2	0	1	0	0	4	0	1	1	0	0	0	2	0	1	0	0	0	0	0	0	0	0	2	0	1	0	0	3	0	0	0	3	3	2	1	0	1	1	1	0	0	3	0	0
1	0	1	1	0	2	0	1	0	0	4	1	1	1	0	0	0	2	0	1	0	0	0	0	0	0	0	0	2	0	1	0	0	3	1	0	0	3	3	2	0	0	1	0	1	0	0	3	0	0
3	0	0	1	0	2	0	0	0	0	5	2	1	1	0	0	0	0	0	1	0	0	0	1	0	0	1	0	0	0	3	2	2	4	1	0	0	0	2	3	0	0	1	0	1	2	0	1	1	0
0	3	0	1	2	1	0	0	1	1	4	0	1	1	0	0	0	0	0	3	0	0	1	0	0	1	1	2	0	0	3	0	0	4	2	0	0	0	2	2	0	1	0	0	1	3	0	2	3	0
3	0	0	1	0	1	0	0	0	0	4	0	1	1	0	0	0	2	1	1	0	0	0	0	0	0	1	0	0	0	1	2	0	5	0	0	0	0	2	2	2	0	0	1	1	0	0	0	1	0
2	1	0	1	0	1	0	0	1	1	4	0	1	3	0	0	0	2	1	1	0	0	0	0	0	0	1	0	0	0	1	0	0	4	0	0	0	0	2	2	2	1	0	1	1	1	0	0	1	0
1	0	0	1	0	2	0	0	0	0	3	0	1	1	0	0	0	1	1	1	0	0	1	0	0	0	1	0	0	0	1	0	0	5	1	0	0	0	2	2	1	0	0	0	1	0	0	2	1	0
3	0	0	1	0	3	0	0	0	0	3	0	1	3	0	0	0	3	1	1	0	0	1	0	0	2	1	0	0	0	1	0	0	4	0	0	1	0	0	2	1	0	0	1	1	0	0	2	1	1
0	0	1	1	0	4	0	1	0	0	3	0	1	1	0	0	0	3	0	1	0	0	1	0	0	2	0	0	2	0	1	0	0	1	0	0	1	3	2	2	1	0	1	1	1	0	0	4	0	0
2	0	0	1	0	4	1	0	0	0	4	1	1	1	0	0	0	2	0	1	0	0	0	1	0	2	0	0	1	0	3	2	2	3	0	0	1	1	1	3	1	0	1	1	1	2	0	3	1	0
3	2	0	1	0	3	0	0	2	0	4	0	1	1	0	0	2	2	0	3	0	0	1	0	0	2	1	0	0	0	1	0	0	4	0	0	1	1	2	3	2	0	2	2	1	0	0	3	1	0
0	0	1	1	2	4	0	0	0	0	4	1	1	0	0	0	0	2	0	2	0	0	0	1	0	2	1	0	0	0	2	0	0	1	0	0	3	0	0	2	2	0	1	2	3	0	0	4	1	0
1	1	0	1	0	3	1	2	3	1	4	2	1	1	0	0	0	2	0	1	0	0	0	1	0	2	1	2	0	0	3	0	0	1	1	0	3	0	1	2	0	1	0	0	1	3	0	2	2	0
1	0	0	1	0	4	0	0	0	0	4	3	1	0	0	0	2	2	1	1	0	2	1	0	0	2	1	0	0	0	2	0	0	1	1	0	1	0	0	2	0	0	1	1	3	0	0	4	0	1
1	0	0	1	0	4	0	0	0	0	3	1	1	0	0	0	0	2	1	1	0	0	1	0	0	2	1	0	0	0	0	0	0	3	1	0	1	0	0	2	0	0	1	1	1	0	0	4	0	1
0	0	1	1	0	4	0	1	0	0	2	0	1	1	0	0	0	2	0	1	0	2	2	0	0	2	0	0	2	0	1	0	0	1	1	0	1	1	0	2	0	0	3	0	1	0	0	4	0	0
0	0	0	1	0	4	1	2	2	0	3	1	1	1	0	0	0	2	0	1	0	0	1	1	0	2	1	2	0	0	3	0	0	1	1	0	3	0	1	2	0	0	1	0	1	2	0	3	2	0
2	1	2	1	0	3	0	0	1	1	3	0	1	3	0	1	0	3	1	3	0	0	2	0	0	2	1	0	0	0	1	0	0	3	1	0	1	0	0	3	0	1	0	0	1	3	2	2	3	2
0	0	0	1	0	4	0	0	0	0	2	0	1	1	0	0	0	2	1	1	0	0	2	0	0	2	0	0	1	0	1	0	0	3	1	0	1	1	0	2	0	0	1	0	1	0	0	4	0	1
2	0	2	1	0	4	0	0	0	0	4	0	1	3	0	1	0	1	1	3	0	1	0	0	0	0	1	0	0	0	1	0	0	3	0	0	0	0	0	3	1	0	3	1	1	2	2	3	3	2
2	0	1	1	0	3	0	1	0	0	4	1	1	1	0	0	0	2	0	1	0	0	0	0	0	0	1	0	1	0	1	0	0	2	1	0	0	2	2	2	0	0	2	0	1	0	0	3	1	0
1	1	1	1	0	3	0	1	1	1	4	1	1	1	0	0	0	2	0	1	0	0	0	0	0	0	1	0	1	0	1	0	0	1	1	0	0	2	2	2	0	1	2	0	1	1	0	3	1	0
3	1	0	1	0	3	0	0	1	1	4	2	1	1	0	0	0	0	0	1	0	0	0	1	0	0	1	0	0	0	3	2	2	3	1	0	0	0	0	3	0	1	2	0	1	3	0	2	1	0
2	0	0	1	0	3	0	0	0	0	4	3	1	1	0	0	2	0	1	2	0	2	0	0	0	0	1	0	0	0	3	0	0	2	1	0	0	0	0	2	0	0	2	0	3	0	0	3	1	0
3	0	2	1	0	3	0	0	0	0	3	0	1	3	0	1	0	1	1	3	0	1	1	0	0	0	1	0	0	0	1	0	0	4	1	0	0	0	0	3	0	0	2	0	1	2	2	2	3	2
0	0	2	1	2	4	0	0	0	0	3	1	1	1	0	0	0	0	0	1	0	0	0	1	0	0	0	0	1	0	3	0	0	1	0	0	0	1	0	2	1	0	3	1	1	2	0	3	0	0
0	0	0	1	0	4	0	0	0	0	4	1	3	1	0	0	0	0	0	3	0	0	0	1	0	0	0	0	1	0	3	0	0	1	0	0	0	1	0	3	1	2	4	1	1	2	0	4	0	0
3	2	0	1	0	3	0	0	2	0	4	0	1	1	0	0	2	0	0	3	0	0	0	0	0	0	1	0	0	0	1	0	0	4	0	0	0	1	2	3	1	0	3	2	1	0	0	3	1	0
4	2	0	1	0	3	0	0	2	0	4	1	1	1	0	0	2	0	0	3	0	0	0	0	0	0	1	0	0	0	1	0	0	4	1	0	0	1	2	3	0	0	3	1	1	0	0	3	1	0
3	2	0	1	1	4	0	0	0	0	3	1	1	3	0	0	0	0	1	1	0	0	0	1	0	1	0	2	1	0	1	0	0	3	1	0	0	1	0	2	0	0	3	0	1	0	0	3	0	0
2	3	0	1	1	3	0	0	1	1	2	0	1	3	0	0	0	0	1	1	0	0	1	1	0	1	1	2	0	0	1	0	0	3	1	0	0	0	0	2	0	1	2	0	1	1	0	2	1	0
3	0	0	1	0	1	0	0	0	0	5	1	1	1	0	0	0	0	0	1	0	0	0	1	0	0	1	0	0	0	3	2	2	5	0	0	0	0	2	3	1	0	0	1	1	2	0	0	1	0
3	2	0	1	0	2	0	0	0	0	5	1	1	0	0	0	0	1	0	1	0	0	0	0	0	1	1	2	0	0	0	0	0	4	1	0	1	0	2	3	0	0	1	1	1	0	0	3	0	0
2	3	0	1	0	1	0	0	1	1	4	0	1	1	0	0	0	1	0	1	0	0	1	0	0	1	1	2	0	0	1	0	0	4	1	0	1	0	2	3	0	1	0	0	1	1	0	2	1	0
2	0	0	1	0	2	0	0	0	0	3	0	1	1	0	0	0	2	1	1	0	0	1	0	0	0	1	0	0	0	1	2	0	4	1	0	0	0	2	2	1	0	1	0	1	0	0	1	1	0
0	0	0	1	0	3	0	0	0	0	3	0	1	3	0	0	0	2	1	1	0	0	1	0	0	0	0	0	1	0	1	0	0	3	1	0	0	1	2	2	1	0	1	0	1	0	0	1	0	0
[truncated: 85 more columns]

## Sheet: Figure S7_SVR
0	1	2	3	4	5	6	7	8	9	10	11	12	13	14	15	16	17	18	19	20	21	22	23	24	25	26	27	28	29	30	31	32	33	34	35	36	37	38	39	40	41	42	43	44	45	46	47	48	49
0	0	0	1	0	4	0	0	0	0	3	0	1	2	0	0	0	3	1	1	0	0	1	0	0	2	1	0	0	0	0	0	0	1	0	0	1	0	0	2	1	0	1	2	1	0	0	3	0	1
1	0	0	1	0	4	1	0	0	0	3	3	1	1	0	0	2	2	0	1	0	0	0	1	0	2	1	0	0	0	3	0	0	1	1	0	1	0	1	2	0	0	1	0	1	2	0	3	2	0
3	3	1	1	1	3	1	0	1	1	3	1	1	3	0	0	0	2	0	1	0	0	0	1	0	3	1	2	0	0	1	0	0	3	1	0	1	0	0	2	0	1	0	0	1	1	0	2	1	0
2	0	0	1	0	4	1	0	0	0	3	1	1	1	0	0	0	2	0	1	0	0	1	1	0	2	0	0	1	0	3	2	2	3	1	0	1	1	1	3	0	0	1	0	1	2	0	3	1	0
2	0	0	1	0	4	1	0	0	0	3	1	1	0	0	0	0	2	0	1	0	0	1	1	0	2	1	0	0	0	2	2	2	3	1	0	1	0	1	3	0	0	1	1	1	2	0	3	1	0
0	0	1	1	0	4	0	1	0	0	2	0	1	0	0	0	0	2	0	1	0	2	2	0	0	2	1	0	1	0	0	0	0	1	1	0	1	0	0	2	0	0	3	1	1	0	0	4	0	0
0	0	0	1	0	4	1	2	2	0	3	1	1	1	0	0	0	2	0	1	0	0	1	1	0	2	0	2	1	0	3	0	0	1	1	0	3	1	1	2	0	0	1	0	1	2	0	3	1	0
1	0	0	1	0	3	0	0	0	0	2	0	1	3	0	0	0	3	1	1	0	0	2	0	0	2	1	0	0	0	1	0	0	2	1	0	1	0	0	2	0	0	0	0	1	0	0	2	1	1
1	0	1	1	0	3	0	1	0	0	4	0	1	1	0	0	0	2	0	1	0	0	0	0	0	0	1	0	1	0	1	0	0	2	0	0	0	2	2	2	1	0	2	1	1	0	0	3	1	0
1	2	0	1	2	3	0	0	0	0	4	0	1	1	0	0	0	0	1	3	0	0	0	0	0	1	1	2	0	0	3	0	0	4	1	0	0	0	0	2	1	0	2	1	1	2	0	3	3	0
4	0	0	1	0	3	0	0	0	0	4	2	1	1	0	0	0	0	0	1	0	0	0	1	0	0	1	0	0	0	3	2	2	4	1	0	0	0	0	3	0	0	2	0	1	2	0	2	1	0
1	1	0	1	0	3	0	0	1	1	4	3	1	1	0	0	2	0	1	2	0	2	0	0	0	0	1	0	0	0	3	0	0	1	1	0	0	0	0	2	0	1	2	0	3	1	0	3	1	0
1	0	0	1	0	4	0	0	0	0	4	3	1	0	0	0	2	0	1	2	0	2	0	0	0	0	1	0	0	0	2	0	0	1	1	0	0	0	0	2	0	0	3	1	3	0	0	4	0	0
3	2	0	1	0	4	0	0	2	0	4	1	1	0	0	0	2	0	0	3	0	0	0	0	0	0	1	0	0	0	0	0	0	3	1	0	0	1	2	3	0	0	4	2	1	0	0	4	0	0
2	2	0	1	0	2	0	0	0	0	4	0	1	1	0	0	0	1	0	1	0	0	1	0	0	1	1	2	0	0	1	0	0	4	1	0	1	0	2	3	0	0	1	0	1	0	0	3	1	0
1	0	1	1	0	1	0	1	0	0	3	0	1	1	0	0	0	2	0	1	0	0	1	0	0	0	1	0	1	0	1	0	0	4	1	0	0	2	3	2	0	0	0	0	1	0	0	2	1	0
0	0	1	1	0	2	0	1	0	0	3	0	1	1	0	0	0	2	0	1	0	0	1	0	0	0	0	0	2	0	1	0	0	3	1	0	0	3	3	2	0	0	1	0	1	0	0	3	0	0
0	2	0	1	2	2	0	0	0	0	4	0	1	1	0	0	0	0	0	3	0	0	1	0	0	1	0	2	1	0	3	0	0	4	2	0	0	1	2	2	0	0	1	0	1	2	0	3	2	0
2	0	2	1	0	2	0	0	0	0	4	0	1	2	0	1	0	2	1	3	0	1	1	0	0	0	1	0	0	0	0	0	0	4	1	0	0	0	2	3	1	0	1	1	1	2	2	1	2	2
0	1	0	1	0	1	0	0	1	1	4	0	1	1	0	0	0	2	1	1	0	0	0	0	0	0	1	0	0	0	1	0	0	3	0	0	0	2	3	2	3	1	0	1	1	1	0	2	1	0
1	0	0	1	0	3	0	0	0	0	4	1	1	1	0	0	0	1	1	1	0	0	0	0	0	0	1	0	0	0	1	0	0	4	1	0	0	0	2	2	1	0	1	0	1	0	0	3	1	0
1	0	0	1	0	3	0	0	0	0	4	1	1	0	0	0	0	1	1	1	0	0	0	0	0	0	1	0	0	0	0	0	0	4	1	0	0	0	2	2	1	0	1	1	1	0	0	3	0	0
0	0	0	1	0	3	0	0	0	0	3	0	1	1	0	0	0	1	1	1	0	0	1	0	0	0	1	0	0	0	1	0	0	4	1	0	0	0	2	2	1	0	1	0	1	0	0	3	1	0
0	0	0	1	0	4	0	0	0	0	3	0	1	3	0	0	0	3	1	1	0	0	1	0	0	2	0	0	1	0	1	0	0	1	0	0	1	1	0	2	1	0	1	1	1	0	0	3	0	1
2	3	1	1	1	3	1	0	1	1	3	0	1	3	0	0	0	2	0	1	0	0	0	1	0	3	1	2	0	0	1	0	0	3	0	0	1	0	0	2	1	1	0	1	1	1	0	2	1	0
1	0	0	1	0	4	0	0	0	0	3	1	1	3	0	0	0	3	1	1	0	0	1	0	0	2	0	0	1	0	1	0	0	1	1	0	1	1	0	2	0	0	1	0	1	0	0	3	0	1
2	0	0	1	0	3	1	0	0	0	3	3	1	1	0	0	2	2	0	1	0	0	0	1	0	2	1	0	0	0	3	0	0	2	1	0	1	0	1	2	0	0	0	0	1	2	0	2	2	0
2	0	2	1	0	4	0	0	0	0	3	0	1	3	0	1	0	3	1	3	0	0	2	0	0	2	1	0	0	0	1	0	0	3	1	0	1	0	0	3	0	0	1	0	1	2	2	3	3	2
0	0	0	1	0	4	0	0	0	0	2	0	1	1	0	0	0	2	1	1	0	0	2	0	0	2	1	0	0	0	1	0	0	3	1	0	1	0	0	2	0	0	1	0	1	0	0	4	1	1
2	2	0	1	0	4	0	0	0	0	4	0	1	0	0	0	0	1	0	1	0	0	0	0	0	1	1	2	0	0	0	0	0	3	0	0	0	0	0	3	1	0	3	2	1	0	0	4	0	0
3	2	0	1	0	4	0	0	0	0	4	1	1	1	0	0	0	1	0	1	0	0	0	0	0	1	0	2	1	0	1	0	0	3	1	0	0	1	0	3	0	0	3	0	1	0	0	4	0	0
1	0	1	1	0	4	0	1	0	0	4	1	1	0	0	0	0	2	0	1	0	0	0	0	0	0	1	0	1	0	0	0	0	1	1	0	0	2	2	2	0	0	3	1	1	0	0	4	0	0
3	0	0	1	0	4	0	0	0	0	4	2	1	1	0	0	0	0	0	1	0	0	0	1	0	0	1	0	0	0	3	2	2	3	1	0	0	0	0	3	0	0	3	0	1	2	0	3	1	0
3	0	0	1	0	4	0	0	0	0	4	2	1	1	0	0	0	0	0	1	0	0	0	1	0	0	0	0	1	0	3	2	2	3	1	0	0	1	0	3	0	0	3	0	1	2	0	3	0	0
0	2	0	1	2	4	0	0	0	0	3	0	1	1	0	0	0	0	1	3	0	0	1	0	0	1	0	2	1	0	3	0	0	3	2	0	0	1	0	2	0	0	3	0	1	2	0	4	2	0
2	0	2	1	0	4	0	0	0	0	3	0	1	3	0	1	0	1	1	3	0	1	1	0	0	0	0	0	1	0	1	0	0	3	1	0	0	1	0	3	0	0	3	0	1	2	2	3	2	2
2	2	0	1	0	4	0	0	2	0	4	0	1	1	0	0	2	0	0	3	0	0	0	0	0	0	1	0	0	0	1	0	0	3	0	0	0	1	2	3	1	0	4	2	1	0	0	4	1	0
0	1	0	1	2	3	0	0	1	1	3	1	1	1	0	0	0	0	0	1	0	0	0	1	0	0	1	0	0	0	3	0	0	1	0	0	0	0	0	3	1	1	2	1	1	3	0	2	1	0
1	0	0	1	0	4	0	0	0	0	4	2	3	0	0	0	0	0	0	3	0	0	0	1	0	0	1	0	0	0	2	0	0	1	1	0	0	0	0	3	0	2	4	1	1	2	0	4	0	0
1	0	0	1	0	3	0	0	0	0	3	1	3	1	0	0	0	0	0	3	0	0	1	1	0	0	1	0	0	0	3	0	0	2	1	0	0	0	0	3	0	2	3	0	1	2	0	3	1	0
2	2	0	1	0	4	0	0	2	0	3	0	1	1	0	0	2	0	0	3	0	0	1	0	0	0	0	0	1	0	1	0	0	3	1	0	0	2	2	3	0	0	4	1	1	0	0	4	0	0
2	0	0	1	0	2	0	0	0	0	4	0	1	1	0	0	0	2	1	1	0	0	0	0	0	0	1	0	0	0	1	2	0	4	0	0	0	0	2	2	2	0	1	1	1	0	0	1	1	0
3	0	0	1	0	1	0	0	0	0	4	0	1	3	0	0	0	2	1	1	0	0	0	0	0	0	1	0	0	0	1	0	0	5	0	0	0	0	2	2	2	0	0	1	1	0	0	0	1	0
3	1	0	1	0	1	0	0	1	1	4	1	1	3	0	0	0	2	1	1	0	0	0	0	0	0	1	0	0	0	1	0	0	4	1	0	0	0	2	2	1	1	0	0	1	1	0	0	1	0
0	2	0	1	2	4	0	0	0	0	4	0	1	1	0	0	0	0	1	3	0	0	0	0	0	1	1	2	0	0	3	0	0	3	1	0	0	0	0	2	1	0	3	1	1	2	0	4	3	0
2	0	2	1	0	4	0	0	0	0	4	0	1	3	0	1	0	1	1	3	0	1	0	0	0	0	0	0	1	0	1	0	0	3	0	0	0	1	0	3	1	0	3	1	1	2	2	3	2	2
1	0	1	1	0	4	0	1	0	0	4	1	1	1	0	0	0	2	0	1	0	0	0	0	0	0	1	0	1	0	1	0	0	1	1	0	0	2	2	2	0	0	3	0	1	0	0	4	1	0
0	0	1	1	0	4	0	1	0	0	3	0	1	1	0	0	0	2	0	1	0	0	1	0	0	0	1	0	1	0	1	0	0	1	1	0	0	2	2	2	0	0	3	0	1	0	0	4	1	0
0	0	0	1	0	4	0	0	0	0	3	2	1	0	0	0	2	0	1	2	0	2	1	0	0	0	1	0	0	0	2	0	0	1	1	0	0	0	0	2	0	0	3	1	3	0	0	4	0	0
1	1	2	1	2	3	0	0	1	1	3	2	1	1	0	0	0	0	0	1	0	0	0	1	0	0	1	0	0	0	3	0	0	1	1	0	0	0	0	2	0	1	2	0	1	3	0	2	1	0
1	0	2	1	2	4	0	0	0	0	3	2	1	1	0	0	0	0	0	1	0	0	0	1	0	0	0	0	1	0	3	0	0	1	1	0	0	1	0	2	0	0	3	0	1	2	0	3	0	0
1	0	0	1	2	4	0	0	0	0	3	2	1	1	0	0	0	0	0	1	0	0	0	1	0	0	0	0	1	0	3	0	0	1	1	0	0	1	0	3	0	0	3	0	1	2	0	3	0	0
2	2	0	1	1	4	0	0	0	0	2	0	1	2	0	0	0	0	1	1	0	0	1	1	0	1	1	2	0	0	0	0	0	3	1	0	0	0	0	2	0	0	3	1	1	0	0	3	0	0
2	2	0	1	0	2	0	0	0	0	5	0	1	0	0	0	0	1	0	1	0	0	0	0	0	1	1	2	0	0	0	0	0	4	0	0	1	0	2	3	1	0	1	2	1	0	0	3	0	0
1	1	1	1	0	1	0	1	1	1	4	1	1	1	0	0	0	2	0	1	0	0	0	0	0	0	1	0	1	0	1	0	0	3	1	0	0	2	3	2	0	1	0	0	1	1	0	2	1	0
3	1	0	1	0	1	0	0	1	1	5	2	1	1	0	0	0	0	0	1	0	0	0	1	0	0	1	0	0	0	3	2	2	4	1	0	0	0	2	3	0	1	0	0	1	3	0	0	1	0
1	1	0	1	0	2	0	0	1	1	5	3	1	1	0	0	2	1	1	1	0	2	0	0	0	0	1	0	0	0	3	0	0	3	1	0	0	0	2	2	1	1	0	0	3	1	0	2	1	0
0	1	1	1	0	1	0	1	1	1	3	0	1	1	0	0	0	2	0	1	0	0	1	0	0	0	1	0	1	0	1	0	0	3	1	0	0	2	3	2	0	1	0	0	1	1	0	2	1	0
0	1	0	1	0	2	0	0	1	1	4	0	1	3	0	0	0	2	1	1	0	0	0	0	0	0	1	0	0	0	1	0	0	3	0	0	0	0	2	2	2	1	0	1	1	1	0	0	1	0
2	0	0	1	0	2	0	0	0	0	4	0	1	3	0	0	0	2	1	1	0	0	0	0	0	0	0	0	1	0	1	0	0	4	0	0	0	1	2	2	2	0	1	1	1	0	0	1	0	0
2	1	0	1	0	1	0	0	1	1	3	0	1	1	0	0	0	2	1	1	0	0	1	0	0	0	1	0	0	0	1	2	0	4	1	0	0	0	2	2	1	1	0	0	1	1	0	0	1	0
0	0	1	1	0	4	0	1	0	0	3	0	1	1	0	0	0	2	0	1	0	2	1	0	0	2	0	0	2	0	1	0	0	1	0	0	1	1	0	2	1	0	3	1	1	0	0	4	0	0
0	0	0	1	0	4	1	2	2	0	4	1	1	1	0	0	0	2	0	1	0	0	0	1	0	2	0	2	1	0	3	0	0	1	0	0	3	1	1	2	1	0	1	1	1	2	0	3	1	0
2	2	1	1	2	3	1	0	0	0	4	1	1	1	0	0	0	2	0	3	0	0	0	0	0	3	1	2	0	0	3	0	0	4	2	0	1	0	0	2	0	0	0	0	1	2	0	3	3	0
1	0	0	1	0	3	1	2	2	0	3	1	1	1	0	0	0	2	0	1	0	0	1	1	0	2	1	2	0	0	3	0	0	2	1	0	3	0	1	2	0	0	0	0	1	2	0	2	2	0
0	1	0	1	0	3	0	0	1	1	3	2	1	1	0	0	2	2	1	1	0	2	2	0	0	2	1	0	0	0	3	0	0	1	1	0	1	0	0	2	0	1	0	0	3	1	0	3	1	1
2	0	0	1	0	4	0	0	0	0	2	0	1	1	0	0	0	3	1	1	0	0	2	0	0	2	0	0	1	0	1	2	0	3	1	0	1	1	0	2	0	0	1	0	1	0	0	3	0	1
0	1	0	1	0	3	0	0	1	1	2	0	1	1	0	0	0	2	1	1	0	0	2	0	0	2	1	0	0	0	1	0	0	3	1	0	1	0	0	2	0	1	0	0	1	1	0	3	1	1
0	0	1	1	2	4	0	0	0	0	3	1	1	0	0	0	0	2	0	2	0	0	1	1	0	2	1	0	0	0	2	0	0	1	1	0	3	0	0	2	1	0	1	1	3	0	0	4	1	0
0	0	2	1	2	4	0	0	0	0	3	1	1	0	0	0	0	0	0	1	0	0	0	1	0	0	1	0	0	0	2	0	0	1	0	0	0	0	0	2	1	0	3	2	1	2	0	3	0	0
1	0	0	1	2	3	0	0	0	0	3	1	1	1	0	0	0	0	0	1	0	0	0	1	0	0	1	0	0	0	3	0	0	2	0	0	0	0	0	3	1	0	2	1	1	2	0	2	1	0
0	0	0	1	2	4	0	0	0	0	3	1	1	0	0	0	0	0	0	1	0	0	0	1	0	0	1	0	0	0	2	0	0	1	0	0	0	0	0	3	1	0	3	2	1	2	0	3	0	0
2	3	0	1	1	3	0	0	1	1	3	0	1	3	0	0	0	0	1	1	0	0	0	1	0	1	1	2	0	0	1	0	0	3	0	0	0	0	0	2	1	1	2	1	1	1	0	2	1	0
2	2	0	1	1	4	0	0	0	0	3	0	1	2	0	0	0	0	1	1	0	0	0	1	0	1	1	2	0	0	0	0	0	3	0	0	0	0	0	2	1	0	3	2	1	0	0	3	0	0
0	0	0	1	0	4	0	0	0	0	3	1	3	1	0	0	0	0	0	3	0	0	1	1	0	0	1	0	0	0	3	0	0	1	1	0	0	0	0	3	0	2	4	0	1	2	0	4	1	0
2	3	0	1	0	1	0	0	1	1	5	0	1	1	0	0	0	1	0	1	0	0	0	0	0	1	1	2	0	0	1	0	0	4	0	0	1	0	2	3	1	1	0	1	1	1	0	2	1	0
0	1	1	1	0	1	0	1	1	1	4	0	1	1	0	0	0	2	0	1	0	0	0	0	0	0	1	0	1	0	1	0	0	3	0	0	0	2	3	2	1	1	0	1	1	1	0	2	1	0
1	0	0	1	0	2	0	0	0	0	5	2	1	1	0	0	2	1	1	1	0	2	0	0	0	0	1	0	0	0	3	0	0	4	0	0	0	0	2	2	2	0	0	1	3	0	0	2	1	0
3	0	2	1	0	2	0	0	0	0	5	1	1	3	0	1	0	2	1	3	0	1	0	0	0	0	0	0	1	0	1	0	0	4	1	0	0	1	2	3	1	0	1	0	1	2	2	1	2	2
2	0	0	1	0	2	0	0	0	0	4	1	1	0	0	0	0	0	0	1	0	0	1	1	0	0	1	0	0	0	2	2	2	4	1	0	0	0	2	3	0	0	1	1	1	2	0	1	0	0
2	1	2	1	0	1	0	0	1	1	4	0	1	3	0	1	0	2	1	3	0	1	1	0	0	0	1	0	0	0	1	0	0	4	1	0	0	0	2	3	1	1	0	0	1	3	2	0	3	2
0	0	0	1	0	2	0	0	0	0	3	0	1	1	0	0	0	2	1	1	0	0	1	0	0	0	1	0	0	0	1	0	0	3	1	0	0	2	3	2	2	0	1	0	1	0	0	3	1	0
0	2	1	1	2	4	1	0	0	0	4	0	1	1	0	0	0	2	0	3	0	0	0	0	0	3	1	2	0	0	3	0	0	3	1	0	1	0	0	2	1	0	1	1	1	2	0	4	3	0
0	0	1	1	0	4	0	1	0	0	3	0	1	0	0	0	0	2	0	1	0	2	1	0	0	2	1	0	1	0	0	0	0	1	0	0	1	0	0	2	1	0	3	2	1	0	0	4	0	0
0	0	0	1	0	4	1	2	2	0	4	1	1	1	0	0	0	2	0	1	0	0	0	1	0	2	1	2	0	0	3	0	0	1	0	0	3	0	1	2	1	0	1	1	1	2	0	3	2	0
2	2	1	1	1	4	1	0	0	0	3	0	1	3	0	0	0	2	0	1	0	0	0	1	0	3	0	2	1	0	1	0	0	3	0	0	1	1	0	2	1	0	1	1	1	0	0	3	0	0
0	0	1	1	2	4	0	0	0	0	4	1	1	1	0	0	0	2	0	2	0	0	0	1	0	2	1	0	0	0	3	0	0	1	0	0	3	0	0	2	2	0	1	1	3	0	0	4	2	0
1	0	1	1	0	4	0	1	0	0	3	1	1	1	0	0	0	2	0	1	0	2	1	0	0	2	1	0	1	0	1	0	0	1	1	0	1	0	0	2	0	0	3	0	1	0	0	4	1	0
1	0	0	1	0	4	0	0	0	0	4	3	1	1	0	0	2	2	1	1	0	2	1	0	0	2	1	0	0	0	3	0	0	1	1	0	1	0	0	2	0	0	1	0	3	0	0	4	1	1
1	0	0	1	0	4	1	0	0	0	4	2	3	1	0	0	0	2	0	3	0	0	0	1	0	2	1	0	0	0	3	0	0	1	1	0	1	0	1	3	0	2	3	0	1	2	0	4	2	0
3	3	0	1	0	3	0	0	3	1	4	1	1	1	0	0	2	2	0	3	0	0	1	0	0	2	1	0	0	0	1	0	0	3	1	0	1	1	2	3	1	1	2	1	1	1	0	3	1	0
0	0	0	1	0	4	0	0	0	0	3	2	1	0	0	0	2	2	1	1	0	2	2	0	0	2	1	0	0	0	2	0	0	1	1	0	1	0	0	2	0	0	1	1	3	0	0	4	0	1
3	0	2	1	0	3	0	0	0	0	3	0	1	3	0	1	0	3	1	3	0	0	2	0	0	2	1	0	0	0	1	0	0	4	1	0	1	0	0	3	0	0	0	0	1	2	2	2	3	2
2	0	0	1	0	4	0	0	0	0	4	1	1	1	0	0	0	0	0	1	0	0	0	1	0	0	0	0	1	0	3	2	2	3	0	0	0	1	0	3	1	0	3	1	1	2	0	3	0	0
0	3	0	1	2	3	0	0	1	1	4	0	1	1	0	0	0	0	1	3	0	0	0	0	0	1	1	2	0	0	3	0	0	3	1	0	0	0	0	2	1	1	2	1	1	3	0	3	3	0
2	1	2	1	0	3	0	0	1	1	4	0	1	3	0	1	0	1	1	3	0	1	0	0	0	0	1	0	0	0	1	0	0	3	0	0	0	0	0	3	1	1	2	1	1	3	2	2	3	2
1	0	0	1	0	4	0	0	0	0	4	3	1	1	0	0	2	0	1	2	0	2	0	0	0	0	1	0	0	0	3	0	0	1	1	0	0	0	0	2	0	0	3	0	3	0	0	4	1	0
0	1	1	1	0	3	0	1	1	1	3	0	1	1	0	0	0	2	0	1	0	0	1	0	0	0	1	0	1	0	1	0	0	1	1	0	0	2	2	2	0	1	2	0	1	1	0	3	1	0
2	0	2	1	2	3	0	0	0	0	3	2	1	1	0	0	0	0	0	1	0	0	0	1	0	0	1	0	0	0	3	0	0	2	1	0	0	0	0	2	0	0	2	0	1	2	0	2	1	0
0	0	2	1	2	4	0	0	0	0	2	1	1	0	0	0	0	0	0	1	0	0	1	1	0	0	1	0	0	0	2	0	0	1	1	0	0	0	0	2	0	0	3	1	1	2	0	3	0	0
2	0	0	1	0	2	0	0	0	0	5	1	1	0	0	0	0	0	0	1	0	0	0	1	0	0	1	0	0	0	2	2	2	4	0	0	0	0	2	3	1	0	1	2	1	2	0	1	0	0
0	1	0	1	0	2	0	0	1	1	5	2	1	1	0	0	2	1	1	1	0	2	0	0	0	0	1	0	0	0	3	0	0	3	0	0	0	0	2	2	2	1	0	1	3	1	0	2	1	0
2	1	2	1	0	1	0	0	1	1	5	0	1	3	0	1	0	2	1	3	0	1	0	0	0	0	1	0	0	0	1	0	0	4	0	0	0	0	2	3	2	1	0	1	1	3	2	0	3	2
4	0	0	1	0	1	0	0	0	0	5	2	1	1	0	0	0	0	0	1	0	0	0	1	0	0	1	0	0	0	3	2	2	5	1	0	0	0	2	3	0	0	0	0	1	2	0	0	1	0
1	3	0	1	2	1	0	0	1	1	5	1	1	1	0	0	0	0	0	3	0	0	0	0	0	1	1	2	0	0	3	0	0	4	2	0	0	0	2	2	0	1	0	0	1	3	0	2	3	0
1	2	0	1	2	1	0	0	0	0	4	0	1	1	0	0	0	0	0	3	0	0	1	0	0	1	1	2	0	0	3	0	0	5	2	0	0	0	2	2	0	0	0	0	1	2	0	2	3	0
0	0	0	1	0	3	0	0	0	0	4	0	1	3	0	0	0	2	1	1	0	0	0	0	0	0	1	0	0	0	1	0	0	3	0	0	0	0	2	2	2	0	1	1	1	0	0	1	1	0
0	0	1	1	0	4	0	1	0	0	3	0	1	0	0	0	0	3	0	1	0	0	1	0	0	2	1	0	1	0	0	0	0	1	0	0	1	2	2	2	1	0	1	2	1	0	0	4	0	0
1	0	0	1	0	3	1	0	0	0	4	1	3	1	0	0	0	2	0	3	0	0	0	1	0	2	1	0	0	0	3	0	0	2	0	0	1	0	1	3	1	2	2	1	1	2	0	3	2	0
0	0	0	1	0	4	1	0	0	0	4	1	3	1	0	0	0	2	0	3	0	0	0	1	0	2	0	0	1	0	3	0	0	1	0	0	1	1	1	3	1	2	3	1	1	2	0	4	1	0
3	2	1	1	1	3	1	0	0	0	3	0	1	3	0	0	0	2	0	1	0	0	0	1	0	3	1	2	0	0	1	0	0	4	0	0	1	0	0	2	1	0	0	1	1	0	0	2	1	0
0	0	1	1	2	4	0	0	0	0	4	1	1	1	0	0	0	2	0	2	0	0	0	1	0	2	0	0	1	0	3	0	0	1	0	0	3	1	0	2	2	0	1	1	3	0	0	4	1	0
4	0	0	1	0	3	1	0	0	0	4	2	1	1	0	0	0	2	0	1	0	0	0	1	0	2	1	0	0	0	3	2	2	4	1	0	1	0	1	3	0	0	0	0	1	2	0	2	2	0
1	0	0	1	0	4	1	2	2	0	4	2	1	0	0	0	0	2	0	1	0	0	0	1	0	2	1	2	0	0	2	0	0	1	1	0	3	0	1	2	0	0	1	1	1	2	0	3	1	0
1	2	1	1	2	4	1	0	0	0	4	1	1	0	0	0	0	2	0	3	0	0	0	0	0	3	1	2	0	0	2	0	0	3	2	0	1	0	0	2	0	0	1	1	1	2	0	4	2	0
3	0	2	1	0	4	0	0	0	0	4	1	1	2	0	1	0	3	1	3	0	0	1	0	0	2	1	0	0	0	0	0	0	3	1	0	1	0	0	3	0	0	1	1	1	2	2	3	2	2
3	2	1	1	1	4	1	0	0	0	3	1	1	3	0	0	0	2	0	1	0	0	0	1	0	3	1	2	0	0	1	0	0	3	1	0	1	0	0	2	0	0	1	0	1	0	0	3	1	0
0	0	0	1	0	4	0	0	0	0	3	2	1	1	0	0	2	2	1	1	0	2	2	0	0	2	0	0	1	0	3	0	0	1	1	0	1	1	0	2	0	0	1	0	3	0	0	4	0	1
0	2	1	1	2	4	1	0	0	0	3	0	1	1	0	0	0	2	0	3	0	0	1	0	0	3	1	2	0	0	3	0	0	3	2	0	1	0	0	2	0	0	1	0	1	2	0	4	3	0
2	1	0	1	0	3	0	0	1	1	2	0	1	1	0	0	0	3	1	1	0	0	2	0	0	2	1	0	0	0	1	2	0	3	1	0	1	0	0	2	0	1	0	0	1	1	0	2	1	1
2	0	0	1	0	4	0	0	0	0	2	0	1	0	0	0	0	3	1	1	0	0	2	0	0	2	1	0	0	0	0	2	0	3	1	0	1	0	0	2	0	0	1	1	1	0	0	3	0	1
0	0	0	1	0	4	0	0	0	0	4	2	1	1	0	0	2	0	1	2	0	2	0	0	0	0	0	0	1	0	3	0	0	1	0	0	0	1	0	2	1	0	3	1	3	0	0	4	0	0
1	2	0	1	2	4	0	0	0	0	4	1	1	1	0	0	0	0	1	3	0	0	0	0	0	1	0	2	1	0	3	0	0	3	2	0	0	1	0	2	0	0	3	0	1	2	0	4	2	0
3	2	0	1	1	3	0	0	0	0	3	0	1	3	0	0	0	0	1	1	0	0	0	1	0	1	1	2	0	0	1	0	0	4	0	0	0	0	0	2	1	0	2	1	1	0	0	2	1	0
1	0	2	1	2	4	0	0	0	0	3	2	1	0	0	0	0	0	0	1	0	0	0	1	0	0	1	0	0	0	2	0	0	1	1	0	0	0	0	2	0	0	3	1	1	2	0	3	0	0
1	1	0	1	0	3	0	0	1	1	4	2	3	1	0	0	0	0	0	3	0	0	0	1	0	0	1	0	0	0	3	0	0	1	1	0	0	0	0	3	0	3	3	0	1	3	0	3	1	0
3	2	0	1	0	4	0	0	2	0	4	1	1	1	0	0	2	0	0	3	0	0	0	0	0	0	1	0	0	0	1	0	0	3	1	0	0	1	2	3	0	0	4	1	1	0	0	4	1	0
2	2	0	1	2	1	0	0	0	0	5	1	1	1	0	0	0	0	0	3	0	0	0	0	0	1	1	2	0	0	3	0	0	5	2	0	0	0	2	2	0	0	0	0	1	2	0	2	3	0
3	0	2	1	0	2	0	0	0	0	5	1	1	2	0	1	0	2	1	3	0	1	0	0	0	0	1	0	0	0	0	0	0	4	1	0	0	0	2	3	1	0	1	1	1	2	2	1	2	2
2	2	0	1	0	2	0	0	0	0	4	0	1	0	0	0	0	1	0	1	0	0	1	0	0	1	1	2	0	0	0	0	0	4	1	0	1	0	2	3	0	0	1	1	1	0	0	3	0	0
2	0	0	1	0	2	0	0	0	0	4	0	1	1	0	0	0	2	1	1	0	0	0	0	0	0	0	0	1	0	1	2	0	4	0	0	0	1	2	2	2	0	1	1	1	0	0	1	0	0
1	1	0	1	0	2	0	0	1	1	4	1	1	3	0	0	0	2	1	1	0	0	0	0	0	0	1	0	0	0	1	0	0	3	1	0	0	0	2	2	1	1	0	0	1	1	0	0	1	0
3	0	0	1	0	2	0	0	0	0	4	1	1	3	0	0	0	2	1	1	0	0	0	0	0	0	0	0	1	0	1	0	0	4	1	0	0	1	2	2	1	0	1	0	1	0	0	1	0	0
1	2	1	1	2	3	1	0	0	0	4	0	1	1	0	0	0	2	0	3	0	0	0	0	0	3	1	2	0	0	3	0	0	4	1	0	1	0	0	2	1	0	0	1	1	2	0	3	3	0
1	0	0	1	0	3	1	2	2	0	4	1	1	1	0	0	0	2	0	1	0	0	0	1	0	2	1	2	0	0	3	0	0	2	0	0	3	0	1	2	1	0	0	1	1	2	0	2	2	0
0	0	0	1	0	4	1	0	0	0	3	2	1	1	0	0	2	2	0	1	0	0	0	1	0	2	1	0	0	0	3	0	0	1	0	0	1	0	1	2	1	0	1	1	1	2	0	3	2	0
2	3	0	1	0	3	0	0	3	1	4	0	1	1	0	0	2	2	0	3	0	0	1	0	0	2	1	0	0	0	1	0	0	3	0	0	1	1	2	3	2	1	2	2	1	1	0	3	1	0
1	3	1	1	2	3	1	0	1	1	4	1	1	1	0	0	0	2	0	3	0	0	0	0	0	3	1	2	0	0	3	0	0	3	2	0	1	0	0	2	0	1	0	0	1	3	0	3	3	0
1	0	0	1	0	4	0	0	0	0	3	1	1	3	0	0	0	3	1	1	0	0	1	0	0	2	1	0	0	0	1	0	0	1	1	0	1	0	0	2	0	0	1	0	1	0	0	3	1	1
4	0	0	1	0	3	0	0	0	0	3	1	1	3	0	0	0	3	1	1	0	0	1	0	0	2	1	0	0	0	1	0	0	4	1	0	1	0	0	2	0	0	0	0	1	0	0	2	1	1
3	0	0	1	0	3	1	0	0	0	3	1	1	1	0	0	0	2	0	1	0	0	1	1	0	2	1	0	0	0	3	2	2	4	1	0	1	0	1	3	0	0	0	0	1	2	0	2	2	0
0	0	0	1	0	4	0	0	0	0	2	0	1	0	0	0	0	2	1	1	0	0	2	0	0	2	1	0	0	0	0	0	0	3	1	0	1	0	0	2	0	0	1	1	1	0	0	4	0	1
0	0	0	1	0	4	1	0	0	0	3	1	3	0	0	0	0	2	0	3	0	0	1	1	0	2	1	0	0	0	2	0	0	1	1	0	1	0	1	3	0	2	3	1	1	2	0	4	1	0
0	0	1	1	2	4	0	0	0	0	3	1	1	1	0	0	0	2	0	2	0	0	1	1	0	2	0	0	1	0	3	0	0	1	1	0	3	1	0	2	1	0	1	0	3	0	0	4	1	0
0	2	0	1	2	4	0	0	0	0	4	0	1	0	0	0	0	0	1	3	0	0	0	0	0	1	1	2	0	0	2	0	0	3	1	0	0	0	0	2	1	0	3	2	1	2	0	4	2	0
0	1	0	1	0	3	0	0	1	1	4	1	3	1	0	0	0	0	0	3	0	0	0	1	0	0	1	0	0	0	3	0	0	1	0	0	0	0	0	3	1	3	3	1	1	3	0	3	1	0
2	2	0	1	0	4	0	0	2	0	4	0	1	0	0	0	2	0	0	3	0	0	0	0	0	0	1	0	0	0	0	0	0	3	0	0	0	1	2	3	1	0	4	3	1	0	0	4	0	0
1	0	0	1	0	4	0	0	0	0	4	2	3	1	0	0	0	0	0	3	0	0	0	1	0	0	0	0	1	0	3	0	0	1	1	0	0	1	0	3	0	2	4	0	1	2	0	4	0	0
2	2	0	1	0	2	0	0	0	0	5	0	1	1	0	0	0	1	0	1	0	0	0	0	0	1	1	2	0	0	1	0	0	4	0	0	1	0	2	3	1	0	1	1	1	0	0	3	1	0
0	2	0	1	2	2	0	0	0	0	5	0	1	1	0	0	0	0	0	3	0	0	0	0	0	1	1	2	0	0	3	0	0	4	1	0	0	0	2	2	1	0	1	1	1	2	0	3	3	0
2	0	2	1	0	2	0	0	0	0	5	0	1	3	0	1	0	2	1	3	0	1	0	0	0	0	0	0	1	0	1	0	0	4	0	0	0	1	2	3	2	0	1	1	1	2	2	1	2	2
1	0	0	1	0	3	0	0	0	0	5	3	1	1	0	0	2	1	1	1	0	2	0	0	0	0	1	0	0	0	3	0	0	3	1	0	0	0	2	2	1	0	1	0	3	0	0	3	1	0
1	2	0	1	2	2	0	0	0	0	5	1	1	1	0	0	0	0	0	3	0	0	0	0	0	1	1	2	0	0	3	0	0	4	2	0	0	0	2	2	0	0	1	0	1	2	0	3	3	0
0	0	0	1	0	2	0	0	0	0	4	0	1	0	0	0	0	2	1	1	0	0	0	0	0	0	1	0	0	0	0	0	0	3	0	0	0	2	3	2	3	0	1	2	1	0	0	3	0	0
2	0	0	1	0	2	0	0	0	0	3	0	1	1	0	0	0	2	1	1	0	0	1	0	0	0	0	0	1	0	1	2	0	4	1	0	0	1	2	2	1	0	1	0	1	0	0	1	0	0
2	0	0	1	0	2	0	0	0	0	3	0	1	0	0	0	0	2	1	1	0	0	1	0	0	0	1	0	0	0	0	2	0	4	1	0	0	0	2	2	1	0	1	1	1	0	0	1	0	0
0	0	0	1	0	4	0	0	0	0	4	2	1	0	0	0	2	2	1	1	0	2	1	0	0	2	1	0	0	0	2	0	0	1	0	0	1	0	0	2	1	0	1	2	3	0	0	4	0	1
0	0	0	1	0	4	1	0	0	0	3	2	1	0	0	0	2	2	0	1	0	0	0	1	0	2	1	0	0	0	2	0	0	1	0	0	1	0	1	2	1	0	1	2	1	2	0	3	1	0
0	1	0	1	0	3	1	0	1	1	4	1	3	1	0	0	0	2	0	3	0	0	0	1	0	2	1	0	0	0	3	0	0	1	0	0	1	0	1	3	1	3	2	1	1	3	0	3	2	0
1	0	0	1	0	4	0	0	0	0	4	3	1	1	0	0	2	2	1	1	0	2	1	0	0	2	0	0	1	0	3	0	0	1	1	0	1	1	0	2	0	0	1	0	3	0	0	4	0	1
0	0	0	1	0	4	1	2	2	0	3	1	1	0	0	0	0	2	0	1	0	0	1	1	0	2	1	2	0	0	2	0	0	1	1	0	3	0	1	2	0	0	1	1	1	2	0	3	1	0
2	1	0	1	0	3	0	0	1	1	2	0	1	3	0	0	0	3	1	1	0	0	2	0	0	2	1	0	0	0	1	0	0	3	1	0	1	0	0	2	0	1	0	0	1	1	0	2	1	1
2	0	0	1	0	4	0	0	0	0	2	0	1	3	0	0	0	3	1	1	0	0	2	0	0	2	0	0	1	0	1	0	0	3	1	0	1	1	0	2	0	0	1	0	1	0	0	3	0	1
0	0	0	1	0	4	1	0	0	0	2	2	1	1	0	0	2	2	0	1	0	0	1	1	0	2	0	0	1	0	3	0	0	1	1	0	1	1	1	2	0	0	1	0	1	2	0	3	1	0
1	0	0	1	0	3	0	0	0	0	4	2	1	1	0	0	2	0	1	2	0	2	0	0	0	0	1	0	0	0	3	0	0	2	0	0	0	0	0	2	1	0	2	1	3	0	0	3	1	0
3	2	0	1	0	4	0	0	0	0	4	1	1	0	0	0	0	1	0	1	0	0	0	0	0	1	1	2	0	0	0	0	0	3	1	0	0	0	0	3	0	0	3	1	1	0	0	4	0	0
1	0	1	1	0	4	0	1	0	0	4	1	1	1	0	0	0	2	0	1	0	0	0	0	0	0	0	0	2	0	1	0	0	1	1	0	0	3	2	2	0	0	3	0	1	0	0	4	0	0
3	0	2	1	0	4	0	0	0	0	4	1	1	2	0	1	0	1	1	3	0	1	0	0	0	0	1	0	0	0	0	0	0	3	1	0	0	0	0	3	0	0	3	1	1	2	2	3	2	2
0	2	0	1	2	4	0	0	0	0	3	0	1	1	0	0	0	0	1	3	0	0	1	0	0	1	1	2	0	0	3	0	0	3	2	0	0	0	0	2	0	0	3	0	1	2	0	4	3	0
1	0	2	1	2	3	0	0	0	0	3	1	1	1	0	0	0	0	0	1	0	0	0	1	0	0	1	0	0	0	3	0	0	2	0	0	0	0	0	2	1	0	2	1	1	2	0	2	1	0
2	2	0	1	0	4	0	0	2	0	4	0	1	1	0	0	2	0	0	3	0	0	0	0	0	0	0	0	1	0	1	0	0	3	0	0	0	2	2	3	1	0	4	2	1	0	0	4	0	0
1	0	2	1	2	4	0	0	0	0	3	2	1	1	0	0	0	0	0	1	0	0	0	1	0	0	1	0	0	0	3	0	0	1	1	0	0	0	0	2	0	0	3	0	1	2	0	3	1	0
3	2	0	1	0	4	0	0	2	0	4	1	1	1	0	0	2	0	0	3	0	0	0	0	0	0	0	0	1	0	1	0	0	3	1	0	0	2	2	3	0	0	4	1	1	0	0	4	0	0
1	1	0	1	2	3	0	0	1	1	3	2	1	1	0	0	0	0	0	1	0	0	0	1	0	0	1	0	0	0	3	0	0	1	1	0	0	0	0	3	0	1	2	0	1	3	0	2	1	0
3	2	0	1	1	4	0	0	0	0	3	1	1	2	0	0	0	0	1	1	0	0	0	1	0	1	1	2	0	0	0	0	0	3	1	0	0	0	0	2	0	0	3	1	1	0	0	3	0	0
1	0	2	1	2	3	0	0	0	0	2	1	1	1	0	0	0	0	0	1	0	0	1	1	0	0	1	0	0	0	3	0	0	2	1	0	0	0	0	2	0	0	2	0	1	2	0	2	1	0
0	0	1	1	0	2	0	1	0	0	3	0	1	1	0	0	0	2	0	1	0	0	1	0	0	0	1	0	1	0	1	0	0	3	1	0	0	2	3	2	0	0	1	0	1	0	0	3	1	0
2	0	2	1	0	2	0	0	0	0	4	0	1	3	0	1	0	2	1	3	0	1	1	0	0	0	0	0	1	0	1	0	0	4	1	0	0	1	2	3	1	0	1	0	1	2	2	1	2	2
1	0	0	1	0	3	0	0	0	0	4	1	1	3	0	0	0	2	1	1	0	0	0	0	0	0	0	0	1	0	1	0	0	3	1	0	0	1	2	2	1	0	1	0	1	0	0	1	0	0
1	1	0	1	0	2	0	0	1	1	4	1	1	1	0	0	0	1	1	1	0	0	0	0	0	0	1	0	0	0	1	0	0	4	1	0	0	0	2	2	1	1	0	0	1	1	0	2	1	0
2	0	0	1	0	1	0	0	0	0	4	1	1	1	0	0	0	2	1	1	0	0	0	0	0	0	1	0	0	0	1	0	0	4	1	0	0	2	3	2	2	0	0	0	1	0	0	2	1	0
2	1	0	1	0	1	0	0	1	1	3	0	1	3	0	0	0	2	1	1	0	0	1	0	0	0	1	0	0	0	1	0	0	4	1	0	0	0	2	2	1	1	0	0	1	1	0	0	1	0
2	1	0	1	0	3	0	0	1	1	3	0	1	3	0	0	0	3	1	1	0	0	1	0	0	2	1	0	0	0	1	0	0	3	0	0	1	0	0	2	1	1	0	1	1	1	0	2	1	1
0	0	0	1	2	4	1	0	0	0	3	1	1	1	0	0	0	2	0	1	0	0	0	1	0	2	0	0	1	0	3	0	0	1	0	0	1	1	1	3	1	0	1	1	1	2	0	3	1	0
1	0	0	1	0	4	0	0	0	0	3	1	1	1	0	0	0	2	1	1	0	0	1	0	0	2	0	0	1	0	1	0	0	3	1	0	1	1	0	2	0	0	1	0	1	0	0	4	0	1
2	0	0	1	0	4	0	0	0	0	4	1	1	1	0	0	0	0	0	1	0	0	0	1	0	0	1	0	0	0	3	2	2	3	0	0	0	0	0	3	1	0	3	1	1	2	0	3	1	0
1	2	0	1	2	4	0	0	0	0	4	1	1	1	0	0	0	0	1	3	0	0	0	0	0	1	1	2	0	0	3	0	0	3	2	0	0	0	0	2	0	0	3	0	1	2	0	4	3	0
3	1	2	1	0	3	0	0	1	1	4	1	1	3	0	1	0	1	1	3	0	1	0	0	0	0	1	0	0	0	1	0	0	3	1	0	0	0	0	3	0	1	2	0	1	3	2	2	3	2
0	0	0	1	0	3	0	0	0	0	5	2	1	1	0	0	2	1	1	1	0	2	0	0	0	0	1	0	0	0	3	0	0	3	0	0	0	0	2	2	2	0	1	1	3	0	0	3	1	0
2	0	2	1	0	2	0	0	0	0	4	0	1	3	0	1	0	2	1	3	0	1	1	0	0	0	1	0	0	0	1	0	0	4	1	0	0	0	2	3	1	0	1	0	1	2	2	1	3	2
0	0	0	1	0	3	0	0	0	0	4	0	1	2	0	0	0	2	1	1	0	0	0	0	0	0	1	0	0	0	0	0	0	3	0	0	0	0	2	2	2	0	1	2	1	0	0	1	0	0
3	0	0	1	0	2	0	0	0	0	4	1	1	2	0	0	0	2	1	1	0	0	0	0	0	0	1	0	0	0	0	0	0	4	1	0	0	0	2	2	1	0	1	1	1	0	0	1	0	0
0	0	0	1	0	3	0	0	0	0	3	0	1	0	0	0	0	1	1	1	0	0	1	0	0	0	1	0	0	0	0	0	0	4	1	0	0	0	2	2	1	0	1	1	1	0	0	3	0	0
0	0	0	1	0	4	0	0	0	0	3	0	1	1	0	0	0	2	1	1	0	0	1	0	0	2	0	0	1	0	1	0	0	3	0	0	1	1	0	2	1	0	1	1	1	0	0	4	0	1
0	1	0	1	2	3	1	0	1	1	3	1	1	1	0	0	0	2	0	1	0	0	0	1	0	2	1	0	0	0	3	0	0	1	0	0	1	0	1	3	1	1	0	1	1	3	0	2	2	0
2	2	1	1	1	4	1	0	0	0	3	0	1	2	0	0	0	2	0	1	0	0	0	1	0	3	1	2	0	0	0	0	0	3	0	0	1	0	0	2	1	0	1	2	1	0	0	3	0	0
1	1	1	1	0	3	0	1	1	1	3	1	1	1	0	0	0	3	0	1	0	0	1	0	0	2	1	0	1	0	1	0	0	1	1	0	1	2	2	2	0	1	0	0	1	1	0	3	1	0
4	2	1	1	1	3	1	0	0	0	3	1	1	3	0	0	0	2	0	1	0	0	0	1	0	3	1	2	0	0	1	0	0	4	1	0	1	0	0	2	0	0	0	0	1	0	0	2	1	0
0	0	1	1	0	4	0	1	0	0	4	0	1	0	0	0	0	2	0	1	0	0	0	0	0	0	1	0	1	0	0	0	0	1	0	0	0	2	2	2	1	0	3	2	1	0	0	4	0	0
3	0	2	1	0	3	0	0	0	0	4	0	1	3	0	1	0	1	1	3	0	1	0	0	0	0	1	0	0	0	1	0	0	4	0	0	0	0	0	3	1	0	2	1	1	2	2	2	3	2
0	1	0	1	0	3	0	0	1	1	3	2	1	1	0	0	2	0	1	2	0	2	1	0	0	0	1	0	0	0	3	0	0	1	1	0	0	0	0	2	0	1	2	0	3	1	0	3	1	0
0	0	0	1	0	4	0	0	0	0	3	2	1	1	0	0	2	0	1	2	0	2	1	0	0	0	0	0	1	0	3	0	0	1	1	0	0	1	0	2	0	0	3	0	3	0	0	4	0	0
2	2	0	1	0	4	0	0	2	0	3	0	1	0	0	0	2	0	0	3	0	0	1	0	0	0	1	0	0	0	0	0	0	3	1	0	0	1	2	3	0	0	4	2	1	0	0	4	0	0
2	0	0	1	0	2	0	0	0	0	5	1	1	1	0	0	0	0	0	1	0	0	0	1	0	0	1	0	0	0	3	2	2	4	0	0	0	0	2	3	1	0	1	1	1	2	0	1	1	0
0	0	0	1	0	3	0	0	0	0	5	2	1	1	0	0	2	1	1	1	0	2	0	0	0	0	0	0	1	0	3	0	0	3	0	0	0	1	2	2	2	0	1	1	3	0	0	3	0	0
0	0	0	1	0	3	0	0	0	0	5	2	1	0	0	0	2	1	1	1	0	2	0	0	0	0	1	0	0	0	2	0	0	3	0	0	0	0	2	2	2	0	1	2	3	0	0	3	0	0
3	0	0	1	0	2	0	0	0	0	5	2	1	1	0	0	0	0	0	1	0	0	0	1	0	0	0	0	1	0	3	2	2	4	1	0	0	1	2	3	0	0	1	0	1	2	0	1	0	0
3	0	0	1	0	2	0	0	0	0	5	2	1	0	0	0	0	0	0	1	0	0	0	1	0	0	1	0	0	0	2	2	2	4	1	0	0	0	2	3	0	0	1	1	1	2	0	1	0	0
0	2	0	1	2	2	0	0	0	0	4	0	1	0	0	0	0	0	0	3	0	0	1	0	0	1	1	2	0	0	2	0	0	4	2	0	0	0	2	2	0	0	1	1	1	2	0	3	2	0
0	1	0	1	0	2	0	0	1	1	4	0	1	1	0	0	0	1	1	1	0	0	0	0	0	0	1	0	0	0	1	0	0	4	0	0	0	0	2	2	2	1	0	1	1	1	0	2	1	0
1	0	0	1	0	3	0	0	0	0	4	1	1	3	0	0	0	2	1	1	0	0	0	0	0	0	1	0	0	0	1	0	0	3	1	0	0	0	2	2	1	0	1	0	1	0	0	1	1	0
2	0	0	1	0	2	0	0	0	0	4	1	1	3	0	0	0	2	1	1	0	0	0	0	0	0	1	0	0	0	1	0	0	4	1	0	0	0	2	2	1	0	0	0	1	0	0	0	1	0
3	0	0	1	0	1	0	0	0	0	3	0	1	1	0	0	0	2	1	1	0	0	1	0	0	0	1	0	0	0	1	2	0	5	1	0	0	0	2	2	1	0	0	0	1	0	0	0	1	0
0	1	1	1	0	3	0	1	1	1	3	0	1	1	0	0	0	3	0	1	0	0	1	0	0	2	1	0	1	0	1	0	0	1	0	0	1	2	2	2	1	1	0	1	1	1	0	3	1	0
0	0	0	1	0	4	0	0	0	0	4	2	1	1	0	0	2	2	1	1	0	2	1	0	0	2	1	0	0	0	3	0	0	1	0	0	1	0	0	2	1	0	1	1	3	0	0	4	1	1
0	1	1	1	2	3	0	0	1	1	4	1	1	1	0	0	0	2	0	2	0	0	0	1	0	2	1	0	0	0	3	0	0	1	0	0	3	0	0	2	2	1	0	1	3	1	0	3	2	0
3	0	0	1	0	4	0	0	0	0	3	1	1	2	0	0	0	3	1	1	0	0	1	0	0	2	1	0	0	0	0	0	0	3	1	0	1	0	0	2	0	0	1	1	1	0	0	3	0	1
1	1	0	1	0	3	1	0	1	1	3	3	1	1	0	0	2	2	0	1	0	0	0	1	0	2	1	0	0	0	3	0	0	1	1	0	1	0	1	2	0	1	0	0	1	3	0	2	2	0
2	0	0	1	2	3	1	0	0	0	3	2	1	1	0	0	0	2	0	1	0	0	0	1	0	2	1	0	0	0	3	0	0	2	1	0	1	0	1	3	0	0	0	0	1	2	0	2	2	0
1	0	0	1	2	4	1	0	0	0	3	2	1	0	0	0	0	2	0	1	0	0	0	1	0	2	1	0	0	0	2	0	0	1	1	0	1	0	1	3	0	0	1	1	1	2	0	3	1	0
1	0	1	1	0	3	0	1	0	0	2	0	1	1	0	0	0	3	0	1	0	0	2	0	0	2	1	0	1	0	1	0	0	2	1	0	1	2	2	2	0	0	0	0	1	0	0	3	1	0
2	2	0	1	0	4	0	0	2	0	3	0	1	1	0	0	2	2	0	3	0	0	2	0	0	2	1	0	0	0	1	0	0	3	1	0	1	1	2	3	1	0	3	1	1	0	0	4	1	0
0	1	1	1	0	3	0	1	1	1	4	0	1	1	0	0	0	2	0	1	0	0	0	0	0	0	1	0	1	0	1	0	0	1	0	0	0	2	2	2	1	1	2	1	1	1	0	3	1	0
2	0	2	1	0	4	0	0	0	0	3	0	1	2	0	1	0	1	1	3	0	1	1	0	0	0	1	0	0	0	0	0	0	3	1	0	0	0	0	3	0	0	3	1	1	2	2	3	2	2
0	0	0	1	2	4	0	0	0	0	2	1	1	1	0	0	0	0	0	1	0	0	1	1	0	0	0	0	1	0	3	0	0	1	1	0	0	1	0	3	0	0	3	0	1	2	0	3	0	0
3	2	0	1	0	1	0	0	0	0	5	0	1	1	0	0	0	1	0	1	0	0	0	0	0	1	1	2	0	0	1	0	0	5	0	0	1	0	2	3	1	0	0	1	1	0	0	2	1	0
0	0	1	1	0	2	0	1	0	0	4	0	1	1	0	0	0	2	0	1	0	0	0	0	0	0	1	0	1	0	1	0	0	3	0	0	0	2	3	2	1	0	1	1	1	0	0	3	1	0
0	2	0	1	2	2	0	0	0	0	5	0	1	0	0	0	0	0	0	3	0	0	0	0	0	1	1	2	0	0	2	0	0	4	1	0	0	0	2	2	1	0	1	2	1	2	0	3	2	0
3	1	2	1	0	1	0	0	1	1	5	1	1	3	0	1	0	2	1	3	0	1	0	0	0	0	1	0	0	0	1	0	0	4	1	0	0	0	2	3	1	1	0	0	1	3	2	0	3	2
1	0	0	1	0	2	0	0	0	0	4	0	1	3	0	0	0	2	1	1	0	0	0	0	0	0	1	0	0	0	1	0	0	4	0	0	0	0	2	2	2	0	0	1	1	0	0	0	1	0
3	0	0	1	0	2	0	0	0	0	4	1	1	3	0	0	0	2	1	1	0	0	0	0	0	0	1	0	0	0	1	0	0	4	1	0	0	0	2	2	1	0	1	0	1	0	0	1	1	0
0	0	0	1	0	3	0	0	0	0	3	0	1	1	0	0	0	1	1	1	0	0	1	0	0	0	0	0	1	0	1	0	0	4	1	0	0	1	2	2	1	0	1	0	1	0	0	3	0	0
0	1	0	1	0	3	0	0	1	1	3	0	1	3	0	0	0	3	1	1	0	0	1	0	0	2	1	0	0	0	1	0	0	1	0	0	1	0	0	2	1	1	0	1	1	1	0	2	1	1
2	0	0	1	0	4	0	0	0	0	3	0	1	2	0	0	0	3	1	1	0	0	1	0	0	2	1	0	0	0	0	0	0	3	0	0	1	0	0	2	1	0	1	2	1	0	0	3	0	1
0	0	0	1	0	4	1	0	0	0	4	1	3	0	0	0	0	2	0	3	0	0	0	1	0	2	1	0	0	0	2	0	0	1	0	0	1	0	1	3	1	2	3	2	1	2	0	4	1	0
2	2	0	1	0	4	0	0	2	0	4	0	1	1	0	0	2	2	0	3	0	0	1	0	0	2	1	0	0	0	1	0	0	3	0	0	1	1	2	3	2	0	3	2	1	0	0	4	1	0
3	0	0	1	0	4	1	0	0	0	4	2	1	1	0	0	0	2	0	1	0	0	0	1	0	2	1	0	0	0	3	2	2	3	1	0	1	0	1	3	0	0	1	0	1	2	0	3	2	0
1	0	1	1	0	4	0	1	0	0	3	1	1	0	0	0	0	2	0	1	0	2	1	0	0	2	1	0	1	0	0	0	0	1	1	0	1	0	0	2	0	0	3	1	1	0	0	4	0	0
1	0	0	1	0	4	0	0	0	0	3	1	1	2	0	0	0	3	1	1	0	0	1	0	0	2	1	0	0	0	0	0	0	1	1	0	1	0	0	2	0	0	1	1	1	0	0	3	0	1
1	1	0	1	0	3	1	0	1	1	4	2	3	1	0	0	0	2	0	3	0	0	0	1	0	2	1	0	0	0	3	0	0	1	1	0	1	0	1	3	0	3	2	0	1	3	0	3	2	0
1	0	1	1	2	4	0	0	0	0	4	2	1	1	0	0	0	2	0	2	0	0	0	1	0	2	0	0	1	0	3	0	0	1	1	0	3	1	0	2	1	0	1	0	3	0	0	4	1	0
0	0	0	1	0	4	0	0	0	0	3	2	1	1	0	0	2	2	1	1	0	2	2	0	0	2	1	0	0	0	3	0	0	1	1	0	1	0	0	2	0	0	1	0	3	0	0	4	1	1
2	0	0	1	0	4	0	0	0	0	2	0	1	1	0	0	0	3	1	1	0	0	2	0	0	2	1	0	0	0	1	2	0	3	1	0	1	0	0	2	0	0	1	0	1	0	0	3	1	1
0	1	0	1	0	3	1	0	1	1	2	2	1	1	0	0	2	2	0	1	0	0	1	1	0	2	1	0	0	0	3	0	0	1	1	0	1	0	1	2	0	1	0	0	1	3	0	2	2	0
1	0	0	1	0	3	1	0	0	0	3	1	3	1	0	0	0	2	0	3	0	0	1	1	0	2	1	0	0	0	3	0	0	2	1	0	1	0	1	3	0	2	2	0	1	2	0	3	2	0
0	0	0	1	2	4	1	0	0	0	2	1	1	0	0	0	0	2	0	1	0	0	1	1	0	2	1	0	0	0	2	0	0	1	1	0	1	0	1	3	0	0	1	1	1	2	0	3	1	0
0	2	0	1	2	4	0	0	0	0	4	0	1	1	0	0	0	0	1	3	0	0	0	0	0	1	0	2	1	0	3	0	0	3	1	0	0	1	0	2	1	0	3	1	1	2	0	4	2	0
4	2	0	1	0	3	0	0	0	0	4	1	1	1	0	0	0	1	0	1	0	0	0	0	0	1	1	2	0	0	1	0	0	4	1	0	0	0	0	3	0	0	2	0	1	0	0	3	1	0
2	0	0	1	0	4	0	0	0	0	3	1	1	0	0	0	0	0	0	1	0	0	1	1	0	0	1	0	0	0	2	2	2	3	1	0	0	0	0	3	0	0	3	1	1	2	0	3	0	0
2	2	0	1	1	4	0	0	0	0	3	0	1	3	0	0	0	0	1	1	0	0	0	1	0	1	1	2	0	0	1	0	0	3	0	0	0	0	0	2	1	0	3	1	1	0	0	3	1	0
2	0	0	1	0	3	0	0	0	0	4	2	3	1	0	0	0	0	0	3	0	0	0	1	0	0	1	0	0	0	3	0	0	2	1	0	0	0	0	3	0	2	3	0	1	2	0	3	1	0
1	0	0	1	2	4	0	0	0	0	3	2	1	0	0	0	0	0	0	1	0	0	0	1	0	0	1	0	0	0	2	0	0	1	1	0	0	0	0	3	0	0	3	1	1	2	0	3	0	0
1	2	0	1	2	2	0	0	0	0	5	1	1	1	0	0	0	0	0	3	0	0	0	0	0	1	0	2	1	0	3	0	0	4	2	0	0	1	2	2	0	0	1	0	1	2	0	3	2	0
3	2	0	1	0	1	0	0	0	0	4	0	1	1	0	0	0	1	0	1	0	0	1	0	0	1	1	2	0	0	1	0	0	5	1	0	1	0	2	3	0	0	0	0	1	0	0	2	1	0
2	0	0	1	0	2	0	0	0	0	4	0	1	0	0	0	0	2	1	1	0	0	0	0	0	0	1	0	0	0	0	2	0	4	0	0	0	0	2	2	2	0	1	2	1	0	0	1	0	0
1	0	0	1	0	2	0	0	0	0	4	1	1	1	0	0	0	2	1	1	0	0	0	0	0	0	1	0	0	0	1	0	0	3	1	0	0	2	3	2	2	0	1	0	1	0	0	3	1	0
2	2	1	1	1	4	1	0	0	0	3	0	1	3	0	0	0	2	0	1	0	0	0	1	0	3	1	2	0	0	1	0	0	3	0	0	1	0	0	2	1	0	1	1	1	0	0	3	1	0
4	0	2	1	0	3	0	0	0	0	4	1	1	3	0	1	0	3	1	3	0	0	1	0	0	2	1	0	0	0	1	0	0	4	1	0	1	0	0	3	0	0	0	0	1	2	2	2	3	2
1	1	0	1	0	3	0	0	1	1	3	1	1	3	0	0	0	3	1	1	0	0	1	0	0	2	1	0	0	0	1	0	0	1	1	0	1	0	0	2	0	1	0	0	1	1	0	2	1	1
3	0	0	1	0	4	0	0	0	0	3	1	1	3	0	0	0	3	1	1	0	0	1	0	0	2	1	0	0	0	1	0	0	3	1	0	1	0	0	2	0	0	1	0	1	0	0	3	1	1
1	0	0	1	0	4	1	0	0	0	4	2	3	1	0	0	0	2	0	3	0	0	0	1	0	2	0	0	1	0	3	0	0	1	1	0	1	1	1	3	0	2	3	0	1	2	0	4	1	0
0	1	1	1	0	3	0	1	1	1	2	0	1	1	0	0	0	2	0	1	0	2	2	0	0	2	1	0	1	0	1	0	0	1	1	0	1	0	0	2	0	1	2	0	1	1	0	3	1	0
0	0	0	1	0	4	0	0	0	0	2	0	1	3	0	0	0	3	1	1	0	0	2	0	0	2	1	0	0	0	1	0	0	1	1	0	1	0	0	2	0	0	1	0	1	0	0	3	1	1
3	2	1	1	1	3	1	0	0	0	2	0	1	3	0	0	0	2	0	1	0	0	1	1	0	3	1	2	0	0	1	0	0	4	1	0	1	0	0	2	0	0	0	0	1	0	0	2	1	0
0	0	1	1	0	4	0	1	0	0	4	0	1	1	0	0	0	2	0	1	0	0	0	0	0	0	0	0	2	0	1	0	0	1	0	0	0	3	2	2	1	0	3	1	1	0	0	4	0	0
2	0	0	1	0	4	0	0	0	0	4	1	1	0	0	0	0	0	0	1	0	0	0	1	0	0	1	0	0	0	2	2	2	3	0	0	0	0	0	3	1	0	3	2	1	2	0	3	0	0
3	0	0	1	0	4	0	0	0	0	4	2	1	0	0	0	0	0	0	1	0	0	0	1	0	0	1	0	0	0	2	2	2	3	1	0	0	0	0	3	0	0	3	1	1	2	0	3	0	0
2	2	0	1	0	4	0	0	0	0	3	0	1	1	0	0	0	1	0	1	0	0	1	0	0	1	0	2	1	0	1	0	0	3	1	0	0	1	0	3	0	0	3	0	1	0	0	4	0	0
3	3	0	1	0	3	0	0	3	1	4	1	1	1	0	0	2	0	0	3	0	0	0	0	0	0	1	0	0	0	1	0	0	3	1	0	0	1	2	3	0	1	3	1	1	1	0	3	1	0
4	2	0	1	1	3	0	0	0	0	3	1	1	3	0	0	0	0	1	1	0	0	0	1	0	1	1	2	0	0	1	0	0	4	1	0	0	0	0	2	0	0	2	0	1	0	0	2	1	0
0	0	0	1	2	4	0	0	0	0	2	1	1	0	0	0	0	0	0	1	0	0	1	1	0	0	1	0	0	0	2	0	0	1	1	0	0	0	0	3	0	0	3	1	1	2	0	3	0	0
1	0	0	1	0	3	0	0	0	0	5	3	1	0	0	0	2	1	1	1	0	2	0	0	0	0	1	0	0	0	2	0	0	3	1	0	0	0	2	2	1	0	1	1	3	0	0	3	0	0
2	0	0	1	0	2	0	0	0	0	4	1	1	1	0	0	0	0	0	1	0	0	1	1	0	0	1	0	0	0	3	2	2	4	1	0	0	0	2	3	0	0	1	0	1	2	0	1	1	0
2	1	0	1	0	1	0	0	1	1	4	1	1	1	0	0	0	0	0	1	0	0	1	1	0	0	1	0	0	0	3	2	2	4	1	0	0	0	2	3	0	1	0	0	1	3	0	0	1	0
0	0	0	1	0	3	0	0	0	0	4	0	1	1	0	0	0	1	1	1	0	0	0	0	0	0	1	0	0	0	1	0	0	4	0	0	0	0	2	2	2	0	1	1	1	0	0	3	1	0
0	0	0	1	0	3	0	0	0	0	4	0	1	0	0	0	0	1	1	1	0	0	0	0	0	0	1	0	0	0	0	0	0	4	0	0	0	0	2	2	2	0	1	2	1	0	0	3	0	0
0	0	0	1	0	3	0	0	0	0	3	0	1	2	0	0	0	2	1	1	0	0	1	0	0	0	1	0	0	0	0	0	0	3	1	0	0	0	2	2	1	0	1	1	1	0	0	1	0	0
2	0	0	1	0	2	0	0	0	0	3	0	1	3	0	0	0	2	1	1	0	0	1	0	0	0	1	0	0	0	1	0	0	4	1	0	0	0	2	2	1	0	1	0	1	0	0	1	1	0
0	0	0	1	0	4	0	0	0	0	3	0	1	3	0	0	0	3	1	1	0	0	1	0	0	2	1	0	0	0	1	0	0	1	0	0	1	0	0	2	1	0	1	1	1	0	0	3	1	1
2	0	0	1	0	4	0	0	0	0	3	0	1	3	0	0	0	3	1	1	0	0	1	0	0	2	0	0	1	0	1	0	0	3	0	0	1	1	0	2	1	0	1	1	1	0	0	3	0	1
3	0	0	1	0	4	1	0	0	0	4	2	1	1	0	0	0	2	0	1	0	0	0	1	0	2	0	0	1	0	3	2	2	3	1	0	1	1	1	3	0	0	1	0	1	2	0	3	1	0
1	0	0	1	0	4	1	2	2	0	4	2	1	1	0	0	0	2	0	1	0	0	0	1	0	2	0	2	1	0	3	0	0	1	1	0	3	1	1	2	0	0	1	0	1	2	0	3	1	0
2	0	0	1	0	3	0	0	0	0	3	1	1	3	0	0	0	3	1	1	0	0	1	0	0	2	1	0	0	0	1	0	0	2	1	0	1	0	0	2	0	0	0	0	1	0	0	2	1	1
3	2	1	1	1	4	1	0	0	0	3	1	1	3	0	0	0	2	0	1	0	0	0	1	0	3	0	2	1	0	1	0	0	3	1	0	1	1	0	2	0	0	1	0	1	0	0	3	0	0
2	0	2	1	0	4	0	0	0	0	3	0	1	2	0	1	0	3	1	3	0	0	2	0	0	2	1	0	0	0	0	0	0	3	1	0	1	0	0	3	0	0	1	1	1	2	2	3	2	2
2	2	1	1	1	4	1	0	0	0	2	0	1	3	0	0	0	2	0	1	0	0	1	1	0	3	1	2	0	0	1	0	0	3	1	0	1	0	0	2	0	0	1	0	1	0	0	3	1	0
2	2	1	1	1	4	1	0	0	0	2	0	1	3	0	0	0	2	0	1	0	0	1	1	0	3	0	2	1	0	1	0	0	3	1	0	1	1	0	2	0	0	1	0	1	0	0	3	0	0
3	2	0	1	0	3	0	0	0	0	3	0	1	1	0	0	0	1	0	1	0	0	1	0	0	1	1	2	0	0	1	0	0	4	1	0	0	0	0	3	0	0	2	0	1	0	0	3	1	0
0	0	0	1	2	4	0	0	0	0	3	1	1	1	0	0	0	0	0	1	0	0	0	1	0	0	1	0	0	0	3	0	0	1	0	0	0	0	0	3	1	0	3	1	1	2	0	3	1	0
2	2	0	1	0	4	0	0	2	0	3	0	1	1	0	0	2	0	0	3	0	0	1	0	0	0	1	0	0	0	1	0	0	3	1	0	0	1	2	3	0	0	4	1	1	0	0	4	1	0
4	0	2	1	0	1	0	0	0	0	5	1	1	3	0	1	0	2	1	3	0	1	0	0	0	0	1	0	0	0	1	0	0	5	1	0	0	0	2	3	1	0	0	0	1	2	2	0	3	2
1	0	0	1	0	2	0	0	0	0	4	2	1	1	0	0	2	1	1	1	0	2	1	0	0	0	1	0	0	0	3	0	0	4	1	0	0	0	2	2	1	0	0	0	3	0	0	2	1	0
2	0	0	1	0	2	0	0	0	0	4	0	1	2	0	0	0	2	1	1	0	0	0	0	0	0	1	0	0	0	0	0	0	4	0	0	0	0	2	2	2	0	1	2	1	0	0	1	0	0
2	0	0	1	0	2	0	0	0	0	4	1	1	1	0	0	0	1	1	1	0	0	0	0	0	0	1	0	0	0	1	0	0	5	1	0	0	0	2	2	1	0	0	0	1	0	0	2	1	0
1	1	0	1	0	1	0	0	1	1	4	1	1	1	0	0	0	2	1	1	0	0	0	0	0	0	1	0	0	0	1	0	0	3	1	0	0	2	3	2	2	1	0	0	1	1	0	2	1	0
1	0	0	1	0	2	0	0	0	0	4	1	1	0	0	0	0	2	1	1	0	0	0	0	0	0	1	0	0	0	0	0	0	3	1	0	0	2	3	2	2	0	1	1	1	0	0	3	0	0
0	0	0	1	0	3	0	0	0	0	3	0	1	3	0	0	0	2	1	1	0	0	1	0	0	0	1	0	0	0	1	0	0	3	1	0	0	0	2	2	1	0	1	0	1	0	0	1	1	0
0	1	0	1	0	1	0	0	1	1	3	0	1	1	0	0	0	2	1	1	0	0	1	0	0	0	1	0	0	0	1	0	0	3	1	0	0	2	3	2	2	1	0	0	1	1	0	2	1	0
0	0	0	1	0	2	0	0	0	0	3	0	1	0	0	0	0	2	1	1	0	0	1	0	0	0	1	0	0	0	0	0	0	3	1	0	0	2	3	2	2	0	1	1	1	0	0	3	0	0
2	1	2	1	0	3	0	0	1	1	4	0	1	3	0	1	0	3	1	3	0	0	1	0	0	2	1	0	0	0	1	0	0	3	0	0	1	0	0	3	1	1	0	1	1	3	2	2	3	2
2	0	0	1	0	4	0	0	0	0	3	0	1	3	0	0	0	3	1	1	0	0	1	0	0	2	1	0	0	0	1	0	0	3	0	0	1	0	0	2	1	0	1	1	1	0	0	3	1	1
0	1	0	1	0	3	0	0	1	1	3	0	1	1	0	0	0	2	1	1	0	0	1	0	0	2	1	0	0	0	1	0	0	3	0	0	1	0	0	2	1	1	0	1	1	1	0	3	1	1
1	0	1	1	0	4	0	1	0	0	3	1	1	1	0	0	0	3	0	1	0	0	1	0	0	2	0	0	2	0	1	0	0	1	1	0	1	3	2	2	0	0	1	0	1	0	0	4	0	0
3	2	0	1	0	4	0	0	2	0	4	1	1	1	0	0	2	2	0	3	0	0	1	0	0	2	1	0	0	0	1	0	0	3	1	0	1	1	2	3	1	0	3	1	1	0	0	4	1	0
0	1	0	1	0	3	1	2	3	1	3	1	1	1	0	0	0	2	0	1	0	0	1	1	0	2	1	2	0	0	3	0	0	1	1	0	3	0	1	2	0	1	0	0	1	3	0	2	2	0
0	2	1	1	2	4	1	0	0	0	3	0	1	0	0	0	0	2	0	3	0	0	1	0	0	3	1	2	0	0	2	0	0	3	2	0	1	0	0	2	0	0	1	1	1	2	0	4	2	0
2	2	0	1	0	4	0	0	0	0	4	0	1	1	0	0	0	1	0	1	0	0	0	0	0	1	0	2	1	0	1	0	0	3	0	0	0	1	0	3	1	0	3	1	1	0	0	4	0	0
2	0	2	1	0	4	0	0	0	0	4	0	1	2	0	1	0	1	1	3	0	1	0	0	0	0	1	0	0	0	0	0	0	3	0	0	0	0	0	3	1	0	3	2	1	2	2	3	2	2
3	0	2	1	0	4	0	0	0	0	4	1	1	3	0	1	0	1	1	3	0	1	0	0	0	0	1	0	0	0	1	0	0	3	1	0	0	0	0	3	0	0	3	0	1	2	2	3	3	2
3	0	0	1	0	3	0	0	0	0	3	1	1	1	0	0	0	0	0	1	0	0	1	1	0	0	1	0	0	0	3	2	2	4	1	0	0	0	0	3	0	0	2	0	1	2	0	2	1	0
2	3	0	1	0	3	0	0	3	1	4	0	1	1	0	0	2	0	0	3	0	0	0	0	0	0	1	0	0	0	1	0	0	3	0	0	0	1	2	3	1	1	3	2	1	1	0	3	1	0
0	0	0	1	0	4	0	0	0	0	3	1	3	1	0	0	0	0	0	3	0	0	1	1	0	0	0	0	1	0	3	0	0	1	1	0	0	1	0	3	0	2	4	0	1	2	0	4	0	0
0	0	0	1	0	4	0	0	0	0	3	1	3	0	0	0	0	0	0	3	0	0	1	1	0	0	1	0	0	0	2	0	0	1	1	0	0	0	0	3	0	2	4	1	1	2	0	4	0	0
3	2	0	1	1	3	0	0	0	0	2	0	1	3	0	0	0	0	1	1	0	0	1	1	0	1	1	2	0	0	1	0	0	4	1	0	0	0	0	2	0	0	2	0	1	0	0	2	1	0
3	2	0	1	0	2	0	0	0	0	5	1	1	1	0	0	0	1	0	1	0	0	0	0	0	1	0	2	1	0	1	0	0	4	1	0	1	1	2	3	0	0	1	0	1	0	0	3	0	0
2	0	0	1	0	2	0	0	0	0	5	3	1	1	0	0	2	1	1	1	0	2	0	0	0	0	1	0	0	0	3	0	0	4	1	0	0	0	2	2	1	0	0	0	3	0	0	2	1	0
0	1	0	1	0	2	0	0	1	1	4	2	1	1	0	0	2	1	1	1	0	2	1	0	0	0	1	0	0	0	3	0	0	3	1	0	0	0	2	2	1	1	0	0	3	1	0	2	1	0
0	0	0	1	0	3	0	0	0	0	4	0	1	3	0	0	0	2	1	1	0	0	0	0	0	0	0	0	1	0	1	0	0	3	0	0	0	1	2	2	2	0	1	1	1	0	0	1	0	0
1	0	0	1	0	2	0	0	0	0	4	1	1	1	0	0	0	2	1	1	0	0	0	0	0	0	0	0	1	0	1	0	0	3	1	0	0	3	3	2	2	0	1	0	1	0	0	3	0	0
0	0	0	1	0	2	0	0	0	0	3	0	1	1	0	0	0	2	1	1	0	0	1	0	0	0	0	0	1	0	1	0	0	3	1	0	0	3	3	2	2	0	1	0	1	0	0	3	0	0
1	0	0	1	0	3	0	0	0	0	3	0	1	3	0	0	0	3	1	1	0	0	1	0	0	2	1	0	0	0	1	0	0	2	0	0	1	0	0	2	1	0	0	1	1	0	0	2	1	1
2	0	0	1	0	4	1	0	0	0	4	1	1	1	0	0	0	2	0	1	0	0	0	1	0	2	1	0	0	0	3	2	2	3	0	0	1	0	1	3	1	0	1	1	1	2	0	3	2	0
3	0	0	1	0	3	1	0	0	0	4	1	1	1	0	0	0	2	0	1	0	0	0	1	0	2	1	0	0	0	3	2	2	4	0	0	1	0	1	3	1	0	0	1	1	2	0	2	2	0
2	0	0	1	0	3	1	2	2	0	4	2	1	1	0	0	0	2	0	1	0	0	0	1	0	2	1	2	0	0	3	0	0	2	1	0	3	0	1	2	0	0	0	0	1	2	0	2	2	0
1	1	0	1	2	3	1	0	1	1	3	2	1	1	0	0	0	2	0	1	0	0	0	1	0	2	1	0	0	0	3	0	0	1	1	0	1	0	1	3	0	1	0	0	1	3	0	2	2	0
2	0	1	1	2	3	0	0	0	0	4	2	1	1	0	0	0	2	0	2	0	0	0	1	0	2	1	0	0	0	3	0	0	2	1	0	3	0	0	2	1	0	0	0	3	0	0	3	2	0
0	1	0	1	0	3	1	0	1	1	3	1	3	1	0	0	0	2	0	3	0	0	1	1	0	2	1	0	0	0	3	0	0	1	1	0	1	0	1	3	0	3	2	0	1	3	0	3	2	0
3	2	0	1	0	3	0	0	2	0	3	0	1	1	0	0	2	2	0	3	0	0	2	0	0	2	1	0	0	0	1	0	0	4	1	0	1	1	2	3	1	0	2	1	1	0	0	3	1	0
2	2	0	1	0	4	0	0	2	0	3	0	1	0	0	0	2	2	0	3	0	0	2	0	0	2	1	0	0	0	0	0	0	3	1	0	1	1	2	3	1	0	3	2	1	0	0	4	0	0
3	2	0	1	0	4	0	0	0	0	4	1	1	1	0	0	0	1	0	1	0	0	0	0	0	1	1	2	0	0	1	0	0	3	1	0	0	0	0	3	0	0	3	0	1	0	0	4	1	0
1	0	0	1	0	4	0	0	0	0	4	3	1	1	0	0	2	0	1	2	0	2	0	0	0	0	0	0	1	0	3	0	0	1	1	0	0	1	0	2	0	0	3	0	3	0	0	4	0	0
4	0	2	1	0	3	0	0	0	0	4	1	1	3	0	1	0	1	1	3	0	1	0	0	0	0	1	0	0	0	1	0	0	4	1	0	0	0	0	3	0	0	2	0	1	2	2	2	3	2
2	3	0	1	0	3	0	0	1	1	3	0	1	1	0	0	0	1	0	1	0	0	1	0	0	1	1	2	0	0	1	0	0	3	1	0	0	0	0	3	0	1	2	0	1	1	0	3	1	0
2	0	0	1	0	4	0	0	0	0	3	1	1	1	0	0	0	0	0	1	0	0	1	1	0	0	0	0	1	0	3	2	2	3	1	0	0	1	0	3	0	0	3	0	1	2	0	3	0	0
2	2	0	1	1	4	0	0	0	0	3	0	1	3	0	0	0	0	1	1	0	0	0	1	0	1	0	2	1	0	1	0	0	3	0	0	0	1	0	2	1	0	3	1	1	0	0	3	0	0
0	0	2	1	2	4	0	0	0	0	2	1	1	1	0	0	0	0	0	1	0	0	1	1	0	0	1	0	0	0	3	0	0	1	1	0	0	0	0	2	0	0	3	0	1	2	0	3	1	0
0	0	0	1	2	4	0	0	0	0	2	1	1	1	0	0	0	0	0	1	0	0	1	1	0	0	1	0	0	0	3	0	0	1	1	0	0	0	0	3	0	0	3	0	1	2	0	3	1	0
2	2	0	1	1	4	0	0	0	0	2	0	1	3	0	0	0	0	1	1	0	0	1	1	0	1	1	2	0	0	1	0	0	3	1	0	0	0	0	2	0	0	3	0	1	0	0	3	1	0
1	0	1	1	0	1	0	1	0	0	4	0	1	1	0	0	0	2	0	1	0	0	0	0	0	0	1	0	1	0	1	0	0	4	0	0	0	2	3	2	1	0	0	1	1	0	0	2	1	0
0	0	1	1	0	2	0	1	0	0	3	0	1	0	0	0	0	2	0	1	0	0	1	0	0	0	1	0	1	0	0	0	0	3	1	0	0	2	3	2	0	0	1	1	1	0	0	3	0	0
0	0	0	1	0	3	0	0	0	0	4	2	1	1	0	0	2	1	1	1	0	2	1	0	0	0	0	0	1	0	3	0	0	3	1	0	0	1	2	2	1	0	1	0	3	0	0	3	0	0
0	0	0	1	0	3	0	0	0	0	4	2	1	0	0	0	2	1	1	1	0	2	1	0	0	0	1	0	0	0	2	0	0	3	1	0	0	0	2	2	1	0	1	1	3	0	0	3	0	0
2	0	0	1	0	2	0	0	0	0	4	0	1	3	0	0	0	2	1	1	0	0	0	0	0	0	1	0	0	0	1	0	0	4	0	0	0	0	2	2	2	0	1	1	1	0	0	1	1	0
0	0	0	1	0	2	0	0	0	0	4	0	1	1	0	0	0	2	1	1	0	0	0	0	0	0	1	0	0	0	1	0	0	3	0	0	0	2	3	2	3	0	1	1	1	0	0	3	1	0
2	0	2	1	0	4	0	0	0	0	4	0	1	3	0	1	0	3	1	3	0	0	1	0	0	2	0	0	1	0	1	0	0	3	0	0	1	1	0	3	1	0	1	1	1	2	2	3	2	2
1	0	0	1	0	3	0	0	0	0	3	0	1	1	0	0	0	2	1	1	0	0	1	0	0	2	1	0	0	0	1	0	0	4	0	0	1	0	0	2	1	0	0	1	1	0	0	3	1	1
0	0	0	1	2	4	1	0	0	0	3	1	1	0	0	0	0	2	0	1	0	0	0	1	0	2	1	0	0	0	2	0	0	1	0	0	1	0	1	3	1	0	1	2	1	2	0	3	1	0
1	2	1	1	2	4	1	0	0	0	4	1	1	1	0	0	0	2	0	3	0	0	0	0	0	3	0	2	1	0	3	0	0	3	2	0	1	1	0	2	0	0	1	0	1	2	0	4	2	0
4	2	0	1	0	3	0	0	2	0	4	1	1	1	0	0	2	2	0	3	0	0	1	0	0	2	1	0	0	0	1	0	0	4	1	0	1	1	2	3	1	0	2	1	1	0	0	3	1	0
3	2	1	1	1	4	1	0	0	0	3	1	1	2	0	0	0	2	0	1	0	0	0	1	0	3	1	2	0	0	0	0	0	3	1	0	1	0	0	2	0	0	1	1	1	0	0	3	0	0
2	2	0	1	0	4	0	0	0	0	4	0	1	1	0	0	0	1	0	1	0	0	0	0	0	1	1	2	0	0	1	0	0	3	0	0	0	0	0	3	1	0	3	1	1	0	0	4	1	0
3	2	0	1	0	3	0	0	0	0	4	0	1	1	0	0	0	1	0	1	0	0	0	0	0	1	1	2	0	0	1	0	0	4	0	0	0	0	0	3	1	0	2	1	1	0	0	3	1	0
2	1	0	1	0	3	0	0	1	1	4	1	1	1	0	0	0	0	0	1	0	0	0	1	0	0	1	0	0	0	3	2	2	3	0	0	0	0	0	3	1	1	2	1	1	3	0	2	1	0
0	0	0	1	0	4	0	0	0	0	4	2	1	1	0	0	2	0	1	2	0	2	0	0	0	0	1	0	0	0	3	0	0	1	0	0	0	0	0	2	1	0	3	1	3	0	0	4	1	0
1	3	0	1	2	3	0	0	1	1	4	1	1	1	0	0	0	0	1	3	0	0	0	0	0	1	1	2	0	0	3	0	0	3	2	0	0	0	0	2	0	1	2	0	1	3	0	3	3	0
0	1	2	1	2	3	0	0	1	1	3	1	1	1	0	0	0	0	0	1	0	0	0	1	0	0	1	0	0	0	3	0	0	1	0	0	0	0	0	2	1	1	2	1	1	3	0	2	1	0
0	0	0	1	2	4	0	0	0	0	3	1	1	1	0	0	0	0	0	1	0	0	0	1	0	0	0	0	1	0	3	0	0	1	0	0	0	1	0	3	1	0	3	1	1	2	0	3	0	0
1	0	0	1	0	4	0	0	0	0	4	2	3	1	0	0	0	0	0	3	0	0	0	1	0	0	1	0	0	0	3	0	0	1	1	0	0	0	0	3	0	2	4	0	1	2	0	4	1	0
1	0	0	1	2	4	0	0	0	0	3	2	1	1	0	0	0	0	0	1	0	0	0	1	0	0	1	0	0	0	3	0	0	1	1	0	0	0	0	3	0	0	3	0	1	2	0	3	1	0
0	1	0	1	0	3	0	0	1	1	3	1	3	1	0	0	0	0	0	3	0	0	1	1	0	0	1	0	0	0	3	0	0	1	1	0	0	0	0	3	0	3	3	0	1	3	0	3	1	0
2	3	0	1	0	3	0	0	3	1	3	0	1	1	0	0	2	0	0	3	0	0	1	0	0	0	1	0	0	0	1	0	0	3	1	0	0	1	2	3	0	1	3	1	1	1	0	3	1	0
1	2	0	1	2	1	0	0	0	0	5	0	1	1	0	0	0	0	0	3	0	0	0	0	0	1	1	2	0	0	3	0	0	5	1	0	0	0	2	2	1	0	0	1	1	2	0	2	3	0
3	0	0	1	0	1	0	0	0	0	4	1	1	1	0	0	0	0	0	1	0	0	1	1	0	0	1	0	0	0	3	2	2	5	1	0	0	0	2	3	0	0	0	0	1	2	0	0	1	0
0	0	0	1	0	3	0	0	0	0	4	0	1	1	0	0	0	1	1	1	0	0	0	0	0	0	0	0	1	0	1	0	0	4	0	0	0	1	2	2	2	0	1	1	1	0	0	3	0	0
4	0	0	1	0	1	0	0	0	0	4	1	1	3	0	0	0	2	1	1	0	0	0	0	0	0	1	0	0	0	1	0	0	5	1	0	0	0	2	2	1	0	0	0	1	0	0	0	1	0
0	2	1	1	2	4	1	0	0	0	4	0	1	1	0	0	0	2	0	3	0	0	0	0	0	3	0	2	1	0	3	0	0	3	1	0	1	1	0	2	1	0	1	1	1	2	0	4	2	0
0	2	1	1	2	4	1	0	0	0	4	0	1	0	0	0	0	2	0	3	0	0	0	0	0	3	1	2	0	0	2	0	0	3	1	0	1	0	0	2	1	0	1	2	1	2	0	4	2	0
0	0	1	1	0	4	0	1	0	0	3	0	1	1	0	0	0	3	0	1	0	0	1	0	0	2	1	0	1	0	1	0	0	1	0	0	1	2	2	2	1	0	1	1	1	0	0	4	1	0
0	1	1	1	0	3	0	1	1	1	3	0	1	1	0	0	0	2	0	1	0	2	1	0	0	2	1	0	1	0	1	0	0	1	0	0	1	0	0	2	1	1	2	1	1	1	0	3	1	0
0	0	0	1	0	4	1	2	2	0	4	1	1	0	0	0	0	2	0	1	0	0	0	1	0	2	1	2	0	0	2	0	0	1	0	0	3	0	1	2	1	0	1	2	1	2	0	3	1	0
3	0	2	1	0	4	0	0	0	0	4	1	1	3	0	1	0	3	1	3	0	0	1	0	0	2	1	0	0	0	1	0	0	3	1	0	1	0	0	3	0	0	1	0	1	2	2	3	3	2
1	0	1	1	2	4	0	0	0	0	4	2	1	0	0	0	0	2	0	2	0	0	0	1	0	2	1	0	0	0	2	0	0	1	1	0	3	0	0	2	1	0	1	1	3	0	0	4	1	0
0	0	1	1	0	4	0	1	0	0	2	0	1	0	0	0	0	3	0	1	0	0	2	0	0	2	1	0	1	0	0	0	0	1	1	0	1	2	2	2	0	0	1	1	1	0	0	4	0	0
1	0	0	1	0	3	0	0	0	0	2	0	1	1	0	0	0	2	1	1	0	0	2	0	0	2	1	0	0	0	1	0	0	4	1	0	1	0	0	2	0	0	0	0	1	0	0	3	1	1
0	0	0	1	2	4	1	0	0	0	2	1	1	1	0	0	0	2	0	1	0	0	1	1	0	2	0	0	1	0	3	0	0	1	1	0	1	1	1	3	0	0	1	0	1	2	0	3	1	0
0	0	1	1	0	4	0	1	0	0	3	0	1	0	0	0	0	2	0	1	0	0	1	0	0	0	1	0	1	0	0	0	0	1	1	0	0	2	2	2	0	0	3	1	1	0	0	4	0	0
0	0	0	1	0	4	0	0	0	0	4	1	3	1	0	0	0	0	0	3	0	0	0	1	0	0	1	0	0	0	3	0	0	1	0	0	0	0	0	3	1	2	4	1	1	2	0	4	1	0
1	0	0	1	0	3	0	0	0	0	4	1	3	1	0	0	0	0	0	3	0	0	0	1	0	0	1	0	0	0	3	0	0	2	0	0	0	0	0	3	1	2	3	1	1	2	0	3	1	0
3	2	0	1	1	4	0	0	0	0	3	1	1	3	0	0	0	0	1	1	0	0	0	1	0	1	1	2	0	0	1	0	0	3	1	0	0	0	0	2	0	0	3	0	1	0	0	3	1	0
1	0	1	1	0	2	0	1	0	0	4	1	1	0	0	0	0	2	0	1	0	0	0	0	0	0	1	0	1	0	0	0	0	3	1	0	0	2	3	2	0	0	1	1	1	0	0	3	0	0
1	0	0	1	0	1	0	0	0	0	4	0	1	1	0	0	0	2	1	1	0	0	0	0	0	0	1	0	0	0	1	0	0	4	0	0	0	2	3	2	3	0	0	1	1	0	0	2	1	0
4	0	0	1	0	1	0	0	0	0	4	1	1	1	0	0	0	2	1	1	0	0	0	0	0	0	1	0	0	0	1	2	0	5	1	0	0	0	2	2	1	0	0	0	1	0	0	0	1	0
0	3	1	1	2	3	1	0	1	1	4	0	1	1	0	0	0	2	0	3	0	0	0	0	0	3	1	2	0	0	3	0	0	3	1	0	1	0	0	2	1	1	0	1	1	3	0	3	3	0
0	0	0	1	0	4	0	0	0	0	4	2	1	1	0	0	2	2	1	1	0	2	1	0	0	2	0	0	1	0	3	0	0	1	0	0	1	1	0	2	1	0	1	1	3	0	0	4	0	1
2	0	1	1	0	3	0	1	0	0	3	1	1	1	0	0	0	2	0	1	0	2	1	0	0	2	1	0	1	0	1	0	0	2	1	0	1	0	0	2	0	0	2	0	1	0	0	3	1	0
1	0	1	1	0	4	0	1	0	0	3	1	1	1	0	0	0	2	0	1	0	2	1	0	0	2	0	0	2	0	1	0	0	1	1	0	1	1	0	2	0	0	3	0	1	0	0	4	0	0
1	2	1	1	2	4	1	0	0	0	4	1	1	1	0	0	0	2	0	3	0	0	0	0	0	3	1	2	0	0	3	0	0	3	2	0	1	0	0	2	0	0	1	0	1	2	0	4	3	0
1	0	0	1	0	4	0	0	0	0	3	1	1	1	0	0	0	2	1	1	0	0	1	0	0	2	1	0	0	0	1	0	0	3	1	0	1	0	0	2	0	0	1	0	1	0	0	4	1	1
1	1	0	1	0	3	0	0	1	1	3	1	1	1	0	0	0	2	1	1	0	0	1	0	0	2	1	0	0	0	1	0	0	3	1	0	1	0	0	2	0	1	0	0	1	1	0	3	1	1
2	0	0	1	0	3	1	0	0	0	4	2	3	1	0	0	0	2	0	3	0	0	0	1	0	2	1	0	0	0	3	0	0	2	1	0	1	0	1	3	0	2	2	0	1	2	0	3	2	0
0	0	1	1	0	4	0	1	0	0	2	0	1	1	0	0	0	3	0	1	0	0	2	0	0	2	1	0	1	0	1	0	0	1	1	0	1	2	2	2	0	0	1	0	1	0	0	4	1	0
0	0	1	1	0	4	0	1	0	0	2	0	1	1	0	0	0	3	0	1	0	0	2	0	0	2	0	0	2	0	1	0	0	1	1	0	1	3	2	2	0	0	1	0	1	0	0	4	0	0
2	1	0	1	0	3	1	0	1	1	3	1	1	1	0	0	0	2	0	1	0	0	1	1	0	2	1	0	0	0	3	2	2	3	1	0	1	0	1	3	0	1	0	0	1	3	0	2	2	0
1	0	1	1	0	3	0	1	0	0	2	0	1	1	0	0	0	2	0	1	0	2	2	0	0	2	1	0	1	0	1	0	0	2	1	0	1	0	0	2	0	0	2	0	1	0	0	3	1	0
1	2	1	1	2	3	1	0	0	0	3	0	1	1	0	0	0	2	0	3	0	0	1	0	0	3	1	2	0	0	3	0	0	4	2	0	1	0	0	2	0	0	0	0	1	2	0	3	3	0
0	0	0	1	0	4	0	0	0	0	4	2	1	0	0	0	2	0	1	2	0	2	0	0	0	0	1	0	0	0	2	0	0	1	0	0	0	0	0	2	1	0	3	2	3	0	0	4	0	0
1	2	0	1	2	4	0	0	0	0	4	1	1	0	0	0	0	0	1	3	0	0	0	0	0	1	1	2	0	0	2	0	0	3	2	0	0	0	0	2	0	0	3	1	1	2	0	4	2	0
2	1	0	1	0	3	0	0	1	1	3	1	1	1	0	0	0	0	0	1	0	0	1	1	0	0	1	0	0	0	3	2	2	3	1	0	0	0	0	3	0	1	2	0	1	3	0	2	1	0
1	0	0	1	0	3	0	0	0	0	3	2	1	1	0	0	2	0	1	2	0	2	1	0	0	0	1	0	0	0	3	0	0	2	1	0	0	0	0	2	0	0	2	0	3	0	0	3	1	0
0	3	0	1	2	3	0	0	1	1	3	0	1	1	0	0	0	0	1	3	0	0	1	0	0	1	1	2	0	0	3	0	0	3	2	0	0	0	0	2	0	1	2	0	1	3	0	3	3	0
0	2	0	1	2	4	0	0	0	0	3	0	1	0	0	0	0	0	1	3	0	0	1	0	0	1	1	2	0	0	2	0	0	3	2	0	0	0	0	2	0	0	3	1	1	2	0	4	2	0
2	1	0	1	0	1	0	0	1	1	5	1	1	1	0	0	0	0	0	1	0	0	0	1	0	0	1	0	0	0	3	2	2	4	0	0	0	0	2	3	1	1	0	1	1	3	0	0	1	0
0	3	0	1	2	1	0	0	1	1	5	0	1	1	0	0	0	0	0	3	0	0	0	0	0	1	1	2	0	0	3	0	0	4	1	0	0	0	2	2	1	1	0	1	1	3	0	2	3	0
2	0	2	1	0	2	0	0	0	0	5	0	1	2	0	1	0	2	1	3	0	1	0	0	0	0	1	0	0	0	0	0	0	4	0	0	0	0	2	3	2	0	1	2	1	2	2	1	2	2
3	2	0	1	0	2	0	0	0	0	5	1	1	1	0	0	0	1	0	1	0	0	0	0	0	1	1	2	0	0	1	0	0	4	1	0	1	0	2	3	0	0	1	0	1	0	0	3	1	0
4	2	0	1	0	1	0	0	0	0	5	1	1	1	0	0	0	1	0	1	0	0	0	0	0	1	1	2	0	0	1	0	0	5	1	0	1	0	2	3	0	0	0	0	1	0	0	2	1	0
1	0	0	1	0	2	0	0	0	0	4	0	1	1	0	0	0	1	1	1	0	0	0	0	0	0	1	0	0	0	1	0	0	5	0	0	0	0	2	2	2	0	0	1	1	0	0	2	1	0
0	0	0	1	0	2	0	0	0	0	4	0	1	1	0	0	0	2	1	1	0	0	0	0	0	0	0	0	1	0	1	0	0	3	0	0	0	3	3	2	3	0	1	1	1	0	0	3	0	0
3	0	0	1	0	2	0	0	0	0	4	1	1	1	0	0	0	2	1	1	0	0	0	0	0	0	0	0	1	0	1	2	0	4	1	0	0	1	2	2	1	0	1	0	1	0	0	1	0	0
1	0	0	1	0	2	0	0	0	0	3	0	1	3	0	0	0	2	1	1	0	0	1	0	0	0	1	0	0	0	1	0	0	4	1	0	0	0	2	2	1	0	0	0	1	0	0	0	1	0
0	1	0	1	0	2	0	0	1	1	3	0	1	3	0	0	0	2	1	1	0	0	1	0	0	0	1	0	0	0	1	0	0	3	1	0	0	0	2	2	1	1	0	0	1	1	0	0	1	0
0	0	0	1	0	4	0	0	0	0	3	0	1	1	0	0	0	2	1	1	0	0	1	0	0	2	1	0	0	0	1	0	0	3	0	0	1	0	0	2	1	0	1	1	1	0	0	4	1	1
1	0	0	1	0	3	0	0	0	0	4	2	1	1	0	0	2	2	1	1	0	2	1	0	0	2	1	0	0	0	3	0	0	2	0	0	1	0	0	2	1	0	0	1	3	0	0	3	1	1
2	0	0	1	0	3	0	0	0	0	3	1	1	1	0	0	0	2	1	1	0	0	1	0	0	2	1	0	0	0	1	0	0	4	1	0	1	0	0	2	0	0	0	0	1	0	0	3	1	1
0	3	1	1	2	3	1	0	1	1	3	0	1	1	0	0	0	2	0	3	0	0	1	0	0	3	1	2	0	0	3	0	0	3	2	0	1	0	0	2	0	1	0	0	1	3	0	3	3	0
3	0	2	1	0	4	0	0	0	0	4	1	1	3	0	1	0	1	1	3	0	1	0	0	0	0	0	0	1	0	1	0	0	3	1	0	0	1	0	3	0	0	3	0	1	2	2	3	2	2
1	2	0	1	2	3	0	0	0	0	3	0	1	1	0	0	0	0	1	3	0	0	1	0	0	1	1	2	0	0	3	0	0	4	2	0	0	0	0	2	0	0	2	0	1	2	0	3	3	0
3	2	0	1	0	3	0	0	2	0	3	0	1	1	0	0	2	0	0	3	0	0	1	0	0	0	1	0	0	0	1	0	0	4	1	0	0	1	2	3	0	0	3	1	1	0	0	3	1	0
1	0	0	1	2	3	0	0	0	0	2	1	1	1	0	0	0	0	0	1	0	0	1	1	0	0	1	0	0	0	3	0	0	2	1	0	0	0	0	3	0	0	2	0	1	2	0	2	1	0
2	2	0	1	1	4	0	0	0	0	2	0	1	3	0	0	0	0	1	1	0	0	1	1	0	1	0	2	1	0	1	0	0	3	1	0	0	1	0	2	0	0	3	0	1	0	0	3	0	0
2	0	0	1	0	2	0	0	0	0	4	1	1	1	0	0	0	0	0	1	0	0	1	1	0	0	0	0	1	0	3	2	2	4	1	0	0	1	2	3	0	0	1	0	1	2	0	1	0	0
0	2	0	1	2	2	0	0	0	0	4	0	1	1	0	0	0	0	0	3	0	0	1	0	0	1	1	2	0	0	3	0	0	4	2	0	0	0	2	2	0	0	1	0	1	2	0	3	3	0
2	1	0	1	0	1	0	0	1	1	4	0	1	1	0	0	0	2	1	1	0	0	0	0	0	0	1	0	0	0	1	2	0	4	0	0	0	0	2	2	2	1	0	1	1	1	0	0	1	0
3	0	0	1	0	2	0	0	0	0	4	1	1	0	0	0	0	2	1	1	0	0	0	0	0	0	1	0	0	0	0	2	0	4	1	0	0	0	2	2	1	0	1	1	1	0	0	1	0	0
1	0	0	1	0	3	0	0	0	0	4	1	1	2	0	0	0	2	1	1	0	0	0	0	0	0	1	0	0	0	0	0	0	3	1	0	0	0	2	2	1	0	1	1	1	0	0	1	0	0
3	0	0	1	0	1	0	0	0	0	3	0	1	3	0	0	0	2	1	1	0	0	1	0	0	0	1	0	0	0	1	0	0	5	1	0	0	0	2	2	1	0	0	0	1	0	0	0	1	0
2	1	0	1	0	3	1	0	1	1	4	1	1	1	0	0	0	2	0	1	0	0	0	1	0	2	1	0	0	0	3	2	2	3	0	0	1	0	1	3	1	1	0	1	1	3	0	2	2	0
2	2	0	1	0	4	0	0	2	0	4	0	1	1	0	0	2	2	0	3	0	0	1	0	0	2	0	0	1	0	1	0	0	3	0	0	1	2	2	3	2	0	3	2	1	0	0	4	0	0
1	0	1	1	2	3	0	0	0	0	4	1	1	1	0	0	0	2	0	2	0	0	0	1	0	2	1	0	0	0	3	0	0	2	0	0	3	0	0	2	2	0	0	1	3	0	0	3	2	0
1	0	0	1	0	4	1	2	2	0	4	2	1	1	0	0	0	2	0	1	0	0	0	1	0	2	1	2	0	0	3	0	0	1	1	0	3	0	1	2	0	0	1	0	1	2	0	3	2	0
3	0	2	1	0	4	0	0	0	0	4	1	1	3	0	1	0	3	1	3	0	0	1	0	0	2	0	0	1	0	1	0	0	3	1	0	1	1	0	3	0	0	1	0	1	2	2	3	2	2
1	0	0	1	0	4	1	0	0	0	4	2	3	0	0	0	0	2	0	3	0	0	0	1	0	2	1	0	0	0	2	0	0	1	1	0	1	0	1	3	0	2	3	1	1	2	0	4	1	0
0	1	1	1	0	3	0	1	1	1	2	0	1	1	0	0	0	3	0	1	0	0	2	0	0	2	1	0	1	0	1	0	0	1	1	0	1	2	2	2	0	1	0	0	1	1	0	3	1	0
2	0	0	1	0	4	0	0	0	0	2	0	1	2	0	0	0	3	1	1	0	0	2	0	0	2	1	0	0	0	0	0	0	3	1	0	1	0	0	2	0	0	1	1	1	0	0	3	0	1
2	3	0	1	0	3	0	0	1	1	4	0	1	1	0	0	0	1	0	1	0	0	0	0	0	1	1	2	0	0	1	0	0	3	0	0	0	0	0	3	1	1	2	1	1	1	0	3	1	0
0	1	0	1	0	3	0	0	1	1	4	2	1	1	0	0	2	0	1	2	0	2	0	0	0	0	1	0	0	0	3	0	0	1	0	0	0	0	0	2	1	1	2	1	3	1	0	3	1	0
0	0	0	1	0	4	0	0	0	0	4	1	3	0	0	0	0	0	0	3	0	0	0	1	0	0	1	0	0	0	2	0	0	1	0	0	0	0	0	3	1	2	4	2	1	2	0	4	0	0
0	1	0	1	2	3	0	0	1	1	2	1	1	1	0	0	0	0	0	1	0	0	1	1	0	0	1	0	0	0	3	0	0	1	1	0	0	0	0	3	0	1	2	0	1	3	0	2	1	0
2	0	0	1	0	2	0	0	0	0	5	1	1	1	0	0	0	0	0	1	0	0	0	1	0	0	0	0	1	0	3	2	2	4	0	0	0	1	2	3	1	0	1	1	1	2	0	1	0	0
1	2	0	1	2	2	0	0	0	0	5	1	1	0	0	0	0	0	0	3	0	0	0	0	0	1	1	2	0	0	2	0	0	4	2	0	0	0	2	2	0	0	1	1	1	2	0	3	2	0
1	0	0	1	0	3	0	0	0	0	4	1	1	1	0	0	0	1	1	1	0	0	0	0	0	0	0	0	1	0	1	0	0	4	1	0	0	1	2	2	1	0	1	0	1	0	0	3	0	0
2	0	0	1	0	2	0	0	0	0	3	0	1	3	0	0	0	2	1	1	0	0	1	0	0	0	0	0	1	0	1	0	0	4	1	0	0	1	2	2	1	0	1	0	1	0	0	1	0	0
2	0	0	1	0	4	0	0	0	0	3	0	1	1	0	0	0	3	1	1	0	0	1	0	0	2	1	0	0	0	1	2	0	3	0	0	1	0	0	2	1	0	1	1	1	0	0	3	1	1
0	0	0	1	0	4	0	0	0	0	3	0	1	0	0	0	0	2	1	1	0	0	1	0	0	2	1	0	0	0	0	0	0	3	0	0	1	0	0	2	1	0	1	2	1	0	0	4	0	1
1	0	1	1	0	3	0	1	0	0	3	0	1	1	0	0	0	3	0	1	0	0	1	0	0	2	1	0	1	0	1	0	0	2	0	0	1	2	2	2	1	0	0	1	1	0	0	3	1	0
0	1	0	1	0	3	1	2	3	1	4	1	1	1	0	0	0	2	0	1	0	0	0	1	0	2	1	2	0	0	3	0	0	1	0	0	3	0	1	2	1	1	0	1	1	3	0	2	2	0
0	0	0	1	0	4	1	0	0	0	4	1	3	1	0	0	0	2	0	3	0	0	0	1	0	2	1	0	0	0	3	0	0	1	0	0	1	0	1	3	1	2	3	1	1	2	0	4	2	0
1	0	1	1	0	4	0	1	0	0	3	1	1	0	0	0	0	3	0	1	0	0	1	0	0	2	1	0	1	0	0	0	0	1	1	0	1	2	2	2	0	0	1	1	1	0	0	4	0	0
2	0	0	1	0	4	0	0	0	0	2	0	1	3	0	0	0	3	1	1	0	0	2	0	0	2	1	0	0	0	1	0	0	3	1	0	1	0	0	2	0	0	1	0	1	0	0	3	1	1
0	1	1	1	2	3	0	0	1	1	3	1	1	1	0	0	0	2	0	2	0	0	1	1	0	2	1	0	0	0	3	0	0	1	1	0	3	0	0	2	1	1	0	0	3	1	0	3	2	0
3	3	0	1	0	3	0	0	1	1	4	1	1	1	0	0	0	1	0	1	0	0	0	0	0	1	1	2	0	0	1	0	0	3	1	0	0	0	0	3	0	1	2	0	1	1	0	3	1	0
2	1	2	1	0	3	0	0	1	1	3	0	1	3	0	1	0	1	1	3	0	1	1	0	0	0	1	0	0	0	1	0	0	3	1	0	0	0	0	3	0	1	2	0	1	3	2	2	3	2
3	0	2	1	0	1	0	0	0	0	5	0	1	3	0	1	0	2	1	3	0	1	0	0	0	0	1	0	0	0	1	0	0	5	0	0	0	0	2	3	2	0	0	1	1	2	2	0	3	2
1	0	0	1	0	3	0	0	0	0	5	3	1	1	0	0	2	1	1	1	0	2	0	0	0	0	0	0	1	0	3	0	0	3	1	0	0	1	2	2	1	0	1	0	3	0	0	3	0	0
0	0	0	1	0	3	0	0	0	0	4	2	1	1	0	0	2	1	1	1	0	2	1	0	0	0	1	0	0	0	3	0	0	3	1	0	0	0	2	2	1	0	1	0	3	0	0	3	1	0
3	0	0	1	0	2	0	0	0	0	4	1	1	1	0	0	0	2	1	1	0	0	0	0	0	0	1	0	0	0	1	2	0	4	1	0	0	0	2	2	1	0	1	0	1	0	0	1	1	0
0	1	0	1	0	2	0	0	1	1	3	0	1	1	0	0	0	1	1	1	0	0	1	0	0	0	1	0	0	0	1	0	0	4	1	0	0	0	2	2	1	1	0	0	1	1	0	2	1	0
3	0	2	1	0	3	0	0	0	0	4	0	1	3	0	1	0	3	1	3	0	0	1	0	0	2	1	0	0	0	1	0	0	4	0	0	1	0	0	3	1	0	0	1	1	2	2	2	3	2
2	0	2	1	0	4	0	0	0	0	4	0	1	2	0	1	0	3	1	3	0	0	1	0	0	2	1	0	0	0	0	0	0	3	0	0	1	0	0	3	1	0	1	2	1	2	2	3	2	2
2	0	0	1	0	4	0	0	0	0	3	0	1	1	0	0	0	3	1	1	0	0	1	0	0	2	0	0	1	0	1	2	0	3	0	0	1	1	0	2	1	0	1	1	1	0	0	3	0	1
1	0	0	1	0	3	1	0	0	0	3	2	1	1	0	0	2	2	0	1	0	0	0	1	0	2	1	0	0	0	3	0	0	2	0	0	1	0	1	2	1	0	0	1	1	2	0	2	2	0
3	1	2	1	0	3	0	0	1	1	4	1	1	3	0	1	0	3	1	3	0	0	1	0	0	2	1	0	0	0	1	0	0	3	1	0	1	0	0	3	0	1	0	0	1	3	2	2	3	2
1	0	0	1	2	4	1	0	0	0	3	2	1	1	0	0	0	2	0	1	0	0	0	1	0	2	0	0	1	0	3	0	0	1	1	0	1	1	1	3	0	0	1	0	1	2	0	3	1	0
0	0	0	1	0	4	1	0	0	0	2	2	1	0	0	0	2	2	0	1	0	0	1	1	0	2	1	0	0	0	2	0	0	1	1	0	1	0	1	2	0	0	1	1	1	2	0	3	1	0
2	3	0	1	0	3	0	0	3	1	3	0	1	1	0	0	2	2	0	3	0	0	2	0	0	2	1	0	0	0	1	0	0	3	1	0	1	1	2	3	1	1	2	1	1	1	0	3	1	0
2	2	1	1	1	4	1	0	0	0	2	0	1	2	0	0	0	2	0	1	0	0	1	1	0	3	1	2	0	0	0	0	0	3	1	0	1	0	0	2	0	0	1	1	1	0	0	3	0	0
0	0	1	1	0	4	0	1	0	0	3	0	1	1	0	0	0	2	0	1	0	0	1	0	0	0	0	0	2	0	1	0	0	1	1	0	0	3	2	2	0	0	3	0	1	0	0	4	0	0
2	0	0	1	0	4	0	0	0	0	3	1	1	1	0	0	0	0	0	1	0	0	1	1	0	0	1	0	0	0	3	2	2	3	1	0	0	0	0	3	0	0	3	0	1	2	0	3	1	0
0	0	0	1	0	4	0	0	0	0	3	2	1	1	0	0	2	0	1	2	0	2	1	0	0	0	1	0	0	0	3	0	0	1	1	0	0	0	0	2	0	0	3	0	3	0	0	4	1	0
0	0	2	1	2	4	0	0	0	0	3	1	1	1	0	0	0	0	0	1	0	0	0	1	0	0	1	0	0	0	3	0	0	1	0	0	0	0	0	2	1	0	3	1	1	2	0	3	1	0
0	1	2	1	2	3	0	0	1	1	2	1	1	1	0	0	0	0	0	1	0	0	1	1	0	0	1	0	0	0	3	0	0	1	1	0	0	0	0	2	0	1	2	0	1	3	0	2	1	0
0	0	2	1	2	4	0	0	0	0	2	1	1	1	0	0	0	0	0	1	0	0	1	1	0	0	0	0	1	0	3	0	0	1	1	0	0	1	0	2	0	0	3	0	1	2	0	3	0	0
2	2	0	1	0	2	0	0	0	0	5	0	1	1	0	0	0	1	0	1	0	0	0	0	0	1	0	2	1	0	1	0	0	4	0	0	1	1	2	3	1	0	1	1	1	0	0	3	0	0
0	2	0	1	2	2	0	0	0	0	5	0	1	1	0	0	0	0	0	3	0	0	0	0	0	1	0	2	1	0	3	0	0	4	1	0	0	1	2	2	1	0	1	1	1	2	0	3	2	0
2	0	2	1	0	2	0	0	0	0	5	0	1	3	0	1	0	2	1	3	0	1	0	0	0	0	1	0	0	0	1	0	0	4	0	0	0	0	2	3	2	0	1	1	1	2	2	1	3	2
3	3	0	1	0	1	0	0	1	1	5	1	1	1	0	0	0	1	0	1	0	0	0	0	0	1	1	2	0	0	1	0	0	4	1	0	1	0	2	3	0	1	0	0	1	1	0	2	1	0
1	0	1	1	0	2	0	1	0	0	4	1	1	1	0	0	0	2	0	1	0	0	0	0	0	0	1	0	1	0	1	0	0	3	1	0	0	2	3	2	0	0	1	0	1	0	0	3	1	0
3	0	2	1	0	2	0	0	0	0	5	1	1	3	0	1	0	2	1	3	0	1	0	0	0	0	1	0	0	0	1	0	0	4	1	0	0	0	2	3	1	0	1	0	1	2	2	1	3	2
2	2	0	1	0	2	0	0	0	0	4	0	1	1	0	0	0	1	0	1	0	0	1	0	0	1	0	2	1	0	1	0	0	4	1	0	1	1	2	3	0	0	1	0	1	0	0	3	0	0
3	0	2	1	0	1	0	0	0	0	4	0	1	3	0	1	0	2	1	3	0	1	1	0	0	0	1	0	0	0	1	0	0	5	1	0	0	0	2	3	1	0	0	0	1	2	2	0	3	2
2	0	0	1	0	2	0	0	0	0	3	0	1	2	0	0	0	2	1	1	0	0	1	0	0	0	1	0	0	0	0	0	0	4	1	0	0	0	2	2	1	0	1	1	1	0	0	1	0	0
1	0	0	1	0	1	0	0	0	0	3	0	1	1	0	0	0	2	1	1	0	0	1	0	0	0	1	0	0	0	1	0	0	4	1	0	0	2	3	2	2	0	0	0	1	0	0	2	1	0
0	1	0	1	0	3	0	0	1	1	4	2	1	1	0	0	2	2	1	1	0	2	1	0	0	2	1	0	0	0	3	0	0	1	0	0	1	0	0	2	1	1	0	1	3	1	0	3	1	1
1	0	0	1	2	3	1	0	0	0	3	1	1	1	0	0	0	2	0	1	0	0	0	1	0	2	1	0	0	0	3	0	0	2	0	0	1	0	1	3	1	0	0	1	1	2	0	2	2	0
4	0	0	1	0	3	0	0	0	0	3	1	1	1	0	0	0	3	1	1	0	0	1	0	0	2	1	0	0	0	1	2	0	4	1	0	1	0	0	2	0	0	0	0	1	0	0	2	1	1
1	0	0	1	0	4	1	0	0	0	3	3	1	1	0	0	2	2	0	1	0	0	0	1	0	2	0	0	1	0	3	0	0	1	1	0	1	1	1	2	0	0	1	0	1	2	0	3	1	0
0	0	1	1	0	4	0	1	0	0	2	0	1	1	0	0	0	2	0	1	0	2	2	0	0	2	1	0	1	0	1	0	0	1	1	0	1	0	0	2	0	0	3	0	1	0	0	4	1	0
0	1	0	1	0	3	0	0	1	1	2	0	1	3	0	0	0	3	1	1	0	0	2	0	0	2	1	0	0	0	1	0	0	1	1	0	1	0	0	2	0	1	0	0	1	1	0	2	1	1
2	3	1	1	1	3	1	0	1	1	2	0	1	3	0	0	0	2	0	1	0	0	1	1	0	3	1	2	0	0	1	0	0	3	1	0	1	0	0	2	0	1	0	0	1	1	0	2	1	0
0	0	1	1	2	4	0	0	0	0	3	1	1	1	0	0	0	2	0	2	0	0	1	1	0	2	1	0	0	0	3	0	0	1	1	0	3	0	0	2	1	0	1	0	3	0	0	4	2	0
0	0	1	1	0	4	0	1	0	0	4	0	1	1	0	0	0	2	0	1	0	0	0	0	0	0	1	0	1	0	1	0	0	1	0	0	0	2	2	2	1	0	3	1	1	0	0	4	1	0
3	0	0	1	0	3	0	0	0	0	4	1	1	1	0	0	0	0	0	1	0	0	0	1	0	0	1	0	0	0	3	2	2	4	0	0	0	0	0	3	1	0	2	1	1	2	0	2	1	0
2	2	0	1	2	3	0	0	0	0	4	1	1	1	0	0	0	0	1	3	0	0	0	0	0	1	1	2	0	0	3	0	0	4	2	0	0	0	0	2	0	0	2	0	1	2	0	3	3	0
2	0	2	1	0	4	0	0	0	0	3	0	1	3	0	1	0	1	1	3	0	1	1	0	0	0	1	0	0	0	1	0	0	3	1	0	0	0	0	3	0	0	3	0	1	2	2	3	3	2
2	0	0	1	2	3	0	0	0	0	3	2	1	1	0	0	0	0	0	1	0	0	0	1	0	0	1	0	0	0	3	0	0	2	1	0	0	0	0	3	0	0	2	0	1	2	0	2	1	0
3	3	0	1	1	3	0	0	1	1	3	1	1	3	0	0	0	0	1	1	0	0	0	1	0	1	1	2	0	0	1	0	0	3	1	0	0	0	0	2	0	1	2	0	1	1	0	2	1	0
0	0	1	1	0	2	0	1	0	0	4	0	1	1	0	0	0	2	0	1	0	0	0	0	0	0	0	0	2	0	1	0	0	3	0	0	0	3	3	2	1	0	1	1	1	0	0	3	0	0
1	0	1	1	0	2	0	1	0	0	4	1	1	1	0	0	0	2	0	1	0	0	0	0	0	0	0	0	2	0	1	0	0	3	1	0	0	3	3	2	0	0	1	0	1	0	0	3	0	0
3	0	0	1	0	2	0	0	0	0	5	2	1	1	0	0	0	0	0	1	0	0	0	1	0	0	1	0	0	0	3	2	2	4	1	0	0	0	2	3	0	0	1	0	1	2	0	1	1	0
0	3	0	1	2	1	0	0	1	1	4	0	1	1	0	0	0	0	0	3	0	0	1	0	0	1	1	2	0	0	3	0	0	4	2	0	0	0	2	2	0	1	0	0	1	3	0	2	3	0
3	0	0	1	0	1	0	0	0	0	4	0	1	1	0	0	0	2	1	1	0	0	0	0	0	0	1	0	0	0	1	2	0	5	0	0	0	0	2	2	2	0	0	1	1	0	0	0	1	0
2	1	0	1	0	1	0	0	1	1	4	0	1	3	0	0	0	2	1	1	0	0	0	0	0	0	1	0	0	0	1	0	0	4	0	0	0	0	2	2	2	1	0	1	1	1	0	0	1	0
1	0	0	1	0	2	0	0	0	0	3	0	1	1	0	0	0	1	1	1	0	0	1	0	0	0	1	0	0	0	1	0	0	5	1	0	0	0	2	2	1	0	0	0	1	0	0	2	1	0
3	0	0	1	0	3	0	0	0	0	3	0	1	3	0	0	0	3	1	1	0	0	1	0	0	2	1	0	0	0	1	0	0	4	0	0	1	0	0	2	1	0	0	1	1	0	0	2	1	1
0	0	1	1	0	4	0	1	0	0	3	0	1	1	0	0	0	3	0	1	0	0	1	0	0	2	0	0	2	0	1	0	0	1	0	0	1	3	2	2	1	0	1	1	1	0	0	4	0	0
2	0	0	1	0	4	1	0	0	0	4	1	1	1	0	0	0	2	0	1	0	0	0	1	0	2	0	0	1	0	3	2	2	3	0	0	1	1	1	3	1	0	1	1	1	2	0	3	1	0
3	2	0	1	0	3	0	0	2	0	4	0	1	1	0	0	2	2	0	3	0	0	1	0	0	2	1	0	0	0	1	0	0	4	0	0	1	1	2	3	2	0	2	2	1	0	0	3	1	0
0	0	1	1	2	4	0	0	0	0	4	1	1	0	0	0	0	2	0	2	0	0	0	1	0	2	1	0	0	0	2	0	0	1	0	0	3	0	0	2	2	0	1	2	3	0	0	4	1	0
1	1	0	1	0	3	1	2	3	1	4	2	1	1	0	0	0	2	0	1	0	0	0	1	0	2	1	2	0	0	3	0	0	1	1	0	3	0	1	2	0	1	0	0	1	3	0	2	2	0
1	0	0	1	0	4	0	0	0	0	4	3	1	0	0	0	2	2	1	1	0	2	1	0	0	2	1	0	0	0	2	0	0	1	1	0	1	0	0	2	0	0	1	1	3	0	0	4	0	1
1	0	0	1	0	4	0	0	0	0	3	1	1	0	0	0	0	2	1	1	0	0	1	0	0	2	1	0	0	0	0	0	0	3	1	0	1	0	0	2	0	0	1	1	1	0	0	4	0	1
0	0	1	1	0	4	0	1	0	0	2	0	1	1	0	0	0	2	0	1	0	2	2	0	0	2	0	0	2	0	1	0	0	1	1	0	1	1	0	2	0	0	3	0	1	0	0	4	0	0
0	0	0	1	0	4	1	2	2	0	3	1	1	1	0	0	0	2	0	1	0	0	1	1	0	2	1	2	0	0	3	0	0	1	1	0	3	0	1	2	0	0	1	0	1	2	0	3	2	0
2	1	2	1	0	3	0	0	1	1	3	0	1	3	0	1	0	3	1	3	0	0	2	0	0	2	1	0	0	0	1	0	0	3	1	0	1	0	0	3	0	1	0	0	1	3	2	2	3	2
0	0	0	1	0	4	0	0	0	0	2	0	1	1	0	0	0	2	1	1	0	0	2	0	0	2	0	0	1	0	1	0	0	3	1	0	1	1	0	2	0	0	1	0	1	0	0	4	0	1
2	0	2	1	0	4	0	0	0	0	4	0	1	3	0	1	0	1	1	3	0	1	0	0	0	0	1	0	0	0	1	0	0	3	0	0	0	0	0	3	1	0	3	1	1	2	2	3	3	2
2	0	1	1	0	3	0	1	0	0	4	1	1	1	0	0	0	2	0	1	0	0	0	0	0	0	1	0	1	0	1	0	0	2	1	0	0	2	2	2	0	0	2	0	1	0	0	3	1	0
1	1	1	1	0	3	0	1	1	1	4	1	1	1	0	0	0	2	0	1	0	0	0	0	0	0	1	0	1	0	1	0	0	1	1	0	0	2	2	2	0	1	2	0	1	1	0	3	1	0
3	1	0	1	0	3	0	0	1	1	4	2	1	1	0	0	0	0	0	1	0	0	0	1	0	0	1	0	0	0	3	2	2	3	1	0	0	0	0	3	0	1	2	0	1	3	0	2	1	0
2	0	0	1	0	3	0	0	0	0	4	3	1	1	0	0	2	0	1	2	0	2	0	0	0	0	1	0	0	0	3	0	0	2	1	0	0	0	0	2	0	0	2	0	3	0	0	3	1	0
3	0	2	1	0	3	0	0	0	0	3	0	1	3	0	1	0	1	1	3	0	1	1	0	0	0	1	0	0	0	1	0	0	4	1	0	0	0	0	3	0	0	2	0	1	2	2	2	3	2
0	0	2	1	2	4	0	0	0	0	3	1	1	1	0	0	0	0	0	1	0	0	0	1	0	0	0	0	1	0	3	0	0	1	0	0	0	1	0	2	1	0	3	1	1	2	0	3	0	0
0	0	0	1	0	4	0	0	0	0	4	1	3	1	0	0	0	0	0	3	0	0	0	1	0	0	0	0	1	0	3	0	0	1	0	0	0	1	0	3	1	2	4	1	1	2	0	4	0	0
3	2	0	1	0	3	0	0	2	0	4	0	1	1	0	0	2	0	0	3	0	0	0	0	0	0	1	0	0	0	1	0	0	4	0	0	0	1	2	3	1	0	3	2	1	0	0	3	1	0
4	2	0	1	0	3	0	0	2	0	4	1	1	1	0	0	2	0	0	3	0	0	0	0	0	0	1	0	0	0	1	0	0	4	1	0	0	1	2	3	0	0	3	1	1	0	0	3	1	0
3	2	0	1	1	4	0	0	0	0	3	1	1	3	0	0	0	0	1	1	0	0	0	1	0	1	0	2	1	0	1	0	0	3	1	0	0	1	0	2	0	0	3	0	1	0	0	3	0	0
2	3	0	1	1	3	0	0	1	1	2	0	1	3	0	0	0	0	1	1	0	0	1	1	0	1	1	2	0	0	1	0	0	3	1	0	0	0	0	2	0	1	2	0	1	1	0	2	1	0
3	0	0	1	0	1	0	0	0	0	5	1	1	1	0	0	0	0	0	1	0	0	0	1	0	0	1	0	0	0	3	2	2	5	0	0	0	0	2	3	1	0	0	1	1	2	0	0	1	0
3	2	0	1	0	2	0	0	0	0	5	1	1	0	0	0	0	1	0	1	0	0	0	0	0	1	1	2	0	0	0	0	0	4	1	0	1	0	2	3	0	0	1	1	1	0	0	3	0	0
2	3	0	1	0	1	0	0	1	1	4	0	1	1	0	0	0	1	0	1	0	0	1	0	0	1	1	2	0	0	1	0	0	4	1	0	1	0	2	3	0	1	0	0	1	1	0	2	1	0
2	0	0	1	0	2	0	0	0	0	3	0	1	1	0	0	0	2	1	1	0	0	1	0	0	0	1	0	0	0	1	2	0	4	1	0	0	0	2	2	1	0	1	0	1	0	0	1	1	0
0	0	0	1	0	3	0	0	0	0	3	0	1	3	0	0	0	2	1	1	0	0	1	0	0	0	0	0	1	0	1	0	0	3	1	0	0	1	2	2	1	0	1	0	1	0	0	1	0	0
[truncated: 80 more columns]

## Sheet: Figure S8_GBT
0	1	2	3	4	5	6	7	8	9	10	11	12	13	14	15	16	17	18	19	20	21	22	23	24	25	26	27	28	29	30	31	32	33	34	35	36	37	38	39	40	41	42	43	44	45	46	47	48	49
0	0	0	1	0	4	0	0	0	0	3	0	1	2	0	0	0	3	1	1	0	0	1	0	0	2	1	0	0	0	0	0	0	1	0	0	1	0	0	2	1	0	1	2	1	0	0	3	0	1
1	0	0	1	0	4	1	0	0	0	3	3	1	1	0	0	2	2	0	1	0	0	0	1	0	2	1	0	0	0	3	0	0	1	1	0	1	0	1	2	0	0	1	0	1	2	0	3	2	0
3	3	1	1	1	3	1	0	1	1	3	1	1	3	0	0	0	2	0	1	0	0	0	1	0	3	1	2	0	0	1	0	0	3	1	0	1	0	0	2	0	1	0	0	1	1	0	2	1	0
2	0	0	1	0	4	1	0	0	0	3	1	1	1	0	0	0	2	0	1	0	0	1	1	0	2	0	0	1	0	3	2	2	3	1	0	1	1	1	3	0	0	1	0	1	2	0	3	1	0
2	0	0	1	0	4	1	0	0	0	3	1	1	0	0	0	0	2	0	1	0	0	1	1	0	2	1	0	0	0	2	2	2	3	1	0	1	0	1	3	0	0	1	1	1	2	0	3	1	0
0	0	1	1	0	4	0	1	0	0	2	0	1	0	0	0	0	2	0	1	0	2	2	0	0	2	1	0	1	0	0	0	0	1	1	0	1	0	0	2	0	0	3	1	1	0	0	4	0	0
0	0	0	1	0	4	1	2	2	0	3	1	1	1	0	0	0	2	0	1	0	0	1	1	0	2	0	2	1	0	3	0	0	1	1	0	3	1	1	2	0	0	1	0	1	2	0	3	1	0
1	0	0	1	0	3	0	0	0	0	2	0	1	3	0	0	0	3	1	1	0	0	2	0	0	2	1	0	0	0	1	0	0	2	1	0	1	0	0	2	0	0	0	0	1	0	0	2	1	1
1	0	1	1	0	3	0	1	0	0	4	0	1	1	0	0	0	2	0	1	0	0	0	0	0	0	1	0	1	0	1	0	0	2	0	0	0	2	2	2	1	0	2	1	1	0	0	3	1	0
1	2	0	1	2	3	0	0	0	0	4	0	1	1	0	0	0	0	1	3	0	0	0	0	0	1	1	2	0	0	3	0	0	4	1	0	0	0	0	2	1	0	2	1	1	2	0	3	3	0
4	0	0	1	0	3	0	0	0	0	4	2	1	1	0	0	0	0	0	1	0	0	0	1	0	0	1	0	0	0	3	2	2	4	1	0	0	0	0	3	0	0	2	0	1	2	0	2	1	0
1	1	0	1	0	3	0	0	1	1	4	3	1	1	0	0	2	0	1	2	0	2	0	0	0	0	1	0	0	0	3	0	0	1	1	0	0	0	0	2	0	1	2	0	3	1	0	3	1	0
1	0	0	1	0	4	0	0	0	0	4	3	1	0	0	0	2	0	1	2	0	2	0	0	0	0	1	0	0	0	2	0	0	1	1	0	0	0	0	2	0	0	3	1	3	0	0	4	0	0
3	2	0	1	0	4	0	0	2	0	4	1	1	0	0	0	2	0	0	3	0	0	0	0	0	0	1	0	0	0	0	0	0	3	1	0	0	1	2	3	0	0	4	2	1	0	0	4	0	0
2	2	0	1	0	2	0	0	0	0	4	0	1	1	0	0	0	1	0	1	0	0	1	0	0	1	1	2	0	0	1	0	0	4	1	0	1	0	2	3	0	0	1	0	1	0	0	3	1	0
1	0	1	1	0	1	0	1	0	0	3	0	1	1	0	0	0	2	0	1	0	0	1	0	0	0	1	0	1	0	1	0	0	4	1	0	0	2	3	2	0	0	0	0	1	0	0	2	1	0
0	0	1	1	0	2	0	1	0	0	3	0	1	1	0	0	0	2	0	1	0	0	1	0	0	0	0	0	2	0	1	0	0	3	1	0	0	3	3	2	0	0	1	0	1	0	0	3	0	0
0	2	0	1	2	2	0	0	0	0	4	0	1	1	0	0	0	0	0	3	0	0	1	0	0	1	0	2	1	0	3	0	0	4	2	0	0	1	2	2	0	0	1	0	1	2	0	3	2	0
2	0	2	1	0	2	0	0	0	0	4	0	1	2	0	1	0	2	1	3	0	1	1	0	0	0	1	0	0	0	0	0	0	4	1	0	0	0	2	3	1	0	1	1	1	2	2	1	2	2
0	1	0	1	0	1	0	0	1	1	4	0	1	1	0	0	0	2	1	1	0	0	0	0	0	0	1	0	0	0	1	0	0	3	0	0	0	2	3	2	3	1	0	1	1	1	0	2	1	0
1	0	0	1	0	3	0	0	0	0	4	1	1	1	0	0	0	1	1	1	0	0	0	0	0	0	1	0	0	0	1	0	0	4	1	0	0	0	2	2	1	0	1	0	1	0	0	3	1	0
1	0	0	1	0	3	0	0	0	0	4	1	1	0	0	0	0	1	1	1	0	0	0	0	0	0	1	0	0	0	0	0	0	4	1	0	0	0	2	2	1	0	1	1	1	0	0	3	0	0
0	0	0	1	0	3	0	0	0	0	3	0	1	1	0	0	0	1	1	1	0	0	1	0	0	0	1	0	0	0	1	0	0	4	1	0	0	0	2	2	1	0	1	0	1	0	0	3	1	0
0	0	0	1	0	4	0	0	0	0	3	0	1	3	0	0	0	3	1	1	0	0	1	0	0	2	0	0	1	0	1	0	0	1	0	0	1	1	0	2	1	0	1	1	1	0	0	3	0	1
2	3	1	1	1	3	1	0	1	1	3	0	1	3	0	0	0	2	0	1	0	0	0	1	0	3	1	2	0	0	1	0	0	3	0	0	1	0	0	2	1	1	0	1	1	1	0	2	1	0
1	0	0	1	0	4	0	0	0	0	3	1	1	3	0	0	0	3	1	1	0	0	1	0	0	2	0	0	1	0	1	0	0	1	1	0	1	1	0	2	0	0	1	0	1	0	0	3	0	1
2	0	0	1	0	3	1	0	0	0	3	3	1	1	0	0	2	2	0	1	0	0	0	1	0	2	1	0	0	0	3	0	0	2	1	0	1	0	1	2	0	0	0	0	1	2	0	2	2	0
2	0	2	1	0	4	0	0	0	0	3	0	1	3	0	1	0	3	1	3	0	0	2	0	0	2	1	0	0	0	1	0	0	3	1	0	1	0	0	3	0	0	1	0	1	2	2	3	3	2
0	0	0	1	0	4	0	0	0	0	2	0	1	1	0	0	0	2	1	1	0	0	2	0	0	2	1	0	0	0	1	0	0	3	1	0	1	0	0	2	0	0	1	0	1	0	0	4	1	1
2	2	0	1	0	4	0	0	0	0	4	0	1	0	0	0	0	1	0	1	0	0	0	0	0	1	1	2	0	0	0	0	0	3	0	0	0	0	0	3	1	0	3	2	1	0	0	4	0	0
3	2	0	1	0	4	0	0	0	0	4	1	1	1	0	0	0	1	0	1	0	0	0	0	0	1	0	2	1	0	1	0	0	3	1	0	0	1	0	3	0	0	3	0	1	0	0	4	0	0
1	0	1	1	0	4	0	1	0	0	4	1	1	0	0	0	0	2	0	1	0	0	0	0	0	0	1	0	1	0	0	0	0	1	1	0	0	2	2	2	0	0	3	1	1	0	0	4	0	0
3	0	0	1	0	4	0	0	0	0	4	2	1	1	0	0	0	0	0	1	0	0	0	1	0	0	1	0	0	0	3	2	2	3	1	0	0	0	0	3	0	0	3	0	1	2	0	3	1	0
3	0	0	1	0	4	0	0	0	0	4	2	1	1	0	0	0	0	0	1	0	0	0	1	0	0	0	0	1	0	3	2	2	3	1	0	0	1	0	3	0	0	3	0	1	2	0	3	0	0
0	2	0	1	2	4	0	0	0	0	3	0	1	1	0	0	0	0	1	3	0	0	1	0	0	1	0	2	1	0	3	0	0	3	2	0	0	1	0	2	0	0	3	0	1	2	0	4	2	0
2	0	2	1	0	4	0	0	0	0	3	0	1	3	0	1	0	1	1	3	0	1	1	0	0	0	0	0	1	0	1	0	0	3	1	0	0	1	0	3	0	0	3	0	1	2	2	3	2	2
2	2	0	1	0	4	0	0	2	0	4	0	1	1	0	0	2	0	0	3	0	0	0	0	0	0	1	0	0	0	1	0	0	3	0	0	0	1	2	3	1	0	4	2	1	0	0	4	1	0
0	1	0	1	2	3	0	0	1	1	3	1	1	1	0	0	0	0	0	1	0	0	0	1	0	0	1	0	0	0	3	0	0	1	0	0	0	0	0	3	1	1	2	1	1	3	0	2	1	0
1	0	0	1	0	4	0	0	0	0	4	2	3	0	0	0	0	0	0	3	0	0	0	1	0	0	1	0	0	0	2	0	0	1	1	0	0	0	0	3	0	2	4	1	1	2	0	4	0	0
1	0	0	1	0	3	0	0	0	0	3	1	3	1	0	0	0	0	0	3	0	0	1	1	0	0	1	0	0	0	3	0	0	2	1	0	0	0	0	3	0	2	3	0	1	2	0	3	1	0
2	2	0	1	0	4	0	0	2	0	3	0	1	1	0	0	2	0	0	3	0	0	1	0	0	0	0	0	1	0	1	0	0	3	1	0	0	2	2	3	0	0	4	1	1	0	0	4	0	0
2	0	0	1	0	2	0	0	0	0	4	0	1	1	0	0	0	2	1	1	0	0	0	0	0	0	1	0	0	0	1	2	0	4	0	0	0	0	2	2	2	0	1	1	1	0	0	1	1	0
3	0	0	1	0	1	0	0	0	0	4	0	1	3	0	0	0	2	1	1	0	0	0	0	0	0	1	0	0	0	1	0	0	5	0	0	0	0	2	2	2	0	0	1	1	0	0	0	1	0
3	1	0	1	0	1	0	0	1	1	4	1	1	3	0	0	0	2	1	1	0	0	0	0	0	0	1	0	0	0	1	0	0	4	1	0	0	0	2	2	1	1	0	0	1	1	0	0	1	0
0	2	0	1	2	4	0	0	0	0	4	0	1	1	0	0	0	0	1	3	0	0	0	0	0	1	1	2	0	0	3	0	0	3	1	0	0	0	0	2	1	0	3	1	1	2	0	4	3	0
2	0	2	1	0	4	0	0	0	0	4	0	1	3	0	1	0	1	1	3	0	1	0	0	0	0	0	0	1	0	1	0	0	3	0	0	0	1	0	3	1	0	3	1	1	2	2	3	2	2
1	0	1	1	0	4	0	1	0	0	4	1	1	1	0	0	0	2	0	1	0	0	0	0	0	0	1	0	1	0	1	0	0	1	1	0	0	2	2	2	0	0	3	0	1	0	0	4	1	0
0	0	1	1	0	4	0	1	0	0	3	0	1	1	0	0	0	2	0	1	0	0	1	0	0	0	1	0	1	0	1	0	0	1	1	0	0	2	2	2	0	0	3	0	1	0	0	4	1	0
0	0	0	1	0	4	0	0	0	0	3	2	1	0	0	0	2	0	1	2	0	2	1	0	0	0	1	0	0	0	2	0	0	1	1	0	0	0	0	2	0	0	3	1	3	0	0	4	0	0
1	1	2	1	2	3	0	0	1	1	3	2	1	1	0	0	0	0	0	1	0	0	0	1	0	0	1	0	0	0	3	0	0	1	1	0	0	0	0	2	0	1	2	0	1	3	0	2	1	0
1	0	2	1	2	4	0	0	0	0	3	2	1	1	0	0	0	0	0	1	0	0	0	1	0	0	0	0	1	0	3	0	0	1	1	0	0	1	0	2	0	0	3	0	1	2	0	3	0	0
1	0	0	1	2	4	0	0	0	0	3	2	1	1	0	0	0	0	0	1	0	0	0	1	0	0	0	0	1	0	3	0	0	1	1	0	0	1	0	3	0	0	3	0	1	2	0	3	0	0
2	2	0	1	1	4	0	0	0	0	2	0	1	2	0	0	0	0	1	1	0	0	1	1	0	1	1	2	0	0	0	0	0	3	1	0	0	0	0	2	0	0	3	1	1	0	0	3	0	0
2	2	0	1	0	2	0	0	0	0	5	0	1	0	0	0	0	1	0	1	0	0	0	0	0	1	1	2	0	0	0	0	0	4	0	0	1	0	2	3	1	0	1	2	1	0	0	3	0	0
1	1	1	1	0	1	0	1	1	1	4	1	1	1	0	0	0	2	0	1	0	0	0	0	0	0	1	0	1	0	1	0	0	3	1	0	0	2	3	2	0	1	0	0	1	1	0	2	1	0
3	1	0	1	0	1	0	0	1	1	5	2	1	1	0	0	0	0	0	1	0	0	0	1	0	0	1	0	0	0	3	2	2	4	1	0	0	0	2	3	0	1	0	0	1	3	0	0	1	0
1	1	0	1	0	2	0	0	1	1	5	3	1	1	0	0	2	1	1	1	0	2	0	0	0	0	1	0	0	0	3	0	0	3	1	0	0	0	2	2	1	1	0	0	3	1	0	2	1	0
0	1	1	1	0	1	0	1	1	1	3	0	1	1	0	0	0	2	0	1	0	0	1	0	0	0	1	0	1	0	1	0	0	3	1	0	0	2	3	2	0	1	0	0	1	1	0	2	1	0
0	1	0	1	0	2	0	0	1	1	4	0	1	3	0	0	0	2	1	1	0	0	0	0	0	0	1	0	0	0	1	0	0	3	0	0	0	0	2	2	2	1	0	1	1	1	0	0	1	0
2	0	0	1	0	2	0	0	0	0	4	0	1	3	0	0	0	2	1	1	0	0	0	0	0	0	0	0	1	0	1	0	0	4	0	0	0	1	2	2	2	0	1	1	1	0	0	1	0	0
2	1	0	1	0	1	0	0	1	1	3	0	1	1	0	0	0	2	1	1	0	0	1	0	0	0	1	0	0	0	1	2	0	4	1	0	0	0	2	2	1	1	0	0	1	1	0	0	1	0
0	0	1	1	0	4	0	1	0	0	3	0	1	1	0	0	0	2	0	1	0	2	1	0	0	2	0	0	2	0	1	0	0	1	0	0	1	1	0	2	1	0	3	1	1	0	0	4	0	0
0	0	0	1	0	4	1	2	2	0	4	1	1	1	0	0	0	2	0	1	0	0	0	1	0	2	0	2	1	0	3	0	0	1	0	0	3	1	1	2	1	0	1	1	1	2	0	3	1	0
2	2	1	1	2	3	1	0	0	0	4	1	1	1	0	0	0	2	0	3	0	0	0	0	0	3	1	2	0	0	3	0	0	4	2	0	1	0	0	2	0	0	0	0	1	2	0	3	3	0
1	0	0	1	0	3	1	2	2	0	3	1	1	1	0	0	0	2	0	1	0	0	1	1	0	2	1	2	0	0	3	0	0	2	1	0	3	0	1	2	0	0	0	0	1	2	0	2	2	0
0	1	0	1	0	3	0	0	1	1	3	2	1	1	0	0	2	2	1	1	0	2	2	0	0	2	1	0	0	0	3	0	0	1	1	0	1	0	0	2	0	1	0	0	3	1	0	3	1	1
2	0	0	1	0	4	0	0	0	0	2	0	1	1	0	0	0	3	1	1	0	0	2	0	0	2	0	0	1	0	1	2	0	3	1	0	1	1	0	2	0	0	1	0	1	0	0	3	0	1
0	1	0	1	0	3	0	0	1	1	2	0	1	1	0	0	0	2	1	1	0	0	2	0	0	2	1	0	0	0	1	0	0	3	1	0	1	0	0	2	0	1	0	0	1	1	0	3	1	1
0	0	1	1	2	4	0	0	0	0	3	1	1	0	0	0	0	2	0	2	0	0	1	1	0	2	1	0	0	0	2	0	0	1	1	0	3	0	0	2	1	0	1	1	3	0	0	4	1	0
0	0	2	1	2	4	0	0	0	0	3	1	1	0	0	0	0	0	0	1	0	0	0	1	0	0	1	0	0	0	2	0	0	1	0	0	0	0	0	2	1	0	3	2	1	2	0	3	0	0
1	0	0	1	2	3	0	0	0	0	3	1	1	1	0	0	0	0	0	1	0	0	0	1	0	0	1	0	0	0	3	0	0	2	0	0	0	0	0	3	1	0	2	1	1	2	0	2	1	0
0	0	0	1	2	4	0	0	0	0	3	1	1	0	0	0	0	0	0	1	0	0	0	1	0	0	1	0	0	0	2	0	0	1	0	0	0	0	0	3	1	0	3	2	1	2	0	3	0	0
2	3	0	1	1	3	0	0	1	1	3	0	1	3	0	0	0	0	1	1	0	0	0	1	0	1	1	2	0	0	1	0	0	3	0	0	0	0	0	2	1	1	2	1	1	1	0	2	1	0
2	2	0	1	1	4	0	0	0	0	3	0	1	2	0	0	0	0	1	1	0	0	0	1	0	1	1	2	0	0	0	0	0	3	0	0	0	0	0	2	1	0	3	2	1	0	0	3	0	0
0	0	0	1	0	4	0	0	0	0	3	1	3	1	0	0	0	0	0	3	0	0	1	1	0	0	1	0	0	0	3	0	0	1	1	0	0	0	0	3	0	2	4	0	1	2	0	4	1	0
2	3	0	1	0	1	0	0	1	1	5	0	1	1	0	0	0	1	0	1	0	0	0	0	0	1	1	2	0	0	1	0	0	4	0	0	1	0	2	3	1	1	0	1	1	1	0	2	1	0
0	1	1	1	0	1	0	1	1	1	4	0	1	1	0	0	0	2	0	1	0	0	0	0	0	0	1	0	1	0	1	0	0	3	0	0	0	2	3	2	1	1	0	1	1	1	0	2	1	0
1	0	0	1	0	2	0	0	0	0	5	2	1	1	0	0	2	1	1	1	0	2	0	0	0	0	1	0	0	0	3	0	0	4	0	0	0	0	2	2	2	0	0	1	3	0	0	2	1	0
3	0	2	1	0	2	0	0	0	0	5	1	1	3	0	1	0	2	1	3	0	1	0	0	0	0	0	0	1	0	1	0	0	4	1	0	0	1	2	3	1	0	1	0	1	2	2	1	2	2
2	0	0	1	0	2	0	0	0	0	4	1	1	0	0	0	0	0	0	1	0	0	1	1	0	0	1	0	0	0	2	2	2	4	1	0	0	0	2	3	0	0	1	1	1	2	0	1	0	0
2	1	2	1	0	1	0	0	1	1	4	0	1	3	0	1	0	2	1	3	0	1	1	0	0	0	1	0	0	0	1	0	0	4	1	0	0	0	2	3	1	1	0	0	1	3	2	0	3	2
0	0	0	1	0	2	0	0	0	0	3	0	1	1	0	0	0	2	1	1	0	0	1	0	0	0	1	0	0	0	1	0	0	3	1	0	0	2	3	2	2	0	1	0	1	0	0	3	1	0
0	2	1	1	2	4	1	0	0	0	4	0	1	1	0	0	0	2	0	3	0	0	0	0	0	3	1	2	0	0	3	0	0	3	1	0	1	0	0	2	1	0	1	1	1	2	0	4	3	0
0	0	1	1	0	4	0	1	0	0	3	0	1	0	0	0	0	2	0	1	0	2	1	0	0	2	1	0	1	0	0	0	0	1	0	0	1	0	0	2	1	0	3	2	1	0	0	4	0	0
0	0	0	1	0	4	1	2	2	0	4	1	1	1	0	0	0	2	0	1	0	0	0	1	0	2	1	2	0	0	3	0	0	1	0	0	3	0	1	2	1	0	1	1	1	2	0	3	2	0
2	2	1	1	1	4	1	0	0	0	3	0	1	3	0	0	0	2	0	1	0	0	0	1	0	3	0	2	1	0	1	0	0	3	0	0	1	1	0	2	1	0	1	1	1	0	0	3	0	0
0	0	1	1	2	4	0	0	0	0	4	1	1	1	0	0	0	2	0	2	0	0	0	1	0	2	1	0	0	0	3	0	0	1	0	0	3	0	0	2	2	0	1	1	3	0	0	4	2	0
1	0	1	1	0	4	0	1	0	0	3	1	1	1	0	0	0	2	0	1	0	2	1	0	0	2	1	0	1	0	1	0	0	1	1	0	1	0	0	2	0	0	3	0	1	0	0	4	1	0
1	0	0	1	0	4	0	0	0	0	4	3	1	1	0	0	2	2	1	1	0	2	1	0	0	2	1	0	0	0	3	0	0	1	1	0	1	0	0	2	0	0	1	0	3	0	0	4	1	1
1	0	0	1	0	4	1	0	0	0	4	2	3	1	0	0	0	2	0	3	0	0	0	1	0	2	1	0	0	0	3	0	0	1	1	0	1	0	1	3	0	2	3	0	1	2	0	4	2	0
3	3	0	1	0	3	0	0	3	1	4	1	1	1	0	0	2	2	0	3	0	0	1	0	0	2	1	0	0	0	1	0	0	3	1	0	1	1	2	3	1	1	2	1	1	1	0	3	1	0
0	0	0	1	0	4	0	0	0	0	3	2	1	0	0	0	2	2	1	1	0	2	2	0	0	2	1	0	0	0	2	0	0	1	1	0	1	0	0	2	0	0	1	1	3	0	0	4	0	1
3	0	2	1	0	3	0	0	0	0	3	0	1	3	0	1	0	3	1	3	0	0	2	0	0	2	1	0	0	0	1	0	0	4	1	0	1	0	0	3	0	0	0	0	1	2	2	2	3	2
2	0	0	1	0	4	0	0	0	0	4	1	1	1	0	0	0	0	0	1	0	0	0	1	0	0	0	0	1	0	3	2	2	3	0	0	0	1	0	3	1	0	3	1	1	2	0	3	0	0
0	3	0	1	2	3	0	0	1	1	4	0	1	1	0	0	0	0	1	3	0	0	0	0	0	1	1	2	0	0	3	0	0	3	1	0	0	0	0	2	1	1	2	1	1	3	0	3	3	0
2	1	2	1	0	3	0	0	1	1	4	0	1	3	0	1	0	1	1	3	0	1	0	0	0	0	1	0	0	0	1	0	0	3	0	0	0	0	0	3	1	1	2	1	1	3	2	2	3	2
1	0	0	1	0	4	0	0	0	0	4	3	1	1	0	0	2	0	1	2	0	2	0	0	0	0	1	0	0	0	3	0	0	1	1	0	0	0	0	2	0	0	3	0	3	0	0	4	1	0
0	1	1	1	0	3	0	1	1	1	3	0	1	1	0	0	0	2	0	1	0	0	1	0	0	0	1	0	1	0	1	0	0	1	1	0	0	2	2	2	0	1	2	0	1	1	0	3	1	0
2	0	2	1	2	3	0	0	0	0	3	2	1	1	0	0	0	0	0	1	0	0	0	1	0	0	1	0	0	0	3	0	0	2	1	0	0	0	0	2	0	0	2	0	1	2	0	2	1	0
0	0	2	1	2	4	0	0	0	0	2	1	1	0	0	0	0	0	0	1	0	0	1	1	0	0	1	0	0	0	2	0	0	1	1	0	0	0	0	2	0	0	3	1	1	2	0	3	0	0
2	0	0	1	0	2	0	0	0	0	5	1	1	0	0	0	0	0	0	1	0	0	0	1	0	0	1	0	0	0	2	2	2	4	0	0	0	0	2	3	1	0	1	2	1	2	0	1	0	0
0	1	0	1	0	2	0	0	1	1	5	2	1	1	0	0	2	1	1	1	0	2	0	0	0	0	1	0	0	0	3	0	0	3	0	0	0	0	2	2	2	1	0	1	3	1	0	2	1	0
2	1	2	1	0	1	0	0	1	1	5	0	1	3	0	1	0	2	1	3	0	1	0	0	0	0	1	0	0	0	1	0	0	4	0	0	0	0	2	3	2	1	0	1	1	3	2	0	3	2
4	0	0	1	0	1	0	0	0	0	5	2	1	1	0	0	0	0	0	1	0	0	0	1	0	0	1	0	0	0	3	2	2	5	1	0	0	0	2	3	0	0	0	0	1	2	0	0	1	0
1	3	0	1	2	1	0	0	1	1	5	1	1	1	0	0	0	0	0	3	0	0	0	0	0	1	1	2	0	0	3	0	0	4	2	0	0	0	2	2	0	1	0	0	1	3	0	2	3	0
1	2	0	1	2	1	0	0	0	0	4	0	1	1	0	0	0	0	0	3	0	0	1	0	0	1	1	2	0	0	3	0	0	5	2	0	0	0	2	2	0	0	0	0	1	2	0	2	3	0
0	0	0	1	0	3	0	0	0	0	4	0	1	3	0	0	0	2	1	1	0	0	0	0	0	0	1	0	0	0	1	0	0	3	0	0	0	0	2	2	2	0	1	1	1	0	0	1	1	0
0	0	1	1	0	4	0	1	0	0	3	0	1	0	0	0	0	3	0	1	0	0	1	0	0	2	1	0	1	0	0	0	0	1	0	0	1	2	2	2	1	0	1	2	1	0	0	4	0	0
1	0	0	1	0	3	1	0	0	0	4	1	3	1	0	0	0	2	0	3	0	0	0	1	0	2	1	0	0	0	3	0	0	2	0	0	1	0	1	3	1	2	2	1	1	2	0	3	2	0
0	0	0	1	0	4	1	0	0	0	4	1	3	1	0	0	0	2	0	3	0	0	0	1	0	2	0	0	1	0	3	0	0	1	0	0	1	1	1	3	1	2	3	1	1	2	0	4	1	0
3	2	1	1	1	3	1	0	0	0	3	0	1	3	0	0	0	2	0	1	0	0	0	1	0	3	1	2	0	0	1	0	0	4	0	0	1	0	0	2	1	0	0	1	1	0	0	2	1	0
0	0	1	1	2	4	0	0	0	0	4	1	1	1	0	0	0	2	0	2	0	0	0	1	0	2	0	0	1	0	3	0	0	1	0	0	3	1	0	2	2	0	1	1	3	0	0	4	1	0
4	0	0	1	0	3	1	0	0	0	4	2	1	1	0	0	0	2	0	1	0	0	0	1	0	2	1	0	0	0	3	2	2	4	1	0	1	0	1	3	0	0	0	0	1	2	0	2	2	0
1	0	0	1	0	4	1	2	2	0	4	2	1	0	0	0	0	2	0	1	0	0	0	1	0	2	1	2	0	0	2	0	0	1	1	0	3	0	1	2	0	0	1	1	1	2	0	3	1	0
1	2	1	1	2	4	1	0	0	0	4	1	1	0	0	0	0	2	0	3	0	0	0	0	0	3	1	2	0	0	2	0	0	3	2	0	1	0	0	2	0	0	1	1	1	2	0	4	2	0
3	0	2	1	0	4	0	0	0	0	4	1	1	2	0	1	0	3	1	3	0	0	1	0	0	2	1	0	0	0	0	0	0	3	1	0	1	0	0	3	0	0	1	1	1	2	2	3	2	2
3	2	1	1	1	4	1	0	0	0	3	1	1	3	0	0	0	2	0	1	0	0	0	1	0	3	1	2	0	0	1	0	0	3	1	0	1	0	0	2	0	0	1	0	1	0	0	3	1	0
0	0	0	1	0	4	0	0	0	0	3	2	1	1	0	0	2	2	1	1	0	2	2	0	0	2	0	0	1	0	3	0	0	1	1	0	1	1	0	2	0	0	1	0	3	0	0	4	0	1
0	2	1	1	2	4	1	0	0	0	3	0	1	1	0	0	0	2	0	3	0	0	1	0	0	3	1	2	0	0	3	0	0	3	2	0	1	0	0	2	0	0	1	0	1	2	0	4	3	0
2	1	0	1	0	3	0	0	1	1	2	0	1	1	0	0	0	3	1	1	0	0	2	0	0	2	1	0	0	0	1	2	0	3	1	0	1	0	0	2	0	1	0	0	1	1	0	2	1	1
2	0	0	1	0	4	0	0	0	0	2	0	1	0	0	0	0	3	1	1	0	0	2	0	0	2	1	0	0	0	0	2	0	3	1	0	1	0	0	2	0	0	1	1	1	0	0	3	0	1
0	0	0	1	0	4	0	0	0	0	4	2	1	1	0	0	2	0	1	2	0	2	0	0	0	0	0	0	1	0	3	0	0	1	0	0	0	1	0	2	1	0	3	1	3	0	0	4	0	0
1	2	0	1	2	4	0	0	0	0	4	1	1	1	0	0	0	0	1	3	0	0	0	0	0	1	0	2	1	0	3	0	0	3	2	0	0	1	0	2	0	0	3	0	1	2	0	4	2	0
3	2	0	1	1	3	0	0	0	0	3	0	1	3	0	0	0	0	1	1	0	0	0	1	0	1	1	2	0	0	1	0	0	4	0	0	0	0	0	2	1	0	2	1	1	0	0	2	1	0
1	0	2	1	2	4	0	0	0	0	3	2	1	0	0	0	0	0	0	1	0	0	0	1	0	0	1	0	0	0	2	0	0	1	1	0	0	0	0	2	0	0	3	1	1	2	0	3	0	0
1	1	0	1	0	3	0	0	1	1	4	2	3	1	0	0	0	0	0	3	0	0	0	1	0	0	1	0	0	0	3	0	0	1	1	0	0	0	0	3	0	3	3	0	1	3	0	3	1	0
3	2	0	1	0	4	0	0	2	0	4	1	1	1	0	0	2	0	0	3	0	0	0	0	0	0	1	0	0	0	1	0	0	3	1	0	0	1	2	3	0	0	4	1	1	0	0	4	1	0
2	2	0	1	2	1	0	0	0	0	5	1	1	1	0	0	0	0	0	3	0	0	0	0	0	1	1	2	0	0	3	0	0	5	2	0	0	0	2	2	0	0	0	0	1	2	0	2	3	0
3	0	2	1	0	2	0	0	0	0	5	1	1	2	0	1	0	2	1	3	0	1	0	0	0	0	1	0	0	0	0	0	0	4	1	0	0	0	2	3	1	0	1	1	1	2	2	1	2	2
2	2	0	1	0	2	0	0	0	0	4	0	1	0	0	0	0	1	0	1	0	0	1	0	0	1	1	2	0	0	0	0	0	4	1	0	1	0	2	3	0	0	1	1	1	0	0	3	0	0
2	0	0	1	0	2	0	0	0	0	4	0	1	1	0	0	0	2	1	1	0	0	0	0	0	0	0	0	1	0	1	2	0	4	0	0	0	1	2	2	2	0	1	1	1	0	0	1	0	0
1	1	0	1	0	2	0	0	1	1	4	1	1	3	0	0	0	2	1	1	0	0	0	0	0	0	1	0	0	0	1	0	0	3	1	0	0	0	2	2	1	1	0	0	1	1	0	0	1	0
3	0	0	1	0	2	0	0	0	0	4	1	1	3	0	0	0	2	1	1	0	0	0	0	0	0	0	0	1	0	1	0	0	4	1	0	0	1	2	2	1	0	1	0	1	0	0	1	0	0
1	2	1	1	2	3	1	0	0	0	4	0	1	1	0	0	0	2	0	3	0	0	0	0	0	3	1	2	0	0	3	0	0	4	1	0	1	0	0	2	1	0	0	1	1	2	0	3	3	0
1	0	0	1	0	3	1	2	2	0	4	1	1	1	0	0	0	2	0	1	0	0	0	1	0	2	1	2	0	0	3	0	0	2	0	0	3	0	1	2	1	0	0	1	1	2	0	2	2	0
0	0	0	1	0	4	1	0	0	0	3	2	1	1	0	0	2	2	0	1	0	0	0	1	0	2	1	0	0	0	3	0	0	1	0	0	1	0	1	2	1	0	1	1	1	2	0	3	2	0
2	3	0	1	0	3	0	0	3	1	4	0	1	1	0	0	2	2	0	3	0	0	1	0	0	2	1	0	0	0	1	0	0	3	0	0	1	1	2	3	2	1	2	2	1	1	0	3	1	0
1	3	1	1	2	3	1	0	1	1	4	1	1	1	0	0	0	2	0	3	0	0	0	0	0	3	1	2	0	0	3	0	0	3	2	0	1	0	0	2	0	1	0	0	1	3	0	3	3	0
1	0	0	1	0	4	0	0	0	0	3	1	1	3	0	0	0	3	1	1	0	0	1	0	0	2	1	0	0	0	1	0	0	1	1	0	1	0	0	2	0	0	1	0	1	0	0	3	1	1
4	0	0	1	0	3	0	0	0	0	3	1	1	3	0	0	0	3	1	1	0	0	1	0	0	2	1	0	0	0	1	0	0	4	1	0	1	0	0	2	0	0	0	0	1	0	0	2	1	1
3	0	0	1	0	3	1	0	0	0	3	1	1	1	0	0	0	2	0	1	0	0	1	1	0	2	1	0	0	0	3	2	2	4	1	0	1	0	1	3	0	0	0	0	1	2	0	2	2	0
0	0	0	1	0	4	0	0	0	0	2	0	1	0	0	0	0	2	1	1	0	0	2	0	0	2	1	0	0	0	0	0	0	3	1	0	1	0	0	2	0	0	1	1	1	0	0	4	0	1
0	0	0	1	0	4	1	0	0	0	3	1	3	0	0	0	0	2	0	3	0	0	1	1	0	2	1	0	0	0	2	0	0	1	1	0	1	0	1	3	0	2	3	1	1	2	0	4	1	0
0	0	1	1	2	4	0	0	0	0	3	1	1	1	0	0	0	2	0	2	0	0	1	1	0	2	0	0	1	0	3	0	0	1	1	0	3	1	0	2	1	0	1	0	3	0	0	4	1	0
0	2	0	1	2	4	0	0	0	0	4	0	1	0	0	0	0	0	1	3	0	0	0	0	0	1	1	2	0	0	2	0	0	3	1	0	0	0	0	2	1	0	3	2	1	2	0	4	2	0
0	1	0	1	0	3	0	0	1	1	4	1	3	1	0	0	0	0	0	3	0	0	0	1	0	0	1	0	0	0	3	0	0	1	0	0	0	0	0	3	1	3	3	1	1	3	0	3	1	0
2	2	0	1	0	4	0	0	2	0	4	0	1	0	0	0	2	0	0	3	0	0	0	0	0	0	1	0	0	0	0	0	0	3	0	0	0	1	2	3	1	0	4	3	1	0	0	4	0	0
1	0	0	1	0	4	0	0	0	0	4	2	3	1	0	0	0	0	0	3	0	0	0	1	0	0	0	0	1	0	3	0	0	1	1	0	0	1	0	3	0	2	4	0	1	2	0	4	0	0
2	2	0	1	0	2	0	0	0	0	5	0	1	1	0	0	0	1	0	1	0	0	0	0	0	1	1	2	0	0	1	0	0	4	0	0	1	0	2	3	1	0	1	1	1	0	0	3	1	0
0	2	0	1	2	2	0	0	0	0	5	0	1	1	0	0	0	0	0	3	0	0	0	0	0	1	1	2	0	0	3	0	0	4	1	0	0	0	2	2	1	0	1	1	1	2	0	3	3	0
2	0	2	1	0	2	0	0	0	0	5	0	1	3	0	1	0	2	1	3	0	1	0	0	0	0	0	0	1	0	1	0	0	4	0	0	0	1	2	3	2	0	1	1	1	2	2	1	2	2
1	0	0	1	0	3	0	0	0	0	5	3	1	1	0	0	2	1	1	1	0	2	0	0	0	0	1	0	0	0	3	0	0	3	1	0	0	0	2	2	1	0	1	0	3	0	0	3	1	0
1	2	0	1	2	2	0	0	0	0	5	1	1	1	0	0	0	0	0	3	0	0	0	0	0	1	1	2	0	0	3	0	0	4	2	0	0	0	2	2	0	0	1	0	1	2	0	3	3	0
0	0	0	1	0	2	0	0	0	0	4	0	1	0	0	0	0	2	1	1	0	0	0	0	0	0	1	0	0	0	0	0	0	3	0	0	0	2	3	2	3	0	1	2	1	0	0	3	0	0
2	0	0	1	0	2	0	0	0	0	3	0	1	1	0	0	0	2	1	1	0	0	1	0	0	0	0	0	1	0	1	2	0	4	1	0	0	1	2	2	1	0	1	0	1	0	0	1	0	0
2	0	0	1	0	2	0	0	0	0	3	0	1	0	0	0	0	2	1	1	0	0	1	0	0	0	1	0	0	0	0	2	0	4	1	0	0	0	2	2	1	0	1	1	1	0	0	1	0	0
0	0	0	1	0	4	0	0	0	0	4	2	1	0	0	0	2	2	1	1	0	2	1	0	0	2	1	0	0	0	2	0	0	1	0	0	1	0	0	2	1	0	1	2	3	0	0	4	0	1
0	0	0	1	0	4	1	0	0	0	3	2	1	0	0	0	2	2	0	1	0	0	0	1	0	2	1	0	0	0	2	0	0	1	0	0	1	0	1	2	1	0	1	2	1	2	0	3	1	0
0	1	0	1	0	3	1	0	1	1	4	1	3	1	0	0	0	2	0	3	0	0	0	1	0	2	1	0	0	0	3	0	0	1	0	0	1	0	1	3	1	3	2	1	1	3	0	3	2	0
1	0	0	1	0	4	0	0	0	0	4	3	1	1	0	0	2	2	1	1	0	2	1	0	0	2	0	0	1	0	3	0	0	1	1	0	1	1	0	2	0	0	1	0	3	0	0	4	0	1
0	0	0	1	0	4	1	2	2	0	3	1	1	0	0	0	0	2	0	1	0	0	1	1	0	2	1	2	0	0	2	0	0	1	1	0	3	0	1	2	0	0	1	1	1	2	0	3	1	0
2	1	0	1	0	3	0	0	1	1	2	0	1	3	0	0	0	3	1	1	0	0	2	0	0	2	1	0	0	0	1	0	0	3	1	0	1	0	0	2	0	1	0	0	1	1	0	2	1	1
2	0	0	1	0	4	0	0	0	0	2	0	1	3	0	0	0	3	1	1	0	0	2	0	0	2	0	0	1	0	1	0	0	3	1	0	1	1	0	2	0	0	1	0	1	0	0	3	0	1
0	0	0	1	0	4	1	0	0	0	2	2	1	1	0	0	2	2	0	1	0	0	1	1	0	2	0	0	1	0	3	0	0	1	1	0	1	1	1	2	0	0	1	0	1	2	0	3	1	0
1	0	0	1	0	3	0	0	0	0	4	2	1	1	0	0	2	0	1	2	0	2	0	0	0	0	1	0	0	0	3	0	0	2	0	0	0	0	0	2	1	0	2	1	3	0	0	3	1	0
3	2	0	1	0	4	0	0	0	0	4	1	1	0	0	0	0	1	0	1	0	0	0	0	0	1	1	2	0	0	0	0	0	3	1	0	0	0	0	3	0	0	3	1	1	0	0	4	0	0
1	0	1	1	0	4	0	1	0	0	4	1	1	1	0	0	0	2	0	1	0	0	0	0	0	0	0	0	2	0	1	0	0	1	1	0	0	3	2	2	0	0	3	0	1	0	0	4	0	0
3	0	2	1	0	4	0	0	0	0	4	1	1	2	0	1	0	1	1	3	0	1	0	0	0	0	1	0	0	0	0	0	0	3	1	0	0	0	0	3	0	0	3	1	1	2	2	3	2	2
0	2	0	1	2	4	0	0	0	0	3	0	1	1	0	0	0	0	1	3	0	0	1	0	0	1	1	2	0	0	3	0	0	3	2	0	0	0	0	2	0	0	3	0	1	2	0	4	3	0
1	0	2	1	2	3	0	0	0	0	3	1	1	1	0	0	0	0	0	1	0	0	0	1	0	0	1	0	0	0	3	0	0	2	0	0	0	0	0	2	1	0	2	1	1	2	0	2	1	0
2	2	0	1	0	4	0	0	2	0	4	0	1	1	0	0	2	0	0	3	0	0	0	0	0	0	0	0	1	0	1	0	0	3	0	0	0	2	2	3	1	0	4	2	1	0	0	4	0	0
1	0	2	1	2	4	0	0	0	0	3	2	1	1	0	0	0	0	0	1	0	0	0	1	0	0	1	0	0	0	3	0	0	1	1	0	0	0	0	2	0	0	3	0	1	2	0	3	1	0
3	2	0	1	0	4	0	0	2	0	4	1	1	1	0	0	2	0	0	3	0	0	0	0	0	0	0	0	1	0	1	0	0	3	1	0	0	2	2	3	0	0	4	1	1	0	0	4	0	0
1	1	0	1	2	3	0	0	1	1	3	2	1	1	0	0	0	0	0	1	0	0	0	1	0	0	1	0	0	0	3	0	0	1	1	0	0	0	0	3	0	1	2	0	1	3	0	2	1	0
3	2	0	1	1	4	0	0	0	0	3	1	1	2	0	0	0	0	1	1	0	0	0	1	0	1	1	2	0	0	0	0	0	3	1	0	0	0	0	2	0	0	3	1	1	0	0	3	0	0
1	0	2	1	2	3	0	0	0	0	2	1	1	1	0	0	0	0	0	1	0	0	1	1	0	0	1	0	0	0	3	0	0	2	1	0	0	0	0	2	0	0	2	0	1	2	0	2	1	0
0	0	1	1	0	2	0	1	0	0	3	0	1	1	0	0	0	2	0	1	0	0	1	0	0	0	1	0	1	0	1	0	0	3	1	0	0	2	3	2	0	0	1	0	1	0	0	3	1	0
2	0	2	1	0	2	0	0	0	0	4	0	1	3	0	1	0	2	1	3	0	1	1	0	0	0	0	0	1	0	1	0	0	4	1	0	0	1	2	3	1	0	1	0	1	2	2	1	2	2
1	0	0	1	0	3	0	0	0	0	4	1	1	3	0	0	0	2	1	1	0	0	0	0	0	0	0	0	1	0	1	0	0	3	1	0	0	1	2	2	1	0	1	0	1	0	0	1	0	0
1	1	0	1	0	2	0	0	1	1	4	1	1	1	0	0	0	1	1	1	0	0	0	0	0	0	1	0	0	0	1	0	0	4	1	0	0	0	2	2	1	1	0	0	1	1	0	2	1	0
2	0	0	1	0	1	0	0	0	0	4	1	1	1	0	0	0	2	1	1	0	0	0	0	0	0	1	0	0	0	1	0	0	4	1	0	0	2	3	2	2	0	0	0	1	0	0	2	1	0
2	1	0	1	0	1	0	0	1	1	3	0	1	3	0	0	0	2	1	1	0	0	1	0	0	0	1	0	0	0	1	0	0	4	1	0	0	0	2	2	1	1	0	0	1	1	0	0	1	0
2	1	0	1	0	3	0	0	1	1	3	0	1	3	0	0	0	3	1	1	0	0	1	0	0	2	1	0	0	0	1	0	0	3	0	0	1	0	0	2	1	1	0	1	1	1	0	2	1	1
0	0	0	1	2	4	1	0	0	0	3	1	1	1	0	0	0	2	0	1	0	0	0	1	0	2	0	0	1	0	3	0	0	1	0	0	1	1	1	3	1	0	1	1	1	2	0	3	1	0
1	0	0	1	0	4	0	0	0	0	3	1	1	1	0	0	0	2	1	1	0	0	1	0	0	2	0	0	1	0	1	0	0	3	1	0	1	1	0	2	0	0	1	0	1	0	0	4	0	1
2	0	0	1	0	4	0	0	0	0	4	1	1	1	0	0	0	0	0	1	0	0	0	1	0	0	1	0	0	0	3	2	2	3	0	0	0	0	0	3	1	0	3	1	1	2	0	3	1	0
1	2	0	1	2	4	0	0	0	0	4	1	1	1	0	0	0	0	1	3	0	0	0	0	0	1	1	2	0	0	3	0	0	3	2	0	0	0	0	2	0	0	3	0	1	2	0	4	3	0
3	1	2	1	0	3	0	0	1	1	4	1	1	3	0	1	0	1	1	3	0	1	0	0	0	0	1	0	0	0	1	0	0	3	1	0	0	0	0	3	0	1	2	0	1	3	2	2	3	2
0	0	0	1	0	3	0	0	0	0	5	2	1	1	0	0	2	1	1	1	0	2	0	0	0	0	1	0	0	0	3	0	0	3	0	0	0	0	2	2	2	0	1	1	3	0	0	3	1	0
2	0	2	1	0	2	0	0	0	0	4	0	1	3	0	1	0	2	1	3	0	1	1	0	0	0	1	0	0	0	1	0	0	4	1	0	0	0	2	3	1	0	1	0	1	2	2	1	3	2
0	0	0	1	0	3	0	0	0	0	4	0	1	2	0	0	0	2	1	1	0	0	0	0	0	0	1	0	0	0	0	0	0	3	0	0	0	0	2	2	2	0	1	2	1	0	0	1	0	0
3	0	0	1	0	2	0	0	0	0	4	1	1	2	0	0	0	2	1	1	0	0	0	0	0	0	1	0	0	0	0	0	0	4	1	0	0	0	2	2	1	0	1	1	1	0	0	1	0	0
0	0	0	1	0	3	0	0	0	0	3	0	1	0	0	0	0	1	1	1	0	0	1	0	0	0	1	0	0	0	0	0	0	4	1	0	0	0	2	2	1	0	1	1	1	0	0	3	0	0
0	0	0	1	0	4	0	0	0	0	3	0	1	1	0	0	0	2	1	1	0	0	1	0	0	2	0	0	1	0	1	0	0	3	0	0	1	1	0	2	1	0	1	1	1	0	0	4	0	1
0	1	0	1	2	3	1	0	1	1	3	1	1	1	0	0	0	2	0	1	0	0	0	1	0	2	1	0	0	0	3	0	0	1	0	0	1	0	1	3	1	1	0	1	1	3	0	2	2	0
2	2	1	1	1	4	1	0	0	0	3	0	1	2	0	0	0	2	0	1	0	0	0	1	0	3	1	2	0	0	0	0	0	3	0	0	1	0	0	2	1	0	1	2	1	0	0	3	0	0
1	1	1	1	0	3	0	1	1	1	3	1	1	1	0	0	0	3	0	1	0	0	1	0	0	2	1	0	1	0	1	0	0	1	1	0	1	2	2	2	0	1	0	0	1	1	0	3	1	0
4	2	1	1	1	3	1	0	0	0	3	1	1	3	0	0	0	2	0	1	0	0	0	1	0	3	1	2	0	0	1	0	0	4	1	0	1	0	0	2	0	0	0	0	1	0	0	2	1	0
0	0	1	1	0	4	0	1	0	0	4	0	1	0	0	0	0	2	0	1	0	0	0	0	0	0	1	0	1	0	0	0	0	1	0	0	0	2	2	2	1	0	3	2	1	0	0	4	0	0
3	0	2	1	0	3	0	0	0	0	4	0	1	3	0	1	0	1	1	3	0	1	0	0	0	0	1	0	0	0	1	0	0	4	0	0	0	0	0	3	1	0	2	1	1	2	2	2	3	2
0	1	0	1	0	3	0	0	1	1	3	2	1	1	0	0	2	0	1	2	0	2	1	0	0	0	1	0	0	0	3	0	0	1	1	0	0	0	0	2	0	1	2	0	3	1	0	3	1	0
0	0	0	1	0	4	0	0	0	0	3	2	1	1	0	0	2	0	1	2	0	2	1	0	0	0	0	0	1	0	3	0	0	1	1	0	0	1	0	2	0	0	3	0	3	0	0	4	0	0
2	2	0	1	0	4	0	0	2	0	3	0	1	0	0	0	2	0	0	3	0	0	1	0	0	0	1	0	0	0	0	0	0	3	1	0	0	1	2	3	0	0	4	2	1	0	0	4	0	0
2	0	0	1	0	2	0	0	0	0	5	1	1	1	0	0	0	0	0	1	0	0	0	1	0	0	1	0	0	0	3	2	2	4	0	0	0	0	2	3	1	0	1	1	1	2	0	1	1	0
0	0	0	1	0	3	0	0	0	0	5	2	1	1	0	0	2	1	1	1	0	2	0	0	0	0	0	0	1	0	3	0	0	3	0	0	0	1	2	2	2	0	1	1	3	0	0	3	0	0
0	0	0	1	0	3	0	0	0	0	5	2	1	0	0	0	2	1	1	1	0	2	0	0	0	0	1	0	0	0	2	0	0	3	0	0	0	0	2	2	2	0	1	2	3	0	0	3	0	0
3	0	0	1	0	2	0	0	0	0	5	2	1	1	0	0	0	0	0	1	0	0	0	1	0	0	0	0	1	0	3	2	2	4	1	0	0	1	2	3	0	0	1	0	1	2	0	1	0	0
3	0	0	1	0	2	0	0	0	0	5	2	1	0	0	0	0	0	0	1	0	0	0	1	0	0	1	0	0	0	2	2	2	4	1	0	0	0	2	3	0	0	1	1	1	2	0	1	0	0
0	2	0	1	2	2	0	0	0	0	4	0	1	0	0	0	0	0	0	3	0	0	1	0	0	1	1	2	0	0	2	0	0	4	2	0	0	0	2	2	0	0	1	1	1	2	0	3	2	0
0	1	0	1	0	2	0	0	1	1	4	0	1	1	0	0	0	1	1	1	0	0	0	0	0	0	1	0	0	0	1	0	0	4	0	0	0	0	2	2	2	1	0	1	1	1	0	2	1	0
1	0	0	1	0	3	0	0	0	0	4	1	1	3	0	0	0	2	1	1	0	0	0	0	0	0	1	0	0	0	1	0	0	3	1	0	0	0	2	2	1	0	1	0	1	0	0	1	1	0
2	0	0	1	0	2	0	0	0	0	4	1	1	3	0	0	0	2	1	1	0	0	0	0	0	0	1	0	0	0	1	0	0	4	1	0	0	0	2	2	1	0	0	0	1	0	0	0	1	0
3	0	0	1	0	1	0	0	0	0	3	0	1	1	0	0	0	2	1	1	0	0	1	0	0	0	1	0	0	0	1	2	0	5	1	0	0	0	2	2	1	0	0	0	1	0	0	0	1	0
0	1	1	1	0	3	0	1	1	1	3	0	1	1	0	0	0	3	0	1	0	0	1	0	0	2	1	0	1	0	1	0	0	1	0	0	1	2	2	2	1	1	0	1	1	1	0	3	1	0
0	0	0	1	0	4	0	0	0	0	4	2	1	1	0	0	2	2	1	1	0	2	1	0	0	2	1	0	0	0	3	0	0	1	0	0	1	0	0	2	1	0	1	1	3	0	0	4	1	1
0	1	1	1	2	3	0	0	1	1	4	1	1	1	0	0	0	2	0	2	0	0	0	1	0	2	1	0	0	0	3	0	0	1	0	0	3	0	0	2	2	1	0	1	3	1	0	3	2	0
3	0	0	1	0	4	0	0	0	0	3	1	1	2	0	0	0	3	1	1	0	0	1	0	0	2	1	0	0	0	0	0	0	3	1	0	1	0	0	2	0	0	1	1	1	0	0	3	0	1
1	1	0	1	0	3	1	0	1	1	3	3	1	1	0	0	2	2	0	1	0	0	0	1	0	2	1	0	0	0	3	0	0	1	1	0	1	0	1	2	0	1	0	0	1	3	0	2	2	0
2	0	0	1	2	3	1	0	0	0	3	2	1	1	0	0	0	2	0	1	0	0	0	1	0	2	1	0	0	0	3	0	0	2	1	0	1	0	1	3	0	0	0	0	1	2	0	2	2	0
1	0	0	1	2	4	1	0	0	0	3	2	1	0	0	0	0	2	0	1	0	0	0	1	0	2	1	0	0	0	2	0	0	1	1	0	1	0	1	3	0	0	1	1	1	2	0	3	1	0
1	0	1	1	0	3	0	1	0	0	2	0	1	1	0	0	0	3	0	1	0	0	2	0	0	2	1	0	1	0	1	0	0	2	1	0	1	2	2	2	0	0	0	0	1	0	0	3	1	0
2	2	0	1	0	4	0	0	2	0	3	0	1	1	0	0	2	2	0	3	0	0	2	0	0	2	1	0	0	0	1	0	0	3	1	0	1	1	2	3	1	0	3	1	1	0	0	4	1	0
0	1	1	1	0	3	0	1	1	1	4	0	1	1	0	0	0	2	0	1	0	0	0	0	0	0	1	0	1	0	1	0	0	1	0	0	0	2	2	2	1	1	2	1	1	1	0	3	1	0
2	0	2	1	0	4	0	0	0	0	3	0	1	2	0	1	0	1	1	3	0	1	1	0	0	0	1	0	0	0	0	0	0	3	1	0	0	0	0	3	0	0	3	1	1	2	2	3	2	2
0	0	0	1	2	4	0	0	0	0	2	1	1	1	0	0	0	0	0	1	0	0	1	1	0	0	0	0	1	0	3	0	0	1	1	0	0	1	0	3	0	0	3	0	1	2	0	3	0	0
3	2	0	1	0	1	0	0	0	0	5	0	1	1	0	0	0	1	0	1	0	0	0	0	0	1	1	2	0	0	1	0	0	5	0	0	1	0	2	3	1	0	0	1	1	0	0	2	1	0
0	0	1	1	0	2	0	1	0	0	4	0	1	1	0	0	0	2	0	1	0	0	0	0	0	0	1	0	1	0	1	0	0	3	0	0	0	2	3	2	1	0	1	1	1	0	0	3	1	0
0	2	0	1	2	2	0	0	0	0	5	0	1	0	0	0	0	0	0	3	0	0	0	0	0	1	1	2	0	0	2	0	0	4	1	0	0	0	2	2	1	0	1	2	1	2	0	3	2	0
3	1	2	1	0	1	0	0	1	1	5	1	1	3	0	1	0	2	1	3	0	1	0	0	0	0	1	0	0	0	1	0	0	4	1	0	0	0	2	3	1	1	0	0	1	3	2	0	3	2
1	0	0	1	0	2	0	0	0	0	4	0	1	3	0	0	0	2	1	1	0	0	0	0	0	0	1	0	0	0	1	0	0	4	0	0	0	0	2	2	2	0	0	1	1	0	0	0	1	0
3	0	0	1	0	2	0	0	0	0	4	1	1	3	0	0	0	2	1	1	0	0	0	0	0	0	1	0	0	0	1	0	0	4	1	0	0	0	2	2	1	0	1	0	1	0	0	1	1	0
0	0	0	1	0	3	0	0	0	0	3	0	1	1	0	0	0	1	1	1	0	0	1	0	0	0	0	0	1	0	1	0	0	4	1	0	0	1	2	2	1	0	1	0	1	0	0	3	0	0
0	1	0	1	0	3	0	0	1	1	3	0	1	3	0	0	0	3	1	1	0	0	1	0	0	2	1	0	0	0	1	0	0	1	0	0	1	0	0	2	1	1	0	1	1	1	0	2	1	1
2	0	0	1	0	4	0	0	0	0	3	0	1	2	0	0	0	3	1	1	0	0	1	0	0	2	1	0	0	0	0	0	0	3	0	0	1	0	0	2	1	0	1	2	1	0	0	3	0	1
0	0	0	1	0	4	1	0	0	0	4	1	3	0	0	0	0	2	0	3	0	0	0	1	0	2	1	0	0	0	2	0	0	1	0	0	1	0	1	3	1	2	3	2	1	2	0	4	1	0
2	2	0	1	0	4	0	0	2	0	4	0	1	1	0	0	2	2	0	3	0	0	1	0	0	2	1	0	0	0	1	0	0	3	0	0	1	1	2	3	2	0	3	2	1	0	0	4	1	0
3	0	0	1	0	4	1	0	0	0	4	2	1	1	0	0	0	2	0	1	0	0	0	1	0	2	1	0	0	0	3	2	2	3	1	0	1	0	1	3	0	0	1	0	1	2	0	3	2	0
1	0	1	1	0	4	0	1	0	0	3	1	1	0	0	0	0	2	0	1	0	2	1	0	0	2	1	0	1	0	0	0	0	1	1	0	1	0	0	2	0	0	3	1	1	0	0	4	0	0
1	0	0	1	0	4	0	0	0	0	3	1	1	2	0	0	0	3	1	1	0	0	1	0	0	2	1	0	0	0	0	0	0	1	1	0	1	0	0	2	0	0	1	1	1	0	0	3	0	1
1	1	0	1	0	3	1	0	1	1	4	2	3	1	0	0	0	2	0	3	0	0	0	1	0	2	1	0	0	0	3	0	0	1	1	0	1	0	1	3	0	3	2	0	1	3	0	3	2	0
1	0	1	1	2	4	0	0	0	0	4	2	1	1	0	0	0	2	0	2	0	0	0	1	0	2	0	0	1	0	3	0	0	1	1	0	3	1	0	2	1	0	1	0	3	0	0	4	1	0
0	0	0	1	0	4	0	0	0	0	3	2	1	1	0	0	2	2	1	1	0	2	2	0	0	2	1	0	0	0	3	0	0	1	1	0	1	0	0	2	0	0	1	0	3	0	0	4	1	1
2	0	0	1	0	4	0	0	0	0	2	0	1	1	0	0	0	3	1	1	0	0	2	0	0	2	1	0	0	0	1	2	0	3	1	0	1	0	0	2	0	0	1	0	1	0	0	3	1	1
0	1	0	1	0	3	1	0	1	1	2	2	1	1	0	0	2	2	0	1	0	0	1	1	0	2	1	0	0	0	3	0	0	1	1	0	1	0	1	2	0	1	0	0	1	3	0	2	2	0
1	0	0	1	0	3	1	0	0	0	3	1	3	1	0	0	0	2	0	3	0	0	1	1	0	2	1	0	0	0	3	0	0	2	1	0	1	0	1	3	0	2	2	0	1	2	0	3	2	0
0	0	0	1	2	4	1	0	0	0	2	1	1	0	0	0	0	2	0	1	0	0	1	1	0	2	1	0	0	0	2	0	0	1	1	0	1	0	1	3	0	0	1	1	1	2	0	3	1	0
0	2	0	1	2	4	0	0	0	0	4	0	1	1	0	0	0	0	1	3	0	0	0	0	0	1	0	2	1	0	3	0	0	3	1	0	0	1	0	2	1	0	3	1	1	2	0	4	2	0
4	2	0	1	0	3	0	0	0	0	4	1	1	1	0	0	0	1	0	1	0	0	0	0	0	1	1	2	0	0	1	0	0	4	1	0	0	0	0	3	0	0	2	0	1	0	0	3	1	0
2	0	0	1	0	4	0	0	0	0	3	1	1	0	0	0	0	0	0	1	0	0	1	1	0	0	1	0	0	0	2	2	2	3	1	0	0	0	0	3	0	0	3	1	1	2	0	3	0	0
2	2	0	1	1	4	0	0	0	0	3	0	1	3	0	0	0	0	1	1	0	0	0	1	0	1	1	2	0	0	1	0	0	3	0	0	0	0	0	2	1	0	3	1	1	0	0	3	1	0
2	0	0	1	0	3	0	0	0	0	4	2	3	1	0	0	0	0	0	3	0	0	0	1	0	0	1	0	0	0	3	0	0	2	1	0	0	0	0	3	0	2	3	0	1	2	0	3	1	0
1	0	0	1	2	4	0	0	0	0	3	2	1	0	0	0	0	0	0	1	0	0	0	1	0	0	1	0	0	0	2	0	0	1	1	0	0	0	0	3	0	0	3	1	1	2	0	3	0	0
1	2	0	1	2	2	0	0	0	0	5	1	1	1	0	0	0	0	0	3	0	0	0	0	0	1	0	2	1	0	3	0	0	4	2	0	0	1	2	2	0	0	1	0	1	2	0	3	2	0
3	2	0	1	0	1	0	0	0	0	4	0	1	1	0	0	0	1	0	1	0	0	1	0	0	1	1	2	0	0	1	0	0	5	1	0	1	0	2	3	0	0	0	0	1	0	0	2	1	0
2	0	0	1	0	2	0	0	0	0	4	0	1	0	0	0	0	2	1	1	0	0	0	0	0	0	1	0	0	0	0	2	0	4	0	0	0	0	2	2	2	0	1	2	1	0	0	1	0	0
1	0	0	1	0	2	0	0	0	0	4	1	1	1	0	0	0	2	1	1	0	0	0	0	0	0	1	0	0	0	1	0	0	3	1	0	0	2	3	2	2	0	1	0	1	0	0	3	1	0
2	2	1	1	1	4	1	0	0	0	3	0	1	3	0	0	0	2	0	1	0	0	0	1	0	3	1	2	0	0	1	0	0	3	0	0	1	0	0	2	1	0	1	1	1	0	0	3	1	0
4	0	2	1	0	3	0	0	0	0	4	1	1	3	0	1	0	3	1	3	0	0	1	0	0	2	1	0	0	0	1	0	0	4	1	0	1	0	0	3	0	0	0	0	1	2	2	2	3	2
1	1	0	1	0	3	0	0	1	1	3	1	1	3	0	0	0	3	1	1	0	0	1	0	0	2	1	0	0	0	1	0	0	1	1	0	1	0	0	2	0	1	0	0	1	1	0	2	1	1
3	0	0	1	0	4	0	0	0	0	3	1	1	3	0	0	0	3	1	1	0	0	1	0	0	2	1	0	0	0	1	0	0	3	1	0	1	0	0	2	0	0	1	0	1	0	0	3	1	1
1	0	0	1	0	4	1	0	0	0	4	2	3	1	0	0	0	2	0	3	0	0	0	1	0	2	0	0	1	0	3	0	0	1	1	0	1	1	1	3	0	2	3	0	1	2	0	4	1	0
0	1	1	1	0	3	0	1	1	1	2	0	1	1	0	0	0	2	0	1	0	2	2	0	0	2	1	0	1	0	1	0	0	1	1	0	1	0	0	2	0	1	2	0	1	1	0	3	1	0
0	0	0	1	0	4	0	0	0	0	2	0	1	3	0	0	0	3	1	1	0	0	2	0	0	2	1	0	0	0	1	0	0	1	1	0	1	0	0	2	0	0	1	0	1	0	0	3	1	1
3	2	1	1	1	3	1	0	0	0	2	0	1	3	0	0	0	2	0	1	0	0	1	1	0	3	1	2	0	0	1	0	0	4	1	0	1	0	0	2	0	0	0	0	1	0	0	2	1	0
0	0	1	1	0	4	0	1	0	0	4	0	1	1	0	0	0	2	0	1	0	0	0	0	0	0	0	0	2	0	1	0	0	1	0	0	0	3	2	2	1	0	3	1	1	0	0	4	0	0
2	0	0	1	0	4	0	0	0	0	4	1	1	0	0	0	0	0	0	1	0	0	0	1	0	0	1	0	0	0	2	2	2	3	0	0	0	0	0	3	1	0	3	2	1	2	0	3	0	0
3	0	0	1	0	4	0	0	0	0	4	2	1	0	0	0	0	0	0	1	0	0	0	1	0	0	1	0	0	0	2	2	2	3	1	0	0	0	0	3	0	0	3	1	1	2	0	3	0	0
2	2	0	1	0	4	0	0	0	0	3	0	1	1	0	0	0	1	0	1	0	0	1	0	0	1	0	2	1	0	1	0	0	3	1	0	0	1	0	3	0	0	3	0	1	0	0	4	0	0
3	3	0	1	0	3	0	0	3	1	4	1	1	1	0	0	2	0	0	3	0	0	0	0	0	0	1	0	0	0	1	0	0	3	1	0	0	1	2	3	0	1	3	1	1	1	0	3	1	0
4	2	0	1	1	3	0	0	0	0	3	1	1	3	0	0	0	0	1	1	0	0	0	1	0	1	1	2	0	0	1	0	0	4	1	0	0	0	0	2	0	0	2	0	1	0	0	2	1	0
0	0	0	1	2	4	0	0	0	0	2	1	1	0	0	0	0	0	0	1	0	0	1	1	0	0	1	0	0	0	2	0	0	1	1	0	0	0	0	3	0	0	3	1	1	2	0	3	0	0
1	0	0	1	0	3	0	0	0	0	5	3	1	0	0	0	2	1	1	1	0	2	0	0	0	0	1	0	0	0	2	0	0	3	1	0	0	0	2	2	1	0	1	1	3	0	0	3	0	0
2	0	0	1	0	2	0	0	0	0	4	1	1	1	0	0	0	0	0	1	0	0	1	1	0	0	1	0	0	0	3	2	2	4	1	0	0	0	2	3	0	0	1	0	1	2	0	1	1	0
2	1	0	1	0	1	0	0	1	1	4	1	1	1	0	0	0	0	0	1	0	0	1	1	0	0	1	0	0	0	3	2	2	4	1	0	0	0	2	3	0	1	0	0	1	3	0	0	1	0
0	0	0	1	0	3	0	0	0	0	4	0	1	1	0	0	0	1	1	1	0	0	0	0	0	0	1	0	0	0	1	0	0	4	0	0	0	0	2	2	2	0	1	1	1	0	0	3	1	0
0	0	0	1	0	3	0	0	0	0	4	0	1	0	0	0	0	1	1	1	0	0	0	0	0	0	1	0	0	0	0	0	0	4	0	0	0	0	2	2	2	0	1	2	1	0	0	3	0	0
0	0	0	1	0	3	0	0	0	0	3	0	1	2	0	0	0	2	1	1	0	0	1	0	0	0	1	0	0	0	0	0	0	3	1	0	0	0	2	2	1	0	1	1	1	0	0	1	0	0
2	0	0	1	0	2	0	0	0	0	3	0	1	3	0	0	0	2	1	1	0	0	1	0	0	0	1	0	0	0	1	0	0	4	1	0	0	0	2	2	1	0	1	0	1	0	0	1	1	0
0	0	0	1	0	4	0	0	0	0	3	0	1	3	0	0	0	3	1	1	0	0	1	0	0	2	1	0	0	0	1	0	0	1	0	0	1	0	0	2	1	0	1	1	1	0	0	3	1	1
2	0	0	1	0	4	0	0	0	0	3	0	1	3	0	0	0	3	1	1	0	0	1	0	0	2	0	0	1	0	1	0	0	3	0	0	1	1	0	2	1	0	1	1	1	0	0	3	0	1
3	0	0	1	0	4	1	0	0	0	4	2	1	1	0	0	0	2	0	1	0	0	0	1	0	2	0	0	1	0	3	2	2	3	1	0	1	1	1	3	0	0	1	0	1	2	0	3	1	0
1	0	0	1	0	4	1	2	2	0	4	2	1	1	0	0	0	2	0	1	0	0	0	1	0	2	0	2	1	0	3	0	0	1	1	0	3	1	1	2	0	0	1	0	1	2	0	3	1	0
2	0	0	1	0	3	0	0	0	0	3	1	1	3	0	0	0	3	1	1	0	0	1	0	0	2	1	0	0	0	1	0	0	2	1	0	1	0	0	2	0	0	0	0	1	0	0	2	1	1
3	2	1	1	1	4	1	0	0	0	3	1	1	3	0	0	0	2	0	1	0	0	0	1	0	3	0	2	1	0	1	0	0	3	1	0	1	1	0	2	0	0	1	0	1	0	0	3	0	0
2	0	2	1	0	4	0	0	0	0	3	0	1	2	0	1	0	3	1	3	0	0	2	0	0	2	1	0	0	0	0	0	0	3	1	0	1	0	0	3	0	0	1	1	1	2	2	3	2	2
2	2	1	1	1	4	1	0	0	0	2	0	1	3	0	0	0	2	0	1	0	0	1	1	0	3	1	2	0	0	1	0	0	3	1	0	1	0	0	2	0	0	1	0	1	0	0	3	1	0
2	2	1	1	1	4	1	0	0	0	2	0	1	3	0	0	0	2	0	1	0	0	1	1	0	3	0	2	1	0	1	0	0	3	1	0	1	1	0	2	0	0	1	0	1	0	0	3	0	0
3	2	0	1	0	3	0	0	0	0	3	0	1	1	0	0	0	1	0	1	0	0	1	0	0	1	1	2	0	0	1	0	0	4	1	0	0	0	0	3	0	0	2	0	1	0	0	3	1	0
0	0	0	1	2	4	0	0	0	0	3	1	1	1	0	0	0	0	0	1	0	0	0	1	0	0	1	0	0	0	3	0	0	1	0	0	0	0	0	3	1	0	3	1	1	2	0	3	1	0
2	2	0	1	0	4	0	0	2	0	3	0	1	1	0	0	2	0	0	3	0	0	1	0	0	0	1	0	0	0	1	0	0	3	1	0	0	1	2	3	0	0	4	1	1	0	0	4	1	0
4	0	2	1	0	1	0	0	0	0	5	1	1	3	0	1	0	2	1	3	0	1	0	0	0	0	1	0	0	0	1	0	0	5	1	0	0	0	2	3	1	0	0	0	1	2	2	0	3	2
1	0	0	1	0	2	0	0	0	0	4	2	1	1	0	0	2	1	1	1	0	2	1	0	0	0	1	0	0	0	3	0	0	4	1	0	0	0	2	2	1	0	0	0	3	0	0	2	1	0
2	0	0	1	0	2	0	0	0	0	4	0	1	2	0	0	0	2	1	1	0	0	0	0	0	0	1	0	0	0	0	0	0	4	0	0	0	0	2	2	2	0	1	2	1	0	0	1	0	0
2	0	0	1	0	2	0	0	0	0	4	1	1	1	0	0	0	1	1	1	0	0	0	0	0	0	1	0	0	0	1	0	0	5	1	0	0	0	2	2	1	0	0	0	1	0	0	2	1	0
1	1	0	1	0	1	0	0	1	1	4	1	1	1	0	0	0	2	1	1	0	0	0	0	0	0	1	0	0	0	1	0	0	3	1	0	0	2	3	2	2	1	0	0	1	1	0	2	1	0
1	0	0	1	0	2	0	0	0	0	4	1	1	0	0	0	0	2	1	1	0	0	0	0	0	0	1	0	0	0	0	0	0	3	1	0	0	2	3	2	2	0	1	1	1	0	0	3	0	0
0	0	0	1	0	3	0	0	0	0	3	0	1	3	0	0	0	2	1	1	0	0	1	0	0	0	1	0	0	0	1	0	0	3	1	0	0	0	2	2	1	0	1	0	1	0	0	1	1	0
0	1	0	1	0	1	0	0	1	1	3	0	1	1	0	0	0	2	1	1	0	0	1	0	0	0	1	0	0	0	1	0	0	3	1	0	0	2	3	2	2	1	0	0	1	1	0	2	1	0
0	0	0	1	0	2	0	0	0	0	3	0	1	0	0	0	0	2	1	1	0	0	1	0	0	0	1	0	0	0	0	0	0	3	1	0	0	2	3	2	2	0	1	1	1	0	0	3	0	0
2	1	2	1	0	3	0	0	1	1	4	0	1	3	0	1	0	3	1	3	0	0	1	0	0	2	1	0	0	0	1	0	0	3	0	0	1	0	0	3	1	1	0	1	1	3	2	2	3	2
2	0	0	1	0	4	0	0	0	0	3	0	1	3	0	0	0	3	1	1	0	0	1	0	0	2	1	0	0	0	1	0	0	3	0	0	1	0	0	2	1	0	1	1	1	0	0	3	1	1
0	1	0	1	0	3	0	0	1	1	3	0	1	1	0	0	0	2	1	1	0	0	1	0	0	2	1	0	0	0	1	0	0	3	0	0	1	0	0	2	1	1	0	1	1	1	0	3	1	1
1	0	1	1	0	4	0	1	0	0	3	1	1	1	0	0	0	3	0	1	0	0	1	0	0	2	0	0	2	0	1	0	0	1	1	0	1	3	2	2	0	0	1	0	1	0	0	4	0	0
3	2	0	1	0	4	0	0	2	0	4	1	1	1	0	0	2	2	0	3	0	0	1	0	0	2	1	0	0	0	1	0	0	3	1	0	1	1	2	3	1	0	3	1	1	0	0	4	1	0
0	1	0	1	0	3	1	2	3	1	3	1	1	1	0	0	0	2	0	1	0	0	1	1	0	2	1	2	0	0	3	0	0	1	1	0	3	0	1	2	0	1	0	0	1	3	0	2	2	0
0	2	1	1	2	4	1	0	0	0	3	0	1	0	0	0	0	2	0	3	0	0	1	0	0	3	1	2	0	0	2	0	0	3	2	0	1	0	0	2	0	0	1	1	1	2	0	4	2	0
2	2	0	1	0	4	0	0	0	0	4	0	1	1	0	0	0	1	0	1	0	0	0	0	0	1	0	2	1	0	1	0	0	3	0	0	0	1	0	3	1	0	3	1	1	0	0	4	0	0
2	0	2	1	0	4	0	0	0	0	4	0	1	2	0	1	0	1	1	3	0	1	0	0	0	0	1	0	0	0	0	0	0	3	0	0	0	0	0	3	1	0	3	2	1	2	2	3	2	2
3	0	2	1	0	4	0	0	0	0	4	1	1	3	0	1	0	1	1	3	0	1	0	0	0	0	1	0	0	0	1	0	0	3	1	0	0	0	0	3	0	0	3	0	1	2	2	3	3	2
3	0	0	1	0	3	0	0	0	0	3	1	1	1	0	0	0	0	0	1	0	0	1	1	0	0	1	0	0	0	3	2	2	4	1	0	0	0	0	3	0	0	2	0	1	2	0	2	1	0
2	3	0	1	0	3	0	0	3	1	4	0	1	1	0	0	2	0	0	3	0	0	0	0	0	0	1	0	0	0	1	0	0	3	0	0	0	1	2	3	1	1	3	2	1	1	0	3	1	0
0	0	0	1	0	4	0	0	0	0	3	1	3	1	0	0	0	0	0	3	0	0	1	1	0	0	0	0	1	0	3	0	0	1	1	0	0	1	0	3	0	2	4	0	1	2	0	4	0	0
0	0	0	1	0	4	0	0	0	0	3	1	3	0	0	0	0	0	0	3	0	0	1	1	0	0	1	0	0	0	2	0	0	1	1	0	0	0	0	3	0	2	4	1	1	2	0	4	0	0
3	2	0	1	1	3	0	0	0	0	2	0	1	3	0	0	0	0	1	1	0	0	1	1	0	1	1	2	0	0	1	0	0	4	1	0	0	0	0	2	0	0	2	0	1	0	0	2	1	0
3	2	0	1	0	2	0	0	0	0	5	1	1	1	0	0	0	1	0	1	0	0	0	0	0	1	0	2	1	0	1	0	0	4	1	0	1	1	2	3	0	0	1	0	1	0	0	3	0	0
2	0	0	1	0	2	0	0	0	0	5	3	1	1	0	0	2	1	1	1	0	2	0	0	0	0	1	0	0	0	3	0	0	4	1	0	0	0	2	2	1	0	0	0	3	0	0	2	1	0
0	1	0	1	0	2	0	0	1	1	4	2	1	1	0	0	2	1	1	1	0	2	1	0	0	0	1	0	0	0	3	0	0	3	1	0	0	0	2	2	1	1	0	0	3	1	0	2	1	0
0	0	0	1	0	3	0	0	0	0	4	0	1	3	0	0	0	2	1	1	0	0	0	0	0	0	0	0	1	0	1	0	0	3	0	0	0	1	2	2	2	0	1	1	1	0	0	1	0	0
1	0	0	1	0	2	0	0	0	0	4	1	1	1	0	0	0	2	1	1	0	0	0	0	0	0	0	0	1	0	1	0	0	3	1	0	0	3	3	2	2	0	1	0	1	0	0	3	0	0
0	0	0	1	0	2	0	0	0	0	3	0	1	1	0	0	0	2	1	1	0	0	1	0	0	0	0	0	1	0	1	0	0	3	1	0	0	3	3	2	2	0	1	0	1	0	0	3	0	0
1	0	0	1	0	3	0	0	0	0	3	0	1	3	0	0	0	3	1	1	0	0	1	0	0	2	1	0	0	0	1	0	0	2	0	0	1	0	0	2	1	0	0	1	1	0	0	2	1	1
2	0	0	1	0	4	1	0	0	0	4	1	1	1	0	0	0	2	0	1	0	0	0	1	0	2	1	0	0	0	3	2	2	3	0	0	1	0	1	3	1	0	1	1	1	2	0	3	2	0
3	0	0	1	0	3	1	0	0	0	4	1	1	1	0	0	0	2	0	1	0	0	0	1	0	2	1	0	0	0	3	2	2	4	0	0	1	0	1	3	1	0	0	1	1	2	0	2	2	0
2	0	0	1	0	3	1	2	2	0	4	2	1	1	0	0	0	2	0	1	0	0	0	1	0	2	1	2	0	0	3	0	0	2	1	0	3	0	1	2	0	0	0	0	1	2	0	2	2	0
1	1	0	1	2	3	1	0	1	1	3	2	1	1	0	0	0	2	0	1	0	0	0	1	0	2	1	0	0	0	3	0	0	1	1	0	1	0	1	3	0	1	0	0	1	3	0	2	2	0
2	0	1	1	2	3	0	0	0	0	4	2	1	1	0	0	0	2	0	2	0	0	0	1	0	2	1	0	0	0	3	0	0	2	1	0	3	0	0	2	1	0	0	0	3	0	0	3	2	0
0	1	0	1	0	3	1	0	1	1	3	1	3	1	0	0	0	2	0	3	0	0	1	1	0	2	1	0	0	0	3	0	0	1	1	0	1	0	1	3	0	3	2	0	1	3	0	3	2	0
3	2	0	1	0	3	0	0	2	0	3	0	1	1	0	0	2	2	0	3	0	0	2	0	0	2	1	0	0	0	1	0	0	4	1	0	1	1	2	3	1	0	2	1	1	0	0	3	1	0
2	2	0	1	0	4	0	0	2	0	3	0	1	0	0	0	2	2	0	3	0	0	2	0	0	2	1	0	0	0	0	0	0	3	1	0	1	1	2	3	1	0	3	2	1	0	0	4	0	0
3	2	0	1	0	4	0	0	0	0	4	1	1	1	0	0	0	1	0	1	0	0	0	0	0	1	1	2	0	0	1	0	0	3	1	0	0	0	0	3	0	0	3	0	1	0	0	4	1	0
1	0	0	1	0	4	0	0	0	0	4	3	1	1	0	0	2	0	1	2	0	2	0	0	0	0	0	0	1	0	3	0	0	1	1	0	0	1	0	2	0	0	3	0	3	0	0	4	0	0
4	0	2	1	0	3	0	0	0	0	4	1	1	3	0	1	0	1	1	3	0	1	0	0	0	0	1	0	0	0	1	0	0	4	1	0	0	0	0	3	0	0	2	0	1	2	2	2	3	2
2	3	0	1	0	3	0	0	1	1	3	0	1	1	0	0	0	1	0	1	0	0	1	0	0	1	1	2	0	0	1	0	0	3	1	0	0	0	0	3	0	1	2	0	1	1	0	3	1	0
2	0	0	1	0	4	0	0	0	0	3	1	1	1	0	0	0	0	0	1	0	0	1	1	0	0	0	0	1	0	3	2	2	3	1	0	0	1	0	3	0	0	3	0	1	2	0	3	0	0
2	2	0	1	1	4	0	0	0	0	3	0	1	3	0	0	0	0	1	1	0	0	0	1	0	1	0	2	1	0	1	0	0	3	0	0	0	1	0	2	1	0	3	1	1	0	0	3	0	0
0	0	2	1	2	4	0	0	0	0	2	1	1	1	0	0	0	0	0	1	0	0	1	1	0	0	1	0	0	0	3	0	0	1	1	0	0	0	0	2	0	0	3	0	1	2	0	3	1	0
0	0	0	1	2	4	0	0	0	0	2	1	1	1	0	0	0	0	0	1	0	0	1	1	0	0	1	0	0	0	3	0	0	1	1	0	0	0	0	3	0	0	3	0	1	2	0	3	1	0
2	2	0	1	1	4	0	0	0	0	2	0	1	3	0	0	0	0	1	1	0	0	1	1	0	1	1	2	0	0	1	0	0	3	1	0	0	0	0	2	0	0	3	0	1	0	0	3	1	0
1	0	1	1	0	1	0	1	0	0	4	0	1	1	0	0	0	2	0	1	0	0	0	0	0	0	1	0	1	0	1	0	0	4	0	0	0	2	3	2	1	0	0	1	1	0	0	2	1	0
0	0	1	1	0	2	0	1	0	0	3	0	1	0	0	0	0	2	0	1	0	0	1	0	0	0	1	0	1	0	0	0	0	3	1	0	0	2	3	2	0	0	1	1	1	0	0	3	0	0
0	0	0	1	0	3	0	0	0	0	4	2	1	1	0	0	2	1	1	1	0	2	1	0	0	0	0	0	1	0	3	0	0	3	1	0	0	1	2	2	1	0	1	0	3	0	0	3	0	0
0	0	0	1	0	3	0	0	0	0	4	2	1	0	0	0	2	1	1	1	0	2	1	0	0	0	1	0	0	0	2	0	0	3	1	0	0	0	2	2	1	0	1	1	3	0	0	3	0	0
2	0	0	1	0	2	0	0	0	0	4	0	1	3	0	0	0	2	1	1	0	0	0	0	0	0	1	0	0	0	1	0	0	4	0	0	0	0	2	2	2	0	1	1	1	0	0	1	1	0
0	0	0	1	0	2	0	0	0	0	4	0	1	1	0	0	0	2	1	1	0	0	0	0	0	0	1	0	0	0	1	0	0	3	0	0	0	2	3	2	3	0	1	1	1	0	0	3	1	0
2	0	2	1	0	4	0	0	0	0	4	0	1	3	0	1	0	3	1	3	0	0	1	0	0	2	0	0	1	0	1	0	0	3	0	0	1	1	0	3	1	0	1	1	1	2	2	3	2	2
1	0	0	1	0	3	0	0	0	0	3	0	1	1	0	0	0	2	1	1	0	0	1	0	0	2	1	0	0	0	1	0	0	4	0	0	1	0	0	2	1	0	0	1	1	0	0	3	1	1
0	0	0	1	2	4	1	0	0	0	3	1	1	0	0	0	0	2	0	1	0	0	0	1	0	2	1	0	0	0	2	0	0	1	0	0	1	0	1	3	1	0	1	2	1	2	0	3	1	0
1	2	1	1	2	4	1	0	0	0	4	1	1	1	0	0	0	2	0	3	0	0	0	0	0	3	0	2	1	0	3	0	0	3	2	0	1	1	0	2	0	0	1	0	1	2	0	4	2	0
4	2	0	1	0	3	0	0	2	0	4	1	1	1	0	0	2	2	0	3	0	0	1	0	0	2	1	0	0	0	1	0	0	4	1	0	1	1	2	3	1	0	2	1	1	0	0	3	1	0
3	2	1	1	1	4	1	0	0	0	3	1	1	2	0	0	0	2	0	1	0	0	0	1	0	3	1	2	0	0	0	0	0	3	1	0	1	0	0	2	0	0	1	1	1	0	0	3	0	0
2	2	0	1	0	4	0	0	0	0	4	0	1	1	0	0	0	1	0	1	0	0	0	0	0	1	1	2	0	0	1	0	0	3	0	0	0	0	0	3	1	0	3	1	1	0	0	4	1	0
3	2	0	1	0	3	0	0	0	0	4	0	1	1	0	0	0	1	0	1	0	0	0	0	0	1	1	2	0	0	1	0	0	4	0	0	0	0	0	3	1	0	2	1	1	0	0	3	1	0
2	1	0	1	0	3	0	0	1	1	4	1	1	1	0	0	0	0	0	1	0	0	0	1	0	0	1	0	0	0	3	2	2	3	0	0	0	0	0	3	1	1	2	1	1	3	0	2	1	0
0	0	0	1	0	4	0	0	0	0	4	2	1	1	0	0	2	0	1	2	0	2	0	0	0	0	1	0	0	0	3	0	0	1	0	0	0	0	0	2	1	0	3	1	3	0	0	4	1	0
1	3	0	1	2	3	0	0	1	1	4	1	1	1	0	0	0	0	1	3	0	0	0	0	0	1	1	2	0	0	3	0	0	3	2	0	0	0	0	2	0	1	2	0	1	3	0	3	3	0
0	1	2	1	2	3	0	0	1	1	3	1	1	1	0	0	0	0	0	1	0	0	0	1	0	0	1	0	0	0	3	0	0	1	0	0	0	0	0	2	1	1	2	1	1	3	0	2	1	0
0	0	0	1	2	4	0	0	0	0	3	1	1	1	0	0	0	0	0	1	0	0	0	1	0	0	0	0	1	0	3	0	0	1	0	0	0	1	0	3	1	0	3	1	1	2	0	3	0	0
1	0	0	1	0	4	0	0	0	0	4	2	3	1	0	0	0	0	0	3	0	0	0	1	0	0	1	0	0	0	3	0	0	1	1	0	0	0	0	3	0	2	4	0	1	2	0	4	1	0
1	0	0	1	2	4	0	0	0	0	3	2	1	1	0	0	0	0	0	1	0	0	0	1	0	0	1	0	0	0	3	0	0	1	1	0	0	0	0	3	0	0	3	0	1	2	0	3	1	0
0	1	0	1	0	3	0	0	1	1	3	1	3	1	0	0	0	0	0	3	0	0	1	1	0	0	1	0	0	0	3	0	0	1	1	0	0	0	0	3	0	3	3	0	1	3	0	3	1	0
2	3	0	1	0	3	0	0	3	1	3	0	1	1	0	0	2	0	0	3	0	0	1	0	0	0	1	0	0	0	1	0	0	3	1	0	0	1	2	3	0	1	3	1	1	1	0	3	1	0
1	2	0	1	2	1	0	0	0	0	5	0	1	1	0	0	0	0	0	3	0	0	0	0	0	1	1	2	0	0	3	0	0	5	1	0	0	0	2	2	1	0	0	1	1	2	0	2	3	0
3	0	0	1	0	1	0	0	0	0	4	1	1	1	0	0	0	0	0	1	0	0	1	1	0	0	1	0	0	0	3	2	2	5	1	0	0	0	2	3	0	0	0	0	1	2	0	0	1	0
0	0	0	1	0	3	0	0	0	0	4	0	1	1	0	0	0	1	1	1	0	0	0	0	0	0	0	0	1	0	1	0	0	4	0	0	0	1	2	2	2	0	1	1	1	0	0	3	0	0
4	0	0	1	0	1	0	0	0	0	4	1	1	3	0	0	0	2	1	1	0	0	0	0	0	0	1	0	0	0	1	0	0	5	1	0	0	0	2	2	1	0	0	0	1	0	0	0	1	0
0	2	1	1	2	4	1	0	0	0	4	0	1	1	0	0	0	2	0	3	0	0	0	0	0	3	0	2	1	0	3	0	0	3	1	0	1	1	0	2	1	0	1	1	1	2	0	4	2	0
0	2	1	1	2	4	1	0	0	0	4	0	1	0	0	0	0	2	0	3	0	0	0	0	0	3	1	2	0	0	2	0	0	3	1	0	1	0	0	2	1	0	1	2	1	2	0	4	2	0
0	0	1	1	0	4	0	1	0	0	3	0	1	1	0	0	0	3	0	1	0	0	1	0	0	2	1	0	1	0	1	0	0	1	0	0	1	2	2	2	1	0	1	1	1	0	0	4	1	0
0	1	1	1	0	3	0	1	1	1	3	0	1	1	0	0	0	2	0	1	0	2	1	0	0	2	1	0	1	0	1	0	0	1	0	0	1	0	0	2	1	1	2	1	1	1	0	3	1	0
0	0	0	1	0	4	1	2	2	0	4	1	1	0	0	0	0	2	0	1	0	0	0	1	0	2	1	2	0	0	2	0	0	1	0	0	3	0	1	2	1	0	1	2	1	2	0	3	1	0
3	0	2	1	0	4	0	0	0	0	4	1	1	3	0	1	0	3	1	3	0	0	1	0	0	2	1	0	0	0	1	0	0	3	1	0	1	0	0	3	0	0	1	0	1	2	2	3	3	2
1	0	1	1	2	4	0	0	0	0	4	2	1	0	0	0	0	2	0	2	0	0	0	1	0	2	1	0	0	0	2	0	0	1	1	0	3	0	0	2	1	0	1	1	3	0	0	4	1	0
0	0	1	1	0	4	0	1	0	0	2	0	1	0	0	0	0	3	0	1	0	0	2	0	0	2	1	0	1	0	0	0	0	1	1	0	1	2	2	2	0	0	1	1	1	0	0	4	0	0
1	0	0	1	0	3	0	0	0	0	2	0	1	1	0	0	0	2	1	1	0	0	2	0	0	2	1	0	0	0	1	0	0	4	1	0	1	0	0	2	0	0	0	0	1	0	0	3	1	1
0	0	0	1	2	4	1	0	0	0	2	1	1	1	0	0	0	2	0	1	0	0	1	1	0	2	0	0	1	0	3	0	0	1	1	0	1	1	1	3	0	0	1	0	1	2	0	3	1	0
0	0	1	1	0	4	0	1	0	0	3	0	1	0	0	0	0	2	0	1	0	0	1	0	0	0	1	0	1	0	0	0	0	1	1	0	0	2	2	2	0	0	3	1	1	0	0	4	0	0
0	0	0	1	0	4	0	0	0	0	4	1	3	1	0	0	0	0	0	3	0	0	0	1	0	0	1	0	0	0	3	0	0	1	0	0	0	0	0	3	1	2	4	1	1	2	0	4	1	0
1	0	0	1	0	3	0	0	0	0	4	1	3	1	0	0	0	0	0	3	0	0	0	1	0	0	1	0	0	0	3	0	0	2	0	0	0	0	0	3	1	2	3	1	1	2	0	3	1	0
3	2	0	1	1	4	0	0	0	0	3	1	1	3	0	0	0	0	1	1	0	0	0	1	0	1	1	2	0	0	1	0	0	3	1	0	0	0	0	2	0	0	3	0	1	0	0	3	1	0
1	0	1	1	0	2	0	1	0	0	4	1	1	0	0	0	0	2	0	1	0	0	0	0	0	0	1	0	1	0	0	0	0	3	1	0	0	2	3	2	0	0	1	1	1	0	0	3	0	0
1	0	0	1	0	1	0	0	0	0	4	0	1	1	0	0	0	2	1	1	0	0	0	0	0	0	1	0	0	0	1	0	0	4	0	0	0	2	3	2	3	0	0	1	1	0	0	2	1	0
4	0	0	1	0	1	0	0	0	0	4	1	1	1	0	0	0	2	1	1	0	0	0	0	0	0	1	0	0	0	1	2	0	5	1	0	0	0	2	2	1	0	0	0	1	0	0	0	1	0
0	3	1	1	2	3	1	0	1	1	4	0	1	1	0	0	0	2	0	3	0	0	0	0	0	3	1	2	0	0	3	0	0	3	1	0	1	0	0	2	1	1	0	1	1	3	0	3	3	0
0	0	0	1	0	4	0	0	0	0	4	2	1	1	0	0	2	2	1	1	0	2	1	0	0	2	0	0	1	0	3	0	0	1	0	0	1	1	0	2	1	0	1	1	3	0	0	4	0	1
2	0	1	1	0	3	0	1	0	0	3	1	1	1	0	0	0	2	0	1	0	2	1	0	0	2	1	0	1	0	1	0	0	2	1	0	1	0	0	2	0	0	2	0	1	0	0	3	1	0
1	0	1	1	0	4	0	1	0	0	3	1	1	1	0	0	0	2	0	1	0	2	1	0	0	2	0	0	2	0	1	0	0	1	1	0	1	1	0	2	0	0	3	0	1	0	0	4	0	0
1	2	1	1	2	4	1	0	0	0	4	1	1	1	0	0	0	2	0	3	0	0	0	0	0	3	1	2	0	0	3	0	0	3	2	0	1	0	0	2	0	0	1	0	1	2	0	4	3	0
1	0	0	1	0	4	0	0	0	0	3	1	1	1	0	0	0	2	1	1	0	0	1	0	0	2	1	0	0	0	1	0	0	3	1	0	1	0	0	2	0	0	1	0	1	0	0	4	1	1
1	1	0	1	0	3	0	0	1	1	3	1	1	1	0	0	0	2	1	1	0	0	1	0	0	2	1	0	0	0	1	0	0	3	1	0	1	0	0	2	0	1	0	0	1	1	0	3	1	1
2	0	0	1	0	3	1	0	0	0	4	2	3	1	0	0	0	2	0	3	0	0	0	1	0	2	1	0	0	0	3	0	0	2	1	0	1	0	1	3	0	2	2	0	1	2	0	3	2	0
0	0	1	1	0	4	0	1	0	0	2	0	1	1	0	0	0	3	0	1	0	0	2	0	0	2	1	0	1	0	1	0	0	1	1	0	1	2	2	2	0	0	1	0	1	0	0	4	1	0
0	0	1	1	0	4	0	1	0	0	2	0	1	1	0	0	0	3	0	1	0	0	2	0	0	2	0	0	2	0	1	0	0	1	1	0	1	3	2	2	0	0	1	0	1	0	0	4	0	0
2	1	0	1	0	3	1	0	1	1	3	1	1	1	0	0	0	2	0	1	0	0	1	1	0	2	1	0	0	0	3	2	2	3	1	0	1	0	1	3	0	1	0	0	1	3	0	2	2	0
1	0	1	1	0	3	0	1	0	0	2	0	1	1	0	0	0	2	0	1	0	2	2	0	0	2	1	0	1	0	1	0	0	2	1	0	1	0	0	2	0	0	2	0	1	0	0	3	1	0
1	2	1	1	2	3	1	0	0	0	3	0	1	1	0	0	0	2	0	3	0	0	1	0	0	3	1	2	0	0	3	0	0	4	2	0	1	0	0	2	0	0	0	0	1	2	0	3	3	0
0	0	0	1	0	4	0	0	0	0	4	2	1	0	0	0	2	0	1	2	0	2	0	0	0	0	1	0	0	0	2	0	0	1	0	0	0	0	0	2	1	0	3	2	3	0	0	4	0	0
1	2	0	1	2	4	0	0	0	0	4	1	1	0	0	0	0	0	1	3	0	0	0	0	0	1	1	2	0	0	2	0	0	3	2	0	0	0	0	2	0	0	3	1	1	2	0	4	2	0
2	1	0	1	0	3	0	0	1	1	3	1	1	1	0	0	0	0	0	1	0	0	1	1	0	0	1	0	0	0	3	2	2	3	1	0	0	0	0	3	0	1	2	0	1	3	0	2	1	0
1	0	0	1	0	3	0	0	0	0	3	2	1	1	0	0	2	0	1	2	0	2	1	0	0	0	1	0	0	0	3	0	0	2	1	0	0	0	0	2	0	0	2	0	3	0	0	3	1	0
0	3	0	1	2	3	0	0	1	1	3	0	1	1	0	0	0	0	1	3	0	0	1	0	0	1	1	2	0	0	3	0	0	3	2	0	0	0	0	2	0	1	2	0	1	3	0	3	3	0
0	2	0	1	2	4	0	0	0	0	3	0	1	0	0	0	0	0	1	3	0	0	1	0	0	1	1	2	0	0	2	0	0	3	2	0	0	0	0	2	0	0	3	1	1	2	0	4	2	0
2	1	0	1	0	1	0	0	1	1	5	1	1	1	0	0	0	0	0	1	0	0	0	1	0	0	1	0	0	0	3	2	2	4	0	0	0	0	2	3	1	1	0	1	1	3	0	0	1	0
0	3	0	1	2	1	0	0	1	1	5	0	1	1	0	0	0	0	0	3	0	0	0	0	0	1	1	2	0	0	3	0	0	4	1	0	0	0	2	2	1	1	0	1	1	3	0	2	3	0
2	0	2	1	0	2	0	0	0	0	5	0	1	2	0	1	0	2	1	3	0	1	0	0	0	0	1	0	0	0	0	0	0	4	0	0	0	0	2	3	2	0	1	2	1	2	2	1	2	2
3	2	0	1	0	2	0	0	0	0	5	1	1	1	0	0	0	1	0	1	0	0	0	0	0	1	1	2	0	0	1	0	0	4	1	0	1	0	2	3	0	0	1	0	1	0	0	3	1	0
4	2	0	1	0	1	0	0	0	0	5	1	1	1	0	0	0	1	0	1	0	0	0	0	0	1	1	2	0	0	1	0	0	5	1	0	1	0	2	3	0	0	0	0	1	0	0	2	1	0
1	0	0	1	0	2	0	0	0	0	4	0	1	1	0	0	0	1	1	1	0	0	0	0	0	0	1	0	0	0	1	0	0	5	0	0	0	0	2	2	2	0	0	1	1	0	0	2	1	0
0	0	0	1	0	2	0	0	0	0	4	0	1	1	0	0	0	2	1	1	0	0	0	0	0	0	0	0	1	0	1	0	0	3	0	0	0	3	3	2	3	0	1	1	1	0	0	3	0	0
3	0	0	1	0	2	0	0	0	0	4	1	1	1	0	0	0	2	1	1	0	0	0	0	0	0	0	0	1	0	1	2	0	4	1	0	0	1	2	2	1	0	1	0	1	0	0	1	0	0
1	0	0	1	0	2	0	0	0	0	3	0	1	3	0	0	0	2	1	1	0	0	1	0	0	0	1	0	0	0	1	0	0	4	1	0	0	0	2	2	1	0	0	0	1	0	0	0	1	0
0	1	0	1	0	2	0	0	1	1	3	0	1	3	0	0	0	2	1	1	0	0	1	0	0	0	1	0	0	0	1	0	0	3	1	0	0	0	2	2	1	1	0	0	1	1	0	0	1	0
0	0	0	1	0	4	0	0	0	0	3	0	1	1	0	0	0	2	1	1	0	0	1	0	0	2	1	0	0	0	1	0	0	3	0	0	1	0	0	2	1	0	1	1	1	0	0	4	1	1
1	0	0	1	0	3	0	0	0	0	4	2	1	1	0	0	2	2	1	1	0	2	1	0	0	2	1	0	0	0	3	0	0	2	0	0	1	0	0	2	1	0	0	1	3	0	0	3	1	1
2	0	0	1	0	3	0	0	0	0	3	1	1	1	0	0	0	2	1	1	0	0	1	0	0	2	1	0	0	0	1	0	0	4	1	0	1	0	0	2	0	0	0	0	1	0	0	3	1	1
0	3	1	1	2	3	1	0	1	1	3	0	1	1	0	0	0	2	0	3	0	0	1	0	0	3	1	2	0	0	3	0	0	3	2	0	1	0	0	2	0	1	0	0	1	3	0	3	3	0
3	0	2	1	0	4	0	0	0	0	4	1	1	3	0	1	0	1	1	3	0	1	0	0	0	0	0	0	1	0	1	0	0	3	1	0	0	1	0	3	0	0	3	0	1	2	2	3	2	2
1	2	0	1	2	3	0	0	0	0	3	0	1	1	0	0	0	0	1	3	0	0	1	0	0	1	1	2	0	0	3	0	0	4	2	0	0	0	0	2	0	0	2	0	1	2	0	3	3	0
3	2	0	1	0	3	0	0	2	0	3	0	1	1	0	0	2	0	0	3	0	0	1	0	0	0	1	0	0	0	1	0	0	4	1	0	0	1	2	3	0	0	3	1	1	0	0	3	1	0
1	0	0	1	2	3	0	0	0	0	2	1	1	1	0	0	0	0	0	1	0	0	1	1	0	0	1	0	0	0	3	0	0	2	1	0	0	0	0	3	0	0	2	0	1	2	0	2	1	0
2	2	0	1	1	4	0	0	0	0	2	0	1	3	0	0	0	0	1	1	0	0	1	1	0	1	0	2	1	0	1	0	0	3	1	0	0	1	0	2	0	0	3	0	1	0	0	3	0	0
2	0	0	1	0	2	0	0	0	0	4	1	1	1	0	0	0	0	0	1	0	0	1	1	0	0	0	0	1	0	3	2	2	4	1	0	0	1	2	3	0	0	1	0	1	2	0	1	0	0
0	2	0	1	2	2	0	0	0	0	4	0	1	1	0	0	0	0	0	3	0	0	1	0	0	1	1	2	0	0	3	0	0	4	2	0	0	0	2	2	0	0	1	0	1	2	0	3	3	0
2	1	0	1	0	1	0	0	1	1	4	0	1	1	0	0	0	2	1	1	0	0	0	0	0	0	1	0	0	0	1	2	0	4	0	0	0	0	2	2	2	1	0	1	1	1	0	0	1	0
3	0	0	1	0	2	0	0	0	0	4	1	1	0	0	0	0	2	1	1	0	0	0	0	0	0	1	0	0	0	0	2	0	4	1	0	0	0	2	2	1	0	1	1	1	0	0	1	0	0
1	0	0	1	0	3	0	0	0	0	4	1	1	2	0	0	0	2	1	1	0	0	0	0	0	0	1	0	0	0	0	0	0	3	1	0	0	0	2	2	1	0	1	1	1	0	0	1	0	0
3	0	0	1	0	1	0	0	0	0	3	0	1	3	0	0	0	2	1	1	0	0	1	0	0	0	1	0	0	0	1	0	0	5	1	0	0	0	2	2	1	0	0	0	1	0	0	0	1	0
2	1	0	1	0	3	1	0	1	1	4	1	1	1	0	0	0	2	0	1	0	0	0	1	0	2	1	0	0	0	3	2	2	3	0	0	1	0	1	3	1	1	0	1	1	3	0	2	2	0
2	2	0	1	0	4	0	0	2	0	4	0	1	1	0	0	2	2	0	3	0	0	1	0	0	2	0	0	1	0	1	0	0	3	0	0	1	2	2	3	2	0	3	2	1	0	0	4	0	0
1	0	1	1	2	3	0	0	0	0	4	1	1	1	0	0	0	2	0	2	0	0	0	1	0	2	1	0	0	0	3	0	0	2	0	0	3	0	0	2	2	0	0	1	3	0	0	3	2	0
1	0	0	1	0	4	1	2	2	0	4	2	1	1	0	0	0	2	0	1	0	0	0	1	0	2	1	2	0	0	3	0	0	1	1	0	3	0	1	2	0	0	1	0	1	2	0	3	2	0
3	0	2	1	0	4	0	0	0	0	4	1	1	3	0	1	0	3	1	3	0	0	1	0	0	2	0	0	1	0	1	0	0	3	1	0	1	1	0	3	0	0	1	0	1	2	2	3	2	2
1	0	0	1	0	4	1	0	0	0	4	2	3	0	0	0	0	2	0	3	0	0	0	1	0	2	1	0	0	0	2	0	0	1	1	0	1	0	1	3	0	2	3	1	1	2	0	4	1	0
0	1	1	1	0	3	0	1	1	1	2	0	1	1	0	0	0	3	0	1	0	0	2	0	0	2	1	0	1	0	1	0	0	1	1	0	1	2	2	2	0	1	0	0	1	1	0	3	1	0
2	0	0	1	0	4	0	0	0	0	2	0	1	2	0	0	0	3	1	1	0	0	2	0	0	2	1	0	0	0	0	0	0	3	1	0	1	0	0	2	0	0	1	1	1	0	0	3	0	1
2	3	0	1	0	3	0	0	1	1	4	0	1	1	0	0	0	1	0	1	0	0	0	0	0	1	1	2	0	0	1	0	0	3	0	0	0	0	0	3	1	1	2	1	1	1	0	3	1	0
0	1	0	1	0	3	0	0	1	1	4	2	1	1	0	0	2	0	1	2	0	2	0	0	0	0	1	0	0	0	3	0	0	1	0	0	0	0	0	2	1	1	2	1	3	1	0	3	1	0
0	0	0	1	0	4	0	0	0	0	4	1	3	0	0	0	0	0	0	3	0	0	0	1	0	0	1	0	0	0	2	0	0	1	0	0	0	0	0	3	1	2	4	2	1	2	0	4	0	0
0	1	0	1	2	3	0	0	1	1	2	1	1	1	0	0	0	0	0	1	0	0	1	1	0	0	1	0	0	0	3	0	0	1	1	0	0	0	0	3	0	1	2	0	1	3	0	2	1	0
2	0	0	1	0	2	0	0	0	0	5	1	1	1	0	0	0	0	0	1	0	0	0	1	0	0	0	0	1	0	3	2	2	4	0	0	0	1	2	3	1	0	1	1	1	2	0	1	0	0
1	2	0	1	2	2	0	0	0	0	5	1	1	0	0	0	0	0	0	3	0	0	0	0	0	1	1	2	0	0	2	0	0	4	2	0	0	0	2	2	0	0	1	1	1	2	0	3	2	0
1	0	0	1	0	3	0	0	0	0	4	1	1	1	0	0	0	1	1	1	0	0	0	0	0	0	0	0	1	0	1	0	0	4	1	0	0	1	2	2	1	0	1	0	1	0	0	3	0	0
2	0	0	1	0	2	0	0	0	0	3	0	1	3	0	0	0	2	1	1	0	0	1	0	0	0	0	0	1	0	1	0	0	4	1	0	0	1	2	2	1	0	1	0	1	0	0	1	0	0
2	0	0	1	0	4	0	0	0	0	3	0	1	1	0	0	0	3	1	1	0	0	1	0	0	2	1	0	0	0	1	2	0	3	0	0	1	0	0	2	1	0	1	1	1	0	0	3	1	1
0	0	0	1	0	4	0	0	0	0	3	0	1	0	0	0	0	2	1	1	0	0	1	0	0	2	1	0	0	0	0	0	0	3	0	0	1	0	0	2	1	0	1	2	1	0	0	4	0	1
1	0	1	1	0	3	0	1	0	0	3	0	1	1	0	0	0	3	0	1	0	0	1	0	0	2	1	0	1	0	1	0	0	2	0	0	1	2	2	2	1	0	0	1	1	0	0	3	1	0
0	1	0	1	0	3	1	2	3	1	4	1	1	1	0	0	0	2	0	1	0	0	0	1	0	2	1	2	0	0	3	0	0	1	0	0	3	0	1	2	1	1	0	1	1	3	0	2	2	0
0	0	0	1	0	4	1	0	0	0	4	1	3	1	0	0	0	2	0	3	0	0	0	1	0	2	1	0	0	0	3	0	0	1	0	0	1	0	1	3	1	2	3	1	1	2	0	4	2	0
1	0	1	1	0	4	0	1	0	0	3	1	1	0	0	0	0	3	0	1	0	0	1	0	0	2	1	0	1	0	0	0	0	1	1	0	1	2	2	2	0	0	1	1	1	0	0	4	0	0
2	0	0	1	0	4	0	0	0	0	2	0	1	3	0	0	0	3	1	1	0	0	2	0	0	2	1	0	0	0	1	0	0	3	1	0	1	0	0	2	0	0	1	0	1	0	0	3	1	1
0	1	1	1	2	3	0	0	1	1	3	1	1	1	0	0	0	2	0	2	0	0	1	1	0	2	1	0	0	0	3	0	0	1	1	0	3	0	0	2	1	1	0	0	3	1	0	3	2	0
3	3	0	1	0	3	0	0	1	1	4	1	1	1	0	0	0	1	0	1	0	0	0	0	0	1	1	2	0	0	1	0	0	3	1	0	0	0	0	3	0	1	2	0	1	1	0	3	1	0
2	1	2	1	0	3	0	0	1	1	3	0	1	3	0	1	0	1	1	3	0	1	1	0	0	0	1	0	0	0	1	0	0	3	1	0	0	0	0	3	0	1	2	0	1	3	2	2	3	2
3	0	2	1	0	1	0	0	0	0	5	0	1	3	0	1	0	2	1	3	0	1	0	0	0	0	1	0	0	0	1	0	0	5	0	0	0	0	2	3	2	0	0	1	1	2	2	0	3	2
1	0	0	1	0	3	0	0	0	0	5	3	1	1	0	0	2	1	1	1	0	2	0	0	0	0	0	0	1	0	3	0	0	3	1	0	0	1	2	2	1	0	1	0	3	0	0	3	0	0
0	0	0	1	0	3	0	0	0	0	4	2	1	1	0	0	2	1	1	1	0	2	1	0	0	0	1	0	0	0	3	0	0	3	1	0	0	0	2	2	1	0	1	0	3	0	0	3	1	0
3	0	0	1	0	2	0	0	0	0	4	1	1	1	0	0	0	2	1	1	0	0	0	0	0	0	1	0	0	0	1	2	0	4	1	0	0	0	2	2	1	0	1	0	1	0	0	1	1	0
0	1	0	1	0	2	0	0	1	1	3	0	1	1	0	0	0	1	1	1	0	0	1	0	0	0	1	0	0	0	1	0	0	4	1	0	0	0	2	2	1	1	0	0	1	1	0	2	1	0
3	0	2	1	0	3	0	0	0	0	4	0	1	3	0	1	0	3	1	3	0	0	1	0	0	2	1	0	0	0	1	0	0	4	0	0	1	0	0	3	1	0	0	1	1	2	2	2	3	2
2	0	2	1	0	4	0	0	0	0	4	0	1	2	0	1	0	3	1	3	0	0	1	0	0	2	1	0	0	0	0	0	0	3	0	0	1	0	0	3	1	0	1	2	1	2	2	3	2	2
2	0	0	1	0	4	0	0	0	0	3	0	1	1	0	0	0	3	1	1	0	0	1	0	0	2	0	0	1	0	1	2	0	3	0	0	1	1	0	2	1	0	1	1	1	0	0	3	0	1
1	0	0	1	0	3	1	0	0	0	3	2	1	1	0	0	2	2	0	1	0	0	0	1	0	2	1	0	0	0	3	0	0	2	0	0	1	0	1	2	1	0	0	1	1	2	0	2	2	0
3	1	2	1	0	3	0	0	1	1	4	1	1	3	0	1	0	3	1	3	0	0	1	0	0	2	1	0	0	0	1	0	0	3	1	0	1	0	0	3	0	1	0	0	1	3	2	2	3	2
1	0	0	1	2	4	1	0	0	0	3	2	1	1	0	0	0	2	0	1	0	0	0	1	0	2	0	0	1	0	3	0	0	1	1	0	1	1	1	3	0	0	1	0	1	2	0	3	1	0
0	0	0	1	0	4	1	0	0	0	2	2	1	0	0	0	2	2	0	1	0	0	1	1	0	2	1	0	0	0	2	0	0	1	1	0	1	0	1	2	0	0	1	1	1	2	0	3	1	0
2	3	0	1	0	3	0	0	3	1	3	0	1	1	0	0	2	2	0	3	0	0	2	0	0	2	1	0	0	0	1	0	0	3	1	0	1	1	2	3	1	1	2	1	1	1	0	3	1	0
2	2	1	1	1	4	1	0	0	0	2	0	1	2	0	0	0	2	0	1	0	0	1	1	0	3	1	2	0	0	0	0	0	3	1	0	1	0	0	2	0	0	1	1	1	0	0	3	0	0
0	0	1	1	0	4	0	1	0	0	3	0	1	1	0	0	0	2	0	1	0	0	1	0	0	0	0	0	2	0	1	0	0	1	1	0	0	3	2	2	0	0	3	0	1	0	0	4	0	0
2	0	0	1	0	4	0	0	0	0	3	1	1	1	0	0	0	0	0	1	0	0	1	1	0	0	1	0	0	0	3	2	2	3	1	0	0	0	0	3	0	0	3	0	1	2	0	3	1	0
0	0	0	1	0	4	0	0	0	0	3	2	1	1	0	0	2	0	1	2	0	2	1	0	0	0	1	0	0	0	3	0	0	1	1	0	0	0	0	2	0	0	3	0	3	0	0	4	1	0
0	0	2	1	2	4	0	0	0	0	3	1	1	1	0	0	0	0	0	1	0	0	0	1	0	0	1	0	0	0	3	0	0	1	0	0	0	0	0	2	1	0	3	1	1	2	0	3	1	0
0	1	2	1	2	3	0	0	1	1	2	1	1	1	0	0	0	0	0	1	0	0	1	1	0	0	1	0	0	0	3	0	0	1	1	0	0	0	0	2	0	1	2	0	1	3	0	2	1	0
0	0	2	1	2	4	0	0	0	0	2	1	1	1	0	0	0	0	0	1	0	0	1	1	0	0	0	0	1	0	3	0	0	1	1	0	0	1	0	2	0	0	3	0	1	2	0	3	0	0
2	2	0	1	0	2	0	0	0	0	5	0	1	1	0	0	0	1	0	1	0	0	0	0	0	1	0	2	1	0	1	0	0	4	0	0	1	1	2	3	1	0	1	1	1	0	0	3	0	0
0	2	0	1	2	2	0	0	0	0	5	0	1	1	0	0	0	0	0	3	0	0	0	0	0	1	0	2	1	0	3	0	0	4	1	0	0	1	2	2	1	0	1	1	1	2	0	3	2	0
2	0	2	1	0	2	0	0	0	0	5	0	1	3	0	1	0	2	1	3	0	1	0	0	0	0	1	0	0	0	1	0	0	4	0	0	0	0	2	3	2	0	1	1	1	2	2	1	3	2
3	3	0	1	0	1	0	0	1	1	5	1	1	1	0	0	0	1	0	1	0	0	0	0	0	1	1	2	0	0	1	0	0	4	1	0	1	0	2	3	0	1	0	0	1	1	0	2	1	0
1	0	1	1	0	2	0	1	0	0	4	1	1	1	0	0	0	2	0	1	0	0	0	0	0	0	1	0	1	0	1	0	0	3	1	0	0	2	3	2	0	0	1	0	1	0	0	3	1	0
3	0	2	1	0	2	0	0	0	0	5	1	1	3	0	1	0	2	1	3	0	1	0	0	0	0	1	0	0	0	1	0	0	4	1	0	0	0	2	3	1	0	1	0	1	2	2	1	3	2
2	2	0	1	0	2	0	0	0	0	4	0	1	1	0	0	0	1	0	1	0	0	1	0	0	1	0	2	1	0	1	0	0	4	1	0	1	1	2	3	0	0	1	0	1	0	0	3	0	0
3	0	2	1	0	1	0	0	0	0	4	0	1	3	0	1	0	2	1	3	0	1	1	0	0	0	1	0	0	0	1	0	0	5	1	0	0	0	2	3	1	0	0	0	1	2	2	0	3	2
2	0	0	1	0	2	0	0	0	0	3	0	1	2	0	0	0	2	1	1	0	0	1	0	0	0	1	0	0	0	0	0	0	4	1	0	0	0	2	2	1	0	1	1	1	0	0	1	0	0
1	0	0	1	0	1	0	0	0	0	3	0	1	1	0	0	0	2	1	1	0	0	1	0	0	0	1	0	0	0	1	0	0	4	1	0	0	2	3	2	2	0	0	0	1	0	0	2	1	0
0	1	0	1	0	3	0	0	1	1	4	2	1	1	0	0	2	2	1	1	0	2	1	0	0	2	1	0	0	0	3	0	0	1	0	0	1	0	0	2	1	1	0	1	3	1	0	3	1	1
1	0	0	1	2	3	1	0	0	0	3	1	1	1	0	0	0	2	0	1	0	0	0	1	0	2	1	0	0	0	3	0	0	2	0	0	1	0	1	3	1	0	0	1	1	2	0	2	2	0
4	0	0	1	0	3	0	0	0	0	3	1	1	1	0	0	0	3	1	1	0	0	1	0	0	2	1	0	0	0	1	2	0	4	1	0	1	0	0	2	0	0	0	0	1	0	0	2	1	1
1	0	0	1	0	4	1	0	0	0	3	3	1	1	0	0	2	2	0	1	0	0	0	1	0	2	0	0	1	0	3	0	0	1	1	0	1	1	1	2	0	0	1	0	1	2	0	3	1	0
0	0	1	1	0	4	0	1	0	0	2	0	1	1	0	0	0	2	0	1	0	2	2	0	0	2	1	0	1	0	1	0	0	1	1	0	1	0	0	2	0	0	3	0	1	0	0	4	1	0
0	1	0	1	0	3	0	0	1	1	2	0	1	3	0	0	0	3	1	1	0	0	2	0	0	2	1	0	0	0	1	0	0	1	1	0	1	0	0	2	0	1	0	0	1	1	0	2	1	1
2	3	1	1	1	3	1	0	1	1	2	0	1	3	0	0	0	2	0	1	0	0	1	1	0	3	1	2	0	0	1	0	0	3	1	0	1	0	0	2	0	1	0	0	1	1	0	2	1	0
0	0	1	1	2	4	0	0	0	0	3	1	1	1	0	0	0	2	0	2	0	0	1	1	0	2	1	0	0	0	3	0	0	1	1	0	3	0	0	2	1	0	1	0	3	0	0	4	2	0
0	0	1	1	0	4	0	1	0	0	4	0	1	1	0	0	0	2	0	1	0	0	0	0	0	0	1	0	1	0	1	0	0	1	0	0	0	2	2	2	1	0	3	1	1	0	0	4	1	0
3	0	0	1	0	3	0	0	0	0	4	1	1	1	0	0	0	0	0	1	0	0	0	1	0	0	1	0	0	0	3	2	2	4	0	0	0	0	0	3	1	0	2	1	1	2	0	2	1	0
2	2	0	1	2	3	0	0	0	0	4	1	1	1	0	0	0	0	1	3	0	0	0	0	0	1	1	2	0	0	3	0	0	4	2	0	0	0	0	2	0	0	2	0	1	2	0	3	3	0
2	0	2	1	0	4	0	0	0	0	3	0	1	3	0	1	0	1	1	3	0	1	1	0	0	0	1	0	0	0	1	0	0	3	1	0	0	0	0	3	0	0	3	0	1	2	2	3	3	2
2	0	0	1	2	3	0	0	0	0	3	2	1	1	0	0	0	0	0	1	0	0	0	1	0	0	1	0	0	0	3	0	0	2	1	0	0	0	0	3	0	0	2	0	1	2	0	2	1	0
3	3	0	1	1	3	0	0	1	1	3	1	1	3	0	0	0	0	1	1	0	0	0	1	0	1	1	2	0	0	1	0	0	3	1	0	0	0	0	2	0	1	2	0	1	1	0	2	1	0
0	0	1	1	0	2	0	1	0	0	4	0	1	1	0	0	0	2	0	1	0	0	0	0	0	0	0	0	2	0	1	0	0	3	0	0	0	3	3	2	1	0	1	1	1	0	0	3	0	0
1	0	1	1	0	2	0	1	0	0	4	1	1	1	0	0	0	2	0	1	0	0	0	0	0	0	0	0	2	0	1	0	0	3	1	0	0	3	3	2	0	0	1	0	1	0	0	3	0	0
3	0	0	1	0	2	0	0	0	0	5	2	1	1	0	0	0	0	0	1	0	0	0	1	0	0	1	0	0	0	3	2	2	4	1	0	0	0	2	3	0	0	1	0	1	2	0	1	1	0
0	3	0	1	2	1	0	0	1	1	4	0	1	1	0	0	0	0	0	3	0	0	1	0	0	1	1	2	0	0	3	0	0	4	2	0	0	0	2	2	0	1	0	0	1	3	0	2	3	0
3	0	0	1	0	1	0	0	0	0	4	0	1	1	0	0	0	2	1	1	0	0	0	0	0	0	1	0	0	0	1	2	0	5	0	0	0	0	2	2	2	0	0	1	1	0	0	0	1	0
2	1	0	1	0	1	0	0	1	1	4	0	1	3	0	0	0	2	1	1	0	0	0	0	0	0	1	0	0	0	1	0	0	4	0	0	0	0	2	2	2	1	0	1	1	1	0	0	1	0
1	0	0	1	0	2	0	0	0	0	3	0	1	1	0	0	0	1	1	1	0	0	1	0	0	0	1	0	0	0	1	0	0	5	1	0	0	0	2	2	1	0	0	0	1	0	0	2	1	0
3	0	0	1	0	3	0	0	0	0	3	0	1	3	0	0	0	3	1	1	0	0	1	0	0	2	1	0	0	0	1	0	0	4	0	0	1	0	0	2	1	0	0	1	1	0	0	2	1	1
0	0	1	1	0	4	0	1	0	0	3	0	1	1	0	0	0	3	0	1	0	0	1	0	0	2	0	0	2	0	1	0	0	1	0	0	1	3	2	2	1	0	1	1	1	0	0	4	0	0
2	0	0	1	0	4	1	0	0	0	4	1	1	1	0	0	0	2	0	1	0	0	0	1	0	2	0	0	1	0	3	2	2	3	0	0	1	1	1	3	1	0	1	1	1	2	0	3	1	0
3	2	0	1	0	3	0	0	2	0	4	0	1	1	0	0	2	2	0	3	0	0	1	0	0	2	1	0	0	0	1	0	0	4	0	0	1	1	2	3	2	0	2	2	1	0	0	3	1	0
0	0	1	1	2	4	0	0	0	0	4	1	1	0	0	0	0	2	0	2	0	0	0	1	0	2	1	0	0	0	2	0	0	1	0	0	3	0	0	2	2	0	1	2	3	0	0	4	1	0
1	1	0	1	0	3	1	2	3	1	4	2	1	1	0	0	0	2	0	1	0	0	0	1	0	2	1	2	0	0	3	0	0	1	1	0	3	0	1	2	0	1	0	0	1	3	0	2	2	0
1	0	0	1	0	4	0	0	0	0	4	3	1	0	0	0	2	2	1	1	0	2	1	0	0	2	1	0	0	0	2	0	0	1	1	0	1	0	0	2	0	0	1	1	3	0	0	4	0	1
1	0	0	1	0	4	0	0	0	0	3	1	1	0	0	0	0	2	1	1	0	0	1	0	0	2	1	0	0	0	0	0	0	3	1	0	1	0	0	2	0	0	1	1	1	0	0	4	0	1
0	0	1	1	0	4	0	1	0	0	2	0	1	1	0	0	0	2	0	1	0	2	2	0	0	2	0	0	2	0	1	0	0	1	1	0	1	1	0	2	0	0	3	0	1	0	0	4	0	0
0	0	0	1	0	4	1	2	2	0	3	1	1	1	0	0	0	2	0	1	0	0	1	1	0	2	1	2	0	0	3	0	0	1	1	0	3	0	1	2	0	0	1	0	1	2	0	3	2	0
2	1	2	1	0	3	0	0	1	1	3	0	1	3	0	1	0	3	1	3	0	0	2	0	0	2	1	0	0	0	1	0	0	3	1	0	1	0	0	3	0	1	0	0	1	3	2	2	3	2
0	0	0	1	0	4	0	0	0	0	2	0	1	1	0	0	0	2	1	1	0	0	2	0	0	2	0	0	1	0	1	0	0	3	1	0	1	1	0	2	0	0	1	0	1	0	0	4	0	1
2	0	2	1	0	4	0	0	0	0	4	0	1	3	0	1	0	1	1	3	0	1	0	0	0	0	1	0	0	0	1	0	0	3	0	0	0	0	0	3	1	0	3	1	1	2	2	3	3	2
2	0	1	1	0	3	0	1	0	0	4	1	1	1	0	0	0	2	0	1	0	0	0	0	0	0	1	0	1	0	1	0	0	2	1	0	0	2	2	2	0	0	2	0	1	0	0	3	1	0
1	1	1	1	0	3	0	1	1	1	4	1	1	1	0	0	0	2	0	1	0	0	0	0	0	0	1	0	1	0	1	0	0	1	1	0	0	2	2	2	0	1	2	0	1	1	0	3	1	0
3	1	0	1	0	3	0	0	1	1	4	2	1	1	0	0	0	0	0	1	0	0	0	1	0	0	1	0	0	0	3	2	2	3	1	0	0	0	0	3	0	1	2	0	1	3	0	2	1	0
2	0	0	1	0	3	0	0	0	0	4	3	1	1	0	0	2	0	1	2	0	2	0	0	0	0	1	0	0	0	3	0	0	2	1	0	0	0	0	2	0	0	2	0	3	0	0	3	1	0
3	0	2	1	0	3	0	0	0	0	3	0	1	3	0	1	0	1	1	3	0	1	1	0	0	0	1	0	0	0	1	0	0	4	1	0	0	0	0	3	0	0	2	0	1	2	2	2	3	2
0	0	2	1	2	4	0	0	0	0	3	1	1	1	0	0	0	0	0	1	0	0	0	1	0	0	0	0	1	0	3	0	0	1	0	0	0	1	0	2	1	0	3	1	1	2	0	3	0	0
0	0	0	1	0	4	0	0	0	0	4	1	3	1	0	0	0	0	0	3	0	0	0	1	0	0	0	0	1	0	3	0	0	1	0	0	0	1	0	3	1	2	4	1	1	2	0	4	0	0
3	2	0	1	0	3	0	0	2	0	4	0	1	1	0	0	2	0	0	3	0	0	0	0	0	0	1	0	0	0	1	0	0	4	0	0	0	1	2	3	1	0	3	2	1	0	0	3	1	0
4	2	0	1	0	3	0	0	2	0	4	1	1	1	0	0	2	0	0	3	0	0	0	0	0	0	1	0	0	0	1	0	0	4	1	0	0	1	2	3	0	0	3	1	1	0	0	3	1	0
3	2	0	1	1	4	0	0	0	0	3	1	1	3	0	0	0	0	1	1	0	0	0	1	0	1	0	2	1	0	1	0	0	3	1	0	0	1	0	2	0	0	3	0	1	0	0	3	0	0
2	3	0	1	1	3	0	0	1	1	2	0	1	3	0	0	0	0	1	1	0	0	1	1	0	1	1	2	0	0	1	0	0	3	1	0	0	0	0	2	0	1	2	0	1	1	0	2	1	0
3	0	0	1	0	1	0	0	0	0	5	1	1	1	0	0	0	0	0	1	0	0	0	1	0	0	1	0	0	0	3	2	2	5	0	0	0	0	2	3	1	0	0	1	1	2	0	0	1	0
3	2	0	1	0	2	0	0	0	0	5	1	1	0	0	0	0	1	0	1	0	0	0	0	0	1	1	2	0	0	0	0	0	4	1	0	1	0	2	3	0	0	1	1	1	0	0	3	0	0
2	3	0	1	0	1	0	0	1	1	4	0	1	1	0	0	0	1	0	1	0	0	1	0	0	1	1	2	0	0	1	0	0	4	1	0	1	0	2	3	0	1	0	0	1	1	0	2	1	0
2	0	0	1	0	2	0	0	0	0	3	0	1	1	0	0	0	2	1	1	0	0	1	0	0	0	1	0	0	0	1	2	0	4	1	0	0	0	2	2	1	0	1	0	1	0	0	1	1	0
0	0	0	1	0	3	0	0	0	0	3	0	1	3	0	0	0	2	1	1	0	0	1	0	0	0	0	0	1	0	1	0	0	3	1	0	0	1	2	2	1	0	1	0	1	0	0	1	0	0
[truncated: 85 more columns]

## Sheet: Figure S9_GBT_smiles
0	1	2	3	4	5	6	7	8	9	10	11	12	13	14	15	16	17	18	19	20	21	22	23	24	25	26	27	28	29	30	31	32	33	34	35	36	37	38	39	40	41	42	43	44	45	46	47	48	49
0	0	0	1	0	4	0	0	0	0	3	0	1	2	0	0	0	3	1	1	0	0	1	0	0	2	1	0	0	0	0	0	0	1	0	0	1	0	0	2	1	0	1	2	1	0	0	3	0	1
1	0	0	1	0	4	1	0	0	0	3	3	1	1	0	0	2	2	0	1	0	0	0	1	0	2	1	0	0	0	3	0	0	1	1	0	1	0	1	2	0	0	1	0	1	2	0	3	2	0
3	3	1	1	1	3	1	0	1	1	3	1	1	3	0	0	0	2	0	1	0	0	0	1	0	3	1	2	0	0	1	0	0	3	1	0	1	0	0	2	0	1	0	0	1	1	0	2	1	0
2	0	0	1	0	4	1	0	0	0	3	1	1	1	0	0	0	2	0	1	0	0	1	1	0	2	0	0	1	0	3	2	2	3	1	0	1	1	1	3	0	0	1	0	1	2	0	3	1	0
2	0	0	1	0	4	1	0	0	0	3	1	1	0	0	0	0	2	0	1	0	0	1	1	0	2	1	0	0	0	2	2	2	3	1	0	1	0	1	3	0	0	1	1	1	2	0	3	1	0
0	0	1	1	0	4	0	1	0	0	2	0	1	0	0	0	0	2	0	1	0	2	2	0	0	2	1	0	1	0	0	0	0	1	1	0	1	0	0	2	0	0	3	1	1	0	0	4	0	0
0	0	0	1	0	4	1	2	2	0	3	1	1	1	0	0	0	2	0	1	0	0	1	1	0	2	0	2	1	0	3	0	0	1	1	0	3	1	1	2	0	0	1	0	1	2	0	3	1	0
1	0	0	1	0	3	0	0	0	0	2	0	1	3	0	0	0	3	1	1	0	0	2	0	0	2	1	0	0	0	1	0	0	2	1	0	1	0	0	2	0	0	0	0	1	0	0	2	1	1
1	0	1	1	0	3	0	1	0	0	4	0	1	1	0	0	0	2	0	1	0	0	0	0	0	0	1	0	1	0	1	0	0	2	0	0	0	2	2	2	1	0	2	1	1	0	0	3	1	0
1	2	0	1	2	3	0	0	0	0	4	0	1	1	0	0	0	0	1	3	0	0	0	0	0	1	1	2	0	0	3	0	0	4	1	0	0	0	0	2	1	0	2	1	1	2	0	3	3	0
4	0	0	1	0	3	0	0	0	0	4	2	1	1	0	0	0	0	0	1	0	0	0	1	0	0	1	0	0	0	3	2	2	4	1	0	0	0	0	3	0	0	2	0	1	2	0	2	1	0
1	1	0	1	0	3	0	0	1	1	4	3	1	1	0	0	2	0	1	2	0	2	0	0	0	0	1	0	0	0	3	0	0	1	1	0	0	0	0	2	0	1	2	0	3	1	0	3	1	0
1	0	0	1	0	4	0	0	0	0	4	3	1	0	0	0	2	0	1	2	0	2	0	0	0	0	1	0	0	0	2	0	0	1	1	0	0	0	0	2	0	0	3	1	3	0	0	4	0	0
3	2	0	1	0	4	0	0	2	0	4	1	1	0	0	0	2	0	0	3	0	0	0	0	0	0	1	0	0	0	0	0	0	3	1	0	0	1	2	3	0	0	4	2	1	0	0	4	0	0
2	2	0	1	0	2	0	0	0	0	4	0	1	1	0	0	0	1	0	1	0	0	1	0	0	1	1	2	0	0	1	0	0	4	1	0	1	0	2	3	0	0	1	0	1	0	0	3	1	0
1	0	1	1	0	1	0	1	0	0	3	0	1	1	0	0	0	2	0	1	0	0	1	0	0	0	1	0	1	0	1	0	0	4	1	0	0	2	3	2	0	0	0	0	1	0	0	2	1	0
0	0	1	1	0	2	0	1	0	0	3	0	1	1	0	0	0	2	0	1	0	0	1	0	0	0	0	0	2	0	1	0	0	3	1	0	0	3	3	2	0	0	1	0	1	0	0	3	0	0
0	2	0	1	2	2	0	0	0	0	4	0	1	1	0	0	0	0	0	3	0	0	1	0	0	1	0	2	1	0	3	0	0	4	2	0	0	1	2	2	0	0	1	0	1	2	0	3	2	0
2	0	2	1	0	2	0	0	0	0	4	0	1	2	0	1	0	2	1	3	0	1	1	0	0	0	1	0	0	0	0	0	0	4	1	0	0	0	2	3	1	0	1	1	1	2	2	1	2	2
0	1	0	1	0	1	0	0	1	1	4	0	1	1	0	0	0	2	1	1	0	0	0	0	0	0	1	0	0	0	1	0	0	3	0	0	0	2	3	2	3	1	0	1	1	1	0	2	1	0
1	0	0	1	0	3	0	0	0	0	4	1	1	1	0	0	0	1	1	1	0	0	0	0	0	0	1	0	0	0	1	0	0	4	1	0	0	0	2	2	1	0	1	0	1	0	0	3	1	0
1	0	0	1	0	3	0	0	0	0	4	1	1	0	0	0	0	1	1	1	0	0	0	0	0	0	1	0	0	0	0	0	0	4	1	0	0	0	2	2	1	0	1	1	1	0	0	3	0	0
0	0	0	1	0	3	0	0	0	0	3	0	1	1	0	0	0	1	1	1	0	0	1	0	0	0	1	0	0	0	1	0	0	4	1	0	0	0	2	2	1	0	1	0	1	0	0	3	1	0
0	0	0	1	0	4	0	0	0	0	3	0	1	3	0	0	0	3	1	1	0	0	1	0	0	2	0	0	1	0	1	0	0	1	0	0	1	1	0	2	1	0	1	1	1	0	0	3	0	1
2	3	1	1	1	3	1	0	1	1	3	0	1	3	0	0	0	2	0	1	0	0	0	1	0	3	1	2	0	0	1	0	0	3	0	0	1	0	0	2	1	1	0	1	1	1	0	2	1	0
1	0	0	1	0	4	0	0	0	0	3	1	1	3	0	0	0	3	1	1	0	0	1	0	0	2	0	0	1	0	1	0	0	1	1	0	1	1	0	2	0	0	1	0	1	0	0	3	0	1
2	0	0	1	0	3	1	0	0	0	3	3	1	1	0	0	2	2	0	1	0	0	0	1	0	2	1	0	0	0	3	0	0	2	1	0	1	0	1	2	0	0	0	0	1	2	0	2	2	0
2	0	2	1	0	4	0	0	0	0	3	0	1	3	0	1	0	3	1	3	0	0	2	0	0	2	1	0	0	0	1	0	0	3	1	0	1	0	0	3	0	0	1	0	1	2	2	3	3	2
0	0	0	1	0	4	0	0	0	0	2	0	1	1	0	0	0	2	1	1	0	0	2	0	0	2	1	0	0	0	1	0	0	3	1	0	1	0	0	2	0	0	1	0	1	0	0	4	1	1
2	2	0	1	0	4	0	0	0	0	4	0	1	0	0	0	0	1	0	1	0	0	0	0	0	1	1	2	0	0	0	0	0	3	0	0	0	0	0	3	1	0	3	2	1	0	0	4	0	0
3	2	0	1	0	4	0	0	0	0	4	1	1	1	0	0	0	1	0	1	0	0	0	0	0	1	0	2	1	0	1	0	0	3	1	0	0	1	0	3	0	0	3	0	1	0	0	4	0	0
1	0	1	1	0	4	0	1	0	0	4	1	1	0	0	0	0	2	0	1	0	0	0	0	0	0	1	0	1	0	0	0	0	1	1	0	0	2	2	2	0	0	3	1	1	0	0	4	0	0
3	0	0	1	0	4	0	0	0	0	4	2	1	1	0	0	0	0	0	1	0	0	0	1	0	0	1	0	0	0	3	2	2	3	1	0	0	0	0	3	0	0	3	0	1	2	0	3	1	0
3	0	0	1	0	4	0	0	0	0	4	2	1	1	0	0	0	0	0	1	0	0	0	1	0	0	0	0	1	0	3	2	2	3	1	0	0	1	0	3	0	0	3	0	1	2	0	3	0	0
0	2	0	1	2	4	0	0	0	0	3	0	1	1	0	0	0	0	1	3	0	0	1	0	0	1	0	2	1	0	3	0	0	3	2	0	0	1	0	2	0	0	3	0	1	2	0	4	2	0
2	0	2	1	0	4	0	0	0	0	3	0	1	3	0	1	0	1	1	3	0	1	1	0	0	0	0	0	1	0	1	0	0	3	1	0	0	1	0	3	0	0	3	0	1	2	2	3	2	2
2	2	0	1	0	4	0	0	2	0	4	0	1	1	0	0	2	0	0	3	0	0	0	0	0	0	1	0	0	0	1	0	0	3	0	0	0	1	2	3	1	0	4	2	1	0	0	4	1	0
0	1	0	1	2	3	0	0	1	1	3	1	1	1	0	0	0	0	0	1	0	0	0	1	0	0	1	0	0	0	3	0	0	1	0	0	0	0	0	3	1	1	2	1	1	3	0	2	1	0
1	0	0	1	0	4	0	0	0	0	4	2	3	0	0	0	0	0	0	3	0	0	0	1	0	0	1	0	0	0	2	0	0	1	1	0	0	0	0	3	0	2	4	1	1	2	0	4	0	0
1	0	0	1	0	3	0	0	0	0	3	1	3	1	0	0	0	0	0	3	0	0	1	1	0	0	1	0	0	0	3	0	0	2	1	0	0	0	0	3	0	2	3	0	1	2	0	3	1	0
2	2	0	1	0	4	0	0	2	0	3	0	1	1	0	0	2	0	0	3	0	0	1	0	0	0	0	0	1	0	1	0	0	3	1	0	0	2	2	3	0	0	4	1	1	0	0	4	0	0
2	0	0	1	0	2	0	0	0	0	4	0	1	1	0	0	0	2	1	1	0	0	0	0	0	0	1	0	0	0	1	2	0	4	0	0	0	0	2	2	2	0	1	1	1	0	0	1	1	0
3	0	0	1	0	1	0	0	0	0	4	0	1	3	0	0	0	2	1	1	0	0	0	0	0	0	1	0	0	0	1	0	0	5	0	0	0	0	2	2	2	0	0	1	1	0	0	0	1	0
3	1	0	1	0	1	0	0	1	1	4	1	1	3	0	0	0	2	1	1	0	0	0	0	0	0	1	0	0	0	1	0	0	4	1	0	0	0	2	2	1	1	0	0	1	1	0	0	1	0
0	2	0	1	2	4	0	0	0	0	4	0	1	1	0	0	0	0	1	3	0	0	0	0	0	1	1	2	0	0	3	0	0	3	1	0	0	0	0	2	1	0	3	1	1	2	0	4	3	0
2	0	2	1	0	4	0	0	0	0	4	0	1	3	0	1	0	1	1	3	0	1	0	0	0	0	0	0	1	0	1	0	0	3	0	0	0	1	0	3	1	0	3	1	1	2	2	3	2	2
1	0	1	1	0	4	0	1	0	0	4	1	1	1	0	0	0	2	0	1	0	0	0	0	0	0	1	0	1	0	1	0	0	1	1	0	0	2	2	2	0	0	3	0	1	0	0	4	1	0
0	0	1	1	0	4	0	1	0	0	3	0	1	1	0	0	0	2	0	1	0	0	1	0	0	0	1	0	1	0	1	0	0	1	1	0	0	2	2	2	0	0	3	0	1	0	0	4	1	0
0	0	0	1	0	4	0	0	0	0	3	2	1	0	0	0	2	0	1	2	0	2	1	0	0	0	1	0	0	0	2	0	0	1	1	0	0	0	0	2	0	0	3	1	3	0	0	4	0	0
1	1	2	1	2	3	0	0	1	1	3	2	1	1	0	0	0	0	0	1	0	0	0	1	0	0	1	0	0	0	3	0	0	1	1	0	0	0	0	2	0	1	2	0	1	3	0	2	1	0
1	0	2	1	2	4	0	0	0	0	3	2	1	1	0	0	0	0	0	1	0	0	0	1	0	0	0	0	1	0	3	0	0	1	1	0	0	1	0	2	0	0	3	0	1	2	0	3	0	0
1	0	0	1	2	4	0	0	0	0	3	2	1	1	0	0	0	0	0	1	0	0	0	1	0	0	0	0	1	0	3	0	0	1	1	0	0	1	0	3	0	0	3	0	1	2	0	3	0	0
2	2	0	1	1	4	0	0	0	0	2	0	1	2	0	0	0	0	1	1	0	0	1	1	0	1	1	2	0	0	0	0	0	3	1	0	0	0	0	2	0	0	3	1	1	0	0	3	0	0
2	2	0	1	0	2	0	0	0	0	5	0	1	0	0	0	0	1	0	1	0	0	0	0	0	1	1	2	0	0	0	0	0	4	0	0	1	0	2	3	1	0	1	2	1	0	0	3	0	0
1	1	1	1	0	1	0	1	1	1	4	1	1	1	0	0	0	2	0	1	0	0	0	0	0	0	1	0	1	0	1	0	0	3	1	0	0	2	3	2	0	1	0	0	1	1	0	2	1	0
3	1	0	1	0	1	0	0	1	1	5	2	1	1	0	0	0	0	0	1	0	0	0	1	0	0	1	0	0	0	3	2	2	4	1	0	0	0	2	3	0	1	0	0	1	3	0	0	1	0
1	1	0	1	0	2	0	0	1	1	5	3	1	1	0	0	2	1	1	1	0	2	0	0	0	0	1	0	0	0	3	0	0	3	1	0	0	0	2	2	1	1	0	0	3	1	0	2	1	0
0	1	1	1	0	1	0	1	1	1	3	0	1	1	0	0	0	2	0	1	0	0	1	0	0	0	1	0	1	0	1	0	0	3	1	0	0	2	3	2	0	1	0	0	1	1	0	2	1	0
0	1	0	1	0	2	0	0	1	1	4	0	1	3	0	0	0	2	1	1	0	0	0	0	0	0	1	0	0	0	1	0	0	3	0	0	0	0	2	2	2	1	0	1	1	1	0	0	1	0
2	0	0	1	0	2	0	0	0	0	4	0	1	3	0	0	0	2	1	1	0	0	0	0	0	0	0	0	1	0	1	0	0	4	0	0	0	1	2	2	2	0	1	1	1	0	0	1	0	0
2	1	0	1	0	1	0	0	1	1	3	0	1	1	0	0	0	2	1	1	0	0	1	0	0	0	1	0	0	0	1	2	0	4	1	0	0	0	2	2	1	1	0	0	1	1	0	0	1	0
0	0	1	1	0	4	0	1	0	0	3	0	1	1	0	0	0	2	0	1	0	2	1	0	0	2	0	0	2	0	1	0	0	1	0	0	1	1	0	2	1	0	3	1	1	0	0	4	0	0
0	0	0	1	0	4	1	2	2	0	4	1	1	1	0	0	0	2	0	1	0	0	0	1	0	2	0	2	1	0	3	0	0	1	0	0	3	1	1	2	1	0	1	1	1	2	0	3	1	0
2	2	1	1	2	3	1	0	0	0	4	1	1	1	0	0	0	2	0	3	0	0	0	0	0	3	1	2	0	0	3	0	0	4	2	0	1	0	0	2	0	0	0	0	1	2	0	3	3	0
1	0	0	1	0	3	1	2	2	0	3	1	1	1	0	0	0	2	0	1	0	0	1	1	0	2	1	2	0	0	3	0	0	2	1	0	3	0	1	2	0	0	0	0	1	2	0	2	2	0
0	1	0	1	0	3	0	0	1	1	3	2	1	1	0	0	2	2	1	1	0	2	2	0	0	2	1	0	0	0	3	0	0	1	1	0	1	0	0	2	0	1	0	0	3	1	0	3	1	1
2	0	0	1	0	4	0	0	0	0	2	0	1	1	0	0	0	3	1	1	0	0	2	0	0	2	0	0	1	0	1	2	0	3	1	0	1	1	0	2	0	0	1	0	1	0	0	3	0	1
0	1	0	1	0	3	0	0	1	1	2	0	1	1	0	0	0	2	1	1	0	0	2	0	0	2	1	0	0	0	1	0	0	3	1	0	1	0	0	2	0	1	0	0	1	1	0	3	1	1
0	0	1	1	2	4	0	0	0	0	3	1	1	0	0	0	0	2	0	2	0	0	1	1	0	2	1	0	0	0	2	0	0	1	1	0	3	0	0	2	1	0	1	1	3	0	0	4	1	0
0	0	2	1	2	4	0	0	0	0	3	1	1	0	0	0	0	0	0	1	0	0	0	1	0	0	1	0	0	0	2	0	0	1	0	0	0	0	0	2	1	0	3	2	1	2	0	3	0	0
1	0	0	1	2	3	0	0	0	0	3	1	1	1	0	0	0	0	0	1	0	0	0	1	0	0	1	0	0	0	3	0	0	2	0	0	0	0	0	3	1	0	2	1	1	2	0	2	1	0
0	0	0	1	2	4	0	0	0	0	3	1	1	0	0	0	0	0	0	1	0	0	0	1	0	0	1	0	0	0	2	0	0	1	0	0	0	0	0	3	1	0	3	2	1	2	0	3	0	0
2	3	0	1	1	3	0	0	1	1	3	0	1	3	0	0	0	0	1	1	0	0	0	1	0	1	1	2	0	0	1	0	0	3	0	0	0	0	0	2	1	1	2	1	1	1	0	2	1	0
2	2	0	1	1	4	0	0	0	0	3	0	1	2	0	0	0	0	1	1	0	0	0	1	0	1	1	2	0	0	0	0	0	3	0	0	0	0	0	2	1	0	3	2	1	0	0	3	0	0
0	0	0	1	0	4	0	0	0	0	3	1	3	1	0	0	0	0	0	3	0	0	1	1	0	0	1	0	0	0	3	0	0	1	1	0	0	0	0	3	0	2	4	0	1	2	0	4	1	0
2	3	0	1	0	1	0	0	1	1	5	0	1	1	0	0	0	1	0	1	0	0	0	0	0	1	1	2	0	0	1	0	0	4	0	0	1	0	2	3	1	1	0	1	1	1	0	2	1	0
0	1	1	1	0	1	0	1	1	1	4	0	1	1	0	0	0	2	0	1	0	0	0	0	0	0	1	0	1	0	1	0	0	3	0	0	0	2	3	2	1	1	0	1	1	1	0	2	1	0
1	0	0	1	0	2	0	0	0	0	5	2	1	1	0	0	2	1	1	1	0	2	0	0	0	0	1	0	0	0	3	0	0	4	0	0	0	0	2	2	2	0	0	1	3	0	0	2	1	0
3	0	2	1	0	2	0	0	0	0	5	1	1	3	0	1	0	2	1	3	0	1	0	0	0	0	0	0	1	0	1	0	0	4	1	0	0	1	2	3	1	0	1	0	1	2	2	1	2	2
2	0	0	1	0	2	0	0	0	0	4	1	1	0	0	0	0	0	0	1	0	0	1	1	0	0	1	0	0	0	2	2	2	4	1	0	0	0	2	3	0	0	1	1	1	2	0	1	0	0
2	1	2	1	0	1	0	0	1	1	4	0	1	3	0	1	0	2	1	3	0	1	1	0	0	0	1	0	0	0	1	0	0	4	1	0	0	0	2	3	1	1	0	0	1	3	2	0	3	2
0	0	0	1	0	2	0	0	0	0	3	0	1	1	0	0	0	2	1	1	0	0	1	0	0	0	1	0	0	0	1	0	0	3	1	0	0	2	3	2	2	0	1	0	1	0	0	3	1	0
0	2	1	1	2	4	1	0	0	0	4	0	1	1	0	0	0	2	0	3	0	0	0	0	0	3	1	2	0	0	3	0	0	3	1	0	1	0	0	2	1	0	1	1	1	2	0	4	3	0
0	0	1	1	0	4	0	1	0	0	3	0	1	0	0	0	0	2	0	1	0	2	1	0	0	2	1	0	1	0	0	0	0	1	0	0	1	0	0	2	1	0	3	2	1	0	0	4	0	0
0	0	0	1	0	4	1	2	2	0	4	1	1	1	0	0	0	2	0	1	0	0	0	1	0	2	1	2	0	0	3	0	0	1	0	0	3	0	1	2	1	0	1	1	1	2	0	3	2	0
2	2	1	1	1	4	1	0	0	0	3	0	1	3	0	0	0	2	0	1	0	0	0	1	0	3	0	2	1	0	1	0	0	3	0	0	1	1	0	2	1	0	1	1	1	0	0	3	0	0
0	0	1	1	2	4	0	0	0	0	4	1	1	1	0	0	0	2	0	2	0	0	0	1	0	2	1	0	0	0	3	0	0	1	0	0	3	0	0	2	2	0	1	1	3	0	0	4	2	0
1	0	1	1	0	4	0	1	0	0	3	1	1	1	0	0	0	2	0	1	0	2	1	0	0	2	1	0	1	0	1	0	0	1	1	0	1	0	0	2	0	0	3	0	1	0	0	4	1	0
1	0	0	1	0	4	0	0	0	0	4	3	1	1	0	0	2	2	1	1	0	2	1	0	0	2	1	0	0	0	3	0	0	1	1	0	1	0	0	2	0	0	1	0	3	0	0	4	1	1
1	0	0	1	0	4	1	0	0	0	4	2	3	1	0	0	0	2	0	3	0	0	0	1	0	2	1	0	0	0	3	0	0	1	1	0	1	0	1	3	0	2	3	0	1	2	0	4	2	0
3	3	0	1	0	3	0	0	3	1	4	1	1	1	0	0	2	2	0	3	0	0	1	0	0	2	1	0	0	0	1	0	0	3	1	0	1	1	2	3	1	1	2	1	1	1	0	3	1	0
0	0	0	1	0	4	0	0	0	0	3	2	1	0	0	0	2	2	1	1	0	2	2	0	0	2	1	0	0	0	2	0	0	1	1	0	1	0	0	2	0	0	1	1	3	0	0	4	0	1
3	0	2	1	0	3	0	0	0	0	3	0	1	3	0	1	0	3	1	3	0	0	2	0	0	2	1	0	0	0	1	0	0	4	1	0	1	0	0	3	0	0	0	0	1	2	2	2	3	2
2	0	0	1	0	4	0	0	0	0	4	1	1	1	0	0	0	0	0	1	0	0	0	1	0	0	0	0	1	0	3	2	2	3	0	0	0	1	0	3	1	0	3	1	1	2	0	3	0	0
0	3	0	1	2	3	0	0	1	1	4	0	1	1	0	0	0	0	1	3	0	0	0	0	0	1	1	2	0	0	3	0	0	3	1	0	0	0	0	2	1	1	2	1	1	3	0	3	3	0
2	1	2	1	0	3	0	0	1	1	4	0	1	3	0	1	0	1	1	3	0	1	0	0	0	0	1	0	0	0	1	0	0	3	0	0	0	0	0	3	1	1	2	1	1	3	2	2	3	2
1	0	0	1	0	4	0	0	0	0	4	3	1	1	0	0	2	0	1	2	0	2	0	0	0	0	1	0	0	0	3	0	0	1	1	0	0	0	0	2	0	0	3	0	3	0	0	4	1	0
0	1	1	1	0	3	0	1	1	1	3	0	1	1	0	0	0	2	0	1	0	0	1	0	0	0	1	0	1	0	1	0	0	1	1	0	0	2	2	2	0	1	2	0	1	1	0	3	1	0
2	0	2	1	2	3	0	0	0	0	3	2	1	1	0	0	0	0	0	1	0	0	0	1	0	0	1	0	0	0	3	0	0	2	1	0	0	0	0	2	0	0	2	0	1	2	0	2	1	0
0	0	2	1	2	4	0	0	0	0	2	1	1	0	0	0	0	0	0	1	0	0	1	1	0	0	1	0	0	0	2	0	0	1	1	0	0	0	0	2	0	0	3	1	1	2	0	3	0	0
2	0	0	1	0	2	0	0	0	0	5	1	1	0	0	0	0	0	0	1	0	0	0	1	0	0	1	0	0	0	2	2	2	4	0	0	0	0	2	3	1	0	1	2	1	2	0	1	0	0
0	1	0	1	0	2	0	0	1	1	5	2	1	1	0	0	2	1	1	1	0	2	0	0	0	0	1	0	0	0	3	0	0	3	0	0	0	0	2	2	2	1	0	1	3	1	0	2	1	0
2	1	2	1	0	1	0	0	1	1	5	0	1	3	0	1	0	2	1	3	0	1	0	0	0	0	1	0	0	0	1	0	0	4	0	0	0	0	2	3	2	1	0	1	1	3	2	0	3	2
4	0	0	1	0	1	0	0	0	0	5	2	1	1	0	0	0	0	0	1	0	0	0	1	0	0	1	0	0	0	3	2	2	5	1	0	0	0	2	3	0	0	0	0	1	2	0	0	1	0
1	3	0	1	2	1	0	0	1	1	5	1	1	1	0	0	0	0	0	3	0	0	0	0	0	1	1	2	0	0	3	0	0	4	2	0	0	0	2	2	0	1	0	0	1	3	0	2	3	0
1	2	0	1	2	1	0	0	0	0	4	0	1	1	0	0	0	0	0	3	0	0	1	0	0	1	1	2	0	0	3	0	0	5	2	0	0	0	2	2	0	0	0	0	1	2	0	2	3	0
0	0	0	1	0	3	0	0	0	0	4	0	1	3	0	0	0	2	1	1	0	0	0	0	0	0	1	0	0	0	1	0	0	3	0	0	0	0	2	2	2	0	1	1	1	0	0	1	1	0
0	0	1	1	0	4	0	1	0	0	3	0	1	0	0	0	0	3	0	1	0	0	1	0	0	2	1	0	1	0	0	0	0	1	0	0	1	2	2	2	1	0	1	2	1	0	0	4	0	0
1	0	0	1	0	3	1	0	0	0	4	1	3	1	0	0	0	2	0	3	0	0	0	1	0	2	1	0	0	0	3	0	0	2	0	0	1	0	1	3	1	2	2	1	1	2	0	3	2	0
0	0	0	1	0	4	1	0	0	0	4	1	3	1	0	0	0	2	0	3	0	0	0	1	0	2	0	0	1	0	3	0	0	1	0	0	1	1	1	3	1	2	3	1	1	2	0	4	1	0
3	2	1	1	1	3	1	0	0	0	3	0	1	3	0	0	0	2	0	1	0	0	0	1	0	3	1	2	0	0	1	0	0	4	0	0	1	0	0	2	1	0	0	1	1	0	0	2	1	0
0	0	1	1	2	4	0	0	0	0	4	1	1	1	0	0	0	2	0	2	0	0	0	1	0	2	0	0	1	0	3	0	0	1	0	0	3	1	0	2	2	0	1	1	3	0	0	4	1	0
4	0	0	1	0	3	1	0	0	0	4	2	1	1	0	0	0	2	0	1	0	0	0	1	0	2	1	0	0	0	3	2	2	4	1	0	1	0	1	3	0	0	0	0	1	2	0	2	2	0
1	0	0	1	0	4	1	2	2	0	4	2	1	0	0	0	0	2	0	1	0	0	0	1	0	2	1	2	0	0	2	0	0	1	1	0	3	0	1	2	0	0	1	1	1	2	0	3	1	0
1	2	1	1	2	4	1	0	0	0	4	1	1	0	0	0	0	2	0	3	0	0	0	0	0	3	1	2	0	0	2	0	0	3	2	0	1	0	0	2	0	0	1	1	1	2	0	4	2	0
3	0	2	1	0	4	0	0	0	0	4	1	1	2	0	1	0	3	1	3	0	0	1	0	0	2	1	0	0	0	0	0	0	3	1	0	1	0	0	3	0	0	1	1	1	2	2	3	2	2
3	2	1	1	1	4	1	0	0	0	3	1	1	3	0	0	0	2	0	1	0	0	0	1	0	3	1	2	0	0	1	0	0	3	1	0	1	0	0	2	0	0	1	0	1	0	0	3	1	0
0	0	0	1	0	4	0	0	0	0	3	2	1	1	0	0	2	2	1	1	0	2	2	0	0	2	0	0	1	0	3	0	0	1	1	0	1	1	0	2	0	0	1	0	3	0	0	4	0	1
0	2	1	1	2	4	1	0	0	0	3	0	1	1	0	0	0	2	0	3	0	0	1	0	0	3	1	2	0	0	3	0	0	3	2	0	1	0	0	2	0	0	1	0	1	2	0	4	3	0
2	1	0	1	0	3	0	0	1	1	2	0	1	1	0	0	0	3	1	1	0	0	2	0	0	2	1	0	0	0	1	2	0	3	1	0	1	0	0	2	0	1	0	0	1	1	0	2	1	1
2	0	0	1	0	4	0	0	0	0	2	0	1	0	0	0	0	3	1	1	0	0	2	0	0	2	1	0	0	0	0	2	0	3	1	0	1	0	0	2	0	0	1	1	1	0	0	3	0	1
0	0	0	1	0	4	0	0	0	0	4	2	1	1	0	0	2	0	1	2	0	2	0	0	0	0	0	0	1	0	3	0	0	1	0	0	0	1	0	2	1	0	3	1	3	0	0	4	0	0
1	2	0	1	2	4	0	0	0	0	4	1	1	1	0	0	0	0	1	3	0	0	0	0	0	1	0	2	1	0	3	0	0	3	2	0	0	1	0	2	0	0	3	0	1	2	0	4	2	0
3	2	0	1	1	3	0	0	0	0	3	0	1	3	0	0	0	0	1	1	0	0	0	1	0	1	1	2	0	0	1	0	0	4	0	0	0	0	0	2	1	0	2	1	1	0	0	2	1	0
1	0	2	1	2	4	0	0	0	0	3	2	1	0	0	0	0	0	0	1	0	0	0	1	0	0	1	0	0	0	2	0	0	1	1	0	0	0	0	2	0	0	3	1	1	2	0	3	0	0
1	1	0	1	0	3	0	0	1	1	4	2	3	1	0	0	0	0	0	3	0	0	0	1	0	0	1	0	0	0	3	0	0	1	1	0	0	0	0	3	0	3	3	0	1	3	0	3	1	0
3	2	0	1	0	4	0	0	2	0	4	1	1	1	0	0	2	0	0	3	0	0	0	0	0	0	1	0	0	0	1	0	0	3	1	0	0	1	2	3	0	0	4	1	1	0	0	4	1	0
2	2	0	1	2	1	0	0	0	0	5	1	1	1	0	0	0	0	0	3	0	0	0	0	0	1	1	2	0	0	3	0	0	5	2	0	0	0	2	2	0	0	0	0	1	2	0	2	3	0
3	0	2	1	0	2	0	0	0	0	5	1	1	2	0	1	0	2	1	3	0	1	0	0	0	0	1	0	0	0	0	0	0	4	1	0	0	0	2	3	1	0	1	1	1	2	2	1	2	2
2	2	0	1	0	2	0	0	0	0	4	0	1	0	0	0	0	1	0	1	0	0	1	0	0	1	1	2	0	0	0	0	0	4	1	0	1	0	2	3	0	0	1	1	1	0	0	3	0	0
2	0	0	1	0	2	0	0	0	0	4	0	1	1	0	0	0	2	1	1	0	0	0	0	0	0	0	0	1	0	1	2	0	4	0	0	0	1	2	2	2	0	1	1	1	0	0	1	0	0
1	1	0	1	0	2	0	0	1	1	4	1	1	3	0	0	0	2	1	1	0	0	0	0	0	0	1	0	0	0	1	0	0	3	1	0	0	0	2	2	1	1	0	0	1	1	0	0	1	0
3	0	0	1	0	2	0	0	0	0	4	1	1	3	0	0	0	2	1	1	0	0	0	0	0	0	0	0	1	0	1	0	0	4	1	0	0	1	2	2	1	0	1	0	1	0	0	1	0	0
1	2	1	1	2	3	1	0	0	0	4	0	1	1	0	0	0	2	0	3	0	0	0	0	0	3	1	2	0	0	3	0	0	4	1	0	1	0	0	2	1	0	0	1	1	2	0	3	3	0
1	0	0	1	0	3	1	2	2	0	4	1	1	1	0	0	0	2	0	1	0	0	0	1	0	2	1	2	0	0	3	0	0	2	0	0	3	0	1	2	1	0	0	1	1	2	0	2	2	0
0	0	0	1	0	4	1	0	0	0	3	2	1	1	0	0	2	2	0	1	0	0	0	1	0	2	1	0	0	0	3	0	0	1	0	0	1	0	1	2	1	0	1	1	1	2	0	3	2	0
2	3	0	1	0	3	0	0	3	1	4	0	1	1	0	0	2	2	0	3	0	0	1	0	0	2	1	0	0	0	1	0	0	3	0	0	1	1	2	3	2	1	2	2	1	1	0	3	1	0
1	3	1	1	2	3	1	0	1	1	4	1	1	1	0	0	0	2	0	3	0	0	0	0	0	3	1	2	0	0	3	0	0	3	2	0	1	0	0	2	0	1	0	0	1	3	0	3	3	0
1	0	0	1	0	4	0	0	0	0	3	1	1	3	0	0	0	3	1	1	0	0	1	0	0	2	1	0	0	0	1	0	0	1	1	0	1	0	0	2	0	0	1	0	1	0	0	3	1	1
4	0	0	1	0	3	0	0	0	0	3	1	1	3	0	0	0	3	1	1	0	0	1	0	0	2	1	0	0	0	1	0	0	4	1	0	1	0	0	2	0	0	0	0	1	0	0	2	1	1
3	0	0	1	0	3	1	0	0	0	3	1	1	1	0	0	0	2	0	1	0	0	1	1	0	2	1	0	0	0	3	2	2	4	1	0	1	0	1	3	0	0	0	0	1	2	0	2	2	0
0	0	0	1	0	4	0	0	0	0	2	0	1	0	0	0	0	2	1	1	0	0	2	0	0	2	1	0	0	0	0	0	0	3	1	0	1	0	0	2	0	0	1	1	1	0	0	4	0	1
0	0	0	1	0	4	1	0	0	0	3	1	3	0	0	0	0	2	0	3	0	0	1	1	0	2	1	0	0	0	2	0	0	1	1	0	1	0	1	3	0	2	3	1	1	2	0	4	1	0
0	0	1	1	2	4	0	0	0	0	3	1	1	1	0	0	0	2	0	2	0	0	1	1	0	2	0	0	1	0	3	0	0	1	1	0	3	1	0	2	1	0	1	0	3	0	0	4	1	0
0	2	0	1	2	4	0	0	0	0	4	0	1	0	0	0	0	0	1	3	0	0	0	0	0	1	1	2	0	0	2	0	0	3	1	0	0	0	0	2	1	0	3	2	1	2	0	4	2	0
0	1	0	1	0	3	0	0	1	1	4	1	3	1	0	0	0	0	0	3	0	0	0	1	0	0	1	0	0	0	3	0	0	1	0	0	0	0	0	3	1	3	3	1	1	3	0	3	1	0
2	2	0	1	0	4	0	0	2	0	4	0	1	0	0	0	2	0	0	3	0	0	0	0	0	0	1	0	0	0	0	0	0	3	0	0	0	1	2	3	1	0	4	3	1	0	0	4	0	0
1	0	0	1	0	4	0	0	0	0	4	2	3	1	0	0	0	0	0	3	0	0	0	1	0	0	0	0	1	0	3	0	0	1	1	0	0	1	0	3	0	2	4	0	1	2	0	4	0	0
2	2	0	1	0	2	0	0	0	0	5	0	1	1	0	0	0	1	0	1	0	0	0	0	0	1	1	2	0	0	1	0	0	4	0	0	1	0	2	3	1	0	1	1	1	0	0	3	1	0
0	2	0	1	2	2	0	0	0	0	5	0	1	1	0	0	0	0	0	3	0	0	0	0	0	1	1	2	0	0	3	0	0	4	1	0	0	0	2	2	1	0	1	1	1	2	0	3	3	0
2	0	2	1	0	2	0	0	0	0	5	0	1	3	0	1	0	2	1	3	0	1	0	0	0	0	0	0	1	0	1	0	0	4	0	0	0	1	2	3	2	0	1	1	1	2	2	1	2	2
1	0	0	1	0	3	0	0	0	0	5	3	1	1	0	0	2	1	1	1	0	2	0	0	0	0	1	0	0	0	3	0	0	3	1	0	0	0	2	2	1	0	1	0	3	0	0	3	1	0
1	2	0	1	2	2	0	0	0	0	5	1	1	1	0	0	0	0	0	3	0	0	0	0	0	1	1	2	0	0	3	0	0	4	2	0	0	0	2	2	0	0	1	0	1	2	0	3	3	0
0	0	0	1	0	2	0	0	0	0	4	0	1	0	0	0	0	2	1	1	0	0	0	0	0	0	1	0	0	0	0	0	0	3	0	0	0	2	3	2	3	0	1	2	1	0	0	3	0	0
2	0	0	1	0	2	0	0	0	0	3	0	1	1	0	0	0	2	1	1	0	0	1	0	0	0	0	0	1	0	1	2	0	4	1	0	0	1	2	2	1	0	1	0	1	0	0	1	0	0
2	0	0	1	0	2	0	0	0	0	3	0	1	0	0	0	0	2	1	1	0	0	1	0	0	0	1	0	0	0	0	2	0	4	1	0	0	0	2	2	1	0	1	1	1	0	0	1	0	0
0	0	0	1	0	4	0	0	0	0	4	2	1	0	0	0	2	2	1	1	0	2	1	0	0	2	1	0	0	0	2	0	0	1	0	0	1	0	0	2	1	0	1	2	3	0	0	4	0	1
0	0	0	1	0	4	1	0	0	0	3	2	1	0	0	0	2	2	0	1	0	0	0	1	0	2	1	0	0	0	2	0	0	1	0	0	1	0	1	2	1	0	1	2	1	2	0	3	1	0
0	1	0	1	0	3	1	0	1	1	4	1	3	1	0	0	0	2	0	3	0	0	0	1	0	2	1	0	0	0	3	0	0	1	0	0	1	0	1	3	1	3	2	1	1	3	0	3	2	0
1	0	0	1	0	4	0	0	0	0	4	3	1	1	0	0	2	2	1	1	0	2	1	0	0	2	0	0	1	0	3	0	0	1	1	0	1	1	0	2	0	0	1	0	3	0	0	4	0	1
0	0	0	1	0	4	1	2	2	0	3	1	1	0	0	0	0	2	0	1	0	0	1	1	0	2	1	2	0	0	2	0	0	1	1	0	3	0	1	2	0	0	1	1	1	2	0	3	1	0
2	1	0	1	0	3	0	0	1	1	2	0	1	3	0	0	0	3	1	1	0	0	2	0	0	2	1	0	0	0	1	0	0	3	1	0	1	0	0	2	0	1	0	0	1	1	0	2	1	1
2	0	0	1	0	4	0	0	0	0	2	0	1	3	0	0	0	3	1	1	0	0	2	0	0	2	0	0	1	0	1	0	0	3	1	0	1	1	0	2	0	0	1	0	1	0	0	3	0	1
0	0	0	1	0	4	1	0	0	0	2	2	1	1	0	0	2	2	0	1	0	0	1	1	0	2	0	0	1	0	3	0	0	1	1	0	1	1	1	2	0	0	1	0	1	2	0	3	1	0
1	0	0	1	0	3	0	0	0	0	4	2	1	1	0	0	2	0	1	2	0	2	0	0	0	0	1	0	0	0	3	0	0	2	0	0	0	0	0	2	1	0	2	1	3	0	0	3	1	0
3	2	0	1	0	4	0	0	0	0	4	1	1	0	0	0	0	1	0	1	0	0	0	0	0	1	1	2	0	0	0	0	0	3	1	0	0	0	0	3	0	0	3	1	1	0	0	4	0	0
1	0	1	1	0	4	0	1	0	0	4	1	1	1	0	0	0	2	0	1	0	0	0	0	0	0	0	0	2	0	1	0	0	1	1	0	0	3	2	2	0	0	3	0	1	0	0	4	0	0
3	0	2	1	0	4	0	0	0	0	4	1	1	2	0	1	0	1	1	3	0	1	0	0	0	0	1	0	0	0	0	0	0	3	1	0	0	0	0	3	0	0	3	1	1	2	2	3	2	2
0	2	0	1	2	4	0	0	0	0	3	0	1	1	0	0	0	0	1	3	0	0	1	0	0	1	1	2	0	0	3	0	0	3	2	0	0	0	0	2	0	0	3	0	1	2	0	4	3	0
1	0	2	1	2	3	0	0	0	0	3	1	1	1	0	0	0	0	0	1	0	0	0	1	0	0	1	0	0	0	3	0	0	2	0	0	0	0	0	2	1	0	2	1	1	2	0	2	1	0
2	2	0	1	0	4	0	0	2	0	4	0	1	1	0	0	2	0	0	3	0	0	0	0	0	0	0	0	1	0	1	0	0	3	0	0	0	2	2	3	1	0	4	2	1	0	0	4	0	0
1	0	2	1	2	4	0	0	0	0	3	2	1	1	0	0	0	0	0	1	0	0	0	1	0	0	1	0	0	0	3	0	0	1	1	0	0	0	0	2	0	0	3	0	1	2	0	3	1	0
3	2	0	1	0	4	0	0	2	0	4	1	1	1	0	0	2	0	0	3	0	0	0	0	0	0	0	0	1	0	1	0	0	3	1	0	0	2	2	3	0	0	4	1	1	0	0	4	0	0
1	1	0	1	2	3	0	0	1	1	3	2	1	1	0	0	0	0	0	1	0	0	0	1	0	0	1	0	0	0	3	0	0	1	1	0	0	0	0	3	0	1	2	0	1	3	0	2	1	0
3	2	0	1	1	4	0	0	0	0	3	1	1	2	0	0	0	0	1	1	0	0	0	1	0	1	1	2	0	0	0	0	0	3	1	0	0	0	0	2	0	0	3	1	1	0	0	3	0	0
1	0	2	1	2	3	0	0	0	0	2	1	1	1	0	0	0	0	0	1	0	0	1	1	0	0	1	0	0	0	3	0	0	2	1	0	0	0	0	2	0	0	2	0	1	2	0	2	1	0
0	0	1	1	0	2	0	1	0	0	3	0	1	1	0	0	0	2	0	1	0	0	1	0	0	0	1	0	1	0	1	0	0	3	1	0	0	2	3	2	0	0	1	0	1	0	0	3	1	0
2	0	2	1	0	2	0	0	0	0	4	0	1	3	0	1	0	2	1	3	0	1	1	0	0	0	0	0	1	0	1	0	0	4	1	0	0	1	2	3	1	0	1	0	1	2	2	1	2	2
1	0	0	1	0	3	0	0	0	0	4	1	1	3	0	0	0	2	1	1	0	0	0	0	0	0	0	0	1	0	1	0	0	3	1	0	0	1	2	2	1	0	1	0	1	0	0	1	0	0
1	1	0	1	0	2	0	0	1	1	4	1	1	1	0	0	0	1	1	1	0	0	0	0	0	0	1	0	0	0	1	0	0	4	1	0	0	0	2	2	1	1	0	0	1	1	0	2	1	0
2	0	0	1	0	1	0	0	0	0	4	1	1	1	0	0	0	2	1	1	0	0	0	0	0	0	1	0	0	0	1	0	0	4	1	0	0	2	3	2	2	0	0	0	1	0	0	2	1	0
2	1	0	1	0	1	0	0	1	1	3	0	1	3	0	0	0	2	1	1	0	0	1	0	0	0	1	0	0	0	1	0	0	4	1	0	0	0	2	2	1	1	0	0	1	1	0	0	1	0
2	1	0	1	0	3	0	0	1	1	3	0	1	3	0	0	0	3	1	1	0	0	1	0	0	2	1	0	0	0	1	0	0	3	0	0	1	0	0	2	1	1	0	1	1	1	0	2	1	1
0	0	0	1	2	4	1	0	0	0	3	1	1	1	0	0	0	2	0	1	0	0	0	1	0	2	0	0	1	0	3	0	0	1	0	0	1	1	1	3	1	0	1	1	1	2	0	3	1	0
1	0	0	1	0	4	0	0	0	0	3	1	1	1	0	0	0	2	1	1	0	0	1	0	0	2	0	0	1	0	1	0	0	3	1	0	1	1	0	2	0	0	1	0	1	0	0	4	0	1
2	0	0	1	0	4	0	0	0	0	4	1	1	1	0	0	0	0	0	1	0	0	0	1	0	0	1	0	0	0	3	2	2	3	0	0	0	0	0	3	1	0	3	1	1	2	0	3	1	0
1	2	0	1	2	4	0	0	0	0	4	1	1	1	0	0	0	0	1	3	0	0	0	0	0	1	1	2	0	0	3	0	0	3	2	0	0	0	0	2	0	0	3	0	1	2	0	4	3	0
3	1	2	1	0	3	0	0	1	1	4	1	1	3	0	1	0	1	1	3	0	1	0	0	0	0	1	0	0	0	1	0	0	3	1	0	0	0	0	3	0	1	2	0	1	3	2	2	3	2
0	0	0	1	0	3	0	0	0	0	5	2	1	1	0	0	2	1	1	1	0	2	0	0	0	0	1	0	0	0	3	0	0	3	0	0	0	0	2	2	2	0	1	1	3	0	0	3	1	0
2	0	2	1	0	2	0	0	0	0	4	0	1	3	0	1	0	2	1	3	0	1	1	0	0	0	1	0	0	0	1	0	0	4	1	0	0	0	2	3	1	0	1	0	1	2	2	1	3	2
0	0	0	1	0	3	0	0	0	0	4	0	1	2	0	0	0	2	1	1	0	0	0	0	0	0	1	0	0	0	0	0	0	3	0	0	0	0	2	2	2	0	1	2	1	0	0	1	0	0
3	0	0	1	0	2	0	0	0	0	4	1	1	2	0	0	0	2	1	1	0	0	0	0	0	0	1	0	0	0	0	0	0	4	1	0	0	0	2	2	1	0	1	1	1	0	0	1	0	0
0	0	0	1	0	3	0	0	0	0	3	0	1	0	0	0	0	1	1	1	0	0	1	0	0	0	1	0	0	0	0	0	0	4	1	0	0	0	2	2	1	0	1	1	1	0	0	3	0	0
0	0	0	1	0	4	0	0	0	0	3	0	1	1	0	0	0	2	1	1	0	0	1	0	0	2	0	0	1	0	1	0	0	3	0	0	1	1	0	2	1	0	1	1	1	0	0	4	0	1
0	1	0	1	2	3	1	0	1	1	3	1	1	1	0	0	0	2	0	1	0	0	0	1	0	2	1	0	0	0	3	0	0	1	0	0	1	0	1	3	1	1	0	1	1	3	0	2	2	0
2	2	1	1	1	4	1	0	0	0	3	0	1	2	0	0	0	2	0	1	0	0	0	1	0	3	1	2	0	0	0	0	0	3	0	0	1	0	0	2	1	0	1	2	1	0	0	3	0	0
1	1	1	1	0	3	0	1	1	1	3	1	1	1	0	0	0	3	0	1	0	0	1	0	0	2	1	0	1	0	1	0	0	1	1	0	1	2	2	2	0	1	0	0	1	1	0	3	1	0
4	2	1	1	1	3	1	0	0	0	3	1	1	3	0	0	0	2	0	1	0	0	0	1	0	3	1	2	0	0	1	0	0	4	1	0	1	0	0	2	0	0	0	0	1	0	0	2	1	0
0	0	1	1	0	4	0	1	0	0	4	0	1	0	0	0	0	2	0	1	0	0	0	0	0	0	1	0	1	0	0	0	0	1	0	0	0	2	2	2	1	0	3	2	1	0	0	4	0	0
3	0	2	1	0	3	0	0	0	0	4	0	1	3	0	1	0	1	1	3	0	1	0	0	0	0	1	0	0	0	1	0	0	4	0	0	0	0	0	3	1	0	2	1	1	2	2	2	3	2
0	1	0	1	0	3	0	0	1	1	3	2	1	1	0	0	2	0	1	2	0	2	1	0	0	0	1	0	0	0	3	0	0	1	1	0	0	0	0	2	0	1	2	0	3	1	0	3	1	0
0	0	0	1	0	4	0	0	0	0	3	2	1	1	0	0	2	0	1	2	0	2	1	0	0	0	0	0	1	0	3	0	0	1	1	0	0	1	0	2	0	0	3	0	3	0	0	4	0	0
2	2	0	1	0	4	0	0	2	0	3	0	1	0	0	0	2	0	0	3	0	0	1	0	0	0	1	0	0	0	0	0	0	3	1	0	0	1	2	3	0	0	4	2	1	0	0	4	0	0
2	0	0	1	0	2	0	0	0	0	5	1	1	1	0	0	0	0	0	1	0	0	0	1	0	0	1	0	0	0	3	2	2	4	0	0	0	0	2	3	1	0	1	1	1	2	0	1	1	0
0	0	0	1	0	3	0	0	0	0	5	2	1	1	0	0	2	1	1	1	0	2	0	0	0	0	0	0	1	0	3	0	0	3	0	0	0	1	2	2	2	0	1	1	3	0	0	3	0	0
0	0	0	1	0	3	0	0	0	0	5	2	1	0	0	0	2	1	1	1	0	2	0	0	0	0	1	0	0	0	2	0	0	3	0	0	0	0	2	2	2	0	1	2	3	0	0	3	0	0
3	0	0	1	0	2	0	0	0	0	5	2	1	1	0	0	0	0	0	1	0	0	0	1	0	0	0	0	1	0	3	2	2	4	1	0	0	1	2	3	0	0	1	0	1	2	0	1	0	0
3	0	0	1	0	2	0	0	0	0	5	2	1	0	0	0	0	0	0	1	0	0	0	1	0	0	1	0	0	0	2	2	2	4	1	0	0	0	2	3	0	0	1	1	1	2	0	1	0	0
0	2	0	1	2	2	0	0	0	0	4	0	1	0	0	0	0	0	0	3	0	0	1	0	0	1	1	2	0	0	2	0	0	4	2	0	0	0	2	2	0	0	1	1	1	2	0	3	2	0
0	1	0	1	0	2	0	0	1	1	4	0	1	1	0	0	0	1	1	1	0	0	0	0	0	0	1	0	0	0	1	0	0	4	0	0	0	0	2	2	2	1	0	1	1	1	0	2	1	0
1	0	0	1	0	3	0	0	0	0	4	1	1	3	0	0	0	2	1	1	0	0	0	0	0	0	1	0	0	0	1	0	0	3	1	0	0	0	2	2	1	0	1	0	1	0	0	1	1	0
2	0	0	1	0	2	0	0	0	0	4	1	1	3	0	0	0	2	1	1	0	0	0	0	0	0	1	0	0	0	1	0	0	4	1	0	0	0	2	2	1	0	0	0	1	0	0	0	1	0
3	0	0	1	0	1	0	0	0	0	3	0	1	1	0	0	0	2	1	1	0	0	1	0	0	0	1	0	0	0	1	2	0	5	1	0	0	0	2	2	1	0	0	0	1	0	0	0	1	0
0	1	1	1	0	3	0	1	1	1	3	0	1	1	0	0	0	3	0	1	0	0	1	0	0	2	1	0	1	0	1	0	0	1	0	0	1	2	2	2	1	1	0	1	1	1	0	3	1	0
0	0	0	1	0	4	0	0	0	0	4	2	1	1	0	0	2	2	1	1	0	2	1	0	0	2	1	0	0	0	3	0	0	1	0	0	1	0	0	2	1	0	1	1	3	0	0	4	1	1
0	1	1	1	2	3	0	0	1	1	4	1	1	1	0	0	0	2	0	2	0	0	0	1	0	2	1	0	0	0	3	0	0	1	0	0	3	0	0	2	2	1	0	1	3	1	0	3	2	0
3	0	0	1	0	4	0	0	0	0	3	1	1	2	0	0	0	3	1	1	0	0	1	0	0	2	1	0	0	0	0	0	0	3	1	0	1	0	0	2	0	0	1	1	1	0	0	3	0	1
1	1	0	1	0	3	1	0	1	1	3	3	1	1	0	0	2	2	0	1	0	0	0	1	0	2	1	0	0	0	3	0	0	1	1	0	1	0	1	2	0	1	0	0	1	3	0	2	2	0
2	0	0	1	2	3	1	0	0	0	3	2	1	1	0	0	0	2	0	1	0	0	0	1	0	2	1	0	0	0	3	0	0	2	1	0	1	0	1	3	0	0	0	0	1	2	0	2	2	0
1	0	0	1	2	4	1	0	0	0	3	2	1	0	0	0	0	2	0	1	0	0	0	1	0	2	1	0	0	0	2	0	0	1	1	0	1	0	1	3	0	0	1	1	1	2	0	3	1	0
1	0	1	1	0	3	0	1	0	0	2	0	1	1	0	0	0	3	0	1	0	0	2	0	0	2	1	0	1	0	1	0	0	2	1	0	1	2	2	2	0	0	0	0	1	0	0	3	1	0
2	2	0	1	0	4	0	0	2	0	3	0	1	1	0	0	2	2	0	3	0	0	2	0	0	2	1	0	0	0	1	0	0	3	1	0	1	1	2	3	1	0	3	1	1	0	0	4	1	0
0	1	1	1	0	3	0	1	1	1	4	0	1	1	0	0	0	2	0	1	0	0	0	0	0	0	1	0	1	0	1	0	0	1	0	0	0	2	2	2	1	1	2	1	1	1	0	3	1	0
2	0	2	1	0	4	0	0	0	0	3	0	1	2	0	1	0	1	1	3	0	1	1	0	0	0	1	0	0	0	0	0	0	3	1	0	0	0	0	3	0	0	3	1	1	2	2	3	2	2
0	0	0	1	2	4	0	0	0	0	2	1	1	1	0	0	0	0	0	1	0	0	1	1	0	0	0	0	1	0	3	0	0	1	1	0	0	1	0	3	0	0	3	0	1	2	0	3	0	0
3	2	0	1	0	1	0	0	0	0	5	0	1	1	0	0	0	1	0	1	0	0	0	0	0	1	1	2	0	0	1	0	0	5	0	0	1	0	2	3	1	0	0	1	1	0	0	2	1	0
0	0	1	1	0	2	0	1	0	0	4	0	1	1	0	0	0	2	0	1	0	0	0	0	0	0	1	0	1	0	1	0	0	3	0	0	0	2	3	2	1	0	1	1	1	0	0	3	1	0
0	2	0	1	2	2	0	0	0	0	5	0	1	0	0	0	0	0	0	3	0	0	0	0	0	1	1	2	0	0	2	0	0	4	1	0	0	0	2	2	1	0	1	2	1	2	0	3	2	0
3	1	2	1	0	1	0	0	1	1	5	1	1	3	0	1	0	2	1	3	0	1	0	0	0	0	1	0	0	0	1	0	0	4	1	0	0	0	2	3	1	1	0	0	1	3	2	0	3	2
1	0	0	1	0	2	0	0	0	0	4	0	1	3	0	0	0	2	1	1	0	0	0	0	0	0	1	0	0	0	1	0	0	4	0	0	0	0	2	2	2	0	0	1	1	0	0	0	1	0
3	0	0	1	0	2	0	0	0	0	4	1	1	3	0	0	0	2	1	1	0	0	0	0	0	0	1	0	0	0	1	0	0	4	1	0	0	0	2	2	1	0	1	0	1	0	0	1	1	0
0	0	0	1	0	3	0	0	0	0	3	0	1	1	0	0	0	1	1	1	0	0	1	0	0	0	0	0	1	0	1	0	0	4	1	0	0	1	2	2	1	0	1	0	1	0	0	3	0	0
0	1	0	1	0	3	0	0	1	1	3	0	1	3	0	0	0	3	1	1	0	0	1	0	0	2	1	0	0	0	1	0	0	1	0	0	1	0	0	2	1	1	0	1	1	1	0	2	1	1
2	0	0	1	0	4	0	0	0	0	3	0	1	2	0	0	0	3	1	1	0	0	1	0	0	2	1	0	0	0	0	0	0	3	0	0	1	0	0	2	1	0	1	2	1	0	0	3	0	1
0	0	0	1	0	4	1	0	0	0	4	1	3	0	0	0	0	2	0	3	0	0	0	1	0	2	1	0	0	0	2	0	0	1	0	0	1	0	1	3	1	2	3	2	1	2	0	4	1	0
2	2	0	1	0	4	0	0	2	0	4	0	1	1	0	0	2	2	0	3	0	0	1	0	0	2	1	0	0	0	1	0	0	3	0	0	1	1	2	3	2	0	3	2	1	0	0	4	1	0
3	0	0	1	0	4	1	0	0	0	4	2	1	1	0	0	0	2	0	1	0	0	0	1	0	2	1	0	0	0	3	2	2	3	1	0	1	0	1	3	0	0	1	0	1	2	0	3	2	0
1	0	1	1	0	4	0	1	0	0	3	1	1	0	0	0	0	2	0	1	0	2	1	0	0	2	1	0	1	0	0	0	0	1	1	0	1	0	0	2	0	0	3	1	1	0	0	4	0	0
1	0	0	1	0	4	0	0	0	0	3	1	1	2	0	0	0	3	1	1	0	0	1	0	0	2	1	0	0	0	0	0	0	1	1	0	1	0	0	2	0	0	1	1	1	0	0	3	0	1
1	1	0	1	0	3	1	0	1	1	4	2	3	1	0	0	0	2	0	3	0	0	0	1	0	2	1	0	0	0	3	0	0	1	1	0	1	0	1	3	0	3	2	0	1	3	0	3	2	0
1	0	1	1	2	4	0	0	0	0	4	2	1	1	0	0	0	2	0	2	0	0	0	1	0	2	0	0	1	0	3	0	0	1	1	0	3	1	0	2	1	0	1	0	3	0	0	4	1	0
0	0	0	1	0	4	0	0	0	0	3	2	1	1	0	0	2	2	1	1	0	2	2	0	0	2	1	0	0	0	3	0	0	1	1	0	1	0	0	2	0	0	1	0	3	0	0	4	1	1
2	0	0	1	0	4	0	0	0	0	2	0	1	1	0	0	0	3	1	1	0	0	2	0	0	2	1	0	0	0	1	2	0	3	1	0	1	0	0	2	0	0	1	0	1	0	0	3	1	1
0	1	0	1	0	3	1	0	1	1	2	2	1	1	0	0	2	2	0	1	0	0	1	1	0	2	1	0	0	0	3	0	0	1	1	0	1	0	1	2	0	1	0	0	1	3	0	2	2	0
1	0	0	1	0	3	1	0	0	0	3	1	3	1	0	0	0	2	0	3	0	0	1	1	0	2	1	0	0	0	3	0	0	2	1	0	1	0	1	3	0	2	2	0	1	2	0	3	2	0
0	0	0	1	2	4	1	0	0	0	2	1	1	0	0	0	0	2	0	1	0	0	1	1	0	2	1	0	0	0	2	0	0	1	1	0	1	0	1	3	0	0	1	1	1	2	0	3	1	0
0	2	0	1	2	4	0	0	0	0	4	0	1	1	0	0	0	0	1	3	0	0	0	0	0	1	0	2	1	0	3	0	0	3	1	0	0	1	0	2	1	0	3	1	1	2	0	4	2	0
4	2	0	1	0	3	0	0	0	0	4	1	1	1	0	0	0	1	0	1	0	0	0	0	0	1	1	2	0	0	1	0	0	4	1	0	0	0	0	3	0	0	2	0	1	0	0	3	1	0
2	0	0	1	0	4	0	0	0	0	3	1	1	0	0	0	0	0	0	1	0	0	1	1	0	0	1	0	0	0	2	2	2	3	1	0	0	0	0	3	0	0	3	1	1	2	0	3	0	0
2	2	0	1	1	4	0	0	0	0	3	0	1	3	0	0	0	0	1	1	0	0	0	1	0	1	1	2	0	0	1	0	0	3	0	0	0	0	0	2	1	0	3	1	1	0	0	3	1	0
2	0	0	1	0	3	0	0	0	0	4	2	3	1	0	0	0	0	0	3	0	0	0	1	0	0	1	0	0	0	3	0	0	2	1	0	0	0	0	3	0	2	3	0	1	2	0	3	1	0
1	0	0	1	2	4	0	0	0	0	3	2	1	0	0	0	0	0	0	1	0	0	0	1	0	0	1	0	0	0	2	0	0	1	1	0	0	0	0	3	0	0	3	1	1	2	0	3	0	0
1	2	0	1	2	2	0	0	0	0	5	1	1	1	0	0	0	0	0	3	0	0	0	0	0	1	0	2	1	0	3	0	0	4	2	0	0	1	2	2	0	0	1	0	1	2	0	3	2	0
3	2	0	1	0	1	0	0	0	0	4	0	1	1	0	0	0	1	0	1	0	0	1	0	0	1	1	2	0	0	1	0	0	5	1	0	1	0	2	3	0	0	0	0	1	0	0	2	1	0
2	0	0	1	0	2	0	0	0	0	4	0	1	0	0	0	0	2	1	1	0	0	0	0	0	0	1	0	0	0	0	2	0	4	0	0	0	0	2	2	2	0	1	2	1	0	0	1	0	0
1	0	0	1	0	2	0	0	0	0	4	1	1	1	0	0	0	2	1	1	0	0	0	0	0	0	1	0	0	0	1	0	0	3	1	0	0	2	3	2	2	0	1	0	1	0	0	3	1	0
2	2	1	1	1	4	1	0	0	0	3	0	1	3	0	0	0	2	0	1	0	0	0	1	0	3	1	2	0	0	1	0	0	3	0	0	1	0	0	2	1	0	1	1	1	0	0	3	1	0
4	0	2	1	0	3	0	0	0	0	4	1	1	3	0	1	0	3	1	3	0	0	1	0	0	2	1	0	0	0	1	0	0	4	1	0	1	0	0	3	0	0	0	0	1	2	2	2	3	2
1	1	0	1	0	3	0	0	1	1	3	1	1	3	0	0	0	3	1	1	0	0	1	0	0	2	1	0	0	0	1	0	0	1	1	0	1	0	0	2	0	1	0	0	1	1	0	2	1	1
3	0	0	1	0	4	0	0	0	0	3	1	1	3	0	0	0	3	1	1	0	0	1	0	0	2	1	0	0	0	1	0	0	3	1	0	1	0	0	2	0	0	1	0	1	0	0	3	1	1
1	0	0	1	0	4	1	0	0	0	4	2	3	1	0	0	0	2	0	3	0	0	0	1	0	2	0	0	1	0	3	0	0	1	1	0	1	1	1	3	0	2	3	0	1	2	0	4	1	0
0	1	1	1	0	3	0	1	1	1	2	0	1	1	0	0	0	2	0	1	0	2	2	0	0	2	1	0	1	0	1	0	0	1	1	0	1	0	0	2	0	1	2	0	1	1	0	3	1	0
0	0	0	1	0	4	0	0	0	0	2	0	1	3	0	0	0	3	1	1	0	0	2	0	0	2	1	0	0	0	1	0	0	1	1	0	1	0	0	2	0	0	1	0	1	0	0	3	1	1
3	2	1	1	1	3	1	0	0	0	2	0	1	3	0	0	0	2	0	1	0	0	1	1	0	3	1	2	0	0	1	0	0	4	1	0	1	0	0	2	0	0	0	0	1	0	0	2	1	0
0	0	1	1	0	4	0	1	0	0	4	0	1	1	0	0	0	2	0	1	0	0	0	0	0	0	0	0	2	0	1	0	0	1	0	0	0	3	2	2	1	0	3	1	1	0	0	4	0	0
2	0	0	1	0	4	0	0	0	0	4	1	1	0	0	0	0	0	0	1	0	0	0	1	0	0	1	0	0	0	2	2	2	3	0	0	0	0	0	3	1	0	3	2	1	2	0	3	0	0
3	0	0	1	0	4	0	0	0	0	4	2	1	0	0	0	0	0	0	1	0	0	0	1	0	0	1	0	0	0	2	2	2	3	1	0	0	0	0	3	0	0	3	1	1	2	0	3	0	0
2	2	0	1	0	4	0	0	0	0	3	0	1	1	0	0	0	1	0	1	0	0	1	0	0	1	0	2	1	0	1	0	0	3	1	0	0	1	0	3	0	0	3	0	1	0	0	4	0	0
3	3	0	1	0	3	0	0	3	1	4	1	1	1	0	0	2	0	0	3	0	0	0	0	0	0	1	0	0	0	1	0	0	3	1	0	0	1	2	3	0	1	3	1	1	1	0	3	1	0
4	2	0	1	1	3	0	0	0	0	3	1	1	3	0	0	0	0	1	1	0	0	0	1	0	1	1	2	0	0	1	0	0	4	1	0	0	0	0	2	0	0	2	0	1	0	0	2	1	0
0	0	0	1	2	4	0	0	0	0	2	1	1	0	0	0	0	0	0	1	0	0	1	1	0	0	1	0	0	0	2	0	0	1	1	0	0	0	0	3	0	0	3	1	1	2	0	3	0	0
1	0	0	1	0	3	0	0	0	0	5	3	1	0	0	0	2	1	1	1	0	2	0	0	0	0	1	0	0	0	2	0	0	3	1	0	0	0	2	2	1	0	1	1	3	0	0	3	0	0
2	0	0	1	0	2	0	0	0	0	4	1	1	1	0	0	0	0	0	1	0	0	1	1	0	0	1	0	0	0	3	2	2	4	1	0	0	0	2	3	0	0	1	0	1	2	0	1	1	0
2	1	0	1	0	1	0	0	1	1	4	1	1	1	0	0	0	0	0	1	0	0	1	1	0	0	1	0	0	0	3	2	2	4	1	0	0	0	2	3	0	1	0	0	1	3	0	0	1	0
0	0	0	1	0	3	0	0	0	0	4	0	1	1	0	0	0	1	1	1	0	0	0	0	0	0	1	0	0	0	1	0	0	4	0	0	0	0	2	2	2	0	1	1	1	0	0	3	1	0
0	0	0	1	0	3	0	0	0	0	4	0	1	0	0	0	0	1	1	1	0	0	0	0	0	0	1	0	0	0	0	0	0	4	0	0	0	0	2	2	2	0	1	2	1	0	0	3	0	0
0	0	0	1	0	3	0	0	0	0	3	0	1	2	0	0	0	2	1	1	0	0	1	0	0	0	1	0	0	0	0	0	0	3	1	0	0	0	2	2	1	0	1	1	1	0	0	1	0	0
2	0	0	1	0	2	0	0	0	0	3	0	1	3	0	0	0	2	1	1	0	0	1	0	0	0	1	0	0	0	1	0	0	4	1	0	0	0	2	2	1	0	1	0	1	0	0	1	1	0
0	0	0	1	0	4	0	0	0	0	3	0	1	3	0	0	0	3	1	1	0	0	1	0	0	2	1	0	0	0	1	0	0	1	0	0	1	0	0	2	1	0	1	1	1	0	0	3	1	1
2	0	0	1	0	4	0	0	0	0	3	0	1	3	0	0	0	3	1	1	0	0	1	0	0	2	0	0	1	0	1	0	0	3	0	0	1	1	0	2	1	0	1	1	1	0	0	3	0	1
3	0	0	1	0	4	1	0	0	0	4	2	1	1	0	0	0	2	0	1	0	0	0	1	0	2	0	0	1	0	3	2	2	3	1	0	1	1	1	3	0	0	1	0	1	2	0	3	1	0
1	0	0	1	0	4	1	2	2	0	4	2	1	1	0	0	0	2	0	1	0	0	0	1	0	2	0	2	1	0	3	0	0	1	1	0	3	1	1	2	0	0	1	0	1	2	0	3	1	0
2	0	0	1	0	3	0	0	0	0	3	1	1	3	0	0	0	3	1	1	0	0	1	0	0	2	1	0	0	0	1	0	0	2	1	0	1	0	0	2	0	0	0	0	1	0	0	2	1	1
3	2	1	1	1	4	1	0	0	0	3	1	1	3	0	0	0	2	0	1	0	0	0	1	0	3	0	2	1	0	1	0	0	3	1	0	1	1	0	2	0	0	1	0	1	0	0	3	0	0
2	0	2	1	0	4	0	0	0	0	3	0	1	2	0	1	0	3	1	3	0	0	2	0	0	2	1	0	0	0	0	0	0	3	1	0	1	0	0	3	0	0	1	1	1	2	2	3	2	2
2	2	1	1	1	4	1	0	0	0	2	0	1	3	0	0	0	2	0	1	0	0	1	1	0	3	1	2	0	0	1	0	0	3	1	0	1	0	0	2	0	0	1	0	1	0	0	3	1	0
2	2	1	1	1	4	1	0	0	0	2	0	1	3	0	0	0	2	0	1	0	0	1	1	0	3	0	2	1	0	1	0	0	3	1	0	1	1	0	2	0	0	1	0	1	0	0	3	0	0
3	2	0	1	0	3	0	0	0	0	3	0	1	1	0	0	0	1	0	1	0	0	1	0	0	1	1	2	0	0	1	0	0	4	1	0	0	0	0	3	0	0	2	0	1	0	0	3	1	0
0	0	0	1	2	4	0	0	0	0	3	1	1	1	0	0	0	0	0	1	0	0	0	1	0	0	1	0	0	0	3	0	0	1	0	0	0	0	0	3	1	0	3	1	1	2	0	3	1	0
2	2	0	1	0	4	0	0	2	0	3	0	1	1	0	0	2	0	0	3	0	0	1	0	0	0	1	0	0	0	1	0	0	3	1	0	0	1	2	3	0	0	4	1	1	0	0	4	1	0
4	0	2	1	0	1	0	0	0	0	5	1	1	3	0	1	0	2	1	3	0	1	0	0	0	0	1	0	0	0	1	0	0	5	1	0	0	0	2	3	1	0	0	0	1	2	2	0	3	2
1	0	0	1	0	2	0	0	0	0	4	2	1	1	0	0	2	1	1	1	0	2	1	0	0	0	1	0	0	0	3	0	0	4	1	0	0	0	2	2	1	0	0	0	3	0	0	2	1	0
2	0	0	1	0	2	0	0	0	0	4	0	1	2	0	0	0	2	1	1	0	0	0	0	0	0	1	0	0	0	0	0	0	4	0	0	0	0	2	2	2	0	1	2	1	0	0	1	0	0
2	0	0	1	0	2	0	0	0	0	4	1	1	1	0	0	0	1	1	1	0	0	0	0	0	0	1	0	0	0	1	0	0	5	1	0	0	0	2	2	1	0	0	0	1	0	0	2	1	0
1	1	0	1	0	1	0	0	1	1	4	1	1	1	0	0	0	2	1	1	0	0	0	0	0	0	1	0	0	0	1	0	0	3	1	0	0	2	3	2	2	1	0	0	1	1	0	2	1	0
1	0	0	1	0	2	0	0	0	0	4	1	1	0	0	0	0	2	1	1	0	0	0	0	0	0	1	0	0	0	0	0	0	3	1	0	0	2	3	2	2	0	1	1	1	0	0	3	0	0
0	0	0	1	0	3	0	0	0	0	3	0	1	3	0	0	0	2	1	1	0	0	1	0	0	0	1	0	0	0	1	0	0	3	1	0	0	0	2	2	1	0	1	0	1	0	0	1	1	0
0	1	0	1	0	1	0	0	1	1	3	0	1	1	0	0	0	2	1	1	0	0	1	0	0	0	1	0	0	0	1	0	0	3	1	0	0	2	3	2	2	1	0	0	1	1	0	2	1	0
0	0	0	1	0	2	0	0	0	0	3	0	1	0	0	0	0	2	1	1	0	0	1	0	0	0	1	0	0	0	0	0	0	3	1	0	0	2	3	2	2	0	1	1	1	0	0	3	0	0
2	1	2	1	0	3	0	0	1	1	4	0	1	3	0	1	0	3	1	3	0	0	1	0	0	2	1	0	0	0	1	0	0	3	0	0	1	0	0	3	1	1	0	1	1	3	2	2	3	2
2	0	0	1	0	4	0	0	0	0	3	0	1	3	0	0	0	3	1	1	0	0	1	0	0	2	1	0	0	0	1	0	0	3	0	0	1	0	0	2	1	0	1	1	1	0	0	3	1	1
0	1	0	1	0	3	0	0	1	1	3	0	1	1	0	0	0	2	1	1	0	0	1	0	0	2	1	0	0	0	1	0	0	3	0	0	1	0	0	2	1	1	0	1	1	1	0	3	1	1
1	0	1	1	0	4	0	1	0	0	3	1	1	1	0	0	0	3	0	1	0	0	1	0	0	2	0	0	2	0	1	0	0	1	1	0	1	3	2	2	0	0	1	0	1	0	0	4	0	0
3	2	0	1	0	4	0	0	2	0	4	1	1	1	0	0	2	2	0	3	0	0	1	0	0	2	1	0	0	0	1	0	0	3	1	0	1	1	2	3	1	0	3	1	1	0	0	4	1	0
0	1	0	1	0	3	1	2	3	1	3	1	1	1	0	0	0	2	0	1	0	0	1	1	0	2	1	2	0	0	3	0	0	1	1	0	3	0	1	2	0	1	0	0	1	3	0	2	2	0
0	2	1	1	2	4	1	0	0	0	3	0	1	0	0	0	0	2	0	3	0	0	1	0	0	3	1	2	0	0	2	0	0	3	2	0	1	0	0	2	0	0	1	1	1	2	0	4	2	0
2	2	0	1	0	4	0	0	0	0	4	0	1	1	0	0	0	1	0	1	0	0	0	0	0	1	0	2	1	0	1	0	0	3	0	0	0	1	0	3	1	0	3	1	1	0	0	4	0	0
2	0	2	1	0	4	0	0	0	0	4	0	1	2	0	1	0	1	1	3	0	1	0	0	0	0	1	0	0	0	0	0	0	3	0	0	0	0	0	3	1	0	3	2	1	2	2	3	2	2
3	0	2	1	0	4	0	0	0	0	4	1	1	3	0	1	0	1	1	3	0	1	0	0	0	0	1	0	0	0	1	0	0	3	1	0	0	0	0	3	0	0	3	0	1	2	2	3	3	2
3	0	0	1	0	3	0	0	0	0	3	1	1	1	0	0	0	0	0	1	0	0	1	1	0	0	1	0	0	0	3	2	2	4	1	0	0	0	0	3	0	0	2	0	1	2	0	2	1	0
2	3	0	1	0	3	0	0	3	1	4	0	1	1	0	0	2	0	0	3	0	0	0	0	0	0	1	0	0	0	1	0	0	3	0	0	0	1	2	3	1	1	3	2	1	1	0	3	1	0
0	0	0	1	0	4	0	0	0	0	3	1	3	1	0	0	0	0	0	3	0	0	1	1	0	0	0	0	1	0	3	0	0	1	1	0	0	1	0	3	0	2	4	0	1	2	0	4	0	0
0	0	0	1	0	4	0	0	0	0	3	1	3	0	0	0	0	0	0	3	0	0	1	1	0	0	1	0	0	0	2	0	0	1	1	0	0	0	0	3	0	2	4	1	1	2	0	4	0	0
3	2	0	1	1	3	0	0	0	0	2	0	1	3	0	0	0	0	1	1	0	0	1	1	0	1	1	2	0	0	1	0	0	4	1	0	0	0	0	2	0	0	2	0	1	0	0	2	1	0
3	2	0	1	0	2	0	0	0	0	5	1	1	1	0	0	0	1	0	1	0	0	0	0	0	1	0	2	1	0	1	0	0	4	1	0	1	1	2	3	0	0	1	0	1	0	0	3	0	0
2	0	0	1	0	2	0	0	0	0	5	3	1	1	0	0	2	1	1	1	0	2	0	0	0	0	1	0	0	0	3	0	0	4	1	0	0	0	2	2	1	0	0	0	3	0	0	2	1	0
0	1	0	1	0	2	0	0	1	1	4	2	1	1	0	0	2	1	1	1	0	2	1	0	0	0	1	0	0	0	3	0	0	3	1	0	0	0	2	2	1	1	0	0	3	1	0	2	1	0
0	0	0	1	0	3	0	0	0	0	4	0	1	3	0	0	0	2	1	1	0	0	0	0	0	0	0	0	1	0	1	0	0	3	0	0	0	1	2	2	2	0	1	1	1	0	0	1	0	0
1	0	0	1	0	2	0	0	0	0	4	1	1	1	0	0	0	2	1	1	0	0	0	0	0	0	0	0	1	0	1	0	0	3	1	0	0	3	3	2	2	0	1	0	1	0	0	3	0	0
0	0	0	1	0	2	0	0	0	0	3	0	1	1	0	0	0	2	1	1	0	0	1	0	0	0	0	0	1	0	1	0	0	3	1	0	0	3	3	2	2	0	1	0	1	0	0	3	0	0
1	0	0	1	0	3	0	0	0	0	3	0	1	3	0	0	0	3	1	1	0	0	1	0	0	2	1	0	0	0	1	0	0	2	0	0	1	0	0	2	1	0	0	1	1	0	0	2	1	1
2	0	0	1	0	4	1	0	0	0	4	1	1	1	0	0	0	2	0	1	0	0	0	1	0	2	1	0	0	0	3	2	2	3	0	0	1	0	1	3	1	0	1	1	1	2	0	3	2	0
3	0	0	1	0	3	1	0	0	0	4	1	1	1	0	0	0	2	0	1	0	0	0	1	0	2	1	0	0	0	3	2	2	4	0	0	1	0	1	3	1	0	0	1	1	2	0	2	2	0
2	0	0	1	0	3	1	2	2	0	4	2	1	1	0	0	0	2	0	1	0	0	0	1	0	2	1	2	0	0	3	0	0	2	1	0	3	0	1	2	0	0	0	0	1	2	0	2	2	0
1	1	0	1	2	3	1	0	1	1	3	2	1	1	0	0	0	2	0	1	0	0	0	1	0	2	1	0	0	0	3	0	0	1	1	0	1	0	1	3	0	1	0	0	1	3	0	2	2	0
2	0	1	1	2	3	0	0	0	0	4	2	1	1	0	0	0	2	0	2	0	0	0	1	0	2	1	0	0	0	3	0	0	2	1	0	3	0	0	2	1	0	0	0	3	0	0	3	2	0
0	1	0	1	0	3	1	0	1	1	3	1	3	1	0	0	0	2	0	3	0	0	1	1	0	2	1	0	0	0	3	0	0	1	1	0	1	0	1	3	0	3	2	0	1	3	0	3	2	0
3	2	0	1	0	3	0	0	2	0	3	0	1	1	0	0	2	2	0	3	0	0	2	0	0	2	1	0	0	0	1	0	0	4	1	0	1	1	2	3	1	0	2	1	1	0	0	3	1	0
2	2	0	1	0	4	0	0	2	0	3	0	1	0	0	0	2	2	0	3	0	0	2	0	0	2	1	0	0	0	0	0	0	3	1	0	1	1	2	3	1	0	3	2	1	0	0	4	0	0
3	2	0	1	0	4	0	0	0	0	4	1	1	1	0	0	0	1	0	1	0	0	0	0	0	1	1	2	0	0	1	0	0	3	1	0	0	0	0	3	0	0	3	0	1	0	0	4	1	0
1	0	0	1	0	4	0	0	0	0	4	3	1	1	0	0	2	0	1	2	0	2	0	0	0	0	0	0	1	0	3	0	0	1	1	0	0	1	0	2	0	0	3	0	3	0	0	4	0	0
4	0	2	1	0	3	0	0	0	0	4	1	1	3	0	1	0	1	1	3	0	1	0	0	0	0	1	0	0	0	1	0	0	4	1	0	0	0	0	3	0	0	2	0	1	2	2	2	3	2
2	3	0	1	0	3	0	0	1	1	3	0	1	1	0	0	0	1	0	1	0	0	1	0	0	1	1	2	0	0	1	0	0	3	1	0	0	0	0	3	0	1	2	0	1	1	0	3	1	0
2	0	0	1	0	4	0	0	0	0	3	1	1	1	0	0	0	0	0	1	0	0	1	1	0	0	0	0	1	0	3	2	2	3	1	0	0	1	0	3	0	0	3	0	1	2	0	3	0	0
2	2	0	1	1	4	0	0	0	0	3	0	1	3	0	0	0	0	1	1	0	0	0	1	0	1	0	2	1	0	1	0	0	3	0	0	0	1	0	2	1	0	3	1	1	0	0	3	0	0
0	0	2	1	2	4	0	0	0	0	2	1	1	1	0	0	0	0	0	1	0	0	1	1	0	0	1	0	0	0	3	0	0	1	1	0	0	0	0	2	0	0	3	0	1	2	0	3	1	0
0	0	0	1	2	4	0	0	0	0	2	1	1	1	0	0	0	0	0	1	0	0	1	1	0	0	1	0	0	0	3	0	0	1	1	0	0	0	0	3	0	0	3	0	1	2	0	3	1	0
2	2	0	1	1	4	0	0	0	0	2	0	1	3	0	0	0	0	1	1	0	0	1	1	0	1	1	2	0	0	1	0	0	3	1	0	0	0	0	2	0	0	3	0	1	0	0	3	1	0
1	0	1	1	0	1	0	1	0	0	4	0	1	1	0	0	0	2	0	1	0	0	0	0	0	0	1	0	1	0	1	0	0	4	0	0	0	2	3	2	1	0	0	1	1	0	0	2	1	0
0	0	1	1	0	2	0	1	0	0	3	0	1	0	0	0	0	2	0	1	0	0	1	0	0	0	1	0	1	0	0	0	0	3	1	0	0	2	3	2	0	0	1	1	1	0	0	3	0	0
0	0	0	1	0	3	0	0	0	0	4	2	1	1	0	0	2	1	1	1	0	2	1	0	0	0	0	0	1	0	3	0	0	3	1	0	0	1	2	2	1	0	1	0	3	0	0	3	0	0
0	0	0	1	0	3	0	0	0	0	4	2	1	0	0	0	2	1	1	1	0	2	1	0	0	0	1	0	0	0	2	0	0	3	1	0	0	0	2	2	1	0	1	1	3	0	0	3	0	0
2	0	0	1	0	2	0	0	0	0	4	0	1	3	0	0	0	2	1	1	0	0	0	0	0	0	1	0	0	0	1	0	0	4	0	0	0	0	2	2	2	0	1	1	1	0	0	1	1	0
0	0	0	1	0	2	0	0	0	0	4	0	1	1	0	0	0	2	1	1	0	0	0	0	0	0	1	0	0	0	1	0	0	3	0	0	0	2	3	2	3	0	1	1	1	0	0	3	1	0
2	0	2	1	0	4	0	0	0	0	4	0	1	3	0	1	0	3	1	3	0	0	1	0	0	2	0	0	1	0	1	0	0	3	0	0	1	1	0	3	1	0	1	1	1	2	2	3	2	2
1	0	0	1	0	3	0	0	0	0	3	0	1	1	0	0	0	2	1	1	0	0	1	0	0	2	1	0	0	0	1	0	0	4	0	0	1	0	0	2	1	0	0	1	1	0	0	3	1	1
0	0	0	1	2	4	1	0	0	0	3	1	1	0	0	0	0	2	0	1	0	0	0	1	0	2	1	0	0	0	2	0	0	1	0	0	1	0	1	3	1	0	1	2	1	2	0	3	1	0
1	2	1	1	2	4	1	0	0	0	4	1	1	1	0	0	0	2	0	3	0	0	0	0	0	3	0	2	1	0	3	0	0	3	2	0	1	1	0	2	0	0	1	0	1	2	0	4	2	0
4	2	0	1	0	3	0	0	2	0	4	1	1	1	0	0	2	2	0	3	0	0	1	0	0	2	1	0	0	0	1	0	0	4	1	0	1	1	2	3	1	0	2	1	1	0	0	3	1	0
3	2	1	1	1	4	1	0	0	0	3	1	1	2	0	0	0	2	0	1	0	0	0	1	0	3	1	2	0	0	0	0	0	3	1	0	1	0	0	2	0	0	1	1	1	0	0	3	0	0
2	2	0	1	0	4	0	0	0	0	4	0	1	1	0	0	0	1	0	1	0	0	0	0	0	1	1	2	0	0	1	0	0	3	0	0	0	0	0	3	1	0	3	1	1	0	0	4	1	0
3	2	0	1	0	3	0	0	0	0	4	0	1	1	0	0	0	1	0	1	0	0	0	0	0	1	1	2	0	0	1	0	0	4	0	0	0	0	0	3	1	0	2	1	1	0	0	3	1	0
2	1	0	1	0	3	0	0	1	1	4	1	1	1	0	0	0	0	0	1	0	0	0	1	0	0	1	0	0	0	3	2	2	3	0	0	0	0	0	3	1	1	2	1	1	3	0	2	1	0
0	0	0	1	0	4	0	0	0	0	4	2	1	1	0	0	2	0	1	2	0	2	0	0	0	0	1	0	0	0	3	0	0	1	0	0	0	0	0	2	1	0	3	1	3	0	0	4	1	0
1	3	0	1	2	3	0	0	1	1	4	1	1	1	0	0	0	0	1	3	0	0	0	0	0	1	1	2	0	0	3	0	0	3	2	0	0	0	0	2	0	1	2	0	1	3	0	3	3	0
0	1	2	1	2	3	0	0	1	1	3	1	1	1	0	0	0	0	0	1	0	0	0	1	0	0	1	0	0	0	3	0	0	1	0	0	0	0	0	2	1	1	2	1	1	3	0	2	1	0
0	0	0	1	2	4	0	0	0	0	3	1	1	1	0	0	0	0	0	1	0	0	0	1	0	0	0	0	1	0	3	0	0	1	0	0	0	1	0	3	1	0	3	1	1	2	0	3	0	0
1	0	0	1	0	4	0	0	0	0	4	2	3	1	0	0	0	0	0	3	0	0	0	1	0	0	1	0	0	0	3	0	0	1	1	0	0	0	0	3	0	2	4	0	1	2	0	4	1	0
1	0	0	1	2	4	0	0	0	0	3	2	1	1	0	0	0	0	0	1	0	0	0	1	0	0	1	0	0	0	3	0	0	1	1	0	0	0	0	3	0	0	3	0	1	2	0	3	1	0
0	1	0	1	0	3	0	0	1	1	3	1	3	1	0	0	0	0	0	3	0	0	1	1	0	0	1	0	0	0	3	0	0	1	1	0	0	0	0	3	0	3	3	0	1	3	0	3	1	0
2	3	0	1	0	3	0	0	3	1	3	0	1	1	0	0	2	0	0	3	0	0	1	0	0	0	1	0	0	0	1	0	0	3	1	0	0	1	2	3	0	1	3	1	1	1	0	3	1	0
1	2	0	1	2	1	0	0	0	0	5	0	1	1	0	0	0	0	0	3	0	0	0	0	0	1	1	2	0	0	3	0	0	5	1	0	0	0	2	2	1	0	0	1	1	2	0	2	3	0
3	0	0	1	0	1	0	0	0	0	4	1	1	1	0	0	0	0	0	1	0	0	1	1	0	0	1	0	0	0	3	2	2	5	1	0	0	0	2	3	0	0	0	0	1	2	0	0	1	0
0	0	0	1	0	3	0	0	0	0	4	0	1	1	0	0	0	1	1	1	0	0	0	0	0	0	0	0	1	0	1	0	0	4	0	0	0	1	2	2	2	0	1	1	1	0	0	3	0	0
4	0	0	1	0	1	0	0	0	0	4	1	1	3	0	0	0	2	1	1	0	0	0	0	0	0	1	0	0	0	1	0	0	5	1	0	0	0	2	2	1	0	0	0	1	0	0	0	1	0
0	2	1	1	2	4	1	0	0	0	4	0	1	1	0	0	0	2	0	3	0	0	0	0	0	3	0	2	1	0	3	0	0	3	1	0	1	1	0	2	1	0	1	1	1	2	0	4	2	0
0	2	1	1	2	4	1	0	0	0	4	0	1	0	0	0	0	2	0	3	0	0	0	0	0	3	1	2	0	0	2	0	0	3	1	0	1	0	0	2	1	0	1	2	1	2	0	4	2	0
0	0	1	1	0	4	0	1	0	0	3	0	1	1	0	0	0	3	0	1	0	0	1	0	0	2	1	0	1	0	1	0	0	1	0	0	1	2	2	2	1	0	1	1	1	0	0	4	1	0
0	1	1	1	0	3	0	1	1	1	3	0	1	1	0	0	0	2	0	1	0	2	1	0	0	2	1	0	1	0	1	0	0	1	0	0	1	0	0	2	1	1	2	1	1	1	0	3	1	0
0	0	0	1	0	4	1	2	2	0	4	1	1	0	0	0	0	2	0	1	0	0	0	1	0	2	1	2	0	0	2	0	0	1	0	0	3	0	1	2	1	0	1	2	1	2	0	3	1	0
3	0	2	1	0	4	0	0	0	0	4	1	1	3	0	1	0	3	1	3	0	0	1	0	0	2	1	0	0	0	1	0	0	3	1	0	1	0	0	3	0	0	1	0	1	2	2	3	3	2
1	0	1	1	2	4	0	0	0	0	4	2	1	0	0	0	0	2	0	2	0	0	0	1	0	2	1	0	0	0	2	0	0	1	1	0	3	0	0	2	1	0	1	1	3	0	0	4	1	0
0	0	1	1	0	4	0	1	0	0	2	0	1	0	0	0	0	3	0	1	0	0	2	0	0	2	1	0	1	0	0	0	0	1	1	0	1	2	2	2	0	0	1	1	1	0	0	4	0	0
1	0	0	1	0	3	0	0	0	0	2	0	1	1	0	0	0	2	1	1	0	0	2	0	0	2	1	0	0	0	1	0	0	4	1	0	1	0	0	2	0	0	0	0	1	0	0	3	1	1
0	0	0	1	2	4	1	0	0	0	2	1	1	1	0	0	0	2	0	1	0	0	1	1	0	2	0	0	1	0	3	0	0	1	1	0	1	1	1	3	0	0	1	0	1	2	0	3	1	0
0	0	1	1	0	4	0	1	0	0	3	0	1	0	0	0	0	2	0	1	0	0	1	0	0	0	1	0	1	0	0	0	0	1	1	0	0	2	2	2	0	0	3	1	1	0	0	4	0	0
0	0	0	1	0	4	0	0	0	0	4	1	3	1	0	0	0	0	0	3	0	0	0	1	0	0	1	0	0	0	3	0	0	1	0	0	0	0	0	3	1	2	4	1	1	2	0	4	1	0
1	0	0	1	0	3	0	0	0	0	4	1	3	1	0	0	0	0	0	3	0	0	0	1	0	0	1	0	0	0	3	0	0	2	0	0	0	0	0	3	1	2	3	1	1	2	0	3	1	0
3	2	0	1	1	4	0	0	0	0	3	1	1	3	0	0	0	0	1	1	0	0	0	1	0	1	1	2	0	0	1	0	0	3	1	0	0	0	0	2	0	0	3	0	1	0	0	3	1	0
1	0	1	1	0	2	0	1	0	0	4	1	1	0	0	0	0	2	0	1	0	0	0	0	0	0	1	0	1	0	0	0	0	3	1	0	0	2	3	2	0	0	1	1	1	0	0	3	0	0
1	0	0	1	0	1	0	0	0	0	4	0	1	1	0	0	0	2	1	1	0	0	0	0	0	0	1	0	0	0	1	0	0	4	0	0	0	2	3	2	3	0	0	1	1	0	0	2	1	0
4	0	0	1	0	1	0	0	0	0	4	1	1	1	0	0	0	2	1	1	0	0	0	0	0	0	1	0	0	0	1	2	0	5	1	0	0	0	2	2	1	0	0	0	1	0	0	0	1	0
0	3	1	1	2	3	1	0	1	1	4	0	1	1	0	0	0	2	0	3	0	0	0	0	0	3	1	2	0	0	3	0	0	3	1	0	1	0	0	2	1	1	0	1	1	3	0	3	3	0
0	0	0	1	0	4	0	0	0	0	4	2	1	1	0	0	2	2	1	1	0	2	1	0	0	2	0	0	1	0	3	0	0	1	0	0	1	1	0	2	1	0	1	1	3	0	0	4	0	1
2	0	1	1	0	3	0	1	0	0	3	1	1	1	0	0	0	2	0	1	0	2	1	0	0	2	1	0	1	0	1	0	0	2	1	0	1	0	0	2	0	0	2	0	1	0	0	3	1	0
1	0	1	1	0	4	0	1	0	0	3	1	1	1	0	0	0	2	0	1	0	2	1	0	0	2	0	0	2	0	1	0	0	1	1	0	1	1	0	2	0	0	3	0	1	0	0	4	0	0
1	2	1	1	2	4	1	0	0	0	4	1	1	1	0	0	0	2	0	3	0	0	0	0	0	3	1	2	0	0	3	0	0	3	2	0	1	0	0	2	0	0	1	0	1	2	0	4	3	0
1	0	0	1	0	4	0	0	0	0	3	1	1	1	0	0	0	2	1	1	0	0	1	0	0	2	1	0	0	0	1	0	0	3	1	0	1	0	0	2	0	0	1	0	1	0	0	4	1	1
1	1	0	1	0	3	0	0	1	1	3	1	1	1	0	0	0	2	1	1	0	0	1	0	0	2	1	0	0	0	1	0	0	3	1	0	1	0	0	2	0	1	0	0	1	1	0	3	1	1
2	0	0	1	0	3	1	0	0	0	4	2	3	1	0	0	0	2	0	3	0	0	0	1	0	2	1	0	0	0	3	0	0	2	1	0	1	0	1	3	0	2	2	0	1	2	0	3	2	0
0	0	1	1	0	4	0	1	0	0	2	0	1	1	0	0	0	3	0	1	0	0	2	0	0	2	1	0	1	0	1	0	0	1	1	0	1	2	2	2	0	0	1	0	1	0	0	4	1	0
0	0	1	1	0	4	0	1	0	0	2	0	1	1	0	0	0	3	0	1	0	0	2	0	0	2	0	0	2	0	1	0	0	1	1	0	1	3	2	2	0	0	1	0	1	0	0	4	0	0
2	1	0	1	0	3	1	0	1	1	3	1	1	1	0	0	0	2	0	1	0	0	1	1	0	2	1	0	0	0	3	2	2	3	1	0	1	0	1	3	0	1	0	0	1	3	0	2	2	0
1	0	1	1	0	3	0	1	0	0	2	0	1	1	0	0	0	2	0	1	0	2	2	0	0	2	1	0	1	0	1	0	0	2	1	0	1	0	0	2	0	0	2	0	1	0	0	3	1	0
1	2	1	1	2	3	1	0	0	0	3	0	1	1	0	0	0	2	0	3	0	0	1	0	0	3	1	2	0	0	3	0	0	4	2	0	1	0	0	2	0	0	0	0	1	2	0	3	3	0
0	0	0	1	0	4	0	0	0	0	4	2	1	0	0	0	2	0	1	2	0	2	0	0	0	0	1	0	0	0	2	0	0	1	0	0	0	0	0	2	1	0	3	2	3	0	0	4	0	0
1	2	0	1	2	4	0	0	0	0	4	1	1	0	0	0	0	0	1	3	0	0	0	0	0	1	1	2	0	0	2	0	0	3	2	0	0	0	0	2	0	0	3	1	1	2	0	4	2	0
2	1	0	1	0	3	0	0	1	1	3	1	1	1	0	0	0	0	0	1	0	0	1	1	0	0	1	0	0	0	3	2	2	3	1	0	0	0	0	3	0	1	2	0	1	3	0	2	1	0
1	0	0	1	0	3	0	0	0	0	3	2	1	1	0	0	2	0	1	2	0	2	1	0	0	0	1	0	0	0	3	0	0	2	1	0	0	0	0	2	0	0	2	0	3	0	0	3	1	0
0	3	0	1	2	3	0	0	1	1	3	0	1	1	0	0	0	0	1	3	0	0	1	0	0	1	1	2	0	0	3	0	0	3	2	0	0	0	0	2	0	1	2	0	1	3	0	3	3	0
0	2	0	1	2	4	0	0	0	0	3	0	1	0	0	0	0	0	1	3	0	0	1	0	0	1	1	2	0	0	2	0	0	3	2	0	0	0	0	2	0	0	3	1	1	2	0	4	2	0
2	1	0	1	0	1	0	0	1	1	5	1	1	1	0	0	0	0	0	1	0	0	0	1	0	0	1	0	0	0	3	2	2	4	0	0	0	0	2	3	1	1	0	1	1	3	0	0	1	0
0	3	0	1	2	1	0	0	1	1	5	0	1	1	0	0	0	0	0	3	0	0	0	0	0	1	1	2	0	0	3	0	0	4	1	0	0	0	2	2	1	1	0	1	1	3	0	2	3	0
2	0	2	1	0	2	0	0	0	0	5	0	1	2	0	1	0	2	1	3	0	1	0	0	0	0	1	0	0	0	0	0	0	4	0	0	0	0	2	3	2	0	1	2	1	2	2	1	2	2
3	2	0	1	0	2	0	0	0	0	5	1	1	1	0	0	0	1	0	1	0	0	0	0	0	1	1	2	0	0	1	0	0	4	1	0	1	0	2	3	0	0	1	0	1	0	0	3	1	0
4	2	0	1	0	1	0	0	0	0	5	1	1	1	0	0	0	1	0	1	0	0	0	0	0	1	1	2	0	0	1	0	0	5	1	0	1	0	2	3	0	0	0	0	1	0	0	2	1	0
1	0	0	1	0	2	0	0	0	0	4	0	1	1	0	0	0	1	1	1	0	0	0	0	0	0	1	0	0	0	1	0	0	5	0	0	0	0	2	2	2	0	0	1	1	0	0	2	1	0
0	0	0	1	0	2	0	0	0	0	4	0	1	1	0	0	0	2	1	1	0	0	0	0	0	0	0	0	1	0	1	0	0	3	0	0	0	3	3	2	3	0	1	1	1	0	0	3	0	0
3	0	0	1	0	2	0	0	0	0	4	1	1	1	0	0	0	2	1	1	0	0	0	0	0	0	0	0	1	0	1	2	0	4	1	0	0	1	2	2	1	0	1	0	1	0	0	1	0	0
1	0	0	1	0	2	0	0	0	0	3	0	1	3	0	0	0	2	1	1	0	0	1	0	0	0	1	0	0	0	1	0	0	4	1	0	0	0	2	2	1	0	0	0	1	0	0	0	1	0
0	1	0	1	0	2	0	0	1	1	3	0	1	3	0	0	0	2	1	1	0	0	1	0	0	0	1	0	0	0	1	0	0	3	1	0	0	0	2	2	1	1	0	0	1	1	0	0	1	0
0	0	0	1	0	4	0	0	0	0	3	0	1	1	0	0	0	2	1	1	0	0	1	0	0	2	1	0	0	0	1	0	0	3	0	0	1	0	0	2	1	0	1	1	1	0	0	4	1	1
1	0	0	1	0	3	0	0	0	0	4	2	1	1	0	0	2	2	1	1	0	2	1	0	0	2	1	0	0	0	3	0	0	2	0	0	1	0	0	2	1	0	0	1	3	0	0	3	1	1
2	0	0	1	0	3	0	0	0	0	3	1	1	1	0	0	0	2	1	1	0	0	1	0	0	2	1	0	0	0	1	0	0	4	1	0	1	0	0	2	0	0	0	0	1	0	0	3	1	1
0	3	1	1	2	3	1	0	1	1	3	0	1	1	0	0	0	2	0	3	0	0	1	0	0	3	1	2	0	0	3	0	0	3	2	0	1	0	0	2	0	1	0	0	1	3	0	3	3	0
3	0	2	1	0	4	0	0	0	0	4	1	1	3	0	1	0	1	1	3	0	1	0	0	0	0	0	0	1	0	1	0	0	3	1	0	0	1	0	3	0	0	3	0	1	2	2	3	2	2
1	2	0	1	2	3	0	0	0	0	3	0	1	1	0	0	0	0	1	3	0	0	1	0	0	1	1	2	0	0	3	0	0	4	2	0	0	0	0	2	0	0	2	0	1	2	0	3	3	0
3	2	0	1	0	3	0	0	2	0	3	0	1	1	0	0	2	0	0	3	0	0	1	0	0	0	1	0	0	0	1	0	0	4	1	0	0	1	2	3	0	0	3	1	1	0	0	3	1	0
1	0	0	1	2	3	0	0	0	0	2	1	1	1	0	0	0	0	0	1	0	0	1	1	0	0	1	0	0	0	3	0	0	2	1	0	0	0	0	3	0	0	2	0	1	2	0	2	1	0
2	2	0	1	1	4	0	0	0	0	2	0	1	3	0	0	0	0	1	1	0	0	1	1	0	1	0	2	1	0	1	0	0	3	1	0	0	1	0	2	0	0	3	0	1	0	0	3	0	0
2	0	0	1	0	2	0	0	0	0	4	1	1	1	0	0	0	0	0	1	0	0	1	1	0	0	0	0	1	0	3	2	2	4	1	0	0	1	2	3	0	0	1	0	1	2	0	1	0	0
0	2	0	1	2	2	0	0	0	0	4	0	1	1	0	0	0	0	0	3	0	0	1	0	0	1	1	2	0	0	3	0	0	4	2	0	0	0	2	2	0	0	1	0	1	2	0	3	3	0
2	1	0	1	0	1	0	0	1	1	4	0	1	1	0	0	0	2	1	1	0	0	0	0	0	0	1	0	0	0	1	2	0	4	0	0	0	0	2	2	2	1	0	1	1	1	0	0	1	0
3	0	0	1	0	2	0	0	0	0	4	1	1	0	0	0	0	2	1	1	0	0	0	0	0	0	1	0	0	0	0	2	0	4	1	0	0	0	2	2	1	0	1	1	1	0	0	1	0	0
1	0	0	1	0	3	0	0	0	0	4	1	1	2	0	0	0	2	1	1	0	0	0	0	0	0	1	0	0	0	0	0	0	3	1	0	0	0	2	2	1	0	1	1	1	0	0	1	0	0
3	0	0	1	0	1	0	0	0	0	3	0	1	3	0	0	0	2	1	1	0	0	1	0	0	0	1	0	0	0	1	0	0	5	1	0	0	0	2	2	1	0	0	0	1	0	0	0	1	0
2	1	0	1	0	3	1	0	1	1	4	1	1	1	0	0	0	2	0	1	0	0	0	1	0	2	1	0	0	0	3	2	2	3	0	0	1	0	1	3	1	1	0	1	1	3	0	2	2	0
2	2	0	1	0	4	0	0	2	0	4	0	1	1	0	0	2	2	0	3	0	0	1	0	0	2	0	0	1	0	1	0	0	3	0	0	1	2	2	3	2	0	3	2	1	0	0	4	0	0
1	0	1	1	2	3	0	0	0	0	4	1	1	1	0	0	0	2	0	2	0	0	0	1	0	2	1	0	0	0	3	0	0	2	0	0	3	0	0	2	2	0	0	1	3	0	0	3	2	0
1	0	0	1	0	4	1	2	2	0	4	2	1	1	0	0	0	2	0	1	0	0	0	1	0	2	1	2	0	0	3	0	0	1	1	0	3	0	1	2	0	0	1	0	1	2	0	3	2	0
3	0	2	1	0	4	0	0	0	0	4	1	1	3	0	1	0	3	1	3	0	0	1	0	0	2	0	0	1	0	1	0	0	3	1	0	1	1	0	3	0	0	1	0	1	2	2	3	2	2
1	0	0	1	0	4	1	0	0	0	4	2	3	0	0	0	0	2	0	3	0	0	0	1	0	2	1	0	0	0	2	0	0	1	1	0	1	0	1	3	0	2	3	1	1	2	0	4	1	0
0	1	1	1	0	3	0	1	1	1	2	0	1	1	0	0	0	3	0	1	0	0	2	0	0	2	1	0	1	0	1	0	0	1	1	0	1	2	2	2	0	1	0	0	1	1	0	3	1	0
2	0	0	1	0	4	0	0	0	0	2	0	1	2	0	0	0	3	1	1	0	0	2	0	0	2	1	0	0	0	0	0	0	3	1	0	1	0	0	2	0	0	1	1	1	0	0	3	0	1
2	3	0	1	0	3	0	0	1	1	4	0	1	1	0	0	0	1	0	1	0	0	0	0	0	1	1	2	0	0	1	0	0	3	0	0	0	0	0	3	1	1	2	1	1	1	0	3	1	0
0	1	0	1	0	3	0	0	1	1	4	2	1	1	0	0	2	0	1	2	0	2	0	0	0	0	1	0	0	0	3	0	0	1	0	0	0	0	0	2	1	1	2	1	3	1	0	3	1	0
0	0	0	1	0	4	0	0	0	0	4	1	3	0	0	0	0	0	0	3	0	0	0	1	0	0	1	0	0	0	2	0	0	1	0	0	0	0	0	3	1	2	4	2	1	2	0	4	0	0
0	1	0	1	2	3	0	0	1	1	2	1	1	1	0	0	0	0	0	1	0	0	1	1	0	0	1	0	0	0	3	0	0	1	1	0	0	0	0	3	0	1	2	0	1	3	0	2	1	0
2	0	0	1	0	2	0	0	0	0	5	1	1	1	0	0	0	0	0	1	0	0	0	1	0	0	0	0	1	0	3	2	2	4	0	0	0	1	2	3	1	0	1	1	1	2	0	1	0	0
1	2	0	1	2	2	0	0	0	0	5	1	1	0	0	0	0	0	0	3	0	0	0	0	0	1	1	2	0	0	2	0	0	4	2	0	0	0	2	2	0	0	1	1	1	2	0	3	2	0
1	0	0	1	0	3	0	0	0	0	4	1	1	1	0	0	0	1	1	1	0	0	0	0	0	0	0	0	1	0	1	0	0	4	1	0	0	1	2	2	1	0	1	0	1	0	0	3	0	0
2	0	0	1	0	2	0	0	0	0	3	0	1	3	0	0	0	2	1	1	0	0	1	0	0	0	0	0	1	0	1	0	0	4	1	0	0	1	2	2	1	0	1	0	1	0	0	1	0	0
2	0	0	1	0	4	0	0	0	0	3	0	1	1	0	0	0	3	1	1	0	0	1	0	0	2	1	0	0	0	1	2	0	3	0	0	1	0	0	2	1	0	1	1	1	0	0	3	1	1
0	0	0	1	0	4	0	0	0	0	3	0	1	0	0	0	0	2	1	1	0	0	1	0	0	2	1	0	0	0	0	0	0	3	0	0	1	0	0	2	1	0	1	2	1	0	0	4	0	1
1	0	1	1	0	3	0	1	0	0	3	0	1	1	0	0	0	3	0	1	0	0	1	0	0	2	1	0	1	0	1	0	0	2	0	0	1	2	2	2	1	0	0	1	1	0	0	3	1	0
0	1	0	1	0	3	1	2	3	1	4	1	1	1	0	0	0	2	0	1	0	0	0	1	0	2	1	2	0	0	3	0	0	1	0	0	3	0	1	2	1	1	0	1	1	3	0	2	2	0
0	0	0	1	0	4	1	0	0	0	4	1	3	1	0	0	0	2	0	3	0	0	0	1	0	2	1	0	0	0	3	0	0	1	0	0	1	0	1	3	1	2	3	1	1	2	0	4	2	0
1	0	1	1	0	4	0	1	0	0	3	1	1	0	0	0	0	3	0	1	0	0	1	0	0	2	1	0	1	0	0	0	0	1	1	0	1	2	2	2	0	0	1	1	1	0	0	4	0	0
2	0	0	1	0	4	0	0	0	0	2	0	1	3	0	0	0	3	1	1	0	0	2	0	0	2	1	0	0	0	1	0	0	3	1	0	1	0	0	2	0	0	1	0	1	0	0	3	1	1
0	1	1	1	2	3	0	0	1	1	3	1	1	1	0	0	0	2	0	2	0	0	1	1	0	2	1	0	0	0	3	0	0	1	1	0	3	0	0	2	1	1	0	0	3	1	0	3	2	0
3	3	0	1	0	3	0	0	1	1	4	1	1	1	0	0	0	1	0	1	0	0	0	0	0	1	1	2	0	0	1	0	0	3	1	0	0	0	0	3	0	1	2	0	1	1	0	3	1	0
2	1	2	1	0	3	0	0	1	1	3	0	1	3	0	1	0	1	1	3	0	1	1	0	0	0	1	0	0	0	1	0	0	3	1	0	0	0	0	3	0	1	2	0	1	3	2	2	3	2
3	0	2	1	0	1	0	0	0	0	5	0	1	3	0	1	0	2	1	3	0	1	0	0	0	0	1	0	0	0	1	0	0	5	0	0	0	0	2	3	2	0	0	1	1	2	2	0	3	2
1	0	0	1	0	3	0	0	0	0	5	3	1	1	0	0	2	1	1	1	0	2	0	0	0	0	0	0	1	0	3	0	0	3	1	0	0	1	2	2	1	0	1	0	3	0	0	3	0	0
0	0	0	1	0	3	0	0	0	0	4	2	1	1	0	0	2	1	1	1	0	2	1	0	0	0	1	0	0	0	3	0	0	3	1	0	0	0	2	2	1	0	1	0	3	0	0	3	1	0
3	0	0	1	0	2	0	0	0	0	4	1	1	1	0	0	0	2	1	1	0	0	0	0	0	0	1	0	0	0	1	2	0	4	1	0	0	0	2	2	1	0	1	0	1	0	0	1	1	0
0	1	0	1	0	2	0	0	1	1	3	0	1	1	0	0	0	1	1	1	0	0	1	0	0	0	1	0	0	0	1	0	0	4	1	0	0	0	2	2	1	1	0	0	1	1	0	2	1	0
3	0	2	1	0	3	0	0	0	0	4	0	1	3	0	1	0	3	1	3	0	0	1	0	0	2	1	0	0	0	1	0	0	4	0	0	1	0	0	3	1	0	0	1	1	2	2	2	3	2
2	0	2	1	0	4	0	0	0	0	4	0	1	2	0	1	0	3	1	3	0	0	1	0	0	2	1	0	0	0	0	0	0	3	0	0	1	0	0	3	1	0	1	2	1	2	2	3	2	2
2	0	0	1	0	4	0	0	0	0	3	0	1	1	0	0	0	3	1	1	0	0	1	0	0	2	0	0	1	0	1	2	0	3	0	0	1	1	0	2	1	0	1	1	1	0	0	3	0	1
1	0	0	1	0	3	1	0	0	0	3	2	1	1	0	0	2	2	0	1	0	0	0	1	0	2	1	0	0	0	3	0	0	2	0	0	1	0	1	2	1	0	0	1	1	2	0	2	2	0
3	1	2	1	0	3	0	0	1	1	4	1	1	3	0	1	0	3	1	3	0	0	1	0	0	2	1	0	0	0	1	0	0	3	1	0	1	0	0	3	0	1	0	0	1	3	2	2	3	2
1	0	0	1	2	4	1	0	0	0	3	2	1	1	0	0	0	2	0	1	0	0	0	1	0	2	0	0	1	0	3	0	0	1	1	0	1	1	1	3	0	0	1	0	1	2	0	3	1	0
0	0	0	1	0	4	1	0	0	0	2	2	1	0	0	0	2	2	0	1	0	0	1	1	0	2	1	0	0	0	2	0	0	1	1	0	1	0	1	2	0	0	1	1	1	2	0	3	1	0
2	3	0	1	0	3	0	0	3	1	3	0	1	1	0	0	2	2	0	3	0	0	2	0	0	2	1	0	0	0	1	0	0	3	1	0	1	1	2	3	1	1	2	1	1	1	0	3	1	0
2	2	1	1	1	4	1	0	0	0	2	0	1	2	0	0	0	2	0	1	0	0	1	1	0	3	1	2	0	0	0	0	0	3	1	0	1	0	0	2	0	0	1	1	1	0	0	3	0	0
0	0	1	1	0	4	0	1	0	0	3	0	1	1	0	0	0	2	0	1	0	0	1	0	0	0	0	0	2	0	1	0	0	1	1	0	0	3	2	2	0	0	3	0	1	0	0	4	0	0
2	0	0	1	0	4	0	0	0	0	3	1	1	1	0	0	0	0	0	1	0	0	1	1	0	0	1	0	0	0	3	2	2	3	1	0	0	0	0	3	0	0	3	0	1	2	0	3	1	0
0	0	0	1	0	4	0	0	0	0	3	2	1	1	0	0	2	0	1	2	0	2	1	0	0	0	1	0	0	0	3	0	0	1	1	0	0	0	0	2	0	0	3	0	3	0	0	4	1	0
0	0	2	1	2	4	0	0	0	0	3	1	1	1	0	0	0	0	0	1	0	0	0	1	0	0	1	0	0	0	3	0	0	1	0	0	0	0	0	2	1	0	3	1	1	2	0	3	1	0
0	1	2	1	2	3	0	0	1	1	2	1	1	1	0	0	0	0	0	1	0	0	1	1	0	0	1	0	0	0	3	0	0	1	1	0	0	0	0	2	0	1	2	0	1	3	0	2	1	0
0	0	2	1	2	4	0	0	0	0	2	1	1	1	0	0	0	0	0	1	0	0	1	1	0	0	0	0	1	0	3	0	0	1	1	0	0	1	0	2	0	0	3	0	1	2	0	3	0	0
2	2	0	1	0	2	0	0	0	0	5	0	1	1	0	0	0	1	0	1	0	0	0	0	0	1	0	2	1	0	1	0	0	4	0	0	1	1	2	3	1	0	1	1	1	0	0	3	0	0
0	2	0	1	2	2	0	0	0	0	5	0	1	1	0	0	0	0	0	3	0	0	0	0	0	1	0	2	1	0	3	0	0	4	1	0	0	1	2	2	1	0	1	1	1	2	0	3	2	0
2	0	2	1	0	2	0	0	0	0	5	0	1	3	0	1	0	2	1	3	0	1	0	0	0	0	1	0	0	0	1	0	0	4	0	0	0	0	2	3	2	0	1	1	1	2	2	1	3	2
3	3	0	1	0	1	0	0	1	1	5	1	1	1	0	0	0	1	0	1	0	0	0	0	0	1	1	2	0	0	1	0	0	4	1	0	1	0	2	3	0	1	0	0	1	1	0	2	1	0
1	0	1	1	0	2	0	1	0	0	4	1	1	1	0	0	0	2	0	1	0	0	0	0	0	0	1	0	1	0	1	0	0	3	1	0	0	2	3	2	0	0	1	0	1	0	0	3	1	0
3	0	2	1	0	2	0	0	0	0	5	1	1	3	0	1	0	2	1	3	0	1	0	0	0	0	1	0	0	0	1	0	0	4	1	0	0	0	2	3	1	0	1	0	1	2	2	1	3	2
2	2	0	1	0	2	0	0	0	0	4	0	1	1	0	0	0	1	0	1	0	0	1	0	0	1	0	2	1	0	1	0	0	4	1	0	1	1	2	3	0	0	1	0	1	0	0	3	0	0
3	0	2	1	0	1	0	0	0	0	4	0	1	3	0	1	0	2	1	3	0	1	1	0	0	0	1	0	0	0	1	0	0	5	1	0	0	0	2	3	1	0	0	0	1	2	2	0	3	2
2	0	0	1	0	2	0	0	0	0	3	0	1	2	0	0	0	2	1	1	0	0	1	0	0	0	1	0	0	0	0	0	0	4	1	0	0	0	2	2	1	0	1	1	1	0	0	1	0	0
1	0	0	1	0	1	0	0	0	0	3	0	1	1	0	0	0	2	1	1	0	0	1	0	0	0	1	0	0	0	1	0	0	4	1	0	0	2	3	2	2	0	0	0	1	0	0	2	1	0
0	1	0	1	0	3	0	0	1	1	4	2	1	1	0	0	2	2	1	1	0	2	1	0	0	2	1	0	0	0	3	0	0	1	0	0	1	0	0	2	1	1	0	1	3	1	0	3	1	1
1	0	0	1	2	3	1	0	0	0	3	1	1	1	0	0	0	2	0	1	0	0	0	1	0	2	1	0	0	0	3	0	0	2	0	0	1	0	1	3	1	0	0	1	1	2	0	2	2	0
4	0	0	1	0	3	0	0	0	0	3	1	1	1	0	0	0	3	1	1	0	0	1	0	0	2	1	0	0	0	1	2	0	4	1	0	1	0	0	2	0	0	0	0	1	0	0	2	1	1
1	0	0	1	0	4	1	0	0	0	3	3	1	1	0	0	2	2	0	1	0	0	0	1	0	2	0	0	1	0	3	0	0	1	1	0	1	1	1	2	0	0	1	0	1	2	0	3	1	0
0	0	1	1	0	4	0	1	0	0	2	0	1	1	0	0	0	2	0	1	0	2	2	0	0	2	1	0	1	0	1	0	0	1	1	0	1	0	0	2	0	0	3	0	1	0	0	4	1	0
0	1	0	1	0	3	0	0	1	1	2	0	1	3	0	0	0	3	1	1	0	0	2	0	0	2	1	0	0	0	1	0	0	1	1	0	1	0	0	2	0	1	0	0	1	1	0	2	1	1
2	3	1	1	1	3	1	0	1	1	2	0	1	3	0	0	0	2	0	1	0	0	1	1	0	3	1	2	0	0	1	0	0	3	1	0	1	0	0	2	0	1	0	0	1	1	0	2	1	0
0	0	1	1	2	4	0	0	0	0	3	1	1	1	0	0	0	2	0	2	0	0	1	1	0	2	1	0	0	0	3	0	0	1	1	0	3	0	0	2	1	0	1	0	3	0	0	4	2	0
0	0	1	1	0	4	0	1	0	0	4	0	1	1	0	0	0	2	0	1	0	0	0	0	0	0	1	0	1	0	1	0	0	1	0	0	0	2	2	2	1	0	3	1	1	0	0	4	1	0
3	0	0	1	0	3	0	0	0	0	4	1	1	1	0	0	0	0	0	1	0	0	0	1	0	0	1	0	0	0	3	2	2	4	0	0	0	0	0	3	1	0	2	1	1	2	0	2	1	0
2	2	0	1	2	3	0	0	0	0	4	1	1	1	0	0	0	0	1	3	0	0	0	0	0	1	1	2	0	0	3	0	0	4	2	0	0	0	0	2	0	0	2	0	1	2	0	3	3	0
2	0	2	1	0	4	0	0	0	0	3	0	1	3	0	1	0	1	1	3	0	1	1	0	0	0	1	0	0	0	1	0	0	3	1	0	0	0	0	3	0	0	3	0	1	2	2	3	3	2
2	0	0	1	2	3	0	0	0	0	3	2	1	1	0	0	0	0	0	1	0	0	0	1	0	0	1	0	0	0	3	0	0	2	1	0	0	0	0	3	0	0	2	0	1	2	0	2	1	0
3	3	0	1	1	3	0	0	1	1	3	1	1	3	0	0	0	0	1	1	0	0	0	1	0	1	1	2	0	0	1	0	0	3	1	0	0	0	0	2	0	1	2	0	1	1	0	2	1	0
0	0	1	1	0	2	0	1	0	0	4	0	1	1	0	0	0	2	0	1	0	0	0	0	0	0	0	0	2	0	1	0	0	3	0	0	0	3	3	2	1	0	1	1	1	0	0	3	0	0
1	0	1	1	0	2	0	1	0	0	4	1	1	1	0	0	0	2	0	1	0	0	0	0	0	0	0	0	2	0	1	0	0	3	1	0	0	3	3	2	0	0	1	0	1	0	0	3	0	0
3	0	0	1	0	2	0	0	0	0	5	2	1	1	0	0	0	0	0	1	0	0	0	1	0	0	1	0	0	0	3	2	2	4	1	0	0	0	2	3	0	0	1	0	1	2	0	1	1	0
0	3	0	1	2	1	0	0	1	1	4	0	1	1	0	0	0	0	0	3	0	0	1	0	0	1	1	2	0	0	3	0	0	4	2	0	0	0	2	2	0	1	0	0	1	3	0	2	3	0
3	0	0	1	0	1	0	0	0	0	4	0	1	1	0	0	0	2	1	1	0	0	0	0	0	0	1	0	0	0	1	2	0	5	0	0	0	0	2	2	2	0	0	1	1	0	0	0	1	0
2	1	0	1	0	1	0	0	1	1	4	0	1	3	0	0	0	2	1	1	0	0	0	0	0	0	1	0	0	0	1	0	0	4	0	0	0	0	2	2	2	1	0	1	1	1	0	0	1	0
1	0	0	1	0	2	0	0	0	0	3	0	1	1	0	0	0	1	1	1	0	0	1	0	0	0	1	0	0	0	1	0	0	5	1	0	0	0	2	2	1	0	0	0	1	0	0	2	1	0
3	0	0	1	0	3	0	0	0	0	3	0	1	3	0	0	0	3	1	1	0	0	1	0	0	2	1	0	0	0	1	0	0	4	0	0	1	0	0	2	1	0	0	1	1	0	0	2	1	1
0	0	1	1	0	4	0	1	0	0	3	0	1	1	0	0	0	3	0	1	0	0	1	0	0	2	0	0	2	0	1	0	0	1	0	0	1	3	2	2	1	0	1	1	1	0	0	4	0	0
2	0	0	1	0	4	1	0	0	0	4	1	1	1	0	0	0	2	0	1	0	0	0	1	0	2	0	0	1	0	3	2	2	3	0	0	1	1	1	3	1	0	1	1	1	2	0	3	1	0
3	2	0	1	0	3	0	0	2	0	4	0	1	1	0	0	2	2	0	3	0	0	1	0	0	2	1	0	0	0	1	0	0	4	0	0	1	1	2	3	2	0	2	2	1	0	0	3	1	0
0	0	1	1	2	4	0	0	0	0	4	1	1	0	0	0	0	2	0	2	0	0	0	1	0	2	1	0	0	0	2	0	0	1	0	0	3	0	0	2	2	0	1	2	3	0	0	4	1	0
1	1	0	1	0	3	1	2	3	1	4	2	1	1	0	0	0	2	0	1	0	0	0	1	0	2	1	2	0	0	3	0	0	1	1	0	3	0	1	2	0	1	0	0	1	3	0	2	2	0
1	0	0	1	0	4	0	0	0	0	4	3	1	0	0	0	2	2	1	1	0	2	1	0	0	2	1	0	0	0	2	0	0	1	1	0	1	0	0	2	0	0	1	1	3	0	0	4	0	1
1	0	0	1	0	4	0	0	0	0	3	1	1	0	0	0	0	2	1	1	0	0	1	0	0	2	1	0	0	0	0	0	0	3	1	0	1	0	0	2	0	0	1	1	1	0	0	4	0	1
0	0	1	1	0	4	0	1	0	0	2	0	1	1	0	0	0	2	0	1	0	2	2	0	0	2	0	0	2	0	1	0	0	1	1	0	1	1	0	2	0	0	3	0	1	0	0	4	0	0
0	0	0	1	0	4	1	2	2	0	3	1	1	1	0	0	0	2	0	1	0	0	1	1	0	2	1	2	0	0	3	0	0	1	1	0	3	0	1	2	0	0	1	0	1	2	0	3	2	0
2	1	2	1	0	3	0	0	1	1	3	0	1	3	0	1	0	3	1	3	0	0	2	0	0	2	1	0	0	0	1	0	0	3	1	0	1	0	0	3	0	1	0	0	1	3	2	2	3	2
0	0	0	1	0	4	0	0	0	0	2	0	1	1	0	0	0	2	1	1	0	0	2	0	0	2	0	0	1	0	1	0	0	3	1	0	1	1	0	2	0	0	1	0	1	0	0	4	0	1
2	0	2	1	0	4	0	0	0	0	4	0	1	3	0	1	0	1	1	3	0	1	0	0	0	0	1	0	0	0	1	0	0	3	0	0	0	0	0	3	1	0	3	1	1	2	2	3	3	2
2	0	1	1	0	3	0	1	0	0	4	1	1	1	0	0	0	2	0	1	0	0	0	0	0	0	1	0	1	0	1	0	0	2	1	0	0	2	2	2	0	0	2	0	1	0	0	3	1	0
1	1	1	1	0	3	0	1	1	1	4	1	1	1	0	0	0	2	0	1	0	0	0	0	0	0	1	0	1	0	1	0	0	1	1	0	0	2	2	2	0	1	2	0	1	1	0	3	1	0
3	1	0	1	0	3	0	0	1	1	4	2	1	1	0	0	0	0	0	1	0	0	0	1	0	0	1	0	0	0	3	2	2	3	1	0	0	0	0	3	0	1	2	0	1	3	0	2	1	0
2	0	0	1	0	3	0	0	0	0	4	3	1	1	0	0	2	0	1	2	0	2	0	0	0	0	1	0	0	0	3	0	0	2	1	0	0	0	0	2	0	0	2	0	3	0	0	3	1	0
3	0	2	1	0	3	0	0	0	0	3	0	1	3	0	1	0	1	1	3	0	1	1	0	0	0	1	0	0	0	1	0	0	4	1	0	0	0	0	3	0	0	2	0	1	2	2	2	3	2
0	0	2	1	2	4	0	0	0	0	3	1	1	1	0	0	0	0	0	1	0	0	0	1	0	0	0	0	1	0	3	0	0	1	0	0	0	1	0	2	1	0	3	1	1	2	0	3	0	0
0	0	0	1	0	4	0	0	0	0	4	1	3	1	0	0	0	0	0	3	0	0	0	1	0	0	0	0	1	0	3	0	0	1	0	0	0	1	0	3	1	2	4	1	1	2	0	4	0	0
3	2	0	1	0	3	0	0	2	0	4	0	1	1	0	0	2	0	0	3	0	0	0	0	0	0	1	0	0	0	1	0	0	4	0	0	0	1	2	3	1	0	3	2	1	0	0	3	1	0
4	2	0	1	0	3	0	0	2	0	4	1	1	1	0	0	2	0	0	3	0	0	0	0	0	0	1	0	0	0	1	0	0	4	1	0	0	1	2	3	0	0	3	1	1	0	0	3	1	0
3	2	0	1	1	4	0	0	0	0	3	1	1	3	0	0	0	0	1	1	0	0	0	1	0	1	0	2	1	0	1	0	0	3	1	0	0	1	0	2	0	0	3	0	1	0	0	3	0	0
2	3	0	1	1	3	0	0	1	1	2	0	1	3	0	0	0	0	1	1	0	0	1	1	0	1	1	2	0	0	1	0	0	3	1	0	0	0	0	2	0	1	2	0	1	1	0	2	1	0
3	0	0	1	0	1	0	0	0	0	5	1	1	1	0	0	0	0	0	1	0	0	0	1	0	0	1	0	0	0	3	2	2	5	0	0	0	0	2	3	1	0	0	1	1	2	0	0	1	0
3	2	0	1	0	2	0	0	0	0	5	1	1	0	0	0	0	1	0	1	0	0	0	0	0	1	1	2	0	0	0	0	0	4	1	0	1	0	2	3	0	0	1	1	1	0	0	3	0	0
2	3	0	1	0	1	0	0	1	1	4	0	1	1	0	0	0	1	0	1	0	0	1	0	0	1	1	2	0	0	1	0	0	4	1	0	1	0	2	3	0	1	0	0	1	1	0	2	1	0
2	0	0	1	0	2	0	0	0	0	3	0	1	1	0	0	0	2	1	1	0	0	1	0	0	0	1	0	0	0	1	2	0	4	1	0	0	0	2	2	1	0	1	0	1	0	0	1	1	0
0	0	0	1	0	3	0	0	0	0	3	0	1	3	0	0	0	2	1	1	0	0	1	0	0	0	0	0	1	0	1	0	0	3	1	0	0	1	2	2	1	0	1	0	1	0	0	1	0	0
[truncated: 85 more columns]

## Sheet: Figure S10_RDKit
Entry	Substrate_1	Substrate_2	Catalyst	Solvent	Product	Yield	SlogP	SMR	LabuteASA	TPSA	AMW	ExactMW	NumLipinskiHBA	NumLipinskiHBD	NumRotatableBonds	NumHBD	NumHBA	NumAmideBonds	NumHeteroAtoms	NumHeavyAtoms	NumAtoms	NumStereocenters	NumUnspecifiedStereocenters	NumRings	NumAromaticRings	NumSaturatedRings	NumAliphaticRings	NumAromaticHeterocycles	NumSaturatedHeterocycles	NumAliphaticHeterocycles	NumAromaticCarbocycles	NumSaturatedCarbocycles	NumAliphaticCarbocycles	FractionCSP3	Chi0v	Chi1v	Chi2v	Chi3v	Chi4v	Chi1n	Chi2n	Chi3n	Chi4n	HallKierAlpha	kappa1	kappa2	kappa3	slogp_VSA1	slogp_VSA2
2	BrC1=CC=C(CC(O)=O)C=C1	C1([Se][Se]C2=CC=CC=C2)=CC=CC=C1	NC(C1=CN(CC2=CC=CC=C2)C=C(C(N)=O)C1C3=CC=CC=C3)=O	CS(C)=O	BrC1=CC=C(C[Se]C2=CC=CC=C2)C=C1	0.215354	2.0762	45.4818	72.9846	37.3	215.046	213.963	2	1	2	1	1	0	3	11	18	0	0	1	1	0	0	0	0	0	1	0	0	0.125	7.33593	3.93819	3.11266	1.79727	1.04121	3.14519	2.19698	1.26861	0.776878	-0.83	8.26833	3.52892	2.71792	0	11.0758
24	O=C(C1CCOCC1)O	C1([Se][Se]C2=CC=CC=C2)=CC=CC=C1	NC(C1=CN(CC2=CC=CC=C2)C=CC1)=O	[H]C(N(C)C)=O	C1([Se]C2=CC=CC=C2)CCOCC1	0.753973	0.4976	31.1788	53.6274	46.53	130.143	130.063	3	1	1	1	2	0	3	9	19	0	0	1	0	1	1	0	1	1	0	0	0	0.833333	5.16949	3.11025	2.22488	1.57054	0.944535	3.11025	2.22488	1.57054	0.944535	-0.57	6.54862	2.82385	1.67686	0	24.2896
31	CC(C1=CC=C2C=C(OC)C=CC2=C1)C(O)=O	C1([Se][Se]C2=CC=CC=C2)=CC=CC=C1	NC(C1=CN(CC2=CC=C(C(F)(F)F)C=C2)C=CC1)=O	[H]C(N(C)C)=O	CC(C1=CC=C2C=C(OC)C=CC2=C1)[Se]C3=CC=CC=C3	0.621643	3.0365	66.5508	99.6421	46.53	230.263	230.094	3	1	3	1	2	0	3	17	31	1	1	2	2	0	0	0	0	0	2	0	0	0.214286	9.80516	5.42087	4.03244	2.94189	1.78119	5.42087	4.03244	2.94189	1.78119	-2.03	11.4553	4.45404	2.22849	4.73686	18.1856
35	CC1=CC=C(S(N2CCC(C(O)=O)CC2)(=O)=O)C=C1	C1([Se][Se]C2=CC=CC=C2)=CC=CC=C1	NC(C1=CN(CC2=CC=CC=C2)C=C(C(N)=O)C1)=O	CC#N	CC1=CC=C(S(N2CCC([Se]C3=CC=CC=C3)CC2)(=O)=O)C=C1	0.358787	1.48032	70.2976	112.457	74.68	283.349	283.088	5	1	3	1	3	0	6	19	36	0	0	2	1	1	1	0	1	1	1	0	0	0.461538	11.5591	7.64682	6.76758	5.37479	3.67212	6.20676	4.82965	3.46193	2.20242	-1.4	14.0185	5.30321	2.95571	0	36.8884
36	CC1=CC=C(S(N2CCC(C(O)=O)CC2)(=O)=O)C=C1	C1([Se][Se]C2=CC=CC=C2)=CC=CC=C1	NC(C1=CN(CC2=CC=CC=C2)C=C(C(N)=O)C1C3=CC=CC=C3)=O	CC#N	CC1=CC=C(S(N2CCC([Se]C3=CC=CC=C3)CC2)(=O)=O)C=C1	0.0706403	1.48032	70.2976	112.457	74.68	283.349	283.088	5	1	3	1	3	0	6	19	36	0	0	2	1	1	1	0	1	1	1	0	0	0.461538	11.5591	7.64682	6.76758	5.37479	3.67212	6.20676	4.82965	3.46193	2.20242	-1.4	14.0185	5.30321	2.95571	0	36.8884
37	O=C(CCC1=CC=CC=C1)O	C1([Se][Se]C2=CC=CC=C2)=CC=CC=C1	NC(C1=CN(CC2=CC=CC=C2)C=C(C(N)=O)C1C3=CC=CC=C3)=O	CC#N	C1(CC[Se]C2=CC=CC=C2)=CC=CC=C1	0	1.7038	42.3988	65.482	37.3	150.177	150.068	2	1	3	1	1	0	2	11	21	0	0	1	1	0	0	0	0	0	1	0	0	0.222222	6.15643	3.54552	2.37934	1.47037	0.895948	3.54552	2.37934	1.47037	0.895948	-1.31	7.7932	3.76048	2.84605	0	11.0758
38	FC1(F)CCC(C(O)=O)CC1	C1([Se][Se]C2=CC=CC=C2)=CC=CC=C1	NC(C1=CN(CC2=CC=CC=C2)C=C(C(N)=O)C1)=O	CC#N	FC1(F)CCC([Se]C2=CC=CC=C2)CC1	0.184129	1.8965	34.5408	63.2099	37.3	164.151	164.065	2	1	1	1	1	0	4	11	21	0	0	1	0	1	1	0	0	0	0	1	1	0.857143	6.01717	3.61797	2.96846	2.06636	1.28709	3.61797	2.96846	2.06636	1.28709	-0.67	8.42681	2.75478	2.13307	0	16.9984
43	BrC1=CC=C(CC(O)=O)C=C1	C1([Se][Se]C2=CC=CC=C2)=CC=CC=C1	NC(C1=CN(CC2=CC=C(OC)C=C2)C=CC1)=O	CC#N	BrC1=CC=C(C[Se]C2=CC=CC=C2)C=C1	0.271746	2.0762	45.4818	72.9846	37.3	215.046	213.963	2	1	2	1	1	0	3	11	18	0	0	1	1	0	0	0	0	0	1	0	0	0.125	7.33593	3.93819	3.11266	1.79727	1.04121	3.14519	2.19698	1.26861	0.776878	-0.83	8.26833	3.52892	2.71792	0	11.0758
50	O=C(CCCC1=CNC2=C1C=CC=C2)O	C1(C[Se][Se]CC2=CC=CC=C2)=CC=CC=C1	NC(C1=CN(CC2=CC=C(OC)C=C2)C=CC1)=O	CS(C)=O	C1(CCC[Se]CC2=CC=CC=C2)=CNC3=C1C=CC=C3	0.13498	2.5752	58.8725	87.7378	53.09	203.241	203.095	3	2	4	2	1	0	3	15	28	0	0	2	2	0	0	1	0	0	1	0	0	0.25	8.36353	5.03954	3.60679	2.51168	1.76852	5.03954	3.60679	2.51168	1.76852	-1.77	9.77244	4.17088	2.18007	0	16.0598
54	CC(C1=CC=C(CC2C(CCC2)=O)C=C1)C(O)=O	C1(C[Se][Se]CC2=CC=CC=C2)=CC=CC=C1	NC(C1=CN(CC2=CC=C(OC)C=C2)C=CC1)=O	CS(C)=O	CC(C1=CC=C(CC2C(CCC2)=O)C=C1)[Se]CC3=CC=CC=C3	0.166509	2.7864	68.5448	106.827	54.37	246.306	246.126	3	1	4	1	2	0	3	18	36	2	2	2	1	1	1	0	0	0	1	1	1	0.466667	10.5562	6.4202	5.0611	3.76335	2.47319	6.4202	5.0611	3.76335	2.47319	-1.64	12.8076	5.33759	2.78076	0	16.8591
56	CC1=CC=C(S(N2CCC(C(O)=O)CC2)(=O)=O)C=C1	C1(C[Se][Se]CC2=CC=CC=C2)=CC=CC=C1	NC(C1=CN(CC2=CC=C(OC)C=C2)C=CC1)=O	[H]C(N(C)C)=O	CC1=CC=C(S(N2CCC([Se]CC3=CC=CC=C3)CC2)(=O)=O)C=C1	0.157108	1.48032	70.2976	112.457	74.68	283.349	283.088	5	1	3	1	3	0	6	19	36	0	0	2	1	1	1	0	1	1	1	0	0	0.461538	11.5591	7.64682	6.76758	5.37479	3.67212	6.20676	4.82965	3.46193	2.20242	-1.4	14.0185	5.30321	2.95571	0	36.8884
57	O=C1C2=CC(CC(O)=O)=CC=C2OCC3=CC=CC=C13	C1(C[Se][Se]CC2=CC=CC=C2)=CC=CC=C1	NC(C1=CN(CC2=CC=C(C(F)(F)F)C=C2)C=CC1)=O	[H]C(N(C)C)=O	O=C1C2=CC(C[Se]CC3=CC=CC=C3)=CC=C2OCC4=CC=CC=C14	0.277123	2.4371	71.9883	115.173	63.6	268.268	268.074	4	1	2	1	3	0	4	20	32	0	0	3	2	0	1	0	0	1	2	0	0	0.125	10.6276	6.2507	4.67597	3.28911	2.3333	6.2507	4.67597	3.28911	2.3333	-2.62	12.4157	4.81063	2.15906	4.73686	16.8591
59	O=C1C2=CC(CC(O)=O)=CC=C2OCC3=CC=CC=C13	C1(C[Se][Se]CC2=CC=CC=C2)=CC=CC=C1	NC(C1=CN(CC2=CC=CC=C2)C=C(C(N)=O)C1C3=CC=CC=C3)=O	[H]C(N(C)C)=O	O=C1C2=CC(C[Se]CC3=CC=CC=C3)=CC=C2OCC4=CC=CC=C14	0.283275	2.4371	71.9883	115.173	63.6	268.268	268.074	4	1	2	1	3	0	4	20	32	0	0	3	2	0	1	0	0	1	2	0	0	0.125	10.6276	6.2507	4.67597	3.28911	2.3333	6.2507	4.67597	3.28911	2.3333	-2.62	12.4157	4.81063	2.15906	4.73686	16.8591
71	O=C(OCC1=CC=CC=C1)[C@H](NC(OC(C)(C)C)=O)CC(O)=O	C1(C[Se][Se]CC2=CC=CC=C2)=CC=CC=C1	NC(C1=CN(CC2=CC=CC=C2)C=C(C(N)=O)C1C3=CC=CC=C3)=O	[H]C(N(C)C)=O	O=C(OCC1=CC=CC=C1)[C@H](NC(OC(C)(C)C)=O)C[Se]CC2=CC=CC=C2	0	2.0978	81.6485	134.137	101.93	323.345	323.137	7	2	6	2	5	1	7	23	44	1	0	1	1	0	0	0	0	0	1	0	0	0.4375	13.3668	7.09042	5.88999	2.57815	1.64702	7.09042	5.88999	2.57815	1.64702	-2.57	18.4789	8.16525	7.84542	5.31679	34.7813
86	CC(N(C(C1=C2C=CC=C1)=O)C2=O)C(O)=O	CC[Se][Se]CC	NC(C1=CN(CC2=CC=CC=C2)C=CC1)=O	CC#N	CC(N(C(C1=C2C=CC=C1)=O)C2=O)[Se]CC	0	0.7557	54.0398	91.2889	74.68	219.196	219.053	5	1	2	1	3	2	5	16	25	1	1	2	1	0	1	0	0	1	1	0	0	0.181818	8.50592	4.73477	3.5401	2.57017	1.67007	4.73477	3.5401	2.57017	1.67007	-2.17	10.3513	3.44496	1.28736	0	33.8319
88	O=C(CCCC1=CNC2=C1C=CC=C2)O	CC[Se][Se]CC	NC(C1=CN(CC2=CC=C(OC)C=C2)C=CC1)=O	CC#N	CC[Se]CCCC1=CNC2=C1C=CC=C2	0.0549438	2.5752	58.8725	87.7378	53.09	203.241	203.095	3	2	4	2	1	0	3	15	28	0	0	2	2	0	0	1	0	0	1	0	0	0.25	8.36353	5.03954	3.60679	2.51168	1.76852	5.03954	3.60679	2.51168	1.76852	-1.77	9.77244	4.17088	2.18007	0	16.0598
89	O=C(CCCC1=CNC2=C1C=CC=C2)O	CC[Se][Se]CC	NC(C1=CN(CC2=CC=CC=C2)C=C(C(N)=O)C1)=O	CC#N	CC[Se]CCCC1=CNC2=C1C=CC=C2	0.118482	2.5752	58.8725	87.7378	53.09	203.241	203.095	3	2	4	2	1	0	3	15	28	0	0	2	2	0	0	1	0	0	1	0	0	0.25	8.36353	5.03954	3.60679	2.51168	1.76852	5.03954	3.60679	2.51168	1.76852	-1.77	9.77244	4.17088	2.18007	0	16.0598
93	CC(C1=CC=C(CC2C(CCC2)=O)C=C1)C(O)=O	CC[Se][Se]CC	NC(C1=CN(CC2=CC=CC=C2)C=C(C(N)=O)C1)=O	CC#N	CC(C1=CC=C(CC2C(CCC2)=O)C=C1)[Se]CC	0.025762	2.7864	68.5448	106.827	54.37	246.306	246.126	3	1	4	1	2	0	3	18	36	2	2	2	1	1	1	0	0	0	1	1	1	0.466667	10.5562	6.4202	5.0611	3.76335	2.47319	6.4202	5.0611	3.76335	2.47319	-1.64	12.8076	5.33759	2.78076	0	16.8591
94	CC(N1C(C2=CC=C(Cl)C=C2)=O)=C(CC(O)=O)C3=C1C=CC(OC)=C3	CC[Se][Se]CC	NC(C1=CN(CC2=CC=CC=C2)C=C(C(N)=O)C1C3=CC=CC=C3)=O	CC#N	CC(N1C(C2=CC=C(Cl)C=C2)=O)=C(C[Se]CC)C3=C1C=CC(OC)=C3	0	3.92732	95.7473	148.948	68.53	357.793	357.077	5	1	4	1	4	0	6	25	41	0	0	3	3	0	0	1	0	0	2	0	0	0.157895	14.5016	7.9985	6.10145	4.41613	3.07299	7.62054	5.66501	4.16415	2.947	-2.79	17.0467	6.60718	3.10467	4.73686	28.6599
99	O=C(CC1=CNC2=C1C=CC=C2)O	CC[Se][Se]CC	NC(C1=CN(CC2=CC=C(C(F)(F)F)C=C2)C=CC1)=O	CS(C)=O	CC[Se]CC1=CNC2=C1C=CC=C2	0.55325	1.795	49.6385	75.0079	53.09	175.187	175.063	3	2	2	2	1	0	3	13	22	0	0	2	2	0	0	1	0	0	1	0	0	0.1	6.94932	4.03954	2.93001	2.0166	1.44079	4.03954	2.93001	2.0166	1.44079	-1.77	7.85739	2.93568	1.40216	0	16.0598
103	CC1=C(CC(O)=O)C=CC=C1	CC[Se][Se]CC	NC(C1=CN(CC2=CC=CC=C2)C=CC1)=O	[H]C(N(C)C)=O	CC1=C(C[Se]CC)C=CC=C1	0.007317	1.62212	42.5188	65.482	37.3	150.177	150.068	2	1	2	1	1	0	2	11	21	0	0	1	1	0	0	0	0	0	1	0	0	0.222222	6.37197	3.46219	2.497	1.60293	0.971355	3.46219	2.497	1.60293	0.971355	-1.31	7.7932	3.19116	2.07522	0	11.0758
105	CC1=C(CC(O)=O)C=CC=C1	CC[Se][Se]CC	NC(C1=CN(CC2=CC=CC=C2)C=C(C(N)=O)C1C3=CC=CC=C3)=O	[H]C(N(C)C)=O	CC1=C(C[Se]CC)C=CC=C1	0.002439	1.62212	42.5188	65.482	37.3	150.177	150.068	2	1	2	1	1	0	2	11	21	0	0	1	1	0	0	0	0	0	1	0	0	0.222222	6.37197	3.46219	2.497	1.60293	0.971355	3.46219	2.497	1.60293	0.971355	-1.31	7.7932	3.19116	2.07522	0	11.0758
107	CC1=C(CC(O)=O)C=CC=C1	CC[Se][Se]CC	NC(C1=CN(CC2=CC=CC=C2)C=CC1)=O	CC#N	CC1=C(C[Se]CC)C=CC=C1	0	1.62212	42.5188	65.482	37.3	150.177	150.068	2	1	2	1	1	0	2	11	21	0	0	1	1	0	0	0	0	0	1	0	0	0.222222	6.37197	3.46219	2.497	1.60293	0.971355	3.46219	2.497	1.60293	0.971355	-1.31	7.7932	3.19116	2.07522	0	11.0758
113	BrC1=CC=C(CC(O)=O)C=C1	C1([Se][Se]C2=CC=CC=C2)=CC=CC=C1	NC(C1=CN(CC2=CC=CC=C2)C=C(C(N)=O)C1)=O	CS(C)=O	BrC1=CC=C(C[Se]C2=CC=CC=C2)C=C1	0.241536	2.0762	45.4818	72.9846	37.3	215.046	213.963	2	1	2	1	1	0	3	11	18	0	0	1	1	0	0	0	0	0	1	0	0	0.125	7.33593	3.93819	3.11266	1.79727	1.04121	3.14519	2.19698	1.26861	0.776878	-0.83	8.26833	3.52892	2.71792	0	11.0758
126	CC(C1=CC=C2C=C(OC)C=CC2=C1)C(O)=O	C1([Se][Se]C2=CC=CC=C2)=CC=CC=C1	NC(C1=CN(CC2=CC=C(C(F)(F)F)C=C2)C=CC1)=O	CS(C)=O	CC(C1=CC=C2C=C(OC)C=CC2=C1)[Se]C3=CC=CC=C3	0.621643	3.0365	66.5508	99.6421	46.53	230.263	230.094	3	1	3	1	2	0	3	17	31	1	1	2	2	0	0	0	0	0	2	0	0	0.214286	9.80516	5.42087	4.03244	2.94189	1.78119	5.42087	4.03244	2.94189	1.78119	-2.03	11.4553	4.45404	2.22849	4.73686	18.1856
133	BrC1=CC=C(CC(O)=O)C=C1	C1([Se][Se]C2=CC=CC=C2)=CC=CC=C1	NC(C1=CN(CC2=CC=CC=C2)C=C(C(N)=O)C1)=O	[H]C(N(C)C)=O	BrC1=CC=C(C[Se]C2=CC=CC=C2)C=C1	0.341726	2.0762	45.4818	72.9846	37.3	215.046	213.963	2	1	2	1	1	0	3	11	18	0	0	1	1	0	0	0	0	0	1	0	0	0.125	7.33593	3.93819	3.11266	1.79727	1.04121	3.14519	2.19698	1.26861	0.776878	-0.83	8.26833	3.52892	2.71792	0	11.0758
136	O=C(C1CCOCC1)O	C1([Se][Se]C2=CC=CC=C2)=CC=CC=C1	NC(C1=CN(CC2=CC=C(OC)C=C2)C=CC1)=O	[H]C(N(C)C)=O	C1([Se]C2=CC=CC=C2)CCOCC1	0.770298	0.4976	31.1788	53.6274	46.53	130.143	130.063	3	1	1	1	2	0	3	9	19	0	0	1	0	1	1	0	1	1	0	0	0	0.833333	5.16949	3.11025	2.22488	1.57054	0.944535	3.11025	2.22488	1.57054	0.944535	-0.57	6.54862	2.82385	1.67686	0	24.2896
143	CC(N1C(C2=CC=C(Cl)C=C2)=O)=C(CC(O)=O)C3=C1C=CC(OC)=C3	C1([Se][Se]C2=CC=CC=C2)=CC=CC=C1	NC(C1=CN(CC2=CC=CC=C2)C=CC1)=O	CC#N	CC(N1C(C2=CC=C(Cl)C=C2)=O)=C(C[Se]C3=CC=CC=C3)C4=C1C=CC(OC)=C4	0.535651	3.92732	95.7473	148.948	68.53	357.793	357.077	5	1	4	1	4	0	6	25	41	0	0	3	3	0	0	1	0	0	2	0	0	0.157895	14.5016	7.9985	6.10145	4.41613	3.07299	7.62054	5.66501	4.16415	2.947	-2.79	17.0467	6.60718	3.10467	4.73686	28.6599
146	CC1=C(CC(O)=O)C=CC=C1	C1([Se][Se]C2=CC=CC=C2)=CC=CC=C1	NC(C1=CN(CC2=CC=CC=C2)C=CC1)=O	CC#N	CC1=C(C[Se]C2=CC=CC=C2)C=CC=C1	0.2063	1.62212	42.5188	65.482	37.3	150.177	150.068	2	1	2	1	1	0	2	11	21	0	0	1	1	0	0	0	0	0	1	0	0	0.222222	6.37197	3.46219	2.497	1.60293	0.971355	3.46219	2.497	1.60293	0.971355	-1.31	7.7932	3.19116	2.07522	0	11.0758
156	CC(N(C(C1=C2C=CC=C1)=O)C2=O)C(O)=O	C1(C[Se][Se]CC2=CC=CC=C2)=CC=CC=C1	NC(C1=CN(CC2=CC=CC=C2)C=C(C(N)=O)C1C3=CC=CC=C3)=O	CS(C)=O	CC(N(C(C1=C2C=CC=C1)=O)C2=O)[Se]CC3=CC=CC=C3	0.161164	0.7557	54.0398	91.2889	74.68	219.196	219.053	5	1	2	1	3	2	5	16	25	1	1	2	1	0	1	0	0	1	1	0	0	0.181818	8.50592	4.73477	3.5401	2.57017	1.67007	4.73477	3.5401	2.57017	1.67007	-2.17	10.3513	3.44496	1.28736	0	33.8319
163	CC(N(C(C1=C2C=CC=C1)=O)C2=O)C(O)=O	C1(C[Se][Se]CC2=CC=CC=C2)=CC=CC=C1	NC(C1=CN(CC2=CC=CC=C2)C=C(C(N)=O)C1)=O	[H]C(N(C)C)=O	CC(N(C(C1=C2C=CC=C1)=O)C2=O)[Se]CC3=CC=CC=C3	0.098032	0.7557	54.0398	91.2889	74.68	219.196	219.053	5	1	2	1	3	2	5	16	25	1	1	2	1	0	1	0	0	1	1	0	0	0.181818	8.50592	4.73477	3.5401	2.57017	1.67007	4.73477	3.5401	2.57017	1.67007	-2.17	10.3513	3.44496	1.28736	0	33.8319
164	O=C(CCCC1=CNC2=C1C=CC=C2)O	C1(C[Se][Se]CC2=CC=CC=C2)=CC=CC=C1	NC(C1=CN(CC2=CC=CC=C2)C=C(C(N)=O)C1C3=CC=CC=C3)=O	[H]C(N(C)C)=O	C1(CCC[Se]CC2=CC=CC=C2)=CNC3=C1C=CC=C3	0.0239199	2.5752	58.8725	87.7378	53.09	203.241	203.095	3	2	4	2	1	0	3	15	28	0	0	2	2	0	0	1	0	0	1	0	0	0.25	8.36353	5.03954	3.60679	2.51168	1.76852	5.03954	3.60679	2.51168	1.76852	-1.77	9.77244	4.17088	2.18007	0	16.0598
165	CC1=CC=C(S(N2CCC(C(O)=O)CC2)(=O)=O)C=C1	C1(C[Se][Se]CC2=CC=CC=C2)=CC=CC=C1	NC(C1=CN(CC2=CC=CC=C2)C=CC1)=O	[H]C(N(C)C)=O	CC1=CC=C(S(N2CCC([Se]CC3=CC=CC=C3)CC2)(=O)=O)C=C1	0.11873	1.48032	70.2976	112.457	74.68	283.349	283.088	5	1	3	1	3	0	6	19	36	0	0	2	1	1	1	0	1	1	1	0	0	0.461538	11.5591	7.64682	6.76758	5.37479	3.67212	6.20676	4.82965	3.46193	2.20242	-1.4	14.0185	5.30321	2.95571	0	36.8884
166	CC1=CC=C(S(N2CCC(C(O)=O)CC2)(=O)=O)C=C1	C1(C[Se][Se]CC2=CC=CC=C2)=CC=CC=C1	NC(C1=CN(CC2=CC=CC=C2)C=C(C(N)=O)C1)=O	[H]C(N(C)C)=O	CC1=CC=C(S(N2CCC([Se]CC3=CC=CC=C3)CC2)(=O)=O)C=C1	0.0421288	1.48032	70.2976	112.457	74.68	283.349	283.088	5	1	3	1	3	0	6	19	36	0	0	2	1	1	1	0	1	1	1	0	0	0.461538	11.5591	7.64682	6.76758	5.37479	3.67212	6.20676	4.82965	3.46193	2.20242	-1.4	14.0185	5.30321	2.95571	0	36.8884
169	CC(C1=CC=C(CC2C(CCC2)=O)C=C1)C(O)=O	C1(C[Se][Se]CC2=CC=CC=C2)=CC=CC=C1	NC(C1=CN(CC2=CC=CC=C2)C=C(C(N)=O)C1)=O	CC#N	CC(C1=CC=C(CC2C(CCC2)=O)C=C1)[Se]CC3=CC=CC=C3	0.012167	2.7864	68.5448	106.827	54.37	246.306	246.126	3	1	4	1	2	0	3	18	36	2	2	2	1	1	1	0	0	0	1	1	1	0.466667	10.5562	6.4202	5.0611	3.76335	2.47319	6.4202	5.0611	3.76335	2.47319	-1.64	12.8076	5.33759	2.78076	0	16.8591
171	CC(N1C(C2=CC=C(Cl)C=C2)=O)=C(CC(O)=O)C3=C1C=CC(OC)=C3	C1(C[Se][Se]CC2=CC=CC=C2)=CC=CC=C1	NC(C1=CN(CC2=CC=CC=C2)C=C(C(N)=O)C1)=O	CC#N	CC(N1C(C2=CC=C(Cl)C=C2)=O)=C(C[Se]CC3=CC=CC=C3)C4=C1C=CC(OC)=C4	0	3.92732	95.7473	148.948	68.53	357.793	357.077	5	1	4	1	4	0	6	25	41	0	0	3	3	0	0	1	0	0	2	0	0	0.157895	14.5016	7.9985	6.10145	4.41613	3.07299	7.62054	5.66501	4.16415	2.947	-2.79	17.0467	6.60718	3.10467	4.73686	28.6599
174	O=C(OCC1=CC=CC=C1)[C@H](NC(OC(C)(C)C)=O)CC(O)=O	C1(C[Se][Se]CC2=CC=CC=C2)=CC=CC=C1	NC(C1=CN(CC2=CC=CC=C2)C=CC1)=O	CS(C)=O	O=C(OCC1=CC=CC=C1)[C@H](NC(OC(C)(C)C)=O)C[Se]CC2=CC=CC=C2	0.044813	2.0978	81.6485	134.137	101.93	323.345	323.137	7	2	6	2	5	1	7	23	44	1	0	1	1	0	0	0	0	0	1	0	0	0.4375	13.3668	7.09042	5.88999	2.57815	1.64702	7.09042	5.88999	2.57815	1.64702	-2.57	18.4789	8.16525	7.84542	5.31679	34.7813
176	O=C(C1CCC1)O	C1(C[Se][Se]CC2=CC=CC=C2)=CC=CC=C1	NC(C1=CN(CC2=CC=C(C(F)(F)F)C=C2)C=CC1)=O	CS(C)=O	C1([Se]CC2=CC=CC=C2)CCC1	0.0475206	0.8711	24.9768	42.1489	37.3	100.117	100.052	2	1	1	1	1	0	2	7	15	0	0	1	0	1	1	0	0	0	0	1	1	0.8	4.05413	2.5329	1.96606	1.45441	0.655199	2.5329	1.96606	1.45441	0.655199	-0.53	4.62456	1.52348	0.734423	0	11.0758
182	O=C(N1CCC(C(O)=O)CC1)OCC2=CC=CC=C2	C1(C[Se][Se]CC2=CC=CC=C2)=CC=CC=C1	NC(C1=CN(CC2=CC=CC=C2)C=C(C(N)=O)C1C3=CC=CC=C3)=O	[H]C(N(C)C)=O	O=C(N1CCC([Se]CC2=CC=CC=C2)CC1)OCC3=CC=CC=C3	0.0159537	2.1198	68.5598	111.336	66.84	263.293	263.116	5	1	3	1	3	1	5	19	36	0	0	2	1	1	1	0	1	1	1	0	0	0.428571	10.6188	6.35013	4.63974	3.30753	2.11961	6.35013	4.63974	3.30753	2.11961	-2.04	13.393	6.22189	3.70857	0	35.1585
185	O=C(N1CCC(C(O)=O)CC1)OCC2=CC=CC=C2	C1(C[Se][Se]CC2=CC=CC=C2)=CC=CC=C1	NC(C1=CN(CC2=CC=C(OC)C=C2)C=CC1)=O	CC#N	O=C(N1CCC([Se]CC2=CC=CC=C2)CC1)OCC3=CC=CC=C3	0.0251895	2.1198	68.5598	111.336	66.84	263.293	263.116	5	1	3	1	3	1	5	19	36	0	0	2	1	1	1	0	1	1	1	0	0	0.428571	10.6188	6.35013	4.63974	3.30753	2.11961	6.35013	4.63974	3.30753	2.11961	-2.04	13.393	6.22189	3.70857	0	35.1585
188	O=C(OCC1=CC=CC=C1)[C@H](NC(OC(C)(C)C)=O)CC(O)=O	C1(C[Se][Se]CC2=CC=CC=C2)=CC=CC=C1	NC(C1=CN(CC2=CC=CC=C2)C=C(C(N)=O)C1)=O	CC#N	O=C(OCC1=CC=CC=C1)[C@H](NC(OC(C)(C)C)=O)C[Se]CC2=CC=CC=C2	0	2.0978	81.6485	134.137	101.93	323.345	323.137	7	2	6	2	5	1	7	23	44	1	0	1	1	0	0	0	0	0	1	0	0	0.4375	13.3668	7.09042	5.88999	2.57815	1.64702	7.09042	5.88999	2.57815	1.64702	-2.57	18.4789	8.16525	7.84542	5.31679	34.7813
201	CC1=CC=C(CC(O)=O)C=C1	CC[Se][Se]CC	NC(C1=CN(CC2=CC=CC=C2)C=CC1)=O	CS(C)=O	CC1=CC=C(C[Se]CC)C=C1	0.118274	1.62212	42.5188	65.482	37.3	150.177	150.068	2	1	2	1	1	0	2	11	21	0	0	1	1	0	0	0	0	0	1	0	0	0.222222	6.37197	3.4562	2.55611	1.47595	0.880551	3.4562	2.55611	1.47595	0.880551	-1.31	7.7932	3.19116	2.41518	0	11.0758
203	COC1=CC=C(CC(O)=O)C=C1	CC[Se][Se]CC	NC(C1=CN(CC2=CC=C(OC)C=C2)C=CC1)=O	CS(C)=O	COC1=CC=C(C[Se]CC)C=C1	0.318536	1.3223	44.3338	70.5955	46.53	166.176	166.063	3	1	3	1	2	0	3	12	22	0	0	1	1	0	0	0	0	0	1	0	0	0.222222	6.78022	3.56858	2.41859	1.5144	0.918008	3.56858	2.41859	1.5144	0.918008	-1.51	8.58533	3.75887	2.26848	4.73686	18.1856
208	COC1=CC=C(CC(O)=O)C=C1	CC[Se][Se]CC	NC(C1=CN(CC2=CC=C(C(F)(F)F)C=C2)C=CC1)=O	[H]C(N(C)C)=O	COC1=CC=C(C[Se]CC)C=C1	0.069056	1.3223	44.3338	70.5955	46.53	166.176	166.063	3	1	3	1	2	0	3	12	22	0	0	1	1	0	0	0	0	0	1	0	0	0.222222	6.78022	3.56858	2.41859	1.5144	0.918008	3.56858	2.41859	1.5144	0.918008	-1.51	8.58533	3.75887	2.26848	4.73686	18.1856
251	CC(C1=CC=C(CC2C(CCC2)=O)C=C1)C(O)=O	C1(C[Se][Se]CC2=CC=CC=C2)=CC=CC=C1	NC(C1=CN(CC2=CC=CC=C2)C=CC1)=O	CS(C)=O	CC(C1=CC=C(CC2C(CCC2)=O)C=C1)[Se]CC3=CC=CC=C3	0.11	2.7864	68.5448	106.827	54.37	246.306	246.126	3	1	4	1	2	0	3	18	36	2	2	2	1	1	1	0	0	0	1	1	1	0.466667	10.5562	6.4202	5.0611	3.76335	2.47319	6.4202	5.0611	3.76335	2.47319	-1.64	12.8076	5.33759	2.78076	0	16.8591
252	CC(N1C(C2=CC=C(Cl)C=C2)=O)=C(CC(O)=O)C3=C1C=CC(OC)=C3	C1(C[Se][Se]CC2=CC=CC=C2)=CC=CC=C1	NC(C1=CN(CC2=CC=CC=C2)C=C(C(N)=O)C1)=O	CS(C)=O	CC(N1C(C2=CC=C(Cl)C=C2)=O)=C(C[Se]CC3=CC=CC=C3)C4=C1C=CC(OC)=C4	0	3.92732	95.7473	148.948	68.53	357.793	357.077	5	1	4	1	4	0	6	25	41	0	0	3	3	0	0	1	0	0	2	0	0	0.157895	14.5016	7.9985	6.10145	4.41613	3.07299	7.62054	5.66501	4.16415	2.947	-2.79	17.0467	6.60718	3.10467	4.73686	28.6599
254	O=C(CCCC1=CNC2=C1C=CC=C2)O	C1(C[Se][Se]CC2=CC=CC=C2)=CC=CC=C1	NC(C1=CN(CC2=CC=CC=C2)C=CC1)=O	[H]C(N(C)C)=O	C1(CCC[Se]CC2=CC=CC=C2)=CNC3=C1C=CC=C3	0.0594334	2.5752	58.8725	87.7378	53.09	203.241	203.095	3	2	4	2	1	0	3	15	28	0	0	2	2	0	0	1	0	0	1	0	0	0.25	8.36353	5.03954	3.60679	2.51168	1.76852	5.03954	3.60679	2.51168	1.76852	-1.77	9.77244	4.17088	2.18007	0	16.0598
259	O=C(CCCC1=CNC2=C1C=CC=C2)O	C1(C[Se][Se]CC2=CC=CC=C2)=CC=CC=C1	NC(C1=CN(CC2=CC=CC=C2)C=CC1)=O	CC#N	C1(CCC[Se]CC2=CC=CC=C2)=CNC3=C1C=CC=C3	0.0272609	2.5752	58.8725	87.7378	53.09	203.241	203.095	3	2	4	2	1	0	3	15	28	0	0	2	2	0	0	1	0	0	1	0	0	0.25	8.36353	5.03954	3.60679	2.51168	1.76852	5.03954	3.60679	2.51168	1.76852	-1.77	9.77244	4.17088	2.18007	0	16.0598
264	O=C1C2=CC(CC(O)=O)=CC=C2OCC3=CC=CC=C13	C1(C[Se][Se]CC2=CC=CC=C2)=CC=CC=C1	NC(C1=CN(CC2=CC=CC=C2)C=C(C(N)=O)C1C3=CC=CC=C3)=O	CC#N	O=C1C2=CC(C[Se]CC3=CC=CC=C3)=CC=C2OCC4=CC=CC=C14	0.322833	2.4371	71.9883	115.173	63.6	268.268	268.074	4	1	2	1	3	0	4	20	32	0	0	3	2	0	1	0	0	1	2	0	0	0.125	10.6276	6.2507	4.67597	3.28911	2.3333	6.2507	4.67597	3.28911	2.3333	-2.62	12.4157	4.81063	2.15906	4.73686	16.8591
272	O=C(C1CCCCC1)O	C1(C[Se][Se]CC2=CC=CC=C2)=CC=CC=C1	NC(C1=CN(CC2=CC=C(C(F)(F)F)C=C2)C=CC1)=O	[H]C(N(C)C)=O	C1([Se]CC2=CC=CC=C2)CCCCC1	0.008204	1.6513	34.2108	54.8788	37.3	128.171	128.084	2	1	1	1	1	0	2	9	21	0	0	1	0	1	1	0	0	0	0	1	1	0.857143	5.46835	3.5329	2.67317	1.95441	1.34954	3.5329	2.67317	1.95441	1.34954	-0.53	6.58806	2.85257	1.6989	0	11.0758
273	O=C(C1CCCCC1)O	C1(C[Se][Se]CC2=CC=CC=C2)=CC=CC=C1	NC(C1=CN(CC2=CC=CC=C2)C=C(C(N)=O)C1)=O	[H]C(N(C)C)=O	C1([Se]CC2=CC=CC=C2)CCCCC1	0.0012712	1.6513	34.2108	54.8788	37.3	128.171	128.084	2	1	1	1	1	0	2	9	21	0	0	1	0	1	1	0	0	0	0	1	1	0.857143	5.46835	3.5329	2.67317	1.95441	1.34954	3.5329	2.67317	1.95441	1.34954	-0.53	6.58806	2.85257	1.6989	0	11.0758
277	O=C(C1CCC1)O	C1(C[Se][Se]CC2=CC=CC=C2)=CC=CC=C1	NC(C1=CN(CC2=CC=CC=C2)C=C(C(N)=O)C1)=O	[H]C(N(C)C)=O	C1([Se]CC2=CC=CC=C2)CCC1	0.00056818	0.8711	24.9768	42.1489	37.3	100.117	100.052	2	1	1	1	1	0	2	7	15	0	0	1	0	1	1	0	0	0	0	1	1	0.8	4.05413	2.5329	1.96606	1.45441	0.655199	2.5329	1.96606	1.45441	0.655199	-0.53	4.62456	1.52348	0.734423	0	11.0758
285	CC(C1=CC=C2C=C(OC)C=CC2=C1)C(O)=O	C1(C[Se][Se]CC2=CC=CC=C2)=CC=CC=C1	NC(C1=CN(CC2=CC=CC=C2)C=C(C(N)=O)C1C3=CC=CC=C3)=O	CC#N	CC(C1=CC=C2C=C(OC)C=CC2=C1)[Se]CC3=CC=CC=C3	0	3.0365	66.5508	99.6421	46.53	230.263	230.094	3	1	3	1	2	0	3	17	31	1	1	2	2	0	0	0	0	0	2	0	0	0.214286	9.80516	5.42087	4.03244	2.94189	1.78119	5.42087	4.03244	2.94189	1.78119	-2.03	11.4553	4.45404	2.22849	4.73686	18.1856
287	CC(N(C(C1=C2C=CC=C1)=O)C2=O)C(O)=O	CC[Se][Se]CC	NC(C1=CN(CC2=CC=CC=C2)C=C(C(N)=O)C1C3=CC=CC=C3)=O	CS(C)=O	CC(N(C(C1=C2C=CC=C1)=O)C2=O)[Se]CC	0	0.7557	54.0398	91.2889	74.68	219.196	219.053	5	1	2	1	3	2	5	16	25	1	1	2	1	0	1	0	0	1	1	0	0	0.181818	8.50592	4.73477	3.5401	2.57017	1.67007	4.73477	3.5401	2.57017	1.67007	-2.17	10.3513	3.44496	1.28736	0	33.8319
292	O=C(CCCC1=CNC2=C1C=CC=C2)O	CC[Se][Se]CC	NC(C1=CN(CC2=CC=C(C(F)(F)F)C=C2)C=CC1)=O	[H]C(N(C)C)=O	CC[Se]CCCC1=CNC2=C1C=CC=C2	0.151109	2.5752	58.8725	87.7378	53.09	203.241	203.095	3	2	4	2	1	0	3	15	28	0	0	2	2	0	0	1	0	0	1	0	0	0.25	8.36353	5.03954	3.60679	2.51168	1.76852	5.03954	3.60679	2.51168	1.76852	-1.77	9.77244	4.17088	2.18007	0	16.0598
294	CC1=CC=C(S(N2CCC(C(O)=O)CC2)(=O)=O)C=C1	CC[Se][Se]CC	NC(C1=CN(CC2=CC=C(C(F)(F)F)C=C2)C=CC1)=O	[H]C(N(C)C)=O	CC1=CC=C(S(N2CCC([Se]CC)CC2)(=O)=O)C=C1	0	1.48032	70.2976	112.457	74.68	283.349	283.088	5	1	3	1	3	0	6	19	36	0	0	2	1	1	1	0	1	1	1	0	0	0.461538	11.5591	7.64682	6.76758	5.37479	3.67212	6.20676	4.82965	3.46193	2.20242	-1.4	14.0185	5.30321	2.95571	0	36.8884
295	O=C1C2=CC(CC(O)=O)=CC=C2OCC3=CC=CC=C13	CC[Se][Se]CC	NC(C1=CN(CC2=CC=C(C(F)(F)F)C=C2)C=CC1)=O	[H]C(N(C)C)=O	O=C1C2=CC(C[Se]CC)=CC=C2OCC3=CC=CC=C13	0	2.4371	71.9883	115.173	63.6	268.268	268.074	4	1	2	1	3	0	4	20	32	0	0	3	2	0	1	0	0	1	2	0	0	0.125	10.6276	6.2507	4.67597	3.28911	2.3333	6.2507	4.67597	3.28911	2.3333	-2.62	12.4157	4.81063	2.15906	4.73686	16.8591
300	O=C(CCCC1=CNC2=C1C=CC=C2)O	CC[Se][Se]CC	NC(C1=CN(CC2=CC=C(C(F)(F)F)C=C2)C=CC1)=O	CC#N	CC[Se]CCCC1=CNC2=C1C=CC=C2	0.0265951	2.5752	58.8725	87.7378	53.09	203.241	203.095	3	2	4	2	1	0	3	15	28	0	0	2	2	0	0	1	0	0	1	0	0	0.25	8.36353	5.03954	3.60679	2.51168	1.76852	5.03954	3.60679	2.51168	1.76852	-1.77	9.77244	4.17088	2.18007	0	16.0598
305	BrC1=CC=C(CC(O)=O)C=C1	CC[Se][Se]CC	NC(C1=CN(CC2=CC=C(C(F)(F)F)C=C2)C=CC1)=O	CS(C)=O	BrC1=CC=C(C[Se]CC)C=C1	0.00769	2.0762	45.4818	72.9846	37.3	215.046	213.963	2	1	2	1	1	0	3	11	18	0	0	1	1	0	0	0	0	0	1	0	0	0.125	7.33593	3.93819	3.11266	1.79727	1.04121	3.14519	2.19698	1.26861	0.776878	-0.83	8.26833	3.52892	2.71792	0	11.0758
306	COC1=CC=C(CC(O)=O)C=C1	CC[Se][Se]CC	NC(C1=CN(CC2=CC=CC=C2)C=C(C(N)=O)C1)=O	CS(C)=O	COC1=CC=C(C[Se]CC)C=C1	0.183459	1.3223	44.3338	70.5955	46.53	166.176	166.063	3	1	3	1	2	0	3	12	22	0	0	1	1	0	0	0	0	0	1	0	0	0.222222	6.78022	3.56858	2.41859	1.5144	0.918008	3.56858	2.41859	1.5144	0.918008	-1.51	8.58533	3.75887	2.26848	4.73686	18.1856
314	CC1=CC=C(CC(O)=O)C=C1	CC[Se][Se]CC	NC(C1=CN(CC2=CC=C(C(F)(F)F)C=C2)C=CC1)=O	CC#N	CC1=CC=C(C[Se]CC)C=C1	0	1.62212	42.5188	65.482	37.3	150.177	150.068	2	1	2	1	1	0	2	11	21	0	0	1	1	0	0	0	0	0	1	0	0	0.222222	6.37197	3.4562	2.55611	1.47595	0.880551	3.4562	2.55611	1.47595	0.880551	-1.31	7.7932	3.19116	2.41518	0	11.0758
324	O=C(CCC1=CC=CC=C1)O	C1([Se][Se]C2=CC=CC=C2)=CC=CC=C1	NC(C1=CN(CC2=CC=CC=C2)C=C(C(N)=O)C1)=O	CS(C)=O	C1(CC[Se]C2=CC=CC=C2)=CC=CC=C1	0.909493	1.7038	42.3988	65.482	37.3	150.177	150.068	2	1	3	1	1	0	2	11	21	0	0	1	1	0	0	0	0	0	1	0	0	0.222222	6.15643	3.54552	2.37934	1.47037	0.895948	3.54552	2.37934	1.47037	0.895948	-1.31	7.7932	3.76048	2.84605	0	11.0758
325	FC1(F)CCC(C(O)=O)CC1	C1([Se][Se]C2=CC=CC=C2)=CC=CC=C1	NC(C1=CN(CC2=CC=CC=C2)C=C(C(N)=O)C1)=O	CS(C)=O	FC1(F)CCC([Se]C2=CC=CC=C2)CC1	0.25797	1.8965	34.5408	63.2099	37.3	164.151	164.065	2	1	1	1	1	0	4	11	21	0	0	1	0	1	1	0	0	0	0	1	1	0.857143	6.01717	3.61797	2.96846	2.06636	1.28709	3.61797	2.96846	2.06636	1.28709	-0.67	8.42681	2.75478	2.13307	0	16.9984
335	CC(C1=CC=C(CC2C(CCC2)=O)C=C1)C(O)=O	C1([Se][Se]C2=CC=CC=C2)=CC=CC=C1	NC(C1=CN(CC2=CC=C(OC)C=C2)C=CC1)=O	[H]C(N(C)C)=O	CC(C1=CC=C(CC2C(CCC2)=O)C=C1)[Se]C3=CC=CC=C3	0.523041	2.7864	68.5448	106.827	54.37	246.306	246.126	3	1	4	1	2	0	3	18	36	2	2	2	1	1	1	0	0	0	1	1	1	0.466667	10.5562	6.4202	5.0611	3.76335	2.47319	6.4202	5.0611	3.76335	2.47319	-1.64	12.8076	5.33759	2.78076	0	16.8591
349	FC1(F)CCC(C(O)=O)CC1	C1([Se][Se]C2=CC=CC=C2)=CC=CC=C1	NC(C1=CN(CC2=CC=C(OC)C=C2)C=CC1)=O	CC#N	FC1(F)CCC([Se]C2=CC=CC=C2)CC1	0.147972	1.8965	34.5408	63.2099	37.3	164.151	164.065	2	1	1	1	1	0	4	11	21	0	0	1	0	1	1	0	0	0	0	1	1	0.857143	6.01717	3.61797	2.96846	2.06636	1.28709	3.61797	2.96846	2.06636	1.28709	-0.67	8.42681	2.75478	2.13307	0	16.9984
350	O=C1C2=CC(CC(O)=O)=CC=C2OCC3=CC=CC=C13	C1([Se][Se]C2=CC=CC=C2)=CC=CC=C1	NC(C1=CN(CC2=CC=C(C(F)(F)F)C=C2)C=CC1)=O	CC#N	O=C1C2=CC(C[Se]C3=CC=CC=C3)=CC=C2OCC4=CC=CC=C14	0.591001	2.4371	71.9883	115.173	63.6	268.268	268.074	4	1	2	1	3	0	4	20	32	0	0	3	2	0	1	0	0	1	2	0	0	0.125	10.6276	6.2507	4.67597	3.28911	2.3333	6.2507	4.67597	3.28911	2.3333	-2.62	12.4157	4.81063	2.15906	4.73686	16.8591
353	CC1=CC=C(CC(O)=O)C=C1	C1([Se][Se]C2=CC=CC=C2)=CC=CC=C1	NC(C1=CN(CC2=CC=CC=C2)C=C(C(N)=O)C1)=O	CC#N	CC1=CC=C(C[Se]C2=CC=CC=C2)C=C1	0.157975	1.62212	42.5188	65.482	37.3	150.177	150.068	2	1	2	1	1	0	2	11	21	0	0	1	1	0	0	0	0	0	1	0	0	0.222222	6.37197	3.4562	2.55611	1.47595	0.880551	3.4562	2.55611	1.47595	0.880551	-1.31	7.7932	3.19116	2.41518	0	11.0758
355	CC1=C(CC(O)=O)C=CC=C1	C1([Se][Se]C2=CC=CC=C2)=CC=CC=C1	NC(C1=CN(CC2=CC=C(C(F)(F)F)C=C2)C=CC1)=O	CC#N	CC1=C(C[Se]C2=CC=CC=C2)C=CC=C1	0.243729	1.62212	42.5188	65.482	37.3	150.177	150.068	2	1	2	1	1	0	2	11	21	0	0	1	1	0	0	0	0	0	1	0	0	0.222222	6.37197	3.46219	2.497	1.60293	0.971355	3.46219	2.497	1.60293	0.971355	-1.31	7.7932	3.19116	2.07522	0	11.0758
360	O=C(C1(C2=CC=CC=C2)CC1)O	C1([Se][Se]C2=CC=CC=C2)=CC=CC=C1	NC(C1=CN(CC2=CC=CC=C2)C=C(C(N)=O)C1C3=CC=CC=C3)=O	CC#N	C1(C2([Se]C3=CC=CC=C3)CC2)=CC=CC=C1	0	1.8028	44.9898	70.8411	37.3	162.188	162.068	2	1	2	1	1	0	2	12	22	0	0	2	1	1	1	0	0	0	1	1	1	0.3	6.65643	4.04552	3.25328	2.48576	1.5082	4.04552	3.25328	2.48576	1.5082	-1.31	7.34508	2.33834	0.915677	0	11.0758
375	O=C(C1CCCCC1)O	C1(C[Se][Se]CC2=CC=CC=C2)=CC=CC=C1	NC(C1=CN(CC2=CC=CC=C2)C=C(C(N)=O)C1C3=CC=CC=C3)=O	CS(C)=O	C1([Se]CC2=CC=CC=C2)CCCCC1	-0.0017	1.6513	34.2108	54.8788	37.3	128.171	128.084	2	1	1	1	1	0	2	9	21	0	0	1	0	1	1	0	0	0	0	1	1	0.857143	5.46835	3.5329	2.67317	1.95441	1.34954	3.5329	2.67317	1.95441	1.34954	-0.53	6.58806	2.85257	1.6989	0	11.0758
377	O=C(C1CCC1)O	C1(C[Se][Se]CC2=CC=CC=C2)=CC=CC=C1	NC(C1=CN(CC2=CC=C(OC)C=C2)C=CC1)=O	CS(C)=O	C1([Se]CC2=CC=CC=C2)CCC1	0.074645	0.8711	24.9768	42.1489	37.3	100.117	100.052	2	1	1	1	1	0	2	7	15	0	0	1	0	1	1	0	0	0	0	1	1	0.8	4.05413	2.5329	1.96606	1.45441	0.655199	2.5329	1.96606	1.45441	0.655199	-0.53	4.62456	1.52348	0.734423	0	11.0758
378	O=C(C1CCC1)O	C1(C[Se][Se]CC2=CC=CC=C2)=CC=CC=C1	NC(C1=CN(CC2=CC=CC=C2)C=C(C(N)=O)C1C3=CC=CC=C3)=O	CS(C)=O	C1([Se]CC2=CC=CC=C2)CCC1	0.0092274	0.8711	24.9768	42.1489	37.3	100.117	100.052	2	1	1	1	1	0	2	7	15	0	0	1	0	1	1	0	0	0	0	1	1	0.8	4.05413	2.5329	1.96606	1.45441	0.655199	2.5329	1.96606	1.45441	0.655199	-0.53	4.62456	1.52348	0.734423	0	11.0758
379	CC(C1=CC=C2C=C(OC)C=CC2=C1)C(O)=O	C1(C[Se][Se]CC2=CC=CC=C2)=CC=CC=C1	NC(C1=CN(CC2=CC=C(C(F)(F)F)C=C2)C=CC1)=O	CS(C)=O	CC(C1=CC=C2C=C(OC)C=CC2=C1)[Se]CC3=CC=CC=C3	0.0324166	3.0365	66.5508	99.6421	46.53	230.263	230.094	3	1	3	1	2	0	3	17	31	1	1	2	2	0	0	0	0	0	2	0	0	0.214286	9.80516	5.42087	4.03244	2.94189	1.78119	5.42087	4.03244	2.94189	1.78119	-2.03	11.4553	4.45404	2.22849	4.73686	18.1856
380	CC(C1=CC=C2C=C(OC)C=CC2=C1)C(O)=O	C1(C[Se][Se]CC2=CC=CC=C2)=CC=CC=C1	NC(C1=CN(CC2=CC=CC=C2)C=C(C(N)=O)C1C3=CC=CC=C3)=O	CS(C)=O	CC(C1=CC=C2C=C(OC)C=CC2=C1)[Se]CC3=CC=CC=C3	0	3.0365	66.5508	99.6421	46.53	230.263	230.094	3	1	3	1	2	0	3	17	31	1	1	2	2	0	0	0	0	0	2	0	0	0.214286	9.80516	5.42087	4.03244	2.94189	1.78119	5.42087	4.03244	2.94189	1.78119	-2.03	11.4553	4.45404	2.22849	4.73686	18.1856
383	O=C(N1CCC(C(O)=O)CC1)OCC2=CC=CC=C2	C1(C[Se][Se]CC2=CC=CC=C2)=CC=CC=C1	NC(C1=CN(CC2=CC=CC=C2)C=CC1)=O	CC#N	O=C(N1CCC([Se]CC2=CC=CC=C2)CC1)OCC3=CC=CC=C3	0.0245298	2.1198	68.5598	111.336	66.84	263.293	263.116	5	1	3	1	3	1	5	19	36	0	0	2	1	1	1	0	1	1	1	0	0	0.428571	10.6188	6.35013	4.63974	3.30753	2.11961	6.35013	4.63974	3.30753	2.11961	-2.04	13.393	6.22189	3.70857	0	35.1585
385	CC(N(C(C1=C2C=CC=C1)=O)C2=O)C(O)=O	CC[Se][Se]CC	NC(C1=CN(CC2=CC=C(C(F)(F)F)C=C2)C=CC1)=O	CS(C)=O	CC(N(C(C1=C2C=CC=C1)=O)C2=O)[Se]CC	0	0.7557	54.0398	91.2889	74.68	219.196	219.053	5	1	2	1	3	2	5	16	25	1	1	2	1	0	1	0	0	1	1	0	0	0.181818	8.50592	4.73477	3.5401	2.57017	1.67007	4.73477	3.5401	2.57017	1.67007	-2.17	10.3513	3.44496	1.28736	0	33.8319
386	O=C(CCCC1=CNC2=C1C=CC=C2)O	CC[Se][Se]CC	NC(C1=CN(CC2=CC=C(C(F)(F)F)C=C2)C=CC1)=O	CS(C)=O	CC[Se]CCCC1=CNC2=C1C=CC=C2	0.586575	2.5752	58.8725	87.7378	53.09	203.241	203.095	3	2	4	2	1	0	3	15	28	0	0	2	2	0	0	1	0	0	1	0	0	0.25	8.36353	5.03954	3.60679	2.51168	1.76852	5.03954	3.60679	2.51168	1.76852	-1.77	9.77244	4.17088	2.18007	0	16.0598
390	O=C1C2=CC(CC(O)=O)=CC=C2OCC3=CC=CC=C13	CC[Se][Se]CC	NC(C1=CN(CC2=CC=C(OC)C=C2)C=CC1)=O	CS(C)=O	O=C1C2=CC(C[Se]CC)=CC=C2OCC3=CC=CC=C13	0.0024844	2.4371	71.9883	115.173	63.6	268.268	268.074	4	1	2	1	3	0	4	20	32	0	0	3	2	0	1	0	0	1	2	0	0	0.125	10.6276	6.2507	4.67597	3.28911	2.3333	6.2507	4.67597	3.28911	2.3333	-2.62	12.4157	4.81063	2.15906	4.73686	16.8591
398	CC(N1C(C2=CC=C(Cl)C=C2)=O)=C(CC(O)=O)C3=C1C=CC(OC)=C3	CC[Se][Se]CC	NC(C1=CN(CC2=CC=CC=C2)C=C(C(N)=O)C1)=O	[H]C(N(C)C)=O	CC(N1C(C2=CC=C(Cl)C=C2)=O)=C(C[Se]CC)C3=C1C=CC(OC)=C3	0.0863474	3.92732	95.7473	148.948	68.53	357.793	357.077	5	1	4	1	4	0	6	25	41	0	0	3	3	0	0	1	0	0	2	0	0	0.157895	14.5016	7.9985	6.10145	4.41613	3.07299	7.62054	5.66501	4.16415	2.947	-2.79	17.0467	6.60718	3.10467	4.73686	28.6599
399	CC1=CC=C(S(N2CCC(C(O)=O)CC2)(=O)=O)C=C1	CC[Se][Se]CC	NC(C1=CN(CC2=CC=CC=C2)C=C(C(N)=O)C1C3=CC=CC=C3)=O	CC#N	CC1=CC=C(S(N2CCC([Se]CC)CC2)(=O)=O)C=C1	0	1.48032	70.2976	112.457	74.68	283.349	283.088	5	1	3	1	3	0	6	19	36	0	0	2	1	1	1	0	1	1	1	0	0	0.461538	11.5591	7.64682	6.76758	5.37479	3.67212	6.20676	4.82965	3.46193	2.20242	-1.4	14.0185	5.30321	2.95571	0	36.8884
403	CC(N1C(C2=CC=C(Cl)C=C2)=O)=C(CC(O)=O)C3=C1C=CC(OC)=C3	CC[Se][Se]CC	NC(C1=CN(CC2=CC=C(C(F)(F)F)C=C2)C=CC1)=O	CC#N	CC(N1C(C2=CC=C(Cl)C=C2)=O)=C(C[Se]CC)C3=C1C=CC(OC)=C3	0	3.92732	95.7473	148.948	68.53	357.793	357.077	5	1	4	1	4	0	6	25	41	0	0	3	3	0	0	1	0	0	2	0	0	0.157895	14.5016	7.9985	6.10145	4.41613	3.07299	7.62054	5.66501	4.16415	2.947	-2.79	17.0467	6.60718	3.10467	4.73686	28.6599
420	O=C(CC1=CNC2=C1C=CC=C2)O	CC[Se][Se]CC	NC(C1=CN(CC2=CC=CC=C2)C=CC1)=O	CC#N	CC[Se]CC1=CNC2=C1C=CC=C2	0.132998	1.795	49.6385	75.0079	53.09	175.187	175.063	3	2	2	2	1	0	3	13	22	0	0	2	2	0	0	1	0	0	1	0	0	0.1	6.94932	4.03954	2.93001	2.0166	1.44079	4.03954	2.93001	2.0166	1.44079	-1.77	7.85739	2.93568	1.40216	0	16.0598
423	CC(C1=CC=C(CC2C(CCC2)=O)C=C1)C(O)=O	C1([Se][Se]C2=CC=CC=C2)=CC=CC=C1	NC(C1=CN(CC2=CC=CC=C2)C=CC1)=O	CS(C)=O	CC(C1=CC=C(CC2C(CCC2)=O)C=C1)[Se]C3=CC=CC=C3	0.676829	2.7864	68.5448	106.827	54.37	246.306	246.126	3	1	4	1	2	0	3	18	36	2	2	2	1	1	1	0	0	0	1	1	1	0.466667	10.5562	6.4202	5.0611	3.76335	2.47319	6.4202	5.0611	3.76335	2.47319	-1.64	12.8076	5.33759	2.78076	0	16.8591
432	O=C(CCC1=CC=CC=C1)O	C1([Se][Se]C2=CC=CC=C2)=CC=CC=C1	NC(C1=CN(CC2=CC=CC=C2)C=C(C(N)=O)C1C3=CC=CC=C3)=O	CS(C)=O	C1(CC[Se]C2=CC=CC=C2)=CC=CC=C1	0.646181	1.7038	42.3988	65.482	37.3	150.177	150.068	2	1	3	1	1	0	2	11	21	0	0	1	1	0	0	0	0	0	1	0	0	0.222222	6.15643	3.54552	2.37934	1.47037	0.895948	3.54552	2.37934	1.47037	0.895948	-1.31	7.7932	3.76048	2.84605	0	11.0758
433	FC1(F)CCC(C(O)=O)CC1	C1([Se][Se]C2=CC=CC=C2)=CC=CC=C1	NC(C1=CN(CC2=CC=CC=C2)C=CC1)=O	CS(C)=O	FC1(F)CCC([Se]C2=CC=CC=C2)CC1	0.267646	1.8965	34.5408	63.2099	37.3	164.151	164.065	2	1	1	1	1	0	4	11	21	0	0	1	0	1	1	0	0	0	0	1	1	0.857143	6.01717	3.61797	2.96846	2.06636	1.28709	3.61797	2.96846	2.06636	1.28709	-0.67	8.42681	2.75478	2.13307	0	16.9984
437	CC(C1=CC=C2C=C(OC)C=CC2=C1)C(O)=O	C1([Se][Se]C2=CC=CC=C2)=CC=CC=C1	NC(C1=CN(CC2=CC=CC=C2)C=C(C(N)=O)C1)=O	CS(C)=O	CC(C1=CC=C2C=C(OC)C=CC2=C1)[Se]C3=CC=CC=C3	0.640687	3.0365	66.5508	99.6421	46.53	230.263	230.094	3	1	3	1	2	0	3	17	31	1	1	2	2	0	0	0	0	0	2	0	0	0.214286	9.80516	5.42087	4.03244	2.94189	1.78119	5.42087	4.03244	2.94189	1.78119	-2.03	11.4553	4.45404	2.22849	4.73686	18.1856
439	O=C(C1(C2=CC=CC=C2)CC1)O	C1([Se][Se]C2=CC=CC=C2)=CC=CC=C1	NC(C1=CN(CC2=CC=CC=C2)C=CC1)=O	CS(C)=O	C1(C2([Se]C3=CC=CC=C3)CC2)=CC=CC=C1	0.8	1.8028	44.9898	70.8411	37.3	162.188	162.068	2	1	2	1	1	0	2	12	22	0	0	2	1	1	1	0	0	0	1	1	1	0.3	6.65643	4.04552	3.25328	2.48576	1.5082	4.04552	3.25328	2.48576	1.5082	-1.31	7.34508	2.33834	0.915677	0	11.0758
443	O=C(CCC1=CC=CC=C1)O	C1([Se][Se]C2=CC=CC=C2)=CC=CC=C1	NC(C1=CN(CC2=CC=CC=C2)C=CC1)=O	[H]C(N(C)C)=O	C1(CC[Se]C2=CC=CC=C2)=CC=CC=C1	0.0821093	1.7038	42.3988	65.482	37.3	150.177	150.068	2	1	3	1	1	0	2	11	21	0	0	1	1	0	0	0	0	0	1	0	0	0.222222	6.15643	3.54552	2.37934	1.47037	0.895948	3.54552	2.37934	1.47037	0.895948	-1.31	7.7932	3.76048	2.84605	0	11.0758
445	O=C1C2=CC(CC(O)=O)=CC=C2OCC3=CC=CC=C13	C1([Se][Se]C2=CC=CC=C2)=CC=CC=C1	NC(C1=CN(CC2=CC=CC=C2)C=CC1)=O	[H]C(N(C)C)=O	O=C1C2=CC(C[Se]C3=CC=CC=C3)=CC=C2OCC4=CC=CC=C14	0.69746	2.4371	71.9883	115.173	63.6	268.268	268.074	4	1	2	1	3	0	4	20	32	0	0	3	2	0	1	0	0	1	2	0	0	0.125	10.6276	6.2507	4.67597	3.28911	2.3333	6.2507	4.67597	3.28911	2.3333	-2.62	12.4157	4.81063	2.15906	4.73686	16.8591
449	O=C(N1CCC(C(O)=O)CC1)OCC2=CC=CC=C2	C1([Se][Se]C2=CC=CC=C2)=CC=CC=C1	NC(C1=CN(CC2=CC=CC=C2)C=CC1)=O	[H]C(N(C)C)=O	O=C(N1CCC([Se]C2=CC=CC=C2)CC1)OCC3=CC=CC=C3	0.841868	2.1198	68.5598	111.336	66.84	263.293	263.116	5	1	3	1	3	1	5	19	36	0	0	2	1	1	1	0	1	1	1	0	0	0.428571	10.6188	6.35013	4.63974	3.30753	2.11961	6.35013	4.63974	3.30753	2.11961	-2.04	13.393	6.22189	3.70857	0	35.1585
451	O=C(OCC1=CC=CC=C1)[C@H](NC(OC(C)(C)C)=O)CC(O)=O	C1([Se][Se]C2=CC=CC=C2)=CC=CC=C1	NC(C1=CN(CC2=CC=C(C(F)(F)F)C=C2)C=CC1)=O	[H]C(N(C)C)=O	O=C(OCC1=CC=CC=C1)[C@H](NC(OC(C)(C)C)=O)C[Se]C2=CC=CC=C2	0.812668	2.0978	81.6485	134.137	101.93	323.345	323.137	7	2	6	2	5	1	7	23	44	1	0	1	1	0	0	0	0	0	1	0	0	0.4375	13.3668	7.09042	5.88999	2.57815	1.64702	7.09042	5.88999	2.57815	1.64702	-2.57	18.4789	8.16525	7.84542	5.31679	34.7813
456	O=C1C2=CC(CC(O)=O)=CC=C2OCC3=CC=CC=C13	C1([Se][Se]C2=CC=CC=C2)=CC=CC=C1	NC(C1=CN(CC2=CC=CC=C2)C=C(C(N)=O)C1C3=CC=CC=C3)=O	CC#N	O=C1C2=CC(C[Se]C3=CC=CC=C3)=CC=C2OCC4=CC=CC=C14	0.38045	2.4371	71.9883	115.173	63.6	268.268	268.074	4	1	2	1	3	0	4	20	32	0	0	3	2	0	1	0	0	1	2	0	0	0.125	10.6276	6.2507	4.67597	3.28911	2.3333	6.2507	4.67597	3.28911	2.3333	-2.62	12.4157	4.81063	2.15906	4.73686	16.8591
459	CC(N1C(C2=CC=C(Cl)C=C2)=O)=C(CC(O)=O)C3=C1C=CC(OC)=C3	C1([Se][Se]C2=CC=CC=C2)=CC=CC=C1	NC(C1=CN(CC2=CC=C(OC)C=C2)C=CC1)=O	CC#N	CC(N1C(C2=CC=C(Cl)C=C2)=O)=C(C[Se]C3=CC=CC=C3)C4=C1C=CC(OC)=C4	0.54091	3.92732	95.7473	148.948	68.53	357.793	357.077	5	1	4	1	4	0	6	25	41	0	0	3	3	0	0	1	0	0	2	0	0	0.157895	14.5016	7.9985	6.10145	4.41613	3.07299	7.62054	5.66501	4.16415	2.947	-2.79	17.0467	6.60718	3.10467	4.73686	28.6599
464	CC1=CC=C(S(N2CCC(C(O)=O)CC2)(=O)=O)C=C1	C1(C[Se][Se]CC2=CC=CC=C2)=CC=CC=C1	NC(C1=CN(CC2=CC=CC=C2)C=C(C(N)=O)C1)=O	CS(C)=O	CC1=CC=C(S(N2CCC([Se]CC3=CC=CC=C3)CC2)(=O)=O)C=C1	0.04666	1.48032	70.2976	112.457	74.68	283.349	283.088	5	1	3	1	3	0	6	19	36	0	0	2	1	1	1	0	1	1	1	0	0	0.461538	11.5591	7.64682	6.76758	5.37479	3.67212	6.20676	4.82965	3.46193	2.20242	-1.4	14.0185	5.30321	2.95571	0	36.8884
465	CC(C1=CC=C(CC2C(CCC2)=O)C=C1)C(O)=O	C1(C[Se][Se]CC2=CC=CC=C2)=CC=CC=C1	NC(C1=CN(CC2=CC=C(C(F)(F)F)C=C2)C=CC1)=O	CS(C)=O	CC(C1=CC=C(CC2C(CCC2)=O)C=C1)[Se]CC3=CC=CC=C3	0.105	2.7864	68.5448	106.827	54.37	246.306	246.126	3	1	4	1	2	0	3	18	36	2	2	2	1	1	1	0	0	0	1	1	1	0.466667	10.5562	6.4202	5.0611	3.76335	2.47319	6.4202	5.0611	3.76335	2.47319	-1.64	12.8076	5.33759	2.78076	0	16.8591
468	CC(N1C(C2=CC=C(Cl)C=C2)=O)=C(CC(O)=O)C3=C1C=CC(OC)=C3	C1(C[Se][Se]CC2=CC=CC=C2)=CC=CC=C1	NC(C1=CN(CC2=CC=C(C(F)(F)F)C=C2)C=CC1)=O	CS(C)=O	CC(N1C(C2=CC=C(Cl)C=C2)=O)=C(C[Se]CC3=CC=CC=C3)C4=C1C=CC(OC)=C4	0.0824514	3.92732	95.7473	148.948	68.53	357.793	357.077	5	1	4	1	4	0	6	25	41	0	0	3	3	0	0	1	0	0	2	0	0	0.157895	14.5016	7.9985	6.10145	4.41613	3.07299	7.62054	5.66501	4.16415	2.947	-2.79	17.0467	6.60718	3.10467	4.73686	28.6599
473	O=C1C2=CC(CC(O)=O)=CC=C2OCC3=CC=CC=C13	C1(C[Se][Se]CC2=CC=CC=C2)=CC=CC=C1	NC(C1=CN(CC2=CC=CC=C2)C=CC1)=O	[H]C(N(C)C)=O	O=C1C2=CC(C[Se]CC3=CC=CC=C3)=CC=C2OCC4=CC=CC=C14	0.29609	2.4371	71.9883	115.173	63.6	268.268	268.074	4	1	2	1	3	0	4	20	32	0	0	3	2	0	1	0	0	1	2	0	0	0.125	10.6276	6.2507	4.67597	3.28911	2.3333	6.2507	4.67597	3.28911	2.3333	-2.62	12.4157	4.81063	2.15906	4.73686	16.8591
477	O=C(CCCC1=CNC2=C1C=CC=C2)O	C1(C[Se][Se]CC2=CC=CC=C2)=CC=CC=C1	NC(C1=CN(CC2=CC=C(C(F)(F)F)C=C2)C=CC1)=O	CC#N	C1(CCC[Se]CC2=CC=CC=C2)=CNC3=C1C=CC=C3	0.0265951	2.5752	58.8725	87.7378	53.09	203.241	203.095	3	2	4	2	1	0	3	15	28	0	0	2	2	0	0	1	0	0	1	0	0	0.25	8.36353	5.03954	3.60679	2.51168	1.76852	5.03954	3.60679	2.51168	1.76852	-1.77	9.77244	4.17088	2.18007	0	16.0598
487	O=C(C1CCCCC1)O	C1(C[Se][Se]CC2=CC=CC=C2)=CC=CC=C1	NC(C1=CN(CC2=CC=C(OC)C=C2)C=CC1)=O	[H]C(N(C)C)=O	C1([Se]CC2=CC=CC=C2)CCCCC1	0.0260312	1.6513	34.2108	54.8788	37.3	128.171	128.084	2	1	1	1	1	0	2	9	21	0	0	1	0	1	1	0	0	0	0	1	1	0.857143	5.46835	3.5329	2.67317	1.95441	1.34954	3.5329	2.67317	1.95441	1.34954	-0.53	6.58806	2.85257	1.6989	0	11.0758
490	O=C(C1CCCCC1)O	C1(C[Se][Se]CC2=CC=CC=C2)=CC=CC=C1	NC(C1=CN(CC2=CC=CC=C2)C=C(C(N)=O)C1C3=CC=CC=C3)=O	CC#N	C1([Se]CC2=CC=CC=C2)CCCCC1	-0.0003548	1.6513	34.2108	54.8788	37.3	128.171	128.084	2	1	1	1	1	0	2	9	21	0	0	1	0	1	1	0	0	0	0	1	1	0.857143	5.46835	3.5329	2.67317	1.95441	1.34954	3.5329	2.67317	1.95441	1.34954	-0.53	6.58806	2.85257	1.6989	0	11.0758
501	CC1=CC=C(S(N2CCC(C(O)=O)CC2)(=O)=O)C=C1	CC[Se][Se]CC	NC(C1=CN(CC2=CC=CC=C2)C=C(C(N)=O)C1C3=CC=CC=C3)=O	CS(C)=O	CC1=CC=C(S(N2CCC([Se]CC)CC2)(=O)=O)C=C1	0	1.48032	70.2976	112.457	74.68	283.349	283.088	5	1	3	1	3	0	6	19	36	0	0	2	1	1	1	0	1	1	1	0	0	0.461538	11.5591	7.64682	6.76758	5.37479	3.67212	6.20676	4.82965	3.46193	2.20242	-1.4	14.0185	5.30321	2.95571	0	36.8884
502	O=C1C2=CC(CC(O)=O)=CC=C2OCC3=CC=CC=C13	CC[Se][Se]CC	NC(C1=CN(CC2=CC=C(C(F)(F)F)C=C2)C=CC1)=O	CS(C)=O	O=C1C2=CC(C[Se]CC)=CC=C2OCC3=CC=CC=C13	0.0024844	2.4371	71.9883	115.173	63.6	268.268	268.074	4	1	2	1	3	0	4	20	32	0	0	3	2	0	1	0	0	1	2	0	0	0.125	10.6276	6.2507	4.67597	3.28911	2.3333	6.2507	4.67597	3.28911	2.3333	-2.62	12.4157	4.81063	2.15906	4.73686	16.8591
505	CC(N1C(C2=CC=C(Cl)C=C2)=O)=C(CC(O)=O)C3=C1C=CC(OC)=C3	CC[Se][Se]CC	NC(C1=CN(CC2=CC=C(C(F)(F)F)C=C2)C=CC1)=O	CS(C)=O	CC(N1C(C2=CC=C(Cl)C=C2)=O)=C(C[Se]CC)C3=C1C=CC(OC)=C3	0.148094	3.92732	95.7473	148.948	68.53	357.793	357.077	5	1	4	1	4	0	6	25	41	0	0	3	3	0	0	1	0	0	2	0	0	0.157895	14.5016	7.9985	6.10145	4.41613	3.07299	7.62054	5.66501	4.16415	2.947	-2.79	17.0467	6.60718	3.10467	4.73686	28.6599
508	CC1=CC=C(S(N2CCC(C(O)=O)CC2)(=O)=O)C=C1	CC[Se][Se]CC	NC(C1=CN(CC2=CC=C(OC)C=C2)C=CC1)=O	[H]C(N(C)C)=O	CC1=CC=C(S(N2CCC([Se]CC)CC2)(=O)=O)C=C1	0	1.48032	70.2976	112.457	74.68	283.349	283.088	5	1	3	1	3	0	6	19	36	0	0	2	1	1	1	0	1	1	1	0	0	0.461538	11.5591	7.64682	6.76758	5.37479	3.67212	6.20676	4.82965	3.46193	2.20242	-1.4	14.0185	5.30321	2.95571	0	36.8884
512	CC(C1=CC=C(CC2C(CCC2)=O)C=C1)C(O)=O	CC[Se][Se]CC	NC(C1=CN(CC2=CC=C(C(F)(F)F)C=C2)C=CC1)=O	[H]C(N(C)C)=O	CC(C1=CC=C(CC2C(CCC2)=O)C=C1)[Se]CC	0.011776	2.7864	68.5448	106.827	54.37	246.306	246.126	3	1	4	1	2	0	3	18	36	2	2	2	1	1	1	0	0	0	1	1	1	0.466667	10.5562	6.4202	5.0611	3.76335	2.47319	6.4202	5.0611	3.76335	2.47319	-1.64	12.8076	5.33759	2.78076	0	16.8591
517	CC(C1=CC=C(CC2C(CCC2)=O)C=C1)C(O)=O	CC[Se][Se]CC	NC(C1=CN(CC2=CC=C(OC)C=C2)C=CC1)=O	CC#N	CC(C1=CC=C(CC2C(CCC2)=O)C=C1)[Se]CC	0.038749	2.7864	68.5448	106.827	54.37	246.306	246.126	3	1	4	1	2	0	3	18	36	2	2	2	1	1	1	0	0	0	1	1	1	0.466667	10.5562	6.4202	5.0611	3.76335	2.47319	6.4202	5.0611	3.76335	2.47319	-1.64	12.8076	5.33759	2.78076	0	16.8591
520	BrC1=CC=C(CC(O)=O)C=C1	CC[Se][Se]CC	NC(C1=CN(CC2=CC=CC=C2)C=CC1)=O	CS(C)=O	BrC1=CC=C(C[Se]CC)C=C1	0.016918	2.0762	45.4818	72.9846	37.3	215.046	213.963	2	1	2	1	1	0	3	11	18	0	0	1	1	0	0	0	0	0	1	0	0	0.125	7.33593	3.93819	3.11266	1.79727	1.04121	3.14519	2.19698	1.26861	0.776878	-0.83	8.26833	3.52892	2.71792	0	11.0758
4	O=C(CCCC1=CNC2=C1C=CC=C2)O	C1([Se][Se]C2=CC=CC=C2)=CC=CC=C1	NC(C1=CN(CC2=CC=CC=C2)C=C(C(N)=O)C1C3=CC=CC=C3)=O	CS(C)=O	C1(CCC[Se]C2=CC=CC=C2)=CNC3=C1C=CC=C3	0.564986	2.5752	58.8725	87.7378	53.09	203.241	203.095	3	2	4	2	1	0	3	15	28	0	0	2	2	0	0	1	0	0	1	0	0	0.25	8.36353	5.03954	3.60679	2.51168	1.76852	5.03954	3.60679	2.51168	1.76852	-1.77	9.77244	4.17088	2.18007	0	16.0598
9	O=C(N1CCC(C(O)=O)CC1)OCC2=CC=CC=C2	C1([Se][Se]C2=CC=CC=C2)=CC=CC=C1	NC(C1=CN(CC2=CC=C(OC)C=C2)C=CC1)=O	CS(C)=O	O=C(N1CCC([Se]C2=CC=CC=C2)CC1)OCC3=CC=CC=C3	0.854504	2.1198	68.5598	111.336	66.84	263.293	263.116	5	1	3	1	3	1	5	19	36	0	0	2	1	1	1	0	1	1	1	0	0	0.428571	10.6188	6.35013	4.63974	3.30753	2.11961	6.35013	4.63974	3.30753	2.11961	-2.04	13.393	6.22189	3.70857	0	35.1585
10	O=C(N1CCC(C(O)=O)CC1)OCC2=CC=CC=C2	C1([Se][Se]C2=CC=CC=C2)=CC=CC=C1	NC(C1=CN(CC2=CC=CC=C2)C=C(C(N)=O)C1)=O	CS(C)=O	O=C(N1CCC([Se]C2=CC=CC=C2)CC1)OCC3=CC=CC=C3	0.830446	2.1198	68.5598	111.336	66.84	263.293	263.116	5	1	3	1	3	1	5	19	36	0	0	2	1	1	1	0	1	1	1	0	0	0.428571	10.6188	6.35013	4.63974	3.30753	2.11961	6.35013	4.63974	3.30753	2.11961	-2.04	13.393	6.22189	3.70857	0	35.1585
12	CC(C1=CC=C2C=C(OC)C=CC2=C1)C(O)=O	C1([Se][Se]C2=CC=CC=C2)=CC=CC=C1	NC(C1=CN(CC2=CC=C(OC)C=C2)C=CC1)=O	CS(C)=O	CC(C1=CC=C2C=C(OC)C=CC2=C1)[Se]C3=CC=CC=C3	0.605574	3.0365	66.5508	99.6421	46.53	230.263	230.094	3	1	3	1	2	0	3	17	31	1	1	2	2	0	0	0	0	0	2	0	0	0.214286	9.80516	5.42087	4.03244	2.94189	1.78119	5.42087	4.03244	2.94189	1.78119	-2.03	11.4553	4.45404	2.22849	4.73686	18.1856
15	O=C(C1(C2=CC=CC=C2)CC1)O	C1([Se][Se]C2=CC=CC=C2)=CC=CC=C1	NC(C1=CN(CC2=CC=CC=C2)C=C(C(N)=O)C1)=O	CS(C)=O	C1(C2([Se]C3=CC=CC=C3)CC2)=CC=CC=C1	0.586629	1.8028	44.9898	70.8411	37.3	162.188	162.068	2	1	2	1	1	0	2	12	22	0	0	2	1	1	1	0	0	0	1	1	1	0.3	6.65643	4.04552	3.25328	2.48576	1.5082	4.04552	3.25328	2.48576	1.5082	-1.31	7.34508	2.33834	0.915677	0	11.0758
16	CC1=CC=C(S(N2CCC(C(O)=O)CC2)(=O)=O)C=C1	C1([Se][Se]C2=CC=CC=C2)=CC=CC=C1	NC(C1=CN(CC2=CC=C(OC)C=C2)C=CC1)=O	[H]C(N(C)C)=O	CC1=CC=C(S(N2CCC([Se]C3=CC=CC=C3)CC2)(=O)=O)C=C1	0.640715	1.48032	70.2976	112.457	74.68	283.349	283.088	5	1	3	1	3	0	6	19	36	0	0	2	1	1	1	0	1	1	1	0	0	0.461538	11.5591	7.64682	6.76758	5.37479	3.67212	6.20676	4.82965	3.46193	2.20242	-1.4	14.0185	5.30321	2.95571	0	36.8884
19	FC1(F)CCC(C(O)=O)CC1	C1([Se][Se]C2=CC=CC=C2)=CC=CC=C1	NC(C1=CN(CC2=CC=CC=C2)C=C(C(N)=O)C1C3=CC=CC=C3)=O	[H]C(N(C)C)=O	FC1(F)CCC([Se]C2=CC=CC=C2)CC1	0.14899	1.8965	34.5408	63.2099	37.3	164.151	164.065	2	1	1	1	1	0	4	11	21	0	0	1	0	1	1	0	0	0	0	1	1	0.857143	6.01717	3.61797	2.96846	2.06636	1.28709	3.61797	2.96846	2.06636	1.28709	-0.67	8.42681	2.75478	2.13307	0	16.9984
20	CC(C1=CC=C(CC2C(CCC2)=O)C=C1)C(O)=O	C1([Se][Se]C2=CC=CC=C2)=CC=CC=C1	NC(C1=CN(CC2=CC=CC=C2)C=C(C(N)=O)C1C3=CC=CC=C3)=O	[H]C(N(C)C)=O	CC(C1=CC=C(CC2C(CCC2)=O)C=C1)[Se]C3=CC=CC=C3	0.00954165	2.7864	68.5448	106.827	54.37	246.306	246.126	3	1	4	1	2	0	3	18	36	2	2	2	1	1	1	0	0	0	1	1	1	0.466667	10.5562	6.4202	5.0611	3.76335	2.47319	6.4202	5.0611	3.76335	2.47319	-1.64	12.8076	5.33759	2.78076	0	16.8591
22	CC(N1C(C2=CC=C(Cl)C=C2)=O)=C(CC(O)=O)C3=C1C=CC(OC)=C3	C1([Se][Se]C2=CC=CC=C2)=CC=CC=C1	NC(C1=CN(CC2=CC=CC=C2)C=C(C(N)=O)C1C3=CC=CC=C3)=O	[H]C(N(C)C)=O	CC(N1C(C2=CC=C(Cl)C=C2)=O)=C(C[Se]C3=CC=CC=C3)C4=C1C=CC(OC)=C4	0.320481	3.92732	95.7473	148.948	68.53	357.793	357.077	5	1	4	1	4	0	6	25	41	0	0	3	3	0	0	1	0	0	2	0	0	0.157895	14.5016	7.9985	6.10145	4.41613	3.07299	7.62054	5.66501	4.16415	2.947	-2.79	17.0467	6.60718	3.10467	4.73686	28.6599
30	CC(C1=CC=C2C=C(OC)C=CC2=C1)C(O)=O	C1([Se][Se]C2=CC=CC=C2)=CC=CC=C1	NC(C1=CN(CC2=CC=CC=C2)C=CC1)=O	[H]C(N(C)C)=O	CC(C1=CC=C2C=C(OC)C=CC2=C1)[Se]C3=CC=CC=C3	0.642473	3.0365	66.5508	99.6421	46.53	230.263	230.094	3	1	3	1	2	0	3	17	31	1	1	2	2	0	0	0	0	0	2	0	0	0.214286	9.80516	5.42087	4.03244	2.94189	1.78119	5.42087	4.03244	2.94189	1.78119	-2.03	11.4553	4.45404	2.22849	4.73686	18.1856
39	O=C1C2=CC(CC(O)=O)=CC=C2OCC3=CC=CC=C13	C1([Se][Se]C2=CC=CC=C2)=CC=CC=C1	NC(C1=CN(CC2=CC=CC=C2)C=C(C(N)=O)C1)=O	CC#N	O=C1C2=CC(C[Se]C3=CC=CC=C3)=CC=C2OCC4=CC=CC=C14	0.476499	2.4371	71.9883	115.173	63.6	268.268	268.074	4	1	2	1	3	0	4	20	32	0	0	3	2	0	1	0	0	1	2	0	0	0.125	10.6276	6.2507	4.67597	3.28911	2.3333	6.2507	4.67597	3.28911	2.3333	-2.62	12.4157	4.81063	2.15906	4.73686	16.8591
40	CC(C1=CC=C(CC2C(CCC2)=O)C=C1)C(O)=O	C1([Se][Se]C2=CC=CC=C2)=CC=CC=C1	NC(C1=CN(CC2=CC=CC=C2)C=CC1)=O	CC#N	CC(C1=CC=C(CC2C(CCC2)=O)C=C1)[Se]C3=CC=CC=C3	0.549839	2.7864	68.5448	106.827	54.37	246.306	246.126	3	1	4	1	2	0	3	18	36	2	2	2	1	1	1	0	0	0	1	1	1	0.466667	10.5562	6.4202	5.0611	3.76335	2.47319	6.4202	5.0611	3.76335	2.47319	-1.64	12.8076	5.33759	2.78076	0	16.8591
41	CC1=CC=C(CC(O)=O)C=C1	C1([Se][Se]C2=CC=CC=C2)=CC=CC=C1	NC(C1=CN(CC2=CC=C(C(F)(F)F)C=C2)C=CC1)=O	CC#N	CC1=CC=C(C[Se]C2=CC=CC=C2)C=C1	0.118179	1.62212	42.5188	65.482	37.3	150.177	150.068	2	1	2	1	1	0	2	11	21	0	0	1	1	0	0	0	0	0	1	0	0	0.222222	6.37197	3.4562	2.55611	1.47595	0.880551	3.4562	2.55611	1.47595	0.880551	-1.31	7.7932	3.19116	2.41518	0	11.0758
42	CC1=CC=C(CC(O)=O)C=C1	C1([Se][Se]C2=CC=CC=C2)=CC=CC=C1	NC(C1=CN(CC2=CC=CC=C2)C=C(C(N)=O)C1C3=CC=CC=C3)=O	CC#N	CC1=CC=C(C[Se]C2=CC=CC=C2)C=C1	0	1.62212	42.5188	65.482	37.3	150.177	150.068	2	1	2	1	1	0	2	11	21	0	0	1	1	0	0	0	0	0	1	0	0	0.222222	6.37197	3.4562	2.55611	1.47595	0.880551	3.4562	2.55611	1.47595	0.880551	-1.31	7.7932	3.19116	2.41518	0	11.0758
53	O=C1C2=CC(CC(O)=O)=CC=C2OCC3=CC=CC=C13	C1(C[Se][Se]CC2=CC=CC=C2)=CC=CC=C1	NC(C1=CN(CC2=CC=CC=C2)C=C(C(N)=O)C1)=O	CS(C)=O	O=C1C2=CC(C[Se]CC3=CC=CC=C3)=CC=C2OCC4=CC=CC=C14	0.276098	2.4371	71.9883	115.173	63.6	268.268	268.074	4	1	2	1	3	0	4	20	32	0	0	3	2	0	1	0	0	1	2	0	0	0.125	10.6276	6.2507	4.67597	3.28911	2.3333	6.2507	4.67597	3.28911	2.3333	-2.62	12.4157	4.81063	2.15906	4.73686	16.8591
60	CC(C1=CC=C(CC2C(CCC2)=O)C=C1)C(O)=O	C1(C[Se][Se]CC2=CC=CC=C2)=CC=CC=C1	NC(C1=CN(CC2=CC=CC=C2)C=C(C(N)=O)C1)=O	[H]C(N(C)C)=O	CC(C1=CC=C(CC2C(CCC2)=O)C=C1)[Se]CC3=CC=CC=C3	0.0042015	2.7864	68.5448	106.827	54.37	246.306	246.126	3	1	4	1	2	0	3	18	36	2	2	2	1	1	1	0	0	0	1	1	1	0.466667	10.5562	6.4202	5.0611	3.76335	2.47319	6.4202	5.0611	3.76335	2.47319	-1.64	12.8076	5.33759	2.78076	0	16.8591
66	CC(C1=CC=C2C=C(OC)C=CC2=C1)C(O)=O	C1(C[Se][Se]CC2=CC=CC=C2)=CC=CC=C1	NC(C1=CN(CC2=CC=C(OC)C=C2)C=CC1)=O	CS(C)=O	CC(C1=CC=C2C=C(OC)C=CC2=C1)[Se]CC3=CC=CC=C3	0.0975506	3.0365	66.5508	99.6421	46.53	230.263	230.094	3	1	3	1	2	0	3	17	31	1	1	2	2	0	0	0	0	0	2	0	0	0.214286	9.80516	5.42087	4.03244	2.94189	1.78119	5.42087	4.03244	2.94189	1.78119	-2.03	11.4553	4.45404	2.22849	4.73686	18.1856
68	O=C(C1CCCCC1)O	C1(C[Se][Se]CC2=CC=CC=C2)=CC=CC=C1	NC(C1=CN(CC2=CC=CC=C2)C=C(C(N)=O)C1C3=CC=CC=C3)=O	[H]C(N(C)C)=O	C1([Se]CC2=CC=CC=C2)CCCCC1	-0.0007096	1.6513	34.2108	54.8788	37.3	128.171	128.084	2	1	1	1	1	0	2	9	21	0	0	1	0	1	1	0	0	0	0	1	1	0.857143	5.46835	3.5329	2.67317	1.95441	1.34954	3.5329	2.67317	1.95441	1.34954	-0.53	6.58806	2.85257	1.6989	0	11.0758
69	O=C(N1CCC(C(O)=O)CC1)OCC2=CC=CC=C2	C1(C[Se][Se]CC2=CC=CC=C2)=CC=CC=C1	NC(C1=CN(CC2=CC=C(C(F)(F)F)C=C2)C=CC1)=O	[H]C(N(C)C)=O	O=C(N1CCC([Se]CC2=CC=CC=C2)CC1)OCC3=CC=CC=C3	0.0495984	2.1198	68.5598	111.336	66.84	263.293	263.116	5	1	3	1	3	1	5	19	36	0	0	2	1	1	1	0	1	1	1	0	0	0.428571	10.6188	6.35013	4.63974	3.30753	2.11961	6.35013	4.63974	3.30753	2.11961	-2.04	13.393	6.22189	3.70857	0	35.1585
70	O=C(OCC1=CC=CC=C1)[C@H](NC(OC(C)(C)C)=O)CC(O)=O	C1(C[Se][Se]CC2=CC=CC=C2)=CC=CC=C1	NC(C1=CN(CC2=CC=CC=C2)C=CC1)=O	[H]C(N(C)C)=O	O=C(OCC1=CC=CC=C1)[C@H](NC(OC(C)(C)C)=O)C[Se]CC2=CC=CC=C2	0.00601089	2.0978	81.6485	134.137	101.93	323.345	323.137	7	2	6	2	5	1	7	23	44	1	0	1	1	0	0	0	0	0	1	0	0	0.4375	13.3668	7.09042	5.88999	2.57815	1.64702	7.09042	5.88999	2.57815	1.64702	-2.57	18.4789	8.16525	7.84542	5.31679	34.7813
82	CC(C1=CC=C(CC2C(CCC2)=O)C=C1)C(O)=O	CC[Se][Se]CC	NC(C1=CN(CC2=CC=C(OC)C=C2)C=CC1)=O	[H]C(N(C)C)=O	CC(C1=CC=C(CC2C(CCC2)=O)C=C1)[Se]CC	0.140148	2.7864	68.5448	106.827	54.37	246.306	246.126	3	1	4	1	2	0	3	18	36	2	2	2	1	1	1	0	0	0	1	1	1	0.466667	10.5562	6.4202	5.0611	3.76335	2.47319	6.4202	5.0611	3.76335	2.47319	-1.64	12.8076	5.33759	2.78076	0	16.8591
85	CC(N1C(C2=CC=C(Cl)C=C2)=O)=C(CC(O)=O)C3=C1C=CC(OC)=C3	CC[Se][Se]CC	NC(C1=CN(CC2=CC=CC=C2)C=C(C(N)=O)C1C3=CC=CC=C3)=O	[H]C(N(C)C)=O	CC(N1C(C2=CC=C(Cl)C=C2)=O)=C(C[Se]CC)C3=C1C=CC(OC)=C3	0.0285	3.92732	95.7473	148.948	68.53	357.793	357.077	5	1	4	1	4	0	6	25	41	0	0	3	3	0	0	1	0	0	2	0	0	0.157895	14.5016	7.9985	6.10145	4.41613	3.07299	7.62054	5.66501	4.16415	2.947	-2.79	17.0467	6.60718	3.10467	4.73686	28.6599
87	CC(N(C(C1=C2C=CC=C1)=O)C2=O)C(O)=O	CC[Se][Se]CC	NC(C1=CN(CC2=CC=CC=C2)C=C(C(N)=O)C1C3=CC=CC=C3)=O	CC#N	CC(N(C(C1=C2C=CC=C1)=O)C2=O)[Se]CC	0	0.7557	54.0398	91.2889	74.68	219.196	219.053	5	1	2	1	3	2	5	16	25	1	1	2	1	0	1	0	0	1	1	0	0	0.181818	8.50592	4.73477	3.5401	2.57017	1.67007	4.73477	3.5401	2.57017	1.67007	-2.17	10.3513	3.44496	1.28736	0	33.8319
95	CC1=CC=C(CC(O)=O)C=C1	CC[Se][Se]CC	NC(C1=CN(CC2=CC=CC=C2)C=C(C(N)=O)C1)=O	CS(C)=O	CC1=CC=C(C[Se]CC)C=C1	0	1.62212	42.5188	65.482	37.3	150.177	150.068	2	1	2	1	1	0	2	11	21	0	0	1	1	0	0	0	0	0	1	0	0	0.222222	6.37197	3.4562	2.55611	1.47595	0.880551	3.4562	2.55611	1.47595	0.880551	-1.31	7.7932	3.19116	2.41518	0	11.0758
100	BrC1=CC=C(CC(O)=O)C=C1	CC[Se][Se]CC	NC(C1=CN(CC2=CC=C(C(F)(F)F)C=C2)C=CC1)=O	[H]C(N(C)C)=O	BrC1=CC=C(C[Se]CC)C=C1	0	2.0762	45.4818	72.9846	37.3	215.046	213.963	2	1	2	1	1	0	3	11	18	0	0	1	1	0	0	0	0	0	1	0	0	0.125	7.33593	3.93819	3.11266	1.79727	1.04121	3.14519	2.19698	1.26861	0.776878	-0.83	8.26833	3.52892	2.71792	0	11.0758
102	COC1=CC=C(CC(O)=O)C=C1	CC[Se][Se]CC	NC(C1=CN(CC2=CC=CC=C2)C=C(C(N)=O)C1)=O	[H]C(N(C)C)=O	COC1=CC=C(C[Se]CC)C=C1	0.0494888	1.3223	44.3338	70.5955	46.53	166.176	166.063	3	1	3	1	2	0	3	12	22	0	0	1	1	0	0	0	0	0	1	0	0	0.222222	6.78022	3.56858	2.41859	1.5144	0.918008	3.56858	2.41859	1.5144	0.918008	-1.51	8.58533	3.75887	2.26848	4.73686	18.1856
109	CC(C1=CC=C(CC2C(CCC2)=O)C=C1)C(O)=O	C1([Se][Se]C2=CC=CC=C2)=CC=CC=C1	NC(C1=CN(CC2=CC=C(OC)C=C2)C=CC1)=O	CS(C)=O	CC(C1=CC=C(CC2C(CCC2)=O)C=C1)[Se]C3=CC=CC=C3	0.596632	2.7864	68.5448	106.827	54.37	246.306	246.126	3	1	4	1	2	0	3	18	36	2	2	2	1	1	1	0	0	0	1	1	1	0.466667	10.5562	6.4202	5.0611	3.76335	2.47319	6.4202	5.0611	3.76335	2.47319	-1.64	12.8076	5.33759	2.78076	0	16.8591
118	FC1(F)CCC(C(O)=O)CC1	C1([Se][Se]C2=CC=CC=C2)=CC=CC=C1	NC(C1=CN(CC2=CC=C(OC)C=C2)C=CC1)=O	CS(C)=O	FC1(F)CCC([Se]C2=CC=CC=C2)CC1	0.258989	1.8965	34.5408	63.2099	37.3	164.151	164.065	2	1	1	1	1	0	4	11	21	0	0	1	0	1	1	0	0	0	0	1	1	0.857143	6.01717	3.61797	2.96846	2.06636	1.28709	3.61797	2.96846	2.06636	1.28709	-0.67	8.42681	2.75478	2.13307	0	16.9984
120	O=C(C1CCOCC1)O	C1([Se][Se]C2=CC=CC=C2)=CC=CC=C1	NC(C1=CN(CC2=CC=CC=C2)C=CC1)=O	CS(C)=O	C1([Se]C2=CC=CC=C2)CCOCC1	0.869418	0.4976	31.1788	53.6274	46.53	130.143	130.063	3	1	1	1	2	0	3	9	19	0	0	1	0	1	1	0	1	1	0	0	0	0.833333	5.16949	3.11025	2.22488	1.57054	0.944535	3.11025	2.22488	1.57054	0.944535	-0.57	6.54862	2.82385	1.67686	0	24.2896
124	O=C(OCC1=CC=CC=C1)[C@H](NC(OC(C)(C)C)=O)CC(O)=O	C1([Se][Se]C2=CC=CC=C2)=CC=CC=C1	NC(C1=CN(CC2=CC=C(C(F)(F)F)C=C2)C=CC1)=O	CS(C)=O	O=C(OCC1=CC=CC=C1)[C@H](NC(OC(C)(C)C)=O)C[Se]C2=CC=CC=C2	0.812668	2.0978	81.6485	134.137	101.93	323.345	323.137	7	2	6	2	5	1	7	23	44	1	0	1	1	0	0	0	0	0	1	0	0	0.4375	13.3668	7.09042	5.88999	2.57815	1.64702	7.09042	5.88999	2.57815	1.64702	-2.57	18.4789	8.16525	7.84542	5.31679	34.7813
130	CC(C1=CC=C(CC2C(CCC2)=O)C=C1)C(O)=O	C1([Se][Se]C2=CC=CC=C2)=CC=CC=C1	NC(C1=CN(CC2=CC=C(C(F)(F)F)C=C2)C=CC1)=O	[H]C(N(C)C)=O	CC(C1=CC=C(CC2C(CCC2)=O)C=C1)[Se]C3=CC=CC=C3	0.545201	2.7864	68.5448	106.827	54.37	246.306	246.126	3	1	4	1	2	0	3	18	36	2	2	2	1	1	1	0	0	0	1	1	1	0.466667	10.5562	6.4202	5.0611	3.76335	2.47319	6.4202	5.0611	3.76335	2.47319	-1.64	12.8076	5.33759	2.78076	0	16.8591
132	BrC1=CC=C(CC(O)=O)C=C1	C1([Se][Se]C2=CC=CC=C2)=CC=CC=C1	NC(C1=CN(CC2=CC=CC=C2)C=CC1)=O	[H]C(N(C)C)=O	BrC1=CC=C(C[Se]C2=CC=CC=C2)C=C1	0.422796	2.0762	45.4818	72.9846	37.3	215.046	213.963	2	1	2	1	1	0	3	11	18	0	0	1	1	0	0	0	0	0	1	0	0	0.125	7.33593	3.93819	3.11266	1.79727	1.04121	3.14519	2.19698	1.26861	0.776878	-0.83	8.26833	3.52892	2.71792	0	11.0758
135	COC1=CC=C(CC(O)=O)C=C1	C1([Se][Se]C2=CC=CC=C2)=CC=CC=C1	NC(C1=CN(CC2=CC=C(OC)C=C2)C=CC1)=O	[H]C(N(C)C)=O	COC1=CC=C(C[Se]C2=CC=CC=C2)C=C1	0.678428	1.3223	44.3338	70.5955	46.53	166.176	166.063	3	1	3	1	2	0	3	12	22	0	0	1	1	0	0	0	0	0	1	0	0	0.222222	6.78022	3.56858	2.41859	1.5144	0.918008	3.56858	2.41859	1.5144	0.918008	-1.51	8.58533	3.75887	2.26848	4.73686	18.1856
141	CC1=CC=C(S(N2CCC(C(O)=O)CC2)(=O)=O)C=C1	C1([Se][Se]C2=CC=CC=C2)=CC=CC=C1	NC(C1=CN(CC2=CC=C(OC)C=C2)C=CC1)=O	CC#N	CC1=CC=C(S(N2CCC([Se]C3=CC=CC=C3)CC2)(=O)=O)C=C1	0.99	1.48032	70.2976	112.457	74.68	283.349	283.088	5	1	3	1	3	0	6	19	36	0	0	2	1	1	1	0	1	1	1	0	0	0.461538	11.5591	7.64682	6.76758	5.37479	3.67212	6.20676	4.82965	3.46193	2.20242	-1.4	14.0185	5.30321	2.95571	0	36.8884
147	CC1=C(CC(O)=O)C=CC=C1	C1([Se][Se]C2=CC=CC=C2)=CC=CC=C1	NC(C1=CN(CC2=CC=CC=C2)C=C(C(N)=O)C1C3=CC=CC=C3)=O	CC#N	CC1=C(C[Se]C2=CC=CC=C2)C=CC=C1	0	1.62212	42.5188	65.482	37.3	150.177	150.068	2	1	2	1	1	0	2	11	21	0	0	1	1	0	0	0	0	0	1	0	0	0.222222	6.37197	3.46219	2.497	1.60293	0.971355	3.46219	2.497	1.60293	0.971355	-1.31	7.7932	3.19116	2.07522	0	11.0758
150	O=C(N1CCC(C(O)=O)CC1)OCC2=CC=CC=C2	C1([Se][Se]C2=CC=CC=C2)=CC=CC=C1	NC(C1=CN(CC2=CC=CC=C2)C=C(C(N)=O)C1C3=CC=CC=C3)=O	CC#N	O=C(N1CCC([Se]C2=CC=CC=C2)CC1)OCC3=CC=CC=C3	0.070848	2.1198	68.5598	111.336	66.84	263.293	263.116	5	1	3	1	3	1	5	19	36	0	0	2	1	1	1	0	1	1	1	0	0	0.428571	10.6188	6.35013	4.63974	3.30753	2.11961	6.35013	4.63974	3.30753	2.11961	-2.04	13.393	6.22189	3.70857	0	35.1585
153	O=C(C1(C2=CC=CC=C2)CC1)O	C1([Se][Se]C2=CC=CC=C2)=CC=CC=C1	NC(C1=CN(CC2=CC=CC=C2)C=C(C(N)=O)C1)=O	CC#N	C1(C2([Se]C3=CC=CC=C3)CC2)=CC=CC=C1	0.0870504	1.8028	44.9898	70.8411	37.3	162.188	162.068	2	1	2	1	1	0	2	12	22	0	0	2	1	1	1	0	0	0	1	1	1	0.3	6.65643	4.04552	3.25328	2.48576	1.5082	4.04552	3.25328	2.48576	1.5082	-1.31	7.34508	2.33834	0.915677	0	11.0758
160	CC(C1=CC=C(CC2C(CCC2)=O)C=C1)C(O)=O	C1(C[Se][Se]CC2=CC=CC=C2)=CC=CC=C1	NC(C1=CN(CC2=CC=CC=C2)C=C(C(N)=O)C1C3=CC=CC=C3)=O	CS(C)=O	CC(C1=CC=C(CC2C(CCC2)=O)C=C1)[Se]CC3=CC=CC=C3	0	2.7864	68.5448	106.827	54.37	246.306	246.126	3	1	4	1	2	0	3	18	36	2	2	2	1	1	1	0	0	0	1	1	1	0.466667	10.5562	6.4202	5.0611	3.76335	2.47319	6.4202	5.0611	3.76335	2.47319	-1.64	12.8076	5.33759	2.78076	0	16.8591
173	O=C(N1CCC(C(O)=O)CC1)OCC2=CC=CC=C2	C1(C[Se][Se]CC2=CC=CC=C2)=CC=CC=C1	NC(C1=CN(CC2=CC=C(C(F)(F)F)C=C2)C=CC1)=O	CS(C)=O	O=C(N1CCC([Se]CC2=CC=CC=C2)CC1)OCC3=CC=CC=C3	0.048279	2.1198	68.5598	111.336	66.84	263.293	263.116	5	1	3	1	3	1	5	19	36	0	0	2	1	1	1	0	1	1	1	0	0	0.428571	10.6188	6.35013	4.63974	3.30753	2.11961	6.35013	4.63974	3.30753	2.11961	-2.04	13.393	6.22189	3.70857	0	35.1585
175	O=C(OCC1=CC=CC=C1)[C@H](NC(OC(C)(C)C)=O)CC(O)=O	C1(C[Se][Se]CC2=CC=CC=C2)=CC=CC=C1	NC(C1=CN(CC2=CC=CC=C2)C=C(C(N)=O)C1C3=CC=CC=C3)=O	CS(C)=O	O=C(OCC1=CC=CC=C1)[C@H](NC(OC(C)(C)C)=O)C[Se]CC2=CC=CC=C2	0.0081975	2.0978	81.6485	134.137	101.93	323.345	323.137	7	2	6	2	5	1	7	23	44	1	0	1	1	0	0	0	0	0	1	0	0	0.4375	13.3668	7.09042	5.88999	2.57815	1.64702	7.09042	5.88999	2.57815	1.64702	-2.57	18.4789	8.16525	7.84542	5.31679	34.7813
181	O=C(N1CCC(C(O)=O)CC1)OCC2=CC=CC=C2	C1(C[Se][Se]CC2=CC=CC=C2)=CC=CC=C1	NC(C1=CN(CC2=CC=CC=C2)C=C(C(N)=O)C1)=O	[H]C(N(C)C)=O	O=C(N1CCC([Se]CC2=CC=CC=C2)CC1)OCC3=CC=CC=C3	0.015294	2.1198	68.5598	111.336	66.84	263.293	263.116	5	1	3	1	3	1	5	19	36	0	0	2	1	1	1	0	1	1	1	0	0	0.428571	10.6188	6.35013	4.63974	3.30753	2.11961	6.35013	4.63974	3.30753	2.11961	-2.04	13.393	6.22189	3.70857	0	35.1585
189	CC(N(C(C1=C2C=CC=C1)=O)C2=O)C(O)=O	CC[Se][Se]CC	NC(C1=CN(CC2=CC=CC=C2)C=CC1)=O	CS(C)=O	CC(N(C(C1=C2C=CC=C1)=O)C2=O)[Se]CC	0	0.7557	54.0398	91.2889	74.68	219.196	219.053	5	1	2	1	3	2	5	16	25	1	1	2	1	0	1	0	0	1	1	0	0	0.181818	8.50592	4.73477	3.5401	2.57017	1.67007	4.73477	3.5401	2.57017	1.67007	-2.17	10.3513	3.44496	1.28736	0	33.8319
190	CC(C1=CC=C(CC2C(CCC2)=O)C=C1)C(O)=O	CC[Se][Se]CC	NC(C1=CN(CC2=CC=CC=C2)C=CC1)=O	CS(C)=O	CC(C1=CC=C(CC2C(CCC2)=O)C=C1)[Se]CC	0.262026	2.7864	68.5448	106.827	54.37	246.306	246.126	3	1	4	1	2	0	3	18	36	2	2	2	1	1	1	0	0	0	1	1	1	0.466667	10.5562	6.4202	5.0611	3.76335	2.47319	6.4202	5.0611	3.76335	2.47319	-1.64	12.8076	5.33759	2.78076	0	16.8591
193	CC(N1C(C2=CC=C(Cl)C=C2)=O)=C(CC(O)=O)C3=C1C=CC(OC)=C3	CC[Se][Se]CC	NC(C1=CN(CC2=CC=CC=C2)C=C(C(N)=O)C1)=O	CS(C)=O	CC(N1C(C2=CC=C(Cl)C=C2)=O)=C(C[Se]CC)C3=C1C=CC(OC)=C3	0.162438	3.92732	95.7473	148.948	68.53	357.793	357.077	5	1	4	1	4	0	6	25	41	0	0	3	3	0	0	1	0	0	2	0	0	0.157895	14.5016	7.9985	6.10145	4.41613	3.07299	7.62054	5.66501	4.16415	2.947	-2.79	17.0467	6.60718	3.10467	4.73686	28.6599
194	O=C1C2=CC(CC(O)=O)=CC=C2OCC3=CC=CC=C13	CC[Se][Se]CC	NC(C1=CN(CC2=CC=CC=C2)C=CC1)=O	[H]C(N(C)C)=O	O=C1C2=CC(C[Se]CC)=CC=C2OCC3=CC=CC=C13	0	2.4371	71.9883	115.173	63.6	268.268	268.074	4	1	2	1	3	0	4	20	32	0	0	3	2	0	1	0	0	1	2	0	0	0.125	10.6276	6.2507	4.67597	3.28911	2.3333	6.2507	4.67597	3.28911	2.3333	-2.62	12.4157	4.81063	2.15906	4.73686	16.8591
196	CC(C1=CC=C(CC2C(CCC2)=O)C=C1)C(O)=O	CC[Se][Se]CC	NC(C1=CN(CC2=CC=CC=C2)C=CC1)=O	[H]C(N(C)C)=O	CC(C1=CC=C(CC2C(CCC2)=O)C=C1)[Se]CC	0.131822	2.7864	68.5448	106.827	54.37	246.306	246.126	3	1	4	1	2	0	3	18	36	2	2	2	1	1	1	0	0	0	1	1	1	0.466667	10.5562	6.4202	5.0611	3.76335	2.47319	6.4202	5.0611	3.76335	2.47319	-1.64	12.8076	5.33759	2.78076	0	16.8591
205	O=C(CC1=CNC2=C1C=CC=C2)O	CC[Se][Se]CC	NC(C1=CN(CC2=CC=CC=C2)C=C(C(N)=O)C1C3=CC=CC=C3)=O	CS(C)=O	CC[Se]CC1=CNC2=C1C=CC=C2	0.194015	1.795	49.6385	75.0079	53.09	175.187	175.063	3	2	2	2	1	0	3	13	22	0	0	2	2	0	0	1	0	0	1	0	0	0.1	6.94932	4.03954	2.93001	2.0166	1.44079	4.03954	2.93001	2.0166	1.44079	-1.77	7.85739	2.93568	1.40216	0	16.0598
210	CC1=CC=C(CC(O)=O)C=C1	CC[Se][Se]CC	NC(C1=CN(CC2=CC=CC=C2)C=C(C(N)=O)C1)=O	CC#N	CC1=CC=C(C[Se]CC)C=C1	0	1.62212	42.5188	65.482	37.3	150.177	150.068	2	1	2	1	1	0	2	11	21	0	0	1	1	0	0	0	0	0	1	0	0	0.222222	6.37197	3.4562	2.55611	1.47595	0.880551	3.4562	2.55611	1.47595	0.880551	-1.31	7.7932	3.19116	2.41518	0	11.0758
211	CC1=CC=C(CC(O)=O)C=C1	CC[Se][Se]CC	NC(C1=CN(CC2=CC=CC=C2)C=C(C(N)=O)C1C3=CC=CC=C3)=O	CC#N	CC1=CC=C(C[Se]CC)C=C1	0	1.62212	42.5188	65.482	37.3	150.177	150.068	2	1	2	1	1	0	2	11	21	0	0	1	1	0	0	0	0	0	1	0	0	0.222222	6.37197	3.4562	2.55611	1.47595	0.880551	3.4562	2.55611	1.47595	0.880551	-1.31	7.7932	3.19116	2.41518	0	11.0758
221	O=C1C2=CC(CC(O)=O)=CC=C2OCC3=CC=CC=C13	C1([Se][Se]C2=CC=CC=C2)=CC=CC=C1	NC(C1=CN(CC2=CC=CC=C2)C=C(C(N)=O)C1C3=CC=CC=C3)=O	CS(C)=O	O=C1C2=CC(C[Se]C3=CC=CC=C3)=CC=C2OCC4=CC=CC=C14	0.624032	2.4371	71.9883	115.173	63.6	268.268	268.074	4	1	2	1	3	0	4	20	32	0	0	3	2	0	1	0	0	1	2	0	0	0.125	10.6276	6.2507	4.67597	3.28911	2.3333	6.2507	4.67597	3.28911	2.3333	-2.62	12.4157	4.81063	2.15906	4.73686	16.8591
223	O=C(C1CCOCC1)O	C1([Se][Se]C2=CC=CC=C2)=CC=CC=C1	NC(C1=CN(CC2=CC=CC=C2)C=C(C(N)=O)C1C3=CC=CC=C3)=O	CS(C)=O	C1([Se]C2=CC=CC=C2)CCOCC1	0.495	0.4976	31.1788	53.6274	46.53	130.143	130.063	3	1	1	1	2	0	3	9	19	0	0	1	0	1	1	0	1	1	0	0	0	0.833333	5.16949	3.11025	2.22488	1.57054	0.944535	3.11025	2.22488	1.57054	0.944535	-0.57	6.54862	2.82385	1.67686	0	24.2896
224	O=C(N1CCC(C(O)=O)CC1)OCC2=CC=CC=C2	C1([Se][Se]C2=CC=CC=C2)=CC=CC=C1	NC(C1=CN(CC2=CC=C(C(F)(F)F)C=C2)C=CC1)=O	CS(C)=O	O=C(N1CCC([Se]C2=CC=CC=C2)CC1)OCC3=CC=CC=C3	0.900216	2.1198	68.5598	111.336	66.84	263.293	263.116	5	1	3	1	3	1	5	19	36	0	0	2	1	1	1	0	1	1	1	0	0	0.428571	10.6188	6.35013	4.63974	3.30753	2.11961	6.35013	4.63974	3.30753	2.11961	-2.04	13.393	6.22189	3.70857	0	35.1585
226	O=C1C2=CC(CC(O)=O)=CC=C2OCC3=CC=CC=C13	C1([Se][Se]C2=CC=CC=C2)=CC=CC=C1	NC(C1=CN(CC2=CC=CC=C2)C=C(C(N)=O)C1)=O	[H]C(N(C)C)=O	O=C1C2=CC(C[Se]C3=CC=CC=C3)=CC=C2OCC4=CC=CC=C14	0.576807	2.4371	71.9883	115.173	63.6	268.268	268.074	4	1	2	1	3	0	4	20	32	0	0	3	2	0	1	0	0	1	2	0	0	0.125	10.6276	6.2507	4.67597	3.28911	2.3333	6.2507	4.67597	3.28911	2.3333	-2.62	12.4157	4.81063	2.15906	4.73686	16.8591
237	FC1(F)CCC(C(O)=O)CC1	C1([Se][Se]C2=CC=CC=C2)=CC=CC=C1	NC(C1=CN(CC2=CC=CC=C2)C=C(C(N)=O)C1C3=CC=CC=C3)=O	CC#N	FC1(F)CCC([Se]C2=CC=CC=C2)CC1	0.0410295	1.8965	34.5408	63.2099	37.3	164.151	164.065	2	1	1	1	1	0	4	11	21	0	0	1	0	1	1	0	0	0	0	1	1	0.857143	6.01717	3.61797	2.96846	2.06636	1.28709	3.61797	2.96846	2.06636	1.28709	-0.67	8.42681	2.75478	2.13307	0	16.9984
239	COC1=CC=C(CC(O)=O)C=C1	C1([Se][Se]C2=CC=CC=C2)=CC=CC=C1	NC(C1=CN(CC2=CC=C(C(F)(F)F)C=C2)C=CC1)=O	CC#N	COC1=CC=C(C[Se]C2=CC=CC=C2)C=C1	0.223141	1.3223	44.3338	70.5955	46.53	166.176	166.063	3	1	3	1	2	0	3	12	22	0	0	1	1	0	0	0	0	0	1	0	0	0.222222	6.78022	3.56858	2.41859	1.5144	0.918008	3.56858	2.41859	1.5144	0.918008	-1.51	8.58533	3.75887	2.26848	4.73686	18.1856
240	COC1=CC=C(CC(O)=O)C=C1	C1([Se][Se]C2=CC=CC=C2)=CC=CC=C1	NC(C1=CN(CC2=CC=CC=C2)C=C(C(N)=O)C1)=O	CC#N	COC1=CC=C(C[Se]C2=CC=CC=C2)C=C1	0.0272035	1.3223	44.3338	70.5955	46.53	166.176	166.063	3	1	3	1	2	0	3	12	22	0	0	1	1	0	0	0	0	0	1	0	0	0.222222	6.78022	3.56858	2.41859	1.5144	0.918008	3.56858	2.41859	1.5144	0.918008	-1.51	8.58533	3.75887	2.26848	4.73686	18.1856
242	O=C(C1CCOCC1)O	C1([Se][Se]C2=CC=CC=C2)=CC=CC=C1	NC(C1=CN(CC2=CC=CC=C2)C=C(C(N)=O)C1)=O	CC#N	C1([Se]C2=CC=CC=C2)CCOCC1	0	0.4976	31.1788	53.6274	46.53	130.143	130.063	3	1	1	1	2	0	3	9	19	0	0	1	0	1	1	0	1	1	0	0	0	0.833333	5.16949	3.11025	2.22488	1.57054	0.944535	3.11025	2.22488	1.57054	0.944535	-0.57	6.54862	2.82385	1.67686	0	24.2896
250	O=C1C2=CC(CC(O)=O)=CC=C2OCC3=CC=CC=C13	C1(C[Se][Se]CC2=CC=CC=C2)=CC=CC=C1	NC(C1=CN(CC2=CC=C(OC)C=C2)C=CC1)=O	CS(C)=O	O=C1C2=CC(C[Se]CC3=CC=CC=C3)=CC=C2OCC4=CC=CC=C14	0.283787	2.4371	71.9883	115.173	63.6	268.268	268.074	4	1	2	1	3	0	4	20	32	0	0	3	2	0	1	0	0	1	2	0	0	0.125	10.6276	6.2507	4.67597	3.28911	2.3333	6.2507	4.67597	3.28911	2.3333	-2.62	12.4157	4.81063	2.15906	4.73686	16.8591
253	CC(N(C(C1=C2C=CC=C1)=O)C2=O)C(O)=O	C1(C[Se][Se]CC2=CC=CC=C2)=CC=CC=C1	NC(C1=CN(CC2=CC=CC=C2)C=C(C(N)=O)C1C3=CC=CC=C3)=O	[H]C(N(C)C)=O	CC(N(C(C1=C2C=CC=C1)=O)C2=O)[Se]CC3=CC=CC=C3	0.134277	0.7557	54.0398	91.2889	74.68	219.196	219.053	5	1	2	1	3	2	5	16	25	1	1	2	1	0	1	0	0	1	1	0	0	0.181818	8.50592	4.73477	3.5401	2.57017	1.67007	4.73477	3.5401	2.57017	1.67007	-2.17	10.3513	3.44496	1.28736	0	33.8319
255	O=C(CCCC1=CNC2=C1C=CC=C2)O	C1(C[Se][Se]CC2=CC=CC=C2)=CC=CC=C1	NC(C1=CN(CC2=CC=CC=C2)C=C(C(N)=O)C1)=O	[H]C(N(C)C)=O	C1(CCC[Se]CC2=CC=CC=C2)=CNC3=C1C=CC=C3	0.0265027	2.5752	58.8725	87.7378	53.09	203.241	203.095	3	2	4	2	1	0	3	15	28	0	0	2	2	0	0	1	0	0	1	0	0	0.25	8.36353	5.03954	3.60679	2.51168	1.76852	5.03954	3.60679	2.51168	1.76852	-1.77	9.77244	4.17088	2.18007	0	16.0598
257	CC(N1C(C2=CC=C(Cl)C=C2)=O)=C(CC(O)=O)C3=C1C=CC(OC)=C3	C1(C[Se][Se]CC2=CC=CC=C2)=CC=CC=C1	NC(C1=CN(CC2=CC=CC=C2)C=C(C(N)=O)C1C3=CC=CC=C3)=O	[H]C(N(C)C)=O	CC(N1C(C2=CC=C(Cl)C=C2)=O)=C(C[Se]CC3=CC=CC=C3)C4=C1C=CC(OC)=C4	0.0386538	3.92732	95.7473	148.948	68.53	357.793	357.077	5	1	4	1	4	0	6	25	41	0	0	3	3	0	0	1	0	0	2	0	0	0.157895	14.5016	7.9985	6.10145	4.41613	3.07299	7.62054	5.66501	4.16415	2.947	-2.79	17.0467	6.60718	3.10467	4.73686	28.6599
265	CC(C1=CC=C(CC2C(CCC2)=O)C=C1)C(O)=O	C1(C[Se][Se]CC2=CC=CC=C2)=CC=CC=C1	NC(C1=CN(CC2=CC=CC=C2)C=CC1)=O	CC#N	CC(C1=CC=C(CC2C(CCC2)=O)C=C1)[Se]CC3=CC=CC=C3	0.002645	2.7864	68.5448	106.827	54.37	246.306	246.126	3	1	4	1	2	0	3	18	36	2	2	2	1	1	1	0	0	0	1	1	1	0.466667	10.5562	6.4202	5.0611	3.76335	2.47319	6.4202	5.0611	3.76335	2.47319	-1.64	12.8076	5.33759	2.78076	0	16.8591
267	O=C(C1CCCCC1)O	C1(C[Se][Se]CC2=CC=CC=C2)=CC=CC=C1	NC(C1=CN(CC2=CC=C(OC)C=C2)C=CC1)=O	CS(C)=O	C1([Se]CC2=CC=CC=C2)CCCCC1	0.0661424	1.6513	34.2108	54.8788	37.3	128.171	128.084	2	1	1	1	1	0	2	9	21	0	0	1	0	1	1	0	0	0	0	1	1	0.857143	5.46835	3.5329	2.67317	1.95441	1.34954	3.5329	2.67317	1.95441	1.34954	-0.53	6.58806	2.85257	1.6989	0	11.0758
270	O=C(OCC1=CC=CC=C1)[C@H](NC(OC(C)(C)C)=O)CC(O)=O	C1(C[Se][Se]CC2=CC=CC=C2)=CC=CC=C1	NC(C1=CN(CC2=CC=CC=C2)C=C(C(N)=O)C1)=O	CS(C)=O	O=C(OCC1=CC=CC=C1)[C@H](NC(OC(C)(C)C)=O)C[Se]CC2=CC=CC=C2	0.0158485	2.0978	81.6485	134.137	101.93	323.345	323.137	7	2	6	2	5	1	7	23	44	1	0	1	1	0	0	0	0	0	1	0	0	0.4375	13.3668	7.09042	5.88999	2.57815	1.64702	7.09042	5.88999	2.57815	1.64702	-2.57	18.4789	8.16525	7.84542	5.31679	34.7813
271	O=C(C1CCCCC1)O	C1(C[Se][Se]CC2=CC=CC=C2)=CC=CC=C1	NC(C1=CN(CC2=CC=CC=C2)C=CC1)=O	[H]C(N(C)C)=O	C1([Se]CC2=CC=CC=C2)CCCCC1	0.018108	1.6513	34.2108	54.8788	37.3	128.171	128.084	2	1	1	1	1	0	2	9	21	0	0	1	0	1	1	0	0	0	0	1	1	0.857143	5.46835	3.5329	2.67317	1.95441	1.34954	3.5329	2.67317	1.95441	1.34954	-0.53	6.58806	2.85257	1.6989	0	11.0758
275	O=C(OCC1=CC=CC=C1)[C@H](NC(OC(C)(C)C)=O)CC(O)=O	C1(C[Se][Se]CC2=CC=CC=C2)=CC=CC=C1	NC(C1=CN(CC2=CC=CC=C2)C=C(C(N)=O)C1)=O	[H]C(N(C)C)=O	O=C(OCC1=CC=CC=C1)[C@H](NC(OC(C)(C)C)=O)C[Se]CC2=CC=CC=C2	0.00546445	2.0978	81.6485	134.137	101.93	323.345	323.137	7	2	6	2	5	1	7	23	44	1	0	1	1	0	0	0	0	0	1	0	0	0.4375	13.3668	7.09042	5.88999	2.57815	1.64702	7.09042	5.88999	2.57815	1.64702	-2.57	18.4789	8.16525	7.84542	5.31679	34.7813
276	O=C(C1CCC1)O	C1(C[Se][Se]CC2=CC=CC=C2)=CC=CC=C1	NC(C1=CN(CC2=CC=C(C(F)(F)F)C=C2)C=CC1)=O	[H]C(N(C)C)=O	C1([Se]CC2=CC=CC=C2)CCC1	0.00397726	0.8711	24.9768	42.1489	37.3	100.117	100.052	2	1	1	1	1	0	2	7	15	0	0	1	0	1	1	0	0	0	0	1	1	0.8	4.05413	2.5329	1.96606	1.45441	0.655199	2.5329	1.96606	1.45441	0.655199	-0.53	4.62456	1.52348	0.734423	0	11.0758
280	CC(C1=CC=C2C=C(OC)C=CC2=C1)C(O)=O	C1(C[Se][Se]CC2=CC=CC=C2)=CC=CC=C1	NC(C1=CN(CC2=CC=CC=C2)C=C(C(N)=O)C1C3=CC=CC=C3)=O	[H]C(N(C)C)=O	CC(C1=CC=C2C=C(OC)C=CC2=C1)[Se]CC3=CC=CC=C3	0.0004975	3.0365	66.5508	99.6421	46.53	230.263	230.094	3	1	3	1	2	0	3	17	31	1	1	2	2	0	0	0	0	0	2	0	0	0.214286	9.80516	5.42087	4.03244	2.94189	1.78119	5.42087	4.03244	2.94189	1.78119	-2.03	11.4553	4.45404	2.22849	4.73686	18.1856
281	O=C(C1CCCCC1)O	C1(C[Se][Se]CC2=CC=CC=C2)=CC=CC=C1	NC(C1=CN(CC2=CC=C(OC)C=C2)C=CC1)=O	CC#N	C1([Se]CC2=CC=CC=C2)CCCCC1	0.0026164	1.6513	34.2108	54.8788	37.3	128.171	128.084	2	1	1	1	1	0	2	9	21	0	0	1	0	1	1	0	0	0	0	1	1	0.857143	5.46835	3.5329	2.67317	1.95441	1.34954	3.5329	2.67317	1.95441	1.34954	-0.53	6.58806	2.85257	1.6989	0	11.0758
299	O=C(CCCC1=CNC2=C1C=CC=C2)O	CC[Se][Se]CC	NC(C1=CN(CC2=CC=CC=C2)C=CC1)=O	CC#N	CC[Se]CCCC1=CNC2=C1C=CC=C2	0.0272609	2.5752	58.8725	87.7378	53.09	203.241	203.095	3	2	4	2	1	0	3	15	28	0	0	2	2	0	0	1	0	0	1	0	0	0.25	8.36353	5.03954	3.60679	2.51168	1.76852	5.03954	3.60679	2.51168	1.76852	-1.77	9.77244	4.17088	2.18007	0	16.0598
304	CC(N1C(C2=CC=C(Cl)C=C2)=O)=C(CC(O)=O)C3=C1C=CC(OC)=C3	CC[Se][Se]CC	NC(C1=CN(CC2=CC=CC=C2)C=C(C(N)=O)C1)=O	CC#N	CC(N1C(C2=CC=C(Cl)C=C2)=O)=C(C[Se]CC)C3=C1C=CC(OC)=C3	0	3.92732	95.7473	148.948	68.53	357.793	357.077	5	1	4	1	4	0	6	25	41	0	0	3	3	0	0	1	0	0	2	0	0	0.157895	14.5016	7.9985	6.10145	4.41613	3.07299	7.62054	5.66501	4.16415	2.947	-2.79	17.0467	6.60718	3.10467	4.73686	28.6599
311	BrC1=CC=C(CC(O)=O)C=C1	CC[Se][Se]CC	NC(C1=CN(CC2=CC=CC=C2)C=C(C(N)=O)C1)=O	[H]C(N(C)C)=O	BrC1=CC=C(C[Se]CC)C=C1	0	2.0762	45.4818	72.9846	37.3	215.046	213.963	2	1	2	1	1	0	3	11	18	0	0	1	1	0	0	0	0	0	1	0	0	0.125	7.33593	3.93819	3.11266	1.79727	1.04121	3.14519	2.19698	1.26861	0.776878	-0.83	8.26833	3.52892	2.71792	0	11.0758
312	CC1=C(CC(O)=O)C=CC=C1	CC[Se][Se]CC	NC(C1=CN(CC2=CC=C(C(F)(F)F)C=C2)C=CC1)=O	[H]C(N(C)C)=O	CC1=C(C[Se]CC)C=CC=C1	0.00813	1.62212	42.5188	65.482	37.3	150.177	150.068	2	1	2	1	1	0	2	11	21	0	0	1	1	0	0	0	0	0	1	0	0	0.222222	6.37197	3.46219	2.497	1.60293	0.971355	3.46219	2.497	1.60293	0.971355	-1.31	7.7932	3.19116	2.07522	0	11.0758
313	O=C(CC1=CNC2=C1C=CC=C2)O	CC[Se][Se]CC	NC(C1=CN(CC2=CC=C(OC)C=C2)C=CC1)=O	[H]C(N(C)C)=O	CC[Se]CC1=CNC2=C1C=CC=C2	0.03255	1.795	49.6385	75.0079	53.09	175.187	175.063	3	2	2	2	1	0	3	13	22	0	0	2	2	0	0	1	0	0	1	0	0	0.1	6.94932	4.03954	2.93001	2.0166	1.44079	4.03954	2.93001	2.0166	1.44079	-1.77	7.85739	2.93568	1.40216	0	16.0598
317	COC1=CC=C(CC(O)=O)C=C1	CC[Se][Se]CC	NC(C1=CN(CC2=CC=C(C(F)(F)F)C=C2)C=CC1)=O	CC#N	COC1=CC=C(C[Se]CC)C=C1	0.0652688	1.3223	44.3338	70.5955	46.53	166.176	166.063	3	1	3	1	2	0	3	12	22	0	0	1	1	0	0	0	0	0	1	0	0	0.222222	6.78022	3.56858	2.41859	1.5144	0.918008	3.56858	2.41859	1.5144	0.918008	-1.51	8.58533	3.75887	2.26848	4.73686	18.1856
322	COC1=CC=C(CC(O)=O)C=C1	C1([Se][Se]C2=CC=CC=C2)=CC=CC=C1	NC(C1=CN(CC2=CC=C(C(F)(F)F)C=C2)C=CC1)=O	CS(C)=O	COC1=CC=C(C[Se]C2=CC=CC=C2)C=C1	0.160976	1.3223	44.3338	70.5955	46.53	166.176	166.063	3	1	3	1	2	0	3	12	22	0	0	1	1	0	0	0	0	0	1	0	0	0.222222	6.78022	3.56858	2.41859	1.5144	0.918008	3.56858	2.41859	1.5144	0.918008	-1.51	8.58533	3.75887	2.26848	4.73686	18.1856
329	O=C(C1CCC1)O	C1([Se][Se]C2=CC=CC=C2)=CC=CC=C1	NC(C1=CN(CC2=CC=CC=C2)C=C(C(N)=O)C1)=O	CS(C)=O	C1([Se]C2=CC=CC=C2)CCC1	0.595057	0.8711	24.9768	42.1489	37.3	100.117	100.052	2	1	1	1	1	0	2	7	15	0	0	1	0	1	1	0	0	0	0	1	1	0.8	4.05413	2.5329	1.96606	1.45441	0.655199	2.5329	1.96606	1.45441	0.655199	-0.53	4.62456	1.52348	0.734423	0	11.0758
340	CC1=C(CC(O)=O)C=CC=C1	C1([Se][Se]C2=CC=CC=C2)=CC=CC=C1	NC(C1=CN(CC2=CC=CC=C2)C=C(C(N)=O)C1)=O	[H]C(N(C)C)=O	CC1=C(C[Se]C2=CC=CC=C2)C=CC=C1	0.405827	1.62212	42.5188	65.482	37.3	150.177	150.068	2	1	2	1	1	0	2	11	21	0	0	1	1	0	0	0	0	0	1	0	0	0.222222	6.37197	3.46219	2.497	1.60293	0.971355	3.46219	2.497	1.60293	0.971355	-1.31	7.7932	3.19116	2.07522	0	11.0758
362	CC1=CC=C(S(N2CCC(C(O)=O)CC2)(=O)=O)C=C1	C1(C[Se][Se]CC2=CC=CC=C2)=CC=CC=C1	NC(C1=CN(CC2=CC=CC=C2)C=CC1)=O	CS(C)=O	CC1=CC=C(S(N2CCC([Se]CC3=CC=CC=C3)CC2)(=O)=O)C=C1	0.13955	1.48032	70.2976	112.457	74.68	283.349	283.088	5	1	3	1	3	0	6	19	36	0	0	2	1	1	1	0	1	1	1	0	0	0.461538	11.5591	7.64682	6.76758	5.37479	3.67212	6.20676	4.82965	3.46193	2.20242	-1.4	14.0185	5.30321	2.95571	0	36.8884
365	CC(C1=CC=C(CC2C(CCC2)=O)C=C1)C(O)=O	C1(C[Se][Se]CC2=CC=CC=C2)=CC=CC=C1	NC(C1=CN(CC2=CC=CC=C2)C=CC1)=O	[H]C(N(C)C)=O	CC(C1=CC=C(CC2C(CCC2)=O)C=C1)[Se]CC3=CC=CC=C3	0.125342	2.7864	68.5448	106.827	54.37	246.306	246.126	3	1	4	1	2	0	3	18	36	2	2	2	1	1	1	0	0	0	1	1	1	0.466667	10.5562	6.4202	5.0611	3.76335	2.47319	6.4202	5.0611	3.76335	2.47319	-1.64	12.8076	5.33759	2.78076	0	16.8591
368	CC(N1C(C2=CC=C(Cl)C=C2)=O)=C(CC(O)=O)C3=C1C=CC(OC)=C3	C1(C[Se][Se]CC2=CC=CC=C2)=CC=CC=C1	NC(C1=CN(CC2=CC=C(C(F)(F)F)C=C2)C=CC1)=O	[H]C(N(C)C)=O	CC(N1C(C2=CC=C(Cl)C=C2)=O)=C(C[Se]CC3=CC=CC=C3)C4=C1C=CC(OC)=C4	0.0016806	3.92732	95.7473	148.948	68.53	357.793	357.077	5	1	4	1	4	0	6	25	41	0	0	3	3	0	0	1	0	0	2	0	0	0.157895	14.5016	7.9985	6.10145	4.41613	3.07299	7.62054	5.66501	4.16415	2.947	-2.79	17.0467	6.60718	3.10467	4.73686	28.6599
389	O=C1C2=CC(CC(O)=O)=CC=C2OCC3=CC=CC=C13	CC[Se][Se]CC	NC(C1=CN(CC2=CC=CC=C2)C=CC1)=O	CS(C)=O	O=C1C2=CC(C[Se]CC)=CC=C2OCC3=CC=CC=C13	0.0111798	2.4371	71.9883	115.173	63.6	268.268	268.074	4	1	2	1	3	0	4	20	32	0	0	3	2	0	1	0	0	1	2	0	0	0.125	10.6276	6.2507	4.67597	3.28911	2.3333	6.2507	4.67597	3.28911	2.3333	-2.62	12.4157	4.81063	2.15906	4.73686	16.8591
402	CC(N1C(C2=CC=C(Cl)C=C2)=O)=C(CC(O)=O)C3=C1C=CC(OC)=C3	CC[Se][Se]CC	NC(C1=CN(CC2=CC=CC=C2)C=CC1)=O	CC#N	CC(N1C(C2=CC=C(Cl)C=C2)=O)=C(C[Se]CC)C3=C1C=CC(OC)=C3	0	3.92732	95.7473	148.948	68.53	357.793	357.077	5	1	4	1	4	0	6	25	41	0	0	3	3	0	0	1	0	0	2	0	0	0.157895	14.5016	7.9985	6.10145	4.41613	3.07299	7.62054	5.66501	4.16415	2.947	-2.79	17.0467	6.60718	3.10467	4.73686	28.6599
405	BrC1=CC=C(CC(O)=O)C=C1	CC[Se][Se]CC	NC(C1=CN(CC2=CC=CC=C2)C=C(C(N)=O)C1C3=CC=CC=C3)=O	CS(C)=O	BrC1=CC=C(C[Se]CC)C=C1	0.000769	2.0762	45.4818	72.9846	37.3	215.046	213.963	2	1	2	1	1	0	3	11	18	0	0	1	1	0	0	0	0	0	1	0	0	0.125	7.33593	3.93819	3.11266	1.79727	1.04121	3.14519	2.19698	1.26861	0.776878	-0.83	8.26833	3.52892	2.71792	0	11.0758
411	COC1=CC=C(CC(O)=O)C=C1	CC[Se][Se]CC	NC(C1=CN(CC2=CC=CC=C2)C=C(C(N)=O)C1C3=CC=CC=C3)=O	[H]C(N(C)C)=O	COC1=CC=C(C[Se]CC)C=C1	0.043808	1.3223	44.3338	70.5955	46.53	166.176	166.063	3	1	3	1	2	0	3	12	22	0	0	1	1	0	0	0	0	0	1	0	0	0.222222	6.78022	3.56858	2.41859	1.5144	0.918008	3.56858	2.41859	1.5144	0.918008	-1.51	8.58533	3.75887	2.26848	4.73686	18.1856
419	CC1=C(CC(O)=O)C=CC=C1	CC[Se][Se]CC	NC(C1=CN(CC2=CC=CC=C2)C=C(C(N)=O)C1C3=CC=CC=C3)=O	CC#N	CC1=C(C[Se]CC)C=CC=C1	0	1.62212	42.5188	65.482	37.3	150.177	150.068	2	1	2	1	1	0	2	11	21	0	0	1	1	0	0	0	0	0	1	0	0	0.222222	6.37197	3.46219	2.497	1.60293	0.971355	3.46219	2.497	1.60293	0.971355	-1.31	7.7932	3.19116	2.07522	0	11.0758
429	CC1=C(CC(O)=O)C=CC=C1	C1([Se][Se]C2=CC=CC=C2)=CC=CC=C1	NC(C1=CN(CC2=CC=CC=C2)C=C(C(N)=O)C1)=O	CS(C)=O	CC1=C(C[Se]C2=CC=CC=C2)C=CC=C1	0.2063	1.62212	42.5188	65.482	37.3	150.177	150.068	2	1	2	1	1	0	2	11	21	0	0	1	1	0	0	0	0	0	1	0	0	0.222222	6.37197	3.46219	2.497	1.60293	0.971355	3.46219	2.497	1.60293	0.971355	-1.31	7.7932	3.19116	2.07522	0	11.0758
436	O=C(C1CCC1)O	C1([Se][Se]C2=CC=CC=C2)=CC=CC=C1	NC(C1=CN(CC2=CC=C(C(F)(F)F)C=C2)C=CC1)=O	CS(C)=O	C1([Se]C2=CC=CC=C2)CCC1	0.68023	0.8711	24.9768	42.1489	37.3	100.117	100.052	2	1	1	1	1	0	2	7	15	0	0	1	0	1	1	0	0	0	0	1	1	0.8	4.05413	2.5329	1.96606	1.45441	0.655199	2.5329	1.96606	1.45441	0.655199	-0.53	4.62456	1.52348	0.734423	0	11.0758
438	CC(C1=CC=C2C=C(OC)C=CC2=C1)C(O)=O	C1([Se][Se]C2=CC=CC=C2)=CC=CC=C1	NC(C1=CN(CC2=CC=CC=C2)C=C(C(N)=O)C1C3=CC=CC=C3)=O	CS(C)=O	CC(C1=CC=C2C=C(OC)C=CC2=C1)[Se]C3=CC=CC=C3	0.318711	3.0365	66.5508	99.6421	46.53	230.263	230.094	3	1	3	1	2	0	3	17	31	1	1	2	2	0	0	0	0	0	2	0	0	0.214286	9.80516	5.42087	4.03244	2.94189	1.78119	5.42087	4.03244	2.94189	1.78119	-2.03	11.4553	4.45404	2.22849	4.73686	18.1856
441	O=C(CCCC1=CNC2=C1C=CC=C2)O	C1([Se][Se]C2=CC=CC=C2)=CC=CC=C1	NC(C1=CN(CC2=CC=C(C(F)(F)F)C=C2)C=CC1)=O	[H]C(N(C)C)=O	C1(CCC[Se]C2=CC=CC=C2)=CNC3=C1C=CC=C3	0.629424	2.5752	58.8725	87.7378	53.09	203.241	203.095	3	2	4	2	1	0	3	15	28	0	0	2	2	0	0	1	0	0	1	0	0	0.25	8.36353	5.03954	3.60679	2.51168	1.76852	5.03954	3.60679	2.51168	1.76852	-1.77	9.77244	4.17088	2.18007	0	16.0598
452	CC(C1=CC=C2C=C(OC)C=CC2=C1)C(O)=O	C1([Se][Se]C2=CC=CC=C2)=CC=CC=C1	NC(C1=CN(CC2=CC=C(OC)C=C2)C=CC1)=O	[H]C(N(C)C)=O	CC(C1=CC=C2C=C(OC)C=CC2=C1)[Se]C3=CC=CC=C3	0.605574	3.0365	66.5508	99.6421	46.53	230.263	230.094	3	1	3	1	2	0	3	17	31	1	1	2	2	0	0	0	0	0	2	0	0	0.214286	9.80516	5.42087	4.03244	2.94189	1.78119	5.42087	4.03244	2.94189	1.78119	-2.03	11.4553	4.45404	2.22849	4.73686	18.1856
463	O=C(CCCC1=CNC2=C1C=CC=C2)O	C1(C[Se][Se]CC2=CC=CC=C2)=CC=CC=C1	NC(C1=CN(CC2=CC=CC=C2)C=C(C(N)=O)C1C3=CC=CC=C3)=O	CS(C)=O	C1(CCC[Se]CC2=CC=CC=C2)=CNC3=C1C=CC=C3	0.0219828	2.5752	58.8725	87.7378	53.09	203.241	203.095	3	2	4	2	1	0	3	15	28	0	0	2	2	0	0	1	0	0	1	0	0	0.25	8.36353	5.03954	3.60679	2.51168	1.76852	5.03954	3.60679	2.51168	1.76852	-1.77	9.77244	4.17088	2.18007	0	16.0598
467	CC(N1C(C2=CC=C(Cl)C=C2)=O)=C(CC(O)=O)C3=C1C=CC(OC)=C3	C1(C[Se][Se]CC2=CC=CC=C2)=CC=CC=C1	NC(C1=CN(CC2=CC=C(OC)C=C2)C=CC1)=O	CS(C)=O	CC(N1C(C2=CC=C(Cl)C=C2)=O)=C(C[Se]CC3=CC=CC=C3)C4=C1C=CC(OC)=C4	0.146739	3.92732	95.7473	148.948	68.53	357.793	357.077	5	1	4	1	4	0	6	25	41	0	0	3	3	0	0	1	0	0	2	0	0	0.157895	14.5016	7.9985	6.10145	4.41613	3.07299	7.62054	5.66501	4.16415	2.947	-2.79	17.0467	6.60718	3.10467	4.73686	28.6599
479	O=C1C2=CC(CC(O)=O)=CC=C2OCC3=CC=CC=C13	C1(C[Se][Se]CC2=CC=CC=C2)=CC=CC=C1	NC(C1=CN(CC2=CC=C(C(F)(F)F)C=C2)C=CC1)=O	CC#N	O=C1C2=CC(C[Se]CC3=CC=CC=C3)=CC=C2OCC4=CC=CC=C14	0.347378	2.4371	71.9883	115.173	63.6	268.268	268.074	4	1	2	1	3	0	4	20	32	0	0	3	2	0	1	0	0	1	2	0	0	0.125	10.6276	6.2507	4.67597	3.28911	2.3333	6.2507	4.67597	3.28911	2.3333	-2.62	12.4157	4.81063	2.15906	4.73686	16.8591
480	O=C1C2=CC(CC(O)=O)=CC=C2OCC3=CC=CC=C13	C1(C[Se][Se]CC2=CC=CC=C2)=CC=CC=C1	NC(C1=CN(CC2=CC=CC=C2)C=C(C(N)=O)C1)=O	CC#N	O=C1C2=CC(C[Se]CC3=CC=CC=C3)=CC=C2OCC4=CC=CC=C14	0.344861	2.4371	71.9883	115.173	63.6	268.268	268.074	4	1	2	1	3	0	4	20	32	0	0	3	2	0	1	0	0	1	2	0	0	0.125	10.6276	6.2507	4.67597	3.28911	2.3333	6.2507	4.67597	3.28911	2.3333	-2.62	12.4157	4.81063	2.15906	4.73686	16.8591
494	O=C(OCC1=CC=CC=C1)[C@H](NC(OC(C)(C)C)=O)CC(O)=O	C1(C[Se][Se]CC2=CC=CC=C2)=CC=CC=C1	NC(C1=CN(CC2=CC=CC=C2)C=C(C(N)=O)C1C3=CC=CC=C3)=O	CC#N	O=C(OCC1=CC=CC=C1)[C@H](NC(OC(C)(C)C)=O)C[Se]CC2=CC=CC=C2	0.0129873	2.0978	81.6485	134.137	101.93	323.345	323.137	7	2	6	2	5	1	7	23	44	1	0	1	1	0	0	0	0	0	1	0	0	0.4375	13.3668	7.09042	5.88999	2.57815	1.64702	7.09042	5.88999	2.57815	1.64702	-2.57	18.4789	8.16525	7.84542	5.31679	34.7813
499	CC1=CC=C(S(N2CCC(C(O)=O)CC2)(=O)=O)C=C1	CC[Se][Se]CC	NC(C1=CN(CC2=CC=CC=C2)C=CC1)=O	CS(C)=O	CC1=CC=C(S(N2CCC([Se]CC)CC2)(=O)=O)C=C1	0.321125	1.48032	70.2976	112.457	74.68	283.349	283.088	5	1	3	1	3	0	6	19	36	0	0	2	1	1	1	0	1	1	1	0	0	0.461538	11.5591	7.64682	6.76758	5.37479	3.67212	6.20676	4.82965	3.46193	2.20242	-1.4	14.0185	5.30321	2.95571	0	36.8884
503	O=C1C2=CC(CC(O)=O)=CC=C2OCC3=CC=CC=C13	CC[Se][Se]CC	NC(C1=CN(CC2=CC=CC=C2)C=C(C(N)=O)C1)=O	CS(C)=O	O=C1C2=CC(C[Se]CC)=CC=C2OCC3=CC=CC=C13	0.0018633	2.4371	71.9883	115.173	63.6	268.268	268.074	4	1	2	1	3	0	4	20	32	0	0	3	2	0	1	0	0	1	2	0	0	0.125	10.6276	6.2507	4.67597	3.28911	2.3333	6.2507	4.67597	3.28911	2.3333	-2.62	12.4157	4.81063	2.15906	4.73686	16.8591
504	O=C1C2=CC(CC(O)=O)=CC=C2OCC3=CC=CC=C13	CC[Se][Se]CC	NC(C1=CN(CC2=CC=CC=C2)C=C(C(N)=O)C1C3=CC=CC=C3)=O	CS(C)=O	O=C1C2=CC(C[Se]CC)=CC=C2OCC3=CC=CC=C13	0	2.4371	71.9883	115.173	63.6	268.268	268.074	4	1	2	1	3	0	4	20	32	0	0	3	2	0	1	0	0	1	2	0	0	0.125	10.6276	6.2507	4.67597	3.28911	2.3333	6.2507	4.67597	3.28911	2.3333	-2.62	12.4157	4.81063	2.15906	4.73686	16.8591
509	CC1=CC=C(S(N2CCC(C(O)=O)CC2)(=O)=O)C=C1	CC[Se][Se]CC	NC(C1=CN(CC2=CC=CC=C2)C=C(C(N)=O)C1)=O	[H]C(N(C)C)=O	CC1=CC=C(S(N2CCC([Se]CC)CC2)(=O)=O)C=C1	0	1.48032	70.2976	112.457	74.68	283.349	283.088	5	1	3	1	3	0	6	19	36	0	0	2	1	1	1	0	1	1	1	0	0	0.461538	11.5591	7.64682	6.76758	5.37479	3.67212	6.20676	4.82965	3.46193	2.20242	-1.4	14.0185	5.30321	2.95571	0	36.8884
510	CC1=CC=C(S(N2CCC(C(O)=O)CC2)(=O)=O)C=C1	CC[Se][Se]CC	NC(C1=CN(CC2=CC=CC=C2)C=C(C(N)=O)C1C3=CC=CC=C3)=O	[H]C(N(C)C)=O	CC1=CC=C(S(N2CCC([Se]CC)CC2)(=O)=O)C=C1	0	1.48032	70.2976	112.457	74.68	283.349	283.088	5	1	3	1	3	0	6	19	36	0	0	2	1	1	1	0	1	1	1	0	0	0.461538	11.5591	7.64682	6.76758	5.37479	3.67212	6.20676	4.82965	3.46193	2.20242	-1.4	14.0185	5.30321	2.95571	0	36.8884
518	CC(C1=CC=C(CC2C(CCC2)=O)C=C1)C(O)=O	CC[Se][Se]CC	NC(C1=CN(CC2=CC=CC=C2)C=C(C(N)=O)C1C3=CC=CC=C3)=O	CC#N	CC(C1=CC=C(CC2C(CCC2)=O)C=C1)[Se]CC	0.019768	2.7864	68.5448	106.827	54.37	246.306	246.126	3	1	4	1	2	0	3	18	36	2	2	2	1	1	1	0	0	0	1	1	1	0.466667	10.5562	6.4202	5.0611	3.76335	2.47319	6.4202	5.0611	3.76335	2.47319	-1.64	12.8076	5.33759	2.78076	0	16.8591
522	CC1=C(CC(O)=O)C=CC=C1	CC[Se][Se]CC	NC(C1=CN(CC2=CC=C(C(F)(F)F)C=C2)C=CC1)=O	CS(C)=O	CC1=C(C[Se]CC)C=CC=C1	0.404702	1.62212	42.5188	65.482	37.3	150.177	150.068	2	1	2	1	1	0	2	11	21	0	0	1	1	0	0	0	0	0	1	0	0	0.222222	6.37197	3.46219	2.497	1.60293	0.971355	3.46219	2.497	1.60293	0.971355	-1.31	7.7932	3.19116	2.07522	0	11.0758
524	BrC1=CC=C(CC(O)=O)C=C1	CC[Se][Se]CC	NC(C1=CN(CC2=CC=CC=C2)C=CC1)=O	[H]C(N(C)C)=O	BrC1=CC=C(C[Se]CC)C=C1	0	2.0762	45.4818	72.9846	37.3	215.046	213.963	2	1	2	1	1	0	3	11	18	0	0	1	1	0	0	0	0	0	1	0	0	0.125	7.33593	3.93819	3.11266	1.79727	1.04121	3.14519	2.19698	1.26861	0.776878	-0.83	8.26833	3.52892	2.71792	0	11.0758
525	BrC1=CC=C(CC(O)=O)C=C1	CC[Se][Se]CC	NC(C1=CN(CC2=CC=C(OC)C=C2)C=CC1)=O	[H]C(N(C)C)=O	BrC1=CC=C(C[Se]CC)C=C1	0	2.0762	45.4818	72.9846	37.3	215.046	213.963	2	1	2	1	1	0	3	11	18	0	0	1	1	0	0	0	0	0	1	0	0	0.125	7.33593	3.93819	3.11266	1.79727	1.04121	3.14519	2.19698	1.26861	0.776878	-0.83	8.26833	3.52892	2.71792	0	11.0758
529	CC1=CC=C(CC(O)=O)C=C1	CC[Se][Se]CC	NC(C1=CN(CC2=CC=C(OC)C=C2)C=CC1)=O	CC#N	CC1=CC=C(C[Se]CC)C=C1	0	1.62212	42.5188	65.482	37.3	150.177	150.068	2	1	2	1	1	0	2	11	21	0	0	1	1	0	0	0	0	0	1	0	0	0.222222	6.37197	3.4562	2.55611	1.47595	0.880551	3.4562	2.55611	1.47595	0.880551	-1.31	7.7932	3.19116	2.41518	0	11.0758
3	O=C(CCCC1=CNC2=C1C=CC=C2)O	C1([Se][Se]C2=CC=CC=C2)=CC=CC=C1	NC(C1=CN(CC2=CC=C(C(F)(F)F)C=C2)C=CC1)=O	CS(C)=O	C1(CCC[Se]C2=CC=CC=C2)=CNC3=C1C=CC=C3	0.726506	2.5752	58.8725	87.7378	53.09	203.241	203.095	3	2	4	2	1	0	3	15	28	0	0	2	2	0	0	1	0	0	1	0	0	0.25	8.36353	5.03954	3.60679	2.51168	1.76852	5.03954	3.60679	2.51168	1.76852	-1.77	9.77244	4.17088	2.18007	0	16.0598
8	O=C1C2=CC(CC(O)=O)=CC=C2OCC3=CC=CC=C13	C1([Se][Se]C2=CC=CC=C2)=CC=CC=C1	NC(C1=CN(CC2=CC=CC=C2)C=CC1)=O	CS(C)=O	O=C1C2=CC(C[Se]C3=CC=CC=C3)=CC=C2OCC4=CC=CC=C14	0.769537	2.4371	71.9883	115.173	63.6	268.268	268.074	4	1	2	1	3	0	4	20	32	0	0	3	2	0	1	0	0	1	2	0	0	0.125	10.6276	6.2507	4.67597	3.28911	2.3333	6.2507	4.67597	3.28911	2.3333	-2.62	12.4157	4.81063	2.15906	4.73686	16.8591
14	O=C(C1(C2=CC=CC=C2)CC1)O	C1([Se][Se]C2=CC=CC=C2)=CC=CC=C1	NC(C1=CN(CC2=CC=C(C(F)(F)F)C=C2)C=CC1)=O	CS(C)=O	C1(C2([Se]C3=CC=CC=C3)CC2)=CC=CC=C1	0.651262	1.8028	44.9898	70.8411	37.3	162.188	162.068	2	1	2	1	1	0	2	12	22	0	0	2	1	1	1	0	0	0	1	1	1	0.3	6.65643	4.04552	3.25328	2.48576	1.5082	4.04552	3.25328	2.48576	1.5082	-1.31	7.34508	2.33834	0.915677	0	11.0758
23	COC1=CC=C(CC(O)=O)C=C1	C1([Se][Se]C2=CC=CC=C2)=CC=CC=C1	NC(C1=CN(CC2=CC=CC=C2)C=C(C(N)=O)C1C3=CC=CC=C3)=O	[H]C(N(C)C)=O	COC1=CC=C(C[Se]C2=CC=CC=C2)C=C1	0.302455	1.3223	44.3338	70.5955	46.53	166.176	166.063	3	1	3	1	2	0	3	12	22	0	0	1	1	0	0	0	0	0	1	0	0	0.222222	6.78022	3.56858	2.41859	1.5144	0.918008	3.56858	2.41859	1.5144	0.918008	-1.51	8.58533	3.75887	2.26848	4.73686	18.1856
25	O=C(C1CCOCC1)O	C1([Se][Se]C2=CC=CC=C2)=CC=CC=C1	NC(C1=CN(CC2=CC=C(C(F)(F)F)C=C2)C=CC1)=O	[H]C(N(C)C)=O	C1([Se]C2=CC=CC=C2)CCOCC1	0.763302	0.4976	31.1788	53.6274	46.53	130.143	130.063	3	1	1	1	2	0	3	9	19	0	0	1	0	1	1	0	1	1	0	0	0	0.833333	5.16949	3.11025	2.22488	1.57054	0.944535	3.11025	2.22488	1.57054	0.944535	-0.57	6.54862	2.82385	1.67686	0	24.2896
27	O=C(C1CCC1)O	C1([Se][Se]C2=CC=CC=C2)=CC=CC=C1	NC(C1=CN(CC2=CC=C(OC)C=C2)C=CC1)=O	[H]C(N(C)C)=O	C1([Se]C2=CC=CC=C2)CCC1	0.640482	0.8711	24.9768	42.1489	37.3	100.117	100.052	2	1	1	1	1	0	2	7	15	0	0	1	0	1	1	0	0	0	0	1	1	0.8	4.05413	2.5329	1.96606	1.45441	0.655199	2.5329	1.96606	1.45441	0.655199	-0.53	4.62456	1.52348	0.734423	0	11.0758
29	O=C(C1CCC1)O	C1([Se][Se]C2=CC=CC=C2)=CC=CC=C1	NC(C1=CN(CC2=CC=CC=C2)C=C(C(N)=O)C1C3=CC=CC=C3)=O	[H]C(N(C)C)=O	C1([Se]C2=CC=CC=C2)CCC1	0.483041	0.8711	24.9768	42.1489	37.3	100.117	100.052	2	1	1	1	1	0	2	7	15	0	0	1	0	1	1	0	0	0	0	1	1	0.8	4.05413	2.5329	1.96606	1.45441	0.655199	2.5329	1.96606	1.45441	0.655199	-0.53	4.62456	1.52348	0.734423	0	11.0758
33	O=C(CCCC1=CNC2=C1C=CC=C2)O	C1([Se][Se]C2=CC=CC=C2)=CC=CC=C1	NC(C1=CN(CC2=CC=C(OC)C=C2)C=CC1)=O	CC#N	C1(CCC[Se]C2=CC=CC=C2)=CNC3=C1C=CC=C3	0.667359	2.5752	58.8725	87.7378	53.09	203.241	203.095	3	2	4	2	1	0	3	15	28	0	0	2	2	0	0	1	0	0	1	0	0	0.25	8.36353	5.03954	3.60679	2.51168	1.76852	5.03954	3.60679	2.51168	1.76852	-1.77	9.77244	4.17088	2.18007	0	16.0598
46	O=C(OCC1=CC=CC=C1)[C@H](NC(OC(C)(C)C)=O)CC(O)=O	C1([Se][Se]C2=CC=CC=C2)=CC=CC=C1	NC(C1=CN(CC2=CC=CC=C2)C=CC1)=O	CC#N	O=C(OCC1=CC=CC=C1)[C@H](NC(OC(C)(C)C)=O)C[Se]C2=CC=CC=C2	0.752062	2.0978	81.6485	134.137	101.93	323.345	323.137	7	2	6	2	5	1	7	23	44	1	0	1	1	0	0	0	0	0	1	0	0	0.4375	13.3668	7.09042	5.88999	2.57815	1.64702	7.09042	5.88999	2.57815	1.64702	-2.57	18.4789	8.16525	7.84542	5.31679	34.7813
51	O=C(CCCC1=CNC2=C1C=CC=C2)O	C1(C[Se][Se]CC2=CC=CC=C2)=CC=CC=C1	NC(C1=CN(CC2=CC=C(C(F)(F)F)C=C2)C=CC1)=O	CS(C)=O	C1(CCC[Se]CC2=CC=CC=C2)=CNC3=C1C=CC=C3	0.0768673	2.5752	58.8725	87.7378	53.09	203.241	203.095	3	2	4	2	1	0	3	15	28	0	0	2	2	0	0	1	0	0	1	0	0	0.25	8.36353	5.03954	3.60679	2.51168	1.76852	5.03954	3.60679	2.51168	1.76852	-1.77	9.77244	4.17088	2.18007	0	16.0598
64	CC(N1C(C2=CC=C(Cl)C=C2)=O)=C(CC(O)=O)C3=C1C=CC(OC)=C3	C1(C[Se][Se]CC2=CC=CC=C2)=CC=CC=C1	NC(C1=CN(CC2=CC=CC=C2)C=C(C(N)=O)C1C3=CC=CC=C3)=O	CC#N	CC(N1C(C2=CC=C(Cl)C=C2)=O)=C(C[Se]CC3=CC=CC=C3)C4=C1C=CC(OC)=C4	0	3.92732	95.7473	148.948	68.53	357.793	357.077	5	1	4	1	4	0	6	25	41	0	0	3	3	0	0	1	0	0	2	0	0	0.157895	14.5016	7.9985	6.10145	4.41613	3.07299	7.62054	5.66501	4.16415	2.947	-2.79	17.0467	6.60718	3.10467	4.73686	28.6599
75	O=C(C1CCC1)O	C1(C[Se][Se]CC2=CC=CC=C2)=CC=CC=C1	NC(C1=CN(CC2=CC=CC=C2)C=C(C(N)=O)C1)=O	CC#N	C1([Se]CC2=CC=CC=C2)CCC1	0.0145459	0.8711	24.9768	42.1489	37.3	100.117	100.052	2	1	1	1	1	0	2	7	15	0	0	1	0	1	1	0	0	0	0	1	1	0.8	4.05413	2.5329	1.96606	1.45441	0.655199	2.5329	1.96606	1.45441	0.655199	-0.53	4.62456	1.52348	0.734423	0	11.0758
77	CC(N(C(C1=C2C=CC=C1)=O)C2=O)C(O)=O	CC[Se][Se]CC	NC(C1=CN(CC2=CC=C(OC)C=C2)C=CC1)=O	CS(C)=O	CC(N(C(C1=C2C=CC=C1)=O)C2=O)[Se]CC	0	0.7557	54.0398	91.2889	74.68	219.196	219.053	5	1	2	1	3	2	5	16	25	1	1	2	1	0	1	0	0	1	1	0	0	0.181818	8.50592	4.73477	3.5401	2.57017	1.67007	4.73477	3.5401	2.57017	1.67007	-2.17	10.3513	3.44496	1.28736	0	33.8319
78	O=C(CCCC1=CNC2=C1C=CC=C2)O	CC[Se][Se]CC	NC(C1=CN(CC2=CC=CC=C2)C=CC1)=O	CS(C)=O	CC[Se]CCCC1=CNC2=C1C=CC=C2	0.435427	2.5752	58.8725	87.7378	53.09	203.241	203.095	3	2	4	2	1	0	3	15	28	0	0	2	2	0	0	1	0	0	1	0	0	0.25	8.36353	5.03954	3.60679	2.51168	1.76852	5.03954	3.60679	2.51168	1.76852	-1.77	9.77244	4.17088	2.18007	0	16.0598
81	CC(C1=CC=C(CC2C(CCC2)=O)C=C1)C(O)=O	CC[Se][Se]CC	NC(C1=CN(CC2=CC=CC=C2)C=C(C(N)=O)C1C3=CC=CC=C3)=O	CS(C)=O	CC(C1=CC=C(CC2C(CCC2)=O)C=C1)[Se]CC	0.0182695	2.7864	68.5448	106.827	54.37	246.306	246.126	3	1	4	1	2	0	3	18	36	2	2	2	1	1	1	0	0	0	1	1	1	0.466667	10.5562	6.4202	5.0611	3.76335	2.47319	6.4202	5.0611	3.76335	2.47319	-1.64	12.8076	5.33759	2.78076	0	16.8591
84	CC(N1C(C2=CC=C(Cl)C=C2)=O)=C(CC(O)=O)C3=C1C=CC(OC)=C3	CC[Se][Se]CC	NC(C1=CN(CC2=CC=C(C(F)(F)F)C=C2)C=CC1)=O	[H]C(N(C)C)=O	CC(N1C(C2=CC=C(Cl)C=C2)=O)=C(C[Se]CC)C3=C1C=CC(OC)=C3	0	3.92732	95.7473	148.948	68.53	357.793	357.077	5	1	4	1	4	0	6	25	41	0	0	3	3	0	0	1	0	0	2	0	0	0.157895	14.5016	7.9985	6.10145	4.41613	3.07299	7.62054	5.66501	4.16415	2.947	-2.79	17.0467	6.60718	3.10467	4.73686	28.6599
96	BrC1=CC=C(CC(O)=O)C=C1	CC[Se][Se]CC	NC(C1=CN(CC2=CC=C(OC)C=C2)C=CC1)=O	CS(C)=O	BrC1=CC=C(C[Se]CC)C=C1	0.018456	2.0762	45.4818	72.9846	37.3	215.046	213.963	2	1	2	1	1	0	3	11	18	0	0	1	1	0	0	0	0	0	1	0	0	0.125	7.33593	3.93819	3.11266	1.79727	1.04121	3.14519	2.19698	1.26861	0.776878	-0.83	8.26833	3.52892	2.71792	0	11.0758
101	COC1=CC=C(CC(O)=O)C=C1	CC[Se][Se]CC	NC(C1=CN(CC2=CC=CC=C2)C=CC1)=O	[H]C(N(C)C)=O	COC1=CC=C(C[Se]CC)C=C1	0.0905168	1.3223	44.3338	70.5955	46.53	166.176	166.063	3	1	3	1	2	0	3	12	22	0	0	1	1	0	0	0	0	0	1	0	0	0.222222	6.78022	3.56858	2.41859	1.5144	0.918008	3.56858	2.41859	1.5144	0.918008	-1.51	8.58533	3.75887	2.26848	4.73686	18.1856
108	CC1=C(CC(O)=O)C=CC=C1	CC[Se][Se]CC	NC(C1=CN(CC2=CC=CC=C2)C=C(C(N)=O)C1)=O	CC#N	CC1=C(C[Se]CC)C=CC=C1	0.0075	1.62212	42.5188	65.482	37.3	150.177	150.068	2	1	2	1	1	0	2	11	21	0	0	1	1	0	0	0	0	0	1	0	0	0.222222	6.37197	3.46219	2.497	1.60293	0.971355	3.46219	2.497	1.60293	0.971355	-1.31	7.7932	3.19116	2.07522	0	11.0758
112	BrC1=CC=C(CC(O)=O)C=C1	C1([Se][Se]C2=CC=CC=C2)=CC=CC=C1	NC(C1=CN(CC2=CC=C(C(F)(F)F)C=C2)C=CC1)=O	CS(C)=O	BrC1=CC=C(C[Se]C2=CC=CC=C2)C=C1	0.266711	2.0762	45.4818	72.9846	37.3	215.046	213.963	2	1	2	1	1	0	3	11	18	0	0	1	1	0	0	0	0	0	1	0	0	0.125	7.33593	3.93819	3.11266	1.79727	1.04121	3.14519	2.19698	1.26861	0.776878	-0.83	8.26833	3.52892	2.71792	0	11.0758
114	COC1=CC=C(CC(O)=O)C=C1	C1([Se][Se]C2=CC=CC=C2)=CC=CC=C1	NC(C1=CN(CC2=CC=CC=C2)C=C(C(N)=O)C1C3=CC=CC=C3)=O	CS(C)=O	COC1=CC=C(C[Se]C2=CC=CC=C2)C=C1	0	1.3223	44.3338	70.5955	46.53	166.176	166.063	3	1	3	1	2	0	3	12	22	0	0	1	1	0	0	0	0	0	1	0	0	0.222222	6.78022	3.56858	2.41859	1.5144	0.918008	3.56858	2.41859	1.5144	0.918008	-1.51	8.58533	3.75887	2.26848	4.73686	18.1856
122	O=C(N1CCC(C(O)=O)CC1)OCC2=CC=CC=C2	C1([Se][Se]C2=CC=CC=C2)=CC=CC=C1	NC(C1=CN(CC2=CC=CC=C2)C=C(C(N)=O)C1C3=CC=CC=C3)=O	CS(C)=O	O=C(N1CCC([Se]C2=CC=CC=C2)CC1)OCC3=CC=CC=C3	0.650005	2.1198	68.5598	111.336	66.84	263.293	263.116	5	1	3	1	3	1	5	19	36	0	0	2	1	1	1	0	1	1	1	0	0	0.428571	10.6188	6.35013	4.63974	3.30753	2.11961	6.35013	4.63974	3.30753	2.11961	-2.04	13.393	6.22189	3.70857	0	35.1585
123	O=C(OCC1=CC=CC=C1)[C@H](NC(OC(C)(C)C)=O)CC(O)=O	C1([Se][Se]C2=CC=CC=C2)=CC=CC=C1	NC(C1=CN(CC2=CC=CC=C2)C=CC1)=O	CS(C)=O	O=C(OCC1=CC=CC=C1)[C@H](NC(OC(C)(C)C)=O)C[Se]C2=CC=CC=C2	0.871815	2.0978	81.6485	134.137	101.93	323.345	323.137	7	2	6	2	5	1	7	23	44	1	0	1	1	0	0	0	0	0	1	0	0	0.4375	13.3668	7.09042	5.88999	2.57815	1.64702	7.09042	5.88999	2.57815	1.64702	-2.57	18.4789	8.16525	7.84542	5.31679	34.7813
128	CC1=CC=C(S(N2CCC(C(O)=O)CC2)(=O)=O)C=C1	C1([Se][Se]C2=CC=CC=C2)=CC=CC=C1	NC(C1=CN(CC2=CC=CC=C2)C=CC1)=O	[H]C(N(C)C)=O	CC1=CC=C(S(N2CCC([Se]C3=CC=CC=C3)CC2)(=O)=O)C=C1	0.532919	1.48032	70.2976	112.457	74.68	283.349	283.088	5	1	3	1	3	0	6	19	36	0	0	2	1	1	1	0	1	1	1	0	0	0.461538	11.5591	7.64682	6.76758	5.37479	3.67212	6.20676	4.82965	3.46193	2.20242	-1.4	14.0185	5.30321	2.95571	0	36.8884
129	O=C(CCC1=CC=CC=C1)O	C1([Se][Se]C2=CC=CC=C2)=CC=CC=C1	NC(C1=CN(CC2=CC=CC=C2)C=C(C(N)=O)C1C3=CC=CC=C3)=O	[H]C(N(C)C)=O	C1(CC[Se]C2=CC=CC=C2)=CC=CC=C1	0	1.7038	42.3988	65.482	37.3	150.177	150.068	2	1	3	1	1	0	2	11	21	0	0	1	1	0	0	0	0	0	1	0	0	0.222222	6.15643	3.54552	2.37934	1.47037	0.895948	3.54552	2.37934	1.47037	0.895948	-1.31	7.7932	3.76048	2.84605	0	11.0758
134	BrC1=CC=C(CC(O)=O)C=C1	C1([Se][Se]C2=CC=CC=C2)=CC=CC=C1	NC(C1=CN(CC2=CC=CC=C2)C=C(C(N)=O)C1C3=CC=CC=C3)=O	[H]C(N(C)C)=O	BrC1=CC=C(C[Se]C2=CC=CC=C2)C=C1	0.227438	2.0762	45.4818	72.9846	37.3	215.046	213.963	2	1	2	1	1	0	3	11	18	0	0	1	1	0	0	0	0	0	1	0	0	0.125	7.33593	3.93819	3.11266	1.79727	1.04121	3.14519	2.19698	1.26861	0.776878	-0.83	8.26833	3.52892	2.71792	0	11.0758
137	O=C(N1CCC(C(O)=O)CC1)OCC2=CC=CC=C2	C1([Se][Se]C2=CC=CC=C2)=CC=CC=C1	NC(C1=CN(CC2=CC=C(C(F)(F)F)C=C2)C=CC1)=O	[H]C(N(C)C)=O	O=C(N1CCC([Se]C2=CC=CC=C2)CC1)OCC3=CC=CC=C3	0.862144	2.1198	68.5598	111.336	66.84	263.293	263.116	5	1	3	1	3	1	5	19	36	0	0	2	1	1	1	0	1	1	1	0	0	0.428571	10.6188	6.35013	4.63974	3.30753	2.11961	6.35013	4.63974	3.30753	2.11961	-2.04	13.393	6.22189	3.70857	0	35.1585
140	O=C(C1(C2=CC=CC=C2)CC1)O	C1([Se][Se]C2=CC=CC=C2)=CC=CC=C1	NC(C1=CN(CC2=CC=CC=C2)C=C(C(N)=O)C1)=O	[H]C(N(C)C)=O	C1(C2([Se]C3=CC=CC=C3)CC2)=CC=CC=C1	0	1.8028	44.9898	70.8411	37.3	162.188	162.068	2	1	2	1	1	0	2	12	22	0	0	2	1	1	1	0	0	0	1	1	1	0.3	6.65643	4.04552	3.25328	2.48576	1.5082	4.04552	3.25328	2.48576	1.5082	-1.31	7.34508	2.33834	0.915677	0	11.0758
142	O=C1C2=CC(CC(O)=O)=CC=C2OCC3=CC=CC=C13	C1([Se][Se]C2=CC=CC=C2)=CC=CC=C1	NC(C1=CN(CC2=CC=CC=C2)C=CC1)=O	CC#N	O=C1C2=CC(C[Se]C3=CC=CC=C3)=CC=C2OCC4=CC=CC=C14	0.578226	2.4371	71.9883	115.173	63.6	268.268	268.074	4	1	2	1	3	0	4	20	32	0	0	3	2	0	1	0	0	1	2	0	0	0.125	10.6276	6.2507	4.67597	3.28911	2.3333	6.2507	4.67597	3.28911	2.3333	-2.62	12.4157	4.81063	2.15906	4.73686	16.8591
144	CC1=CC=C(CC(O)=O)C=C1	C1([Se][Se]C2=CC=CC=C2)=CC=CC=C1	NC(C1=CN(CC2=CC=CC=C2)C=CC1)=O	CC#N	CC1=CC=C(C[Se]C2=CC=CC=C2)C=C1	0.142455	1.62212	42.5188	65.482	37.3	150.177	150.068	2	1	2	1	1	0	2	11	21	0	0	1	1	0	0	0	0	0	1	0	0	0.222222	6.37197	3.4562	2.55611	1.47595	0.880551	3.4562	2.55611	1.47595	0.880551	-1.31	7.7932	3.19116	2.41518	0	11.0758
148	O=C(C1CCOCC1)O	C1([Se][Se]C2=CC=CC=C2)=CC=CC=C1	NC(C1=CN(CC2=CC=C(C(F)(F)F)C=C2)C=CC1)=O	CC#N	C1([Se]C2=CC=CC=C2)CCOCC1	0.03	0.4976	31.1788	53.6274	46.53	130.143	130.063	3	1	1	1	2	0	3	9	19	0	0	1	0	1	1	0	1	1	0	0	0	0.833333	5.16949	3.11025	2.22488	1.57054	0.944535	3.11025	2.22488	1.57054	0.944535	-0.57	6.54862	2.82385	1.67686	0	24.2896
149	O=C(N1CCC(C(O)=O)CC1)OCC2=CC=CC=C2	C1([Se][Se]C2=CC=CC=C2)=CC=CC=C1	NC(C1=CN(CC2=CC=C(OC)C=C2)C=CC1)=O	CC#N	O=C(N1CCC([Se]C2=CC=CC=C2)CC1)OCC3=CC=CC=C3	0.680556	2.1198	68.5598	111.336	66.84	263.293	263.116	5	1	3	1	3	1	5	19	36	0	0	2	1	1	1	0	1	1	1	0	0	0.428571	10.6188	6.35013	4.63974	3.30753	2.11961	6.35013	4.63974	3.30753	2.11961	-2.04	13.393	6.22189	3.70857	0	35.1585
151	O=C(C1CCC1)O	C1([Se][Se]C2=CC=CC=C2)=CC=CC=C1	NC(C1=CN(CC2=CC=CC=C2)C=C(C(N)=O)C1C3=CC=CC=C3)=O	CC#N	C1([Se]C2=CC=CC=C2)CCC1	0.0076212	0.8711	24.9768	42.1489	37.3	100.117	100.052	2	1	1	1	1	0	2	7	15	0	0	1	0	1	1	0	0	0	0	1	1	0.8	4.05413	2.5329	1.96606	1.45441	0.655199	2.5329	1.96606	1.45441	0.655199	-0.53	4.62456	1.52348	0.734423	0	11.0758
159	CC(C1=CC=C(CC2C(CCC2)=O)C=C1)C(O)=O	C1(C[Se][Se]CC2=CC=CC=C2)=CC=CC=C1	NC(C1=CN(CC2=CC=CC=C2)C=C(C(N)=O)C1)=O	CS(C)=O	CC(C1=CC=C(CC2C(CCC2)=O)C=C1)[Se]CC3=CC=CC=C3	0.0083612	2.7864	68.5448	106.827	54.37	246.306	246.126	3	1	4	1	2	0	3	18	36	2	2	2	1	1	1	0	0	0	1	1	1	0.466667	10.5562	6.4202	5.0611	3.76335	2.47319	6.4202	5.0611	3.76335	2.47319	-1.64	12.8076	5.33759	2.78076	0	16.8591
161	CC(N(C(C1=C2C=CC=C1)=O)C2=O)C(O)=O	C1(C[Se][Se]CC2=CC=CC=C2)=CC=CC=C1	NC(C1=CN(CC2=CC=C(OC)C=C2)C=CC1)=O	[H]C(N(C)C)=O	CC(N(C(C1=C2C=CC=C1)=O)C2=O)[Se]CC3=CC=CC=C3	0.236296	0.7557	54.0398	91.2889	74.68	219.196	219.053	5	1	2	1	3	2	5	16	25	1	1	2	1	0	1	0	0	1	1	0	0	0.181818	8.50592	4.73477	3.5401	2.57017	1.67007	4.73477	3.5401	2.57017	1.67007	-2.17	10.3513	3.44496	1.28736	0	33.8319
168	CC1=CC=C(S(N2CCC(C(O)=O)CC2)(=O)=O)C=C1	C1(C[Se][Se]CC2=CC=CC=C2)=CC=CC=C1	NC(C1=CN(CC2=CC=CC=C2)C=C(C(N)=O)C1C3=CC=CC=C3)=O	CC#N	CC1=CC=C(S(N2CCC([Se]CC3=CC=CC=C3)CC2)(=O)=O)C=C1	0	1.48032	70.2976	112.457	74.68	283.349	283.088	5	1	3	1	3	0	6	19	36	0	0	2	1	1	1	0	1	1	1	0	0	0.461538	11.5591	7.64682	6.76758	5.37479	3.67212	6.20676	4.82965	3.46193	2.20242	-1.4	14.0185	5.30321	2.95571	0	36.8884
178	CC(C1=CC=C2C=C(OC)C=CC2=C1)C(O)=O	C1(C[Se][Se]CC2=CC=CC=C2)=CC=CC=C1	NC(C1=CN(CC2=CC=CC=C2)C=CC1)=O	CS(C)=O	CC(C1=CC=C2C=C(OC)C=CC2=C1)[Se]CC3=CC=CC=C3	0.0466375	3.0365	66.5508	99.6421	46.53	230.263	230.094	3	1	3	1	2	0	3	17	31	1	1	2	2	0	0	0	0	0	2	0	0	0.214286	9.80516	5.42087	4.03244	2.94189	1.78119	5.42087	4.03244	2.94189	1.78119	-2.03	11.4553	4.45404	2.22849	4.73686	18.1856
180	O=C(N1CCC(C(O)=O)CC1)OCC2=CC=CC=C2	C1(C[Se][Se]CC2=CC=CC=C2)=CC=CC=C1	NC(C1=CN(CC2=CC=C(OC)C=C2)C=CC1)=O	[H]C(N(C)C)=O	O=C(N1CCC([Se]CC2=CC=CC=C2)CC1)OCC3=CC=CC=C3	0.0654312	2.1198	68.5598	111.336	66.84	263.293	263.116	5	1	3	1	3	1	5	19	36	0	0	2	1	1	1	0	1	1	1	0	0	0.428571	10.6188	6.35013	4.63974	3.30753	2.11961	6.35013	4.63974	3.30753	2.11961	-2.04	13.393	6.22189	3.70857	0	35.1585
184	O=C(C1CCC1)O	C1(C[Se][Se]CC2=CC=CC=C2)=CC=CC=C1	NC(C1=CN(CC2=CC=CC=C2)C=C(C(N)=O)C1C3=CC=CC=C3)=O	[H]C(N(C)C)=O	C1([Se]CC2=CC=CC=C2)CCC1	0	0.8711	24.9768	42.1489	37.3	100.117	100.052	2	1	1	1	1	0	2	7	15	0	0	1	0	1	1	0	0	0	0	1	1	0.8	4.05413	2.5329	1.96606	1.45441	0.655199	2.5329	1.96606	1.45441	0.655199	-0.53	4.62456	1.52348	0.734423	0	11.0758
197	CC(C1=CC=C(CC2C(CCC2)=O)C=C1)C(O)=O	CC[Se][Se]CC	NC(C1=CN(CC2=CC=CC=C2)C=C(C(N)=O)C1)=O	[H]C(N(C)C)=O	CC(C1=CC=C(CC2C(CCC2)=O)C=C1)[Se]CC	0.133654	2.7864	68.5448	106.827	54.37	246.306	246.126	3	1	4	1	2	0	3	18	36	2	2	2	1	1	1	0	0	0	1	1	1	0.466667	10.5562	6.4202	5.0611	3.76335	2.47319	6.4202	5.0611	3.76335	2.47319	-1.64	12.8076	5.33759	2.78076	0	16.8591
198	CC(N(C(C1=C2C=CC=C1)=O)C2=O)C(O)=O	CC[Se][Se]CC	NC(C1=CN(CC2=CC=C(OC)C=C2)C=CC1)=O	CC#N	CC(N(C(C1=C2C=CC=C1)=O)C2=O)[Se]CC	0	0.7557	54.0398	91.2889	74.68	219.196	219.053	5	1	2	1	3	2	5	16	25	1	1	2	1	0	1	0	0	1	1	0	0	0.181818	8.50592	4.73477	3.5401	2.57017	1.67007	4.73477	3.5401	2.57017	1.67007	-2.17	10.3513	3.44496	1.28736	0	33.8319
202	CC1=CC=C(CC(O)=O)C=C1	CC[Se][Se]CC	NC(C1=CN(CC2=CC=CC=C2)C=C(C(N)=O)C1C3=CC=CC=C3)=O	CS(C)=O	CC1=CC=C(C[Se]CC)C=C1	0.0170032	1.62212	42.5188	65.482	37.3	150.177	150.068	2	1	2	1	1	0	2	11	21	0	0	1	1	0	0	0	0	0	1	0	0	0.222222	6.37197	3.4562	2.55611	1.47595	0.880551	3.4562	2.55611	1.47595	0.880551	-1.31	7.7932	3.19116	2.41518	0	11.0758
209	O=C(CC1=CNC2=C1C=CC=C2)O	CC[Se][Se]CC	NC(C1=CN(CC2=CC=CC=C2)C=CC1)=O	[H]C(N(C)C)=O	CC[Se]CC1=CNC2=C1C=CC=C2	0.014725	1.795	49.6385	75.0079	53.09	175.187	175.063	3	2	2	2	1	0	3	13	22	0	0	2	2	0	0	1	0	0	1	0	0	0.1	6.94932	4.03954	2.93001	2.0166	1.44079	4.03954	2.93001	2.0166	1.44079	-1.77	7.85739	2.93568	1.40216	0	16.0598
225	CC(C1=CC=C2C=C(OC)C=CC2=C1)C(O)=O	C1([Se][Se]C2=CC=CC=C2)=CC=CC=C1	NC(C1=CN(CC2=CC=CC=C2)C=CC1)=O	CS(C)=O	CC(C1=CC=C2C=C(OC)C=CC2=C1)[Se]C3=CC=CC=C3	0.642473	3.0365	66.5508	99.6421	46.53	230.263	230.094	3	1	3	1	2	0	3	17	31	1	1	2	2	0	0	0	0	0	2	0	0	0.214286	9.80516	5.42087	4.03244	2.94189	1.78119	5.42087	4.03244	2.94189	1.78119	-2.03	11.4553	4.45404	2.22849	4.73686	18.1856
228	CC(N1C(C2=CC=C(Cl)C=C2)=O)=C(CC(O)=O)C3=C1C=CC(OC)=C3	C1([Se][Se]C2=CC=CC=C2)=CC=CC=C1	NC(C1=CN(CC2=CC=C(OC)C=C2)C=CC1)=O	[H]C(N(C)C)=O	CC(N1C(C2=CC=C(Cl)C=C2)=O)=C(C[Se]C3=CC=CC=C3)C4=C1C=CC(OC)=C4	0.659568	3.92732	95.7473	148.948	68.53	357.793	357.077	5	1	4	1	4	0	6	25	41	0	0	3	3	0	0	1	0	0	2	0	0	0.157895	14.5016	7.9985	6.10145	4.41613	3.07299	7.62054	5.66501	4.16415	2.947	-2.79	17.0467	6.60718	3.10467	4.73686	28.6599
230	BrC1=CC=C(CC(O)=O)C=C1	C1([Se][Se]C2=CC=CC=C2)=CC=CC=C1	NC(C1=CN(CC2=CC=C(C(F)(F)F)C=C2)C=CC1)=O	[H]C(N(C)C)=O	BrC1=CC=C(C[Se]C2=CC=CC=C2)C=C1	0.418264	2.0762	45.4818	72.9846	37.3	215.046	213.963	2	1	2	1	1	0	3	11	18	0	0	1	1	0	0	0	0	0	1	0	0	0.125	7.33593	3.93819	3.11266	1.79727	1.04121	3.14519	2.19698	1.26861	0.776878	-0.83	8.26833	3.52892	2.71792	0	11.0758
231	COC1=CC=C(CC(O)=O)C=C1	C1([Se][Se]C2=CC=CC=C2)=CC=CC=C1	NC(C1=CN(CC2=CC=CC=C2)C=CC1)=O	[H]C(N(C)C)=O	COC1=CC=C(C[Se]C2=CC=CC=C2)C=C1	0.69915	1.3223	44.3338	70.5955	46.53	166.176	166.063	3	1	3	1	2	0	3	12	22	0	0	1	1	0	0	0	0	0	1	0	0	0.222222	6.78022	3.56858	2.41859	1.5144	0.918008	3.56858	2.41859	1.5144	0.918008	-1.51	8.58533	3.75887	2.26848	4.73686	18.1856
232	O=C(N1CCC(C(O)=O)CC1)OCC2=CC=CC=C2	C1([Se][Se]C2=CC=CC=C2)=CC=CC=C1	NC(C1=CN(CC2=CC=CC=C2)C=C(C(N)=O)C1)=O	[H]C(N(C)C)=O	O=C(N1CCC([Se]C2=CC=CC=C2)CC1)OCC3=CC=CC=C3	0.795325	2.1198	68.5598	111.336	66.84	263.293	263.116	5	1	3	1	3	1	5	19	36	0	0	2	1	1	1	0	1	1	1	0	0	0.428571	10.6188	6.35013	4.63974	3.30753	2.11961	6.35013	4.63974	3.30753	2.11961	-2.04	13.393	6.22189	3.70857	0	35.1585
236	O=C(CCC1=CC=CC=C1)O	C1([Se][Se]C2=CC=CC=C2)=CC=CC=C1	NC(C1=CN(CC2=CC=C(C(F)(F)F)C=C2)C=CC1)=O	CC#N	C1(CC[Se]C2=CC=CC=C2)=CC=CC=C1	0.1929	1.7038	42.3988	65.482	37.3	150.177	150.068	2	1	3	1	1	0	2	11	21	0	0	1	1	0	0	0	0	0	1	0	0	0.222222	6.15643	3.54552	2.37934	1.47037	0.895948	3.54552	2.37934	1.47037	0.895948	-1.31	7.7932	3.76048	2.84605	0	11.0758
238	BrC1=CC=C(CC(O)=O)C=C1	C1([Se][Se]C2=CC=CC=C2)=CC=CC=C1	NC(C1=CN(CC2=CC=CC=C2)C=CC1)=O	CC#N	BrC1=CC=C(C[Se]C2=CC=CC=C2)C=C1	0.290879	2.0762	45.4818	72.9846	37.3	215.046	213.963	2	1	2	1	1	0	3	11	18	0	0	1	1	0	0	0	0	0	1	0	0	0.125	7.33593	3.93819	3.11266	1.79727	1.04121	3.14519	2.19698	1.26861	0.776878	-0.83	8.26833	3.52892	2.71792	0	11.0758
246	CC(C1=CC=C2C=C(OC)C=CC2=C1)C(O)=O	C1([Se][Se]C2=CC=CC=C2)=CC=CC=C1	NC(C1=CN(CC2=CC=C(OC)C=C2)C=CC1)=O	CC#N	CC(C1=CC=C2C=C(OC)C=CC2=C1)[Se]C3=CC=CC=C3	0.29431	3.0365	66.5508	99.6421	46.53	230.263	230.094	3	1	3	1	2	0	3	17	31	1	1	2	2	0	0	0	0	0	2	0	0	0.214286	9.80516	5.42087	4.03244	2.94189	1.78119	5.42087	4.03244	2.94189	1.78119	-2.03	11.4553	4.45404	2.22849	4.73686	18.1856
248	O=C(CCCC1=CNC2=C1C=CC=C2)O	C1(C[Se][Se]CC2=CC=CC=C2)=CC=CC=C1	NC(C1=CN(CC2=CC=CC=C2)C=C(C(N)=O)C1)=O	CS(C)=O	C1(CCC[Se]CC2=CC=CC=C2)=CNC3=C1C=CC=C3	0.0271484	2.5752	58.8725	87.7378	53.09	203.241	203.095	3	2	4	2	1	0	3	15	28	0	0	2	2	0	0	1	0	0	1	0	0	0.25	8.36353	5.03954	3.60679	2.51168	1.76852	5.03954	3.60679	2.51168	1.76852	-1.77	9.77244	4.17088	2.18007	0	16.0598
249	CC1=CC=C(S(N2CCC(C(O)=O)CC2)(=O)=O)C=C1	C1(C[Se][Se]CC2=CC=CC=C2)=CC=CC=C1	NC(C1=CN(CC2=CC=CC=C2)C=C(C(N)=O)C1C3=CC=CC=C3)=O	CS(C)=O	CC1=CC=C(S(N2CCC([Se]CC3=CC=CC=C3)CC2)(=O)=O)C=C1	0.0358984	1.48032	70.2976	112.457	74.68	283.349	283.088	5	1	3	1	3	0	6	19	36	0	0	2	1	1	1	0	1	1	1	0	0	0.461538	11.5591	7.64682	6.76758	5.37479	3.67212	6.20676	4.82965	3.46193	2.20242	-1.4	14.0185	5.30321	2.95571	0	36.8884
256	CC1=CC=C(S(N2CCC(C(O)=O)CC2)(=O)=O)C=C1	C1(C[Se][Se]CC2=CC=CC=C2)=CC=CC=C1	NC(C1=CN(CC2=CC=CC=C2)C=C(C(N)=O)C1C3=CC=CC=C3)=O	[H]C(N(C)C)=O	CC1=CC=C(S(N2CCC([Se]CC3=CC=CC=C3)CC2)(=O)=O)C=C1	0.0364648	1.48032	70.2976	112.457	74.68	283.349	283.088	5	1	3	1	3	0	6	19	36	0	0	2	1	1	1	0	1	1	1	0	0	0.461538	11.5591	7.64682	6.76758	5.37479	3.67212	6.20676	4.82965	3.46193	2.20242	-1.4	14.0185	5.30321	2.95571	0	36.8884
258	CC(N(C(C1=C2C=CC=C1)=O)C2=O)C(O)=O	C1(C[Se][Se]CC2=CC=CC=C2)=CC=CC=C1	NC(C1=CN(CC2=CC=CC=C2)C=C(C(N)=O)C1)=O	CC#N	CC(N(C(C1=C2C=CC=C1)=O)C2=O)[Se]CC3=CC=CC=C3	0.18986	0.7557	54.0398	91.2889	74.68	219.196	219.053	5	1	2	1	3	2	5	16	25	1	1	2	1	0	1	0	0	1	1	0	0	0.181818	8.50592	4.73477	3.5401	2.57017	1.67007	4.73477	3.5401	2.57017	1.67007	-2.17	10.3513	3.44496	1.28736	0	33.8319
274	O=C(OCC1=CC=CC=C1)[C@H](NC(OC(C)(C)C)=O)CC(O)=O	C1(C[Se][Se]CC2=CC=CC=C2)=CC=CC=C1	NC(C1=CN(CC2=CC=C(C(F)(F)F)C=C2)C=CC1)=O	[H]C(N(C)C)=O	O=C(OCC1=CC=CC=C1)[C@H](NC(OC(C)(C)C)=O)C[Se]CC2=CC=CC=C2	0.0274862	2.0978	81.6485	134.137	101.93	323.345	323.137	7	2	6	2	5	1	7	23	44	1	0	1	1	0	0	0	0	0	1	0	0	0.4375	13.3668	7.09042	5.88999	2.57815	1.64702	7.09042	5.88999	2.57815	1.64702	-2.57	18.4789	8.16525	7.84542	5.31679	34.7813
279	CC(C1=CC=C2C=C(OC)C=CC2=C1)C(O)=O	C1(C[Se][Se]CC2=CC=CC=C2)=CC=CC=C1	NC(C1=CN(CC2=CC=C(OC)C=C2)C=CC1)=O	[H]C(N(C)C)=O	CC(C1=CC=C2C=C(OC)C=CC2=C1)[Se]CC3=CC=CC=C3	0.0800975	3.0365	66.5508	99.6421	46.53	230.263	230.094	3	1	3	1	2	0	3	17	31	1	1	2	2	0	0	0	0	0	2	0	0	0.214286	9.80516	5.42087	4.03244	2.94189	1.78119	5.42087	4.03244	2.94189	1.78119	-2.03	11.4553	4.45404	2.22849	4.73686	18.1856
284	O=C(C1CCC1)O	C1(C[Se][Se]CC2=CC=CC=C2)=CC=CC=C1	NC(C1=CN(CC2=CC=CC=C2)C=C(C(N)=O)C1C3=CC=CC=C3)=O	CC#N	C1([Se]CC2=CC=CC=C2)CCC1	0.0124185	0.8711	24.9768	42.1489	37.3	100.117	100.052	2	1	1	1	1	0	2	7	15	0	0	1	0	1	1	0	0	0	0	1	1	0.8	4.05413	2.5329	1.96606	1.45441	0.655199	2.5329	1.96606	1.45441	0.655199	-0.53	4.62456	1.52348	0.734423	0	11.0758
296	O=C1C2=CC(CC(O)=O)=CC=C2OCC3=CC=CC=C13	CC[Se][Se]CC	NC(C1=CN(CC2=CC=CC=C2)C=C(C(N)=O)C1C3=CC=CC=C3)=O	[H]C(N(C)C)=O	O=C1C2=CC(C[Se]CC)=CC=C2OCC3=CC=CC=C13	0	2.4371	71.9883	115.173	63.6	268.268	268.074	4	1	2	1	3	0	4	20	32	0	0	3	2	0	1	0	0	1	2	0	0	0.125	10.6276	6.2507	4.67597	3.28911	2.3333	6.2507	4.67597	3.28911	2.3333	-2.62	12.4157	4.81063	2.15906	4.73686	16.8591
301	CC1=CC=C(S(N2CCC(C(O)=O)CC2)(=O)=O)C=C1	CC[Se][Se]CC	NC(C1=CN(CC2=CC=CC=C2)C=CC1)=O	CC#N	CC1=CC=C(S(N2CCC([Se]CC)CC2)(=O)=O)C=C1	0.0005128	1.48032	70.2976	112.457	74.68	283.349	283.088	5	1	3	1	3	0	6	19	36	0	0	2	1	1	1	0	1	1	1	0	0	0.461538	11.5591	7.64682	6.76758	5.37479	3.67212	6.20676	4.82965	3.46193	2.20242	-1.4	14.0185	5.30321	2.95571	0	36.8884
302	CC1=CC=C(S(N2CCC(C(O)=O)CC2)(=O)=O)C=C1	CC[Se][Se]CC	NC(C1=CN(CC2=CC=C(C(F)(F)F)C=C2)C=CC1)=O	CC#N	CC1=CC=C(S(N2CCC([Se]CC)CC2)(=O)=O)C=C1	0.0005128	1.48032	70.2976	112.457	74.68	283.349	283.088	5	1	3	1	3	0	6	19	36	0	0	2	1	1	1	0	1	1	1	0	0	0.461538	11.5591	7.64682	6.76758	5.37479	3.67212	6.20676	4.82965	3.46193	2.20242	-1.4	14.0185	5.30321	2.95571	0	36.8884
307	CC1=C(CC(O)=O)C=CC=C1	CC[Se][Se]CC	NC(C1=CN(CC2=CC=CC=C2)C=CC1)=O	CS(C)=O	CC1=C(C[Se]CC)C=CC=C1	0.492272	1.62212	42.5188	65.482	37.3	150.177	150.068	2	1	2	1	1	0	2	11	21	0	0	1	1	0	0	0	0	0	1	0	0	0.222222	6.37197	3.46219	2.497	1.60293	0.971355	3.46219	2.497	1.60293	0.971355	-1.31	7.7932	3.19116	2.07522	0	11.0758
308	CC1=C(CC(O)=O)C=CC=C1	CC[Se][Se]CC	NC(C1=CN(CC2=CC=CC=C2)C=C(C(N)=O)C1C3=CC=CC=C3)=O	CS(C)=O	CC1=C(C[Se]CC)C=CC=C1	0	1.62212	42.5188	65.482	37.3	150.177	150.068	2	1	2	1	1	0	2	11	21	0	0	1	1	0	0	0	0	0	1	0	0	0.222222	6.37197	3.46219	2.497	1.60293	0.971355	3.46219	2.497	1.60293	0.971355	-1.31	7.7932	3.19116	2.07522	0	11.0758
315	BrC1=CC=C(CC(O)=O)C=C1	CC[Se][Se]CC	NC(C1=CN(CC2=CC=CC=C2)C=C(C(N)=O)C1C3=CC=CC=C3)=O	CC#N	BrC1=CC=C(C[Se]CC)C=C1	0	2.0762	45.4818	72.9846	37.3	215.046	213.963	2	1	2	1	1	0	3	11	18	0	0	1	1	0	0	0	0	0	1	0	0	0.125	7.33593	3.93819	3.11266	1.79727	1.04121	3.14519	2.19698	1.26861	0.776878	-0.83	8.26833	3.52892	2.71792	0	11.0758
316	COC1=CC=C(CC(O)=O)C=C1	CC[Se][Se]CC	NC(C1=CN(CC2=CC=CC=C2)C=CC1)=O	CC#N	COC1=CC=C(C[Se]CC)C=C1	0.0987224	1.3223	44.3338	70.5955	46.53	166.176	166.063	3	1	3	1	2	0	3	12	22	0	0	1	1	0	0	0	0	0	1	0	0	0.222222	6.78022	3.56858	2.41859	1.5144	0.918008	3.56858	2.41859	1.5144	0.918008	-1.51	8.58533	3.75887	2.26848	4.73686	18.1856
321	BrC1=CC=C(CC(O)=O)C=C1	C1([Se][Se]C2=CC=CC=C2)=CC=CC=C1	NC(C1=CN(CC2=CC=CC=C2)C=CC1)=O	CS(C)=O	BrC1=CC=C(C[Se]C2=CC=CC=C2)C=C1	0.269228	2.0762	45.4818	72.9846	37.3	215.046	213.963	2	1	2	1	1	0	3	11	18	0	0	1	1	0	0	0	0	0	1	0	0	0.125	7.33593	3.93819	3.11266	1.79727	1.04121	3.14519	2.19698	1.26861	0.776878	-0.83	8.26833	3.52892	2.71792	0	11.0758
323	COC1=CC=C(CC(O)=O)C=C1	C1([Se][Se]C2=CC=CC=C2)=CC=CC=C1	NC(C1=CN(CC2=CC=CC=C2)C=C(C(N)=O)C1)=O	CS(C)=O	COC1=CC=C(C[Se]C2=CC=CC=C2)C=C1	0.160976	1.3223	44.3338	70.5955	46.53	166.176	166.063	3	1	3	1	2	0	3	12	22	0	0	1	1	0	0	0	0	0	1	0	0	0.222222	6.78022	3.56858	2.41859	1.5144	0.918008	3.56858	2.41859	1.5144	0.918008	-1.51	8.58533	3.75887	2.26848	4.73686	18.1856
330	CC1=CC=C(S(N2CCC(C(O)=O)CC2)(=O)=O)C=C1	C1([Se][Se]C2=CC=CC=C2)=CC=CC=C1	NC(C1=CN(CC2=CC=CC=C2)C=C(C(N)=O)C1)=O	[H]C(N(C)C)=O	CC1=CC=C(S(N2CCC([Se]C3=CC=CC=C3)CC2)(=O)=O)C=C1	0.378481	1.48032	70.2976	112.457	74.68	283.349	283.088	5	1	3	1	3	0	6	19	36	0	0	2	1	1	1	0	1	1	1	0	0	0.461538	11.5591	7.64682	6.76758	5.37479	3.67212	6.20676	4.82965	3.46193	2.20242	-1.4	14.0185	5.30321	2.95571	0	36.8884
333	FC1(F)CCC(C(O)=O)CC1	C1([Se][Se]C2=CC=CC=C2)=CC=CC=C1	NC(C1=CN(CC2=CC=CC=C2)C=C(C(N)=O)C1)=O	[H]C(N(C)C)=O	FC1(F)CCC([Se]C2=CC=CC=C2)CC1	0.245239	1.8965	34.5408	63.2099	37.3	164.151	164.065	2	1	1	1	1	0	4	11	21	0	0	1	0	1	1	0	0	0	0	1	1	0.857143	6.01717	3.61797	2.96846	2.06636	1.28709	3.61797	2.96846	2.06636	1.28709	-0.67	8.42681	2.75478	2.13307	0	16.9984
337	BrC1=CC=C(CC(O)=O)C=C1	C1([Se][Se]C2=CC=CC=C2)=CC=CC=C1	NC(C1=CN(CC2=CC=C(OC)C=C2)C=CC1)=O	[H]C(N(C)C)=O	BrC1=CC=C(C[Se]C2=CC=CC=C2)C=C1	0.389062	2.0762	45.4818	72.9846	37.3	215.046	213.963	2	1	2	1	1	0	3	11	18	0	0	1	1	0	0	0	0	0	1	0	0	0.125	7.33593	3.93819	3.11266	1.79727	1.04121	3.14519	2.19698	1.26861	0.776878	-0.83	8.26833	3.52892	2.71792	0	11.0758
343	CC(C1=CC=C2C=C(OC)C=CC2=C1)C(O)=O	C1([Se][Se]C2=CC=CC=C2)=CC=CC=C1	NC(C1=CN(CC2=CC=CC=C2)C=C(C(N)=O)C1)=O	[H]C(N(C)C)=O	CC(C1=CC=C2C=C(OC)C=CC2=C1)[Se]C3=CC=CC=C3	0.640687	3.0365	66.5508	99.6421	46.53	230.263	230.094	3	1	3	1	2	0	3	17	31	1	1	2	2	0	0	0	0	0	2	0	0	0.214286	9.80516	5.42087	4.03244	2.94189	1.78119	5.42087	4.03244	2.94189	1.78119	-2.03	11.4553	4.45404	2.22849	4.73686	18.1856
352	CC(N1C(C2=CC=C(Cl)C=C2)=O)=C(CC(O)=O)C3=C1C=CC(OC)=C3	C1([Se][Se]C2=CC=CC=C2)=CC=CC=C1	NC(C1=CN(CC2=CC=CC=C2)C=C(C(N)=O)C1C3=CC=CC=C3)=O	CC#N	CC(N1C(C2=CC=C(Cl)C=C2)=O)=C(C[Se]C3=CC=CC=C3)C4=C1C=CC(OC)=C4	0.210031	3.92732	95.7473	148.948	68.53	357.793	357.077	5	1	4	1	4	0	6	25	41	0	0	3	3	0	0	1	0	0	2	0	0	0.157895	14.5016	7.9985	6.10145	4.41613	3.07299	7.62054	5.66501	4.16415	2.947	-2.79	17.0467	6.60718	3.10467	4.73686	28.6599
356	CC(C1=CC=C2C=C(OC)C=CC2=C1)C(O)=O	C1([Se][Se]C2=CC=CC=C2)=CC=CC=C1	NC(C1=CN(CC2=CC=CC=C2)C=CC1)=O	CC#N	CC(C1=CC=C2C=C(OC)C=CC2=C1)[Se]C3=CC=CC=C3	0.27467	3.0365	66.5508	99.6421	46.53	230.263	230.094	3	1	3	1	2	0	3	17	31	1	1	2	2	0	0	0	0	0	2	0	0	0.214286	9.80516	5.42087	4.03244	2.94189	1.78119	5.42087	4.03244	2.94189	1.78119	-2.03	11.4553	4.45404	2.22849	4.73686	18.1856
358	CC(C1=CC=C2C=C(OC)C=CC2=C1)C(O)=O	C1([Se][Se]C2=CC=CC=C2)=CC=CC=C1	NC(C1=CN(CC2=CC=CC=C2)C=C(C(N)=O)C1)=O	CC#N	CC(C1=CC=C2C=C(OC)C=CC2=C1)[Se]C3=CC=CC=C3	0.0229217	3.0365	66.5508	99.6421	46.53	230.263	230.094	3	1	3	1	2	0	3	17	31	1	1	2	2	0	0	0	0	0	2	0	0	0.214286	9.80516	5.42087	4.03244	2.94189	1.78119	5.42087	4.03244	2.94189	1.78119	-2.03	11.4553	4.45404	2.22849	4.73686	18.1856
369	CC(N(C(C1=C2C=CC=C1)=O)C2=O)C(O)=O	C1(C[Se][Se]CC2=CC=CC=C2)=CC=CC=C1	NC(C1=CN(CC2=CC=C(OC)C=C2)C=CC1)=O	CC#N	CC(N(C(C1=C2C=CC=C1)=O)C2=O)[Se]CC3=CC=CC=C3	0.244122	0.7557	54.0398	91.2889	74.68	219.196	219.053	5	1	2	1	3	2	5	16	25	1	1	2	1	0	1	0	0	1	1	0	0	0.181818	8.50592	4.73477	3.5401	2.57017	1.67007	4.73477	3.5401	2.57017	1.67007	-2.17	10.3513	3.44496	1.28736	0	33.8319
376	O=C(C1CCC1)O	C1(C[Se][Se]CC2=CC=CC=C2)=CC=CC=C1	NC(C1=CN(CC2=CC=CC=C2)C=CC1)=O	CS(C)=O	C1([Se]CC2=CC=CC=C2)CCC1	0.067199	0.8711	24.9768	42.1489	37.3	100.117	100.052	2	1	1	1	1	0	2	7	15	0	0	1	0	1	1	0	0	0	0	1	1	0.8	4.05413	2.5329	1.96606	1.45441	0.655199	2.5329	1.96606	1.45441	0.655199	-0.53	4.62456	1.52348	0.734423	0	11.0758
384	O=C(OCC1=CC=CC=C1)[C@H](NC(OC(C)(C)C)=O)CC(O)=O	C1(C[Se][Se]CC2=CC=CC=C2)=CC=CC=C1	NC(C1=CN(CC2=CC=CC=C2)C=CC1)=O	CC#N	O=C(OCC1=CC=CC=C1)[C@H](NC(OC(C)(C)C)=O)C[Se]CC2=CC=CC=C2	0.0508345	2.0978	81.6485	134.137	101.93	323.345	323.137	7	2	6	2	5	1	7	23	44	1	0	1	1	0	0	0	0	0	1	0	0	0.4375	13.3668	7.09042	5.88999	2.57815	1.64702	7.09042	5.88999	2.57815	1.64702	-2.57	18.4789	8.16525	7.84542	5.31679	34.7813
397	CC(N1C(C2=CC=C(Cl)C=C2)=O)=C(CC(O)=O)C3=C1C=CC(OC)=C3	CC[Se][Se]CC	NC(C1=CN(CC2=CC=C(OC)C=C2)C=CC1)=O	[H]C(N(C)C)=O	CC(N1C(C2=CC=C(Cl)C=C2)=O)=C(C[Se]CC)C3=C1C=CC(OC)=C3	0.002	3.92732	95.7473	148.948	68.53	357.793	357.077	5	1	4	1	4	0	6	25	41	0	0	3	3	0	0	1	0	0	2	0	0	0.157895	14.5016	7.9985	6.10145	4.41613	3.07299	7.62054	5.66501	4.16415	2.947	-2.79	17.0467	6.60718	3.10467	4.73686	28.6599
400	O=C1C2=CC(CC(O)=O)=CC=C2OCC3=CC=CC=C13	CC[Se][Se]CC	NC(C1=CN(CC2=CC=C(OC)C=C2)C=CC1)=O	CC#N	O=C1C2=CC(C[Se]CC)=CC=C2OCC3=CC=CC=C13	0	2.4371	71.9883	115.173	63.6	268.268	268.074	4	1	2	1	3	0	4	20	32	0	0	3	2	0	1	0	0	1	2	0	0	0.125	10.6276	6.2507	4.67597	3.28911	2.3333	6.2507	4.67597	3.28911	2.3333	-2.62	12.4157	4.81063	2.15906	4.73686	16.8591
407	COC1=CC=C(CC(O)=O)C=C1	CC[Se][Se]CC	NC(C1=CN(CC2=CC=CC=C2)C=C(C(N)=O)C1C3=CC=CC=C3)=O	CS(C)=O	COC1=CC=C(C[Se]CC)C=C1	0.0673184	1.3223	44.3338	70.5955	46.53	166.176	166.063	3	1	3	1	2	0	3	12	22	0	0	1	1	0	0	0	0	0	1	0	0	0.222222	6.78022	3.56858	2.41859	1.5144	0.918008	3.56858	2.41859	1.5144	0.918008	-1.51	8.58533	3.75887	2.26848	4.73686	18.1856
412	CC1=C(CC(O)=O)C=CC=C1	CC[Se][Se]CC	NC(C1=CN(CC2=CC=C(OC)C=C2)C=CC1)=O	[H]C(N(C)C)=O	CC1=C(C[Se]CC)C=CC=C1	0.026829	1.62212	42.5188	65.482	37.3	150.177	150.068	2	1	2	1	1	0	2	11	21	0	0	1	1	0	0	0	0	0	1	0	0	0.222222	6.37197	3.46219	2.497	1.60293	0.971355	3.46219	2.497	1.60293	0.971355	-1.31	7.7932	3.19116	2.07522	0	11.0758
413	O=C(CC1=CNC2=C1C=CC=C2)O	CC[Se][Se]CC	NC(C1=CN(CC2=CC=C(C(F)(F)F)C=C2)C=CC1)=O	[H]C(N(C)C)=O	CC[Se]CC1=CNC2=C1C=CC=C2	0.018175	1.795	49.6385	75.0079	53.09	175.187	175.063	3	2	2	2	1	0	3	13	22	0	0	2	2	0	0	1	0	0	1	0	0	0.1	6.94932	4.03954	2.93001	2.0166	1.44079	4.03954	2.93001	2.0166	1.44079	-1.77	7.85739	2.93568	1.40216	0	16.0598
414	O=C(CC1=CNC2=C1C=CC=C2)O	CC[Se][Se]CC	NC(C1=CN(CC2=CC=CC=C2)C=C(C(N)=O)C1C3=CC=CC=C3)=O	[H]C(N(C)C)=O	CC[Se]CC1=CNC2=C1C=CC=C2	0.00155	1.795	49.6385	75.0079	53.09	175.187	175.063	3	2	2	2	1	0	3	13	22	0	0	2	2	0	0	1	0	0	1	0	0	0.1	6.94932	4.03954	2.93001	2.0166	1.44079	4.03954	2.93001	2.0166	1.44079	-1.77	7.85739	2.93568	1.40216	0	16.0598
415	BrC1=CC=C(CC(O)=O)C=C1	CC[Se][Se]CC	NC(C1=CN(CC2=CC=CC=C2)C=CC1)=O	CC#N	BrC1=CC=C(C[Se]CC)C=C1	0	2.0762	45.4818	72.9846	37.3	215.046	213.963	2	1	2	1	1	0	3	11	18	0	0	1	1	0	0	0	0	0	1	0	0	0.125	7.33593	3.93819	3.11266	1.79727	1.04121	3.14519	2.19698	1.26861	0.776878	-0.83	8.26833	3.52892	2.71792	0	11.0758
421	O=C(CC1=CNC2=C1C=CC=C2)O	CC[Se][Se]CC	NC(C1=CN(CC2=CC=C(C(F)(F)F)C=C2)C=CC1)=O	CC#N	CC[Se]CC1=CNC2=C1C=CC=C2	0.162522	1.795	49.6385	75.0079	53.09	175.187	175.063	3	2	2	2	1	0	3	13	22	0	0	2	2	0	0	1	0	0	1	0	0	0.1	6.94932	4.03954	2.93001	2.0166	1.44079	4.03954	2.93001	2.0166	1.44079	-1.77	7.85739	2.93568	1.40216	0	16.0598
422	O=C(CC1=CNC2=C1C=CC=C2)O	CC[Se][Se]CC	NC(C1=CN(CC2=CC=CC=C2)C=C(C(N)=O)C1C3=CC=CC=C3)=O	CC#N	CC[Se]CC1=CNC2=C1C=CC=C2	0	1.795	49.6385	75.0079	53.09	175.187	175.063	3	2	2	2	1	0	3	13	22	0	0	2	2	0	0	1	0	0	1	0	0	0.1	6.94932	4.03954	2.93001	2.0166	1.44079	4.03954	2.93001	2.0166	1.44079	-1.77	7.85739	2.93568	1.40216	0	16.0598
424	CC(N1C(C2=CC=C(Cl)C=C2)=O)=C(CC(O)=O)C3=C1C=CC(OC)=C3	C1([Se][Se]C2=CC=CC=C2)=CC=CC=C1	NC(C1=CN(CC2=CC=C(C(F)(F)F)C=C2)C=CC1)=O	CS(C)=O	CC(N1C(C2=CC=C(Cl)C=C2)=O)=C(C[Se]C3=CC=CC=C3)C4=C1C=CC(OC)=C4	0.794649	3.92732	95.7473	148.948	68.53	357.793	357.077	5	1	4	1	4	0	6	25	41	0	0	3	3	0	0	1	0	0	2	0	0	0.157895	14.5016	7.9985	6.10145	4.41613	3.07299	7.62054	5.66501	4.16415	2.947	-2.79	17.0467	6.60718	3.10467	4.73686	28.6599
425	COC1=CC=C(CC(O)=O)C=C1	C1([Se][Se]C2=CC=CC=C2)=CC=CC=C1	NC(C1=CN(CC2=CC=CC=C2)C=CC1)=O	CS(C)=O	COC1=CC=C(C[Se]C2=CC=CC=C2)C=C1	0.163936	1.3223	44.3338	70.5955	46.53	166.176	166.063	3	1	3	1	2	0	3	12	22	0	0	1	1	0	0	0	0	0	1	0	0	0.222222	6.78022	3.56858	2.41859	1.5144	0.918008	3.56858	2.41859	1.5144	0.918008	-1.51	8.58533	3.75887	2.26848	4.73686	18.1856
428	CC1=C(CC(O)=O)C=CC=C1	C1([Se][Se]C2=CC=CC=C2)=CC=CC=C1	NC(C1=CN(CC2=CC=C(C(F)(F)F)C=C2)C=CC1)=O	CS(C)=O	CC1=C(C[Se]C2=CC=CC=C2)C=CC=C1	0.259409	1.62212	42.5188	65.482	37.3	150.177	150.068	2	1	2	1	1	0	2	11	21	0	0	1	1	0	0	0	0	0	1	0	0	0.222222	6.37197	3.46219	2.497	1.60293	0.971355	3.46219	2.497	1.60293	0.971355	-1.31	7.7932	3.19116	2.07522	0	11.0758
442	O=C(CCCC1=CNC2=C1C=CC=C2)O	C1([Se][Se]C2=CC=CC=C2)=CC=CC=C1	NC(C1=CN(CC2=CC=CC=C2)C=C(C(N)=O)C1)=O	[H]C(N(C)C)=O	C1(CCC[Se]C2=CC=CC=C2)=CNC3=C1C=CC=C3	0.51044	2.5752	58.8725	87.7378	53.09	203.241	203.095	3	2	4	2	1	0	3	15	28	0	0	2	2	0	0	1	0	0	1	0	0	0.25	8.36353	5.03954	3.60679	2.51168	1.76852	5.03954	3.60679	2.51168	1.76852	-1.77	9.77244	4.17088	2.18007	0	16.0598
450	O=C(OCC1=CC=CC=C1)[C@H](NC(OC(C)(C)C)=O)CC(O)=O	C1([Se][Se]C2=CC=CC=C2)=CC=CC=C1	NC(C1=CN(CC2=CC=CC=C2)C=CC1)=O	[H]C(N(C)C)=O	O=C(OCC1=CC=CC=C1)[C@H](NC(OC(C)(C)C)=O)C[Se]C2=CC=CC=C2	0.871815	2.0978	81.6485	134.137	101.93	323.345	323.137	7	2	6	2	5	1	7	23	44	1	0	1	1	0	0	0	0	0	1	0	0	0.4375	13.3668	7.09042	5.88999	2.57815	1.64702	7.09042	5.88999	2.57815	1.64702	-2.57	18.4789	8.16525	7.84542	5.31679	34.7813
455	FC1(F)CCC(C(O)=O)CC1	C1([Se][Se]C2=CC=CC=C2)=CC=CC=C1	NC(C1=CN(CC2=CC=C(C(F)(F)F)C=C2)C=CC1)=O	CC#N	FC1(F)CCC([Se]C2=CC=CC=C2)CC1	0.22385	1.8965	34.5408	63.2099	37.3	164.151	164.065	2	1	1	1	1	0	4	11	21	0	0	1	0	1	1	0	0	0	0	1	1	0.857143	6.01717	3.61797	2.96846	2.06636	1.28709	3.61797	2.96846	2.06636	1.28709	-0.67	8.42681	2.75478	2.13307	0	16.9984
458	CC(C1=CC=C(CC2C(CCC2)=O)C=C1)C(O)=O	C1([Se][Se]C2=CC=CC=C2)=CC=CC=C1	NC(C1=CN(CC2=CC=CC=C2)C=C(C(N)=O)C1C3=CC=CC=C3)=O	CC#N	CC(C1=CC=C(CC2C(CCC2)=O)C=C1)[Se]C3=CC=CC=C3	0.216658	2.7864	68.5448	106.827	54.37	246.306	246.126	3	1	4	1	2	0	3	18	36	2	2	2	1	1	1	0	0	0	1	1	1	0.466667	10.5562	6.4202	5.0611	3.76335	2.47319	6.4202	5.0611	3.76335	2.47319	-1.64	12.8076	5.33759	2.78076	0	16.8591
462	CC(N(C(C1=C2C=CC=C1)=O)C2=O)C(O)=O	C1(C[Se][Se]CC2=CC=CC=C2)=CC=CC=C1	NC(C1=CN(CC2=CC=CC=C2)C=C(C(N)=O)C1)=O	CS(C)=O	CC(N(C(C1=C2C=CC=C1)=O)C2=O)[Se]CC3=CC=CC=C3	0.158555	0.7557	54.0398	91.2889	74.68	219.196	219.053	5	1	2	1	3	2	5	16	25	1	1	2	1	0	1	0	0	1	1	0	0	0.181818	8.50592	4.73477	3.5401	2.57017	1.67007	4.73477	3.5401	2.57017	1.67007	-2.17	10.3513	3.44496	1.28736	0	33.8319
469	CC(N1C(C2=CC=C(Cl)C=C2)=O)=C(CC(O)=O)C3=C1C=CC(OC)=C3	C1(C[Se][Se]CC2=CC=CC=C2)=CC=CC=C1	NC(C1=CN(CC2=CC=CC=C2)C=C(C(N)=O)C1C3=CC=CC=C3)=O	CS(C)=O	CC(N1C(C2=CC=C(Cl)C=C2)=O)=C(C[Se]CC3=CC=CC=C3)C4=C1C=CC(OC)=C4	0.05	3.92732	95.7473	148.948	68.53	357.793	357.077	5	1	4	1	4	0	6	25	41	0	0	3	3	0	0	1	0	0	2	0	0	0.157895	14.5016	7.9985	6.10145	4.41613	3.07299	7.62054	5.66501	4.16415	2.947	-2.79	17.0467	6.60718	3.10467	4.73686	28.6599
475	CC(N1C(C2=CC=C(Cl)C=C2)=O)=C(CC(O)=O)C3=C1C=CC(OC)=C3	C1(C[Se][Se]CC2=CC=CC=C2)=CC=CC=C1	NC(C1=CN(CC2=CC=CC=C2)C=CC1)=O	[H]C(N(C)C)=O	CC(N1C(C2=CC=C(Cl)C=C2)=O)=C(C[Se]CC3=CC=CC=C3)C4=C1C=CC(OC)=C4	0.016806	3.92732	95.7473	148.948	68.53	357.793	357.077	5	1	4	1	4	0	6	25	41	0	0	3	3	0	0	1	0	0	2	0	0	0.157895	14.5016	7.9985	6.10145	4.41613	3.07299	7.62054	5.66501	4.16415	2.947	-2.79	17.0467	6.60718	3.10467	4.73686	28.6599
478	CC1=CC=C(S(N2CCC(C(O)=O)CC2)(=O)=O)C=C1	C1(C[Se][Se]CC2=CC=CC=C2)=CC=CC=C1	NC(C1=CN(CC2=CC=C(OC)C=C2)C=CC1)=O	CC#N	CC1=CC=C(S(N2CCC([Se]CC3=CC=CC=C3)CC2)(=O)=O)C=C1	0.0082048	1.48032	70.2976	112.457	74.68	283.349	283.088	5	1	3	1	3	0	6	19	36	0	0	2	1	1	1	0	1	1	1	0	0	0.461538	11.5591	7.64682	6.76758	5.37479	3.67212	6.20676	4.82965	3.46193	2.20242	-1.4	14.0185	5.30321	2.95571	0	36.8884
486	O=C(OCC1=CC=CC=C1)[C@H](NC(OC(C)(C)C)=O)CC(O)=O	C1(C[Se][Se]CC2=CC=CC=C2)=CC=CC=C1	NC(C1=CN(CC2=CC=C(C(F)(F)F)C=C2)C=CC1)=O	CS(C)=O	O=C(OCC1=CC=CC=C1)[C@H](NC(OC(C)(C)C)=O)C[Se]CC2=CC=CC=C2	0.036069	2.0978	81.6485	134.137	101.93	323.345	323.137	7	2	6	2	5	1	7	23	44	1	0	1	1	0	0	0	0	0	1	0	0	0.4375	13.3668	7.09042	5.88999	2.57815	1.64702	7.09042	5.88999	2.57815	1.64702	-2.57	18.4789	8.16525	7.84542	5.31679	34.7813
491	O=C(N1CCC(C(O)=O)CC1)OCC2=CC=CC=C2	C1(C[Se][Se]CC2=CC=CC=C2)=CC=CC=C1	NC(C1=CN(CC2=CC=CC=C2)C=C(C(N)=O)C1)=O	CC#N	O=C(N1CCC([Se]CC2=CC=CC=C2)CC1)OCC3=CC=CC=C3	0.0047388	2.1198	68.5598	111.336	66.84	263.293	263.116	5	1	3	1	3	1	5	19	36	0	0	2	1	1	1	0	1	1	1	0	0	0.428571	10.6188	6.35013	4.63974	3.30753	2.11961	6.35013	4.63974	3.30753	2.11961	-2.04	13.393	6.22189	3.70857	0	35.1585
492	O=C(N1CCC(C(O)=O)CC1)OCC2=CC=CC=C2	C1(C[Se][Se]CC2=CC=CC=C2)=CC=CC=C1	NC(C1=CN(CC2=CC=CC=C2)C=C(C(N)=O)C1C3=CC=CC=C3)=O	CC#N	O=C(N1CCC([Se]CC2=CC=CC=C2)CC1)OCC3=CC=CC=C3	0.0030291	2.1198	68.5598	111.336	66.84	263.293	263.116	5	1	3	1	3	1	5	19	36	0	0	2	1	1	1	0	1	1	1	0	0	0.428571	10.6188	6.35013	4.63974	3.30753	2.11961	6.35013	4.63974	3.30753	2.11961	-2.04	13.393	6.22189	3.70857	0	35.1585
496	CC(C1=CC=C2C=C(OC)C=CC2=C1)C(O)=O	C1(C[Se][Se]CC2=CC=CC=C2)=CC=CC=C1	NC(C1=CN(CC2=CC=C(OC)C=C2)C=CC1)=O	CC#N	CC(C1=CC=C2C=C(OC)C=CC2=C1)[Se]CC3=CC=CC=C3	0.0687589	3.0365	66.5508	99.6421	46.53	230.263	230.094	3	1	3	1	2	0	3	17	31	1	1	2	2	0	0	0	0	0	2	0	0	0.214286	9.80516	5.42087	4.03244	2.94189	1.78119	5.42087	4.03244	2.94189	1.78119	-2.03	11.4553	4.45404	2.22849	4.73686	18.1856
506	CC(N(C(C1=C2C=CC=C1)=O)C2=O)C(O)=O	CC[Se][Se]CC	NC(C1=CN(CC2=CC=CC=C2)C=C(C(N)=O)C1)=O	[H]C(N(C)C)=O	CC(N(C(C1=C2C=CC=C1)=O)C2=O)[Se]CC	0	0.7557	54.0398	91.2889	74.68	219.196	219.053	5	1	2	1	3	2	5	16	25	1	1	2	1	0	1	0	0	1	1	0	0	0.181818	8.50592	4.73477	3.5401	2.57017	1.67007	4.73477	3.5401	2.57017	1.67007	-2.17	10.3513	3.44496	1.28736	0	33.8319
511	O=C1C2=CC(CC(O)=O)=CC=C2OCC3=CC=CC=C13	CC[Se][Se]CC	NC(C1=CN(CC2=CC=C(OC)C=C2)C=CC1)=O	[H]C(N(C)C)=O	O=C1C2=CC(C[Se]CC)=CC=C2OCC3=CC=CC=C13	0	2.4371	71.9883	115.173	63.6	268.268	268.074	4	1	2	1	3	0	4	20	32	0	0	3	2	0	1	0	0	1	2	0	0	0.125	10.6276	6.2507	4.67597	3.28911	2.3333	6.2507	4.67597	3.28911	2.3333	-2.62	12.4157	4.81063	2.15906	4.73686	16.8591
515	O=C1C2=CC(CC(O)=O)=CC=C2OCC3=CC=CC=C13	CC[Se][Se]CC	NC(C1=CN(CC2=CC=C(C(F)(F)F)C=C2)C=CC1)=O	CC#N	O=C1C2=CC(C[Se]CC)=CC=C2OCC3=CC=CC=C13	0	2.4371	71.9883	115.173	63.6	268.268	268.074	4	1	2	1	3	0	4	20	32	0	0	3	2	0	1	0	0	1	2	0	0	0.125	10.6276	6.2507	4.67597	3.28911	2.3333	6.2507	4.67597	3.28911	2.3333	-2.62	12.4157	4.81063	2.15906	4.73686	16.8591
521	BrC1=CC=C(CC(O)=O)C=C1	CC[Se][Se]CC	NC(C1=CN(CC2=CC=CC=C2)C=C(C(N)=O)C1)=O	CS(C)=O	BrC1=CC=C(C[Se]CC)C=C1	0.002307	2.0762	45.4818	72.9846	37.3	215.046	213.963	2	1	2	1	1	0	3	11	18	0	0	1	1	0	0	0	0	0	1	0	0	0.125	7.33593	3.93819	3.11266	1.79727	1.04121	3.14519	2.19698	1.26861	0.776878	-0.83	8.26833	3.52892	2.71792	0	11.0758
527	O=C(CC1=CNC2=C1C=CC=C2)O	CC[Se][Se]CC	NC(C1=CN(CC2=CC=CC=C2)C=C(C(N)=O)C1)=O	[H]C(N(C)C)=O	CC[Se]CC1=CNC2=C1C=CC=C2	0.00155	1.795	49.6385	75.0079	53.09	175.187	175.063	3	2	2	2	1	0	3	13	22	0	0	2	2	0	0	1	0	0	1	0	0	0.1	6.94932	4.03954	2.93001	2.0166	1.44079	4.03954	2.93001	2.0166	1.44079	-1.77	7.85739	2.93568	1.40216	0	16.0598
532	O=C(CC1=CNC2=C1C=CC=C2)O	CC[Se][Se]CC	NC(C1=CN(CC2=CC=CC=C2)C=C(C(N)=O)C1)=O	CC#N	CC[Se]CC1=CNC2=C1C=CC=C2	0	1.795	49.6385	75.0079	53.09	175.187	175.063	3	2	2	2	1	0	3	13	22	0	0	2	2	0	0	1	0	0	1	0	0	0.1	6.94932	4.03954	2.93001	2.0166	1.44079	4.03954	2.93001	2.0166	1.44079	-1.77	7.85739	2.93568	1.40216	0	16.0598
1	BrC1=CC=C(CC(O)=O)C=C1	C1([Se][Se]C2=CC=CC=C2)=CC=CC=C1	NC(C1=CN(CC2=CC=C(OC)C=C2)C=CC1)=O	CS(C)=O	BrC1=CC=C(C[Se]C2=CC=CC=C2)C=C1	0.27376	2.0762	45.4818	72.9846	37.3	215.046	213.963	2	1	2	1	1	0	3	11	18	0	0	1	1	0	0	0	0	0	1	0	0	0.125	7.33593	3.93819	3.11266	1.79727	1.04121	3.14519	2.19698	1.26861	0.776878	-0.83	8.26833	3.52892	2.71792	0	11.0758
5	CC1=CC=C(S(N2CCC(C(O)=O)CC2)(=O)=O)C=C1	C1([Se][Se]C2=CC=CC=C2)=CC=CC=C1	NC(C1=CN(CC2=CC=CC=C2)C=CC1)=O	CS(C)=O	CC1=CC=C(S(N2CCC([Se]C3=CC=CC=C3)CC2)(=O)=O)C=C1	0.99	1.48032	70.2976	112.457	74.68	283.349	283.088	5	1	3	1	3	0	6	19	36	0	0	2	1	1	1	0	1	1	1	0	0	0.461538	11.5591	7.64682	6.76758	5.37479	3.67212	6.20676	4.82965	3.46193	2.20242	-1.4	14.0185	5.30321	2.95571	0	36.8884
6	CC1=CC=C(S(N2CCC(C(O)=O)CC2)(=O)=O)C=C1	C1([Se][Se]C2=CC=CC=C2)=CC=CC=C1	NC(C1=CN(CC2=CC=C(OC)C=C2)C=CC1)=O	CS(C)=O	CC1=CC=C(S(N2CCC([Se]C3=CC=CC=C3)CC2)(=O)=O)C=C1	0.99	1.48032	70.2976	112.457	74.68	283.349	283.088	5	1	3	1	3	0	6	19	36	0	0	2	1	1	1	0	1	1	1	0	0	0.461538	11.5591	7.64682	6.76758	5.37479	3.67212	6.20676	4.82965	3.46193	2.20242	-1.4	14.0185	5.30321	2.95571	0	36.8884
18	FC1(F)CCC(C(O)=O)CC1	C1([Se][Se]C2=CC=CC=C2)=CC=CC=C1	NC(C1=CN(CC2=CC=C(OC)C=C2)C=CC1)=O	[H]C(N(C)C)=O	FC1(F)CCC([Se]C2=CC=CC=C2)CC1	0.249313	1.8965	34.5408	63.2099	37.3	164.151	164.065	2	1	1	1	1	0	4	11	21	0	0	1	0	1	1	0	0	0	0	1	1	0.857143	6.01717	3.61797	2.96846	2.06636	1.28709	3.61797	2.96846	2.06636	1.28709	-0.67	8.42681	2.75478	2.13307	0	16.9984
28	O=C(C1CCC1)O	C1([Se][Se]C2=CC=CC=C2)=CC=CC=C1	NC(C1=CN(CC2=CC=C(C(F)(F)F)C=C2)C=CC1)=O	[H]C(N(C)C)=O	C1([Se]C2=CC=CC=C2)CCC1	0.68023	0.8711	24.9768	42.1489	37.3	100.117	100.052	2	1	1	1	1	0	2	7	15	0	0	1	0	1	1	0	0	0	0	1	1	0.8	4.05413	2.5329	1.96606	1.45441	0.655199	2.5329	1.96606	1.45441	0.655199	-0.53	4.62456	1.52348	0.734423	0	11.0758
32	O=C(C1(C2=CC=CC=C2)CC1)O	C1([Se][Se]C2=CC=CC=C2)=CC=CC=C1	NC(C1=CN(CC2=CC=C(OC)C=C2)C=CC1)=O	[H]C(N(C)C)=O	C1(C2([Se]C3=CC=CC=C3)CC2)=CC=CC=C1	0	1.8028	44.9898	70.8411	37.3	162.188	162.068	2	1	2	1	1	0	2	12	22	0	0	2	1	1	1	0	0	0	1	1	1	0.3	6.65643	4.04552	3.25328	2.48576	1.5082	4.04552	3.25328	2.48576	1.5082	-1.31	7.34508	2.33834	0.915677	0	11.0758
45	O=C(N1CCC(C(O)=O)CC1)OCC2=CC=CC=C2	C1([Se][Se]C2=CC=CC=C2)=CC=CC=C1	NC(C1=CN(CC2=CC=C(C(F)(F)F)C=C2)C=CC1)=O	CC#N	O=C(N1CCC([Se]C2=CC=CC=C2)CC1)OCC3=CC=CC=C3	0.59056	2.1198	68.5598	111.336	66.84	263.293	263.116	5	1	3	1	3	1	5	19	36	0	0	2	1	1	1	0	1	1	1	0	0	0.428571	10.6188	6.35013	4.63974	3.30753	2.11961	6.35013	4.63974	3.30753	2.11961	-2.04	13.393	6.22189	3.70857	0	35.1585
47	O=C(OCC1=CC=CC=C1)[C@H](NC(OC(C)(C)C)=O)CC(O)=O	C1([Se][Se]C2=CC=CC=C2)=CC=CC=C1	NC(C1=CN(CC2=CC=C(OC)C=C2)C=CC1)=O	CC#N	O=C(OCC1=CC=CC=C1)[C@H](NC(OC(C)(C)C)=O)C[Se]C2=CC=CC=C2	0.901023	2.0978	81.6485	134.137	101.93	323.345	323.137	7	2	6	2	5	1	7	23	44	1	0	1	1	0	0	0	0	0	1	0	0	0.4375	13.3668	7.09042	5.88999	2.57815	1.64702	7.09042	5.88999	2.57815	1.64702	-2.57	18.4789	8.16525	7.84542	5.31679	34.7813
48	O=C(OCC1=CC=CC=C1)[C@H](NC(OC(C)(C)C)=O)CC(O)=O	C1([Se][Se]C2=CC=CC=C2)=CC=CC=C1	NC(C1=CN(CC2=CC=CC=C2)C=C(C(N)=O)C1C3=CC=CC=C3)=O	CC#N	O=C(OCC1=CC=CC=C1)[C@H](NC(OC(C)(C)C)=O)C[Se]C2=CC=CC=C2	0.084659	2.0978	81.6485	134.137	101.93	323.345	323.137	7	2	6	2	5	1	7	23	44	1	0	1	1	0	0	0	0	0	1	0	0	0.4375	13.3668	7.09042	5.88999	2.57815	1.64702	7.09042	5.88999	2.57815	1.64702	-2.57	18.4789	8.16525	7.84542	5.31679	34.7813
55	CC(N(C(C1=C2C=CC=C1)=O)C2=O)C(O)=O	C1(C[Se][Se]CC2=CC=CC=C2)=CC=CC=C1	NC(C1=CN(CC2=CC=CC=C2)C=CC1)=O	[H]C(N(C)C)=O	CC(N(C(C1=C2C=CC=C1)=O)C2=O)[Se]CC3=CC=CC=C3	0.202539	0.7557	54.0398	91.2889	74.68	219.196	219.053	5	1	2	1	3	2	5	16	25	1	1	2	1	0	1	0	0	1	1	0	0	0.181818	8.50592	4.73477	3.5401	2.57017	1.67007	4.73477	3.5401	2.57017	1.67007	-2.17	10.3513	3.44496	1.28736	0	33.8319
58	O=C1C2=CC(CC(O)=O)=CC=C2OCC3=CC=CC=C13	C1(C[Se][Se]CC2=CC=CC=C2)=CC=CC=C1	NC(C1=CN(CC2=CC=CC=C2)C=C(C(N)=O)C1)=O	[H]C(N(C)C)=O	O=C1C2=CC(C[Se]CC3=CC=CC=C3)=CC=C2OCC4=CC=CC=C14	0.285325	2.4371	71.9883	115.173	63.6	268.268	268.074	4	1	2	1	3	0	4	20	32	0	0	3	2	0	1	0	0	1	2	0	0	0.125	10.6276	6.2507	4.67597	3.28911	2.3333	6.2507	4.67597	3.28911	2.3333	-2.62	12.4157	4.81063	2.15906	4.73686	16.8591
61	CC(N1C(C2=CC=C(Cl)C=C2)=O)=C(CC(O)=O)C3=C1C=CC(OC)=C3	C1(C[Se][Se]CC2=CC=CC=C2)=CC=CC=C1	NC(C1=CN(CC2=CC=C(OC)C=C2)C=CC1)=O	[H]C(N(C)C)=O	CC(N1C(C2=CC=C(Cl)C=C2)=O)=C(C[Se]CC3=CC=CC=C3)C4=C1C=CC(OC)=C4	0.0226881	3.92732	95.7473	148.948	68.53	357.793	357.077	5	1	4	1	4	0	6	25	41	0	0	3	3	0	0	1	0	0	2	0	0	0.157895	14.5016	7.9985	6.10145	4.41613	3.07299	7.62054	5.66501	4.16415	2.947	-2.79	17.0467	6.60718	3.10467	4.73686	28.6599
62	CC(N(C(C1=C2C=CC=C1)=O)C2=O)C(O)=O	C1(C[Se][Se]CC2=CC=CC=C2)=CC=CC=C1	NC(C1=CN(CC2=CC=C(C(F)(F)F)C=C2)C=CC1)=O	CC#N	CC(N(C(C1=C2C=CC=C1)=O)C2=O)[Se]CC3=CC=CC=C3	0.245687	0.7557	54.0398	91.2889	74.68	219.196	219.053	5	1	2	1	3	2	5	16	25	1	1	2	1	0	1	0	0	1	1	0	0	0.181818	8.50592	4.73477	3.5401	2.57017	1.67007	4.73477	3.5401	2.57017	1.67007	-2.17	10.3513	3.44496	1.28736	0	33.8319
63	CC1=CC=C(S(N2CCC(C(O)=O)CC2)(=O)=O)C=C1	C1(C[Se][Se]CC2=CC=CC=C2)=CC=CC=C1	NC(C1=CN(CC2=CC=CC=C2)C=C(C(N)=O)C1)=O	CC#N	CC1=CC=C(S(N2CCC([Se]CC3=CC=CC=C3)CC2)(=O)=O)C=C1	0	1.48032	70.2976	112.457	74.68	283.349	283.088	5	1	3	1	3	0	6	19	36	0	0	2	1	1	1	0	1	1	1	0	0	0.461538	11.5591	7.64682	6.76758	5.37479	3.67212	6.20676	4.82965	3.46193	2.20242	-1.4	14.0185	5.30321	2.95571	0	36.8884
67	CC(C1=CC=C2C=C(OC)C=CC2=C1)C(O)=O	C1(C[Se][Se]CC2=CC=CC=C2)=CC=CC=C1	NC(C1=CN(CC2=CC=CC=C2)C=C(C(N)=O)C1)=O	CS(C)=O	CC(C1=CC=C2C=C(OC)C=CC2=C1)[Se]CC3=CC=CC=C3	0.005	3.0365	66.5508	99.6421	46.53	230.263	230.094	3	1	3	1	2	0	3	17	31	1	1	2	2	0	0	0	0	0	2	0	0	0.214286	9.80516	5.42087	4.03244	2.94189	1.78119	5.42087	4.03244	2.94189	1.78119	-2.03	11.4553	4.45404	2.22849	4.73686	18.1856
72	O=C(C1CCCCC1)O	C1(C[Se][Se]CC2=CC=CC=C2)=CC=CC=C1	NC(C1=CN(CC2=CC=CC=C2)C=CC1)=O	CC#N	C1([Se]CC2=CC=CC=C2)CCCCC1	0.0001404	1.6513	34.2108	54.8788	37.3	128.171	128.084	2	1	1	1	1	0	2	9	21	0	0	1	0	1	1	0	0	0	0	1	1	0.857143	5.46835	3.5329	2.67317	1.95441	1.34954	3.5329	2.67317	1.95441	1.34954	-0.53	6.58806	2.85257	1.6989	0	11.0758
73	O=C(C1CCC1)O	C1(C[Se][Se]CC2=CC=CC=C2)=CC=CC=C1	NC(C1=CN(CC2=CC=CC=C2)C=CC1)=O	CC#N	C1([Se]CC2=CC=CC=C2)CCC1	0.0225236	0.8711	24.9768	42.1489	37.3	100.117	100.052	2	1	1	1	1	0	2	7	15	0	0	1	0	1	1	0	0	0	0	1	1	0.8	4.05413	2.5329	1.96606	1.45441	0.655199	2.5329	1.96606	1.45441	0.655199	-0.53	4.62456	1.52348	0.734423	0	11.0758
76	CC(C1=CC=C2C=C(OC)C=CC2=C1)C(O)=O	C1(C[Se][Se]CC2=CC=CC=C2)=CC=CC=C1	NC(C1=CN(CC2=CC=CC=C2)C=CC1)=O	CC#N	CC(C1=CC=C2C=C(OC)C=CC2=C1)[Se]CC3=CC=CC=C3	0.0471642	3.0365	66.5508	99.6421	46.53	230.263	230.094	3	1	3	1	2	0	3	17	31	1	1	2	2	0	0	0	0	0	2	0	0	0.214286	9.80516	5.42087	4.03244	2.94189	1.78119	5.42087	4.03244	2.94189	1.78119	-2.03	11.4553	4.45404	2.22849	4.73686	18.1856
79	O=C(CCCC1=CNC2=C1C=CC=C2)O	CC[Se][Se]CC	NC(C1=CN(CC2=CC=C(OC)C=C2)C=CC1)=O	CS(C)=O	CC[Se]CCCC1=CNC2=C1C=CC=C2	0.529312	2.5752	58.8725	87.7378	53.09	203.241	203.095	3	2	4	2	1	0	3	15	28	0	0	2	2	0	0	1	0	0	1	0	0	0.25	8.36353	5.03954	3.60679	2.51168	1.76852	5.03954	3.60679	2.51168	1.76852	-1.77	9.77244	4.17088	2.18007	0	16.0598
90	O=C(CCCC1=CNC2=C1C=CC=C2)O	CC[Se][Se]CC	NC(C1=CN(CC2=CC=CC=C2)C=C(C(N)=O)C1C3=CC=CC=C3)=O	CC#N	CC[Se]CCCC1=CNC2=C1C=CC=C2	0.169753	2.5752	58.8725	87.7378	53.09	203.241	203.095	3	2	4	2	1	0	3	15	28	0	0	2	2	0	0	1	0	0	1	0	0	0.25	8.36353	5.03954	3.60679	2.51168	1.76852	5.03954	3.60679	2.51168	1.76852	-1.77	9.77244	4.17088	2.18007	0	16.0598
91	O=C1C2=CC(CC(O)=O)=CC=C2OCC3=CC=CC=C13	CC[Se][Se]CC	NC(C1=CN(CC2=CC=CC=C2)C=C(C(N)=O)C1)=O	CC#N	O=C1C2=CC(C[Se]CC)=CC=C2OCC3=CC=CC=C13	0	2.4371	71.9883	115.173	63.6	268.268	268.074	4	1	2	1	3	0	4	20	32	0	0	3	2	0	1	0	0	1	2	0	0	0.125	10.6276	6.2507	4.67597	3.28911	2.3333	6.2507	4.67597	3.28911	2.3333	-2.62	12.4157	4.81063	2.15906	4.73686	16.8591
92	O=C1C2=CC(CC(O)=O)=CC=C2OCC3=CC=CC=C13	CC[Se][Se]CC	NC(C1=CN(CC2=CC=CC=C2)C=C(C(N)=O)C1C3=CC=CC=C3)=O	CC#N	O=C1C2=CC(C[Se]CC)=CC=C2OCC3=CC=CC=C13	0	2.4371	71.9883	115.173	63.6	268.268	268.074	4	1	2	1	3	0	4	20	32	0	0	3	2	0	1	0	0	1	2	0	0	0.125	10.6276	6.2507	4.67597	3.28911	2.3333	6.2507	4.67597	3.28911	2.3333	-2.62	12.4157	4.81063	2.15906	4.73686	16.8591
97	COC1=CC=C(CC(O)=O)C=C1	CC[Se][Se]CC	NC(C1=CN(CC2=CC=CC=C2)C=CC1)=O	CS(C)=O	COC1=CC=C(C[Se]CC)C=C1	0.282558	1.3223	44.3338	70.5955	46.53	166.176	166.063	3	1	3	1	2	0	3	12	22	0	0	1	1	0	0	0	0	0	1	0	0	0.222222	6.78022	3.56858	2.41859	1.5144	0.918008	3.56858	2.41859	1.5144	0.918008	-1.51	8.58533	3.75887	2.26848	4.73686	18.1856
98	O=C(CC1=CNC2=C1C=CC=C2)O	CC[Se][Se]CC	NC(C1=CN(CC2=CC=CC=C2)C=CC1)=O	CS(C)=O	CC[Se]CC1=CNC2=C1C=CC=C2	0.580806	1.795	49.6385	75.0079	53.09	175.187	175.063	3	2	2	2	1	0	3	13	22	0	0	2	2	0	0	1	0	0	1	0	0	0.1	6.94932	4.03954	2.93001	2.0166	1.44079	4.03954	2.93001	2.0166	1.44079	-1.77	7.85739	2.93568	1.40216	0	16.0598
110	CC(N1C(C2=CC=C(Cl)C=C2)=O)=C(CC(O)=O)C3=C1C=CC(OC)=C3	C1([Se][Se]C2=CC=CC=C2)=CC=CC=C1	NC(C1=CN(CC2=CC=CC=C2)C=C(C(N)=O)C1)=O	CS(C)=O	CC(N1C(C2=CC=C(Cl)C=C2)=O)=C(C[Se]C3=CC=CC=C3)C4=C1C=CC(OC)=C4	0.675111	3.92732	95.7473	148.948	68.53	357.793	357.077	5	1	4	1	4	0	6	25	41	0	0	3	3	0	0	1	0	0	2	0	0	0.157895	14.5016	7.9985	6.10145	4.41613	3.07299	7.62054	5.66501	4.16415	2.947	-2.79	17.0467	6.60718	3.10467	4.73686	28.6599
115	CC1=C(CC(O)=O)C=CC=C1	C1([Se][Se]C2=CC=CC=C2)=CC=CC=C1	NC(C1=CN(CC2=CC=C(OC)C=C2)C=CC1)=O	CS(C)=O	CC1=C(C[Se]C2=CC=CC=C2)C=CC=C1	0.261432	1.62212	42.5188	65.482	37.3	150.177	150.068	2	1	2	1	1	0	2	11	21	0	0	1	1	0	0	0	0	0	1	0	0	0.222222	6.37197	3.46219	2.497	1.60293	0.971355	3.46219	2.497	1.60293	0.971355	-1.31	7.7932	3.19116	2.07522	0	11.0758
125	O=C(C1CCC1)O	C1([Se][Se]C2=CC=CC=C2)=CC=CC=C1	NC(C1=CN(CC2=CC=CC=C2)C=C(C(N)=O)C1C3=CC=CC=C3)=O	CS(C)=O	C1([Se]C2=CC=CC=C2)CCC1	0.483041	0.8711	24.9768	42.1489	37.3	100.117	100.052	2	1	1	1	1	0	2	7	15	0	0	1	0	1	1	0	0	0	0	1	1	0.8	4.05413	2.5329	1.96606	1.45441	0.655199	2.5329	1.96606	1.45441	0.655199	-0.53	4.62456	1.52348	0.734423	0	11.0758
131	CC(C1=CC=C(CC2C(CCC2)=O)C=C1)C(O)=O	C1([Se][Se]C2=CC=CC=C2)=CC=CC=C1	NC(C1=CN(CC2=CC=CC=C2)C=C(C(N)=O)C1)=O	[H]C(N(C)C)=O	CC(C1=CC=C(CC2C(CCC2)=O)C=C1)[Se]C3=CC=CC=C3	0.335969	2.7864	68.5448	106.827	54.37	246.306	246.126	3	1	4	1	2	0	3	18	36	2	2	2	1	1	1	0	0	0	1	1	1	0.466667	10.5562	6.4202	5.0611	3.76335	2.47319	6.4202	5.0611	3.76335	2.47319	-1.64	12.8076	5.33759	2.78076	0	16.8591
138	O=C(OCC1=CC=CC=C1)[C@H](NC(OC(C)(C)C)=O)CC(O)=O	C1([Se][Se]C2=CC=CC=C2)=CC=CC=C1	NC(C1=CN(CC2=CC=C(OC)C=C2)C=CC1)=O	[H]C(N(C)C)=O	O=C(OCC1=CC=CC=C1)[C@H](NC(OC(C)(C)C)=O)C[Se]C2=CC=CC=C2	0.85502	2.0978	81.6485	134.137	101.93	323.345	323.137	7	2	6	2	5	1	7	23	44	1	0	1	1	0	0	0	0	0	1	0	0	0.4375	13.3668	7.09042	5.88999	2.57815	1.64702	7.09042	5.88999	2.57815	1.64702	-2.57	18.4789	8.16525	7.84542	5.31679	34.7813
139	CC(C1=CC=C2C=C(OC)C=CC2=C1)C(O)=O	C1([Se][Se]C2=CC=CC=C2)=CC=CC=C1	NC(C1=CN(CC2=CC=CC=C2)C=C(C(N)=O)C1C3=CC=CC=C3)=O	[H]C(N(C)C)=O	CC(C1=CC=C2C=C(OC)C=CC2=C1)[Se]C3=CC=CC=C3	0.318711	3.0365	66.5508	99.6421	46.53	230.263	230.094	3	1	3	1	2	0	3	17	31	1	1	2	2	0	0	0	0	0	2	0	0	0.214286	9.80516	5.42087	4.03244	2.94189	1.78119	5.42087	4.03244	2.94189	1.78119	-2.03	11.4553	4.45404	2.22849	4.73686	18.1856
[truncated: 182 more rows]
[truncated: 554 more columns]

## Sheet: Figure S11_one-hot
Entry	Substrate_1	Substrate_2	Catalyst	Solvent	Product	Yield	Substrate_1 (InChI Code)	Substrate_2 (InChI Code)	Catalyst (InChI Code)	Solvent (InChI Code)	Product (InChI Code)	Substrate_1 (InChI Code) (right)	InChI=1S/C8H7BrO2/c9-7-3-1-6(2-4-7)5-8(10)11/h1-4H,5H2,(H,10,11)	InChI=1S/C12H13NO2/c14-12(15)7-3-4-9-8-13-11-6-2-1-5-10(9)11/h1-2,5-6,8,13H,3-4,7H2,(H,14,15)	InChI=1S/C13H17NO4S/c1-10-2-4-12(5-3-10)19(17,18)14-8-6-11(7-9-14)13(15)16/h2-5,11H,6-9H2,1H3,(H,15,16)	InChI=1S/C16H12O4/c17-15(18)8-10-5-6-14-13(7-10)16(19)12-4-2-1-3-11(12)9-20-14/h1-7H,8-9H2,(H,17,18)	InChI=1S/C14H17NO4/c16-13(17)12-6-8-15(9-7-12)14(18)19-10-11-4-2-1-3-5-11/h1-5,12H,6-10H2,(H,16,17)	InChI=1S/C16H21NO6/c1-16(2,3)23-15(21)17-12(9-13(18)19)14(20)22-10-11-7-5-4-6-8-11/h4-8,12H,9-10H2,1-3H3,(H,17,21)(H,18,19)/t12-/m1/s1	InChI=1S/C14H14O3/c1-9(14(15)16)10-3-4-12-8-13(17-2)6-5-11(12)7-10/h3-9H,1-2H3,(H,15,16)	InChI=1S/C10H10O2/c11-9(12)10(6-7-10)8-4-2-1-3-5-8/h1-5H,6-7H2,(H,11,12)	InChI=1S/C7H10F2O2/c8-7(9)3-1-5(2-4-7)6(10)11/h5H,1-4H2,(H,10,11)	InChI=1S/C15H18O3/c1-10(15(17)18)12-7-5-11(6-8-12)9-13-3-2-4-14(13)16/h5-8,10,13H,2-4,9H2,1H3,(H,17,18)	InChI=1S/C19H16ClNO4/c1-11-15(10-18(22)23)16-9-14(25-2)7-8-17(16)21(11)19(24)12-3-5-13(20)6-4-12/h3-9H,10H2,1-2H3,(H,22,23)	InChI=1S/C9H10O3/c1-12-8-4-2-7(3-5-8)6-9(10)11/h2-5H,6H2,1H3,(H,10,11)	InChI=1S/C6H10O3/c7-6(8)5-1-3-9-4-2-5/h5H,1-4H2,(H,7,8)	InChI=1S/C5H8O2/c6-5(7)4-2-1-3-4/h4H,1-3H2,(H,6,7)	InChI=1S/C9H10O2/c10-9(11)7-6-8-4-2-1-3-5-8/h1-5H,6-7H2,(H,10,11)	InChI=1S/C9H10O2/c1-7-2-4-8(5-3-7)6-9(10)11/h2-5H,6H2,1H3,(H,10,11)	InChI=1S/C11H9NO4/c1-6(11(15)16)12-9(13)7-4-2-3-5-8(7)10(12)14/h2-6H,1H3,(H,15,16)	InChI=1S/C7H12O2/c8-7(9)6-4-2-1-3-5-6/h6H,1-5H2,(H,8,9)	InChI=1S/C10H9NO2/c12-10(13)5-7-6-11-9-4-2-1-3-8(7)9/h1-4,6,11H,5H2,(H,12,13)	InChI=1S/C9H10O2/c1-7-4-2-3-5-8(7)6-9(10)11/h2-5H,6H2,1H3,(H,10,11)	Substrate_2 (InChI Code) (right)	InChI=1S/C12H10Se2/c1-3-7-11(8-4-1)13-14-12-9-5-2-6-10-12/h1-10H	InChI=1S/C14H14Se2/c1-3-7-13(8-4-1)11-15-16-12-14-9-5-2-6-10-14/h1-10H,11-12H2	InChI=1S/C4H10Se2/c1-3-5-6-4-2/h3-4H2,1-2H3	Catalyst (InChI Code) (right)	InChI=1S/C2H6OS/c1-4(2)3/h1-2H3	InChI=1S/C3H7NO/c1-4(2)3-5/h3H,1-2H3	InChI=1S/C2H3N/c1-2-3/h1H3	Solvent (InChI Code) (right)	InChI=1S/C2H6OS/c1-4(2)3/h1-2H3 (right)	InChI=1S/C3H7NO/c1-4(2)3-5/h3H,1-2H3 (right)	InChI=1S/C2H3N/c1-2-3/h1H3 (right)	Yield	Prediction (Yield)
[truncated: 532 more rows]

[truncated: 3 more sheets: Figure S12_external prediction, Figure 13_exteranl predition, Figure 14]
